# Supplementary material for: Multicolor Photochromism of Two-Component Diarylethene Crystals Containing Oxidized and Unoxidized Benzothiophene Groups
Source: MDPI journal article supplement (doi:10.3390/cryst12121730), 2022-11-29

## checkCIF/PLATON report

Structure factors have been supplied for datablock(s) 1a2a

THIS REPORT IS FOR GUIDANCE ONLY. IF USED AS PART OF A REVIEW PROCEDURE FOR PUBLICATION, IT SHOULD NOT REPLACE THE EXPERTISE OF AN EXPERIENCED CRYSTALLOGRAPHIC REFEREE.

No syntax errors found.      CIF dictionary      Interpreting this report

### Datablock: 1a2a

---

|                        |                     |                                  |
|------------------------|---------------------|----------------------------------|
| Bond precision:        | C-C = 0.0033 A      | Wavelength=0.71073               |
| Cell:                  | a=15.0533 (5)       | b=15.1878 (5)      c=10.6375 (3) |
|                        | alpha=90            | beta=107.8093 (13)      gamma=90 |
| Temperature:           | 223 K               |                                  |
|                        | Calculated          | Reported                         |
| Volume                 | 2315.47 (13)        | 2315.47 (13)                     |
| Space group            | C 2/c               | C 1 2/c 1                        |
| Hall group             | -C 2yc              | -C 2yc                           |
| Moiety formula         | C25 H18 F6 O3.57 S2 | ?                                |
| Sum formula            | C25 H18 F6 O3.57 S2 | C25 H18 F6 O3.57 S2              |
| Mr                     | 553.60              | 553.60                           |
| Dx, g cm <sup>-3</sup> | 1.588               | 1.588                            |
| Z                      | 4                   | 4                                |
| Mu (mm <sup>-1</sup> ) | 0.309               | 0.311                            |
| F000                   | 1130.2              | 1130.2                           |
| F000'                  | 1131.96             |                                  |
| h, k, lmax             | 18, 18, 13          | 18, 18, 13                       |
| Nref                   | 2367                | 2367                             |
| Tmin, Tmax             | 0.933, 0.956        | 0.910, 0.960                     |
| Tmin'                  | 0.861               |                                  |

Correction method= # Reported T Limits: Tmin=0.910 Tmax=0.960  
AbsCorr = MULTI-SCAN

Data completeness= 1.000      Theta(max)= 26.370

|                                |                                  |
|--------------------------------|----------------------------------|
| R(reflections)= 0.0529 ( 2162) | wR2(reflections)= 0.1420 ( 2367) |
| S = 1.245                      | Npar= 201                        |

---

The following ALERTS were generated. Each ALERT has the format

**test-name\_ALERT\_alert-type\_alert-level.**

Click on the hyperlinks for more details of the test.

---

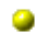

### Alert level C

|                   |                                                  |              |
|-------------------|--------------------------------------------------|--------------|
| PLAT077_ALERT_4_C | Unitcell Contains Non-integer Number of Atoms .. | Please Check |
| PLAT906_ALERT_3_C | Large K Value in the Analysis of Variance .....  | 2.113 Check  |

---

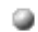

### Alert level G

|                   |                                                   |             |
|-------------------|---------------------------------------------------|-------------|
| PLAT230_ALERT_2_G | Hirshfeld Test Diff for F1A --C12 .               | 5.5 s.u.    |
| PLAT242_ALERT_2_G | Low 'MainMol' Ueq as Compared to Neighbors of C12 | Check       |
| PLAT300_ALERT_4_G | Atom Site Occupancy of F1A Constrained at         | 0.5 Check   |
| PLAT300_ALERT_4_G | Atom Site Occupancy of F1B Constrained at         | 0.5 Check   |
| PLAT300_ALERT_4_G | Atom Site Occupancy of F2A Constrained at         | 0.5 Check   |
| PLAT300_ALERT_4_G | Atom Site Occupancy of F2B Constrained at         | 0.5 Check   |
| PLAT300_ALERT_4_G | Atom Site Occupancy of F3 Constrained at          | 0.5 Check   |
| PLAT300_ALERT_4_G | Atom Site Occupancy of F4 Constrained at          | 0.5 Check   |
| PLAT300_ALERT_4_G | Atom Site Occupancy of C13 Constrained at         | 0.5 Check   |
| PLAT301_ALERT_3_G | Main Residue Disorder .....(Resd 1 )              | 29% Note    |
| PLAT304_ALERT_4_G | Non-Integer Number of Atoms in ..... (Resd 1 )    | 54.57 Check |
| PLAT367_ALERT_2_G | Long? C(sp?)-C(sp?) Bond C11 - C12 .              | 1.51 Ang.   |
| PLAT764_ALERT_4_G | Overcomplete CIF Bond List Detected (Rep/Expd) .  | 1.44 Ratio  |
| PLAT779_ALERT_4_G | Suspect or Irrelevant (Bond) Angle(s) in CIF ...  | 15.80 Deg.  |
|                   | C13 -C12 -C13 2_556 1_555 1_555 ..... #           | 34 Check    |
| PLAT779_ALERT_4_G | Suspect or Irrelevant (Bond) Angle(s) in CIF ...  | 40.40 Deg.  |
|                   | F3 -C13 -F3 2_556 1_555 1_555 ..... #             | 40 Check    |
| PLAT779_ALERT_4_G | Suspect or Irrelevant (Bond) Angle(s) in CIF ...  | 26.00 Deg.  |
|                   | C13 -C13 -F4 2_556 1_555 2_556 ..... #            | 53 Check    |
| PLAT779_ALERT_4_G | Suspect or Irrelevant (Bond) Angle(s) in CIF ...  | 20.00 Deg.  |
|                   | C13 -F3 -C13 2_556 1_555 1_555 ..... #            | 61 Check    |
| PLAT779_ALERT_4_G | Suspect or Irrelevant (Bond) Angle(s) in CIF ...  | 8.30 Deg.   |
|                   | C13 -F4 -C13 1_555 1_555 2_556 ..... #            | 66 Check    |
| PLAT883_ALERT_1_G | No Info/Value for _atom_sites_solution_primary .  | Please Do ! |
| PLAT910_ALERT_3_G | Missing # of FCF Reflection(s) Below Theta(Min).  | 1 Note      |
| PLAT933_ALERT_2_G | Number of HKL-OMIT Records in Embedded .res File  | 1 Note      |
| PLAT978_ALERT_2_G | Number C-C Bonds with Positive Residual Density.  | 8 Info      |

---

0 **ALERT level A** = Most likely a serious problem - resolve or explain  
0 **ALERT level B** = A potentially serious problem, consider carefully  
2 **ALERT level C** = Check. Ensure it is not caused by an omission or oversight  
22 **ALERT level G** = General information/check it is not something unexpected

1 ALERT type 1 CIF construction/syntax error, inconsistent or missing data  
5 ALERT type 2 Indicator that the structure model may be wrong or deficient  
3 ALERT type 3 Indicator that the structure quality may be low  
15 ALERT type 4 Improvement, methodology, query or suggestion  
0 ALERT type 5 Informative message, check

---

---

It is advisable to attempt to resolve as many as possible of the alerts in all categories. Often the minor alerts point to easily fixed oversights, errors and omissions in your CIF or refinement strategy, so attention to these fine details can be worthwhile. In order to resolve some of the more serious problems it may be necessary to carry out additional measurements or structure refinements. However, the purpose of your study may justify the reported deviations and the more serious of these should normally be commented upon in the discussion or experimental section of a paper or in the "special\_details" fields of the CIF. checkCIF was carefully designed to identify outliers and unusual parameters, but every test has its limitations and alerts that are not important in a particular case may appear. Conversely, the absence of alerts does not guarantee there are no aspects of the results needing attention. It is up to the individual to critically assess their own results and, if necessary, seek expert advice.

### **Publication of your CIF in IUCr journals**

A basic structural check has been run on your CIF. These basic checks will be run on all CIFs submitted for publication in IUCr journals (*Acta Crystallographica*, *Journal of Applied Crystallography*, *Journal of Synchrotron Radiation*); however, if you intend to submit to *Acta Crystallographica Section C* or *E* or *IUCrData*, you should make sure that full publication checks are run on the final version of your CIF prior to submission.

### **Publication of your CIF in other journals**

Please refer to the *Notes for Authors* of the relevant journal for any special instructions relating to CIF submission.

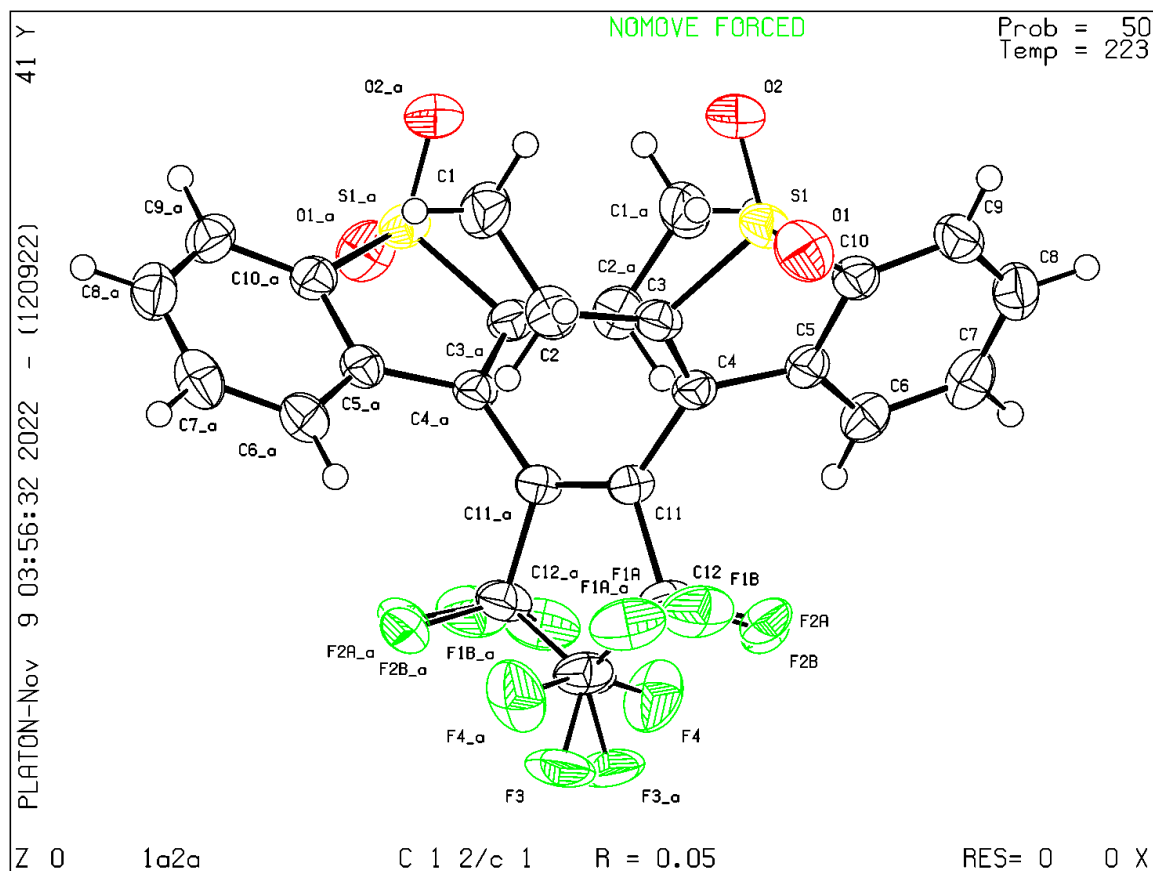

Supplement: s1 [file s1 › 3_1a2a_checkcif.pdf]
