# Supplementary material for: Multicolor Photochromism of Two-Component Diarylethene Crystals Containing Oxidized and Unoxidized Benzothiophene Groups
Source: MDPI journal article supplement (doi:10.3390/cryst12121730), 2022-11-29
Supplement: s1 [file s1]

Archive with 8 entries (8 files):
- 1_1a.cif
- 1_1a_checkcif.pdf
- 2_2a.cif
- 2_2a_checkcif.pdf
- 3_1a2a.cif
- 3_1a2a_checkcif.pdf
- crystals-2054041-Supplementary Figures.pdf
- morimoto_crystals_cmpd-check-list.pdf
