# Supplementary material for: Multicolor Photochromism of Two-Component Diarylethene Crystals Containing Oxidized and Unoxidized Benzothiophene Groups
Source: MDPI journal article supplement (doi:10.3390/cryst12121730), 2022-11-29
Supplement: s1 [file s1 › 1_1a.cif]

data_global

_publ_requested_journal          Crystals

_publ_contact_author_name        'Masakazu Morimoto'
_publ_contact_author_address     
;Department of Chemistry, Rikkyo University
3-34-1 Nishi-Ikebukuro, Toshima-ku, Tokyo 171-8501, Japan
;
_publ_contact_author_email       m-morimoto@rikkyo.ac.jp
_publ_contact_author_phone       ?
_publ_contact_author_fax         ?
loop_
_publ_author_name
_publ_author_address
'Nishimura, Ryo'
;Department of Chemistry, Rikkyo University
3-34-1 Nishi-Ikebukuro, Toshima-ku, Tokyo 171-8501, Japan
;
'Nagakawa, Yurika'
;Department of Chemistry, Rikkyo University
3-34-1 Nishi-Ikebukuro, Toshima-ku, Tokyo 171-8501, Japan
;
'Morimoto, Masakazu'
;Department of Chemistry, Rikkyo University
3-34-1 Nishi-Ikebukuro, Toshima-ku, Tokyo 171-8501, Japan
;
_audit_creation_method           'APEX3 v2015.9-0'

_publ_section_title              
;
;
_publ_section_abstract           
;
;
_publ_section_references         
;
;
_publ_section_comment            
;
;

data_1a
_chemical_name_systematic               ?
_chemical_name_common                   ?
_chemical_formula_moiety                ?
_chemical_formula_sum                   'C25 H18 F6 O4 S2'
_chemical_formula_iupac                 ?
_chemical_formula_weight                560.51

_chemical_melting_point                 ?

_space_group_crystal_system             monoclinic
_space_group_name_H-M_alt               'C 1 2/c 1'
_space_group_name_Hall                  '-C 2yc'
loop_
    _space_group_symop_operation_xyz
    'x, y, z'
    '-x, y, -z+1/2'
    'x+1/2, y+1/2, z'
    '-x+1/2, y+1/2, -z+1/2'
    '-x, -y, -z'
    'x, -y, z-1/2'
    '-x+1/2, -y+1/2, -z'
    'x+1/2, -y+1/2, z-1/2'

_cell_length_a                          15.0346(11)
_cell_length_b                          15.1774(11)
_cell_length_c                          10.7072(7)
_cell_angle_alpha                       90
_cell_angle_beta                        107.706(2)
_cell_angle_gamma                       90
_cell_volume                            2327.5(3)
_cell_formula_units_Z                   4
_cell_measurement_reflns_used           881
_cell_measurement_theta_min             2.4680
_cell_measurement_theta_max             22.6337
_cell_measurement_temperature           223.(2)

_exptl_crystal_description              block
_exptl_crystal_colour                   colourless
_exptl_crystal_size_max                 0.319
_exptl_crystal_size_mid                 0.116
_exptl_crystal_size_min                 0.075
_exptl_crystal_density_diffrn           1.600
_exptl_crystal_density_meas             ?
_exptl_crystal_density_method           'not measured'
_exptl_crystal_F_000                    1144

_exptl_absorpt_coefficient_mu           0.310
_exptl_absorpt_correction_type          multi-scan
_exptl_absorpt_process_details          'SADABS V2014/5 (Bruker AXS Inc.)'
_exptl_absorpt_correction_T_min         0.86
_exptl_absorpt_correction_T_max         0.98

_exptl_special_details                  
;
 The crystal was prepared by recrystallization from acetone.
; 

_diffrn_ambient_temperature             223.(2)

_diffrn_source                          ?
_diffrn_source_type                     ?

_diffrn_radiation_type                  'MoKa'
_diffrn_radiation_wavelength            0.71073
_diffrn_radiation_monochromator         ?

_diffrn_measurement_device_type         'Bruker D8 goniometer'
_diffrn_measurement_method              ?

_diffrn_detector_area_resol_mean        7.3910

_diffrn_reflns_number                   62209
_diffrn_reflns_av_R_equivalents         0.0621
_diffrn_reflns_av_unetI/netI            0.0222
_diffrn_reflns_theta_min                1.96
_diffrn_reflns_theta_max                25.02
_diffrn_reflns_theta_full               25.02
_diffrn_measured_fraction_theta_max     1.000
_diffrn_measured_fraction_theta_full    1.000
_diffrn_reflns_limit_h_min              -17
_diffrn_reflns_limit_h_max              17
_diffrn_reflns_limit_k_min              -18
_diffrn_reflns_limit_k_max              18
_diffrn_reflns_limit_l_min              -12
_diffrn_reflns_limit_l_max              12

_refine_special_details                 
;
 The hexafluorocyclopentene ring is disordered in the ratio of 50 : 50.
;

_reflns_number_total                    2057
_reflns_number_gt                       1738
_reflns_threshold_expression            'I > 2\s(I)'

_refine_ls_structure_factor_coef        Fsqd
_refine_ls_matrix_type                  full
_refine_ls_R_factor_all                 0.0417
_refine_ls_R_factor_gt                  0.0328
_refine_ls_wR_factor_gt                 0.0864
_refine_ls_wR_factor_ref                0.0906
_refine_ls_goodness_of_fit_ref          1.074
_refine_ls_restrained_S_all             1.074
_refine_ls_number_reflns                2057
_refine_ls_number_parameters            200
_refine_ls_number_restraints            0
_refine_ls_number_constraints           ?
_refine_ls_hydrogen_treatment           constr
_refine_ls_weighting_scheme             calc
_refine_ls_weighting_details            
    'w=1/[\s^2^(Fo^2^)+(0.0415P)^2^+2.4024P] where P=(Fo^2^+2Fc^2^)/3'

_atom_sites_solution_hydrogens          geom
_atom_sites_solution_primary            ?
_atom_sites_solution_secondary          ?

_refine_ls_shift/su_max                 0.000
_refine_ls_shift/su_mean                0.000
_refine_diff_density_max                0.248
_refine_diff_density_min                -0.321
_refine_ls_extinction_method            none
_refine_ls_extinction_coef              ?

loop_
    _atom_type_symbol
    _atom_type_description
    _atom_type_scat_dispersion_real
    _atom_type_scat_dispersion_imag
    _atom_type_scat_source
    C C 0.0033 0.0016 'International Tables Vol C Tables 4.2.6.8 and 6.1.1.4'
    H H 0.0000 0.0000 'International Tables Vol C Tables 4.2.6.8 and 6.1.1.4'
    O O 0.0106 0.0060 'International Tables Vol C Tables 4.2.6.8 and 6.1.1.4'
    F F 0.0171 0.0103 'International Tables Vol C Tables 4.2.6.8 and 6.1.1.4'
    S S 0.1246 0.1234 'International Tables Vol C Tables 4.2.6.8 and 6.1.1.4'

_computing_data_collection              ?
_computing_cell_refinement              'APEX3 v2015.9-0 (Bruker AXS)'
_computing_data_reduction               ?
_computing_structure_solution           ?
_computing_structure_refinement         'SHELXL-2014/7 (Sheldrick, 2014)'
_computing_molecular_graphics           ?
_computing_publication_material         ?

loop_
    _atom_site_type_symbol
    _atom_site_label
    _atom_site_fract_x
    _atom_site_fract_y
    _atom_site_fract_z
    _atom_site_U_iso_or_equiv
    _atom_site_adp_type
    _atom_site_calc_flag
    _atom_site_refinement_flags_adp
    _atom_site_refinement_flags_occupancy
    _atom_site_refinement_flags_posn
    _atom_site_occupancy
    _atom_site_disorder_assembly
    _atom_site_disorder_group
    C C1 0.08406(18) 0.39877(15) 0.9864(2) 0.0530(6) Uani d . . . 1 . .
    H H1A 0.1178 0.4514 0.9762 0.08 Uiso calc U . R 1 . .
    H H1B 0.0792 0.3967 1.0746 0.08 Uiso calc U . R 1 . .
    H H1C 0.022 0.3999 0.9237 0.08 Uiso calc U . R 1 . .
    C C2 0.13661(15) 0.31706(14) 0.96239(19) 0.0416(5) Uani d . . . 1 . .
    H H2A 0.2006 0.3186 1.0222 0.05 Uiso calc U . R 1 . .
    H H2B 0.1062 0.2643 0.9829 0.05 Uiso calc U . R 1 . .
    C C3 0.14013(13) 0.31034(12) 0.82500(19) 0.0316(4) Uani d . . . 1 . .
    C C4 0.09962(12) 0.25484(11) 0.72723(18) 0.0281(4) Uani d . . . 1 . .
    C C5 0.11927(12) 0.27348(11) 0.60139(18) 0.0292(4) Uani d . . . 1 . .
    C C6 0.08328(13) 0.23248(13) 0.48098(19) 0.0354(4) Uani d . . . 1 . .
    H H6 0.0412 0.1852 0.4707 0.043 Uiso calc U . R 1 . .
    C C7 0.11073(14) 0.26271(15) 0.3755(2) 0.0419(5) Uani d . . . 1 . .
    H H7 0.0877 0.2345 0.2938 0.05 Uiso calc U . R 1 . .
    C C8 0.17071(15) 0.33297(14) 0.3880(2) 0.0427(5) Uani d . . . 1 . .
    H H8 0.1875 0.3523 0.3148 0.051 Uiso calc U . R 1 . .
    C C9 0.20650(14) 0.37544(13) 0.5071(2) 0.0388(5) Uani d . . . 1 . .
    H H9 0.2472 0.4237 0.5165 0.047 Uiso calc U . R 1 . .
    C C10 0.18000(13) 0.34415(12) 0.61148(19) 0.0320(4) Uani d . . . 1 . .
    C C11 0.04183(12) 0.17873(11) 0.73988(18) 0.0280(4) Uani d . . . 1 . .
    C C12 0.07728(14) 0.08570(12) 0.7378(2) 0.0370(5) Uani d . . . 1 . .
    C C13 -0.0135(10) 0.0277(2) 0.734(2) 0.039(3) Uani d . P . 0.5 A .
    F F3 0.0104(4) -0.04817(16) 0.7944(3) 0.0701(14) Uani d . P . 0.5 . .
    F F4 -0.0453(2) 0.0080(2) 0.6014(3) 0.0691(9) Uani d . P . 0.5 . .
    O O1 0.30883(10) 0.36612(11) 0.84013(15) 0.0503(4) Uani d . . . 1 . .
    O O2 0.18124(12) 0.47449(9) 0.77376(16) 0.0524(4) Uani d . . . 1 . .
    F F1A 0.1412(3) 0.0672(2) 0.8643(4) 0.0530(9) Uani d . P . 0.5 A 1
    F F2A 0.1201(3) 0.0701(4) 0.6558(5) 0.0512(12) Uani d . P . 0.5 A 1
    F F1B 0.1653(2) 0.0771(3) 0.8089(5) 0.0612(11) Uani d . P . 0.5 A 2
    F F2B 0.0786(4) 0.0620(4) 0.6091(5) 0.0632(15) Uani d . P . 0.5 A 2
    S S1 0.21292(3) 0.38559(3) 0.77198(5) 0.03594(17) Uani d . . . 1 . .

loop_
    _atom_site_aniso_label
    _atom_site_aniso_U_11
    _atom_site_aniso_U_22
    _atom_site_aniso_U_33
    _atom_site_aniso_U_12
    _atom_site_aniso_U_13
    _atom_site_aniso_U_23
    C1 0.0639(15) 0.0489(14) 0.0557(14) -0.0164(11) 0.0323(12) -0.0213(11)
    C2 0.0456(12) 0.0440(12) 0.0364(11) -0.0086(9) 0.0142(9) -0.0055(9)
    C3 0.0323(10) 0.0253(9) 0.0386(10) -0.0010(8) 0.0132(8) -0.0002(8)
    C4 0.0280(9) 0.0216(9) 0.0365(10) 0.0025(7) 0.0129(8) -0.0002(7)
    C5 0.0288(9) 0.0247(9) 0.0367(10) 0.0049(7) 0.0136(8) 0.0004(8)
    C6 0.0331(10) 0.0336(10) 0.0408(11) 0.0025(8) 0.0131(9) -0.0032(8)
    C7 0.0435(12) 0.0488(13) 0.0345(11) 0.0132(10) 0.0131(9) -0.0003(9)
    C8 0.0466(12) 0.0471(13) 0.0406(12) 0.0125(10) 0.0223(10) 0.0115(10)
    C9 0.0398(11) 0.0314(10) 0.0503(12) 0.0049(9) 0.0213(9) 0.0087(9)
    C10 0.0320(10) 0.0258(9) 0.0404(11) 0.0032(8) 0.0146(8) 0.0018(8)
    C11 0.0313(9) 0.0220(9) 0.0316(9) 0.0006(7) 0.0107(8) -0.0019(7)
    C12 0.0374(11) 0.0259(10) 0.0493(12) 0.0046(8) 0.0155(10) -0.0020(9)
    C13 0.022(8) 0.0238(16) 0.067(10) -0.008(2) 0.009(6) 0.000(3)
    F3 0.079(3) 0.0217(11) 0.120(4) 0.0086(16) 0.046(4) 0.0212(15)
    F4 0.0656(19) 0.085(2) 0.0592(18) -0.0259(17) 0.0235(15) -0.0433(17)
    O1 0.0386(8) 0.0573(10) 0.0523(9) -0.0130(7) 0.0098(7) -0.0031(7)
    O2 0.0743(11) 0.0239(7) 0.0681(10) -0.0077(7) 0.0356(9) -0.0070(7)
    F1A 0.048(2) 0.0404(18) 0.056(2) 0.0116(15) -0.0070(15) 0.0010(15)
    F2A 0.059(3) 0.0305(18) 0.078(4) 0.0086(19) 0.042(2) -0.007(2)
    F1B 0.0361(19) 0.0392(17) 0.104(4) 0.0106(13) 0.0153(19) 0.006(2)
    F2B 0.118(5) 0.0305(18) 0.066(3) 0.005(3) 0.065(3) -0.006(2)
    S1 0.0399(3) 0.0277(3) 0.0433(3) -0.0083(2) 0.0172(2) -0.0040(2)

_geom_special_details                   
;

All esds (except the esd in the dihedral angle between two l.s. planes)
are estimated using the full covariance matrix.  The cell esds are taken
into account individually in the estimation of esds in distances, angles
and torsion angles; correlations between esds in cell parameters are only
used when they are defined by crystal symmetry.  An approximate (isotropic)
treatment of cell esds is used for estimating esds involving l.s. planes.
;

loop_
    _geom_bond_atom_site_label_1
    _geom_bond_atom_site_label_2
    _geom_bond_site_symmetry_2
    _geom_bond_distance
    _geom_bond_publ_flag
    C1 C2 . 1.534(3) ?
    C2 C3 . 1.492(3) ?
    C3 C4 . 1.337(3) ?
    C3 S1 . 1.7894(18) ?
    C4 C11 . 1.476(2) ?
    C4 C5 . 1.492(3) ?
    C5 C6 . 1.385(3) ?
    C5 C10 . 1.391(3) ?
    C6 C7 . 1.393(3) ?
    C7 C8 . 1.377(3) ?
    C8 C9 . 1.383(3) ?
    C9 C10 . 1.380(3) ?
    C10 S1 . 1.754(2) ?
    C11 C11 2_556 1.340(4) ?
    C11 C12 . 1.512(2) ?
    C12 F2A . 1.259(6) ?
    C12 F1B . 1.317(4) ?
    C12 C13 2_556 1.401(19) ?
    C12 F2B . 1.430(6) ?
    C12 F1A . 1.430(4) ?
    C12 C13 . 1.613(15) ?
    C13 C13 2_556 0.45(2) ?
    C13 F3 2_556 1.196(9) ?
    C13 F3 . 1.317(9) ?
    C13 F4 . 1.38(2) ?
    C13 C12 2_556 1.401(18) ?
    C13 F4 2_556 1.742(18) ?
    F3 F3 2_556 0.907(6) ?
    F3 C13 2_556 1.196(9) ?
    F3 F4 2_556 1.375(4) ?
    F4 F3 2_556 1.375(4) ?
    F4 C13 2_556 1.742(18) ?
    O1 S1 . 1.4348(16) ?
    O2 S1 . 1.4330(15) ?

loop_
    _geom_angle_atom_site_label_1
    _geom_angle_atom_site_label_2
    _geom_angle_atom_site_label_3
    _geom_angle_site_symmetry_1
    _geom_angle_site_symmetry_3
    _geom_angle
    _geom_angle_publ_flag
    C3 C2 C1 . . 113.29(18) ?
    C4 C3 C2 . . 132.12(17) ?
    C4 C3 S1 . . 109.30(14) ?
    C2 C3 S1 . . 118.54(14) ?
    C3 C4 C11 . . 124.18(17) ?
    C3 C4 C5 . . 114.80(16) ?
    C11 C4 C5 . . 121.00(15) ?
    C6 C5 C10 . . 118.69(17) ?
    C6 C5 C4 . . 128.84(17) ?
    C10 C5 C4 . . 112.43(16) ?
    C5 C6 C7 . . 118.60(19) ?
    C8 C7 C6 . . 121.55(19) ?
    C7 C8 C9 . . 120.68(19) ?
    C10 C9 C8 . . 117.33(19) ?
    C9 C10 C5 . . 123.13(19) ?
    C9 C10 S1 . . 127.25(16) ?
    C5 C10 S1 . . 109.60(14) ?
    C11 C11 C4 2_556 . 128.50(9) ?
    C11 C11 C12 2_556 . 110.78(10) ?
    C4 C11 C12 . . 120.64(15) ?
    F2A C12 C13 . 2_556 124.1(9) ?
    F1B C12 C13 . 2_556 116.5(5) ?
    F1B C12 F2B . . 103.0(3) ?
    C13 C12 F2B 2_556 . 105.2(9) ?
    F2A C12 F1A . . 106.5(3) ?
    C13 C12 F1A 2_556 . 88.8(7) ?
    F2A C12 C11 . . 116.3(3) ?
    F1B C12 C11 . . 112.4(2) ?
    C13 C12 C11 2_556 . 108.4(6) ?
    F2B C12 C11 . . 110.9(3) ?
    F1A C12 C11 . . 108.0(2) ?
    F2A C12 C13 . . 119.1(9) ?
    F1B C12 C13 . . 130.9(5) ?
    C13 C12 C13 2_556 . 15.0(12) ?
    F2B C12 C13 . . 95.6(9) ?
    F1A C12 C13 . . 103.7(7) ?
    C11 C12 C13 . . 102.2(4) ?
    C13 C13 F3 2_556 2_556 95.7(17) ?
    C13 C13 F3 2_556 . 64.6(18) ?
    F3 C13 F3 2_556 . 42.0(3) ?
    C13 C13 F4 2_556 . 138.(7) ?
    F3 C13 F4 2_556 . 63.9(9) ?
    F3 C13 F4 . . 105.8(8) ?
    C13 C13 C12 2_556 2_556 111.(6) ?
    F3 C13 C12 2_556 2_556 137.9(14) ?
    F3 C13 C12 . 2_556 123.0(19) ?
    F4 C13 C12 . 2_556 108.1(7) ?
    C13 C13 C12 2_556 . 54.(5) ?
    F3 C13 C12 2_556 . 115.7(15) ?
    F3 C13 C12 . . 111.3(8) ?
    F4 C13 C12 . . 99.8(15) ?
    C12 C13 C12 2_556 . 106.3(3) ?
    C13 C13 F4 2_556 2_556 32.(6) ?
    F3 C13 F4 2_556 2_556 92.5(7) ?
    F3 C13 F4 . 2_556 51.2(6) ?
    F4 C13 F4 . 2_556 155.6(7) ?
    C12 C13 F4 2_556 2_556 93.4(14) ?
    C12 C13 F4 . 2_556 84.4(5) ?
    F3 F3 C13 2_556 2_556 76.2(10) ?
    F3 F3 C13 2_556 . 61.8(9) ?
    C13 F3 C13 2_556 . 19.7(10) ?
    F3 F3 F4 2_556 2_556 140.9(2) ?
    C13 F3 F4 2_556 2_556 64.7(10) ?
    C13 F3 F4 . 2_556 80.6(8) ?
    F3 F4 C13 2_556 . 51.4(3) ?
    F3 F4 C13 2_556 2_556 48.3(2) ?
    C13 F4 C13 . 2_556 9.8(14) ?
    O2 S1 O1 . . 118.29(10) ?
    O2 S1 C10 . . 110.77(9) ?
    O1 S1 C10 . . 111.40(9) ?
    O2 S1 C3 . . 111.03(9) ?
    O1 S1 C3 . . 108.92(9) ?
    C10 S1 C3 . . 93.69(9) ?

_shelx_res_file                         
;


    mm415.res created by SHELXL-2014/7

TITL mm415 in C2/c
CELL 0.71073  15.03460  15.17740  10.70720  90.0000 107.7059  90.0000
ZERR    4.00   0.00110   0.00110   0.00070   0.0000   0.0023   0.0000
LATT 7
SYMM -X, Y, 0.5-Z
SFAC C  H  O  F  S
UNIT 100  72  16  24  8
L.S. 75
ACTA
BOND
FMAP 2
PLAN 20
SIZE 0.075 0.116 0.319
TEMP -50
WGHT    0.041500    2.402400
FVAR       0.13700
MOLE 1
C1    1    0.084064    0.398773    0.986431    11.00000    0.06385    0.04891 =
         0.05571   -0.02127    0.03226   -0.01636
AFIX 137
H1A   2    0.117784    0.451404    0.976197    11.00000   -1.50000
H1B   2    0.079155    0.396741    1.074643    11.00000   -1.50000
H1C   2    0.022016    0.399854    0.923655    11.00000   -1.50000
AFIX   0
C2    1    0.136612    0.317063    0.962392    11.00000    0.04562    0.04404 =
         0.03642   -0.00549    0.01416   -0.00859
AFIX  23
H2A   2    0.200555    0.318593    1.022206    11.00000   -1.20000
H2B   2    0.106200    0.264273    0.982915    11.00000   -1.20000
AFIX   0
C3    1    0.140131    0.310344    0.824996    11.00000    0.03233    0.02531 =
         0.03861   -0.00021    0.01317   -0.00096
C4    1    0.099618    0.254844    0.727230    11.00000    0.02802    0.02164 =
         0.03653   -0.00018    0.01286    0.00246
C5    1    0.119265    0.273478    0.601390    11.00000    0.02876    0.02466 =
         0.03671    0.00037    0.01359    0.00494
C6    1    0.083282    0.232475    0.480984    11.00000    0.03311    0.03359 =
         0.04085   -0.00323    0.01309    0.00248
AFIX  43
H6    2    0.041223    0.185237    0.470664    11.00000   -1.20000
AFIX   0
C7    1    0.110727    0.262707    0.375493    11.00000    0.04346    0.04876 =
         0.03448   -0.00032    0.01315    0.01319
AFIX  43
H7    2    0.087748    0.234466    0.293846    11.00000   -1.20000
AFIX   0
C8    1    0.170708    0.332968    0.387989    11.00000    0.04661    0.04713 =
         0.04055    0.01146    0.02229    0.01245
AFIX  43
H8    2    0.187522    0.352285    0.314846    11.00000   -1.20000
AFIX   0
C9    1    0.206496    0.375439    0.507078    11.00000    0.03977    0.03143 =
         0.05026    0.00872    0.02131    0.00490
AFIX  43
H9    2    0.247229    0.423676    0.516514    11.00000   -1.20000
AFIX   0
C10   1    0.179997    0.344151    0.611483    11.00000    0.03202    0.02581 =
         0.04044    0.00178    0.01460    0.00316
C11   1    0.041830    0.178733    0.739876    11.00000    0.03126    0.02201 =
         0.03158   -0.00191    0.01068    0.00060
C12   1    0.077284    0.085703    0.737847    11.00000    0.03740    0.02585 =
         0.04929   -0.00200    0.01548    0.00463
C13   1   -0.013473    0.027738    0.733879    10.50000    0.02180    0.02382 =
         0.06686    0.00009    0.00874   -0.00758
F3    4    0.010363   -0.048173    0.794433    10.50000    0.07880    0.02174 =
         0.12011    0.02124    0.04588    0.00864
F4    4   -0.045266    0.008017    0.601398    10.50000    0.06565    0.08535 =
         0.05924   -0.04328    0.02354   -0.02588
O1    3    0.308825    0.366117    0.840125    11.00000    0.03858    0.05733 =
         0.05233   -0.00310    0.00984   -0.01302
O2    3    0.181240    0.474489    0.773759    11.00000    0.07434    0.02393 =
         0.06813   -0.00703    0.03557   -0.00775
PART 1
F1A   4    0.141234    0.067164    0.864335    10.50000    0.04755    0.04039 =
         0.05596    0.00097   -0.00696    0.01156
F2A   4    0.120060    0.070094    0.655795    10.50000    0.05936    0.03052 =
         0.07804   -0.00727    0.04228    0.00855
PART 2
F1B   4    0.165334    0.077105    0.808887    10.50000    0.03610    0.03921 =
         0.10425    0.00567    0.01525    0.01056
F2B   4    0.078610    0.062018    0.609136    10.50000    0.11792    0.03050 =
         0.06606   -0.00580    0.06524    0.00492
PART 0
S1    5    0.212925    0.385587    0.771985    11.00000    0.03986    0.02769 =
         0.04333   -0.00401    0.01724   -0.00833
HKLF 4

REM  mm415 in C2/c
REM R1 =  0.0328 for    1738 Fo > 4sig(Fo)  and  0.0417 for all    2057 data
REM    200 parameters refined using      0 restraints

END

WGHT      0.0415      2.4024

REM Highest difference peak  0.248,  deepest hole -0.321,  1-sigma level  0.046
Q1    1   0.1989  0.3589  0.6828  11.00000  0.05    0.25
Q2    1   0.1549  0.3080  0.6059  11.00000  0.05    0.19
Q3    1   0.0631  0.1376  0.7339  11.00000  0.05    0.19
Q4    1   0.1111  0.2614  0.6605  11.00000  0.05    0.19
Q5    1   0.2010  0.3478  0.5781  11.00000  0.05    0.18
Q6    1   0.1698  0.3421  0.8062  11.00000  0.05    0.17
Q7    1   0.1223  0.2311  0.4422  11.00000  0.05    0.17
Q8    1   0.1061  0.2505  0.5472  11.00000  0.05    0.15
Q9    1   0.0206  0.3253  0.4013  11.00000  0.05    0.14
Q10   1   0.1414  0.2663  0.7954  11.00000  0.05    0.14
Q11   1   0.0644  0.4826  0.9152  11.00000  0.05    0.14
Q12   1   0.2041  0.3342  0.4658  11.00000  0.05    0.14
Q13   1  -0.0035  0.4621  1.1098  11.00000  0.05    0.13
Q14   1   0.0144  0.1799  0.7900  11.00000  0.05    0.13
Q15   1   0.0733  0.2172  0.7416  11.00000  0.05    0.12
Q16   1   0.2829  0.3992  0.8782  11.00000  0.05    0.12
Q17   1   0.1594  0.2872  0.4064  11.00000  0.05    0.12
Q18   1   0.1611  0.3681  0.4432  11.00000  0.05    0.12
Q19   1  -0.0008  0.3843  1.1661  11.00000  0.05    0.12
Q20   1   0.0682  0.1581  0.2624  11.00000  0.05    0.11
;
_shelx_res_checksum                     4926

_shelx_hkl_file                         
;
   2   0   0   99.19    8.50
   2   0   0  101.41    8.50
   2   0   0  100.11    8.50
   2   0   0  102.74    8.50
   2   0   0  101.18    8.50
   2   0   0  101.36    8.49
  -2   0   0  103.17    8.49
  -2   0   0   93.19    8.49
  -2   0   0   99.74    8.49
  -2   0   0  109.41    8.50
  -2   0   0  103.63    8.50
  -2   0   0  102.55    8.50
   4   0   0  491.95   41.10
   4   0   0  490.29   41.09
  -4   0   0  490.63   41.09
  -4   0   0  470.95   41.09
  -4   0   0  488.36   41.09
  -4   0   0  508.73   41.09
  -4   0   0  495.67   41.10
  -4   0   0  495.88   41.10
   4   0   0  513.49   41.09
   4   0   0  480.12   41.09
   4   0   0  503.86   41.09
   4   0   0  507.61   41.09
   4   0   0  513.60   41.10
   4   0   0  481.23   41.10
  -4   0   0  501.86   41.09
  -4   0   0  489.61   41.10
  -4   0   0  500.95   41.09
  -4   0   0  500.05   41.10
   4   0   0  476.96   41.09
   6   0   0   24.18    2.17
   6   0   0   24.52    2.19
   6   0   0   24.26    2.19
   6   0   0   25.63    2.17
   6   0   0   27.84    2.17
   6   0   0   25.05    2.16
   6   0   0   26.83    2.16
  -6   0   0   25.59    2.15
  -6   0   0   26.01    2.18
  -6   0   0   25.36    2.19
   6   0   0   26.26    2.19
  -6   0   0   22.21    2.20
  -6   0   0   26.11    2.17
  -6   0   0   24.81    2.20
  -6   0   0   26.78    2.22
  -6   0   0   24.66    2.18
  -6   0   0   25.46    2.17
  -6   0   0   24.80    2.18
   6   0   0   23.44    2.21
   8   0   0   68.92    5.85
  -8   0   0   67.10    5.83
  -8   0   0   72.06    5.83
  -8   0   0   70.43    5.83
  -8   0   0   66.89    5.79
  -8   0   0   69.46    5.85
  -8   0   0   64.51    5.83
  -8   0   0   66.85    5.82
  -8   0   0   70.43    5.85
  -8   0   0   68.90    5.86
  -8   0   0   70.70    5.81
   8   0   0   70.91    5.80
   8   0   0   77.53    5.84
   8   0   0   67.04    5.85
   8   0   0   66.44    5.84
   8   0   0   68.93    5.82
 -10   0   0   91.07    8.00
 -10   0   0   94.13    8.02
  10   0   0   94.69    7.93
  10   0   0   94.65    7.97
  10   0   0   93.61    7.99
  10   0   0   95.99    8.02
 -10   0   0   99.15    7.99
 -10   0   0   95.43    7.97
 -10   0   0   88.88    7.97
 -10   0   0   98.47    8.02
 -10   0   0   92.46    7.97
  10   0   0  101.87    7.93
  10   0   0   95.06    7.98
 -10   0   0   92.56    7.92
  10   0   0   93.87    7.98
 -10   0   0   92.79    7.98
  12   0   0   21.76    1.91
  12   0   0   18.02    1.73
 -12   0   0   18.30    1.78
 -12   0   0   17.76    1.88
  12   0   0   19.14    1.96
  12   0   0   21.89    1.79
 -12   0   0   20.74    2.20
  12   0   0   16.03    1.99
 -12   0   0   14.76    1.99
 -12   0   0   18.29    1.95
 -12   0   0   14.38    1.92
  12   0   0   19.85    1.74
 -12   0   0   13.65    1.68
 -12   0   0   14.27    1.83
 -12   0   0   18.21    1.94
 -12   0   0   23.09    2.15
  12   0   0   19.85    2.06
 -14   0   0    6.62    1.30
 -14   0   0    7.18    1.66
  14   0   0    4.17    1.29
  14   0   0    5.58    1.60
  14   0   0    5.01    1.26
  14   0   0    3.43    1.40
  14   0   0    4.89    0.95
  14   0   0    3.63    1.39
 -14   0   0    3.22    1.47
 -14   0   0    3.44    1.10
 -14   0   0    5.76    1.84
 -14   0   0    3.35    1.36
  14   0   0    4.90    1.82
  14   0   0    5.58    0.96
 -14   0   0    4.76    1.44
 -14   0   0    4.36    0.99
 -14   0   0    2.66    0.85
  16   0   0    2.45    2.10
 -16   0   0    1.19    2.02
  16   0   0    3.39    1.75
 -16   0   0   -3.68    2.53
 -16   0   0    1.65    1.80
 -16   0   0    2.11    2.06
 -16   0   0    1.11    1.16
  16   0   0   -0.05    1.70
  16   0   0    1.15    1.04
 -16   0   0    2.20    1.05
 -16   0   0    2.30    1.46
  16   0   0    3.83    2.00
 -16   0   0    1.29    1.52
  16   0   0    0.72    1.10
  16   0   0    0.30    2.48
  -1  -1   0  103.43    9.48
   1  -1   0  120.13    9.48
  -1  -1   0  127.77    9.47
   1  -1   0  109.39    9.48
  -1   1   0  107.40    9.47
   1   1   0  122.60    9.47
   1   1   0   98.02    9.47
   1   1   0  123.62    9.48
  -3  -1   0  611.38   49.50
  -3  -1   0  599.05   49.50
  -3  -1   0  571.52   49.50
   3  -1   0  601.47   49.50
  -3  -1   0  588.39   49.50
  -3  -1   0  606.97   49.51
   3  -1   0  601.90   49.50
   3  -1   0  606.70   49.50
  -3  -1   0  593.06   49.50
  -3  -1   0  599.57   49.50
   3  -1   0  586.80   49.49
   3  -1   0  572.95   49.50
  -3  -1   0  596.75   49.50
  -3  -1   0  597.03   49.50
   3   1   0  589.79   49.50
  -3   1   0  619.96   49.50
   3   1   0  583.56   49.50
   3   1   0  600.72   49.50
   3   1   0  613.39   49.50
   3   1   0  595.97   49.50
  -3   1   0  599.33   49.50
  -3   1   0  588.60   49.50
   3   1   0  607.58   49.50
  -3   1   0  585.20   49.50
  -3   1   0  588.66   49.50
   5  -1   0  129.95   10.32
  -5  -1   0  124.22   10.33
  -5  -1   0  124.97   10.33
  -5  -1   0  119.32   10.33
  -5  -1   0  131.06   10.34
   5  -1   0  126.60   10.33
   5  -1   0  126.04   10.34
   5  -1   0  128.07   10.34
   5  -1   0  116.12   10.32
   5  -1   0  125.76   10.33
   5  -1   0  129.50   10.33
  -5  -1   0  126.13   10.33
  -5  -1   0  124.97   10.33
  -5  -1   0  124.42   10.33
   5  -1   0  130.48   10.33
  -5  -1   0  119.63   10.34
   5  -1   0  121.65   10.34
  -5  -1   0  126.05   10.32
  -5   1   0  126.77   10.33
   5   1   0  124.09   10.32
  -5   1   0  118.90   10.33
  -5   1   0  122.94   10.33
  -5   1   0  124.89   10.34
  -5   1   0  126.12   10.32
  -5   1   0  116.94   10.32
   5   1   0  123.31   10.34
   5   1   0  122.45   10.34
  -5   1   0  124.86   10.33
  -5   1   0  123.78   10.33
  -5   1   0  124.98   10.33
  -5   1   0  121.80   10.34
   5   1   0  124.34   10.33
   5   1   0  123.29   10.33
   5   1   0  125.07   10.33
   5   1   0  117.70   10.34
   5   1   0  118.52   10.32
   5   1   0  122.42   10.32
   7  -1   0   77.77    6.75
  -7  -1   0   76.92    6.77
  -7  -1   0   81.20    6.79
  -7  -1   0   79.24    6.80
   7  -1   0   82.40    6.77
  -7  -1   0   83.81    6.77
  -7  -1   0   80.66    6.77
  -7  -1   0   81.53    6.75
  -7  -1   0   82.88    6.77
   7  -1   0   80.76    6.75
  -7  -1   0   80.46    6.78
   7  -1   0   81.70    6.79
   7  -1   0   84.59    6.79
   7  -1   0   79.05    6.77
  -7  -1   0   78.35    6.77
   7  -1   0   79.06    6.77
   7  -1   0   82.06    6.78
   7  -1   0   81.16    6.76
   7   1   0   79.17    6.78
  -7   1   0   74.85    6.76
   7   1   0   79.18    6.75
  -7   1   0   77.79    6.77
  -7   1   0   73.85    6.74
   7   1   0   83.09    6.75
  -7   1   0   85.62    6.76
   7   1   0   78.57    6.77
   7   1   0   85.72    6.76
  -7   1   0   78.55    6.76
   7   1   0   78.37    6.77
  -7   1   0   86.67    6.78
   7   1   0   80.09    6.78
   7   1   0   84.31    6.76
  -7   1   0   79.46    6.76
  -7   1   0   82.23    6.77
  -7   1   0   83.20    6.77
  -7   1   0   80.42    6.78
   7   1   0   82.78    6.78
  -9  -1   0   22.59    1.97
  -9  -1   0   18.35    2.14
  -9  -1   0   20.33    1.94
  -9  -1   0   22.08    2.04
  -9  -1   0   22.83    2.11
  -9  -1   0   22.12    2.04
  -9  -1   0   22.10    2.03
   9  -1   0   22.71    2.09
  -9  -1   0   23.55    2.01
   9  -1   0   23.59    1.97
   9  -1   0   21.84    1.95
  -9  -1   0   21.35    2.08
   9  -1   0   20.98    2.11
   9  -1   0   21.55    2.00
   9  -1   0   21.87    2.02
   9  -1   0   22.08    2.04
   9  -1   0   24.66    2.05
  -9  -1   0   22.64    2.12
  -9   1   0   23.70    2.12
  -9   1   0   22.20    2.04
   9   1   0   24.14    2.01
  -9   1   0   22.54    2.00
   9   1   0   21.54    1.97
   9   1   0   26.03    2.06
  -9   1   0   23.06    2.05
  -9   1   0   23.41    2.01
   9   1   0   21.66    1.96
   9   1   0   22.39    1.99
  -9   1   0   22.42    1.93
   9   1   0   21.13    1.95
  -9   1   0   19.45    2.01
  -9   1   0   18.95    2.10
   9   1   0   19.79    2.01
   9   1   0   22.45    2.06
  -9   1   0   19.64    2.08
  -9   1   0   21.64    1.99
   9   1   0   26.00    2.36
 -11  -1   0    0.37    0.71
  11  -1   0    0.51    0.53
 -11  -1   0    0.02    0.87
 -11  -1   0    0.64    0.52
  11  -1   0   -0.06    0.74
  11  -1   0    0.23    0.76
 -11  -1   0    0.49    0.75
  11  -1   0    0.70    0.77
 -11  -1   0   -0.25    0.78
 -11  -1   0    1.42    0.88
  11  -1   0    0.68    1.05
  11  -1   0    0.69    0.89
 -11  -1   0   -0.44    0.57
 -11  -1   0   -0.79    0.99
 -11  -1   0   -0.71    0.94
  11  -1   0    0.30    0.52
  11  -1   0   -0.28    0.84
 -11  -1   0   -0.14    0.77
  11   1   0    0.01    0.77
 -11   1   0    0.43    0.89
  11   1   0    0.32    0.76
 -11   1   0   -0.31    0.61
 -11   1   0    0.53    0.71
  11   1   0    0.23    0.54
 -11   1   0    0.45    0.83
 -11   1   0    0.39    0.67
  11   1   0    0.98    1.00
  11   1   0   -0.19    0.63
  11   1   0    0.82    0.80
 -11   1   0   -0.08    1.04
 -11   1   0   -0.67    0.88
 -11   1   0    0.21    0.60
 -11   1   0    0.17    0.47
  11   1   0   -0.31    0.52
  13  -1   0    0.94    1.12
  13  -1   0    1.33    1.10
  13  -1   0    0.50    0.73
  13  -1   0    1.25    1.05
  13  -1   0    0.62    1.04
  13  -1   0    1.76    1.57
 -13  -1   0   -0.12    1.51
 -13  -1   0   -0.89    0.97
 -13  -1   0   -0.07    1.07
 -13  -1   0    0.03    1.01
 -13  -1   0   -0.05    1.12
 -13  -1   0    1.11    1.32
  13  -1   0    0.84    1.20
 -13  -1   0   -0.26    1.25
 -13  -1   0    0.55    1.00
 -13  -1   0    0.62    0.66
  13   1   0    0.54    1.24
  13   1   0    0.95    0.66
  13   1   0   -0.09    1.10
 -13   1   0    0.37    1.04
 -13   1   0   -0.21    0.63
 -13   1   0    0.40    0.89
 -13   1   0    0.93    1.16
 -13   1   0    0.60    0.94
 -13   1   0    0.16    1.40
  13   1   0    0.83    1.15
 -13   1   0    0.91    1.22
  13   1   0    1.58    1.00
  13   1   0   -0.41    1.06
  13   1   0    0.06    0.74
 -13   1   0    0.30    1.25
 -15  -1   0    0.59    1.90
  15  -1   0    2.73    1.74
 -15  -1   0   -0.29    1.27
  15  -1   0    0.48    0.93
  15  -1   0   -1.61    1.58
 -15  -1   0   -0.13    1.70
 -15  -1   0    0.91    2.09
  15  -1   0   -0.20    1.40
  15  -1   0   -0.28    0.93
  15  -1   0   -0.21    1.90
 -15  -1   0    0.22    0.92
 -15  -1   0    0.10    2.13
 -15  -1   0    0.73    1.01
  15  -1   0    0.03    1.37
 -15  -1   0    2.38    1.59
 -15  -1   0    0.06    1.44
 -15   1   0   -0.78    2.21
  15   1   0    0.54    1.40
  15   1   0   -0.08    1.41
 -15   1   0    0.48    2.09
 -15   1   0   -0.22    1.30
 -15   1   0   -1.57    1.64
  15   1   0    0.65    1.67
 -15   1   0    0.68    1.50
  15   1   0   -0.57    1.07
  15   1   0    0.29    0.89
  15   1   0    1.39    0.94
 -15   1   0    0.41    0.82
  15   1   0    0.36    1.77
  15   1   0   -1.26    1.60
 -15   1   0   -0.73    1.88
 -15   1   0    1.13    1.65
 -15   1   0   -3.07    2.13
 -15   1   0    0.36    1.07
 -15   1   0   -0.25    1.61
  17  -1   0    1.90    2.38
  17  -1   0    2.44    2.00
  17  -1   0    2.33    2.72
 -17  -1   0    1.52    1.28
 -17  -1   0    2.06    1.24
 -17  -1   0   -0.81    3.27
  17  -1   0    0.09    1.90
  17  -1   0    3.66    2.81
 -17  -1   0    2.38    1.77
 -17  -1   0    1.45    1.82
  17  -1   0    1.92    1.25
 -17  -1   0    1.34    2.34
 -17  -1   0    0.40    4.07
  17  -1   0    1.08    1.26
 -17  -1   0    1.54    2.03
 -17   1   0    0.55    1.11
 -17   1   0   -2.41    3.24
 -17   1   0   -1.05    2.33
  17   1   0    1.69    2.31
 -17   1   0    2.09    1.40
 -17   1   0    2.71    3.50
  17   1   0    2.92    3.13
  17   1   0    1.54    1.32
 -17   1   0    4.75    2.32
 -17   1   0    1.00    1.68
  17   1   0   -0.07    1.17
  17   1   0    1.11    2.55
  17   1   0    3.27    1.98
  17   1   0    0.88    1.29
  17   1   0    1.12    1.89
 -17   1   0   -1.57    2.04
 -17   1   0    1.81    1.74
   0  -2   0   29.70    2.42
   0  -2   0   29.33    2.42
   0  -2   0   29.72    2.42
   0  -2   0   29.15    2.43
   0  -2   0   28.18    2.42
   0  -2   0   28.87    2.42
   0   2   0   27.69    2.42
   0   2   0   28.75    2.42
   0   2   0   29.43    2.42
   0   2   0   27.30    2.42
  -2  -2   0    1.73    0.23
  -2  -2   0    1.55    0.21
  -2  -2   0    1.32    0.22
   2  -2   0    1.62    0.22
   2  -2   0    1.21    0.22
  -2  -2   0    0.75    0.20
   2  -2   0    1.51    0.20
   2  -2   0    1.24    0.22
   2  -2   0    0.93    0.19
   2  -2   0    1.75    0.23
  -2  -2   0    1.40    0.23
  -2  -2   0    1.37    0.22
  -2  -2   0    1.30    0.20
   2  -2   0    1.03    0.19
  -2  -2   0    1.27    0.23
  -2  -2   0    1.69    0.21
   2  -2   0    1.59    0.22
  -2  -2   0    1.38    0.21
   2  -2   0    2.30    0.27
   2  -2   0    1.72    0.21
   2   2   0    0.87    0.20
  -2   2   0    1.19    0.22
   2   2   0    2.38    0.22
  -2   2   0    1.76    0.23
   2   2   0    1.62    0.22
  -2   2   0    1.66    0.20
  -2   2   0    1.13    0.21
   2   2   0    1.45    0.22
  -2   2   0    1.40    0.21
   2   2   0    1.69    0.21
  -2   2   0    1.57    0.22
   2   2   0    1.56    0.21
   2   2   0    1.11    0.20
  -2   2   0    1.19    0.19
   2   2   0    1.64    0.21
  -2   2   0    1.32    0.24
   2   2   0    1.79    0.26
  -2   2   0    1.56    0.24
   2   2   0    1.54    0.23
  -4  -2   0  331.38   28.22
   4  -2   0  326.21   28.23
   4  -2   0  333.39   28.22
   4  -2   0  353.25   28.23
   4  -2   0  336.60   28.23
  -4  -2   0  344.55   28.23
   4  -2   0  332.67   28.21
  -4  -2   0  341.86   28.23
  -4  -2   0  357.35   28.22
  -4  -2   0  337.55   28.23
   4  -2   0  359.71   28.22
  -4  -2   0  342.55   28.23
   4  -2   0  340.20   28.23
  -4  -2   0  341.36   28.23
  -4  -2   0  334.30   28.22
   4  -2   0  339.63   28.23
   4  -2   0  363.08   28.22
  -4  -2   0  336.88   28.23
  -4   2   0  342.30   28.23
   4   2   0  331.21   28.22
   4   2   0  356.93   28.22
   4   2   0  353.99   28.22
  -4   2   0  327.30   28.23
   4   2   0  346.08   28.23
  -4   2   0  330.40   28.22
  -4   2   0  340.16   28.23
   4   2   0  326.66   28.23
   4   2   0  344.08   28.22
  -4   2   0  323.39   28.22
  -4   2   0  330.14   28.22
   4   2   0  336.18   28.22
   4   2   0  343.70   28.23
   4   2   0  335.17   28.22
  -4   2   0  339.54   28.22
  -4   2   0  339.10   28.23
   4   2   0  334.54   28.22
  -4   2   0  338.46   28.22
  -4   2   0  332.64   28.22
   6  -2   0   68.30    5.63
   6  -2   0   65.44    5.61
  -6  -2   0   64.96    5.63
   6  -2   0   65.10    5.64
  -6  -2   0   66.66    5.61
  -6  -2   0   66.73    5.63
  -6  -2   0   72.22    5.62
  -6  -2   0   64.18    5.61
   6  -2   0   65.62    5.63
  -6  -2   0   64.76    5.62
   6  -2   0   68.35    5.62
  -6  -2   0   67.83    5.65
   6  -2   0   66.38    5.63
   6  -2   0   72.31    5.63
  -6  -2   0   66.92    5.62
   6  -2   0   68.30    5.60
  -6  -2   0   68.15    5.63
   6  -2   0   69.96    5.62
  -6   2   0   65.22    5.60
  -6   2   0   65.46    5.63
  -6   2   0   62.31    5.61
  -6   2   0   63.34    5.62
   6   2   0   69.67    5.62
  -6   2   0   72.02    5.65
  -6   2   0   62.43    5.61
  -6   2   0   63.86    5.62
   6   2   0   65.00    5.61
   6   2   0   72.02    5.63
  -6   2   0   65.01    5.62
   6   2   0   68.39    5.64
   6   2   0   62.24    5.64
  -6   2   0   64.99    5.62
  -6   2   0   70.24    5.63
   6   2   0   69.99    5.61
   6   2   0   70.21    5.62
  -6   2   0   68.91    5.64
   6   2   0   66.38    5.63
   6   2   0   65.19    5.61
   6   2   0   69.33    5.62
  -8  -2   0   23.98    2.02
   8  -2   0   21.41    2.11
  -8  -2   0   22.03    2.09
  -8  -2   0   19.44    2.11
  -8  -2   0   29.05    2.08
   8  -2   0   23.20    2.06
  -8  -2   0   24.60    2.08
  -8  -2   0   21.70    2.06
   8  -2   0   23.30    2.05
   8  -2   0   21.23    2.09
  -8  -2   0   22.57    2.15
   8  -2   0   20.45    2.06
   8  -2   0   24.45    2.00
   8  -2   0   22.04    2.02
   8  -2   0   24.17    2.00
  -8  -2   0   22.61    2.01
  -8  -2   0   23.62    2.05
  -8  -2   0   24.24    2.08
   8  -2   0   22.66    2.04
   8   2   0   23.80    2.01
  -8   2   0   25.53    2.08
  -8   2   0   21.07    2.06
   8   2   0   23.57    2.02
  -8   2   0   21.92    2.06
  -8   2   0   22.50    2.10
  -8   2   0   20.78    2.05
  -8   2   0   23.23    2.03
   8   2   0   22.67    2.03
  -8   2   0   22.41    2.03
   8   2   0   22.74    2.12
   8   2   0   23.46    2.07
   8   2   0   23.74    2.11
  -8   2   0   22.37    1.99
   8   2   0   24.96    2.03
  -8   2   0   23.23    2.15
   8   2   0   21.15    2.05
   8   2   0   22.93    2.07
  -8   2   0   25.24    2.05
  -8   2   0   26.48    2.12
   8   2   0   22.18    2.02
  10  -2   0    1.66    0.82
 -10  -2   0    2.09    0.53
  10  -2   0    2.42    0.73
  10  -2   0    2.66    0.78
  10  -2   0    2.98    0.55
  10  -2   0    3.56    0.56
 -10  -2   0    3.03    0.79
  10  -2   0    1.90    0.87
 -10  -2   0    1.85    1.01
 -10  -2   0    3.49    0.76
 -10  -2   0    2.92    0.79
 -10  -2   0    3.01    0.69
  10  -2   0    2.63    0.69
  10  -2   0    3.23    0.76
 -10  -2   0    2.30    0.76
 -10  -2   0    5.03    0.98
  10  -2   0    2.24    0.71
 -10  -2   0    2.23    0.84
 -10  -2   0    3.14    0.60
  10   2   0    3.55    0.70
  10   2   0    2.84    0.53
  10   2   0    1.90    0.55
  10   2   0    1.99    0.58
  10   2   0    3.84    0.78
 -10   2   0    2.58    0.72
  10   2   0    2.27    0.82
  10   2   0    3.15    0.73
 -10   2   0    2.32    0.76
 -10   2   0    3.33    0.66
 -10   2   0    2.04    0.50
  10   2   0    3.16    0.74
 -10   2   0    1.08    0.66
 -10   2   0    3.33    0.95
 -10   2   0    1.66    0.73
 -10   2   0    2.15    0.62
 -10   2   0    1.90    0.65
  10   2   0    1.64    0.84
 -10   2   0    3.73    0.79
  10   2   0    3.59    0.71
 -10   2   0    4.61    1.01
  12  -2   0    1.63    0.99
  12  -2   0    2.84    0.96
 -12  -2   0    0.76    1.10
  12  -2   0    1.27    0.88
 -12  -2   0    1.88    0.96
  12  -2   0    1.85    0.66
 -12  -2   0    1.33    0.64
 -12  -2   0    1.23    1.41
  12  -2   0    2.20    1.16
 -12  -2   0    2.01    0.70
 -12  -2   0    2.22    0.95
 -12  -2   0    1.67    1.45
 -12  -2   0    1.99    0.88
  12  -2   0    2.19    0.68
 -12  -2   0    1.99    0.97
 -12  -2   0    0.82    1.06
  12   2   0    1.98    0.98
 -12   2   0    2.03    1.38
  12   2   0    3.63    0.98
 -12   2   0   -0.26    1.23
 -12   2   0    1.66    0.80
  12   2   0    3.35    0.99
  12   2   0    1.44    0.73
 -12   2   0    0.84    0.88
 -12   2   0    2.54    1.06
  12   2   0    2.01    1.14
 -12   2   0    2.78    1.00
 -12   2   0    2.87    1.12
 -12   2   0    2.68    1.12
 -12   2   0    3.30    0.60
  12   2   0    1.71    0.65
  12   2   0    2.53    1.12
  12   2   0    1.30    0.91
  12   2   0    1.24    0.67
 -12   2   0    2.17    0.82
  12   2   0    2.25    0.99
 -12   2   0    3.63    0.95
 -14  -2   0    4.98    1.40
 -14  -2   0    7.15    2.09
  14  -2   0    8.55    1.05
 -14  -2   0    5.11    1.61
  14  -2   0    6.41    1.39
 -14  -2   0    5.94    1.48
 -14  -2   0    6.18    1.73
  14  -2   0    8.19    1.54
 -14  -2   0    5.41    1.05
  14  -2   0    9.99    1.44
 -14  -2   0    5.28    1.97
  14  -2   0    2.78    1.69
  14  -2   0    2.84    1.20
 -14  -2   0    4.79    1.00
  14  -2   0    8.82    1.58
  14  -2   0    5.40    1.07
 -14  -2   0    7.39    1.42
 -14  -2   0    5.58    1.29
 -14   2   0    6.42    1.70
  14   2   0    8.85    1.43
  14   2   0    5.22    0.96
 -14   2   0    5.41    0.90
 -14   2   0    4.24    1.21
  14   2   0    3.81    1.36
  14   2   0    9.02    1.62
 -14   2   0    6.51    1.61
 -14   2   0    6.48    1.94
 -14   2   0    5.08    1.40
  14   2   0    8.66    1.08
  14   2   0    7.69    1.92
  14   2   0    5.94    1.07
 -14   2   0    6.50    1.57
 -14   2   0    4.23    2.04
 -14   2   0    5.85    1.31
  14   2   0    7.14    1.51
 -16  -2   0    2.96    2.67
  16  -2   0    0.03    1.65
  16  -2   0    0.46    2.40
  16  -2   0    0.77    1.92
 -16  -2   0    0.88    1.59
  16  -2   0   -1.74    2.10
 -16  -2   0    0.88    1.13
  16  -2   0   -0.30    1.14
 -16  -2   0    0.32    1.88
  16  -2   0    0.61    1.65
 -16  -2   0    0.53    2.60
 -16  -2   0   -0.90    1.67
 -16  -2   0   -0.30    1.13
 -16  -2   0   -1.62    2.06
  16  -2   0   -0.87    1.32
 -16  -2   0    0.50    1.55
  16   2   0   -0.58    1.12
 -16   2   0   -0.46    0.97
  16   2   0    0.23    2.26
  16   2   0   -0.43    1.90
 -16   2   0    0.62    3.13
 -16   2   0    0.98    1.82
  16   2   0    0.35    1.03
 -16   2   0    1.26    1.48
 -16   2   0    1.71    3.39
 -16   2   0    0.05    1.23
 -16   2   0    0.34    1.51
 -16   2   0    1.40    2.84
  16   2   0    1.31    2.49
  16   2   0   -0.21    1.65
 -16   2   0    0.33    1.59
 -16   2   0    0.56    2.85
 -16   2   0   -0.51    1.84
  16   2   0    0.09    1.12
  16   2   0   -0.50    1.71
   1  -3   0  338.81   28.39
   1  -3   0  350.38   28.39
   1  -3   0  337.09   28.39
  -1  -3   0  335.40   28.39
  -1  -3   0  353.89   28.40
  -1  -3   0  345.67   28.39
   1  -3   0  339.02   28.40
  -1  -3   0  350.47   28.39
  -1  -3   0  352.02   28.39
  -1  -3   0  348.23   28.39
   1  -3   0  334.38   28.39
  -1  -3   0  324.52   28.39
  -1  -3   0  347.04   28.39
  -1  -3   0  351.91   28.40
  -1  -3   0  355.54   28.39
   1  -3   0  332.90   28.40
   1  -3   0  340.04   28.39
   1  -3   0  329.33   28.40
   1  -3   0  350.76   28.39
   1   3   0  341.17   28.39
   1   3   0  345.51   28.40
   1   3   0  341.43   28.40
   1   3   0  352.57   28.39
   1   3   0  339.19   28.39
   1   3   0  338.35   28.39
   1   3   0  344.01   28.39
  -1   3   0  333.87   28.39
  -1   3   0  333.06   28.39
  -1   3   0  352.69   28.40
  -1   3   0  327.97   28.39
  -1   3   0  342.28   28.39
   1   3   0  335.04   28.39
   1   3   0  345.41   28.39
  -1   3   0  323.58   28.39
   1   3   0  338.39   28.39
  -1   3   0  342.95   28.40
  -1   3   0  359.98   28.40
  -1   3   0  338.38   28.39
   3  -3   0  205.70   16.92
  -3  -3   0  207.96   16.91
   3  -3   0  199.20   16.91
   3  -3   0  202.25   16.92
  -3  -3   0  202.36   16.91
  -3  -3   0  202.80   16.92
  -3  -3   0  203.13   16.92
   3  -3   0  198.56   16.90
   3  -3   0  199.95   16.91
   3  -3   0  208.53   16.92
  -3  -3   0  197.74   16.91
   3  -3   0  210.59   16.91
  -3  -3   0  199.01   16.91
  -3  -3   0  206.12   16.92
   3  -3   0  209.65   16.91
   3  -3   0  198.84   16.92
   3  -3   0  206.20   16.91
  -3  -3   0  204.28   16.91
  -3  -3   0  202.35   16.91
  -3  -3   0  205.38   16.91
   3   3   0  205.50   16.91
  -3   3   0  204.43   16.91
  -3   3   0  204.36   16.92
   3   3   0  203.87   16.91
   3   3   0  211.76   16.91
   3   3   0  200.85   16.91
   3   3   0  203.35   16.91
  -3   3   0  203.07   16.92
  -3   3   0  204.28   16.91
   3   3   0  207.37   16.92
   3   3   0  198.04   16.92
   3   3   0  198.51   16.91
   3   3   0  193.38   16.91
  -3   3   0  197.54   16.92
  -3   3   0  195.46   16.92
  -3   3   0  204.37   16.91
  -3   3   0  204.66   16.91
  -3   3   0  205.12   16.92
   5  -3   0    5.11    0.60
  -5  -3   0    4.38    0.59
  -5  -3   0    6.30    0.58
  -5  -3   0    5.73    0.61
   5  -3   0    4.94    0.58
  -5  -3   0    5.63    0.58
  -5  -3   0    3.62    0.56
   5  -3   0    4.87    0.61
   5  -3   0    4.67    0.60
   5  -3   0    6.13    0.57
   5  -3   0    5.16    0.59
  -5  -3   0    4.84    0.62
  -5  -3   0    5.66    0.59
  -5  -3   0    5.72    0.64
   5  -3   0    4.70    0.57
   5  -3   0    5.02    0.61
  -5  -3   0    5.98    0.59
   5   3   0    5.69    0.59
  -5   3   0    5.79    0.68
  -5   3   0    4.68    0.57
   5   3   0    5.43    0.62
   5   3   0    5.20    0.60
   5   3   0    5.38    0.67
   5   3   0    5.26    0.57
   5   3   0    4.70    0.56
  -5   3   0    5.27    0.59
   5   3   0    5.37    0.58
   5   3   0    6.70    0.59
  -5   3   0    5.19    0.57
  -5   3   0    5.45    0.58
  -5   3   0    5.31    0.56
   5   3   0    5.41    0.65
  -5   3   0    4.96    0.62
  -5   3   0    4.63    0.56
  -5   3   0    7.17    0.64
   5   3   0    5.71    0.63
  -5   3   0    5.36    0.64
   7  -3   0   16.30    1.61
  -7  -3   0   19.66    1.70
  -7  -3   0   16.75    1.61
  -7  -3   0   20.57    1.60
  -7  -3   0   17.93    1.62
   7  -3   0   18.00    1.55
  -7  -3   0   16.44    1.59
  -7  -3   0   18.01    1.56
   7  -3   0   17.27    1.60
   7  -3   0   15.49    1.63
  -7  -3   0   19.12    1.57
   7  -3   0   18.48    1.62
  -7  -3   0   15.39    1.60
   7  -3   0   17.30    1.55
  -7  -3   0   15.78    1.59
   7  -3   0   18.39    1.61
   7  -3   0   18.92    1.61
   7  -3   0   17.64    1.58
   7   3   0   18.74    1.66
  -7   3   0   16.44    1.55
  -7   3   0   16.72    1.66
  -7   3   0   15.84    1.58
   7   3   0   16.90    1.62
   7   3   0   16.39    1.56
  -7   3   0   17.19    1.65
  -7   3   0   18.83    1.58
  -7   3   0   16.83    1.60
   7   3   0   18.69    1.64
  -7   3   0   18.37    1.61
   7   3   0   18.37    1.58
   7   3   0   19.92    1.58
  -7   3   0   17.54    1.68
   7   3   0   18.29    1.61
   7   3   0   16.56    1.62
   7   3   0   15.53    1.60
  -7   3   0   18.84    1.62
  -7   3   0   18.07    1.61
   7   3   0   17.70    1.56
   9  -3   0   42.64    3.52
   9  -3   0   44.09    3.50
  -9  -3   0   41.17    3.56
   9  -3   0   39.47    3.44
  -9  -3   0   39.72    3.46
  -9  -3   0   37.41    3.45
  -9  -3   0   41.31    3.51
  -9  -3   0   42.73    3.57
  -9  -3   0   40.54    3.51
  -9  -3   0   37.91    3.54
   9  -3   0   37.44    3.51
   9  -3   0   42.54    3.53
   9  -3   0   41.54    3.45
   9  -3   0   37.87    3.51
  -9  -3   0   44.59    3.61
  -9  -3   0   39.65    3.51
   9  -3   0   43.43    3.56
  -9  -3   0   41.54    3.52
   9  -3   0   40.21    3.56
  -9   3   0   37.30    3.47
  -9   3   0   36.38    3.48
  -9   3   0   42.24    3.51
  -9   3   0   44.69    3.50
  -9   3   0   39.55    3.44
   9   3   0   42.35    3.53
   9   3   0   39.48    3.52
   9   3   0   34.90    3.47
   9   3   0   40.72    3.46
   9   3   0   40.42    3.51
   9   3   0   42.78    3.48
  -9   3   0   40.11    3.59
  -9   3   0   43.10    3.53
   9   3   0   42.49    3.57
   9   3   0   36.19    3.46
  -9   3   0   40.64    3.52
  -9   3   0   46.04    3.51
  -9   3   0   43.85    3.51
   9   3   0   36.77    3.54
   9   3   0   40.83    3.52
  -9   3   0   39.45    3.50
 -11  -3   0   11.43    1.47
 -11  -3   0   11.62    1.48
 -11  -3   0   14.01    1.33
  11  -3   0   12.75    1.52
  11  -3   0   12.27    1.44
  11  -3   0   12.54    1.34
 -11  -3   0   13.59    1.55
 -11  -3   0    9.79    1.36
  11  -3   0   14.34    1.50
 -11  -3   0   12.01    1.70
 -11  -3   0   11.18    1.40
 -11  -3   0   13.14    1.49
  11  -3   0   10.95    1.55
  11  -3   0   10.87    1.31
  11  -3   0   16.55    1.48
  11  -3   0   10.79    1.52
 -11  -3   0   14.35    1.33
  11  -3   0   12.40    1.49
 -11  -3   0   14.49    1.66
 -11   3   0   12.41    2.31
  11   3   0   13.25    1.32
 -11   3   0   12.28    1.49
 -11   3   0    9.42    1.39
 -11   3   0   14.00    1.50
 -11   3   0   13.88    1.47
 -11   3   0   13.12    1.80
  11   3   0   12.79    1.33
  11   3   0   10.47    1.57
  11   3   0   14.24    1.53
 -11   3   0   11.38    1.45
 -11   3   0   13.57    1.41
  11   3   0   13.68    1.54
 -11   3   0   12.34    1.42
  11   3   0   15.82    1.53
 -11   3   0   12.49    1.26
  11   3   0   11.89    1.44
  11   3   0   12.96    1.48
 -11   3   0    9.69    1.64
  11   3   0   10.17    1.27
 -13  -3   0    2.98    0.87
  13  -3   0    4.37    1.42
  13  -3   0    3.60    1.48
 -13  -3   0    6.80    1.68
  13  -3   0    8.33    1.35
  13  -3   0    5.09    1.17
  13  -3   0    4.87    0.85
 -13  -3   0    2.81    1.39
 -13  -3   0    4.29    0.87
  13  -3   0    5.06    1.26
 -13  -3   0    3.64    1.09
 -13  -3   0    4.18    1.23
 -13  -3   0    2.99    1.19
 -13  -3   0    3.32    1.25
 -13  -3   0    5.79    1.77
  13  -3   0    4.20    0.90
 -13  -3   0    4.66    1.46
  13   3   0    5.47    0.91
 -13   3   0    5.75    1.40
 -13   3   0    3.65    1.68
  13   3   0    8.08    1.26
  13   3   0    3.84    0.86
 -13   3   0    3.75    1.34
 -13   3   0    3.05    1.01
 -13   3   0    1.69    1.16
 -13   3   0    3.32    1.05
 -13   3   0    5.17    1.17
  13   3   0    7.91    1.29
 -13   3   0    4.12    0.83
  13   3   0    2.25    1.24
  13   3   0    5.67    1.44
 -13   3   0    5.08    1.44
 -13   3   0    3.60    1.07
 -13   3   0    6.66    1.96
  13   3   0    5.91    1.37
 -15  -3   0    3.65    1.46
 -15  -3   0    1.75    1.48
 -15  -3   0    2.95    1.63
  15  -3   0    4.46    2.11
 -15  -3   0    1.49    1.03
 -15  -3   0    3.10    1.43
  15  -3   0    1.29    1.55
 -15  -3   0    1.30    2.32
  15  -3   0    1.70    1.72
  15  -3   0    7.03    1.57
  15  -3   0    3.27    1.09
  15  -3   0    5.74    1.85
  15  -3   0    1.07    0.96
 -15  -3   0    1.84    1.03
 -15  -3   0    1.14    1.53
 -15  -3   0    1.71    2.45
  15   3   0    1.30    1.47
 -15   3   0    2.05    1.29
 -15   3   0    1.38    2.36
  15   3   0    4.78    2.20
  15   3   0    0.98    1.51
  15   3   0    3.93    1.69
  15   3   0    2.08    1.06
 -15   3   0    1.97    1.90
 -15   3   0    2.46    1.30
 -15   3   0    3.35    1.54
 -15   3   0    2.58    1.78
  15   3   0    3.45    1.01
 -15   3   0    5.45    1.77
 -15   3   0    1.45    1.44
 -15   3   0    4.09    2.47
 -15   3   0    0.98    1.34
 -15   3   0    2.54    0.85
   0  -4   0  116.22    9.71
   0  -4   0  113.07    9.70
   0  -4   0  126.19    9.72
   0  -4   0  115.79    9.72
   0  -4   0  111.10    9.70
   0  -4   0  116.17    9.71
   0  -4   0  113.22    9.71
   0  -4   0  114.68    9.72
   0  -4   0  118.98    9.71
   0   4   0  119.12    9.71
   0   4   0  114.99    9.72
   0   4   0  117.13    9.72
   0   4   0  122.85    9.71
   0   4   0  117.34    9.71
   0   4   0  117.25    9.71
   0   4   0  114.51    9.71
   0   4   0  117.97    9.71
   0   4   0  112.96    9.70
  -2  -4   0  749.02   61.01
   2  -4   0  765.11   61.01
  -2  -4   0  734.76   61.01
   2  -4   0  728.57   61.01
  -2  -4   0  719.14   61.01
  -2  -4   0  730.31   61.02
  -2  -4   0  751.36   61.01
   2  -4   0  713.58   61.01
   2  -4   0  733.15   61.02
  -2  -4   0  731.78   61.01
  -2  -4   0  731.22   61.02
  -2  -4   0  744.73   61.02
   2  -4   0  741.75   61.02
   2  -4   0  732.45   61.01
   2  -4   0  743.83   61.02
  -2  -4   0  730.98   61.01
   2   4   0  738.43   61.01
  -2   4   0  751.17   61.02
   2   4   0  732.28   61.01
  -2   4   0  706.16   61.01
   2   4   0  766.27   61.01
   2   4   0  729.48   61.01
  -2   4   0  730.56   61.02
  -2   4   0  722.15   61.01
   2   4   0  748.56   61.02
   2   4   0  742.84   61.02
  -2   4   0  718.96   61.02
   2   4   0  739.60   61.01
   2   4   0  704.66   61.01
  -4  -4   0  175.39   14.82
  -4  -4   0  179.15   14.82
   4  -4   0  175.30   14.82
   4  -4   0  181.14   14.83
   4  -4   0  182.30   14.82
  -4  -4   0  180.14   14.83
  -4  -4   0  175.39   14.82
  -4  -4   0  176.62   14.81
  -4  -4   0  184.00   14.82
   4  -4   0  174.99   14.81
  -4  -4   0  180.51   14.82
   4  -4   0  182.65   14.82
  -4  -4   0  174.08   14.81
  -4  -4   0  174.20   14.81
   4  -4   0  177.32   14.81
   4  -4   0  174.55   14.83
  -4  -4   0  174.19   14.83
   4  -4   0  177.31   14.82
   4  -4   0  178.71   14.83
   4  -4   0  170.03   14.82
   4   4   0  188.57   14.82
   4   4   0  177.18   14.83
  -4   4   0  179.52   14.82
  -4   4   0  175.66   14.83
   4   4   0  175.01   14.82
  -4   4   0  173.04   14.81
  -4   4   0  184.48   14.82
   4   4   0  178.11   14.82
  -4   4   0  177.20   14.83
   4   4   0  184.83   14.82
  -4   4   0  176.05   14.81
  -4   4   0  178.06   14.82
  -4   4   0  185.93   14.82
  -4   4   0  178.48   14.82
   4   4   0  182.29   14.81
   4   4   0  172.75   14.81
   4   4   0  177.94   14.83
   4   4   0  172.03   14.81
   6  -4   0   29.69    2.40
   6  -4   0   31.15    2.43
  -6  -4   0   28.68    2.41
   6  -4   0   27.53    2.44
   6  -4   0   29.00    2.44
  -6  -4   0   25.96    2.43
  -6  -4   0   28.24    2.45
  -6  -4   0   30.50    2.50
   6  -4   0   29.76    2.43
   6  -4   0   29.97    2.44
   6  -4   0   25.98    2.40
  -6  -4   0   31.21    2.47
  -6  -4   0   24.86    2.40
  -6  -4   0   24.93    2.43
  -6  -4   0   26.85    2.43
   6  -4   0   27.23    2.43
  -6  -4   0   28.69    2.44
   6   4   0   26.12    2.41
  -6   4   0   28.02    2.46
  -6   4   0   26.50    2.43
  -6   4   0   29.41    2.41
   6   4   0   27.88    2.40
  -6   4   0   27.69    2.41
  -6   4   0   28.07    2.41
   6   4   0   28.50    2.47
  -6   4   0   30.83    2.43
   6   4   0   26.71    2.40
   6   4   0   27.49    2.42
   6   4   0   24.84    2.41
   6   4   0   26.64    2.43
  -6   4   0   27.15    2.46
   6   4   0   30.04    2.45
  -6   4   0   30.32    2.44
   6   4   0   26.91    2.43
  -6   4   0   26.73    2.47
   6   4   0   30.20    2.47
  -6   4   0   30.86    2.44
  -8  -4   0  128.35   10.69
   8  -4   0  143.20   10.72
  -8  -4   0  130.60   10.71
   8  -4   0  125.44   10.70
   8  -4   0  131.54   10.72
  -8  -4   0  125.42   10.69
  -8  -4   0  124.00   10.71
   8  -4   0  129.55   10.70
  -8  -4   0  123.69   10.67
  -8  -4   0  125.40   10.69
   8  -4   0  124.20   10.69
  -8  -4   0  123.34   10.68
   8  -4   0  127.94   10.66
   8  -4   0  135.77   10.69
   8  -4   0  121.42   10.66
  -8  -4   0  128.69   10.72
  -8  -4   0  128.35   10.67
  -8   4   0  133.49   10.68
   8   4   0  127.96   10.71
   8   4   0  132.66   10.67
  -8   4   0  128.52   10.68
  -8   4   0  124.71   10.71
   8   4   0  128.30   10.69
   8   4   0  126.72   10.71
   8   4   0  130.42   10.69
   8   4   0  128.30   10.67
  -8   4   0  120.97   10.67
  -8   4   0  136.83   10.71
  -8   4   0  132.52   10.71
  -8   4   0  126.70   10.68
  -8   4   0  126.41   10.72
  -8   4   0  118.13   10.68
   8   4   0  131.20   10.69
   8   4   0  118.92   10.69
   8   4   0  124.76   10.66
  10  -4   0   10.94    1.24
 -10  -4   0    9.95    1.16
 -10  -4   0    9.20    1.20
  10  -4   0   10.79    1.26
  10  -4   0    9.80    1.22
  10  -4   0   12.64    1.28
 -10  -4   0   10.25    1.38
  10  -4   0   10.71    1.27
  10  -4   0   11.82    1.35
 -10  -4   0   12.61    1.47
 -10  -4   0   10.12    1.20
  10  -4   0    9.68    1.13
 -10  -4   0    8.87    1.19
 -10  -4   0    9.87    1.13
  10  -4   0   12.00    1.15
  10  -4   0   10.91    1.29
 -10  -4   0   10.67    1.29
 -10  -4   0   11.13    1.27
  10   4   0    8.70    1.16
 -10   4   0    7.86    1.22
  10   4   0   11.55    1.31
 -10   4   0   10.25    1.15
 -10   4   0   10.49    1.25
  10   4   0    8.41    1.26
 -10   4   0   10.45    1.08
 -10   4   0    9.61    1.41
 -10   4   0   12.12    1.45
  10   4   0   13.15    1.31
  10   4   0   10.18    1.11
 -10   4   0   10.96    1.24
  10   4   0   10.56    1.18
 -10   4   0   11.00    1.17
  10   4   0    9.71    1.37
  10   4   0   11.24    1.17
 -10   4   0    7.43    1.12
 -10   4   0   13.18    1.34
  10   4   0    9.67    1.13
 -10   4   0   10.24    1.25
  10   4   0   13.01    1.29
  12  -4   0   18.14    1.97
 -12  -4   0   18.95    1.94
 -12  -4   0   19.85    2.09
 -12  -4   0   19.31    2.07
  12  -4   0   16.10    1.87
 -12  -4   0   17.99    1.86
 -12  -4   0   11.40    1.75
  12  -4   0   17.59    1.69
 -12  -4   0   14.80    1.92
  12  -4   0   16.21    1.71
 -12  -4   0   17.33    1.71
  12  -4   0   15.12    1.90
  12  -4   0   18.66    1.88
  12  -4   0   15.77    1.85
 -12  -4   0   19.18    1.96
 -12  -4   0   16.89    1.71
  12  -4   0   14.11    1.84
 -12   4   0   14.55    2.09
 -12   4   0   16.54    1.61
  12   4   0   14.94    1.67
 -12   4   0   16.05    1.84
 -12   4   0   18.66    1.81
 -12   4   0   18.75    1.91
 -12   4   0   16.10    1.83
  12   4   0   13.32    1.78
  12   4   0   17.05    1.92
 -12   4   0   16.05    1.76
  12   4   0   19.35    1.92
  12   4   0   14.57    1.80
  12   4   0   17.18    1.98
  12   4   0   17.34    1.71
 -12   4   0   20.31    2.00
  12   4   0   16.43    1.89
 -12   4   0   16.65    1.89
 -12   4   0   16.34    1.89
  12   4   0   15.88    1.82
  12   4   0   15.11    1.72
 -12   4   0   18.72    1.87
 -14  -4   0   22.82    2.60
  14  -4   0   23.16    2.74
 -14  -4   0   20.39    3.04
 -14  -4   0   24.52    2.36
  14  -4   0   29.88    2.89
  14  -4   0   20.99    2.35
 -14  -4   0   25.43    2.93
 -14  -4   0   27.28    2.82
 -14  -4   0   25.76    2.68
  14  -4   0   25.36    2.71
 -14  -4   0   24.70    2.80
 -14  -4   0   22.75    2.82
  14  -4   0   31.45    2.90
  14  -4   0   24.78    2.75
 -14  -4   0   26.46    2.43
 -14  -4   0   28.69    2.63
  14  -4   0   20.28    2.82
 -14   4   0   18.98    2.68
 -14   4   0   21.09    2.82
 -14   4   0   27.43    2.99
 -14   4   0   30.50    3.03
 -14   4   0   24.76    2.60
 -14   4   0   21.78    2.24
  14   4   0   25.96    2.77
 -14   4   0   22.40    2.62
  14   4   0   24.60    2.88
  14   4   0   27.64    2.95
  14   4   0   21.75    2.64
 -14   4   0   28.24    2.56
  14   4   0   28.62    2.66
  14   4   0   20.90    2.38
 -14   4   0   26.04    2.66
  14   4   0   23.43    2.33
  14   4   0   23.51    2.38
  14   4   0   22.21    2.70
 -14   4   0   17.83    2.63
 -14   4   0   21.77    3.01
 -16  -4   0    1.33    1.69
 -16  -4   0    3.56    2.87
 -16  -4   0    0.57    2.50
 -16  -4   0    2.06    1.66
 -16  -4   0    0.16    1.28
 -16  -4   0    4.24    3.07
 -16  -4   0    1.13    1.15
  16  -4   0    2.79    1.82
  16  -4   0   -0.14    1.79
 -16  -4   0    0.42    2.16
  16  -4   0    2.05    2.30
  16  -4   0    2.51    1.33
  16  -4   0    3.58    2.50
  16  -4   0    0.96    1.30
  16  -4   0    1.43    2.04
 -16  -4   0    3.25    1.88
 -16   4   0    4.09    3.09
 -16   4   0    1.83    1.70
  16   4   0    2.00    1.25
 -16   4   0    4.70    3.41
 -16   4   0    1.95    0.93
  16   4   0    2.97    1.87
  16   4   0    3.17    1.79
  16   4   0    4.21    1.07
 -16   4   0    3.91    2.14
 -16   4   0    3.82    1.67
  16   4   0    1.42    1.35
 -16   4   0    1.96    1.50
  16   4   0    1.59    2.77
 -16   4   0    4.73    2.49
 -16   4   0    2.96    1.67
 -16   4   0    1.71    1.53
  16   4   0    0.82    1.80
  -1  -5   0   10.26    0.96
   1  -5   0   10.04    0.97
  -1  -5   0   10.71    0.96
   1  -5   0   11.30    0.96
   1  -5   0   11.34    0.99
  -1  -5   0    9.86    0.99
  -1  -5   0   11.52    1.01
  -1  -5   0   11.27    1.01
  -1  -5   0   10.73    0.96
   1  -5   0   12.31    0.98
   1  -5   0    9.81    0.95
  -1  -5   0   11.53    0.96
   1  -5   0   11.53    1.00
   1  -5   0   11.70    1.00
  -1  -5   0   10.38    0.98
   1  -5   0   12.39    0.98
   1  -5   0   10.31    0.95
  -1  -5   0   10.48    0.97
  -1   5   0   10.12    0.97
   1   5   0   10.90    0.97
  -1   5   0   12.23    1.00
  -1   5   0   11.22    0.95
   1   5   0    9.87    0.95
   1   5   0   10.74    0.98
  -1   5   0    9.50    0.98
  -1   5   0    9.33    0.96
   1   5   0    9.23    0.97
  -1   5   0   10.99    0.96
   1   5   0   11.14    0.94
  -1   5   0   10.53    0.95
   1   5   0   10.97    0.97
   1   5   0    9.73    0.99
  -1   5   0   11.15    0.93
  -1   5   0   10.16    0.97
   1   5   0   10.03    0.99
   1   5   0   10.95    0.96
   1   5   0   10.24    0.94
  -1   5   0    9.24    0.98
  -3  -5   0  371.13   32.36
   3  -5   0  390.60   32.37
   3  -5   0  411.28   32.37
  -3  -5   0  378.19   32.36
  -3  -5   0  410.01   32.37
   3  -5   0  391.21   32.36
   3  -5   0  399.61   32.35
  -3  -5   0  395.84   32.36
  -3  -5   0  394.75   32.36
  -3  -5   0  368.56   32.36
   3  -5   0  389.69   32.37
   3  -5   0  379.86   32.37
  -3  -5   0  388.10   32.37
  -3  -5   0  379.69   32.37
   3  -5   0  389.14   32.37
   3  -5   0  388.78   32.36
  -3  -5   0  382.89   32.36
   3  -5   0  398.02   32.36
   3  -5   0  384.22   32.37
  -3  -5   0  392.00   32.36
  -3   5   0  391.39   32.37
  -3   5   0  388.98   32.36
  -3   5   0  390.93   32.38
   3   5   0  386.42   32.37
   3   5   0  396.82   32.36
  -3   5   0  405.90   32.37
   3   5   0  388.96   32.36
   3   5   0  405.51   32.36
  -3   5   0  380.40   32.35
  -3   5   0  391.54   32.36
   3   5   0  387.55   32.36
   3   5   0  402.78   32.37
  -3   5   0  380.59   32.36
   3   5   0  369.94   32.35
  -3   5   0  386.03   32.36
   3   5   0  384.88   32.35
  -3   5   0  396.69   32.37
   3   5   0  384.81   32.37
  -5  -5   0  104.63    9.42
  -5  -5   0  116.54    9.45
  -5  -5   0  110.77    9.43
   5  -5   0  106.74    9.43
  -5  -5   0  108.02    9.45
   5  -5   0  111.49    9.42
   5  -5   0  110.27    9.41
   5  -5   0  108.62    9.42
  -5  -5   0  106.85    9.42
   5  -5   0  115.17    9.42
   5  -5   0  115.73    9.44
   5  -5   0  114.99    9.44
  -5  -5   0  117.49    9.43
  -5  -5   0  115.61    9.44
   5  -5   0  116.18    9.45
  -5  -5   0  122.65    9.43
  -5  -5   0  110.38    9.42
   5  -5   0  116.49    9.45
  -5  -5   0  113.75    9.43
   5  -5   0  106.15    9.42
  -5   5   0  111.16    9.44
  -5   5   0  112.54    9.42
  -5   5   0  113.37    9.44
   5   5   0  122.17    9.45
   5   5   0  113.58    9.42
  -5   5   0  110.82    9.42
  -5   5   0  114.24    9.43
  -5   5   0  108.89    9.42
   5   5   0  113.98    9.43
   5   5   0  114.12    9.44
  -5   5   0  109.97    9.41
   5   5   0  120.72    9.43
   5   5   0  108.52    9.42
   5   5   0  114.45    9.41
   5   5   0  118.66    9.43
  -5   5   0  113.43    9.43
   5   5   0  112.15    9.41
  -5   5   0  110.92    9.43
  -7  -5   0  237.64   20.57
  -7  -5   0  232.89   20.55
   7  -5   0  252.18   20.57
   7  -5   0  242.22   20.54
  -7  -5   0  243.21   20.57
   7  -5   0  244.31   20.58
  -7  -5   0  249.44   20.59
  -7  -5   0  239.17   20.55
  -7  -5   0  246.09   20.57
  -7  -5   0  245.17   20.59
   7  -5   0  254.41   20.56
   7  -5   0  247.32   20.58
   7  -5   0  257.48   20.57
   7  -5   0  252.26   20.55
   7  -5   0  243.08   20.58
  -7  -5   0  248.53   20.56
   7   5   0  243.24   20.56
  -7   5   0  271.48   20.68
   7   5   0  262.81   20.57
  -7   5   0  249.06   20.55
   7   5   0  247.68   20.58
   7   5   0  247.44   20.55
  -7   5   0  244.90   20.56
   7   5   0  232.41   20.54
  -7   5   0  246.77   20.58
   7   5   0  251.20   20.58
  -7   5   0  246.07   20.59
   7   5   0  246.62   20.55
   7   5   0  246.60   20.56
   7   5   0  237.89   20.56
  -7   5   0  242.60   20.57
   7   5   0  252.81   20.57
  -7   5   0  248.88   20.56
  -7   5   0  244.88   20.55
   9  -5   0   27.68    2.55
   9  -5   0   31.42    2.68
  -9  -5   0   28.19    2.58
   9  -5   0   31.26    2.62
   9  -5   0   23.69    2.62
  -9  -5   0   31.10    2.69
   9  -5   0   31.68    2.64
   9  -5   0   28.23    2.63
   9  -5   0   23.70    2.62
   9  -5   0   32.09    2.67
  -9  -5   0   28.59    2.72
  -9  -5   0   31.94    2.66
  -9  -5   0   31.18    2.65
  -9  -5   0   31.69    2.68
  -9  -5   0   32.22    2.72
  -9  -5   0   28.31    2.58
   9   5   0   26.60    2.54
  -9   5   0   29.24    2.73
  -9   5   0   31.26    2.67
   9   5   0   28.85    2.70
   9   5   0   29.25    2.59
  -9   5   0   31.20    2.62
  -9   5   0   26.86    2.73
  -9   5   0   30.09    2.57
   9   5   0   29.87    2.73
   9   5   0   30.60    2.67
  -9   5   0   30.48    2.71
   9   5   0   27.50    2.58
  -9   5   0   28.90    2.66
  -9   5   0   30.26    2.60
   9   5   0   26.45    2.64
   9   5   0   30.37    2.64
  -9   5   0   29.33    2.59
   9   5   0   30.99    2.60
 -11  -5   0    9.73    1.34
  11  -5   0    7.75    0.91
  11  -5   0    6.83    0.95
 -11  -5   0    6.11    0.94
  11  -5   0    7.37    1.16
  11  -5   0   11.54    1.25
  11  -5   0    8.64    1.24
 -11  -5   0    7.97    1.27
 -11  -5   0    8.08    1.14
  11  -5   0    5.32    1.30
 -11  -5   0    5.80    1.41
 -11  -5   0    8.67    1.58
  11  -5   0    8.02    1.20
  11  -5   0    8.72    1.36
 -11  -5   0    6.39    1.34
 -11  -5   0    5.75    1.12
 -11  -5   0    5.89    0.96
  11  -5   0    5.21    1.09
  11   5   0    8.10    1.28
  11   5   0    6.25    1.06
 -11   5   0    7.79    1.04
  11   5   0    8.67    1.17
 -11   5   0    8.79    1.05
  11   5   0    9.65    1.01
 -11   5   0    7.13    0.87
  11   5   0    8.90    1.22
  11   5   0    5.22    0.96
 -11   5   0    6.15    1.41
  11   5   0    6.63    1.12
 -11   5   0    7.69    1.10
  11   5   0    7.92    1.21
 -11   5   0    6.71    1.27
 -11   5   0   10.26    1.26
 -11   5   0    6.18    1.03
 -11   5   0    5.39    1.40
  11   5   0    8.31    0.91
 -11   5   0    5.17    1.11
 -11   5   0    5.91    1.20
  11   5   0    7.05    1.17
 -13  -5   0   -0.08    1.38
  13  -5   0    0.00    0.72
  13  -5   0    1.11    1.39
 -13  -5   0    0.84    1.22
  13  -5   0   -0.09    0.94
 -13  -5   0    0.12    0.80
 -13  -5   0    0.39    1.47
 -13  -5   0    1.17    1.15
 -13  -5   0   -1.24    0.86
 -13  -5   0    0.50    1.48
 -13  -5   0   -0.11    1.88
 -13  -5   0   -2.04    1.69
  13  -5   0   -0.44    0.86
 -13  -5   0   -0.45    1.06
  13  -5   0   -0.28    1.43
  13  -5   0    1.10    1.16
  13  -5   0    0.55    1.57
  13  -5   0   -0.76    1.36
  13  -5   0   -1.08    1.05
 -13   5   0    0.23    1.02
 -13   5   0    0.86    1.36
  13   5   0    0.29    1.11
  13   5   0   -1.28    1.42
  13   5   0   -0.35    0.83
  13   5   0    0.69    1.31
  13   5   0    0.68    0.75
 -13   5   0    0.51    0.71
  13   5   0   -0.58    1.22
  13   5   0   -1.50    1.66
  13   5   0    0.06    1.22
 -13   5   0   -0.33    1.69
 -13   5   0    0.84    1.20
  13   5   0    0.17    1.19
 -13   5   0   -0.28    1.00
 -13   5   0   -0.33    1.04
 -13   5   0   -0.63    1.01
 -13   5   0    1.18    1.40
  13   5   0    0.41    0.80
 -15  -5   0   -0.44    2.07
  15  -5   0    0.04    1.70
  15  -5   0   -2.15    1.97
 -15  -5   0    0.72    2.72
 -15  -5   0    1.35    1.64
 -15  -5   0    0.67    2.53
 -15  -5   0    0.32    1.50
 -15  -5   0    0.27    1.16
 -15  -5   0    0.58    1.08
  15  -5   0    0.48    1.24
  15  -5   0    0.98    1.04
  15  -5   0    0.93    2.23
  15  -5   0   -0.57    1.86
  15  -5   0   -0.11    1.53
 -15  -5   0    0.60    1.65
 -15  -5   0    1.01    1.92
  15   5   0   -0.60    1.10
 -15   5   0    1.01    2.40
  15   5   0    0.60    1.49
  15   5   0   -1.96    1.52
  15   5   0   -0.70    1.36
 -15   5   0    1.40    1.36
  15   5   0    0.93    2.50
  15   5   0    0.48    1.62
 -15   5   0   -1.36    1.43
 -15   5   0    0.47    2.33
 -15   5   0    0.35    1.38
 -15   5   0    0.22    1.38
  15   5   0   -0.45    1.81
 -15   5   0    1.58    2.45
 -15   5   0    0.24    0.80
  15   5   0    0.32    2.13
 -15   5   0   -0.33    1.44
  15   5   0   -0.73    0.90
 -15   5   0    0.69    1.56
   0  -6   0  123.88   10.22
   0  -6   0  119.82   10.22
   0  -6   0  119.04   10.23
   0  -6   0  118.58   10.22
   0  -6   0  124.44   10.23
   0  -6   0  121.81   10.23
   0  -6   0  118.25   10.22
   0  -6   0  121.95   10.23
   0  -6   0  122.89   10.21
   0   6   0  122.29   10.23
   0   6   0  124.80   10.24
   0   6   0  122.22   10.22
   0   6   0  127.66   10.22
   0   6   0  121.74   10.23
   0   6   0  118.08   10.22
   0   6   0  123.21   10.21
   0   6   0  123.81   10.22
   0   6   0  129.27   10.23
   0   6   0  123.18   10.21
   0   6   0  126.01   10.22
  -2  -6   0   23.96    2.33
   2  -6   0   25.18    2.33
  -2  -6   0   27.93    2.34
  -2  -6   0   30.15    2.33
  -2  -6   0   27.12    2.32
   2  -6   0   25.56    2.31
   2  -6   0   25.57    2.32
   2  -6   0   27.30    2.32
  -2  -6   0   27.89    2.37
  -2  -6   0   25.06    2.31
   2  -6   0   27.31    2.31
   2  -6   0   26.25    2.35
  -2  -6   0   25.39    2.31
  -2  -6   0   25.50    2.31
  -2  -6   0   26.57    2.31
  -2  -6   0   28.20    2.32
   2  -6   0   26.96    2.33
   2  -6   0   28.33    2.33
   2  -6   0   24.39    2.30
   2  -6   0   29.87    2.34
  -2   6   0   26.71    2.35
  -2   6   0   26.69    2.31
  -2   6   0   25.85    2.30
   2   6   0   26.51    2.33
  -2   6   0   26.88    2.33
  -2   6   0   26.22    2.30
  -2   6   0   28.91    2.31
  -2   6   0   28.21    2.33
   2   6   0   27.69    2.31
  -2   6   0   28.12    2.29
   2   6   0   27.04    2.33
  -2   6   0   27.17    2.33
  -2   6   0   26.93    2.34
   2   6   0   25.79    2.34
   2   6   0   27.85    2.35
   2   6   0   28.05    2.30
   2   6   0   26.49    2.30
   2   6   0   27.02    2.33
   2   6   0   29.15    2.32
   4  -6   0  125.93   10.29
  -4  -6   0  126.58   10.28
  -4  -6   0  119.38   10.28
  -4  -6   0  133.63   10.30
   4  -6   0  126.46   10.29
   4  -6   0  127.31   10.29
  -4  -6   0  130.89   10.29
  -4  -6   0  120.90   10.30
  -4  -6   0  117.15   10.27
   4  -6   0  126.71   10.27
  -4  -6   0  125.37   10.29
   4  -6   0  112.08   10.27
  -4  -6   0  125.99   10.27
  -4  -6   0  126.75   10.28
  -4  -6   0  117.31   10.27
   4  -6   0  120.61   10.26
   4  -6   0  123.62   10.27
   4  -6   0  125.08   10.29
   4  -6   0  128.15   10.28
  -4  -6   0  122.68   10.28
   4  -6   0  130.81   10.28
   4  -6   0  126.98   10.30
  -4   6   0  118.33   10.28
   4   6   0  118.86   10.30
   4   6   0  121.98   10.27
  -4   6   0  130.08   10.28
  -4   6   0  118.83   10.29
   4   6   0  130.59   10.28
  -4   6   0  123.05   10.28
   4   6   0  116.22   10.28
   4   6   0  120.06   10.28
   4   6   0  122.51   10.26
   4   6   0  128.55   10.30
  -4   6   0  123.24   10.29
  -4   6   0  118.07   10.30
  -4   6   0  118.20   10.26
  -4   6   0  119.96   10.26
  -4   6   0  126.86   10.29
   4   6   0  117.25   10.26
   4   6   0  115.33   10.28
   6  -6   0  261.89   22.92
   6  -6   0  262.56   22.96
  -6  -6   0  281.59   22.97
  -6  -6   0  276.13   22.94
  -6  -6   0  291.34   22.95
   6  -6   0  269.04   22.94
  -6  -6   0  276.79   22.94
   6  -6   0  268.69   22.96
   6  -6   0  271.35   22.95
   6  -6   0  283.69   22.96
  -6  -6   0  267.42   22.95
   6  -6   0  268.21   22.94
   6  -6   0  276.97   22.93
  -6  -6   0  280.86   22.96
   6  -6   0  270.63   22.94
   6  -6   0  280.41   22.95
  -6  -6   0  275.62   22.94
  -6  -6   0  273.87   22.95
  -6  -6   0  271.33   22.95
  -6  -6   0  290.90   22.94
  -6   6   0  277.97   22.93
  -6   6   0  270.46   22.97
   6   6   0  283.99   22.95
  -6   6   0  277.30   22.94
   6   6   0  268.41   22.92
   6   6   0  295.21   22.95
  -6   6   0  273.42   22.96
   6   6   0  271.91   22.94
   6   6   0  278.53   22.94
   6   6   0  272.53   22.96
  -6   6   0  261.55   22.93
  -6   6   0  273.72   22.95
  -6   6   0  288.69   22.95
   6   6   0  278.46   22.95
  -6   6   0  277.24   22.94
   6   6   0  275.93   22.93
   6   6   0  279.87   22.96
  -6   6   0  273.45   22.94
  -8  -6   0   25.29    2.20
  -8  -6   0   26.34    2.22
   8  -6   0   23.58    2.27
  -8  -6   0   24.80    2.14
  -8  -6   0   20.43    2.20
   8  -6   0   25.45    2.22
  -8  -6   0   24.24    2.27
   8  -6   0   26.67    2.18
   8  -6   0   24.27    2.10
   8  -6   0   23.89    2.22
   8  -6   0   23.52    2.19
  -8  -6   0   24.60    2.27
  -8  -6   0   24.94    2.21
  -8  -6   0   22.52    2.21
   8  -6   0   23.39    2.18
   8  -6   0   25.04    2.13
  -8   6   0   27.15    2.25
   8   6   0   21.86    2.24
  -8   6   0   23.89    2.18
   8   6   0   22.48    2.20
   8   6   0   24.77    2.18
  -8   6   0   20.90    2.24
   8   6   0   23.35    2.12
   8   6   0   23.67    2.28
  -8   6   0   21.86    2.14
   8   6   0   23.88    2.22
   8   6   0   22.45    2.23
  -8   6   0   24.27    2.12
   8   6   0   24.02    2.09
  -8   6   0   21.97    2.28
  -8   6   0   26.30    2.31
  -8   6   0   22.20    2.18
  -8   6   0   21.87    2.10
   8   6   0   21.50    2.13
 -10  -6   0   46.67    4.16
  10  -6   0   50.17    4.16
 -10  -6   0   48.16    4.18
 -10  -6   0   48.98    4.38
 -10  -6   0   47.05    4.27
 -10  -6   0   43.81    4.26
 -10  -6   0   54.32    4.34
  10  -6   0   50.64    4.33
 -10  -6   0   46.81    4.32
  10  -6   0   48.40    4.15
 -10  -6   0   48.28    4.24
  10  -6   0   50.22    4.23
  10  -6   0   49.74    4.25
 -10  -6   0   54.40    4.26
  10  -6   0   46.05    4.36
  10  -6   0   50.10    4.26
  10  -6   0   44.35    4.24
  10  -6   0   44.03    4.22
  10   6   0   50.91    4.25
  10   6   0   46.33    4.29
  10   6   0   50.66    4.25
  10   6   0   44.96    4.12
 -10   6   0   50.44    4.32
  10   6   0   48.90    4.23
  10   6   0   49.68    4.34
 -10   6   0   51.10    4.28
  10   6   0   44.48    4.19
 -10   6   0   46.89    4.20
 -10   6   0   51.10    4.36
  10   6   0   57.51    4.32
 -10   6   0   49.23    4.26
 -10   6   0   48.46    4.30
 -10   6   0   47.93    4.17
  10   6   0   46.55    4.16
 -10   6   0   45.77    4.17
  12  -6   0    0.99    1.00
 -12  -6   0    1.16    1.54
 -12  -6   0    1.24    1.19
  12  -6   0    3.39    1.18
  12  -6   0    0.76    1.19
  12  -6   0    2.40    1.09
  12  -6   0    2.61    0.72
  12  -6   0    1.74    0.88
  12  -6   0    2.33    1.23
  12  -6   0    1.83    1.32
 -12  -6   0    0.47    1.73
 -12  -6   0   -0.15    1.06
 -12  -6   0    1.56    1.37
 -12  -6   0    1.63    0.78
  12  -6   0    2.01    1.44
 -12  -6   0    1.04    0.86
 -12  -6   0    1.60    1.10
 -12   6   0    1.60    1.10
  12   6   0    2.32    1.26
 -12   6   0    3.46    1.53
 -12   6   0    0.90    0.67
 -12   6   0    0.96    0.91
  12   6   0    0.75    0.82
  12   6   0    2.15    0.89
 -12   6   0    1.13    1.28
  12   6   0    2.62    1.48
  12   6   0    1.94    0.87
 -12   6   0    2.17    1.03
 -12   6   0   -0.10    1.50
  12   6   0    2.30    1.31
 -12   6   0    2.50    1.29
 -12   6   0    1.44    1.33
 -12   6   0    1.54    0.92
 -12   6   0    3.58    0.93
  12   6   0    3.78    1.34
  12   6   0    1.72    1.03
  12   6   0    1.21    1.01
  14  -6   0    9.19    1.93
  14  -6   0   10.12    1.72
  14  -6   0    8.25    1.40
 -14  -6   0    5.58    2.33
 -14  -6   0    6.83    2.03
 -14  -6   0    5.18    1.36
 -14  -6   0    3.94    2.48
 -14  -6   0    7.62    1.78
  14  -6   0    5.11    1.60
  14  -6   0    7.93    1.21
 -14  -6   0    9.67    1.71
  14  -6   0    9.39    1.99
  14  -6   0    7.76    1.60
 -14  -6   0    6.52    1.26
 -14  -6   0   11.58    1.67
  14  -6   0    9.10    1.74
 -14  -6   0    8.16    1.74
  14   6   0   11.18    1.66
 -14   6   0    6.77    2.32
 -14   6   0   11.88    1.52
 -14   6   0    7.30    1.18
  14   6   0    8.56    2.02
 -14   6   0    6.71    1.39
 -14   6   0    8.23    1.52
 -14   6   0   10.53    2.37
  14   6   0    6.40    1.74
  14   6   0    7.16    1.66
 -14   6   0    7.11    1.94
 -14   6   0    8.92    1.98
 -14   6   0   10.32    1.58
  14   6   0    9.25    2.29
 -14   6   0    8.37    1.69
  14   6   0    8.74    1.30
  14   6   0    8.92    1.28
 -14   6   0    7.32    2.15
  14   6   0    8.71    1.11
  14   6   0    7.57    1.92
  14   6   0    7.97    2.05
  16  -6   0    4.10    1.58
 -16  -6   0    3.19    1.33
  16  -6   0    5.51    2.15
 -16  -6   0    1.74    2.24
 -16  -6   0    5.74    2.13
  16  -6   0    5.86    2.44
  16  -6   0    4.23    2.65
  16  -6   0    5.13    1.98
 -16  -6   0    7.36    2.55
 -16  -6   0    2.02    2.02
 -16  -6   0    3.19    2.42
  16  -6   0    3.22    1.29
 -16  -6   0    9.15    3.69
  16  -6   0    4.48    2.94
  16   6   0    2.42    1.38
  16   6   0    5.20    2.37
 -16   6   0    2.78    0.98
 -16   6   0    5.46    1.68
  16   6   0    8.79    2.77
 -16   6   0    4.80    2.35
  16   6   0    6.34    2.59
 -16   6   0    4.74    3.19
 -16   6   0    4.34    1.98
 -16   6   0    7.33    2.72
 -16   6   0    3.50    1.86
 -16   6   0    5.52    3.25
  16   6   0    2.78    1.07
  16   6   0    2.89    1.81
  16   6   0    2.82    2.39
  16   6   0    3.61    1.37
 -16   6   0    4.44    1.83
  16   6   0    1.92    2.03
 -16   6   0    4.99    2.36
  -1  -7   0   54.81    4.68
   1  -7   0   55.49    4.69
  -1  -7   0   59.64    4.70
   1  -7   0   52.82    4.68
  -1  -7   0   51.38    4.68
   1  -7   0   55.32    4.65
  -1  -7   0   52.19    4.67
  -1  -7   0   50.75    4.66
  -1  -7   0   57.61    4.68
   1  -7   0   52.84    4.70
  -1  -7   0   56.73    4.68
   1  -7   0   55.74    4.68
   1  -7   0   56.14    4.67
   1  -7   0   58.56    4.67
  -1  -7   0   60.24    4.67
   1  -7   0   56.47    4.69
  -1  -7   0   53.34    4.70
   1  -7   0   53.72    4.67
  -1   7   0   53.58    4.70
   1   7   0   54.64    4.66
   1   7   0   53.71    4.67
   1   7   0   53.77    4.70
   1   7   0   59.73    4.68
   1   7   0   57.60    4.67
   1   7   0   55.17    4.69
  -1   7   0   51.58    4.66
  -1   7   0   56.04    4.68
   1   7   0   55.29    4.65
  -1   7   0   57.91    4.69
  -1   7   0   55.09    4.68
   1   7   0   55.12    4.66
  -1   7   0   52.88    4.68
   1   7   0   58.89    4.68
  -1   7   0   53.76    4.66
  -1   7   0   56.36    4.67
  -1   7   0   57.18    4.64
  -1   7   0   57.93    4.66
   1   7   0   57.28    4.67
  -3  -7   0   63.70    5.25
  -3  -7   0   61.79    5.27
   3  -7   0   61.96    5.26
   3  -7   0   59.18    5.26
  -3  -7   0   61.03    5.24
  -3  -7   0   68.26    5.25
   3  -7   0   60.02    5.26
   3  -7   0   59.51    5.24
   3  -7   0   56.45    5.27
  -3  -7   0   65.06    5.26
   3  -7   0   61.82    5.25
  -3  -7   0   58.69    5.25
  -3  -7   0   60.19    5.28
  -3  -7   0   61.59    5.24
   3  -7   0   65.63    5.24
   3  -7   0   61.76    5.27
   3  -7   0   62.81    5.26
  -3  -7   0   60.99    5.25
   3  -7   0   64.68    5.24
  -3  -7   0   63.65    5.29
   3   7   0   61.02    5.25
  -3   7   0   60.77    5.26
  -3   7   0   61.51    5.25
  -3   7   0   63.22    5.24
   3   7   0   68.79    5.24
  -3   7   0   59.83    5.22
  -3   7   0   59.28    5.25
   3   7   0   64.67    5.23
   3   7   0   61.71    5.26
  -3   7   0   65.93    5.27
   3   7   0   63.03    5.23
  -3   7   0   64.32    5.26
   3   7   0   66.14    5.25
   3   7   0   63.08    5.26
  -3   7   0   59.57    5.26
  -3   7   0   60.42    5.28
   3   7   0   62.42    5.26
   3   7   0   65.12    5.28
   5  -7   0   15.61    1.31
   5  -7   0   10.87    1.22
   5  -7   0   11.61    1.30
  -5  -7   0   10.60    1.29
  -5  -7   0   13.92    1.25
   5  -7   0   10.45    1.20
   5  -7   0   14.01    1.23
  -5  -7   0   11.99    1.28
  -5  -7   0   13.81    1.27
  -5  -7   0   13.17    1.31
   5  -7   0   13.91    1.26
  -5  -7   0   11.61    1.24
  -5  -7   0   10.35    1.21
  -5  -7   0   15.27    1.26
  -5  -7   0   12.08    1.26
   5  -7   0   13.93    1.33
  -5  -7   0   11.82    1.37
   5  -7   0   13.71    1.22
   5  -7   0   11.71    1.25
   5  -7   0   11.30    1.24
  -5  -7   0   13.47    1.33
  -5   7   0   13.57    1.25
   5   7   0   12.62    1.25
   5   7   0   11.72    1.30
  -5   7   0   10.95    1.20
   5   7   0   13.85    1.31
  -5   7   0   11.35    1.20
  -5   7   0   14.35    1.35
  -5   7   0   13.38    1.34
   5   7   0   13.98    1.27
   5   7   0   14.71    1.18
   5   7   0   12.89    1.22
   5   7   0   11.71    1.32
   5   7   0   11.98    1.28
  -5   7   0   13.22    1.17
  -5   7   0   15.35    1.27
  -5   7   0   11.19    1.22
  -5   7   0   14.21    1.32
   5   7   0   12.33    1.18
  -7  -7   0   15.51    1.52
   7  -7   0   12.06    1.44
  -7  -7   0   10.82    1.47
   7  -7   0   14.31    1.29
   7  -7   0   12.62    1.34
   7  -7   0   11.95    1.29
   7  -7   0   14.16    1.38
  -7  -7   0   14.54    1.30
   7  -7   0   11.94    1.35
  -7  -7   0   13.22    1.45
   7  -7   0   14.10    1.38
   7  -7   0   13.18    1.46
  -7  -7   0   13.83    1.51
  -7  -7   0   10.74    1.41
  -7  -7   0   14.26    1.44
  -7  -7   0   11.20    1.34
   7  -7   0   14.24    1.37
  -7  -7   0   13.26    1.41
   7  -7   0   14.61    1.52
  -7  -7   0   13.45    1.43
   7   7   0   11.72    1.45
   7   7   0   13.29    1.30
  -7   7   0   14.19    1.27
   7   7   0   14.54    1.41
   7   7   0   13.56    1.52
  -7   7   0   12.00    1.40
   7   7   0   13.90    1.43
  -7   7   0   13.47    1.50
   7   7   0   13.64    1.27
  -7   7   0   12.41    1.36
  -7   7   0   13.02    1.30
   7   7   0   15.10    1.38
  -7   7   0   12.02    1.30
  -7   7   0   12.33    1.27
  -7   7   0   11.89    1.33
   7   7   0   12.64    1.24
   7   7   0   12.52    1.41
  -7   7   0   12.69    1.41
  -9  -7   0    1.65    0.66
   9  -7   0    2.36    0.59
  -9  -7   0    2.56    1.04
  -9  -7   0    1.17    0.81
   9  -7   0    1.99    0.86
   9  -7   0    1.55    0.93
  -9  -7   0    0.77    0.84
   9  -7   0    2.19    0.67
   9  -7   0    1.22    0.79
  -9  -7   0    1.93    0.89
   9  -7   0    1.19    0.78
  -9  -7   0    1.72    0.85
  -9  -7   0    1.66    0.72
  -9  -7   0    1.95    1.02
   9  -7   0    0.73    1.03
  -9  -7   0    1.63    1.10
  -9   7   0    1.86    0.62
   9   7   0    1.69    0.93
   9   7   0    2.22    0.62
   9   7   0    2.07    0.87
   9   7   0    2.30    0.94
  -9   7   0    2.66    0.87
   9   7   0    2.25    0.68
   9   7   0    1.81    0.84
  -9   7   0    1.23    0.68
  -9   7   0    1.68    0.73
   9   7   0    3.29    0.85
  -9   7   0    1.24    0.60
   9   7   0    2.30    0.54
  -9   7   0    0.98    1.10
  -9   7   0    1.38    0.62
   9   7   0    2.30    1.07
  -9   7   0    0.84    0.76
  11  -7   0    3.19    1.22
 -11  -7   0    1.32    1.07
  11  -7   0    3.02    0.75
  11  -7   0    6.59    1.00
 -11  -7   0    2.71    0.84
  11  -7   0    4.06    0.90
  11  -7   0    4.76    1.07
 -11  -7   0    1.77    1.50
 -11  -7   0    3.51    1.39
  11  -7   0    2.55    1.05
 -11  -7   0    0.83    1.13
  11  -7   0    4.60    1.25
 -11  -7   0    2.66    0.90
 -11  -7   0    4.25    1.14
 -11  -7   0    2.65    1.23
  11  -7   0    2.45    1.36
 -11  -7   0    5.14    1.59
  11   7   0    3.15    1.21
 -11   7   0    3.47    0.85
  11   7   0    2.68    1.01
  11   7   0    5.19    1.27
 -11   7   0    3.71    0.86
 -11   7   0    3.90    0.73
 -11   7   0    2.86    1.04
  11   7   0    4.03    1.40
  11   7   0    4.40    1.14
 -11   7   0    1.94    1.24
  11   7   0    4.39    0.70
 -11   7   0    4.18    1.48
 -11   7   0    3.17    0.90
  11   7   0    3.63    0.87
  11   7   0    3.59    1.17
 -11   7   0    4.80    1.42
 -11   7   0    3.25    1.25
  13  -7   0   10.71    1.84
  13  -7   0   12.54    2.04
  13  -7   0   14.84    2.21
  13  -7   0   12.97    2.05
 -13  -7   0    9.42    2.71
 -13  -7   0   11.65    2.35
 -13  -7   0   10.45    1.73
  13  -7   0   15.08    2.08
 -13  -7   0   10.11    1.52
  13  -7   0   13.76    1.89
  13  -7   0   13.27    1.77
 -13  -7   0   10.36    2.12
 -13  -7   0   10.63    1.60
 -13  -7   0   12.83    1.91
  13  -7   0   11.92    1.58
  13  -7   0   12.39    1.38
 -13  -7   0   10.40    2.08
 -13  -7   0   12.51    1.90
 -13   7   0   11.54    1.52
 -13   7   0   14.74    1.75
  13   7   0   12.05    1.92
  13   7   0   10.97    2.55
 -13   7   0   18.36    2.08
  13   7   0   10.22    1.89
  13   7   0   16.12    2.07
  13   7   0   14.34    1.72
 -13   7   0   14.83    2.10
  13   7   0   11.86    1.79
  13   7   0   14.80    2.03
  13   7   0   12.59    1.58
 -13   7   0   13.91    1.65
 -13   7   0   10.72    1.73
  13   7   0   16.94    1.87
 -13   7   0   10.35    1.65
  13   7   0   13.18    1.46
 -13   7   0   11.21    1.77
 -13   7   0   14.68    2.27
  15  -7   0    1.86    2.12
  15  -7   0   -0.21    1.40
 -15  -7   0   -0.96    1.79
 -15  -7   0    0.91    2.25
  15  -7   0   -0.39    1.82
 -15  -7   0   -1.11    1.84
 -15  -7   0   -1.21    3.10
 -15  -7   0    0.92    2.43
  15  -7   0    0.21    2.27
 -15  -7   0   -0.76    2.89
  15  -7   0    1.61    1.64
  15  -7   0   -0.41    1.06
 -15  -7   0   -0.87    1.18
  15  -7   0   -1.37    1.68
  15  -7   0    2.86    2.61
 -15  -7   0   -0.22    2.24
 -15  -7   0   -0.41    1.97
  15   7   0   -1.13    1.21
  15   7   0   -0.42    2.05
 -15   7   0   -0.30    1.33
  15   7   0    1.41    2.64
 -15   7   0    1.62    1.66
 -15   7   0   -0.12    0.93
  15   7   0    0.39    2.30
  15   7   0    0.39    0.91
 -15   7   0    0.57    2.85
  15   7   0    1.14    1.85
 -15   7   0    0.21    1.52
 -15   7   0   -1.04    2.83
 -15   7   0   -0.95    1.77
  15   7   0    0.44    1.24
 -15   7   0    1.83    2.11
  15   7   0   -0.42    1.52
 -15   7   0    0.73    1.27
   0  -8   0   16.32    1.55
   0  -8   0   16.38    1.50
   0  -8   0   16.11    1.47
   0  -8   0   15.58    1.44
   0  -8   0   14.17    1.52
   0  -8   0   16.28    1.48
   0  -8   0   13.83    1.43
   0  -8   0   17.09    1.50
   0  -8   0   16.27    1.47
   0   8   0   19.28    1.50
   0   8   0   15.12    1.45
   0   8   0   16.92    1.51
   0   8   0   16.38    1.47
   0   8   0   12.74    1.46
   0   8   0   15.62    1.49
   0   8   0   17.03    1.45
   0   8   0   16.05    1.40
   0   8   0   15.61    1.44
   0   8   0   15.23    1.49
   2  -8   0  120.35   10.34
   2  -8   0  130.01   10.35
   2  -8   0  126.75   10.35
   2  -8   0  126.16   10.36
  -2  -8   0  123.90   10.35
   2  -8   0  124.26   10.35
  -2  -8   0  122.47   10.32
  -2  -8   0  120.59   10.37
  -2  -8   0  124.19   10.35
   2  -8   0  126.71   10.36
  -2  -8   0  127.30   10.34
   2  -8   0  121.02   10.36
  -2  -8   0  119.94   10.34
  -2  -8   0  119.78   10.37
  -2  -8   0  125.82   10.35
   2  -8   0  134.16   10.34
   2  -8   0  128.79   10.32
  -2  -8   0  123.08   10.33
  -2   8   0  132.50   10.35
  -2   8   0  124.82   10.34
   2   8   0  126.29   10.32
  -2   8   0  123.13   10.36
   2   8   0  123.00   10.35
  -2   8   0  119.77   10.31
  -2   8   0  122.05   10.32
   2   8   0  119.29   10.34
   2   8   0  121.27   10.35
   2   8   0  120.45   10.34
  -2   8   0  123.92   10.33
  -2   8   0  124.91   10.33
   2   8   0  121.41   10.32
  -2   8   0  121.83   10.36
   2   8   0  119.96   10.33
   2   8   0  120.44   10.36
  -2   8   0  125.87   10.35
  -2   8   0  120.65   10.35
   2   8   0  122.18   10.34
  -4  -8   0   68.75    5.30
  -4  -8   0   65.35    5.29
   4  -8   0   62.32    5.29
  -4  -8   0   62.65    5.26
   4  -8   0   63.47    5.26
  -4  -8   0   64.77    5.31
  -4  -8   0   57.37    5.27
   4  -8   0   65.71    5.28
   4  -8   0   59.20    5.29
   4  -8   0   67.57    5.30
  -4  -8   0   63.10    5.27
  -4  -8   0   61.55    5.33
   4  -8   0   58.38    5.28
  -4  -8   0   59.49    5.29
  -4  -8   0   53.96    5.27
   4  -8   0   64.58    5.27
   4  -8   0   60.11    5.29
   4  -8   0   58.83    5.29
  -4  -8   0   63.54    5.28
  -4   8   0   60.20    5.30
  -4   8   0   64.16    5.24
   4   8   0   62.80    5.29
   4   8   0   64.28    5.30
   4   8   0   60.89    5.28
   4   8   0   65.10    5.26
  -4   8   0   63.56    5.27
  -4   8   0   66.18    5.40
   4   8   0   60.72    5.24
  -4   8   0   62.04    5.32
   4   8   0   64.10    5.32
  -4   8   0   66.91    5.29
  -4   8   0   58.92    5.26
   4   8   0   60.77    5.30
  -4   8   0   62.88    5.30
  -4   8   0   65.98    5.28
   4   8   0   61.97    5.24
   4   8   0   60.36    5.28
  -6  -8   0   48.92    4.26
  -6  -8   0   48.65    4.25
  -6  -8   0   49.26    4.28
  -6  -8   0   51.80    4.25
  -6  -8   0   48.76    4.20
  -6  -8   0   48.10    4.30
  -6  -8   0   50.07    4.23
   6  -8   0   47.67    4.28
   6  -8   0   47.96    4.28
  -6  -8   0   50.14    4.24
   6  -8   0   50.01    4.18
   6  -8   0   50.02    4.25
   6  -8   0   49.94    4.20
  -6  -8   0   50.06    4.21
   6  -8   0   52.87    4.20
  -6  -8   0   46.95    4.21
  -6  -8   0   54.91    4.28
   6  -8   0   52.97    4.23
   6  -8   0   48.91    4.23
   6  -8   0   50.46    4.25
   6  -8   0   48.91    4.22
   6  -8   0   47.60    4.24
   6   8   0   55.11    4.28
   6   8   0   46.08    4.20
   6   8   0   46.02    4.23
   6   8   0   51.72    4.24
   6   8   0   47.63    4.17
  -6   8   0   48.40    4.17
  -6   8   0   46.22    4.21
  -6   8   0   49.43    4.22
   6   8   0   50.67    4.18
  -6   8   0   46.14    4.22
  -6   8   0   48.79    4.28
  -6   8   0   48.51    4.20
   6   8   0   49.57    4.23
  -6   8   0   48.84    4.26
  -6   8   0   48.78    4.18
   6   8   0   46.36    4.23
   8  -8   0   34.48    3.20
   8  -8   0   35.70    3.20
   8  -8   0   35.89    3.13
   8  -8   0   42.10    3.33
  -8  -8   0   36.82    3.25
  -8  -8   0   31.86    3.37
  -8  -8   0   32.12    3.17
  -8  -8   0   42.39    3.28
   8  -8   0   36.72    3.24
   8  -8   0   32.06    3.36
   8  -8   0   31.76    3.19
  -8  -8   0   40.09    3.26
   8  -8   0   37.11    3.19
   8  -8   0   37.59    3.25
  -8  -8   0   35.23    3.32
  -8  -8   0   34.41    3.17
  -8  -8   0   38.54    3.33
  -8  -8   0   35.60    3.24
   8  -8   0   37.36    3.18
  -8  -8   0   36.67    3.23
  -8   8   0   38.10    3.33
   8   8   0   39.16    3.33
  -8   8   0   39.31    3.13
   8   8   0   36.63    3.27
  -8   8   0   39.97    3.25
   8   8   0   34.88    3.27
  -8   8   0   33.26    3.16
   8   8   0   36.27    3.15
  -8   8   0   33.96    3.23
   8   8   0   29.64    3.18
   8   8   0   36.47    3.23
  -8   8   0   35.61    3.19
  -8   8   0   36.13    3.13
  -8   8   0   33.28    3.19
   8   8   0   36.93    3.15
   8   8   0   38.87    3.35
   8   8   0   35.63    3.22
  10  -8   0  136.28   10.94
 -10  -8   0  132.26   11.11
 -10  -8   0  125.55   10.96
  10  -8   0  133.92   11.03
  10  -8   0  127.43   11.03
  10  -8   0  146.18   11.05
  10  -8   0  131.29   11.05
  10  -8   0  135.53   11.03
  10  -8   0  129.56   11.02
 -10  -8   0  123.36   11.02
 -10  -8   0  134.69   11.03
 -10  -8   0  119.79   11.01
 -10  -8   0  139.26   11.05
 -10  -8   0  133.74   10.99
 -10  -8   0  134.75   11.03
  10  -8   0  138.50   11.02
 -10   8   0  136.49   11.05
  10   8   0  128.13   11.03
 -10   8   0  131.38   10.94
  10   8   0  112.58   10.95
  10   8   0  124.88   10.96
  10   8   0  122.78   11.06
  10   8   0  132.36   11.03
  10   8   0  124.36   10.92
 -10   8   0  128.98   11.00
 -10   8   0  126.39   11.09
  10   8   0  134.33   11.05
 -10   8   0  123.13   10.98
  10   8   0  129.40   11.00
 -10   8   0  129.12   11.03
 -10   8   0  140.21   10.97
 -10   8   0  134.25   11.06
 -10   8   0  134.64   11.00
 -12  -8   0    9.78    1.65
 -12  -8   0    9.63    1.38
 -12  -8   0   10.13    1.57
 -12  -8   0    8.01    1.71
  12  -8   0    9.98    1.98
  12  -8   0    7.92    1.14
  12  -8   0   10.77    1.50
  12  -8   0    6.43    1.53
 -12  -8   0   10.25    1.88
 -12  -8   0    5.84    1.57
  12  -8   0    9.93    1.59
 -12  -8   0   10.39    1.98
 -12  -8   0    7.37    1.28
  12  -8   0    6.03    1.42
  12  -8   0   10.42    1.78
  12  -8   0    6.53    1.32
 -12  -8   0   12.14    1.85
  12   8   0    9.91    1.71
 -12   8   0    8.79    1.20
  12   8   0    9.81    1.96
  12   8   0    9.06    1.74
  12   8   0   10.28    1.10
  12   8   0    7.07    1.22
  12   8   0    8.68    1.44
 -12   8   0    7.74    1.37
  12   8   0    9.09    1.54
 -12   8   0   11.71    1.53
 -12   8   0   12.00    1.58
  12   8   0    8.06    1.67
 -12   8   0   11.54    1.93
 -12   8   0    8.52    1.30
 -12   8   0    8.56    1.75
  12   8   0   11.73    1.76
 -12   8   0   10.23    1.77
 -14  -8   0   -0.69    1.59
 -14  -8   0   -1.00    1.73
  14  -8   0   -0.45    1.45
  14  -8   0    1.17    2.38
 -14  -8   0    0.71    1.16
 -14  -8   0   -0.32    2.20
  14  -8   0    0.18    2.21
 -14  -8   0   -1.97    1.78
  14  -8   0   -0.69    0.95
  14  -8   0    0.64    1.62
 -14  -8   0    0.65    2.13
  14  -8   0   -0.99    1.44
  14  -8   0   -0.11    1.47
 -14  -8   0   -0.62    2.51
 -14  -8   0    0.36    3.20
  14  -8   0    0.15    1.73
 -14   8   0    0.24    0.89
  14   8   0   -0.45    0.83
 -14   8   0    0.42    1.67
  14   8   0    0.99    1.32
  14   8   0    1.92    2.15
  14   8   0   -2.34    2.40
  14   8   0   -0.25    1.12
  14   8   0   -1.72    1.59
 -14   8   0    1.09    1.41
 -14   8   0   -0.16    2.58
  14   8   0    0.34    2.10
 -14   8   0    1.75    1.74
 -14   8   0    0.28    1.95
 -14   8   0    0.21    1.34
 -14   8   0    2.20    2.79
  14   8   0   -0.74    1.57
  14   8   0   -0.22    1.43
 -14   8   0   -0.55    1.07
   1  -9   0   82.61    7.11
  -1  -9   0   90.71    7.08
  -1  -9   0   84.52    7.11
  -1  -9   0   80.75    7.08
   1  -9   0   85.98    7.09
   1  -9   0   85.46    7.07
   1  -9   0   91.11    7.09
  -1  -9   0   82.43    7.06
  -1  -9   0   85.00    7.05
  -1  -9   0   82.73    7.11
   1  -9   0   82.50    7.09
  -1  -9   0   76.12    7.07
  -1  -9   0   78.87    7.08
   1  -9   0   82.35    7.10
   1  -9   0   81.95    7.08
   1  -9   0   83.73    7.05
  -1  -9   0   84.62    7.09
  -1   9   0   78.23    7.05
   1   9   0   89.13    7.10
  -1   9   0   90.90    7.12
  -1   9   0   83.13    7.09
   1   9   0   81.58    7.05
  -1   9   0   86.42    7.06
   1   9   0   81.24    7.05
   1   9   0   79.69    7.08
  -1   9   0   81.46    7.03
   1   9   0   86.26    7.12
  -1   9   0   86.34    7.07
  -1   9   0   84.95    7.06
  -1   9   0   82.96    7.08
  -1   9   0   87.11    7.12
   1   9   0   81.77    7.04
   1   9   0   89.60    7.07
   1   9   0   85.95    7.10
   1   9   0   86.78    7.05
   1   9   0   85.44    7.09
   1   9   0   85.02    7.07
  -1   9   0   85.34    7.08
  -3  -9   0    6.85    1.09
   3  -9   0    8.49    0.97
   3  -9   0   10.72    1.06
  -3  -9   0    7.06    0.98
  -3  -9   0    8.65    1.04
   3  -9   0    7.61    0.99
  -3  -9   0    8.91    1.04
   3  -9   0    9.16    1.10
   3  -9   0    9.13    1.03
  -3  -9   0    8.28    1.02
  -3  -9   0   10.84    1.17
   3  -9   0    9.09    0.99
   3  -9   0    9.33    0.98
  -3  -9   0    9.33    0.99
  -3  -9   0   10.89    1.00
  -3  -9   0    7.70    1.08
  -3  -9   0    7.79    1.02
   3  -9   0    9.65    1.11
   3  -9   0    9.06    1.06
   3  -9   0    9.36    1.11
   3   9   0    8.75    1.12
  -3   9   0    9.61    0.86
  -3   9   0    8.55    1.08
   3   9   0    8.76    1.00
  -3   9   0    8.49    0.95
   3   9   0    8.41    1.06
  -3   9   0    8.87    0.98
  -3   9   0    9.09    1.09
   3   9   0   11.31    1.07
  -3   9   0    9.02    1.05
  -3   9   0    7.40    0.96
   3   9   0    8.37    0.93
   3   9   0    9.23    0.92
  -3   9   0   11.67    1.10
   3   9   0    8.14    0.91
  -3   9   0    9.32    1.02
   3   9   0    7.82    1.00
   3   9   0   10.05    1.01
  -5  -9   0    3.67    0.74
   5  -9   0    5.16    0.80
  -5  -9   0    5.13    0.88
  -5  -9   0    4.31    0.87
  -5  -9   0    2.50    0.92
  -5  -9   0    6.06    0.85
   5  -9   0    6.23    0.81
   5  -9   0    4.90    0.86
  -5  -9   0    4.76    0.95
  -5  -9   0    5.06    0.76
   5  -9   0    3.44    0.64
   5  -9   0    5.25    0.73
  -5  -9   0    5.69    0.80
   5  -9   0    4.84    0.81
   5  -9   0    3.54    0.77
   5  -9   0    5.37    0.72
  -5  -9   0    5.18    0.79
   5  -9   0    4.05    0.75
  -5  -9   0    5.05    0.86
  -5  -9   0    3.13    0.66
   5  -9   0    5.82    1.01
   5  -9   0    4.58    0.75
  -5   9   0    4.31    0.91
   5   9   0    4.57    0.60
   5   9   0    2.86    0.76
   5   9   0    3.41    0.84
   5   9   0    5.48    0.82
   5   9   0    3.36    0.67
   5   9   0    3.72    0.61
  -5   9   0    5.59    0.97
   5   9   0    5.51    0.98
  -5   9   0    4.16    0.68
   5   9   0    4.41    0.87
  -5   9   0    6.19    0.70
  -5   9   0    5.66    0.89
  -5   9   0    3.52    0.80
  -5   9   0    2.01    0.72
  -5   9   0    4.66    0.60
  -5   9   0    2.88    0.82
   5   9   0    4.26    0.83
  -7  -9   0   17.19    1.90
  -7  -9   0   18.73    2.16
   7  -9   0   17.38    1.99
   7  -9   0   23.43    1.97
  -7  -9   0   22.26    2.22
  -7  -9   0   18.24    2.06
  -7  -9   0   22.85    1.98
   7  -9   0   18.19    1.96
   7  -9   0   21.31    2.10
   7  -9   0   21.81    2.06
   7  -9   0   20.36    1.92
  -7  -9   0   20.64    2.04
  -7  -9   0   17.29    1.92
   7  -9   0   21.13    1.96
  -7  -9   0   16.13    1.98
   7  -9   0   18.29    1.98
  -7  -9   0   20.18    2.02
  -7  -9   0   21.23    2.12
   7  -9   0   19.79    1.92
  -7  -9   0   19.19    1.91
   7  -9   0   18.46    1.94
   7   9   0   19.04    2.01
   7   9   0   19.69    1.84
  -7   9   0   20.02    1.99
  -7   9   0   21.02    1.83
  -7   9   0   20.98    2.04
  -7   9   0   17.51    2.12
   7   9   0   19.19    2.05
   7   9   0   23.65    2.00
   7   9   0   18.16    1.80
  -7   9   0   24.18    1.94
   7   9   0   20.28    1.88
  -7   9   0   22.59    1.85
   7   9   0   19.81    2.10
   7   9   0   20.57    1.96
  -7   9   0   20.46    1.90
  -7   9   0   22.05    2.08
  -9  -9   0   78.38    6.73
   9  -9   0   81.09    6.78
   9  -9   0   80.52    6.63
   9  -9   0   85.26    6.73
  -9  -9   0   74.58    6.79
  -9  -9   0   78.79    6.80
   9  -9   0   82.21    6.74
  -9  -9   0   81.77    6.88
   9  -9   0   72.62    6.71
   9  -9   0   82.23    6.67
  -9  -9   0   79.59    6.68
  -9  -9   0   74.84    6.73
  -9  -9   0   71.48    6.68
   9  -9   0   79.93    6.81
   9  -9   0   76.00    6.74
  -9  -9   0   79.25    6.74
   9  -9   0   75.97    6.71
  -9  -9   0   74.36    6.73
   9  -9   0   83.28    6.73
   9  -9   0   78.95    6.73
   9   9   0   73.98    6.74
  -9   9   0   84.20    6.72
   9   9   0   79.05    6.61
   9   9   0   80.55    6.71
   9   9   0   70.18    6.63
  -9   9   0   78.92    6.79
   9   9   0   82.05    6.67
  -9   9   0   78.80    6.63
  -9   9   0   81.40    6.69
   9   9   0   77.19    6.72
   9   9   0   79.92    6.71
  -9   9   0   80.94    6.81
  -9   9   0   77.55    6.78
  -9   9   0   80.15    6.64
   9   9   0   74.55    6.74
  -9   9   0   76.05    6.69
   9   9   0   78.36    6.80
  11  -9   0   14.32    2.26
 -11  -9   0   15.85    1.91
 -11  -9   0   21.04    2.24
 -11  -9   0   11.45    2.34
  11  -9   0   15.60    1.96
 -11  -9   0   14.31    2.04
  11  -9   0   20.10    2.14
  11  -9   0   13.44    1.95
  11  -9   0   17.63    1.76
 -11  -9   0   14.12    1.83
  11  -9   0   13.01    1.84
  11  -9   0   16.34    1.83
 -11  -9   0   11.71    1.94
 -11  -9   0   17.56    1.91
  11  -9   0   15.33    2.01
 -11  -9   0   11.70    2.15
 -11  -9   0   16.33    2.01
  11  -9   0   17.23    2.01
 -11   9   0   11.56    1.92
  11   9   0   16.01    1.64
 -11   9   0   16.71    2.07
 -11   9   0   19.88    2.24
 -11   9   0   15.69    1.72
 -11   9   0   15.89    2.08
  11   9   0   18.12    2.10
  11   9   0   15.08    1.86
 -11   9   0   18.48    1.95
  11   9   0   15.79    2.25
  11   9   0   19.47    1.98
 -11   9   0   17.73    1.77
  11   9   0   16.64    1.74
 -11   9   0   18.33    2.07
  11   9   0   16.99    1.89
 -11   9   0   19.65    2.11
 -13  -9   0    0.29    1.52
  13  -9   0    3.44    1.01
 -13  -9   0    2.40    1.74
  13  -9   0    1.74    1.49
 -13  -9   0    0.59    1.65
  13  -9   0    0.66    1.63
 -13  -9   0   -1.00    2.38
 -13  -9   0    0.40    1.14
  13  -9   0    1.86    1.86
 -13  -9   0    3.96    2.61
  13  -9   0    1.33    1.40
  13  -9   0    1.91    2.00
  13  -9   0    1.53    2.34
  13  -9   0    0.57    1.88
 -13  -9   0    1.07    2.00
  13  -9   0   -0.43    1.37
 -13   9   0    1.20    1.27
 -13   9   0    2.80    1.06
 -13   9   0   -0.02    2.35
  13   9   0   -0.40    1.38
  13   9   0    2.62    1.92
  13   9   0    2.17    1.41
  13   9   0    2.12    1.11
  13   9   0    2.29    1.58
 -13   9   0   -0.69    1.51
 -13   9   0    1.19    0.92
 -13   9   0    3.09    1.45
 -13   9   0    1.02    1.57
  13   9   0    0.05    1.96
  13   9   0    1.38    0.82
 -13   9   0    0.88    2.18
  13   9   0    1.83    1.80
  13   9   0    1.70    2.07
   0 -10   0    4.47    0.77
   0 -10   0    5.01    0.90
   0 -10   0    4.78    0.86
   0 -10   0    4.47    0.75
   0 -10   0    4.15    0.65
   0 -10   0    4.14    0.93
   0 -10   0    4.45    0.77
   0 -10   0    3.86    0.79
   0 -10   0    3.40    0.63
   0  10   0    5.08    0.68
   0  10   0    3.50    0.62
   0  10   0    6.68    0.71
   0  10   0    6.55    0.88
   0  10   0    5.13    0.62
   0  10   0    7.57    0.86
   0  10   0    6.58    0.95
   0  10   0    5.33    0.85
   0  10   0    3.62    0.66
   0  10   0    6.60    0.83
  -2 -10   0    9.00    1.09
  -2 -10   0    7.38    1.03
  -2 -10   0    7.87    1.00
  -2 -10   0   10.05    1.05
  -2 -10   0    7.68    1.01
  -2 -10   0    8.78    1.22
   2 -10   0   10.06    0.97
   2 -10   0   10.41    1.14
   2 -10   0    9.36    1.14
   2 -10   0    8.67    1.13
   2 -10   0   10.71    1.11
  -2 -10   0    9.57    1.14
  -2 -10   0    7.49    1.06
   2 -10   0    8.31    1.04
   2 -10   0   10.14    1.07
  -2 -10   0    9.92    1.08
   2 -10   0    8.37    1.04
   2 -10   0    7.50    1.17
  -2  10   0    7.36    0.88
   2  10   0    7.53    1.05
   2  10   0    9.58    1.14
  -2  10   0    8.57    0.97
  -2  10   0   10.21    1.07
  -2  10   0   10.51    1.05
   2  10   0    8.10    0.96
   2  10   0   12.32    1.13
  -2  10   0    7.25    1.09
   2  10   0    9.17    1.04
  -2  10   0    9.20    1.15
  -2  10   0   11.75    1.15
   2  10   0   12.13    1.22
  -2  10   0   11.08    1.21
  -2  10   0   10.86    1.13
   2  10   0    9.46    0.98
   2  10   0    7.29    0.93
  -2  10   0    8.74    0.96
   2  10   0   11.90    1.20
  -4 -10   0   10.19    1.28
  -4 -10   0   13.89    1.48
   4 -10   0   12.54    1.47
  -4 -10   0   13.15    1.43
   4 -10   0   13.51    1.41
   4 -10   0   14.81    1.41
  -4 -10   0   10.08    1.54
   4 -10   0   11.09    1.35
   4 -10   0   11.48    1.30
   4 -10   0   10.78    1.34
   4 -10   0    9.39    1.39
   4 -10   0   12.93    1.30
  -4 -10   0   11.72    1.51
   4 -10   0   11.49    1.38
  -4 -10   0   12.15    1.37
  -4 -10   0   13.58    1.35
  -4 -10   0   13.37    1.50
  -4 -10   0   12.66    1.33
  -4 -10   0   11.13    1.33
   4 -10   0   10.66    1.33
   4  10   0   13.13    1.38
   4  10   0   13.78    1.39
  -4  10   0   12.80    1.36
  -4  10   0   13.32    1.36
   4  10   0   13.67    1.38
  -4  10   0   15.68    1.44
  -4  10   0   12.16    1.41
  -4  10   0   12.08    1.42
   4  10   0   14.21    1.41
   4  10   0   11.07    1.21
  -4  10   0   12.08    1.28
   4  10   0   10.46    1.30
  -4  10   0   11.15    1.37
   4  10   0   12.63    1.20
  -4  10   0   12.41    1.17
  -4  10   0   12.75    1.27
   4  10   0   12.39    1.28
   4  10   0   14.43    1.41
   6 -10   0    5.82    0.93
   6 -10   0    2.39    0.66
   6 -10   0    1.53    0.75
   6 -10   0    2.87    0.93
   6 -10   0    2.11    1.10
  -6 -10   0    2.59    1.06
  -6 -10   0    2.11    0.73
   6 -10   0    3.07    0.78
  -6 -10   0    1.29    0.75
  -6 -10   0    3.27    1.06
  -6 -10   0    2.86    0.85
   6 -10   0    3.38    0.77
   6 -10   0    2.79    0.73
  -6 -10   0    4.37    0.95
  -6 -10   0    3.44    0.73
  -6 -10   0    2.51    0.96
  -6 -10   0    2.41    1.21
   6 -10   0    2.97    0.89
  -6 -10   0    3.47    0.96
  -6 -10   0    1.52    0.81
   6 -10   0    3.71    0.99
   6 -10   0    4.12    1.02
  -6  10   0    2.67    1.07
  -6  10   0    2.64    0.92
   6  10   0    2.61    0.77
  -6  10   0    2.73    0.69
  -6  10   0    2.76    0.55
  -6  10   0    2.86    1.03
   6  10   0    1.53    0.66
   6  10   0    4.06    0.90
  -6  10   0    3.44    0.71
  -6  10   0    3.06    0.66
   6  10   0    3.05    0.58
   6  10   0    3.03    0.60
   6  10   0    2.27    1.08
  -6  10   0    3.54    1.00
   6  10   0    2.79    0.84
   6  10   0    3.03    1.00
  -6  10   0    2.74    0.91
   6  10   0    3.73    0.95
  -8 -10   0    1.98    1.20
   8 -10   0    1.83    0.69
   8 -10   0    1.40    1.06
   8 -10   0    2.46    1.12
  -8 -10   0    1.18    1.07
  -8 -10   0    3.13    1.06
   8 -10   0    1.27    0.97
   8 -10   0    1.96    1.01
   8 -10   0    1.87    0.89
  -8 -10   0   -0.05    1.05
   8 -10   0    3.18    1.11
  -8 -10   0    2.21    1.32
   8 -10   0    0.54    0.88
  -8 -10   0    1.24    0.80
   8 -10   0    0.95    1.17
   8 -10   0    3.21    1.30
  -8 -10   0    1.23    1.43
  -8 -10   0    0.55    1.15
  -8 -10   0    1.75    0.89
  -8 -10   0    1.02    0.91
   8 -10   0    2.76    0.95
  -8 -10   0    0.86    0.85
   8  10   0    1.72    1.05
  -8  10   0    0.98    0.98
  -8  10   0    0.86    0.79
  -8  10   0    1.96    1.21
   8  10   0    4.29    1.29
  -8  10   0    1.38    1.04
  -8  10   0    2.41    1.31
  -8  10   0    1.81    0.68
  -8  10   0    0.82    0.68
   8  10   0    0.98    0.68
   8  10   0    3.32    1.22
   8  10   0    1.10    0.60
   8  10   0    3.37    1.00
   8  10   0    2.39    0.91
   8  10   0    1.78    1.04
  -8  10   0    1.84    0.74
   8  10   0    2.51    0.75
  -8  10   0    2.99    1.07
  10 -10   0    7.88    1.77
 -10 -10   0    4.86    1.73
 -10 -10   0    5.98    1.98
  10 -10   0    7.63    1.61
 -10 -10   0    5.83    1.17
  10 -10   0    9.20    1.32
 -10 -10   0    5.15    1.15
  10 -10   0    8.76    1.31
 -10 -10   0    5.47    1.39
  10 -10   0    6.86    1.19
 -10 -10   0    4.39    1.36
  10 -10   0    8.78    1.64
  10 -10   0    6.98    1.01
 -10 -10   0    6.34    1.37
  10 -10   0    6.67    1.26
  10 -10   0    5.81    1.32
 -10 -10   0    6.72    1.16
 -10 -10   0    4.48    1.41
 -10 -10   0    9.61    1.59
 -10  10   0    7.04    1.78
 -10  10   0    5.56    1.28
 -10  10   0    5.19    1.16
  10  10   0   11.98    1.60
  10  10   0    7.21    1.68
 -10  10   0    8.33    1.29
 -10  10   0    5.83    1.73
 -10  10   0    5.58    1.02
  10  10   0    5.51    1.08
  10  10   0    6.17    0.89
 -10  10   0    8.06    1.46
 -10  10   0    7.57    1.02
  10  10   0    5.03    1.63
 -10  10   0    8.13    1.66
  10  10   0    6.58    1.44
  10  10   0    4.19    1.51
  10  10   0    8.03    1.39
  10  10   0    8.73    1.13
  12 -10   0   12.61    1.90
  12 -10   0   10.61    2.46
  12 -10   0   10.11    1.76
 -12 -10   0   13.07    2.68
  12 -10   0   13.55    1.91
 -12 -10   0    9.59    1.54
 -12 -10   0    8.84    1.82
 -12 -10   0    9.78    1.89
 -12 -10   0   13.88    2.26
 -12 -10   0    4.26    2.26
  12 -10   0   14.22    2.12
  12 -10   0   11.06    1.74
  12 -10   0   12.43    2.04
  12 -10   0    8.91    1.31
 -12 -10   0   11.44    1.97
  12 -10   0    9.58    1.81
  12 -10   0   10.05    1.73
 -12  10   0    8.16    1.57
 -12  10   0   12.13    2.02
  12  10   0    8.14    1.64
  12  10   0    9.54    1.49
 -12  10   0   10.71    1.89
 -12  10   0   17.14    2.36
  12  10   0    8.66    1.23
 -12  10   0   11.85    2.44
 -12  10   0   12.65    1.40
 -12  10   0   11.10    1.51
  12  10   0   10.60    1.78
  12  10   0   12.47    2.18
  12  10   0   10.09    2.05
  12  10   0   10.46    2.20
  12  10   0   10.95    2.35
 -14 -10   0   17.92    2.77
  14 -10   0   27.73    3.17
  14 -10   0   23.55    2.82
 -14 -10   0   18.80    3.16
  14 -10   0   27.19    3.62
 -14 -10   0   22.77    2.60
 -14 -10   0   20.39    3.68
  14 -10   0   17.57    2.68
  14 -10   0   25.38    2.66
 -14 -10   0   18.73    2.82
 -14 -10   0   29.33    4.09
 -14 -10   0   14.46    2.41
 -14 -10   0   15.61    2.64
  14 -10   0   27.91    3.25
  14  10   0   19.60    3.12
  14  10   0   22.89    2.54
 -14  10   0   21.71    2.25
  14  10   0   18.07    3.39
  14  10   0   22.20    2.75
 -14  10   0   21.36    3.49
 -14  10   0   21.62    3.59
  14  10   0   18.77    2.96
  14  10   0   19.73    2.12
 -14  10   0   15.28    2.35
 -14  10   0   17.55    2.91
 -14  10   0   17.62    2.46
  14  10   0   18.55    2.31
 -14  10   0   28.67    2.97
 -14  10   0   22.78    2.55
   1 -11   0    0.21    0.65
  -1 -11   0    0.27    0.98
  -1 -11   0    0.39    0.63
   1 -11   0    0.30    0.59
   1 -11   0    0.35    0.55
   1 -11   0    1.03    0.57
   1 -11   0    0.37    0.84
  -1 -11   0    0.81    0.83
  -1 -11   0    0.40    0.74
  -1 -11   0   -0.13    0.78
  -1 -11   0    1.03    0.60
   1 -11   0   -0.60    0.75
   1 -11   0   -0.90    0.62
   1 -11   0   -0.37    0.72
  -1 -11   0    0.32    0.59
  -1 -11   0    0.87    0.86
  -1 -11   0   -0.02    0.61
   1 -11   0    0.89    0.76
   1  11   0    0.17    0.52
  -1  11   0   -0.08    0.80
   1  11   0    0.02    0.63
   1  11   0   -0.44    0.69
   1  11   0    0.03    0.83
  -1  11   0   -0.36    0.49
   1  11   0    0.05    0.55
   1  11   0   -0.16    0.42
  -1  11   0   -0.59    0.55
  -1  11   0    0.04    0.35
  -1  11   0    0.76    0.64
  -1  11   0   -0.41    0.89
   1  11   0    0.47    0.70
   1  11   0    0.93    0.80
  -1  11   0    0.34    0.69
  -1  11   0   -0.35    0.74
   1  11   0    0.78    0.99
   1  11   0    0.07    0.47
  -1  11   0   -0.25    0.82
  -1  11   0   -0.40    0.69
   1  11   0    0.04    0.75
  -1  11   0    0.56    0.62
  -3 -11   0   -0.02    0.58
  -3 -11   0   -0.17    0.85
   3 -11   0    0.32    0.70
   3 -11   0   -0.52    0.55
  -3 -11   0   -0.40    1.02
   3 -11   0    0.73    0.60
   3 -11   0    0.61    0.91
   3 -11   0   -0.17    0.70
   3 -11   0   -0.92    0.86
  -3 -11   0    0.54    0.95
  -3 -11   0    0.85    0.75
  -3 -11   0   -0.56    0.65
   3 -11   0   -0.37    1.02
  -3 -11   0    0.22    0.77
   3 -11   0   -0.46    0.68
  -3 -11   0    0.30    0.68
  -3  11   0    0.65    0.64
  -3  11   0   -0.53    0.85
   3  11   0   -0.10    0.89
   3  11   0   -0.27    0.82
  -3  11   0    0.45    0.38
   3  11   0    0.16    0.96
   3  11   0    0.34    0.72
  -3  11   0   -0.13    0.88
   3  11   0   -0.10    0.47
   3  11   0   -0.43    0.60
  -3  11   0    1.00    0.99
  -3  11   0   -0.48    0.73
   3  11   0   -0.10    0.77
  -3  11   0   -0.08    0.53
   3  11   0    0.17    0.48
  -3  11   0   -0.19    0.61
  -5 -11   0    1.24    0.96
   5 -11   0    0.12    0.73
  -5 -11   0    1.13    0.79
  -5 -11   0    0.81    0.82
   5 -11   0    0.98    1.24
   5 -11   0    0.87    0.86
   5 -11   0    1.30    1.03
  -5 -11   0    0.63    0.66
   5 -11   0    1.05    0.83
   5 -11   0    3.71    0.93
   5 -11   0    0.64    0.83
  -5 -11   0   -0.48    1.07
  -5 -11   0    0.68    1.06
   5 -11   0    0.80    0.77
  -5 -11   0    1.93    1.25
   5 -11   0    1.47    1.01
  -5 -11   0    0.69    0.81
  -5 -11   0    0.46    0.91
  -5 -11   0    1.48    1.02
  -5 -11   0    1.21    0.81
   5 -11   0    2.21    0.67
  -5  11   0    1.40    0.72
   5  11   0    0.10    0.87
   5  11   0    3.41    1.13
  -5  11   0    0.78    0.48
   5  11   0    1.43    0.81
  -5  11   0   -0.05    1.11
  -5  11   0    2.70    1.04
   5  11   0    1.75    0.94
  -5  11   0    0.64    0.75
   5  11   0    1.24    0.55
   5  11   0    2.63    1.02
  -5  11   0    0.18    0.86
  -5  11   0    0.69    0.68
   5  11   0    0.99    1.02
   5  11   0    1.01    0.68
  -5  11   0    2.32    1.05
  -5  11   0    1.12    0.93
   5  11   0    1.80    0.53
   7 -11   0    9.45    1.27
  -7 -11   0    5.75    1.40
   7 -11   0    5.46    1.16
  -7 -11   0    5.68    1.98
  -7 -11   0    6.25    1.13
  -7 -11   0    4.08    1.11
   7 -11   0    6.97    1.20
   7 -11   0    7.09    1.26
  -7 -11   0    5.56    1.11
   7 -11   0    8.30    1.44
  -7 -11   0    6.74    1.24
  -7 -11   0    5.71    1.00
  -7 -11   0    7.01    1.24
   7 -11   0    6.50    1.28
  -7 -11   0    8.96    1.25
   7 -11   0    6.42    1.28
   7 -11   0    8.15    1.17
  -7 -11   0    9.02    1.41
   7 -11   0    7.38    0.98
   7 -11   0    8.30    1.38
  -7 -11   0    7.67    1.55
  -7  11   0    5.63    1.27
  -7  11   0    7.64    1.02
   7  11   0    6.53    1.25
   7  11   0    9.64    1.23
   7  11   0   10.12    1.15
   7  11   0    8.67    1.43
  -7  11   0    9.00    1.57
  -7  11   0    5.53    1.37
  -7  11   0    4.44    1.04
  -7  11   0    5.67    1.45
   7  11   0    7.78    0.89
   7  11   0    7.30    1.01
  -7  11   0    6.30    1.13
  -7  11   0    7.14    1.22
   7  11   0    6.89    1.28
   7  11   0    5.26    0.92
  -7  11   0    8.39    0.92
   7  11   0    9.28    1.28
  -9 -11   0    0.76    1.48
   9 -11   0    1.31    1.06
  -9 -11   0    1.50    1.37
  -9 -11   0    2.06    1.06
   9 -11   0    1.54    1.02
   9 -11   0    1.02    1.63
   9 -11   0    0.11    1.35
   9 -11   0    1.16    1.42
  -9 -11   0    1.72    1.34
  -9 -11   0    2.45    1.18
   9 -11   0    2.46    1.29
  -9 -11   0    3.33    1.37
   9 -11   0    1.38    1.43
   9 -11   0    3.14    1.42
  -9 -11   0    1.36    0.93
   9 -11   0    1.42    1.03
  -9 -11   0    0.53    1.63
  -9 -11   0    1.16    1.24
   9 -11   0   -0.11    0.76
   9 -11   0    0.65    1.25
  -9 -11   0    1.38    1.06
  -9 -11   0    1.38    1.74
  -9  11   0    1.60    0.90
   9  11   0    0.54    0.65
   9  11   0    0.58    1.39
   9  11   0   -1.05    1.59
  -9  11   0   -0.09    1.62
  -9  11   0    0.21    0.94
  -9  11   0    0.89    1.52
   9  11   0    0.81    1.15
  -9  11   0    0.09    1.31
   9  11   0    1.33    1.31
   9  11   0    2.57    1.58
   9  11   0    0.50    0.81
   9  11   0    1.15    0.88
  -9  11   0    0.42    0.76
   9  11   0    1.54    1.30
  -9  11   0    1.91    1.11
  -9  11   0   -0.50    1.16
  -9  11   0    2.01    1.30
  11 -11   0    3.57    1.44
 -11 -11   0    3.65    2.14
  11 -11   0    2.66    1.46
 -11 -11   0    0.82    1.22
 -11 -11   0    4.64    1.61
  11 -11   0    4.64    1.51
  11 -11   0    4.22    1.60
 -11 -11   0    0.89    1.90
 -11 -11   0    3.42    1.76
 -11 -11   0    1.84    1.26
  11 -11   0    5.42    2.16
  11 -11   0    5.18    1.01
 -11 -11   0    3.12    1.58
  11 -11   0    2.30    1.88
  11 -11   0    2.51    2.19
 -11 -11   0   -0.22    1.61
 -11 -11   0    2.92    1.34
  11 -11   0    3.54    1.43
 -11  11   0    3.27    1.66
  11  11   0    4.97    1.51
 -11  11   0    0.99    1.71
  11  11   0    3.82    0.84
  11  11   0    3.96    1.14
  11  11   0    4.41    2.12
 -11  11   0    4.12    1.28
 -11  11   0    3.58    1.45
 -11  11   0    2.42    2.08
  11  11   0    2.44    1.70
  11  11   0    2.20    1.24
  11  11   0    6.53    1.95
 -11  11   0    4.94    1.23
  11  11   0    2.95    1.96
 -11  11   0    3.47    1.05
 -11  11   0    5.86    2.09
 -13 -11   0    3.38    2.16
  13 -11   0    6.23    2.69
  13 -11   0    4.15    1.89
  13 -11   0    6.62    1.94
  13 -11   0    6.01    1.80
  13 -11   0    7.65    1.31
 -13 -11   0    5.15    1.60
 -13 -11   0    6.08    2.18
 -13 -11   0    5.26    3.22
 -13 -11   0    3.86    1.54
 -13 -11   0    8.27    2.52
  13 -11   0    6.11    1.83
 -13 -11   0    4.15    1.68
  13 -11   0    6.24    2.90
  13 -11   0    5.39    2.00
 -13 -11   0    4.34    2.88
 -13 -11   0    3.42    1.99
  13  11   0    4.46    2.76
  13  11   0    1.94    1.66
  13  11   0    6.09    2.35
 -13  11   0    2.90    2.96
 -13  11   0    4.86    1.44
 -13  11   0    4.55    2.22
  13  11   0    3.88    1.39
  13  11   0    4.48    1.02
  13  11   0    5.72    1.91
 -13  11   0    4.47    2.12
 -13  11   0    4.67    2.89
 -13  11   0    5.58    1.66
  13  11   0    3.58    2.15
 -13  11   0    2.97    1.44
   0 -12   0    0.96    0.82
   0 -12   0    1.21    0.90
   0 -12   0    1.59    0.78
   0 -12   0    1.37    0.97
   0 -12   0    1.30    1.01
   0 -12   0    1.42    0.68
   0 -12   0    2.12    1.12
   0 -12   0    0.00    0.63
   0 -12   0   -0.20    0.90
   0  12   0    1.52    0.78
   0  12   0    1.17    0.67
   0  12   0    1.30    0.48
   0  12   0    2.72    0.81
   0  12   0    1.93    0.60
   0  12   0    2.15    0.97
   0  12   0   -0.62    1.04
   0  12   0    0.73    0.91
   0  12   0    0.88    0.76
   0  12   0   -0.26    0.91
   0  12   0    1.09    0.64
   2 -12   0   41.11    3.36
  -2 -12   0   39.36    3.62
   2 -12   0   37.56    3.33
   2 -12   0   37.67    3.28
  -2 -12   0   34.25    3.24
  -2 -12   0   38.36    3.26
   2 -12   0   42.34    3.44
  -2 -12   0   36.44    3.36
   2 -12   0   31.74    3.32
  -2 -12   0   35.87    3.38
   2 -12   0   34.55    3.36
  -2 -12   0   39.51    3.31
   2 -12   0   33.27    3.24
  -2 -12   0   37.71    3.26
  -2 -12   0   37.28    3.31
   2 -12   0   39.95    3.30
  -2 -12   0   36.28    3.31
   2 -12   0   35.72    3.37
   2  12   0   37.21    3.30
  -2  12   0   34.01    3.13
  -2  12   0   37.95    3.38
  -2  12   0   37.95    3.27
  -2  12   0   38.12    3.34
   2  12   0   36.34    3.43
  -2  12   0   34.88    3.40
   2  12   0   34.63    3.18
   2  12   0   40.33    3.29
  -2  12   0   39.51    3.24
   2  12   0   39.42    3.39
   2  12   0   32.75    3.33
   2  12   0   35.80    3.18
  -2  12   0   35.19    3.28
  -2  12   0   38.88    3.34
   2  12   0   34.63    3.24
   2  12   0   37.67    3.17
  -2  12   0   33.97    3.42
  -2  12   0   34.71    3.27
   2  12   0   44.08    3.38
  -2  12   0   34.98    3.21
  -4 -12   0   75.24    6.25
   4 -12   0   67.73    6.10
   4 -12   0   74.52    6.18
   4 -12   0   75.33    6.14
   4 -12   0   71.27    6.15
  -4 -12   0   70.70    6.19
   4 -12   0   84.82    6.25
   4 -12   0   71.68    6.13
  -4 -12   0   68.84    6.13
  -4 -12   0   74.06    6.23
  -4 -12   0   71.79    6.12
  -4 -12   0   66.77    6.07
   4 -12   0   74.10    6.12
  -4 -12   0   65.70    6.15
  -4 -12   0   71.69    6.20
  -4 -12   0   67.68    6.13
   4 -12   0   64.97    6.12
  -4  12   0   73.12    6.16
   4  12   0   72.35    6.02
  -4  12   0   67.56    6.15
  -4  12   0   73.47    6.08
  -4  12   0   72.52    6.20
   4  12   0   72.65    6.13
   4  12   0   77.43    6.20
  -4  12   0   74.08    6.09
  -4  12   0   67.46    6.18
  -4  12   0   70.58    6.22
   4  12   0   70.99    6.09
  -4  12   0   72.71    6.01
  -4  12   0   76.13    6.12
   4  12   0   70.68    6.16
   4  12   0   68.12    6.03
   4  12   0   72.13    6.12
   4  12   0   69.30    6.21
   4  12   0   67.00    6.16
  -6 -12   0    4.96    1.34
  -6 -12   0    2.40    1.54
   6 -12   0    0.24    0.92
   6 -12   0    1.08    1.09
  -6 -12   0    0.75    0.93
   6 -12   0    2.20    1.01
   6 -12   0    3.23    1.30
  -6 -12   0    2.55    1.46
   6 -12   0    0.91    1.12
   6 -12   0    2.71    1.14
   6 -12   0    2.58    0.80
   6 -12   0    3.33    1.10
   6 -12   0    3.74    0.86
  -6 -12   0    4.17    0.88
  -6 -12   0    3.45    1.12
  -6 -12   0    3.68    1.23
   6 -12   0    4.09    1.11
   6 -12   0    2.60    0.97
  -6 -12   0    3.55    1.11
  -6 -12   0    3.41    1.04
  -6 -12   0    4.60    1.16
  -6 -12   0    4.20    1.04
  -6  12   0    2.99    1.34
   6  12   0    2.79    1.18
  -6  12   0    3.80    1.44
  -6  12   0    2.41    0.86
  -6  12   0    3.35    0.97
  -6  12   0    4.51    1.38
   6  12   0    1.21    0.85
  -6  12   0    2.51    0.86
   6  12   0    4.62    1.06
   6  12   0    1.09    1.31
  -6  12   0    2.28    0.62
   6  12   0    3.26    1.42
   6  12   0    5.59    1.22
   6  12   0    3.21    1.15
   6  12   0    2.41    0.74
  -6  12   0    5.04    1.16
  -6  12   0    4.56    1.27
   6  12   0    3.29    0.70
   8 -12   0    0.12    1.69
   8 -12   0    0.42    0.98
   8 -12   0   -0.96    1.48
  -8 -12   0    0.13    0.91
  -8 -12   0   -1.67    1.33
   8 -12   0   -0.07    1.07
  -8 -12   0    0.26    1.05
   8 -12   0   -0.08    0.80
  -8 -12   0   -0.12    1.36
  -8 -12   0   -1.57    1.76
  -8 -12   0    0.31    1.13
   8 -12   0    1.28    1.30
  -8 -12   0   -1.54    1.48
   8 -12   0   -0.21    1.43
  -8 -12   0   -0.58    1.07
   8 -12   0    0.58    1.20
   8 -12   0   -0.35    1.26
  -8 -12   0    0.10    1.48
  -8 -12   0    1.23    1.29
  -8 -12   0    1.11    1.63
   8 -12   0   -0.10    1.06
   8 -12   0   -0.13    1.27
   8  12   0   -0.62    1.38
  -8  12   0   -0.14    0.70
  -8  12   0    0.55    1.53
  -8  12   0    0.39    1.61
  -8  12   0    0.52    1.68
   8  12   0    0.85    1.59
  -8  12   0    0.60    1.27
  -8  12   0   -0.08    1.06
   8  12   0   -0.02    1.33
   8  12   0    0.01    0.66
  -8  12   0   -0.39    1.33
   8  12   0    1.30    0.84
  -8  12   0   -0.69    0.93
   8  12   0    0.59    1.12
   8  12   0    1.11    1.22
   8  12   0    0.24    0.91
   8  12   0   -0.02    1.35
  -8  12   0    0.53    0.92
  10 -12   0    5.85    1.63
  10 -12   0    9.21    1.58
  10 -12   0   11.75    2.04
 -10 -12   0   10.98    1.59
 -10 -12   0   11.24    2.31
 -10 -12   0    9.56    2.11
  10 -12   0    8.38    2.29
 -10 -12   0    8.96    1.77
  10 -12   0    9.77    1.79
  10 -12   0   13.78    2.08
  10 -12   0   10.33    1.66
 -10 -12   0    8.33    1.46
  10 -12   0   13.08    1.34
 -10 -12   0    6.02    2.08
 -10 -12   0   10.29    1.83
  10 -12   0    9.29    1.58
 -10 -12   0    5.92    1.53
  10 -12   0   10.58    1.78
  10 -12   0   11.59    2.10
 -10 -12   0    8.06    2.55
 -10 -12   0    6.98    1.81
  10  12   0    6.42    1.39
  10  12   0    8.41    1.41
  10  12   0    7.68    2.06
 -10  12   0   10.26    1.34
 -10  12   0   12.76    1.98
 -10  12   0    8.36    1.47
  10  12   0    9.35    1.88
  10  12   0   10.66    1.84
  10  12   0    9.03    1.68
 -10  12   0   11.23    1.40
 -10  12   0   11.39    1.67
 -10  12   0   11.64    2.33
  10  12   0   11.08    1.18
  12 -12   0   12.79    2.18
 -12 -12   0   15.84    1.96
 -12 -12   0   11.53    2.12
  12 -12   0   13.40    1.73
  12 -12   0   19.64    2.46
 -12 -12   0   14.77    2.11
 -12 -12   0   17.11    3.40
  12 -12   0   14.13    2.12
 -12 -12   0   13.07    3.01
  12 -12   0   14.56    2.89
  12 -12   0   13.35    3.14
  12 -12   0   19.11    2.98
 -12 -12   0    9.97    2.26
 -12 -12   0   13.20    2.34
  12 -12   0   13.92    2.47
  12 -12   0   17.93    2.50
 -12 -12   0   13.79    2.43
 -12 -12   0   13.54    2.80
  12  12   0   13.70    1.73
  12  12   0   16.18    1.95
 -12  12   0   18.84    2.67
 -12  12   0   19.53    3.19
 -12  12   0   26.08    2.75
 -12  12   0   18.10    2.40
  12  12   0   12.57    2.12
 -12  12   0   20.33    2.20
  12  12   0   11.78    2.27
 -12  12   0   14.06    2.57
  12  12   0   13.41    2.81
  12  12   0   10.59    2.91
 -12  12   0   15.55    2.08
 -12  12   0   19.86    2.12
  -1 -13   0   15.20    1.31
   1 -13   0   11.85    1.39
  -1 -13   0   11.87    1.45
   1 -13   0    9.03    1.41
   1 -13   0   12.41    1.50
  -1 -13   0    8.55    1.54
   1 -13   0    9.74    1.52
   1 -13   0    9.12    1.28
   1 -13   0   12.24    1.71
   1 -13   0    8.88    1.28
   1 -13   0    7.81    1.32
  -1 -13   0   13.21    1.54
  -1 -13   0    9.11    1.56
   1 -13   0   13.37    1.28
  -1 -13   0    6.91    1.33
  -1 -13   0    9.71    1.40
  -1 -13   0   11.32    1.50
   1  13   0    9.06    1.64
  -1  13   0   11.64    1.48
  -1  13   0   10.77    1.08
  -1  13   0   10.42    1.25
  -1  13   0    9.46    1.22
  -1  13   0   15.75    1.60
   1  13   0   12.12    1.56
   1  13   0   12.08    1.42
   1  13   0   10.68    1.25
   1  13   0   14.12    1.40
  -1  13   0   10.62    1.35
  -1  13   0    9.85    1.52
   1  13   0    9.78    1.12
   1  13   0   10.12    1.24
  -1  13   0   10.52    1.36
   1  13   0   12.76    1.53
  -1  13   0    9.40    1.46
  -1  13   0   13.37    1.68
  -1  13   0   10.45    1.23
   1  13   0    7.61    1.15
   1  13   0   11.63    1.49
   1  13   0   13.26    1.57
  -3 -13   0   53.53    4.62
   3 -13   0   44.78    4.50
  -3 -13   0   53.88    4.50
   3 -13   0   50.02    4.45
  -3 -13   0   54.31    4.49
   3 -13   0   48.39    4.51
  -3 -13   0   49.52    4.50
   3 -13   0   46.67    4.41
  -3 -13   0   54.15    4.53
  -3 -13   0   51.80    4.43
  -3 -13   0   50.21    4.58
   3 -13   0   54.54    4.56
   3 -13   0   51.75    4.50
  -3 -13   0   54.86    4.62
   3 -13   0   46.77    4.49
  -3 -13   0   46.10    4.54
   3 -13   0   57.49    4.55
   3 -13   0   60.16    4.68
   3  13   0   50.75    4.38
   3  13   0   53.65    4.57
  -3  13   0   47.67    4.31
   3  13   0   52.01    4.57
  -3  13   0   55.69    4.62
   3  13   0   48.80    4.34
   3  13   0   49.88    4.65
  -3  13   0   59.41    4.66
   3  13   0   52.88    4.52
  -3  13   0   51.56    4.53
  -3  13   0   47.14    4.41
   3  13   0   53.34    4.42
  -3  13   0   49.91    4.56
  -3  13   0   52.61    4.46
  -3  13   0   51.88    4.47
  -3  13   0   41.14    4.52
   3  13   0   49.39    4.47
   3  13   0   48.11    4.54
  -5 -13   0    4.47    1.20
  -5 -13   0    6.97    1.54
  -5 -13   0    3.94    1.24
  -5 -13   0    6.60    1.03
  -5 -13   0    6.51    1.43
  -5 -13   0    4.01    1.77
  -5 -13   0    4.52    1.20
   5 -13   0    5.34    1.41
  -5 -13   0    5.80    1.20
   5 -13   0    8.74    1.38
   5 -13   0    5.64    1.30
   5 -13   0    5.77    1.10
  -5 -13   0    5.56    1.32
   5 -13   0    6.83    1.07
   5 -13   0    3.10    1.22
   5 -13   0    5.05    1.13
  -5  13   0    6.72    1.08
   5  13   0    5.10    1.34
  -5  13   0    7.18    1.67
   5  13   0    7.04    1.57
   5  13   0    6.77    1.50
  -5  13   0    4.76    0.79
   5  13   0    7.25    1.26
  -5  13   0    6.58    1.53
  -5  13   0    7.38    1.09
   5  13   0    7.02    1.63
  -5  13   0    6.44    1.20
   5  13   0    5.15    1.06
   5  13   0    4.64    0.84
  -5  13   0    6.65    1.31
  -5  13   0    7.46    1.43
   5  13   0    6.14    0.90
  -5  13   0    7.62    1.57
   7 -13   0   30.36    3.16
  -7 -13   0   20.40    2.60
  -7 -13   0   23.46    2.94
   7 -13   0   26.24    2.94
   7 -13   0   27.53    2.67
   7 -13   0   28.42    3.04
   7 -13   0   29.23    2.87
   7 -13   0   25.67    2.89
  -7 -13   0   29.18    2.77
  -7 -13   0   23.90    3.06
   7 -13   0   28.55    2.86
  -7 -13   0   28.86    2.88
   7 -13   0   25.63    2.60
  -7 -13   0   26.22    2.80
   7 -13   0   26.53    2.85
  -7 -13   0   25.80    2.72
  -7 -13   0   31.35    2.90
  -7 -13   0   21.11    2.74
  -7 -13   0   32.30    3.31
   7 -13   0   26.74    2.74
  -7 -13   0   32.33    3.18
   7 -13   0   24.61    2.76
  -7  13   0   27.84    2.62
  -7  13   0   26.63    2.72
   7  13   0   28.47    2.77
   7  13   0   25.71    2.88
  -7  13   0   31.25    3.06
  -7  13   0   27.59    2.63
   7  13   0   25.81    2.91
   7  13   0   24.57    2.93
  -7  13   0   28.19    3.08
  -7  13   0   29.95    2.46
   7  13   0   21.31    2.47
   7  13   0   27.75    2.90
  -7  13   0   27.46    2.86
  -7  13   0   29.95    3.20
   7  13   0   24.78    2.61
   7  13   0   29.53    2.49
   9 -13   0    2.33    1.33
  -9 -13   0    1.52    1.42
  -9 -13   0    2.07    1.44
  -9 -13   0    0.92    1.51
   9 -13   0    3.50    2.10
  -9 -13   0    2.99    1.19
   9 -13   0    3.64    1.77
   9 -13   0    2.38    1.58
  -9 -13   0    2.89    1.72
  -9 -13   0    3.04    1.89
   9 -13   0    2.06    0.99
   9 -13   0    3.39    1.98
   9 -13   0    3.56    1.41
   9 -13   0    2.29    1.27
   9 -13   0    1.30    1.64
   9 -13   0    0.70    1.85
  -9 -13   0    2.34    1.66
  -9 -13   0    2.10    1.32
  -9 -13   0    0.06    2.36
  -9 -13   0    7.73    2.24
  -9  13   0    1.23    1.36
  -9  13   0    4.90    1.85
   9  13   0    1.17    1.43
   9  13   0    5.56    2.12
   9  13   0    0.71    1.81
   9  13   0    4.06    2.17
   9  13   0    2.01    0.84
  -9  13   0    2.41    1.18
  -9  13   0    2.21    1.14
   9  13   0    1.57    1.63
  -9  13   0    2.78    2.06
  -9  13   0    4.60    1.62
   9  13   0    2.45    1.00
  -9  13   0    2.31    0.93
  -9  13   0    3.67    2.25
   9  13   0    1.75    1.15
 -11 -13   0    4.66    2.87
 -11 -13   0   10.39    3.32
 -11 -13   0    8.90    2.11
  11 -13   0    7.58    2.61
  11 -13   0    6.99    2.86
 -11 -13   0    7.57    1.80
  11 -13   0    5.10    1.80
 -11 -13   0    7.36    1.78
 -11 -13   0    5.66    2.11
 -11 -13   0    7.35    1.57
  11 -13   0    4.21    1.28
 -11 -13   0    7.19    2.04
  11 -13   0    7.09    1.84
  11 -13   0    5.25    2.00
 -11 -13   0   12.75    2.55
  11 -13   0    9.91    2.62
 -11  13   0   13.41    2.93
 -11  13   0    9.00    1.73
 -11  13   0   12.05    2.36
 -11  13   0    7.95    1.45
 -11  13   0    5.84    2.29
 -11  13   0    7.32    1.81
  11  13   0    6.77    1.52
  11  13   0    7.15    2.80
  11  13   0    8.70    2.13
 -11  13   0   11.78    1.56
 -11  13   0   10.89    2.37
  11  13   0    6.60    2.82
  11  13   0    7.67    1.16
  11  13   0    5.47    1.63
  11  13   0   13.64    2.52
  11  13   0    6.98    1.94
   0 -14   0   38.33    3.43
   0 -14   0   33.02    3.62
   0 -14   0   34.09    3.47
   0 -14   0   35.75    3.62
   0 -14   0   34.70    3.54
   0 -14   0   44.37    3.54
   0 -14   0   36.54    3.51
   0 -14   0   37.98    3.42
   0  14   0   37.08    3.50
   0  14   0   32.47    3.70
   0  14   0   39.97    3.73
   0  14   0   39.40    3.52
   0  14   0   38.99    3.46
   0  14   0   38.93    3.33
   0  14   0   38.55    3.23
   0  14   0   31.96    3.61
   0  14   0   37.39    3.33
   0  14   0   41.50    3.41
   2 -14   0    1.84    1.07
   2 -14   0    0.67    1.33
   2 -14   0    0.85    0.86
   2 -14   0    2.50    1.63
  -2 -14   0    1.79    1.04
   2 -14   0    1.52    0.91
  -2 -14   0    2.47    1.45
  -2 -14   0    0.94    0.82
  -2 -14   0    1.26    1.20
  -2 -14   0    1.83    1.71
   2 -14   0    2.34    1.59
   2 -14   0    1.34    1.09
  -2 -14   0   -0.78    1.46
  -2 -14   0    0.21    1.05
   2 -14   0   -0.19    1.19
  -2 -14   0    0.73    1.08
   2  14   0    2.50    1.21
  -2  14   0    1.38    0.50
  -2  14   0    2.53    1.59
   2  14   0    2.79    0.89
  -2  14   0    1.54    0.82
   2  14   0    3.48    1.22
  -2  14   0    1.02    1.05
  -2  14   0    0.04    0.86
   2  14   0    1.40    1.10
   2  14   0    1.66    0.64
   2  14   0    0.73    1.37
   2  14   0    1.43    0.68
   2  14   0    2.18    1.60
  -2  14   0    2.14    1.44
   2  14   0    1.14    1.50
  -2  14   0   -0.10    1.08
   2  14   0    1.17    0.76
  -2  14   0    0.97    1.45
  -2  14   0    0.40    1.22
  -2  14   0    1.67    0.96
  -2  14   0    0.73    1.19
   4 -14   0   10.95    1.54
  -4 -14   0   10.62    1.53
   4 -14   0   11.37    1.72
  -4 -14   0    6.28    1.45
  -4 -14   0    9.35    1.53
  -4 -14   0    7.53    1.88
   4 -14   0   12.56    1.66
  -4 -14   0    9.27    1.33
   4 -14   0    6.00    1.55
   4 -14   0   11.95    1.36
  -4 -14   0   10.20    1.84
  -4 -14   0    7.46    1.39
   4 -14   0   10.21    1.41
   4 -14   0    9.50    1.59
   4 -14   0    9.63    1.78
  -4 -14   0    6.05    1.96
  -4 -14   0   11.82    2.04
   4  14   0   10.21    1.19
  -4  14   0    7.80    1.28
   4  14   0    7.31    1.31
  -4  14   0   20.01    2.08
   4  14   0   12.56    1.92
  -4  14   0   15.01    2.16
  -4  14   0   11.50    1.63
  -4  14   0   13.21    1.89
  -4  14   0    7.83    1.48
   4  14   0   13.04    1.79
   4  14   0    7.70    1.91
   4  14   0    8.92    1.65
  -4  14   0   12.45    1.49
   4  14   0   12.00    1.45
  -4  14   0   10.16    1.14
   4  14   0    9.35    1.14
  -4  14   0   12.71    1.77
   4  14   0   12.99    1.57
  -6 -14   0    0.43    1.82
  -6 -14   0    1.40    1.72
   6 -14   0   -1.15    1.54
  -6 -14   0    1.74    1.76
   6 -14   0   -0.02    1.00
   6 -14   0   -0.13    1.06
   6 -14   0   -0.35    1.64
   6 -14   0   -0.24    1.15
   6 -14   0   -1.10    1.49
   6 -14   0   -0.04    1.37
  -6 -14   0   -0.22    1.03
  -6 -14   0    0.21    1.62
   6 -14   0   -0.58    1.25
  -6 -14   0    0.99    1.44
  -6 -14   0   -0.49    1.27
  -6 -14   0    0.11    2.14
   6 -14   0   -0.12    1.38
  -6 -14   0    1.05    1.43
   6 -14   0    1.86    1.93
   6  14   0    0.55    1.07
   6  14   0   -0.09    0.76
   6  14   0    0.94    1.09
  -6  14   0    0.05    0.66
   6  14   0    0.04    1.33
  -6  14   0    0.06    1.13
   6  14   0    0.15    0.80
  -6  14   0    2.62    1.23
   6  14   0    1.03    1.60
  -6  14   0   -0.34    1.82
   6  14   0   -0.01    1.55
  -6  14   0    0.68    1.36
  -6  14   0    3.76    1.81
   6  14   0   -1.24    1.86
   6  14   0    1.47    1.76
  -6  14   0   -0.28    1.62
  -6  14   0   -0.78    1.83
  -8 -14   0    1.18    2.41
   8 -14   0   -0.70    1.43
  -8 -14   0    0.17    1.44
  -8 -14   0    0.18    2.13
  -8 -14   0   -0.20    2.06
  -8 -14   0    2.48    2.07
   8 -14   0    2.05    1.38
   8 -14   0    0.68    2.03
  -8 -14   0    0.32    1.12
   8 -14   0    0.08    1.72
   8 -14   0    0.65    2.34
   8 -14   0    1.24    1.90
  -8 -14   0    1.80    1.70
   8 -14   0    0.45    1.26
  -8 -14   0    0.52    1.91
   8 -14   0   -0.06    1.66
  -8 -14   0   -0.52    1.44
  -8 -14   0    0.26    1.46
   8 -14   0    0.58    1.07
  -8  14   0    0.02    1.89
   8  14   0   -0.66    1.88
  -8  14   0   -1.08    2.23
   8  14   0    0.70    2.15
   8  14   0    0.07    0.85
   8  14   0    1.51    1.46
  -8  14   0   -0.02    1.41
  -8  14   0    0.35    1.30
  -8  14   0    1.90    1.64
   8  14   0   -0.30    0.96
  -8  14   0   -0.11    1.15
  -8  14   0   -0.19    0.87
   8  14   0    0.84    1.72
   8  14   0    1.46    1.16
  -8  14   0    0.63    2.18
   8  14   0   -0.96    1.62
 -10 -14   0    4.31    2.25
  10 -14   0    9.57    2.05
 -10 -14   0    3.84    1.97
  10 -14   0    4.71    1.29
  10 -14   0   12.23    1.91
 -10 -14   0    4.77    1.83
 -10 -14   0    5.30    1.75
 -10 -14   0    6.06    2.11
 -10 -14   0    6.42    1.47
 -10 -14   0    5.64    3.25
  10 -14   0    7.98    2.95
  10 -14   0   10.02    2.43
  10 -14   0    6.13    2.58
  10 -14   0    6.84    1.74
 -10 -14   0    6.06    2.90
  10 -14   0    6.53    1.76
 -10 -14   0    2.47    2.49
  10 -14   0    6.35    1.78
 -10 -14   0    3.92    2.55
  10  14   0    5.46    2.50
 -10  14   0    4.57    1.78
 -10  14   0    7.94    2.93
 -10  14   0    6.13    1.54
  10  14   0    5.98    1.11
 -10  14   0    5.53    1.98
  10  14   0    4.52    1.70
 -10  14   0    6.74    1.28
  10  14   0    8.83    2.80
  10  14   0    2.96    1.47
  10  14   0    4.93    1.51
  10  14   0    4.96    1.91
 -10  14   0    3.63    2.79
 -10  14   0    6.63    1.60
   1 -15   0   10.77    1.55
  -1 -15   0   10.84    1.72
  -1 -15   0   11.79    2.32
   1 -15   0   10.80    1.95
  -1 -15   0    8.29    1.49
   1 -15   0   15.20    2.01
   1 -15   0    9.94    1.79
  -1 -15   0   12.55    2.07
   1 -15   0   10.93    2.23
   1 -15   0    9.76    1.70
   1 -15   0   13.84    1.81
  -1 -15   0   11.47    1.73
   1 -15   0   12.50    1.58
  -1 -15   0    9.89    2.08
  -1 -15   0   14.75    2.04
   1 -15   0   15.76    2.11
  -1 -15   0   14.85    1.60
  -1  15   0   14.33    2.06
   1  15   0   11.61    1.58
  -1  15   0   13.40    1.47
   1  15   0   13.45    1.71
   1  15   0   17.28    1.81
  -1  15   0   12.05    1.71
   1  15   0   13.60    1.57
   1  15   0   12.51    1.47
   1  15   0   11.56    2.15
  -1  15   0   12.71    1.28
   1  15   0   11.87    1.30
   1  15   0   17.95    2.11
  -1  15   0   14.99    1.76
  -1  15   0   13.83    2.19
  -1  15   0    9.56    1.48
   1  15   0   12.70    1.87
  -1  15   0   13.95    1.97
   1  15   0   19.06    2.11
   1  15   0   10.10    2.00
  -1  15   0   10.35    1.85
  -1  15   0   10.15    1.44
   3 -15   0   34.63    3.35
  -3 -15   0   29.57    3.32
   3 -15   0   34.87    3.62
  -3 -15   0   32.79    3.32
  -3 -15   0   27.98    3.64
   3 -15   0   31.04    3.56
   3 -15   0   33.42    3.93
  -3 -15   0   36.30    3.67
   3 -15   0   33.87    3.21
  -3 -15   0   32.85    3.60
   3 -15   0   34.32    3.80
   3 -15   0   32.80    3.61
   3 -15   0   35.70    3.40
  -3 -15   0   34.88    3.43
  -3 -15   0   37.77    3.33
  -3 -15   0   35.05    3.21
  -3 -15   0   37.63    3.71
   3 -15   0   37.10    3.24
   3  15   0   31.61    3.42
   3  15   0   33.89    3.00
   3  15   0   36.10    3.64
  -3  15   0   35.52    3.28
   3  15   0   32.22    3.45
  -3  15   0   39.21    3.78
   3  15   0   30.89    3.07
  -3  15   0   30.21    3.63
   3  15   0   33.63    3.33
  -3  15   0   30.98    3.55
  -3  15   0   31.48    3.42
   3  15   0   32.99    3.45
   3  15   0   31.98    3.23
  -3  15   0   40.09    3.79
  -3  15   0   33.80    3.33
   3  15   0   34.85    3.02
  -3  15   0   37.39    3.29
   3  15   0   32.63    3.41
   5 -15   0   -1.11    1.39
   5 -15   0    1.45    1.91
  -5 -15   0   -0.81    1.62
  -5 -15   0   -0.92    2.00
  -5 -15   0   -0.16    1.26
  -5 -15   0    1.23    1.53
   5 -15   0    0.49    1.51
   5 -15   0    0.34    1.39
   5 -15   0   -0.37    1.71
   5 -15   0   -1.52    1.63
  -5 -15   0   -1.85    2.06
  -5 -15   0   -0.99    1.86
   5 -15   0   -1.39    1.16
  -5 -15   0   -1.53    1.77
  -5 -15   0   -0.89    1.46
  -5 -15   0   -0.35    1.11
   5 -15   0    0.77    2.19
   5  15   0   -0.78    1.89
  -5  15   0   -0.18    0.66
   5  15   0   -0.70    1.58
   5  15   0   -0.61    0.72
  -5  15   0   -1.46    2.02
  -5  15   0    1.64    2.01
  -5  15   0   -0.86    1.34
  -5  15   0   -1.91    2.12
  -5  15   0   -0.41    1.41
   5  15   0    0.21    1.09
   5  15   0   -0.52    2.27
   5  15   0    0.01    2.09
  -5  15   0   -0.12    1.09
   5  15   0    0.16    0.83
  -5  15   0   -0.41    1.97
  -7 -15   0    3.71    2.38
  -7 -15   0   -0.98    1.75
   7 -15   0   -0.59    1.71
   7 -15   0   -0.74    2.43
   7 -15   0    0.26    1.38
   7 -15   0   -0.19    1.84
   7 -15   0   -0.53    1.52
   7 -15   0   -0.06    2.14
   7 -15   0   -0.02    1.26
  -7 -15   0    1.67    2.24
   7 -15   0    1.18    1.18
  -7 -15   0   -0.50    1.84
  -7 -15   0   -1.35    2.09
  -7 -15   0   -0.25    1.16
   7 -15   0    0.65    1.71
  -7 -15   0    0.32    2.03
  -7 -15   0   -0.10    1.52
  -7 -15   0    0.63    1.47
  -7  15   0   -1.32    1.40
  -7  15   0    0.97    2.41
  -7  15   0   -0.62    1.53
   7  15   0   -3.20    2.35
  -7  15   0   -0.08    0.86
   7  15   0    0.82    0.92
  -7  15   0    0.60    3.77
   7  15   0    0.82    1.33
  -7  15   0   -0.04    1.65
   7  15   0   -0.28    1.27
   7  15   0    1.28    1.63
   7  15   0   -0.16    0.93
  -7  15   0   -0.42    1.26
  -9 -15   0    1.34    1.80
  -9 -15   0    1.36    2.33
   9 -15   0    0.41    1.81
   9 -15   0    0.46    1.22
   9 -15   0    1.04    2.71
  -9 -15   0    1.22    1.41
   9 -15   0    1.42    2.32
   9 -15   0   -0.28    1.97
  -9 -15   0    1.58    2.13
  -9 -15   0    0.55    1.72
   9 -15   0    1.60    2.01
  -9 -15   0    2.01    3.02
   9 -15   0    0.42    1.70
  -9 -15   0   -0.38    1.83
   9 -15   0   -0.30    1.59
  -9 -15   0   -0.36    2.65
  -9 -15   0    0.14    2.49
   9 -15   0   -1.16    2.67
  -9 -15   0    2.21    3.31
   9 -15   0    1.11    2.24
   9  15   0   -0.43    0.99
   9  15   0    0.99    2.65
  -9  15   0   -0.51    2.88
   9  15   0    0.58    1.46
  -9  15   0   -0.12    1.59
   9  15   0    1.59    1.89
   9  15   0   -1.66    1.98
   9  15   0   -1.59    2.55
  -9  15   0    0.02    1.43
   9  15   0   -0.43    1.21
  -9  15   0    1.59    1.60
  -9  15   0    2.47    2.80
  -9  15   0   -0.68    1.07
  -9  15   0   -0.06    1.74
   0 -16   0   15.86    2.17
   0 -16   0   12.85    2.13
   0 -16   0   15.00    2.17
   0 -16   0   22.39    2.52
   0 -16   0   14.33    1.90
   0 -16   0   18.46    2.42
   0 -16   0   17.64    2.81
   0 -16   0   16.94    1.94
   0  16   0   16.52    2.49
   0  16   0   14.70    1.58
   0  16   0   17.83    1.95
   0  16   0   15.19    2.18
   0  16   0   21.08    2.22
   0  16   0   17.00    1.84
   0  16   0   15.98    1.86
   0  16   0   13.34    3.05
  -2 -16   0    1.69    1.85
   2 -16   0    2.06    1.50
   2 -16   0    0.65    1.23
   2 -16   0    2.37    2.01
  -2 -16   0    0.97    1.10
  -2 -16   0    1.71    1.62
  -2 -16   0    1.36    2.00
   2 -16   0   -0.01    2.23
   2 -16   0    1.19    1.15
   2 -16   0    2.44    1.37
  -2 -16   0    1.55    2.36
  -2 -16   0    3.89    1.48
  -2 -16   0    2.31    1.44
   2 -16   0    3.53    1.58
  -2 -16   0    0.04    1.46
  -2 -16   0    2.09    2.10
   2 -16   0    2.39    1.83
  -2  16   0    0.60    2.17
  -2  16   0    1.34    0.63
  -2  16   0    1.58    1.54
   2  16   0    0.14    1.21
  -2  16   0    1.20    1.13
   2  16   0   -0.06    2.40
   2  16   0    1.39    0.80
  -2  16   0    2.12    1.14
   2  16   0    2.27    1.63
   2  16   0    1.29    0.76
  -2  16   0    1.47    1.95
  -2  16   0    1.49    1.17
  -2  16   0    2.05    1.60
   2  16   0    2.40    2.00
  -2  16   0    3.98    2.08
  -4 -16   0    0.69    1.99
   4 -16   0   -1.86    2.03
  -4 -16   0    1.43    2.30
   4 -16   0   -0.91    1.95
   4 -16   0    0.19    1.28
   4 -16   0   -0.67    1.30
   4 -16   0    2.14    1.91
  -4 -16   0   -1.29    2.18
  -4 -16   0    0.80    1.17
  -4 -16   0    1.15    1.53
  -4 -16   0    1.10    1.55
   4 -16   0    0.10    1.55
  -4 -16   0   -1.10    1.31
  -4 -16   0   -1.19    2.58
   4 -16   0   -0.50    1.64
  -4 -16   0   -0.05    1.62
   4 -16   0    1.48    1.65
   4  16   0   -0.38    0.89
  -4  16   0    0.09    2.34
  -4  16   0   -0.72    1.61
   4  16   0   -0.05    1.67
  -4  16   0   -0.38    1.53
  -4  16   0    0.17    0.74
  -4  16   0    0.99    1.16
   4  16   0   -1.13    1.62
  -4  16   0    0.15    1.67
   4  16   0    0.14    1.28
   4  16   0   -0.19    1.53
   4  16   0   -0.07    0.78
  -4  16   0    0.05    1.59
   4  16   0   -1.08    2.25
   6 -16   0    1.30    1.75
  -6 -16   0    4.78    2.31
   6 -16   0    1.41    1.86
   6 -16   0   -1.70    2.47
   6 -16   0    3.84    1.44
  -6 -16   0    1.83    2.34
  -6 -16   0    2.12    2.02
   6 -16   0    4.88    2.22
  -6 -16   0    1.53    1.65
  -6 -16   0    0.82    1.62
   6 -16   0    4.81    2.77
   6 -16   0    2.85    1.56
  -6 -16   0    5.38    2.60
  -6 -16   0    3.43    1.30
   6 -16   0    0.20    1.76
  -6 -16   0    2.48    2.66
   6 -16   0    4.15    1.35
  -6 -16   0   -1.87    3.02
  -6  16   0    0.37    1.65
   6  16   0    2.51    1.94
  -6  16   0    1.78    2.54
  -6  16   0    3.12    0.92
   6  16   0    1.10    1.05
   6  16   0    3.15    1.39
  -6  16   0    2.26    2.76
   6  16   0    1.47    2.59
   6  16   0    2.34    2.28
  -6  16   0    3.03    1.36
  -6  16   0    2.31    1.83
   6  16   0    3.93    2.00
   1 -17   0   -1.41    1.63
  -1 -17   0    1.06    2.37
  -1 -17   0    1.92    1.59
   1 -17   0   -0.10    1.56
  -1 -17   0   -0.77    1.60
   1 -17   0    0.31    2.82
  -1 -17   0   -1.73    1.87
   1 -17   0   -0.37    1.50
   1 -17   0   -0.83    1.43
  -1 -17   0    1.47    2.16
  -1 -17   0    0.97    1.31
  -1 -17   0    1.09    2.17
   1 -17   0   -0.71    2.36
  -1 -17   0    0.11    1.56
   1 -17   0   -0.67    1.97
   1 -17   0    1.16    1.55
  -1  17   0    0.00    1.18
   1  17   0    0.71    0.65
   1  17   0    1.51    1.35
   1  17   0   -0.04    1.13
  -1  17   0   -0.44    1.60
  -1  17   0    1.23    2.53
  -1  17   0    0.56    1.30
   1  17   0    0.48    2.29
   1  17   0   -1.41    2.47
   1  17   0    0.53    1.83
   1  17   0    0.70    1.67
  -1  17   0    0.56    1.09
   1  17   0    0.17    0.86
  -1  17   0    1.58    2.42
  -1  17   0   -0.64    1.79
  -1  17   0    1.13    2.40
  -1  17   0   -0.28    0.62
  -3 -17   0   14.59    2.08
   3 -17   0    8.85    3.02
   3 -17   0    9.75    2.68
  -3 -17   0    8.41    2.48
   3 -17   0    9.84    2.04
   3 -17   0    8.37    2.46
  -3 -17   0    7.03    2.12
   3 -17   0    5.60    1.94
  -3 -17   0    8.74    1.98
  -3 -17   0    7.51    3.11
  -3 -17   0    6.58    1.95
   3 -17   0    9.01    2.19
   3 -17   0    6.70    1.69
  -3 -17   0    4.53    1.49
  -3 -17   0    6.79    2.71
   3 -17   0   11.26    1.75
   3  17   0    8.15    1.13
  -3  17   0   12.95    1.59
   3  17   0    6.39    1.89
  -3  17   0    9.28    1.10
  -3  17   0   10.19    2.08
   3  17   0   12.87    2.80
  -3  17   0    5.43    2.64
   3  17   0    8.60    2.13
  -3  17   0    7.67    1.90
  -3  17   0    7.21    1.61
   3  17   0    8.94    1.42
   3  17   0   10.72    2.64
   3  17   0    7.57    1.10
  -3  17   0    9.14    2.08
  -3  17   0   10.28    2.86
   5 -17   0    1.85    2.09
   5 -17   0    1.10    2.36
  -5 -17   0    0.96    1.87
  -5 -17   0    0.44    2.73
  -5 -17   0    0.23    1.33
   5 -17   0    0.82    1.53
   5 -17   0    1.43    2.70
  -5 -17   0    0.09    1.85
  -5 -17   0    2.14    3.04
  -5 -17   0   -0.50    2.09
   5 -17   0    0.78    1.62
   5 -17   0    1.77    1.94
  -5 -17   0    1.50    2.49
   5 -17   0    1.12    2.34
  -5  17   0    1.03    0.88
  -5  17   0    0.70    1.78
  -5  17   0    0.57    1.40
   5  17   0    0.04    1.12
  -5  17   0    3.98    2.02
   5  17   0    0.33    0.92
   5  17   0    0.59    2.05
  -5  17   0    0.03    2.81
   5  17   0    0.23    2.83
  -5  17   0    1.32    1.98
   5  17   0    0.85    1.51
  -5  17   0   -0.73    2.87
   5  17   0   -0.17    1.83
  -5  17   0    0.69    1.89
   5  17   0   -0.31    2.68
   0 -18   0   -0.37    3.43
   0 -18   0    0.41    1.90
   0 -18   0    1.34    1.69
   0 -18   0    1.36    1.44
   0 -18   0    2.23    2.47
   0 -18   0    3.40    1.97
   0 -18   0    3.59    2.17
   0 -18   0    5.30    2.96
   0  18   0    0.85    0.68
   0  18   0    1.91    1.02
   0  18   0    3.72    1.41
   0  18   0    1.20    2.11
   0  18   0    1.74    1.59
   0  18   0    2.82    2.96
   0  18   0    1.61    1.97
  16   0  -1   -1.04    1.75
 -16   0   1   -1.05    1.51
 -16   0   1   -0.25    1.33
  16   0  -1   -0.16    0.98
 -16   0   1   -1.20    2.45
 -16   0   1   -0.15    1.95
 -16   0   1    1.56    2.08
  16   0  -1    0.05    1.89
 -16   0   1    0.91    1.29
  16   0  -1   -0.43    2.27
 -16   0   1   -0.70    1.01
  16   0  -1   -0.51    1.50
 -16   0   1   -0.99    1.59
  16   0  -1   -1.70    1.60
 -16   0   1   -0.60    1.94
  16   0  -1    0.05    0.78
  14   0  -1    0.21    1.28
 -14   0   1    0.06    0.96
  14   0  -1    0.56    1.12
  14   0  -1   -0.30    1.26
 -14   0   1    0.93    0.76
  14   0  -1   -0.32    0.60
 -14   0   1   -0.30    1.42
 -14   0   1    0.08    0.92
 -14   0   1    0.04    0.98
 -14   0   1    0.39    1.37
  14   0  -1   -0.24    1.19
 -14   0   1   -1.19    1.68
 -14   0   1    0.30    1.23
  14   0  -1    1.21    0.74
 -14   0   1    0.59    1.38
  14   0  -1    0.88    1.19
  14   0  -1   -0.11    1.57
  12   0  -1   -0.16    0.44
  12   0  -1    0.19    0.56
 -12   0   1    0.34    0.93
  12   0  -1   -0.13    0.95
 -12   0   1   -0.16    0.59
  12   0  -1    0.08    1.12
 -12   0   1    0.93    0.74
  12   0  -1   -0.49    0.69
 -12   0   1    0.48    0.94
  12   0  -1   -0.05    0.82
  12   0  -1   -0.02    0.88
 -12   0   1   -1.28    0.91
 -12   0   1    1.10    1.15
 -12   0   1   -0.56    0.99
 -12   0   1   -0.27    0.83
  12   0  -1    0.37    0.85
  10   0  -1   -0.10    0.50
 -10   0   1    1.48    0.84
 -10   0   1    0.05    0.67
  10   0  -1   -0.84    0.79
  10   0  -1   -0.50    0.64
 -10   0   1    0.20    0.71
 -10   0   1   -0.10    0.44
  10   0  -1    0.31    0.33
 -10   0   1    0.08    0.70
  10   0  -1    0.21    0.62
 -10   0   1   -0.35    0.56
  10   0  -1   -0.40    0.63
  10   0  -1    0.09    0.56
 -10   0   1   -0.06    0.77
  10   0  -1    0.39    0.42
 -10   0   1   -0.28    0.51
  -8   0   1   -0.02    0.46
   8   0  -1    0.61    0.42
   8   0  -1    0.34    0.53
  -8   0   1   -0.03    0.35
   8   0  -1    0.10    0.31
   8   0  -1   -0.53    0.43
   8   0  -1    0.27    0.24
  -8   0   1    0.02    0.41
  -8   0   1   -0.16    0.51
  -8   0   1   -0.42    0.54
  -8   0   1    0.16    0.51
  -8   0   1    0.27    0.49
   8   0  -1    0.19    0.48
   8   0  -1    0.26    0.43
  -8   0   1    0.18    0.36
  -8   0   1   -0.04    0.31
  -8   0   1    0.26    0.42
  -6   0   1    0.02    0.19
   6   0  -1   -0.12    0.37
  -6   0   1   -0.59    0.39
   6   0  -1    0.33    0.28
   6   0  -1    0.83    0.34
   6   0  -1    0.46    0.33
   6   0  -1    0.34    0.23
  -6   0   1    0.61    0.37
  -6   0   1    1.33    0.40
   6   0  -1    0.09    0.16
  -6   0   1    0.15    0.29
  -6   0   1    0.55    0.28
   6   0  -1    0.12    0.27
  -6   0   1    0.06    0.36
  -6   0   1    0.18    0.26
  -6   0   1    0.00    0.29
  -6   0   1   -0.12    0.37
  -4   0   1   -0.23    0.25
   4   0  -1   -0.04    0.14
  -4   0   1    0.27    0.19
   4   0  -1   -0.20    0.20
  -4   0   1    0.14    0.24
   4   0  -1    0.00    0.09
  -4   0   1    0.18    0.17
   4   0  -1    0.12    0.19
   4   0  -1   -0.20    0.24
   4   0  -1   -0.47    0.22
  -4   0   1   -0.02    0.21
  -4   0   1   -0.11    0.19
  -4   0   1    0.04    0.10
  -4   0   1   -0.41    0.25
  -4   0   1   -0.21    0.16
   4   0  -1    0.06    0.21
   4   0  -1   -0.18    0.25
   2   0  -1   -0.40    0.16
  -2   0   1   -0.25    0.15
  -2   0   1    0.00    0.07
   2   0  -1   -0.09    0.04
  -2   0   1   -0.05    0.04
  -2   0   1   -0.21    0.09
  -2   0   1   -0.18    0.09
   2   0  -1    0.12    0.08
   2   0  -1   -0.01    0.13
  -2   0   1   -0.12    0.10
   2   0  -1   -0.16    0.10
   2   0  -1   -0.09    0.07
  -2   0   1   -0.07    0.14
  -2   0   1   -0.17    0.11
   2   0  -1    0.23    0.11
   0   0   1   -0.82    0.07
   0   0   1   -0.98    0.04
   0   0  -1   -0.96    0.04
   0   0   1   -1.00    0.09
   0   0   1   -0.88    0.08
   2   0   1   -0.04    0.07
  -2   0  -1    0.01    0.14
   2   0   1   -0.07    0.09
  -2   0  -1   -0.19    0.17
   2   0   1   -0.05    0.13
  -2   0  -1    0.05    0.15
  -2   0  -1    0.05    0.07
   2   0   1    0.10    0.16
   2   0   1   -0.19    0.15
   2   0   1   -0.36    0.12
   2   0   1   -0.02    0.16
   2   0   1    0.38    0.17
  -2   0  -1    0.07    0.14
  -2   0  -1    0.41    0.16
  -2   0  -1   -0.10    0.08
   2   0   1    0.10    0.15
  -4   0  -1   -0.15    0.26
   4   0   1    0.12    0.19
   4   0   1    0.28    0.28
  -4   0  -1    0.10    0.23
  -4   0  -1    0.35    0.26
  -4   0  -1    0.16    0.26
  -4   0  -1   -0.05    0.28
  -4   0  -1   -0.05    0.20
   4   0   1   -0.02    0.20
  -4   0  -1    0.19    0.29
   4   0   1    0.52    0.25
   4   0   1    0.29    0.28
  -4   0  -1   -0.14    0.15
  -4   0  -1   -0.39    0.24
   4   0   1   -0.23    0.25
   4   0   1   -0.02    0.21
  -4   0  -1   -0.09    0.12
   4   0   1   -0.33    0.18
   4   0   1    0.07    0.14
   6   0   1    0.88    0.25
   6   0   1    1.62    0.29
   6   0   1    0.22    0.32
   6   0   1    0.82    0.32
  -6   0  -1    0.60    0.37
  -6   0  -1    0.40    0.37
   6   0   1    0.33    0.37
   6   0   1    0.07    0.44
  -6   0  -1    0.03    0.40
  -6   0  -1    0.57    0.31
   6   0   1    0.66    0.38
   6   0   1    0.61    0.33
  -6   0  -1    1.54    0.42
  -6   0  -1    0.79    0.38
   6   0   1    0.80    0.32
  -6   0  -1    0.21    0.26
  -6   0  -1    0.49    0.37
  -6   0  -1    0.34    0.45
   8   0   1   -0.25    0.44
  -8   0  -1    0.27    0.57
  -8   0  -1   -0.18    0.50
   8   0   1   -0.34    0.57
  -8   0  -1    0.56    0.65
   8   0   1    0.34    0.55
  -8   0  -1    0.62    0.30
  -8   0  -1    0.29    0.52
   8   0   1    0.07    0.49
   8   0   1    0.61    0.65
  -8   0  -1   -0.15    0.36
  -8   0  -1    0.84    0.54
   8   0   1    0.31    0.43
   8   0   1   -0.32    0.37
   8   0   1   -0.63    0.53
  -8   0  -1   -0.07    0.44
   8   0   1    0.66    0.36
  -8   0  -1   -0.08    0.56
 -10   0  -1    0.25    0.50
  10   0   1    0.70    0.59
 -10   0  -1   -0.27    0.80
  10   0   1    0.29    0.67
  10   0   1    0.41    0.79
 -10   0  -1    0.30    0.46
  10   0   1    0.56    0.63
 -10   0  -1    0.48    0.40
 -10   0  -1   -0.83    0.78
  10   0   1   -0.14    0.52
 -10   0  -1    1.16    0.74
 -10   0  -1   -0.62    1.09
  10   0   1   -0.10    0.96
 -10   0  -1   -0.18    0.82
 -10   0  -1   -0.13    0.71
  12   0   1    0.38    0.68
 -12   0  -1    0.57    0.69
  12   0   1   -0.78    1.04
 -12   0  -1    1.32    1.08
 -12   0  -1   -1.58    1.37
  12   0   1   -0.24    1.00
 -12   0  -1   -0.90    0.97
 -12   0  -1   -0.07    0.89
 -12   0  -1    0.61    0.99
 -12   0  -1   -0.11    0.61
 -12   0  -1   -0.51    1.21
  12   0   1   -0.16    0.92
  12   0   1   -0.61    0.73
  12   0   1    0.15    0.86
  12   0   1    1.24    1.35
 -12   0  -1   -0.48    1.21
  12   0   1   -0.30    0.99
  14   0   1   -0.69    1.03
  14   0   1    0.97    1.96
  14   0   1   -0.73    1.56
  14   0   1   -0.58    1.41
  14   0   1    0.89    1.24
  14   0   1   -1.32    1.21
 -14   0  -1   -0.80    0.79
 -14   0  -1   -1.63    1.55
 -14   0  -1   -1.54    1.74
 -14   0  -1    0.85    1.43
  14   0   1   -0.70    0.88
 -14   0  -1    0.62    1.96
 -14   0  -1   -0.08    0.73
  14   0   1    1.72    1.58
 -14   0  -1   -1.01    0.94
 -14   0  -1    0.99    1.20
 -16   0  -1    0.39    2.03
 -16   0  -1    0.06    1.01
  16   0   1    0.07    1.67
  16   0   1    0.31    1.74
 -16   0  -1   -3.00    2.79
 -16   0  -1   -0.51    2.04
  16   0   1    0.55    2.17
  16   0   1   -0.75    1.36
 -16   0  -1    1.13    1.64
 -16   0  -1    0.63    1.20
 -16   0  -1    1.66    1.87
  16   0   1   -0.26    2.14
  16   0   1   -0.19    2.88
  16   0   1    0.26    1.20
 -17  -1   1    1.04    1.90
  17  -1  -1    1.31    1.97
 -17  -1   1    1.47    1.87
 -17  -1   1    0.73    1.46
  17  -1  -1   -0.24    2.34
  17  -1  -1    0.13    2.52
  17  -1  -1    0.77    1.77
 -17  -1   1    1.37    1.22
 -17  -1   1    1.39    2.28
 -17  -1   1    0.81    3.02
  17  -1  -1    0.87    1.15
  17  -1  -1    2.07    1.98
  17  -1  -1    0.71    0.97
 -17  -1   1    1.38    1.76
 -17   1   1    0.77    1.62
 -17   1   1    0.99    2.54
  17   1  -1    1.09    1.21
  17   1  -1    1.22    1.11
  17   1  -1    0.79    2.77
  17   1  -1    1.67    1.79
  17   1  -1    1.98    2.36
  17   1  -1    1.77    1.90
 -17   1   1    2.00    1.46
 -17   1   1    2.64    1.98
  17   1  -1    0.76    0.87
 -17   1   1    1.23    3.21
 -17   1   1    3.34    2.38
 -17   1   1    1.90    1.17
 -17   1   1   -1.74    2.97
 -17   1   1    0.64    1.91
  17   1  -1    0.19    2.08
 -15  -1   1    1.04    1.97
 -15  -1   1    1.94    1.69
  15  -1  -1    3.78    0.91
 -15  -1   1    2.71    0.97
 -15  -1   1    3.06    2.04
  15  -1  -1    3.78    1.53
 -15  -1   1    4.06    1.15
 -15  -1   1    1.53    1.42
 -15  -1   1    2.06    1.63
 -15  -1   1    3.07    1.55
  15  -1  -1    2.32    0.79
  15  -1  -1    2.45    1.61
 -15  -1   1    4.01    1.75
  15  -1  -1    3.89    1.39
  15  -1  -1    5.00    1.45
 -15  -1   1    4.80    1.79
  15  -1  -1    3.17    1.78
  15  -1  -1    4.05    2.11
 -15   1   1    2.75    1.12
  15   1  -1    3.46    1.56
 -15   1   1    2.74    1.41
  15   1  -1    2.34    1.27
  15   1  -1    2.55    1.54
  15   1  -1    4.07    1.02
  15   1  -1    2.96    0.77
 -15   1   1    2.49    1.62
 -15   1   1    2.72    0.94
 -15   1   1    3.27    1.76
 -15   1   1    3.24    1.51
 -15   1   1    4.55    2.22
 -15   1   1    3.65    1.72
  15   1  -1    4.70    1.57
  15   1  -1    1.68    1.43
  15   1  -1    3.09    1.74
  15   1  -1    2.94    1.43
 -15   1   1    2.50    1.89
 -15   1   1    4.77    1.73
 -13  -1   1    4.20    1.26
  13  -1  -1    6.05    1.21
  13  -1  -1    6.88    0.86
  13  -1  -1    5.52    1.26
  13  -1  -1    5.82    0.75
 -13  -1   1    3.55    1.27
  13  -1  -1    6.96    1.22
 -13  -1   1    4.53    0.87
 -13  -1   1    3.78    1.40
 -13  -1   1    4.65    1.16
  13  -1  -1    5.23    1.16
 -13  -1   1    5.18    1.50
 -13  -1   1    7.84    1.39
 -13  -1   1    6.15    1.30
 -13  -1   1    5.10    1.01
  13  -1  -1    4.74    1.17
  13  -1  -1    4.33    1.22
 -13  -1   1    6.18    1.06
 -13   1   1    5.98    1.28
  13   1  -1    2.90    1.29
  13   1  -1    7.01    1.27
 -13   1   1    4.96    1.09
  13   1  -1    7.98    1.25
 -13   1   1    5.33    0.83
  13   1  -1    4.87    1.18
  13   1  -1    4.12    0.83
 -13   1   1    3.84    1.07
 -13   1   1    5.19    1.01
  13   1  -1    7.02    1.48
  13   1  -1    5.12    0.71
 -13   1   1    5.92    1.67
 -13   1   1    8.49    1.35
 -13   1   1    6.25    1.28
  13   1  -1    4.58    1.14
 -11  -1   1   52.93    3.86
  11  -1  -1   40.01    3.81
  11  -1  -1   46.96    3.83
 -11  -1   1   41.69    3.78
  11  -1  -1   45.95    3.82
  11  -1  -1   40.27    3.71
 -11  -1   1   43.07    3.75
  11  -1  -1   49.75    3.85
  11  -1  -1   44.13    3.90
 -11  -1   1   43.03    3.81
  11  -1  -1   46.51    3.87
 -11  -1   1   42.74    3.94
 -11  -1   1   45.85    3.86
 -11  -1   1   39.30    3.86
  11  -1  -1   41.83    3.73
 -11  -1   1   46.02    3.90
 -11  -1   1   52.69    4.25
  11   1  -1   42.96    3.81
 -11   1   1   41.73    3.77
  11   1  -1   44.38    3.91
  11   1  -1   42.65    3.80
 -11   1   1   41.30    3.75
  11   1  -1   40.15    3.84
  11   1  -1   41.78    3.74
  11   1  -1   41.90    3.85
 -11   1   1   48.10    3.84
 -11   1   1   44.15    3.85
 -11   1   1   42.88    3.87
 -11   1   1   45.64    3.86
  11   1  -1   46.02    3.70
 -11   1   1   44.41    3.76
 -11   1   1   39.72    3.89
 -11   1   1   41.52    3.81
  -9  -1   1   60.30    5.07
   9  -1  -1   59.72    5.05
  -9  -1   1   59.06    5.07
   9  -1  -1   64.75    5.07
   9  -1  -1   59.39    4.98
  -9  -1   1   59.84    5.03
   9  -1  -1   63.68    5.05
   9  -1  -1   58.29    5.06
  -9  -1   1   57.93    5.07
  -9  -1   1   59.45    5.09
  -9  -1   1   56.52    5.04
  -9  -1   1   60.05    5.03
   9  -1  -1   60.05    5.08
  -9  -1   1   57.54    5.01
  -9  -1   1   56.75    5.07
   9  -1  -1   65.58    5.04
   9  -1  -1   56.74    5.00
  -9   1   1   54.84    5.07
  -9   1   1   63.57    5.03
  -9   1   1   55.85    5.06
   9   1  -1   56.98    5.04
   9   1  -1   61.71    5.05
  -9   1   1   56.92    5.00
   9   1  -1   56.58    5.00
  -9   1   1   58.23    5.03
   9   1  -1   63.23    5.08
  -9   1   1   59.12    5.06
  -9   1   1   58.54    5.04
  -9   1   1   59.98    5.02
   9   1  -1   58.30    5.04
   9   1  -1   57.24    4.97
   9   1  -1   63.15    5.05
   9   1  -1   61.32    5.07
   9   1  -1   61.50    5.04
  -9   1   1   59.03    5.01
   7  -1  -1    1.38    0.49
   7  -1  -1    0.91    0.28
  -7  -1   1    0.70    0.35
   7  -1  -1    1.81    0.42
  -7  -1   1    1.49    0.37
  -7  -1   1    0.54    0.31
  -7  -1   1    0.87    0.45
  -7  -1   1    1.21    0.52
   7  -1  -1    1.57    0.42
  -7  -1   1    1.21    0.40
   7  -1  -1    1.95    0.42
   7  -1  -1    1.06    0.24
   7  -1  -1    1.10    0.37
  -7  -1   1    1.31    0.53
   7  -1  -1    0.67    0.43
  -7  -1   1    1.58    0.50
   7  -1  -1    2.06    0.46
   7   1  -1    1.41    0.49
   7   1  -1    0.48    0.41
  -7   1   1    0.85    0.47
   7   1  -1    0.77    0.41
  -7   1   1    0.80    0.28
  -7   1   1    1.44    0.36
   7   1  -1    1.35    0.43
   7   1  -1    1.72    0.42
   7   1  -1    0.58    0.22
  -7   1   1    1.10    0.40
  -7   1   1    1.22    0.36
   7   1  -1    1.02    0.44
   7   1  -1    1.89    0.38
  -7   1   1    0.55    0.47
  -7   1   1    1.42    0.44
  -7   1   1    1.00    0.33
  -7   1   1    1.14    0.48
   7   1  -1    1.30    0.31
   5  -1  -1   24.73    2.08
   5  -1  -1   23.18    2.07
   5  -1  -1   25.61    2.03
  -5  -1   1   25.14    2.05
   5  -1  -1   26.02    2.05
  -5  -1   1   23.35    2.07
  -5  -1   1   24.55    2.06
  -5  -1   1   23.68    2.07
  -5  -1   1   24.40    2.09
   5  -1  -1   25.42    2.06
  -5  -1   1   22.28    2.05
  -5  -1   1   25.81    2.08
  -5  -1   1   23.80    2.05
   5  -1  -1   21.69    2.07
   5  -1  -1   24.69    2.02
   5  -1  -1   25.82    2.05
   5  -1  -1   27.31    2.09
  -5  -1   1   24.55    2.04
  -5   1   1   23.43    2.08
  -5   1   1   22.79    2.04
   5   1  -1   24.61    2.06
  -5   1   1   22.07    2.05
   5   1  -1   23.93    2.02
   5   1  -1   23.07    2.05
   5   1  -1   24.80    2.07
  -5   1   1   21.82    2.06
   5   1  -1   22.58    2.07
  -5   1   1   21.18    2.07
  -5   1   1   25.81    2.06
   5   1  -1   24.35    2.08
  -5   1   1   24.95    2.03
  -5   1   1   23.52    2.09
   5   1  -1   23.21    2.06
  -5   1   1   24.68    2.05
   5   1  -1   22.61    2.03
   5   1  -1   23.50    2.04
  -3  -1   1  231.53   19.21
  -3  -1   1  231.38   19.22
   3  -1  -1  238.11   19.21
   3  -1  -1  230.14   19.21
  -3  -1   1  230.89   19.22
   3  -1  -1  231.36   19.22
  -3  -1   1  234.86   19.21
   3  -1  -1  205.96   19.21
   3  -1  -1  232.46   19.20
  -3  -1   1  240.94   19.21
  -3  -1   1  227.34   19.21
   3  -1  -1  231.78   19.20
   3  -1  -1  237.87   19.22
   3  -1  -1  227.74   19.22
  -3  -1   1  228.38   19.21
  -3  -1   1  229.42   19.21
   3  -1  -1  234.31   19.23
  -3   1   1  222.92   19.21
  -3   1   1  227.23   19.20
   3   1  -1  221.63   19.21
  -3   1   1  232.06   19.21
  -3   1   1  243.29   19.23
   3   1  -1  232.30   19.21
   3   1  -1  235.18   19.22
   3   1  -1  236.09   19.22
  -3   1   1  227.96   19.21
   3   1  -1  240.41   19.21
  -3   1   1  238.67   19.23
   3   1  -1  236.58   19.22
  -3   1   1  225.16   19.22
  -3   1   1  229.49   19.22
   3   1  -1  216.49   19.21
  -3   1   1  232.51   19.21
  -3   1   1  230.28   19.20
   1   1  -1   82.58    6.86
   1  -1   1  605.52   49.46
   1  -1   1  577.70   49.47
   1  -1   1  626.38   49.46
  -1  -1  -1  585.86   49.46
   1  -1   1  598.54   49.46
  -1  -1  -1  596.42   49.46
   1   1   1  584.25   49.46
  -1   1  -1  574.73   49.46
   1   1   1  638.16   49.46
  -1   1  -1  585.90   49.46
   1   1   1  582.46   49.46
  -3  -1  -1   11.32    1.10
   3  -1   1   13.90    1.08
  -3  -1  -1   12.40    1.05
   3  -1   1   12.07    1.09
   3  -1   1   11.35    1.06
  -3  -1  -1   12.53    1.09
  -3  -1  -1   11.29    1.07
   3  -1   1   12.15    1.10
  -3  -1  -1   11.96    1.10
  -3  -1  -1   12.06    1.09
   3  -1   1   11.66    1.10
  -3  -1  -1   12.29    1.07
  -3  -1  -1   14.42    1.11
   3  -1   1   14.91    1.10
   3  -1   1   13.10    1.08
   3  -1   1   10.52    1.09
  -3  -1  -1   14.45    1.11
  -3   1  -1   13.90    1.09
   3   1   1   14.06    1.09
   3   1   1   12.32    1.08
  -3   1  -1   11.31    1.08
   3   1   1   12.83    1.09
  -3   1  -1   11.54    1.06
  -3   1  -1   12.74    1.10
  -3   1  -1   13.00    1.10
  -3   1  -1   12.01    1.08
   3   1   1   12.06    1.09
   3   1   1   13.02    1.07
   3   1   1   14.18    1.10
  -3   1  -1   11.94    1.10
   3   1   1   11.98    1.10
  -3   1  -1   13.81    1.10
  -3   1  -1   12.15    1.10
  -3   1  -1   12.17    1.05
   3   1   1   11.92    1.07
   5  -1   1    1.11    0.30
  -5  -1  -1    0.85    0.25
  -5  -1  -1    0.72    0.38
   5  -1   1    1.45    0.28
   5  -1   1    1.09    0.24
  -5  -1  -1    0.54    0.40
  -5  -1  -1    0.69    0.25
   5  -1   1    0.90    0.29
  -5  -1  -1    0.85    0.31
   5  -1   1    0.62    0.30
   5  -1   1    0.55    0.29
   5  -1   1    1.12    0.39
   5  -1   1    0.85    0.34
  -5  -1  -1    0.66    0.31
  -5  -1  -1    0.80    0.33
  -5  -1  -1    0.35    0.37
  -5  -1  -1    0.91    0.20
  -5  -1  -1    0.71    0.20
  -5   1  -1    1.06    0.34
   5   1   1    0.85    0.23
  -5   1  -1    0.79    0.33
   5   1   1    1.89    0.35
  -5   1  -1    1.34    0.33
   5   1   1    0.86    0.32
   5   1   1    0.91    0.32
  -5   1  -1    0.42    0.30
  -5   1  -1    0.11    0.29
   5   1   1    0.69    0.26
  -5   1  -1    0.99    0.17
   5   1   1    0.94    0.36
  -5   1  -1    1.04    0.29
   5   1   1    1.25    0.39
   5   1   1    1.33    0.28
  -5   1  -1    0.36    0.35
   5   1   1    0.90    0.32
  -5   1  -1    0.60    0.20
  -5   1  -1    0.86    0.35
  -7  -1  -1   26.23    2.11
  -7  -1  -1   22.87    2.07
  -7  -1  -1   22.00    1.99
   7  -1   1   21.90    2.03
  -7  -1  -1   26.23    2.04
  -7  -1  -1   24.87    2.02
   7  -1   1   23.28    2.04
   7  -1   1   25.09    2.11
  -7  -1  -1   21.70    1.99
  -7  -1  -1   24.14    2.10
  -7  -1  -1   23.18    2.06
   7  -1   1   21.17    2.03
   7  -1   1   23.27    2.04
  -7  -1  -1   21.94    2.06
   7  -1   1   24.72    2.10
   7  -1   1   22.07    2.06
  -7  -1  -1   20.77    2.12
   7   1   1   26.00    2.07
  -7   1  -1   22.95    2.10
   7   1   1   24.46    2.05
   7   1   1   26.03    2.02
  -7   1  -1   21.56    2.07
  -7   1  -1   23.05    2.09
  -7   1  -1   22.02    1.97
  -7   1  -1   22.28    2.05
   7   1   1   26.88    2.11
  -7   1  -1   22.35    2.06
   7   1   1   24.13    2.05
  -7   1  -1   23.52    2.04
   7   1   1   23.07    2.08
  -7   1  -1   20.66    2.00
   7   1   1   22.80    2.06
   7   1   1   26.34    2.05
   7   1   1   21.91    2.05
  -7   1  -1   22.26    2.05
  -7   1  -1   21.15    2.09
  -9  -1  -1   -0.07    0.69
  -9  -1  -1   -0.30    0.55
  -9  -1  -1    0.60    0.57
   9  -1   1    0.88    0.77
  -9  -1  -1    0.91    0.62
   9  -1   1    1.10    0.56
   9  -1   1   -0.13    0.70
   9  -1   1    0.61    0.63
  -9  -1  -1    0.44    0.85
   9  -1   1    0.28    0.48
  -9  -1  -1    0.94    0.39
  -9  -1  -1    0.66    0.48
   9  -1   1   -0.13    0.46
   9  -1   1    0.76    0.51
  -9  -1  -1    0.00    0.37
  -9  -1  -1    0.00    0.68
   9  -1   1    0.65    0.50
  -9  -1  -1    1.74    0.77
   9   1   1    0.07    0.74
  -9   1  -1    0.78    0.80
   9   1   1    0.57    0.52
  -9   1  -1    1.13    0.62
  -9   1  -1    0.90    0.56
   9   1   1    0.31    0.54
  -9   1  -1   -0.03    0.53
  -9   1  -1    0.13    0.68
  -9   1  -1    0.35    0.57
   9   1   1    0.27    0.61
  -9   1  -1    0.23    0.72
   9   1   1    0.00    0.44
  -9   1  -1    0.61    0.33
   9   1   1    0.91    0.65
  -9   1  -1    0.34    0.55
   9   1   1    0.63    0.50
   9   1   1    0.33    0.50
  -9   1  -1    0.59    0.42
   9   1   1   -0.17    0.60
 -11  -1  -1   11.29    1.38
  11  -1   1    7.05    1.18
 -11  -1  -1    9.95    1.03
 -11  -1  -1   12.31    1.21
 -11  -1  -1    5.08    1.13
 -11  -1  -1    9.03    1.47
 -11  -1  -1    6.62    1.18
  11  -1   1    9.92    1.31
  11  -1   1    9.73    1.30
 -11  -1  -1   10.31    1.35
 -11  -1  -1    9.68    1.16
  11  -1   1    7.33    1.17
 -11  -1  -1    7.05    1.25
  11  -1   1    9.62    1.23
  11  -1   1    9.60    1.05
 -11   1  -1    7.58    1.40
  11   1   1    6.85    1.14
  11   1   1   10.23    1.21
 -11   1  -1    8.47    1.30
  11   1   1   13.53    1.32
 -11   1  -1    8.75    1.20
 -11   1  -1    8.64    1.20
  11   1   1    7.57    1.16
 -11   1  -1    9.28    0.98
  11   1   1    8.55    1.03
 -11   1  -1   10.15    1.35
  11   1   1    8.56    1.16
  11   1   1    9.30    1.45
 -11   1  -1   10.03    1.11
 -11   1  -1    8.11    1.20
  11   1   1   11.14    1.13
  11   1   1    9.00    1.10
 -13  -1  -1    5.22    1.32
  13  -1   1    7.40    1.34
  13  -1   1    7.41    1.06
  13  -1   1    9.08    1.47
 -13  -1  -1   10.38    1.77
 -13  -1  -1    7.78    0.95
 -13  -1  -1    6.28    1.66
  13  -1   1    6.77    1.11
  13  -1   1    7.40    1.40
 -13  -1  -1    5.03    1.50
 -13  -1  -1    6.22    1.78
  13  -1   1    5.84    1.28
  13  -1   1    7.06    1.49
 -13  -1  -1    4.29    1.23
 -13  -1  -1    6.20    0.93
 -13  -1  -1    7.16    1.32
 -13  -1  -1    5.73    1.03
 -13   1  -1    7.64    1.49
  13   1   1    7.28    1.35
 -13   1  -1    7.61    1.68
 -13   1  -1    8.00    1.36
 -13   1  -1    7.46    1.06
 -13   1  -1    4.62    1.30
  13   1   1    8.99    1.44
  13   1   1    7.30    1.08
 -13   1  -1    9.50    1.39
 -13   1  -1    9.43    1.01
  13   1   1    8.59    1.46
  13   1   1    5.97    1.09
  13   1   1    8.85    1.37
  13   1   1    7.97    1.55
 -13   1  -1    5.88    1.68
 -15  -1  -1    2.06    1.60
 -15  -1  -1    3.18    2.29
 -15  -1  -1    1.61    0.97
  15  -1   1    3.35    1.50
 -15  -1  -1    1.08    1.62
 -15  -1  -1    2.93    1.53
  15  -1   1    2.42    1.37
 -15  -1  -1    1.20    0.85
 -15  -1  -1    1.79    1.13
 -15  -1  -1    0.69    2.23
 -15  -1  -1   -0.55    1.82
  15  -1   1    1.93    1.43
  15  -1   1    0.28    1.68
  15  -1   1    1.40    2.14
  15  -1   1    1.98    1.17
  15  -1   1    0.82    1.49
 -15   1  -1    0.36    1.73
  15   1   1    2.82    1.54
 -15   1  -1   -0.61    2.40
 -15   1  -1    2.93    2.39
 -15   1  -1    1.04    1.44
  15   1   1   -0.79    2.31
 -15   1  -1    1.11    2.99
  15   1   1    1.05    1.81
 -15   1  -1    1.16    1.03
 -15   1  -1    0.54    1.88
  15   1   1    0.57    1.22
 -15   1  -1    1.56    0.94
  15   1   1    0.55    1.06
  15   1   1    0.63    1.23
  15   1   1    1.44    1.89
  15   1   1    2.33    1.43
 -15   1  -1    0.93    0.82
 -15   1  -1    2.87    1.62
  16  -2  -1   -0.34    2.01
 -16  -2   1    0.68    2.45
  16  -2  -1    1.21    2.29
 -16  -2   1   -0.02    1.07
  16  -2  -1    0.30    1.59
 -16  -2   1    0.77    1.23
  16  -2  -1    0.35    1.65
 -16  -2   1    0.01    1.87
  16  -2  -1    0.32    0.91
  16  -2  -1   -0.38    1.72
 -16  -2   1    0.42    1.64
 -16  -2   1   -0.77    2.40
 -16  -2   1    0.28    1.95
 -16  -2   1    0.52    1.89
 -16  -2   1    0.37    1.50
  16  -2  -1    1.52    0.98
 -16   2   1   -0.40    2.09
  16   2  -1   -0.23    1.78
  16   2  -1    1.19    1.72
  16   2  -1   -0.09    0.73
 -16   2   1    0.57    0.98
  16   2  -1    1.11    1.78
 -16   2   1   -0.24    1.32
 -16   2   1    0.53    1.70
  16   2  -1    2.14    1.09
 -16   2   1   -1.24    1.81
 -16   2   1    0.82    3.44
 -16   2   1   -0.54    1.92
 -16   2   1   -0.85    1.61
  16   2  -1    0.21    1.76
 -16   2   1   -0.44    2.37
 -16   2   1   -1.32    2.70
 -14  -2   1   24.00    2.34
  14  -2  -1   22.04    2.68
 -14  -2   1   20.66    2.55
  14  -2  -1   21.40    2.23
  14  -2  -1   28.05    2.64
  14  -2  -1   23.52    2.61
 -14  -2   1   24.91    2.48
 -14  -2   1   23.05    2.90
  14  -2  -1   24.64    2.82
  14  -2  -1   27.08    2.31
  14  -2  -1   26.58    2.70
 -14  -2   1   19.83    2.74
 -14  -2   1   25.57    2.59
 -14  -2   1   27.68    2.70
 -14  -2   1   25.37    2.42
 -14  -2   1   23.66    2.74
  14  -2  -1   26.51    2.59
 -14  -2   1   23.20    2.74
 -14   2   1   25.41    2.75
 -14   2   1   21.63    2.83
  14   2  -1   21.98    2.76
  14   2  -1   23.79    2.59
  14   2  -1   23.58    2.69
 -14   2   1   21.56    2.29
  14   2  -1   23.32    2.27
  14   2  -1   25.06    2.38
 -14   2   1   28.18    2.56
 -14   2   1   26.35    2.83
 -14   2   1   24.82    2.43
 -14   2   1   26.26    2.83
  14   2  -1   26.24    2.60
  14   2  -1   23.23    2.18
 -14   2   1   23.70    2.81
 -14   2   1   25.55    2.75
 -14   2   1   22.76    2.44
 -14   2   1   26.40    2.66
  14   2  -1   24.66    2.64
 -12  -2   1   72.27    6.46
  12  -2  -1   75.37    6.53
 -12  -2   1   73.34    6.46
 -12  -2   1   71.58    6.42
 -12  -2   1   77.54    6.55
 -12  -2   1   76.50    6.56
 -12  -2   1   74.62    6.53
 -12  -2   1   80.42    6.58
  12  -2  -1   80.14    6.55
  12  -2  -1   70.37    6.54
 -12  -2   1   82.88    6.52
 -12  -2   1   75.13    6.49
 -12  -2   1   83.49    6.62
  12  -2  -1   78.35    6.51
  12  -2  -1   78.61    6.51
  12  -2  -1   79.27    6.39
  12  -2  -1   72.33    6.40
  12  -2  -1   75.57    6.50
  12   2  -1   72.39    6.37
 -12   2   1   77.29    6.49
 -12   2   1   69.02    6.43
 -12   2   1   78.35    6.49
 -12   2   1   74.50    6.57
  12   2  -1   77.64    6.56
 -12   2   1   80.39    6.51
  12   2  -1   77.12    6.43
  12   2  -1   80.25    6.52
 -12   2   1   72.94    6.42
 -12   2   1   74.61    6.45
 -12   2   1   79.17    6.55
  12   2  -1   77.00    6.53
 -12   2   1   80.92    6.53
 -12   2   1   74.13    6.54
  12   2  -1   77.02    6.47
  12   2  -1   70.74    6.48
 -12   2   1   76.42    6.53
  12   2  -1   73.35    6.39
  10  -2  -1  135.61   10.88
 -10  -2   1  136.32   10.98
  10  -2  -1  138.49   10.93
  10  -2  -1  126.21   10.93
  10  -2  -1  130.12   10.95
 -10  -2   1  129.50   10.92
 -10  -2   1  133.32   10.96
 -10  -2   1  127.33   10.92
  10  -2  -1  132.70   10.95
  10  -2  -1  132.75   10.89
  10  -2  -1  128.16   10.95
 -10  -2   1  124.33   10.93
 -10  -2   1  133.84   10.96
 -10  -2   1  129.79   10.92
  10  -2  -1  131.08   10.95
  10  -2  -1  139.52   10.92
 -10  -2   1  127.45   10.97
 -10  -2   1  123.30   10.90
  10   2  -1  118.56   10.89
 -10   2   1  134.05   10.94
 -10   2   1  142.20   10.95
  10   2  -1  126.81   10.96
 -10   2   1  128.66   10.90
  10   2  -1  135.60   10.87
  10   2  -1  130.91   10.93
 -10   2   1  124.93   10.90
  10   2  -1  129.54   10.88
  10   2  -1  133.60   10.94
  10   2  -1  127.32   10.93
 -10   2   1  126.95   10.94
 -10   2   1  127.93   10.95
 -10   2   1  132.48   10.95
 -10   2   1  123.53   10.97
  10   2  -1  127.28   10.94
 -10   2   1  131.92   10.92
  10   2  -1  133.56   10.94
 -10   2   1  133.63   10.92
 -10   2   1  125.04   10.91
  10   2  -1  134.34   10.92
   8  -2  -1   33.13    2.95
   8  -2  -1   31.86    2.99
   8  -2  -1   33.88    3.00
  -8  -2   1   37.02    3.00
   8  -2  -1   32.43    2.91
  -8  -2   1   34.13    2.97
  -8  -2   1   31.09    3.00
  -8  -2   1   33.78    2.95
  -8  -2   1   29.54    2.98
   8  -2  -1   37.20    3.01
  -8  -2   1   36.21    2.96
  -8  -2   1   39.74    3.00
  -8  -2   1   32.92    2.95
   8  -2  -1   36.37    2.96
  -8  -2   1   36.13    2.95
   8  -2  -1   36.65    2.96
  -8  -2   1   34.09    3.03
   8  -2  -1   31.10    2.96
   8  -2  -1   36.19    2.91
   8   2  -1   30.07    2.95
  -8   2   1   36.95    2.93
   8   2  -1   35.85    2.97
   8   2  -1   34.28    3.00
  -8   2   1   34.17    2.94
  -8   2   1   33.97    3.00
   8   2  -1   37.52    2.98
   8   2  -1   30.88    2.90
   8   2  -1   32.36    2.99
  -8   2   1   36.29    3.00
   8   2  -1   30.66    2.96
  -8   2   1   34.51    3.00
  -8   2   1   34.19    2.94
   8   2  -1   35.05    2.90
  -8   2   1   36.40    3.01
  -8   2   1   31.55    3.01
  -8   2   1   33.26    2.94
   8   2  -1   35.23    2.94
  -8   2   1   36.51    2.99
   8   2  -1   37.19    2.95
  -8   2   1   34.71    2.97
  -6  -2   1    3.04    0.56
   6  -2  -1    3.87    0.52
   6  -2  -1    3.56    0.39
   6  -2  -1    3.01    0.38
  -6  -2   1    3.45    0.45
   6  -2  -1    4.05    0.53
  -6  -2   1    2.52    0.46
  -6  -2   1    2.67    0.45
   6  -2  -1    1.56    0.48
   6  -2  -1    3.77    0.53
  -6  -2   1    3.05    0.50
  -6  -2   1    2.43    0.46
   6  -2  -1    3.64    0.54
   6  -2  -1    4.45    0.48
  -6  -2   1    3.52    0.45
   6  -2  -1    4.29    0.48
  -6  -2   1    3.51    0.53
  -6  -2   1    3.34    0.44
  -6   2   1    2.37    0.48
   6   2  -1    3.69    0.55
  -6   2   1    2.79    0.55
   6   2  -1    3.22    0.44
  -6   2   1    3.87    0.44
  -6   2   1    3.25    0.52
  -6   2   1    3.72    0.52
  -6   2   1    3.92    0.44
  -6   2   1    4.35    0.55
   6   2  -1    5.06    0.50
  -6   2   1    1.99    0.50
   6   2  -1    3.35    0.43
   6   2  -1    5.06    0.53
  -6   2   1    3.64    0.42
   6   2  -1    3.09    0.38
   6   2  -1    3.09    0.45
   6   2  -1    3.40    0.38
   6   2  -1    3.40    0.49
   6   2  -1    3.03    0.51
  -4  -2   1  974.43   79.98
  -4  -2   1  956.78   79.96
  -4  -2   1  968.39   79.97
  -4  -2   1 1000.00   79.96
  -4  -2   1  950.17   79.97
   4  -2  -1  949.33   79.97
  -4  -2   1  944.50   79.97
  -4  -2   1  974.20   79.96
  -4  -2   1  973.70   79.97
  -4   2   1  981.73   79.97
  -4   2   1  985.84   79.95
   4   2  -1  971.16   79.97
  -4   2   1  959.43   79.98
  -4   2   1  987.40   79.98
  -4   2   1  982.42   79.97
   4   2  -1  947.73   79.96
   4   2  -1  949.04   79.96
   4   2  -1  952.59   79.97
   4   2  -1  948.61   79.96
   4   2  -1  913.27   79.94
   4   2  -1  961.45   79.98
  -2  -2   1  491.63   40.38
   2  -2  -1  484.98   40.38
  -2  -2   1  475.82   40.38
   2  -2  -1  476.12   40.39
  -2  -2   1  491.39   40.39
  -2  -2   1  477.27   40.40
  -2  -2   1  500.21   40.38
   2  -2  -1  474.24   40.38
  -2  -2   1  478.82   40.39
  -2  -2   1  468.78   40.38
  -2  -2   1  505.07   40.39
  -2  -2   1  491.81   40.39
  -2  -2   1  489.13   40.38
  -2   2   1  475.12   40.39
   2   2  -1  508.96   40.38
   2   2  -1  468.32   40.37
   2   2  -1  495.04   40.39
   2   2  -1  519.26   40.39
   2   2  -1  484.71   40.38
  -2   2   1  483.14   40.38
   2   2  -1  473.12   40.39
   2   2  -1  490.03   40.38
   0  -2  -1  125.74   10.48
   0  -2  -1  122.09   10.47
   0  -2   1  132.22   10.48
   0  -2  -1  117.92   10.49
   0  -2   1  131.81   10.47
   0  -2   1  127.67   10.48
   0  -2   1  123.90   10.48
   0  -2   1  125.64   10.47
   0  -2   1  124.80   10.47
   0  -2   1  123.27   10.47
   0  -2  -1  130.66   10.47
   0  -2  -1  125.05   10.48
   0  -2  -1  129.00   10.48
   0  -2   1  129.36   10.48
   0  -2   1  121.17   10.48
   0  -2  -1  119.42   10.48
   0  -2   1  126.28   10.48
   0  -2  -1  124.33   10.48
   0   2  -1  125.42   10.48
   0   2  -1  129.30   10.47
   0   2   1  123.75   10.47
   0   2   1  126.77   10.48
   0   2  -1  130.81   10.48
   0   2  -1  130.41   10.48
   0   2   1  124.53   10.48
   0   2   1  130.75   10.47
   0   2   1  125.77   10.48
   0   2   1  127.53   10.48
   0   2   1  124.36   10.48
   0   2  -1  125.90   10.48
   0   2   1  122.59   10.49
   0   2   1  129.38   10.48
   0   2  -1  125.12   10.48
   0   2  -1  126.78   10.47
   0   2   1  125.24   10.48
   0   2  -1  123.69   10.47
  -2  -2  -1  541.82   44.92
   2  -2   1  526.02   44.90
   2  -2   1  543.41   44.92
   2  -2   1  527.93   44.90
  -2  -2  -1  520.05   44.90
  -2  -2  -1  546.10   44.91
  -2  -2  -1  546.45   44.91
   2  -2   1  546.80   44.91
   2  -2   1  551.38   44.91
   2  -2   1  545.70   44.91
  -2  -2  -1  541.14   44.92
  -2  -2  -1  527.92   44.91
   2  -2   1  549.50   44.91
   2  -2   1  542.21   44.91
  -2  -2  -1  544.46   44.91
  -2  -2  -1  555.77   44.92
  -2  -2  -1  545.32   44.92
   2  -2   1  564.23   44.92
  -2  -2  -1  529.75   44.90
   2   2   1  555.97   44.92
  -2   2  -1  565.79   44.92
  -2   2  -1  531.98   44.91
   2   2   1  528.56   44.90
  -2   2  -1  552.44   44.90
   2   2   1  535.33   44.92
   2   2   1  549.48   44.90
   2   2   1  531.00   44.91
  -2   2  -1  540.04   44.89
   2   2   1  550.19   44.91
   2   2   1  542.05   44.92
  -2   2  -1  541.61   44.91
  -2   2  -1  525.40   44.91
   2   2   1  539.03   44.91
   2   2   1  510.06   44.92
  -4  -2  -1   40.58    3.34
   4  -2   1   41.62    3.37
  -4  -2  -1   40.60    3.36
   4  -2   1   38.50    3.35
  -4  -2  -1   39.40    3.33
   4  -2   1   38.38    3.34
  -4  -2  -1   39.07    3.34
   4  -2   1   40.53    3.37
   4  -2   1   43.59    3.36
  -4  -2  -1   39.79    3.35
   4  -2   1   41.98    3.36
  -4  -2  -1   37.11    3.35
  -4  -2  -1   38.39    3.37
   4  -2   1   42.80    3.36
  -4  -2  -1   37.68    3.36
   4  -2   1   38.91    3.35
   4  -2   1   41.32    3.35
   4   2   1   38.77    3.36
   4   2   1   43.46    3.36
   4   2   1   36.39    3.36
  -4   2  -1   40.45    3.37
   4   2   1   39.88    3.34
   4   2   1   39.50    3.35
  -4   2  -1   40.01    3.35
   4   2   1   41.20    3.34
   4   2   1   43.71    3.36
   4   2   1   39.59    3.36
  -4   2  -1   38.84    3.35
  -4   2  -1   39.44    3.32
  -4   2  -1   34.35    3.36
  -4   2  -1   42.43    3.35
  -4   2  -1   36.70    3.36
  -4   2  -1   40.79    3.36
   4   2   1   42.13    3.37
   4   2   1   41.01    3.34
  -4   2  -1   40.80    3.33
  -4   2  -1   34.63    3.33
  -6  -2  -1   95.44    7.97
  -6  -2  -1   91.95    7.94
   6  -2   1   91.39    7.98
   6  -2   1  102.38    7.97
   6  -2   1  103.20    7.97
  -6  -2  -1   93.25    7.98
  -6  -2  -1   93.33    7.94
  -6  -2  -1   96.46    7.97
   6  -2   1   92.81    7.96
  -6  -2  -1  100.14    7.95
   6  -2   1   93.35    7.95
  -6  -2  -1   92.11    7.98
   6  -2   1   91.86    7.97
  -6  -2  -1   92.30    7.98
   6  -2   1   98.18    7.97
  -6  -2  -1   95.80    7.98
   6  -2   1   97.55    7.96
  -6   2  -1   92.59    7.94
  -6   2  -1   93.73    7.97
  -6   2  -1   96.73    7.97
   6   2   1   97.34    7.96
   6   2   1   95.36    7.98
  -6   2  -1   94.26    7.98
   6   2   1   97.50    7.95
   6   2   1   91.20    7.97
  -6   2  -1   94.09    7.96
   6   2   1   95.65    7.98
  -6   2  -1   89.11    7.98
   6   2   1   93.06    7.95
  -6   2  -1   95.97    7.97
  -6   2  -1   92.15    7.96
  -6   2  -1   90.50    7.93
   6   2   1   95.82    7.97
   6   2   1  102.21    7.97
   6   2   1  106.90    7.97
  -6   2  -1   90.12    7.94
  -6   2  -1   98.82    7.97
   8  -2   1   -0.45    0.53
  -8  -2  -1   -0.23    0.47
  -8  -2  -1   -0.08    0.50
  -8  -2  -1    0.53    0.36
  -8  -2  -1    0.37    0.73
  -8  -2  -1    0.16    0.60
  -8  -2  -1   -0.56    0.60
  -8  -2  -1    0.75    0.67
   8  -2   1   -0.25    0.45
  -8  -2  -1    0.09    0.33
   8  -2   1   -0.38    0.46
  -8  -2  -1    0.21    0.45
  -8  -2  -1   -0.56    0.52
   8  -2   1   -0.46    0.41
   8  -2   1   -0.32    0.58
   8  -2   1   -0.25    0.41
   8  -2   1    0.77    0.48
   8  -2   1   -0.25    0.42
   8  -2   1    0.13    0.57
  -8   2  -1   -0.26    0.48
  -8   2  -1   -0.49    0.44
   8   2   1   -0.41    0.48
   8   2   1    0.27    0.39
  -8   2  -1   -0.05    0.47
   8   2   1    0.01    0.44
  -8   2  -1   -0.21    0.58
   8   2   1   -0.05    0.48
   8   2   1   -0.43    0.55
   8   2   1   -0.27    0.45
  -8   2  -1    0.11    0.44
  -8   2  -1   -0.11    0.25
   8   2   1   -0.51    0.41
  -8   2  -1   -0.71    0.65
  -8   2  -1   -0.79    0.52
   8   2   1    0.80    0.66
   8   2   1    0.04    0.52
  -8   2  -1    0.11    0.37
  -8   2  -1    0.10    0.40
  -8   2  -1   -0.40    0.49
 -10  -2  -1   31.01    2.92
  10  -2   1   33.21    2.79
 -10  -2  -1   30.96    2.73
  10  -2   1   33.42    2.87
 -10  -2  -1   39.04    3.01
  10  -2   1   29.86    2.79
 -10  -2  -1   31.85    2.81
 -10  -2  -1   33.53    3.07
  10  -2   1   31.91    2.84
 -10  -2  -1   32.49    2.86
  10  -2   1   32.05    2.79
 -10  -2  -1   32.58    2.87
  10  -2   1   35.90    2.93
 -10  -2  -1   30.51    2.82
 -10  -2  -1   35.57    3.02
  10  -2   1   32.82    2.84
 -10  -2  -1   36.20    2.85
  10  -2   1   28.79    2.82
  10   2   1   31.43    2.82
 -10   2  -1   34.75    2.87
 -10   2  -1   31.30    2.76
  10   2   1   30.67    2.81
 -10   2  -1   29.65    2.84
  10   2   1   31.81    2.97
 -10   2  -1   32.39    2.78
  10   2   1   29.24    2.89
 -10   2  -1   29.41    2.98
  10   2   1   34.20    2.93
  10   2   1   29.54    2.83
  10   2   1   30.61    2.78
 -10   2  -1   32.13    2.92
 -10   2  -1   29.08    2.80
 -10   2  -1   31.44    2.91
 -10   2  -1   29.72    2.70
 -10   2  -1   29.03    2.80
  10   2   1   33.51    2.81
 -10   2  -1   28.55    2.94
  10   2   1   30.20    2.92
 -12  -2  -1    7.07    0.87
  12  -2   1    6.31    1.28
  12  -2   1   11.16    1.25
  12  -2   1    7.15    1.38
 -12  -2  -1    5.83    0.94
 -12  -2  -1   10.53    1.48
 -12  -2  -1    8.08    1.23
  12  -2   1    8.53    1.02
 -12  -2  -1    6.30    1.35
 -12  -2  -1    8.33    1.16
 -12  -2  -1    8.36    1.52
 -12  -2  -1    5.31    1.02
  12  -2   1    6.55    1.04
 -12  -2  -1    7.11    1.69
 -12  -2  -1    4.68    1.02
  12  -2   1    8.77    1.23
  12  -2   1    6.23    1.25
  12  -2   1    9.69    1.26
 -12   2  -1    7.03    1.22
 -12   2  -1    6.79    1.20
  12   2   1    8.20    1.17
 -12   2  -1    5.62    0.95
  12   2   1    7.01    1.41
  12   2   1    9.05    1.13
 -12   2  -1    9.96    1.56
 -12   2  -1    6.19    0.82
 -12   2  -1    7.38    1.62
 -12   2  -1    7.54    1.44
  12   2   1    8.39    1.01
 -12   2  -1    7.05    1.23
 -12   2  -1    7.12    1.22
 -12   2  -1    6.23    1.12
  12   2   1    8.31    1.24
  12   2   1    9.20    1.55
 -12   2  -1    4.73    1.11
  12   2   1   11.79    1.42
  12   2   1    5.30    1.20
  12   2   1    9.92    1.21
 -14  -2  -1    4.78    1.88
  14  -2   1    5.38    1.61
  14  -2   1    3.46    1.62
 -14  -2  -1    3.59    0.86
 -14  -2  -1    2.37    1.11
 -14  -2  -1    3.83    0.97
  14  -2   1    3.26    1.03
  14  -2   1    2.89    1.57
 -14  -2  -1   -0.48    2.20
 -14  -2  -1    6.93    2.15
  14  -2   1    5.42    1.43
 -14  -2  -1    5.11    1.45
  14  -2   1    4.44    1.34
  14  -2   1    4.28    1.13
  14  -2   1    4.86    1.81
 -14  -2  -1    5.43    1.65
 -14  -2  -1    6.00    1.21
  14   2   1    4.34    1.59
  14   2   1    3.77    1.41
  14   2   1    4.12    1.02
 -14   2  -1    5.23    1.02
  14   2   1    2.90    1.32
 -14   2  -1    3.54    1.58
  14   2   1    3.34    2.00
 -14   2  -1    3.79    2.49
 -14   2  -1    5.83    1.93
 -14   2  -1    3.45    1.66
  14   2   1    5.07    1.68
  14   2   1    4.33    1.16
 -14   2  -1    5.28    1.30
 -14   2  -1    3.28    1.44
 -14   2  -1    4.28    2.05
 -14   2  -1    6.10    1.60
  14   2   1    5.00    1.14
  16  -2   1    2.10    1.46
 -16  -2  -1    7.42    3.07
 -16  -2  -1    3.42    2.77
 -16  -2  -1    4.12    1.91
 -16  -2  -1    3.39    1.41
  16  -2   1    2.79    1.77
 -16  -2  -1    2.85    1.20
 -16  -2  -1    6.68    2.27
  16  -2   1    2.73    2.21
  16  -2   1    2.29    2.13
  16  -2   1    4.26    2.82
 -16  -2  -1    2.44    1.77
  16  -2   1    3.33    1.82
  16  -2   1    3.36    1.26
  16   2   1    4.44    1.25
 -16   2  -1    1.60    2.01
 -16   2  -1    2.53    0.98
 -16   2  -1    2.77    2.11
  16   2   1    3.59    2.18
  16   2   1    2.90    1.40
  16   2   1    4.19    2.32
 -16   2  -1    3.40    3.16
 -16   2  -1    3.16    1.68
  16   2   1    2.26    1.77
  16   2   1    2.33    1.71
 -16   2  -1    4.03    1.31
 -16   2  -1    1.55    3.04
  16   2   1    3.03    1.45
  16   2   1    3.59    2.93
 -17  -3   1    3.41    2.38
 -17  -3   1    1.96    1.98
 -17  -3   1    2.24    2.33
 -17  -3   1    1.91    1.75
 -17  -3   1    0.79    1.40
 -17  -3   1    0.16    3.23
  17  -3  -1    0.78    1.12
 -17  -3   1   -1.45    2.49
  17  -3  -1    2.55    2.84
 -17  -3   1    0.35    2.25
  17  -3  -1    1.36    1.66
 -17  -3   1    1.73    1.32
  17  -3  -1    3.99    1.84
  17  -3  -1    4.60    2.17
  17  -3  -1    0.68    1.91
  17  -3  -1    3.32    2.55
 -17   3   1    1.55    1.58
 -17   3   1   -3.19    3.29
  17   3  -1    1.28    0.90
  17   3  -1    1.14    2.02
 -17   3   1   -4.16    3.15
 -17   3   1    0.20    2.01
 -17   3   1    2.10    2.20
  17   3  -1    2.82    1.28
  17   3  -1    4.10    2.06
  17   3  -1    3.32    2.58
 -17   3   1    1.02    2.33
  17   3  -1    2.17    1.51
 -17   3   1    2.17    1.19
  17   3  -1    2.36    2.85
  17   3  -1    1.63    2.04
 -17   3   1    2.53    2.02
 -17   3   1    1.14    4.14
 -15  -3   1    2.15    1.69
  15  -3  -1    2.40    0.87
 -15  -3   1    1.84    2.08
 -15  -3   1    0.96    1.85
  15  -3  -1    3.30    1.96
  15  -3  -1    0.51    1.63
  15  -3  -1    2.21    0.89
 -15  -3   1    0.75    1.12
 -15  -3   1   -0.54    1.71
 -15  -3   1    2.24    1.06
  15  -3  -1    1.87    1.73
 -15  -3   1    1.99    1.09
  15  -3  -1    0.64    1.43
  15  -3  -1    4.38    1.45
 -15  -3   1    0.71    1.64
 -15  -3   1    1.90    2.33
 -15   3   1    2.00    1.65
 -15   3   1    1.72    1.83
  15   3  -1    1.38    0.68
 -15   3   1    2.73    1.58
  15   3  -1    2.73    1.56
 -15   3   1    2.41    2.18
 -15   3   1    1.07    1.22
 -15   3   1    4.11    2.25
 -15   3   1    2.04    1.37
  15   3  -1    2.32    1.72
  15   3  -1    3.85    1.51
 -15   3   1    3.12    1.62
 -15   3   1    3.00    1.68
  15   3  -1    2.60    1.02
  15   3  -1    0.77    1.50
  15   3  -1    1.67    0.75
 -15   3   1    1.35    1.17
 -15   3   1    1.97    0.87
  15   3  -1    5.19    2.35
  13  -3  -1   17.87    1.94
  13  -3  -1   15.54    1.91
 -13  -3   1   13.98    2.21
 -13  -3   1   16.51    1.92
  13  -3  -1   15.02    1.65
 -13  -3   1   17.09    1.73
 -13  -3   1   15.35    1.78
 -13  -3   1   16.22    1.74
  13  -3  -1   18.80    1.99
 -13  -3   1   14.35    1.85
  13  -3  -1   19.40    2.02
  13  -3  -1   17.48    2.06
 -13  -3   1   14.66    2.07
  13  -3  -1   16.70    1.97
 -13  -3   1   14.45    1.86
  13  -3  -1   13.88    1.91
 -13  -3   1   15.11    1.98
 -13  -3   1   14.34    1.95
  13   3  -1   21.23    1.91
 -13   3   1   14.96    1.78
  13   3  -1   18.01    1.97
 -13   3   1   19.04    2.04
 -13   3   1   15.57    1.88
 -13   3   1   18.43    1.94
  13   3  -1   18.55    1.94
 -13   3   1   16.72    1.88
  13   3  -1   17.26    2.08
 -13   3   1   15.07    1.73
  13   3  -1   14.61    1.55
  13   3  -1   17.07    1.89
 -13   3   1   20.04    2.01
 -13   3   1   14.15    1.66
  13   3  -1   14.59    1.74
  13   3  -1   14.92    1.58
  13   3  -1   18.54    1.87
 -13   3   1   12.94    2.06
  13   3  -1   19.05    1.83
 -13   3   1   20.85    2.20
  11  -3  -1    4.63    1.04
  11  -3  -1    2.36    0.76
 -11  -3   1    1.24    0.88
 -11  -3   1    3.91    0.68
  11  -3  -1    3.24    0.87
 -11  -3   1    2.26    0.72
  11  -3  -1    3.15    0.89
  11  -3  -1    2.24    0.55
 -11  -3   1    3.32    1.00
 -11  -3   1    1.78    1.00
  11  -3  -1    4.47    0.86
 -11  -3   1    3.58    1.20
 -11  -3   1    0.88    1.05
  11  -3  -1    1.94    0.85
  11  -3  -1    2.91    0.59
 -11  -3   1    3.38    0.84
 -11  -3   1    2.47    0.85
 -11  -3   1    1.56    0.73
  11   3  -1    1.90    1.01
 -11   3   1    2.38    0.89
 -11   3   1    3.12    0.99
 -11   3   1    4.12    1.09
 -11   3   1    2.20    0.94
  11   3  -1    4.10    0.99
 -11   3   1    2.23    0.71
  11   3  -1    3.53    0.82
 -11   3   1    1.34    0.85
 -11   3   1    2.80    0.70
  11   3  -1    2.36    0.48
  11   3  -1    2.52    0.93
 -11   3   1    3.51    1.12
  11   3  -1    2.86    0.64
 -11   3   1    1.12    0.68
  11   3  -1    4.21    0.54
 -11   3   1    2.76    0.85
  11   3  -1    2.14    0.86
 -11   3   1    3.35    0.92
  11   3  -1    1.99    0.91
  11   3  -1    2.08    0.89
  -9  -3   1    2.88    0.73
   9  -3  -1    3.08    0.66
  -9  -3   1    3.95    0.88
   9  -3  -1    3.03    0.72
   9  -3  -1    3.20    0.67
  -9  -3   1    4.06    0.65
  -9  -3   1    2.31    0.82
  -9  -3   1    2.72    0.64
   9  -3  -1    2.54    0.78
   9  -3  -1    3.49    0.70
  -9  -3   1    3.99    0.67
   9  -3  -1    3.76    0.72
  -9  -3   1    2.56    0.54
   9  -3  -1    3.11    0.75
   9  -3  -1    3.54    0.50
  -9  -3   1    3.75    0.60
   9  -3  -1    4.23    0.49
  -9  -3   1    3.92    0.78
  -9  -3   1    4.13    0.79
  -9   3   1    1.36    0.49
   9   3  -1    1.64    0.63
  -9   3   1    2.44    0.61
   9   3  -1    3.22    0.72
  -9   3   1    2.40    0.54
  -9   3   1    2.83    0.69
  -9   3   1    2.25    0.64
   9   3  -1    3.92    0.71
  -9   3   1    2.08    0.66
  -9   3   1    3.67    0.85
   9   3  -1    4.21    0.56
   9   3  -1    3.48    0.68
   9   3  -1    3.60    0.70
  -9   3   1    2.80    0.55
  -9   3   1    3.35    0.73
   9   3  -1    2.31    0.44
   9   3  -1    3.88    0.46
   9   3  -1    2.96    0.73
  -9   3   1    1.84    0.72
  -9   3   1    5.77    0.86
  -7  -3   1  125.87   10.59
   7  -3  -1  122.16   10.62
  -7  -3   1  126.54   10.61
  -7  -3   1  120.59   10.60
   7  -3  -1  127.67   10.57
  -7  -3   1  127.62   10.60
  -7  -3   1  117.84   10.59
   7  -3  -1  130.27   10.62
   7  -3  -1  133.62   10.61
   7  -3  -1  127.36   10.61
   7  -3  -1  121.64   10.61
  -7  -3   1  134.04   10.61
  -7  -3   1  123.82   10.62
  -7  -3   1  129.20   10.62
   7  -3  -1  126.08   10.57
  -7  -3   1  123.62   10.59
   7  -3  -1  124.37   10.60
   7  -3  -1  131.43   10.63
  -7   3   1  131.35   10.60
  -7   3   1  131.70   10.59
   7   3  -1  120.71   10.56
  -7   3   1  128.97   10.61
   7   3  -1  132.70   10.57
   7   3  -1  132.27   10.59
  -7   3   1  129.05   10.61
  -7   3   1  123.30   10.61
   7   3  -1  121.81   10.61
   7   3  -1  118.39   10.61
  -7   3   1  124.78   10.62
  -7   3   1  131.76   10.58
   7   3  -1  127.77   10.59
  -7   3   1  132.60   10.61
   7   3  -1  127.32   10.61
   7   3  -1  133.09   10.62
  -7   3   1  131.59   10.60
   7   3  -1  123.71   10.60
   7   3  -1  121.72   10.60
  -7   3   1  126.86   10.62
  -5  -3   1   10.98    1.03
   5  -3  -1   10.24    1.02
  -5  -3   1   11.87    1.01
  -5  -3   1   12.40    1.03
  -5  -3   1    9.99    1.06
  -5  -3   1   10.98    1.07
  -5  -3   1   10.32    1.02
  -5  -3   1   11.28    1.05
   5  -3  -1   11.87    1.03
   5  -3  -1   12.04    1.04
  -5  -3   1   11.19    1.02
   5  -3  -1   11.45    1.07
   5  -3  -1   10.50    1.04
   5  -3  -1   11.50    1.03
   5  -3  -1   12.28    1.07
   5  -3  -1    9.42    0.97
  -5  -3   1    9.43    1.08
   5  -3  -1   12.28    0.99
   5  -3  -1   10.38    1.01
  -5  -3   1   11.24    0.98
  -5   3   1    9.79    1.01
  -5   3   1   12.20    1.00
  -5   3   1   10.30    0.99
  -5   3   1   10.61    1.05
  -5   3   1   11.11    1.06
   5   3  -1    9.98    1.03
   5   3  -1   12.08    1.05
  -5   3   1   11.55    1.00
  -5   3   1   13.21    1.07
  -5   3   1   10.53    1.06
  -5   3   1   10.83    1.06
   5   3  -1    9.83    1.03
   5   3  -1   11.36    0.96
   5   3  -1   10.46    1.01
  -5   3   1   11.07    1.02
   5   3  -1   10.94    1.06
   5   3  -1   11.23    1.04
   5   3  -1   13.67    1.00
  -3  -3   1    2.85    0.28
  -3  -3   1    2.81    0.33
   3  -3  -1    2.73    0.30
  -3  -3   1    3.03    0.35
  -3  -3   1    1.60    0.30
   3  -3  -1    2.26    0.33
   3  -3  -1    1.77    0.34
   3  -3  -1    2.13    0.36
   3  -3  -1    3.34    0.37
  -3  -3   1    2.40    0.33
  -3  -3   1    2.98    0.32
  -3  -3   1    2.09    0.33
  -3  -3   1    2.48    0.34
   3  -3  -1    1.40    0.36
   3  -3  -1    3.38    0.36
   3  -3  -1    2.65    0.38
  -3  -3   1    2.64    0.40
   3  -3  -1    2.32    0.26
   3  -3  -1    1.82    0.31
  -3  -3   1    2.76    0.28
   3   3  -1    2.78    0.27
   3   3  -1    4.04    0.38
  -3   3   1    3.23    0.37
  -3   3   1    1.85    0.30
   3   3  -1    1.99    0.25
  -3   3   1    2.54    0.34
  -3   3   1    2.50    0.35
   3   3  -1    2.65    0.35
  -3   3   1    2.31    0.31
   3   3  -1    2.56    0.31
  -3   3   1    2.45    0.28
   3   3  -1    2.22    0.34
   3   3  -1    2.59    0.31
  -3   3   1    1.95    0.32
   3   3  -1    2.43    0.32
   3   3  -1    3.25    0.34
  -3   3   1    3.78    0.37
  -3   3   1    2.02    0.36
   1  -3  -1  310.67   26.21
   1  -3  -1  323.65   26.22
  -1  -3   1  319.04   26.21
   1  -3  -1  315.14   26.20
  -1  -3   1  317.65   26.21
  -1  -3   1  314.27   26.22
  -1  -3   1  312.95   26.22
   1  -3  -1  307.76   26.21
  -1  -3   1  327.73   26.22
   1  -3  -1  320.58   26.22
  -1  -3   1  319.16   26.21
  -1  -3   1  322.64   26.22
   1  -3  -1  308.06   26.21
   1  -3  -1  314.76   26.22
   1  -3  -1  315.04   26.23
   1  -3  -1  320.14   26.22
  -1  -3   1  318.35   26.21
  -1  -3   1  313.05   26.22
   1   3  -1  315.30   26.21
   1   3  -1  314.22   26.21
  -1   3   1  322.34   26.20
   1   3  -1  313.00   26.22
  -1   3   1  306.93   26.21
   1   3  -1  320.47   26.22
  -1   3   1  313.50   26.22
  -1   3   1  312.90   26.21
   1   3  -1  307.87   26.22
  -1   3   1  306.52   26.22
  -1   3   1  322.06   26.21
  -1   3   1  318.79   26.22
  -1   3   1  304.41   26.21
   1   3  -1  315.01   26.22
  -1   3   1  319.50   26.22
   1   3  -1  319.13   26.21
  -1   3   1  313.06   26.22
  -1  -3  -1    3.40    0.46
   1  -3   1    3.90    0.42
  -1  -3  -1    4.34    0.42
   1  -3   1    4.72    0.40
  -1  -3  -1    3.67    0.39
  -1  -3  -1    4.29    0.45
   1  -3   1    5.16    0.46
  -1  -3  -1    4.39    0.47
   1  -3   1    4.02    0.45
   1  -3   1    4.27    0.44
   1  -3   1    4.50    0.43
   1  -3   1    5.14    0.46
  -1  -3  -1    4.66    0.47
  -1  -3  -1    3.86    0.42
   1  -3   1    3.75    0.45
   1  -3   1    3.74    0.42
  -1  -3  -1    5.71    0.45
  -1  -3  -1    4.33    0.48
   1  -3   1    4.79    0.39
  -1  -3  -1    4.19    0.44
   1   3   1    4.12    0.42
   1   3   1    4.50    0.41
   1   3   1    4.54    0.44
   1   3   1    4.50    0.43
  -1   3  -1    5.24    0.39
  -1   3  -1    3.73    0.43
  -1   3  -1    4.91    0.43
   1   3   1    4.27    0.46
  -1   3  -1    4.21    0.46
   1   3   1    3.75    0.41
   1   3   1    5.18    0.47
   1   3   1    3.30    0.46
   1   3   1    4.55    0.45
  -1   3  -1    4.50    0.40
  -1   3  -1    3.74    0.43
  -1   3  -1    3.18    0.44
  -1   3  -1    4.52    0.44
   3  -3   1  574.37   47.58
  -3  -3  -1  577.97   47.57
  -3  -3  -1  583.27   47.59
   3  -3   1  584.42   47.58
   3  -3   1  549.59   47.56
   3  -3   1  565.14   47.58
   3  -3   1  545.80   47.59
  -3  -3  -1  587.51   47.58
   3  -3   1  570.17   47.59
   3  -3   1  572.04   47.58
  -3  -3  -1  565.36   47.59
  -3  -3  -1  563.89   47.57
   3  -3   1  574.11   47.58
  -3  -3  -1  565.55   47.56
  -3  -3  -1  588.63   47.58
   3  -3   1  564.07   47.57
  -3  -3  -1  583.65   47.59
  -3  -3  -1  566.60   47.59
  -3  -3  -1  559.81   47.58
   3  -3   1  606.90   47.57
   3   3   1  582.52   47.57
   3   3   1  564.11   47.58
   3   3   1  552.55   47.58
   3   3   1  574.72   47.58
   3   3   1  568.59   47.57
  -3   3  -1  564.72   47.57
  -3   3  -1  555.20   47.58
   3   3   1  570.93   47.57
   3   3   1  571.65   47.59
   3   3   1  586.19   47.57
  -3   3  -1  589.09   47.57
  -3   3  -1  579.76   47.58
  -3   3  -1  582.28   47.56
  -3   3  -1  561.81   47.57
   3   3   1  597.35   47.58
  -3   3  -1  573.34   47.58
   3   3   1  603.57   47.58
  -3   3  -1  574.80   47.58
  -3   3  -1  546.21   47.60
   5  -3   1   22.29    1.91
   5  -3   1   19.22    1.87
   5  -3   1   20.05    1.89
  -5  -3  -1   21.70    1.91
  -5  -3  -1   20.39    1.89
  -5  -3  -1   20.25    1.91
   5  -3   1   21.12    1.90
   5  -3   1   23.17    1.86
   5  -3   1   23.45    1.88
   5  -3   1   21.28    1.88
  -5  -3  -1   20.05    1.89
  -5  -3  -1   20.75    1.86
   5  -3   1   22.70    1.87
  -5  -3  -1   19.75    1.86
  -5  -3  -1   20.06    1.92
  -5  -3  -1   21.34    1.89
  -5  -3  -1   20.60    1.84
   5  -3   1   24.23    1.89
  -5   3  -1   22.08    1.91
  -5   3  -1   21.33    1.89
  -5   3  -1   24.21    1.87
  -5   3  -1   22.68    1.93
  -5   3  -1   21.17    1.84
   5   3   1   21.04    1.87
   5   3   1   20.75    1.88
   5   3   1   18.65    1.90
  -5   3  -1   22.71    1.85
  -5   3  -1   22.03    1.91
   5   3   1   22.59    1.86
  -5   3  -1   20.96    1.89
   5   3   1   21.06    1.87
  -5   3  -1   20.85    1.90
   5   3   1   21.08    1.89
   5   3   1   24.78    1.88
   5   3   1   21.05    1.86
   5   3   1   23.33    1.93
   5   3   1   24.18    1.89
  -7  -3  -1   16.53    1.82
   7  -3   1   18.12    1.69
  -7  -3  -1   18.82    1.69
   7  -3   1   19.13    1.73
   7  -3   1   17.84    1.78
   7  -3   1   18.06    1.74
   7  -3   1   19.92    1.71
  -7  -3  -1   17.44    1.65
  -7  -3  -1   17.78    1.73
   7  -3   1   19.60    1.79
   7  -3   1   22.11    1.89
  -7  -3  -1   18.55    1.74
  -7  -3  -1   17.83    1.76
  -7  -3  -1   18.89    1.68
  -7  -3  -1   18.28    1.73
   7  -3   1   19.44    1.69
  -7  -3  -1   17.03    1.77
   7  -3   1   20.71    1.72
   7   3   1   17.61    1.69
   7   3   1   20.18    1.70
  -7   3  -1   19.66    1.81
  -7   3  -1   18.94    1.72
   7   3   1   19.25    1.73
  -7   3  -1   20.51    1.78
  -7   3  -1   21.05    1.77
   7   3   1   17.71    1.74
   7   3   1   19.12    1.72
   7   3   1   19.37    1.71
  -7   3  -1   20.12    1.79
  -7   3  -1   19.18    1.66
  -7   3  -1   20.31    1.72
  -7   3  -1   17.61    1.62
   7   3   1   18.36    1.73
  -7   3  -1   19.08    1.67
  -7   3  -1   21.30    1.73
   7   3   1   18.50    1.71
   7   3   1   19.49    1.72
   7   3   1   22.32    1.80
  -7   3  -1   17.39    1.72
  -9  -3  -1    8.24    1.20
   9  -3   1   11.85    1.22
  -9  -3  -1    8.09    1.10
  -9  -3  -1    8.71    1.15
  -9  -3  -1    9.93    1.00
   9  -3   1   11.43    1.15
   9  -3   1   11.02    1.14
   9  -3   1    9.77    1.18
   9  -3   1   10.84    1.25
  -9  -3  -1    8.69    1.30
  -9  -3  -1    9.06    1.13
   9  -3   1   10.63    1.22
   9  -3   1    9.77    1.10
   9  -3   1    9.82    1.11
  -9  -3  -1   10.09    1.18
  -9  -3  -1   11.45    1.27
  -9  -3  -1    8.17    1.09
  -9  -3  -1    9.60    1.17
   9  -3   1    7.19    1.01
   9   3   1    8.60    1.12
  -9   3  -1    7.55    1.08
  -9   3  -1    8.67    1.06
  -9   3  -1    9.25    1.30
  -9   3  -1   10.48    1.09
   9   3   1   10.55    1.09
   9   3   1   12.03    1.11
  -9   3  -1   11.37    1.28
   9   3   1    8.96    1.08
   9   3   1    8.13    1.10
   9   3   1    9.58    1.17
   9   3   1    7.74    1.24
   9   3   1    9.06    1.10
  -9   3  -1   10.41    1.03
   9   3   1    9.78    1.12
  -9   3  -1   11.23    1.21
  -9   3  -1   11.52    1.22
  -9   3  -1   10.90    0.93
   9   3   1   11.66    1.17
  -9   3  -1   10.90    1.15
 -11  -3  -1    3.73    0.89
 -11  -3  -1    2.59    0.68
 -11  -3  -1    2.29    0.94
 -11  -3  -1    3.16    1.24
  11  -3   1    2.15    0.68
  11  -3   1    2.14    0.97
  11  -3   1    3.35    0.77
 -11  -3  -1    3.77    0.96
  11  -3   1    3.56    0.77
 -11  -3  -1    3.19    1.35
 -11  -3  -1    3.30    1.11
  11  -3   1    4.71    1.18
 -11  -3  -1    3.24    0.95
  11  -3   1    4.46    1.12
  11  -3   1    2.32    0.96
  11  -3   1    4.30    0.98
  11  -3   1    2.62    0.90
 -11  -3  -1    4.25    1.11
 -11  -3  -1    2.68    0.61
 -11   3  -1    1.72    0.83
 -11   3  -1    3.80    0.89
  11   3   1    3.50    1.06
 -11   3  -1    3.23    0.97
 -11   3  -1    4.44    1.13
  11   3   1    5.13    0.96
 -11   3  -1    3.23    0.51
  11   3   1    2.51    0.79
  11   3   1    3.71    0.94
 -11   3  -1    4.31    1.28
  11   3   1    3.95    0.86
 -11   3  -1    3.08    0.89
 -11   3  -1    2.36    0.89
  11   3   1    2.80    0.88
  11   3   1    3.41    0.73
  11   3   1    2.74    1.32
 -11   3  -1    2.44    0.67
 -11   3  -1    2.34    1.28
 -11   3  -1    2.79    0.74
  11   3   1    3.50    0.90
  11   3   1    3.18    1.08
 -13  -3  -1    1.57    1.15
 -13  -3  -1    0.87    1.11
  13  -3   1    1.42    0.93
 -13  -3  -1    2.37    0.71
 -13  -3  -1    3.77    1.70
 -13  -3  -1    1.36    1.02
 -13  -3  -1    1.54    1.15
  13  -3   1    2.46    1.23
  13  -3   1    0.44    1.56
 -13  -3  -1    1.08    0.80
  13  -3   1    0.86    0.82
 -13  -3  -1    1.98    1.56
  13  -3   1    1.50    1.32
 -13  -3  -1    4.35    1.86
  13  -3   1    1.89    1.29
  13  -3   1    1.15    1.10
 -13  -3  -1   -0.33    1.36
  13   3   1    1.60    1.21
  13   3   1    0.49    1.33
 -13   3  -1    2.62    0.98
 -13   3  -1    3.61    1.80
  13   3   1    2.15    1.43
 -13   3  -1    2.24    1.39
  13   3   1    0.44    1.12
 -13   3  -1    1.27    1.74
  13   3   1   -0.47    1.18
 -13   3  -1    1.68    1.08
 -13   3  -1    2.46    1.13
 -13   3  -1    2.55    0.80
  13   3   1    0.02    0.81
 -13   3  -1   -0.68    1.50
 -13   3  -1    0.87    0.56
  13   3   1    1.71    0.92
  13   3   1    2.60    1.66
  13   3   1    1.62    1.23
 -13   3  -1    2.13    1.06
 -13   3  -1    0.67    1.11
  13   3   1    1.91    0.94
 -15  -3  -1    0.32    2.70
  15  -3   1   -0.10    1.33
  15  -3   1    0.68    2.31
 -15  -3  -1    1.07    2.53
 -15  -3  -1    0.89    1.89
 -15  -3  -1   -0.75    1.06
 -15  -3  -1   -0.15    1.58
  15  -3   1    1.38    1.61
  15  -3   1   -0.21    1.86
 -15  -3  -1    0.16    1.34
  15  -3   1   -0.28    1.64
  15  -3   1    0.45    1.17
  15  -3   1   -1.04    1.82
 -15  -3  -1    0.25    1.50
 -15  -3  -1    1.50    1.61
 -15   3  -1   -0.14    2.92
 -15   3  -1    3.80    1.35
 -15   3  -1    1.18    1.95
 -15   3  -1    0.16    1.68
 -15   3  -1   -0.42    2.24
  15   3   1    1.12    1.47
  15   3   1   -0.09    1.07
 -15   3  -1   -1.54    1.49
  15   3   1    2.01    1.14
  15   3   1   -0.64    1.62
  15   3   1    0.19    1.23
  15   3   1    0.68    1.74
 -15   3  -1    0.22    1.83
 -15   3  -1    2.04    2.63
 -15   3  -1    2.19    1.14
  15   3   1   -0.61    2.38
 -16  -4   1    9.66    1.51
 -16  -4   1    9.67    2.32
  16  -4  -1    7.04    1.24
 -16  -4   1    6.82    2.27
 -16  -4   1    6.82    1.79
  16  -4  -1    5.14    1.27
  16  -4  -1   12.30    2.38
  16  -4  -1   12.66    1.95
 -16  -4   1    6.63    2.16
  16  -4  -1   12.07    1.97
 -16  -4   1    7.89    1.80
 -16  -4   1    8.39    1.47
 -16  -4   1    6.35    3.00
  16  -4  -1    7.62    2.00
  16  -4  -1   10.36    2.14
 -16  -4   1    6.26    2.74
 -16   4   1    6.42    2.73
 -16   4   1    5.97    2.00
  16   4  -1    8.35    1.43
  16   4  -1   12.10    2.63
 -16   4   1   10.41    2.30
 -16   4   1    7.19    1.68
 -16   4   1    7.65    1.22
  16   4  -1    7.82    1.87
 -16   4   1    6.93    1.86
  16   4  -1    9.02    1.08
  16   4  -1    8.58    1.89
 -16   4   1   10.71    2.24
  16   4  -1    7.59    1.05
  16   4  -1    6.07    1.92
 -16   4   1    9.49    1.92
 -16   4   1    6.84    1.62
 -16   4   1    9.64    2.87
 -14  -4   1    2.06    1.02
  14  -4  -1    2.97    1.77
 -14  -4   1    3.36    1.50
 -14  -4   1    2.57    1.82
 -14  -4   1    3.75    1.61
 -14  -4   1    4.13    1.42
  14  -4  -1    2.74    0.79
  14  -4  -1    0.14    1.50
  14  -4  -1    2.26    1.48
  14  -4  -1    3.88    0.85
 -14  -4   1    1.98    1.20
  14  -4  -1    2.69    1.24
 -14  -4   1    1.66    1.58
  14  -4  -1    1.93    1.25
 -14  -4   1    1.58    1.15
  14  -4  -1    5.48    1.53
 -14  -4   1    1.04    0.92
 -14  -4   1    1.39    1.99
  14  -4  -1    4.02    1.34
  14   4  -1    2.97    1.54
 -14   4   1    0.59    1.57
 -14   4   1    2.73    1.05
 -14   4   1    1.18    1.86
 -14   4   1    1.52    1.05
  14   4  -1    0.45    1.31
  14   4  -1    2.75    1.06
 -14   4   1    2.21    0.86
  14   4  -1    3.04    1.34
 -14   4   1    3.80    1.57
 -14   4   1    3.21    1.40
  14   4  -1    3.16    1.72
 -14   4   1    2.18    1.38
  14   4  -1    2.62    0.93
  14   4  -1    3.61    1.31
 -14   4   1    2.48    1.52
  14   4  -1    2.41    1.59
  14   4  -1    2.63    0.67
 -14   4   1    3.59    1.25
  14   4  -1    2.26    0.68
 -14   4   1    1.94    1.49
 -12  -4   1    1.60    0.75
 -12  -4   1    2.39    0.97
 -12  -4   1    2.29    1.07
 -12  -4   1    3.69    1.00
  12  -4  -1    3.44    1.06
  12  -4  -1    2.93    1.02
 -12  -4   1    1.54    1.13
  12  -4  -1    1.50    0.98
 -12  -4   1    2.59    0.81
 -12  -4   1    2.88    1.45
 -12  -4   1    1.79    1.25
  12  -4  -1    1.68    0.96
  12  -4  -1    1.50    1.13
  12  -4  -1    1.77    0.61
  12  -4  -1    0.35    1.20
  12  -4  -1    0.85    1.05
 -12  -4   1    2.35    1.09
 -12  -4   1    1.48    1.29
  12  -4  -1    2.68    0.73
  12   4  -1    1.70    1.10
 -12   4   1    0.58    1.12
 -12   4   1    1.75    0.78
 -12   4   1    1.21    1.33
  12   4  -1    3.01    1.24
  12   4  -1    2.09    0.96
  12   4  -1    2.48    0.54
 -12   4   1    2.83    0.72
 -12   4   1    1.99    0.98
  12   4  -1    1.70    0.96
 -12   4   1    1.89    0.97
 -12   4   1    2.12    0.90
  12   4  -1    2.04    1.12
 -12   4   1    1.74    0.73
  12   4  -1    2.45    1.05
 -12   4   1    2.07    0.99
 -12   4   1    1.96    1.02
  12   4  -1    1.09    0.52
  12   4  -1    2.10    0.71
  12   4  -1    0.37    0.94
 -10  -4   1   -0.31    0.86
  10  -4  -1   -0.20    0.80
  10  -4  -1   -0.01    0.41
 -10  -4   1    0.44    0.61
 -10  -4   1   -0.48    0.59
 -10  -4   1   -0.21    0.55
 -10  -4   1    0.20    0.71
 -10  -4   1    0.60    0.63
 -10  -4   1    0.12    0.72
  10  -4  -1    1.03    0.72
  10  -4  -1   -0.18    0.67
 -10  -4   1   -0.21    1.00
  10  -4  -1   -1.08    0.82
 -10  -4   1   -0.24    0.88
  10  -4  -1   -0.19    0.45
  10  -4  -1   -0.63    0.77
  10  -4  -1    0.09    0.66
  10  -4  -1    0.44    0.76
  10   4  -1   -0.23    0.54
  10   4  -1    0.16    0.37
  10   4  -1   -0.45    0.66
 -10   4   1   -0.70    0.51
  10   4  -1   -0.49    0.70
 -10   4   1   -0.77    0.69
 -10   4   1   -0.68    0.97
 -10   4   1   -0.74    0.91
 -10   4   1    0.23    0.79
  10   4  -1    0.62    0.77
  10   4  -1   -0.24    0.41
 -10   4   1    0.13    0.65
 -10   4   1    0.53    0.53
 -10   4   1    0.04    0.71
  10   4  -1    0.81    0.85
 -10   4   1    0.24    0.52
  10   4  -1    0.48    0.53
  10   4  -1   -0.91    0.66
 -10   4   1   -0.56    0.78
  10   4  -1   -0.54    0.62
 -10   4   1    0.00    0.62
   8  -4  -1   60.18    5.13
   8  -4  -1   58.23    5.06
  -8  -4   1   58.66    5.14
   8  -4  -1   53.75    5.13
   8  -4  -1   61.90    5.16
  -8  -4   1   56.04    5.15
   8  -4  -1   69.72    5.15
   8  -4  -1   55.17    5.11
   8  -4  -1   61.72    5.12
   8  -4  -1   63.82    5.07
  -8  -4   1   61.21    5.10
  -8  -4   1   64.24    5.14
  -8  -4   1   61.90    5.14
   8  -4  -1   61.07    5.11
  -8  -4   1   56.72    5.10
  -8  -4   1   57.78    5.09
  -8  -4   1   59.31    5.13
   8   4  -1   60.07    5.11
   8   4  -1   63.37    5.14
  -8   4   1   64.59    5.32
   8   4  -1   59.72    5.08
  -8   4   1   59.13    5.13
   8   4  -1   67.50    5.12
  -8   4   1   55.31    5.10
   8   4  -1   58.53    5.11
   8   4  -1   57.87    5.05
   8   4  -1   61.95    5.13
  -8   4   1   63.30    5.14
  -8   4   1   61.04    5.12
  -8   4   1   57.13    5.09
  -8   4   1   59.66    5.13
  -8   4   1   59.65    5.08
  -8   4   1   67.39    5.16
  -8   4   1   60.92    5.08
   8   4  -1   58.17    5.13
   8   4  -1   59.54    5.08
   6  -4  -1   32.70    2.81
  -6  -4   1   34.08    2.79
   6  -4  -1   33.35    2.82
   6  -4  -1   32.26    2.76
  -6  -4   1   31.48    2.80
   6  -4  -1   33.65    2.77
  -6  -4   1   33.59    2.85
  -6  -4   1   32.86    2.80
  -6  -4   1   27.34    2.81
  -6  -4   1   32.56    2.84
   6  -4  -1   32.75    2.83
   6  -4  -1   34.06    2.84
   6  -4  -1   32.59    2.80
   6  -4  -1   36.29    2.82
  -6  -4   1   32.98    2.80
  -6  -4   1   37.41    2.79
   6  -4  -1   33.54    2.83
  -6  -4   1   30.86    2.77
  -6  -4   1   33.31    2.83
   6  -4  -1   34.30    2.81
  -6   4   1   31.39    2.78
  -6   4   1   31.07    2.84
   6   4  -1   29.13    2.82
   6   4  -1   31.05    2.82
  -6   4   1   30.42    2.79
   6   4  -1   35.75    2.83
  -6   4   1   32.38    2.82
   6   4  -1   33.25    2.82
  -6   4   1   33.41    2.82
   6   4  -1   33.66    2.83
   6   4  -1   31.22    2.77
   6   4  -1   32.69    2.81
  -6   4   1   32.96    2.81
   6   4  -1   31.34    2.78
   6   4  -1   31.05    2.75
  -6   4   1   34.68    2.78
  -6   4   1   31.98    2.77
   6   4  -1   33.73    2.81
  -6   4   1   33.85    2.82
   4  -4  -1  374.18   29.86
   4  -4  -1  343.32   29.86
  -4  -4   1  362.45   29.85
  -4  -4   1  351.19   29.86
   4  -4  -1  372.42   29.85
   4  -4  -1  346.37   29.87
   4  -4  -1  354.11   29.86
  -4  -4   1  370.00   29.87
   4  -4  -1  351.96   29.86
  -4  -4   1  366.24   29.84
  -4  -4   1  366.97   29.85
  -4  -4   1  377.07   29.85
  -4  -4   1  345.29   29.84
  -4  -4   1  350.03   29.85
   4  -4  -1  360.80   29.83
  -4  -4   1  359.70   29.87
   4  -4  -1  357.99   29.86
  -4  -4   1  352.76   29.86
   4  -4  -1  358.72   29.87
   4  -4  -1  360.63   29.85
   4   4  -1  366.39   29.85
  -4   4   1  354.86   29.84
  -4   4   1  364.89   29.87
  -4   4   1  362.02   29.86
   4   4  -1  344.78   29.83
   4   4  -1  357.83   29.86
  -4   4   1  353.62   29.86
   4   4  -1  354.28   29.85
   4   4  -1  379.63   29.87
  -4   4   1  346.51   29.85
  -4   4   1  346.03   29.86
   4   4  -1  365.29   29.86
   4   4  -1  359.93   29.85
  -4   4   1  360.95   29.86
  -4   4   1  356.84   29.86
  -4   4   1  361.83   29.85
   4   4  -1  369.04   29.86
   4   4  -1  366.60   29.84
   2  -4  -1   12.56    1.14
   2  -4  -1   12.46    1.17
   2  -4  -1   12.81    1.15
  -2  -4   1   12.48    1.15
  -2  -4   1   12.15    1.16
   2  -4  -1   12.10    1.16
  -2  -4   1   12.96    1.15
   2  -4  -1   13.94    1.15
  -2  -4   1   13.54    1.11
   2  -4  -1   12.39    1.16
  -2  -4   1   12.70    1.14
  -2  -4   1   13.32    1.15
   2  -4  -1   13.25    1.17
  -2  -4   1   14.32    1.17
   2  -4  -1   12.32    1.16
   2  -4  -1   12.76    1.14
  -2  -4   1   13.14    1.12
   2  -4  -1   12.24    1.11
  -2  -4   1   12.65    1.15
  -2  -4   1   13.39    1.17
  -2   4   1   12.38    1.14
  -2   4   1   13.04    1.15
   2   4  -1   13.50    1.16
   2   4  -1   11.23    1.14
   2   4  -1   12.70    1.16
  -2   4   1   13.02    1.16
  -2   4   1   13.45    1.16
  -2   4   1   13.14    1.13
   2   4  -1   12.41    1.14
  -2   4   1   13.77    1.12
  -2   4   1   13.48    1.16
   2   4  -1   13.35    1.15
   2   4  -1   13.29    1.17
  -2   4   1   13.25    1.15
   2   4  -1   12.24    1.15
  -2   4   1   13.25    1.15
   2   4  -1   14.02    1.12
   2   4  -1   13.00    1.10
  -2   4   1   12.35    1.17
   0  -4   1   73.93    6.59
   0  -4   1   78.96    6.60
   0  -4   1   80.18    6.59
   0  -4  -1   79.31    6.60
   0  -4   1   76.96    6.59
   0  -4   1   80.16    6.59
   0  -4   1   79.00    6.59
   0  -4   1   77.76    6.57
   0  -4   1   80.32    6.59
   0  -4  -1   80.16    6.60
   0  -4  -1   80.76    6.60
   0  -4  -1   75.48    6.59
   0  -4  -1   80.92    6.58
   0  -4  -1   80.97    6.60
   0  -4  -1   80.81    6.60
   0  -4  -1   77.29    6.58
   0  -4   1   78.48    6.59
   0  -4   1   79.80    6.60
   0  -4  -1   78.07    6.59
   0   4  -1   79.56    6.60
   0   4  -1   84.21    6.60
   0   4  -1   75.45    6.60
   0   4   1   78.05    6.60
   0   4   1   81.30    6.60
   0   4  -1   81.42    6.59
   0   4  -1   79.63    6.59
   0   4   1   81.60    6.61
   0   4   1   80.12    6.59
   0   4  -1   77.85    6.56
   0   4  -1   75.41    6.60
   0   4  -1   76.63    6.59
   0   4   1   80.51    6.59
   0   4  -1   83.64    6.59
   0   4   1   78.24    6.58
   0   4   1   77.01    6.58
   0   4   1   80.92    6.60
   0   4   1   78.76    6.60
   0   4  -1   79.49    6.59
   0   4   1   73.86    6.59
   2  -4   1   12.83    1.05
  -2  -4  -1   10.87    1.06
  -2  -4  -1   12.81    1.05
   2  -4   1   11.61    1.03
  -2  -4  -1   12.87    1.07
   2  -4   1   11.72    1.05
  -2  -4  -1   11.01    1.02
   2  -4   1   13.15    1.07
   2  -4   1   11.81    1.02
   2  -4   1   11.64    1.05
  -2  -4  -1   13.49    1.08
  -2  -4  -1   11.98    1.04
  -2  -4  -1   12.25    1.06
   2  -4   1   13.95    1.08
  -2  -4  -1   10.97    1.09
  -2  -4  -1   10.72    1.08
  -2  -4  -1   12.96    1.08
   2  -4   1   12.40    1.05
   2  -4   1   10.72    1.07
   2   4   1    9.45    1.06
   2   4   1    9.70    1.07
  -2   4  -1   11.89    1.07
   2   4   1   11.37    1.08
   2   4   1   10.51    1.08
   2   4   1   12.33    1.05
   2   4   1   10.26    1.05
   2   4   1   12.88    1.04
   2   4   1   11.96    1.04
  -2   4  -1   11.78    1.01
  -2   4  -1   10.92    1.07
  -2   4  -1   11.14    1.06
  -2   4  -1   12.48    1.05
   2   4   1   11.53    1.04
  -2   4  -1   12.01    1.05
  -2   4  -1   12.30    1.02
  -2   4  -1   12.03    1.05
  -2   4  -1   12.21    1.07
   4  -4   1  241.20   19.99
   4  -4   1  239.53   19.98
  -4  -4  -1  240.51   19.97
   4  -4   1  242.53   19.98
  -4  -4  -1  235.29   19.97
  -4  -4  -1  241.41   19.99
   4  -4   1  236.77   19.98
  -4  -4  -1  249.02   19.98
  -4  -4  -1  240.48   19.99
  -4  -4  -1  245.38   19.99
   4  -4   1  252.06   19.98
   4  -4   1  227.46   19.97
   4  -4   1  246.60   19.98
  -4  -4  -1  234.43   19.96
   4  -4   1  237.55   19.97
  -4  -4  -1  238.82   19.99
  -4  -4  -1  232.94   19.98
   4  -4   1  239.84   19.96
   4  -4   1  246.70   19.97
  -4  -4  -1  232.54   19.96
  -4   4  -1  236.96   19.97
   4   4   1  240.51   19.98
   4   4   1  249.80   19.97
   4   4   1  230.22   19.97
  -4   4  -1  243.40   19.99
  -4   4  -1  229.31   19.97
   4   4   1  237.79   19.97
   4   4   1  228.95   19.98
  -4   4  -1  234.57   19.98
  -4   4  -1  241.95   19.98
   4   4   1  250.40   19.98
   4   4   1  251.06   19.99
   4   4   1  229.02   19.96
  -4   4  -1  251.06   19.97
  -4   4  -1  246.09   19.98
   4   4   1  246.68   19.98
  -4   4  -1  238.19   19.95
  -6  -4  -1    0.71    0.31
   6  -4   1    0.23    0.43
  -6  -4  -1    0.15    0.54
  -6  -4  -1    1.57    0.47
   6  -4   1    0.18    0.39
   6  -4   1    0.79    0.47
   6  -4   1    0.27    0.33
   6  -4   1    1.59    0.42
  -6  -4  -1    0.77    0.49
   6  -4   1    0.60    0.45
  -6  -4  -1    0.41    0.34
  -6  -4  -1    0.75    0.51
   6  -4   1    0.25    0.36
   6  -4   1    1.02    0.40
  -6  -4  -1   -0.05    0.44
  -6  -4  -1    1.05    0.37
   6  -4   1    0.84    0.39
  -6  -4  -1    0.71    0.52
  -6   4  -1    1.20    0.53
  -6   4  -1    0.50    0.25
   6   4   1    1.45    0.40
  -6   4  -1    1.19    0.44
  -6   4  -1    0.74    0.34
  -6   4  -1    0.31    0.38
   6   4   1    0.46    0.41
   6   4   1    0.23    0.36
  -6   4  -1    0.78    0.48
  -6   4  -1    0.79    0.41
  -6   4  -1    0.93    0.36
   6   4   1    0.71    0.52
   6   4   1    0.69    0.46
   6   4   1    1.00    0.39
   6   4   1    0.13    0.39
   6   4   1    0.51    0.35
   6   4   1    0.12    0.55
  -6   4  -1    0.21    0.41
   6   4   1    0.91    0.47
   8  -4   1   -0.35    0.45
  -8  -4  -1   -0.07    0.59
   8  -4   1    0.62    0.70
  -8  -4  -1   -0.27    0.35
  -8  -4  -1    0.22    0.69
   8  -4   1    0.02    0.62
   8  -4   1    0.65    0.60
  -8  -4  -1    0.26    0.80
   8  -4   1   -0.27    0.52
   8  -4   1    1.26    0.52
  -8  -4  -1   -0.30    0.44
  -8  -4  -1    0.10    0.58
   8  -4   1   -0.05    0.46
  -8  -4  -1   -0.56    0.63
   8  -4   1    0.26    0.54
  -8  -4  -1    0.11    0.56
  -8  -4  -1    0.09    0.46
   8  -4   1   -0.16    0.67
  -8   4  -1   -0.53    0.55
   8   4   1    0.12    0.73
  -8   4  -1   -0.02    0.65
  -8   4  -1   -0.33    0.50
  -8   4  -1   -0.14    0.50
   8   4   1   -0.50    0.49
   8   4   1    0.12    0.49
   8   4   1    0.29    0.57
  -8   4  -1   -0.12    0.67
  -8   4  -1    1.07    0.60
  -8   4  -1   -0.13    0.38
   8   4   1   -0.35    0.49
   8   4   1    0.11    0.48
  -8   4  -1    0.03    0.42
   8   4   1   -0.06    0.54
  -8   4  -1    0.43    0.76
   8   4   1    0.13    0.56
   8   4   1    0.71    0.43
   8   4   1   -0.56    0.56
  -8   4  -1    0.10    0.29
  -8   4  -1   -0.18    0.73
  10  -4   1   16.60    1.92
  10  -4   1   17.76    1.84
 -10  -4  -1   18.45    2.15
 -10  -4  -1   21.81    2.05
  10  -4   1   18.83    2.04
  10  -4   1   17.50    1.79
  10  -4   1   19.19    1.96
 -10  -4  -1   17.53    1.76
 -10  -4  -1   16.89    1.89
 -10  -4  -1   18.61    2.02
  10  -4   1   19.68    1.89
 -10  -4  -1   18.25    1.92
 -10  -4  -1   24.73    2.20
 -10  -4  -1   20.83    1.75
 -10  -4  -1   16.64    1.86
  10  -4   1   20.30    1.83
 -10  -4  -1   21.15    1.95
  10  -4   1   19.33    1.83
 -10   4  -1   19.53    1.79
 -10   4  -1   20.30    1.77
  10   4   1   15.08    1.93
 -10   4  -1   19.87    1.99
 -10   4  -1   19.31    1.82
  10   4   1   23.09    2.11
 -10   4  -1   17.36    1.68
  10   4   1   21.05    1.87
 -10   4  -1   19.33    1.91
 -10   4  -1   17.20    1.90
 -10   4  -1   21.72    1.90
  10   4   1   23.89    2.49
  10   4   1   16.84    1.78
  10   4   1   17.95    1.89
  10   4   1   20.74    1.98
 -10   4  -1   17.08    1.99
  10   4   1   19.22    1.85
 -10   4  -1   16.44    2.01
 -10   4  -1   18.23    2.08
  10   4   1   20.70    1.92
 -12  -4  -1   27.51    2.84
 -12  -4  -1   27.48    2.99
 -12  -4  -1   31.13    2.90
 -12  -4  -1   29.94    2.70
  12  -4   1   28.97    2.89
 -12  -4  -1   24.36    3.00
 -12  -4  -1   32.66    2.81
 -12  -4  -1   32.28    3.13
  12  -4   1   30.79    2.95
  12  -4   1   30.89    2.88
  12  -4   1   24.97    2.76
  12  -4   1   31.87    2.71
  12  -4   1   24.65    2.78
  12  -4   1   30.81    2.77
  12  -4   1   25.87    3.10
 -12  -4  -1   27.18    2.61
 -12  -4  -1   32.48    3.25
  12  -4   1   33.07    2.88
  12   4   1   26.86    2.83
 -12   4  -1   32.73    3.19
  12   4   1   31.53    2.93
 -12   4  -1   29.92    2.97
 -12   4  -1   29.38    3.14
  12   4   1   37.74    3.16
 -12   4  -1   31.16    2.99
 -12   4  -1   34.27    3.16
  12   4   1   33.00    2.71
 -12   4  -1   27.99    2.72
 -12   4  -1   30.32    2.76
 -12   4  -1   27.00    2.68
 -12   4  -1   30.90    2.69
  12   4   1   30.02    2.72
  12   4   1   27.38    2.85
  12   4   1   24.39    2.95
 -12   4  -1   30.19    2.56
 -12   4  -1   29.16    2.85
  12   4   1   26.18    2.81
  12   4   1   31.68    2.90
 -14  -4  -1    2.97    0.99
  14  -4   1    1.47    1.67
  14  -4   1    1.81    1.45
  14  -4   1    3.53    1.70
 -14  -4  -1    1.89    1.51
 -14  -4  -1    3.02    2.28
 -14  -4  -1    0.93    0.84
  14  -4   1    2.23    0.94
 -14  -4  -1    2.46    1.34
 -14  -4  -1    1.37    1.73
 -14  -4  -1    1.82    1.31
  14  -4   1    1.66    1.97
  14  -4   1    0.08    1.16
  14  -4   1    1.04    1.33
 -14  -4  -1    2.40    1.43
 -14  -4  -1    0.70    2.19
 -14   4  -1    2.04    1.36
  14   4   1    1.84    1.13
  14   4   1    1.31    1.84
 -14   4  -1    1.76    1.92
 -14   4  -1    1.52    1.64
  14   4   1    0.60    1.47
  14   4   1    1.15    0.99
 -14   4  -1    1.60    0.64
  14   4   1    0.68    1.65
 -14   4  -1    3.80    1.81
  14   4   1    0.22    1.40
  14   4   1    0.47    0.95
  14   4   1   -1.43    2.05
 -14   4  -1    1.83    1.06
 -14   4  -1    1.80    1.27
  14   4   1    1.43    1.51
  14   4   1    1.41    1.29
 -14   4  -1    1.44    1.37
 -14   4  -1    1.34    1.04
 -14   4  -1    2.42    2.16
 -16  -4  -1   -1.61    3.26
  16  -4   1    0.43    2.49
 -16  -4  -1   -0.35    2.31
 -16  -4  -1   -0.93    2.79
  16  -4   1    1.02    1.87
 -16  -4  -1    2.08    2.06
 -16  -4  -1    0.43    1.90
  16  -4   1    0.26    1.22
 -16  -4  -1   -0.51    1.03
 -16  -4  -1    0.31    2.09
  16  -4   1   -1.11    1.70
 -16  -4  -1    2.96    3.26
 -16  -4  -1   -0.62    1.31
  16  -4   1    0.46    1.89
  16   4   1    0.15    1.72
 -16   4  -1   -0.88    1.84
  16   4   1    0.09    1.31
  16   4   1   -1.06    1.89
  16   4   1   -0.94    1.46
  16   4   1    0.59    1.33
  16   4   1    0.79    2.11
 -16   4  -1    1.48    3.24
 -16   4  -1    0.13    2.22
 -16   4  -1   -0.33    1.43
 -16   4  -1    1.35    3.24
 -16   4  -1   -0.47    1.96
 -16   4  -1   -0.71    1.17
  16   4   1   -2.21    3.07
 -15  -5   1    0.18    1.60
 -15  -5   1    0.87    1.12
 -15  -5   1    1.08    1.54
 -15  -5   1    1.22    1.10
  15  -5  -1    0.40    1.81
 -15  -5   1   -0.88    2.28
  15  -5  -1   -1.25    1.87
  15  -5  -1    1.42    1.08
 -15  -5   1   -0.09    2.59
 -15  -5   1    0.78    1.69
  15  -5  -1   -0.21    0.90
 -15  -5   1    0.46    1.81
  15  -5  -1    1.73    1.62
  15  -5  -1    0.47    1.57
 -15  -5   1    0.05    2.05
  15  -5  -1    0.45    1.49
  15  -5  -1   -0.21    1.51
 -15   5   1    1.68    2.37
  15   5  -1   -0.09    1.50
 -15   5   1    0.46    1.55
 -15   5   1    1.23    1.38
  15   5  -1   -0.17    1.53
  15   5  -1    1.53    1.98
  15   5  -1    0.65    0.69
 -15   5   1    0.50    1.58
 -15   5   1   -0.05    1.46
  15   5  -1    0.01    1.55
 -15   5   1    0.12    1.24
 -15   5   1   -0.23    0.94
 -15   5   1    0.52    1.74
  15   5  -1    1.57    2.19
  15   5  -1    0.04    1.07
  15   5  -1   -1.12    1.51
 -15   5   1    0.68    1.21
  15   5  -1    0.40    2.12
 -15   5   1    0.41    2.35
  15   5  -1    0.37    0.70
  13  -5  -1   -0.32    1.35
  13  -5  -1   -0.77    2.14
  13  -5  -1   -0.34    1.01
  13  -5  -1   -0.56    1.12
 -13  -5   1   -0.24    0.92
  13  -5  -1    0.63    0.75
  13  -5  -1    0.68    1.38
 -13  -5   1    0.51    1.31
  13  -5  -1    0.03    1.10
 -13  -5   1    0.57    1.57
  13  -5  -1   -0.08    0.65
 -13  -5   1   -1.08    0.84
 -13  -5   1    1.34    1.00
  13  -5  -1   -0.26    1.30
 -13  -5   1   -0.84    1.24
 -13  -5   1    0.74    1.04
 -13  -5   1    0.63    1.70
 -13   5   1    0.92    1.63
  13   5  -1    0.19    1.11
 -13   5   1   -0.41    1.61
  13   5  -1    0.18    1.29
 -13   5   1   -0.28    1.31
 -13   5   1    0.26    1.11
  13   5  -1   -0.87    1.10
  13   5  -1    0.48    0.60
 -13   5   1    1.37    1.13
  13   5  -1    0.07    0.54
  13   5  -1    0.20    0.79
 -13   5   1    0.70    0.78
  13   5  -1    0.17    1.37
  13   5  -1   -0.25    1.48
 -13   5   1   -0.26    0.84
 -13   5   1    0.48    0.87
 -13   5   1    0.32    1.22
  13   5  -1    0.36    1.17
  13   5  -1   -0.33    1.15
  11  -5  -1    8.05    0.80
 -11  -5   1    6.77    1.31
  11  -5  -1    6.44    1.13
 -11  -5   1    6.34    1.17
  11  -5  -1    6.79    1.11
  11  -5  -1    6.46    1.04
  11  -5  -1    5.17    1.06
 -11  -5   1    8.98    1.15
  11  -5  -1    8.88    1.22
 -11  -5   1    5.36    1.02
 -11  -5   1    6.73    1.26
  11  -5  -1    6.19    1.13
 -11  -5   1    4.96    0.94
  11  -5  -1    4.84    0.82
 -11  -5   1    4.64    0.98
 -11  -5   1    7.11    1.45
 -11  -5   1    5.99    0.92
 -11   5   1    8.63    1.67
  11   5  -1    7.11    0.73
  11   5  -1    8.53    1.06
  11   5  -1    4.59    1.08
 -11   5   1    4.18    1.19
  11   5  -1    5.24    1.16
  11   5  -1    6.56    1.08
 -11   5   1    6.86    0.91
  11   5  -1    6.57    1.16
 -11   5   1    7.31    1.12
  11   5  -1    7.38    0.91
 -11   5   1    6.11    0.95
  11   5  -1    4.96    1.08
  11   5  -1    5.59    1.25
 -11   5   1    5.74    1.10
 -11   5   1    5.76    1.23
 -11   5   1    6.47    1.34
  11   5  -1    6.73    0.80
 -11   5   1    6.82    1.04
 -11   5   1    7.03    1.19
  -9  -5   1   10.04    1.26
  -9  -5   1    7.06    1.03
   9  -5  -1   11.41    1.19
   9  -5  -1    8.84    1.14
  -9  -5   1    6.52    1.06
  -9  -5   1    7.17    1.10
   9  -5  -1   10.09    1.02
  -9  -5   1    9.35    1.06
  -9  -5   1   10.82    1.14
   9  -5  -1   11.04    1.14
  -9  -5   1    9.30    1.20
   9  -5  -1    9.37    1.15
   9  -5  -1    7.11    1.12
   9  -5  -1   10.59    1.17
  -9  -5   1   10.11    1.10
   9  -5  -1    8.06    0.96
  -9  -5   1   10.50    1.18
   9  -5  -1   10.13    1.16
  -9   5   1    8.31    1.24
  -9   5   1   10.34    1.07
   9   5  -1    9.92    1.14
   9   5  -1    9.67    1.10
   9   5  -1   11.64    1.17
   9   5  -1   13.55    1.15
  -9   5   1    9.74    1.03
   9   5  -1   11.53    1.28
  -9   5   1    9.56    1.16
  -9   5   1    9.54    1.13
  -9   5   1    9.74    1.05
   9   5  -1    9.98    1.06
   9   5  -1    9.87    1.12
  -9   5   1    7.60    1.06
  -9   5   1   10.60    1.18
  -9   5   1    9.86    1.14
   9   5  -1    9.54    0.92
  -9   5   1    9.75    1.11
   7  -5  -1  108.44    9.56
  -7  -5   1  111.20    9.55
   7  -5  -1  117.36    9.57
  -7  -5   1  109.08    9.55
   7  -5  -1  121.68    9.53
  -7  -5   1  120.62    9.57
  -7  -5   1  116.85    9.58
  -7  -5   1  108.95    9.54
  -7  -5   1  111.40    9.53
   7  -5  -1  117.51    9.58
   7  -5  -1  112.13    9.56
  -7  -5   1  118.12    9.58
  -7  -5   1  117.53    9.55
   7  -5  -1  116.05    9.52
   7  -5  -1  115.06    9.56
   7  -5  -1  111.31    9.58
   7  -5  -1  112.98    9.59
  -7  -5   1  114.62    9.56
   7  -5  -1  112.70    9.56
  -7  -5   1  120.99    9.59
   7   5  -1  111.65    9.56
   7   5  -1  113.77    9.57
   7   5  -1  112.92    9.55
   7   5  -1  113.53    9.57
  -7   5   1  117.82    9.55
  -7   5   1  110.46    9.55
   7   5  -1  116.55    9.54
   7   5  -1  120.63    9.58
   7   5  -1  119.60    9.56
  -7   5   1  107.86    9.56
   7   5  -1  106.80    9.51
  -7   5   1  114.09    9.59
  -7   5   1  119.88    9.57
   7   5  -1  111.56    9.57
  -7   5   1  116.77    9.57
  -7   5   1  110.22    9.54
  -7   5   1  112.90    9.57
   7   5  -1  111.58    9.53
   5  -5  -1   69.22    5.69
   5  -5  -1   68.73    5.69
  -5  -5   1   68.85    5.69
  -5  -5   1   61.04    5.66
  -5  -5   1   66.82    5.69
  -5  -5   1   66.44    5.71
   5  -5  -1   61.04    5.70
   5  -5  -1   63.49    5.69
  -5  -5   1   74.78    5.71
  -5  -5   1   70.53    5.68
  -5  -5   1   66.18    5.67
  -5  -5   1   75.23    5.69
  -5  -5   1   71.42    5.71
   5  -5  -1   71.68    5.70
   5  -5  -1   64.11    5.65
   5  -5  -1   71.33    5.71
   5  -5  -1   69.21    5.71
   5  -5  -1   69.03    5.68
   5  -5  -1   69.21    5.67
  -5  -5   1   71.63    5.69
  -5   5   1   69.96    5.69
   5   5  -1   62.74    5.68
   5   5  -1   66.63    5.66
  -5   5   1   64.75    5.69
  -5   5   1   67.58    5.71
  -5   5   1   67.86    5.70
   5   5  -1   69.46    5.68
   5   5  -1   65.51    5.68
  -5   5   1   64.21    5.67
   5   5  -1   66.36    5.70
   5   5  -1   69.96    5.70
   5   5  -1   65.48    5.65
  -5   5   1   66.33    5.69
   5   5  -1   64.53    5.69
  -5   5   1   68.30    5.67
  -5   5   1   73.02    5.70
   5   5  -1   69.83    5.69
  -5   5   1   62.96    5.68
  -3  -5   1  537.22   45.04
   3  -5  -1  527.63   45.04
  -3  -5   1  547.15   45.03
  -3  -5   1  537.09   45.04
  -3  -5   1  540.84   45.03
  -3  -5   1  532.52   45.03
   3  -5  -1  537.26   45.03
  -3  -5   1  545.12   45.02
   3  -5  -1  531.24   45.05
   3  -5  -1  537.06   45.04
   3  -5  -1  548.08   45.03
   3  -5  -1  540.34   45.04
  -3  -5   1  525.08   45.03
  -3  -5   1  537.06   45.02
   3  -5  -1  552.46   45.04
   3  -5  -1  543.40   45.03
  -3  -5   1  549.37   45.03
   3  -5  -1  548.60   45.01
  -3  -5   1  551.27   45.04
   3  -5  -1  554.18   45.04
  -3   5   1  536.21   45.03
   3   5  -1  555.71   45.04
  -3   5   1  554.17   45.04
   3   5  -1  557.75   45.03
  -3   5   1  509.26   45.03
  -3   5   1  560.45   45.04
   3   5  -1  550.53   45.03
   3   5  -1  533.62   45.04
  -3   5   1  542.06   45.04
  -3   5   1  555.48   45.04
   3   5  -1  524.75   45.02
   3   5  -1  553.41   45.01
   3   5  -1  539.38   45.03
  -3   5   1  550.01   45.04
  -3   5   1  541.68   45.03
   3   5  -1  542.16   45.03
   3   5  -1  543.93   45.04
  -3   5   1  533.11   45.03
  -1  -5   1   27.45    2.41
   1  -5  -1   28.96    2.41
  -1  -5   1   28.11    2.41
   1  -5  -1   27.42    2.40
  -1  -5   1   30.30    2.40
   1  -5  -1   27.71    2.41
   1  -5  -1   28.64    2.40
   1  -5  -1   27.79    2.36
  -1  -5   1   28.81    2.38
  -1  -5   1   28.26    2.39
   1  -5  -1   26.57    2.41
  -1  -5   1   27.71    2.39
  -1  -5   1   28.82    2.40
   1  -5  -1   27.28    2.38
   1  -5  -1   27.66    2.40
  -1  -5   1   28.41    2.40
   1  -5  -1   28.70    2.40
  -1  -5   1   29.83    2.41
  -1   5   1   28.94    2.39
  -1   5   1   29.70    2.40
   1   5  -1   25.10    2.40
   1   5  -1   29.09    2.40
  -1   5   1   27.01    2.39
  -1   5   1   26.62    2.40
  -1   5   1   27.77    2.37
   1   5  -1   28.65    2.39
   1   5  -1   28.08    2.39
   1   5  -1   30.78    2.40
   1   5  -1   29.21    2.41
   1   5  -1   30.68    2.40
   1   5  -1   28.63    2.39
  -1   5   1   29.05    2.40
   1   5  -1   25.42    2.37
  -1   5   1   27.09    2.41
  -1   5   1   27.76    2.39
  -1   5   1   27.29    2.38
   1   5  -1   28.34    2.35
  -1   5   1   27.09    2.39
  -1  -5  -1   80.18    6.51
  -1  -5  -1   77.82    6.50
   1  -5   1   76.00    6.50
  -1  -5  -1   73.73    6.51
  -1  -5  -1   76.95    6.48
  -1  -5  -1   78.72    6.51
   1  -5   1   78.62    6.47
   1  -5   1   74.89    6.49
  -1  -5  -1   72.34    6.50
   1  -5   1   75.75    6.50
   1  -5   1   74.21    6.49
   1  -5   1   81.63    6.49
  -1  -5  -1   75.71    6.48
   1  -5   1   75.50    6.49
  -1  -5  -1   79.09    6.50
  -1  -5  -1   78.16    6.50
   1  -5   1   81.35    6.49
   1  -5   1   79.84    6.50
   1  -5   1   78.58    6.50
  -1  -5  -1   74.50    6.51
  -1   5  -1   80.38    6.48
  -1   5  -1   77.05    6.47
   1   5   1   80.97    6.51
  -1   5  -1   76.62    6.49
   1   5   1   74.25    6.49
   1   5   1   76.52    6.50
   1   5   1   80.75    6.50
  -1   5  -1   78.54    6.49
   1   5   1   79.59    6.50
   1   5   1   79.09    6.51
   1   5   1   75.60    6.51
   1   5   1   76.10    6.48
  -1   5  -1   74.39    6.50
  -1   5  -1   78.50    6.50
  -1   5  -1   79.36    6.50
   1   5   1   77.70    6.48
   1   5   1   77.03    6.50
  -1   5  -1   81.25    6.49
  -1   5  -1   80.23    6.50
  -3  -5  -1    2.77    0.47
  -3  -5  -1    3.90    0.51
  -3  -5  -1    4.08    0.47
  -3  -5  -1    3.34    0.42
  -3  -5  -1    3.91    0.49
  -3  -5  -1    3.29    0.52
  -3  -5  -1    2.86    0.50
   3  -5   1    3.53    0.48
   3  -5   1    3.35    0.47
  -3  -5  -1    3.19    0.43
  -3  -5  -1    3.45    0.44
   3  -5   1    3.40    0.40
   3  -5   1    2.27    0.37
  -3  -5  -1    4.84    0.47
  -3  -5  -1    2.72    0.37
   3  -5   1    2.17    0.46
   3  -5   1    3.37    0.50
   3  -5   1    2.32    0.47
   3  -5   1    2.29    0.44
   3  -5   1    3.23    0.43
   3  -5   1    3.38    0.44
   3   5   1    3.20    0.54
   3   5   1    2.99    0.43
  -3   5  -1    3.47    0.47
  -3   5  -1    3.11    0.49
  -3   5  -1    2.82    0.38
   3   5   1    3.80    0.43
  -3   5  -1    3.26    0.45
  -3   5  -1    4.18    0.39
   3   5   1    3.55    0.51
   3   5   1    3.20    0.41
   3   5   1    3.32    0.45
   3   5   1    3.19    0.48
  -3   5  -1    3.41    0.47
   3   5   1    3.23    0.46
   3   5   1    3.90    0.50
  -3   5  -1    4.12    0.45
  -3   5  -1    3.14    0.50
  -3   5  -1    2.95    0.43
  -5  -5  -1    6.26    0.63
  -5  -5  -1    7.91    0.76
  -5  -5  -1    5.72    0.67
   5  -5   1    6.46    0.68
  -5  -5  -1    4.72    0.60
   5  -5   1    6.35    0.76
   5  -5   1    4.63    0.68
  -5  -5  -1    5.76    0.66
  -5  -5  -1    4.18    0.69
  -5  -5  -1    5.50    0.74
  -5  -5  -1    4.96    0.72
   5  -5   1    5.16    0.75
   5  -5   1    5.31    0.61
  -5  -5  -1    6.11    0.78
   5  -5   1    4.53    0.64
  -5  -5  -1    4.65    0.70
   5  -5   1    4.46    0.61
   5  -5   1    6.59    0.71
   5  -5   1    5.50    0.62
   5  -5   1    6.94    0.65
   5   5   1    5.63    0.72
  -5   5  -1    5.54    0.67
   5   5   1    5.36    0.69
  -5   5  -1    4.89    0.74
  -5   5  -1    4.64    0.64
   5   5   1    6.24    0.68
  -5   5  -1    4.73    0.60
  -5   5  -1    4.74    0.69
   5   5   1    6.58    0.71
   5   5   1    5.50    0.64
  -5   5  -1    5.71    0.65
   5   5   1    5.70    0.67
   5   5   1    5.87    0.64
  -5   5  -1    5.38    0.55
  -5   5  -1    4.40    0.62
   5   5   1    5.93    0.69
  -5   5  -1    6.97    0.73
   5   5   1    5.06    0.62
   7  -5   1   40.44    3.41
   7  -5   1   40.39    3.47
   7  -5   1   42.73    3.41
  -7  -5  -1   40.65    3.44
  -7  -5  -1   35.63    3.37
  -7  -5  -1   39.04    3.46
   7  -5   1   43.41    3.46
  -7  -5  -1   41.63    3.48
   7  -5   1   42.68    3.43
  -7  -5  -1   38.75    3.39
   7  -5   1   39.03    3.41
  -7  -5  -1   38.72    3.47
  -7  -5  -1   40.40    3.45
   7  -5   1   36.57    3.43
  -7  -5  -1   44.76    3.50
  -7  -5  -1   40.03    3.40
   7  -5   1   38.67    3.43
  -7   5  -1   39.93    3.40
   7   5   1   39.93    3.41
   7   5   1   40.57    3.40
  -7   5  -1   43.48    3.39
   7   5   1   38.56    3.44
  -7   5  -1   37.75    3.41
   7   5   1   35.73    3.43
   7   5   1   42.87    3.44
   7   5   1   41.32    3.40
  -7   5  -1   41.91    3.35
  -7   5  -1   37.57    3.47
  -7   5  -1   36.15    3.45
   7   5   1   35.75    3.40
   7   5   1   39.96    3.46
   7   5   1   37.85    3.41
  -7   5  -1   38.85    3.45
  -7   5  -1   39.75    3.43
   7   5   1   39.80    3.42
  -9  -5  -1    9.33    1.35
   9  -5   1   11.31    1.31
   9  -5   1   10.96    1.38
   9  -5   1   12.51    1.34
  -9  -5  -1   11.31    1.53
   9  -5   1   13.26    1.28
  -9  -5  -1   13.03    1.38
   9  -5   1   11.41    1.43
   9  -5   1   14.53    1.36
  -9  -5  -1   11.60    1.19
   9  -5   1   10.92    1.30
  -9  -5  -1   11.96    1.28
  -9  -5  -1   12.26    1.25
  -9  -5  -1   13.12    1.29
   9  -5   1    9.09    1.40
   9  -5   1   11.67    1.30
  -9  -5  -1   11.23    1.32
  -9  -5  -1   12.25    1.46
  -9   5  -1   12.38    1.37
  -9   5  -1   12.44    1.25
  -9   5  -1   10.97    1.36
  -9   5  -1   10.82    1.11
   9   5   1   13.33    1.42
   9   5   1    9.89    1.30
  -9   5  -1   12.40    1.32
  -9   5  -1   12.32    1.17
  -9   5  -1   12.13    1.27
   9   5   1   12.44    1.31
  -9   5  -1   10.86    1.47
   9   5   1   11.83    1.33
  -9   5  -1   13.43    1.35
   9   5   1   12.67    1.32
   9   5   1   11.92    1.36
   9   5   1   12.38    1.24
   9   5   1   14.92    1.45
   9   5   1   11.13    1.42
  -9   5  -1   11.14    1.43
  -9   5  -1   10.51    1.28
   9   5   1   12.11    1.36
 -11  -5  -1   35.67    3.33
 -11  -5  -1   36.08    3.66
 -11  -5  -1   37.78    3.50
  11  -5   1   39.17    3.39
 -11  -5  -1   43.44    3.38
  11  -5   1   38.29    3.46
  11  -5   1   39.62    3.65
 -11  -5  -1   41.08    3.60
 -11  -5  -1   34.26    3.74
  11  -5   1   39.41    3.51
  11  -5   1   41.94    3.53
 -11  -5  -1   38.58    3.48
  11  -5   1   38.98    3.40
  11  -5   1   34.21    3.45
 -11  -5  -1   37.36    3.42
  11  -5   1   39.23    3.50
 -11  -5  -1   32.77    3.50
 -11   5  -1   42.25    3.41
 -11   5  -1   42.43    3.66
  11   5   1   42.95    3.39
 -11   5  -1   40.19    3.63
 -11   5  -1   38.41    3.38
 -11   5  -1   32.88    3.63
 -11   5  -1   39.73    3.48
 -11   5  -1   39.42    3.27
  11   5   1   36.17    3.49
  11   5   1   37.15    3.46
  11   5   1   38.75    3.50
 -11   5  -1   36.37    3.55
  11   5   1   39.13    3.53
  11   5   1   35.38    3.38
  11   5   1   37.42    3.44
 -11   5  -1   39.82    3.50
 -11   5  -1   40.18    3.58
  11   5   1   37.67    3.45
  11   5   1   42.47    3.67
  11   5   1   34.78    3.57
 -11   5  -1   36.24    3.33
  13  -5   1    1.10    0.88
 -13  -5  -1   -1.28    1.33
  13  -5   1    0.77    1.10
 -13  -5  -1   -0.78    1.58
  13  -5   1    0.30    1.50
 -13  -5  -1    0.49    0.94
  13  -5   1    0.25    1.21
  13  -5   1   -0.74    1.31
  13  -5   1    0.49    1.73
 -13  -5  -1    0.54    1.72
 -13  -5  -1    0.22    2.04
 -13  -5  -1    0.16    1.35
  13  -5   1    1.53    1.12
  13  -5   1   -0.85    1.67
 -13  -5  -1   -0.49    1.94
 -13  -5  -1    0.32    0.76
  13  -5   1    0.04    1.35
 -13  -5  -1   -0.13    1.07
 -13  -5  -1    0.95    1.27
 -13   5  -1   -0.15    1.51
  13   5   1    1.43    1.34
 -13   5  -1    1.26    1.70
 -13   5  -1    2.21    1.90
  13   5   1   -0.38    1.12
 -13   5  -1   -0.79    1.76
  13   5   1   -0.80    1.51
 -13   5  -1    0.06    1.04
 -13   5  -1    0.38    0.95
  13   5   1   -0.36    0.90
  13   5   1   -0.97    1.40
 -13   5  -1    0.97    0.84
  13   5   1    1.07    1.05
  13   5   1    0.50    0.88
 -13   5  -1    0.19    0.53
 -13   5  -1   -0.37    1.15
  13   5   1   -0.75    1.29
 -13   5  -1    0.89    1.46
  13   5   1    1.06    1.27
  13   5   1    1.55    1.77
 -13   5  -1    1.07    1.27
 -15  -5  -1    1.75    2.88
 -15  -5  -1    3.92    1.80
  15  -5   1   -0.23    1.58
  15  -5   1   -1.20    1.18
  15  -5   1   -2.64    2.07
  15  -5   1   -0.02    2.45
 -15  -5  -1   -0.75    1.18
 -15  -5  -1   -1.12    1.75
  15  -5   1   -0.48    1.99
 -15  -5  -1    0.11    1.62
  15  -5   1   -0.66    1.70
 -15  -5  -1    0.37    0.98
 -15  -5  -1    0.13    2.02
  15  -5   1    0.95    1.63
  15   5   1    0.42    1.31
 -15   5  -1    0.30    0.71
  15   5   1    0.01    1.12
  15   5   1    0.56    2.63
 -15   5  -1    1.29    1.58
  15   5   1    0.39    1.50
  15   5   1   -3.70    2.04
 -15   5  -1    1.22    1.67
  15   5   1    0.83    2.31
 -15   5  -1    0.20    2.37
  15   5   1    0.84    1.96
  15   5   1   -1.76    1.69
 -15   5  -1   -0.05    1.51
  15   5   1   -0.84    1.18
 -15   5  -1   -2.06    2.03
 -15   5  -1    0.57    1.91
 -15   5  -1   -0.09    1.26
 -15   5  -1    4.91    2.72
 -15   5  -1   -0.17    1.09
  16  -6  -1   14.29    2.27
  16  -6  -1   10.99    2.91
 -16  -6   1    6.32    1.95
  16  -6  -1   11.84    1.75
 -16  -6   1    9.31    2.86
  16  -6  -1   10.89    2.48
 -16  -6   1   11.09    2.57
 -16  -6   1   11.14    3.97
  16  -6  -1   13.50    2.11
  16  -6  -1   13.58    2.15
 -16  -6   1   10.45    1.69
  16  -6  -1   12.06    2.67
  16  -6  -1   10.44    1.45
 -16  -6   1    9.74    1.78
 -16  -6   1    6.62    2.10
 -16  -6   1   14.82    2.21
 -16  -6   1   12.41    3.18
  16   6  -1   11.01    2.15
 -16   6   1    8.48    2.60
  16   6  -1    9.15    2.75
 -16   6   1   20.77    3.12
  16   6  -1    9.82    2.92
 -16   6   1   16.13    1.96
  16   6  -1    7.75    1.25
  16   6  -1   11.60    1.33
  16   6  -1    9.20    2.32
 -16   6   1    9.60    1.82
  16   6  -1    7.54    2.04
  16   6  -1    8.37    1.62
 -16   6   1   13.68    2.16
 -16   6   1   12.69    2.28
 -16   6   1   11.39    1.52
 -16   6   1   13.29    2.10
 -16   6   1    9.75    2.12
  14  -6  -1    9.97    1.99
 -14  -6   1    9.17    1.95
 -14  -6   1    9.34    2.13
 -14  -6   1    7.17    1.31
  14  -6  -1    8.81    1.14
  14  -6  -1    6.68    1.84
 -14  -6   1   10.87    1.98
 -14  -6   1    9.20    2.18
 -14  -6   1    7.55    1.72
 -14  -6   1    6.91    1.29
  14  -6  -1   11.70    1.69
 -14  -6   1    5.68    1.54
  14  -6  -1    9.50    1.72
  14  -6  -1    7.28    2.03
  14  -6  -1   11.44    1.58
 -14  -6   1    6.73    1.88
 -14  -6   1   10.71    1.59
  14  -6  -1    6.46    1.27
  14   6  -1    7.05    1.37
 -14   6   1    8.35    1.21
 -14   6   1    9.21    1.76
 -14   6   1    9.06    1.64
  14   6  -1    8.61    1.62
 -14   6   1    9.15    2.19
  14   6  -1   11.18    2.08
 -14   6   1    7.80    1.61
  14   6  -1    6.51    1.04
  14   6  -1   10.42    1.53
 -14   6   1   12.68    1.98
  14   6  -1    7.59    1.64
 -14   6   1    8.40    1.36
  14   6  -1    9.99    1.90
 -14   6   1    6.13    1.63
 -14   6   1    9.24    1.77
  14   6  -1    8.39    1.58
  14   6  -1    8.29    0.96
 -14   6   1    8.55    1.86
  12  -6  -1   33.14    3.03
 -12  -6   1   32.62    2.91
  12  -6  -1   30.17    2.75
 -12  -6   1   31.78    2.88
  12  -6  -1   28.66    2.96
 -12  -6   1   33.00    3.06
  12  -6  -1   31.98    2.82
 -12  -6   1   30.43    3.07
 -12  -6   1   32.50    3.21
  12  -6  -1   33.94    3.00
  12  -6  -1   28.23    3.12
 -12  -6   1   30.06    2.97
 -12  -6   1   29.14    3.34
  12  -6  -1   28.93    2.92
  12  -6  -1   32.41    3.05
  12  -6  -1   31.02    3.08
 -12  -6   1   32.29    3.13
 -12  -6   1   30.89    2.86
 -12   6   1   31.73    3.01
 -12   6   1   31.89    2.82
 -12   6   1   28.22    3.17
  12   6  -1   31.12    2.82
 -12   6   1   31.85    2.98
 -12   6   1   26.12    2.82
  12   6  -1   31.06    2.98
 -12   6   1   35.01    3.10
  12   6  -1   32.00    2.78
  12   6  -1   34.13    3.08
  12   6  -1   29.38    2.69
  12   6  -1   31.48    3.02
  12   6  -1   26.85    3.07
  12   6  -1   29.08    2.88
 -12   6   1   28.04    2.96
 -12   6   1   31.50    3.01
  12   6  -1   32.80    3.06
 -12   6   1   33.51    3.08
 -12   6   1   32.05    3.25
 -12   6   1   33.71    2.88
  12   6  -1   32.30    3.20
  10  -6  -1   30.23    2.77
  10  -6  -1   28.64    2.58
 -10  -6   1   26.98    2.64
 -10  -6   1   28.21    2.76
 -10  -6   1   30.08    2.66
 -10  -6   1   35.86    3.06
  10  -6  -1   28.00    2.62
  10  -6  -1   36.51    2.78
  10  -6  -1   34.45    2.72
  10  -6  -1   30.92    2.77
 -10  -6   1   27.38    2.64
 -10  -6   1   30.01    2.70
 -10  -6   1   28.73    2.84
 -10  -6   1   24.08    2.81
  10  -6  -1   28.60    2.71
 -10  -6   1   24.17    2.77
  10  -6  -1   27.77    2.76
 -10   6   1   31.94    2.90
 -10   6   1   27.46    2.85
  10   6  -1   27.86    2.76
  10   6  -1   29.84    2.64
  10   6  -1   29.94    2.73
 -10   6   1   30.70    2.72
  10   6  -1   25.99    2.54
  10   6  -1   30.77    2.64
 -10   6   1   27.19    2.78
 -10   6   1   34.13    2.76
  10   6  -1   30.31    2.75
  10   6  -1   27.96    2.70
 -10   6   1   30.31    2.63
 -10   6   1   28.79    2.62
 -10   6   1   33.08    2.79
  10   6  -1   29.65    2.73
  10   6  -1   31.94    2.79
 -10   6   1   34.06    2.63
   8  -6  -1   15.05    1.40
  -8  -6   1   14.48    1.47
  -8  -6   1   15.37    1.63
   8  -6  -1   13.71    1.57
  -8  -6   1   13.37    1.62
  -8  -6   1   16.01    1.68
   8  -6  -1   14.53    1.45
   8  -6  -1   15.17    1.49
  -8  -6   1   14.13    1.65
   8  -6  -1   14.96    1.52
  -8  -6   1   15.09    1.48
  -8  -6   1   15.46    1.49
  -8  -6   1   17.87    1.59
   8  -6  -1   14.34    1.55
   8  -6  -1   16.42    1.64
   8  -6  -1   19.15    1.60
  -8  -6   1   12.35    1.47
  -8   6   1   14.84    1.62
   8   6  -1   18.65    1.47
  -8   6   1   13.91    1.54
   8   6  -1   17.08    1.59
   8   6  -1   15.89    1.37
   8   6  -1   12.61    1.60
  -8   6   1   15.34    1.44
  -8   6   1   18.17    1.67
  -8   6   1   14.53    1.54
   8   6  -1   12.45    1.52
  -8   6   1   17.87    1.52
   8   6  -1   14.67    1.43
   8   6  -1   18.47    1.64
   8   6  -1   15.99    1.57
  -8   6   1   15.50    1.44
  -8   6   1   17.20    1.57
  -8   6   1   15.59    1.55
  -6  -6   1   56.18    4.76
   6  -6  -1   55.96    4.81
   6  -6  -1   56.15    4.79
   6  -6  -1   57.36    4.79
   6  -6  -1   55.07    4.79
   6  -6  -1   57.51    4.79
   6  -6  -1   57.07    4.76
  -6  -6   1   58.65    4.83
  -6  -6   1   56.88    4.80
  -6  -6   1   57.82    4.77
  -6  -6   1   51.11    4.79
  -6  -6   1   52.68    4.77
  -6  -6   1   58.06    4.77
  -6  -6   1   52.20    4.81
   6  -6  -1   55.13    4.80
  -6  -6   1   60.47    4.78
   6  -6  -1   57.84    4.82
   6  -6  -1   59.39    4.82
  -6  -6   1   54.39    4.79
   6  -6  -1   54.93    4.73
   6   6  -1   61.62    4.79
  -6   6   1   53.15    4.78
   6   6  -1   56.94    4.73
  -6   6   1   57.62    4.79
  -6   6   1   60.96    4.80
   6   6  -1   54.77    4.80
   6   6  -1   56.55    4.81
  -6   6   1   60.80    4.80
  -6   6   1   57.29    4.80
   6   6  -1   56.81    4.78
   6   6  -1   54.54    4.77
   6   6  -1   56.84    4.74
  -6   6   1   51.70    4.78
   6   6  -1   59.55    4.79
  -6   6   1   55.31    4.76
  -6   6   1   52.46    4.76
   6   6  -1   56.10    4.78
  -6   6   1   59.37    4.81
   4  -6  -1  136.51   11.59
  -4  -6   1  139.06   11.60
   4  -6  -1  136.76   11.59
   4  -6  -1  138.22   11.58
   4  -6  -1  140.33   11.56
   4  -6  -1  144.86   11.58
   4  -6  -1  138.40   11.60
  -4  -6   1  133.09   11.59
  -4  -6   1  141.04   11.58
  -4  -6   1  144.21   11.59
  -4  -6   1  143.89   11.57
   4  -6  -1  135.68   11.59
  -4  -6   1  139.69   11.59
   4  -6  -1  138.79   11.59
   4  -6  -1  141.54   11.60
  -4  -6   1  139.05   11.57
  -4  -6   1  136.61   11.61
   4  -6  -1  138.12   11.61
  -4  -6   1  131.67   11.58
  -4  -6   1  134.68   11.60
  -4  -6   1  137.34   11.58
  -4   6   1  143.65   11.60
   4   6  -1  138.76   11.60
  -4   6   1  138.28   11.61
   4   6  -1  141.10   11.60
  -4   6   1  137.28   11.59
  -4   6   1  138.49   11.58
  -4   6   1  139.91   11.59
   4   6  -1  142.09   11.55
  -4   6   1  131.25   11.57
   4   6  -1  139.23   11.58
  -4   6   1  141.49   11.59
  -4   6   1  141.55   11.59
  -4   6   1  141.66   11.57
   4   6  -1  139.26   11.60
   4   6  -1  134.20   11.56
   4   6  -1  148.66   11.59
   4   6  -1  138.24   11.58
   4   6  -1  132.78   11.58
  -2  -6   1  189.57   16.16
  -2  -6   1  189.55   16.19
  -2  -6   1  200.05   16.18
   2  -6  -1  195.78   16.17
   2  -6  -1  188.12   16.19
   2  -6  -1  199.65   16.19
  -2  -6   1  190.26   16.15
   2  -6  -1  193.03   16.19
   2  -6  -1  186.61   16.17
  -2  -6   1  197.75   16.18
   2  -6  -1  199.90   16.15
   2  -6  -1  195.97   16.18
  -2  -6   1  198.42   16.17
  -2  -6   1  203.78   16.18
  -2  -6   1  195.27   16.18
  -2  -6   1  196.47   16.18
   2  -6  -1  197.96   16.18
   2  -6  -1  193.36   16.19
  -2  -6   1  197.94   16.17
  -2   6   1  197.33   16.18
  -2   6   1  196.84   16.18
   2   6  -1  184.53   16.18
  -2   6   1  189.84   16.15
  -2   6   1  191.74   16.17
  -2   6   1  183.82   16.17
  -2   6   1  188.88   16.18
   2   6  -1  193.04   16.17
   2   6  -1  195.69   16.18
   2   6  -1  188.39   16.17
   2   6  -1  205.99   16.18
  -2   6   1  193.04   16.17
   2   6  -1  197.21   16.18
   2   6  -1  195.15   16.14
  -2   6   1  198.54   16.17
   2   6  -1  198.45   16.16
  -2   6   1  189.23   16.19
  -2   6   1  193.81   16.18
   2   6  -1  193.06   16.17
   0  -6  -1  101.66    9.05
   0  -6   1  109.66    9.05
   0  -6   1  107.84    9.05
   0  -6  -1  105.54    9.04
   0  -6   1  110.98    9.04
   0  -6   1  110.80    9.04
   0  -6  -1  111.29    9.05
   0  -6   1  102.19    9.04
   0  -6  -1  113.29    9.05
   0  -6   1  105.45    9.05
   0  -6  -1  101.87    9.04
   0  -6   1  110.74    9.04
   0  -6   1  107.93    9.04
   0  -6  -1  108.51    9.02
   0  -6   1  111.26    9.04
   0  -6  -1  108.82    9.06
   0  -6  -1  107.77    9.06
   0   6  -1  107.71    9.05
   0   6   1  104.54    9.05
   0   6  -1  105.80    9.01
   0   6   1  105.82    9.03
   0   6  -1  105.77    9.04
   0   6  -1  108.57    9.04
   0   6   1  110.38    9.04
   0   6   1  107.55    9.04
   0   6   1  108.09    9.04
   0   6   1  105.82    9.06
   0   6   1  104.13    9.04
   0   6  -1  108.18    9.03
   0   6  -1  116.22    9.05
   0   6  -1  111.92    9.06
   0   6  -1  114.09    9.03
   0   6   1  109.58    9.05
   0   6   1  108.91    9.05
   0   6  -1  110.39    9.05
   0   6  -1  114.92    9.04
   0   6   1  105.79    9.02
   2  -6   1   13.84    1.17
  -2  -6  -1   12.11    1.12
   2  -6   1   11.57    1.17
   2  -6   1   13.22    1.14
   2  -6   1   13.81    1.16
   2  -6   1   12.49    1.20
  -2  -6  -1   12.05    1.17
   2  -6   1   12.26    1.17
  -2  -6  -1   13.32    1.21
  -2  -6  -1   13.61    1.18
   2  -6   1   11.97    1.18
  -2  -6  -1   10.20    1.18
  -2  -6  -1   11.72    1.16
  -2  -6  -1   12.74    1.21
  -2  -6  -1   14.30    1.15
   2  -6   1   12.02    1.14
  -2  -6  -1   13.99    1.20
   2  -6   1   10.83    1.10
   2  -6   1   12.92    1.17
  -2  -6  -1   10.37    1.23
  -2   6  -1   10.82    1.18
  -2   6  -1   12.49    1.14
   2   6   1   14.06    1.17
   2   6   1   14.84    1.20
   2   6   1   15.02    1.22
  -2   6  -1   12.51    1.21
   2   6   1   13.14    1.23
   2   6   1   10.86    1.14
  -2   6  -1   13.41    1.17
  -2   6  -1   12.60    1.09
  -2   6  -1   10.97    1.15
  -2   6  -1   14.02    1.12
   2   6   1   12.30    1.13
  -2   6  -1   12.20    1.18
   2   6   1   13.38    1.16
   2   6   1   12.43    1.18
   2   6   1   13.80    1.18
  -2   6  -1   12.24    1.16
  -4  -6  -1    1.78    0.39
   4  -6   1    0.97    0.44
   4  -6   1    0.59    0.52
   4  -6   1    0.77    0.33
   4  -6   1    0.35    0.38
  -4  -6  -1    0.67    0.49
   4  -6   1    1.66    0.47
   4  -6   1    0.80    0.48
   4  -6   1    0.84    0.44
  -4  -6  -1    1.04    0.54
  -4  -6  -1    1.26    0.32
  -4  -6  -1    0.47    0.47
  -4  -6  -1    0.55    0.42
   4  -6   1    1.50    0.39
   4  -6   1    0.02    0.38
  -4  -6  -1    0.80    0.58
  -4  -6  -1    2.14    0.43
  -4  -6  -1    0.51    0.48
   4  -6   1    1.60    0.33
  -4  -6  -1    1.07    0.38
  -4  -6  -1    2.17    0.54
   4   6   1    1.45    0.41
   4   6   1    1.31    0.53
   4   6   1    1.67    0.57
  -4   6  -1    1.15    0.49
  -4   6  -1    1.40    0.40
   4   6   1    0.91    0.46
   4   6   1    2.47    0.37
  -4   6  -1    2.20    0.30
  -4   6  -1    1.10    0.48
  -4   6  -1    1.23    0.28
  -4   6  -1    1.00    0.39
   4   6   1    1.14    0.40
  -4   6  -1    0.59    0.43
   4   6   1    0.45    0.43
   4   6   1    0.62    0.35
   4   6   1    1.29    0.45
  -4   6  -1    0.57    0.41
  -4   6  -1    2.66    0.52
  -6  -6  -1    2.03    0.68
  -6  -6  -1    2.02    0.72
   6  -6   1    1.69    0.49
   6  -6   1    2.33    0.61
  -6  -6  -1    2.03    0.60
  -6  -6  -1    1.98    0.52
  -6  -6  -1    0.92    0.67
   6  -6   1    3.26    0.54
  -6  -6  -1    2.22    0.50
   6  -6   1    2.77    0.59
   6  -6   1    3.06    0.63
   6  -6   1    2.48    0.58
   6  -6   1    2.47    0.57
   6  -6   1    2.95    0.55
   6  -6   1    2.21    0.45
  -6  -6  -1    3.02    0.80
   6  -6   1    2.56    0.57
  -6  -6  -1    2.41    0.52
  -6  -6  -1    1.53    0.72
   6   6   1    3.17    0.58
  -6   6  -1    3.89    0.62
   6   6   1    1.13    0.60
  -6   6  -1    1.92    0.53
   6   6   1    2.95    0.52
   6   6   1    2.53    0.52
  -6   6  -1    2.21    0.37
  -6   6  -1    2.08    0.49
  -6   6  -1    2.28    0.66
   6   6   1    4.23    0.75
  -6   6  -1    1.73    0.53
   6   6   1    2.67    0.64
   6   6   1    2.63    0.56
   6   6   1    3.51    0.61
  -6   6  -1    3.00    0.67
   6   6   1    2.44    0.56
  -6   6  -1    4.09    0.58
  -6   6  -1    3.31    0.48
   8  -6   1   14.81    1.51
   8  -6   1   14.68    1.70
  -8  -6  -1   13.08    1.68
   8  -6   1   17.75    1.56
  -8  -6  -1   16.51    1.69
  -8  -6  -1   16.45    1.74
  -8  -6  -1   13.57    1.52
   8  -6   1   14.10    1.57
   8  -6   1   16.12    1.56
   8  -6   1   12.55    1.50
   8  -6   1   16.54    1.53
  -8  -6  -1   16.38    1.64
   8  -6   1   17.38    1.54
  -8  -6  -1   14.97    1.48
  -8  -6  -1   14.28    1.70
  -8  -6  -1   18.20    1.53
  -8  -6  -1   12.83    1.62
   8  -6   1   14.99    1.62
   8   6   1   12.49    1.58
   8   6   1   17.76    1.59
   8   6   1   17.96    1.52
   8   6   1   15.98    1.58
  -8   6  -1   13.48    1.53
  -8   6  -1   14.56    1.74
   8   6   1   16.83    1.53
  -8   6  -1   13.06    1.53
   8   6   1   16.95    1.68
  -8   6  -1   17.75    1.63
   8   6   1   16.42    1.67
   8   6   1   18.55    1.79
   8   6   1   15.02    1.62
  -8   6  -1   15.34    1.52
  -8   6  -1   16.17    1.49
  -8   6  -1   15.60    1.41
  10  -6   1    0.59    0.93
 -10  -6  -1    1.71    1.33
  10  -6   1    2.84    0.80
  10  -6   1    1.77    1.08
  10  -6   1    3.32    1.14
 -10  -6  -1    0.60    1.14
 -10  -6  -1    2.53    1.10
 -10  -6  -1    1.65    0.99
 -10  -6  -1    1.27    0.77
  10  -6   1    2.74    0.67
  10  -6   1    3.68    0.89
  10  -6   1    2.51    0.82
 -10  -6  -1    1.87    0.76
  10  -6   1    2.05    0.94
  10  -6   1    2.25    1.04
 -10  -6  -1    1.24    1.22
 -10  -6  -1    1.65    1.00
 -10  -6  -1    1.56    0.70
  10   6   1    1.88    0.97
  10   6   1    6.20    1.20
 -10   6  -1    1.43    0.97
 -10   6  -1    2.13    0.90
  10   6   1    2.76    0.87
 -10   6  -1    2.13    1.20
 -10   6  -1    1.79    0.83
 -10   6  -1    1.61    0.80
 -10   6  -1    2.13    0.93
  10   6   1    1.61    0.92
  10   6   1    2.48    0.84
  10   6   1    1.94    0.94
  10   6   1    2.99    0.71
  10   6   1    3.58    0.99
  10   6   1    0.87    0.68
 -10   6  -1    1.95    0.47
 -10   6  -1    4.01    0.83
  10   6   1    2.18    0.88
 -10   6  -1    1.97    0.73
 -10   6  -1    1.41    0.54
 -12  -6  -1    9.71    1.48
  12  -6   1   14.54    1.85
 -12  -6  -1    8.17    1.69
 -12  -6  -1   10.54    1.87
 -12  -6  -1   11.39    2.05
 -12  -6  -1   11.45    1.92
 -12  -6  -1   12.81    1.55
  12  -6   1   13.53    1.64
  12  -6   1   18.10    2.15
  12  -6   1   10.94    1.39
  12  -6   1   13.81    1.73
  12  -6   1   11.83    1.57
 -12  -6  -1   12.82    1.46
  12  -6   1   12.92    1.55
  12  -6   1   15.50    1.79
 -12  -6  -1   12.84    2.04
  12  -6   1   15.07    1.95
  12   6   1   11.79    1.44
  12   6   1   12.46    1.74
  12   6   1   13.23    1.64
  12   6   1   12.87    1.66
  12   6   1   13.31    1.54
 -12   6  -1   10.72    1.60
 -12   6  -1   10.46    1.63
 -12   6  -1   11.07    2.02
  12   6   1   16.87    2.12
 -12   6  -1   13.28    1.29
 -12   6  -1   11.08    2.05
 -12   6  -1   13.42    1.38
 -12   6  -1   16.03    2.05
  12   6   1   12.15    1.67
  12   6   1   11.65    1.63
  12   6   1   14.24    1.55
 -12   6  -1   14.08    1.63
 -12   6  -1   11.97    1.78
  12   6   1   14.53    1.84
  14  -6   1    1.72    1.06
  14  -6   1    4.41    1.39
 -14  -6  -1    4.60    1.78
 -14  -6  -1    2.11    0.98
  14  -6   1    2.47    1.91
 -14  -6  -1    3.47    2.55
 -14  -6  -1    5.75    1.97
 -14  -6  -1    1.99    2.62
 -14  -6  -1    4.13    1.27
  14  -6   1    1.52    1.63
  14  -6   1    3.77    1.42
  14  -6   1    3.83    1.51
 -14  -6  -1    1.73    1.76
  14  -6   1    3.33    1.89
 -14  -6  -1    2.19    1.49
 -14  -6  -1    0.70    1.73
  14  -6   1    2.40    2.11
 -14   6  -1    3.09    0.91
 -14   6  -1    1.56    2.73
  14   6   1    4.78    1.42
  14   6   1    2.80    1.36
 -14   6  -1    3.83    1.30
  14   6   1    4.05    1.11
 -14   6  -1    1.70    2.35
 -14   6  -1    6.18    1.53
 -14   6  -1    3.54    0.69
 -14   6  -1    3.65    1.36
 -14   6  -1    2.30    1.77
 -14   6  -1    4.08    1.81
  14   6   1    3.48    2.00
  14   6   1    3.21    1.81
  14   6   1    2.85    1.62
  14   6   1    3.79    2.28
  14   6   1    3.11    1.15
  14   6   1    4.04    1.89
 -15  -7   1   -0.93    2.63
  15  -7  -1    1.01    0.96
 -15  -7   1    0.17    1.91
 -15  -7   1   -0.64    1.24
 -15  -7   1   -0.88    1.59
  15  -7  -1    0.89    1.76
 -15  -7   1    1.10    2.59
  15  -7  -1   -0.27    1.33
 -15  -7   1    2.76    2.88
  15  -7  -1    1.39    2.26
  15  -7  -1    1.06    2.39
 -15  -7   1    0.93    2.45
  15  -7  -1    0.46    1.62
  15  -7  -1   -1.60    1.97
 -15  -7   1   -1.40    2.13
  15  -7  -1    0.58    1.64
 -15  -7   1    1.96    1.83
  15   7  -1   -0.28    2.28
 -15   7   1   -0.47    1.87
 -15   7   1   -0.35    1.38
 -15   7   1   -0.19    1.59
  15   7  -1   -0.24    1.89
 -15   7   1   -0.78    1.08
  15   7  -1   -0.16    1.69
 -15   7   1    1.42    2.66
 -15   7   1   -0.21    1.64
 -15   7   1   -0.27    2.73
  15   7  -1    0.02    0.87
  15   7  -1   -0.32    1.16
  15   7  -1   -0.40    0.65
  15   7  -1   -1.62    2.16
 -15   7   1    0.04    2.01
 -15   7   1   -0.48    1.32
  15   7  -1   -0.52    2.42
  15   7  -1    0.28    1.55
 -13  -7   1   14.92    2.12
  13  -7  -1   17.49    2.21
  13  -7  -1   25.39    2.27
  13  -7  -1   20.66    2.37
  13  -7  -1   18.72    2.36
  13  -7  -1   17.58    1.92
 -13  -7   1   19.09    2.24
  13  -7  -1   21.34    2.27
 -13  -7   1   22.87    2.60
  13  -7  -1   19.90    2.40
 -13  -7   1   19.17    2.12
  13  -7  -1   19.00    2.12
 -13  -7   1   16.73    2.32
 -13  -7   1   16.46    2.25
 -13  -7   1   19.51    2.09
  13  -7  -1   23.19    2.63
 -13  -7   1   22.82    2.81
 -13   7   1   23.14    2.57
 -13   7   1   21.40    2.45
 -13   7   1   17.99    2.13
 -13   7   1   20.02    2.30
 -13   7   1   20.42    2.68
  13   7  -1   20.51    2.33
 -13   7   1   20.36    2.06
  13   7  -1   20.46    2.30
  13   7  -1   17.03    1.95
  13   7  -1   18.06    2.25
 -13   7   1   19.41    2.41
 -13   7   1   18.95    2.03
 -13   7   1   19.43    2.34
  13   7  -1   16.76    1.77
  13   7  -1   18.06    2.57
  13   7  -1   19.27    1.98
  13   7  -1   18.24    2.48
  13   7  -1   21.15    2.35
  13   7  -1   19.86    2.22
 -13   7   1   22.44    2.33
  11  -7  -1    0.54    0.79
  11  -7  -1    2.50    1.00
 -11  -7   1    1.11    1.20
 -11  -7   1    1.80    1.26
 -11  -7   1    2.00    0.83
  11  -7  -1    2.30    1.23
  11  -7  -1    2.20    0.82
  11  -7  -1    3.20    1.10
 -11  -7   1    4.15    1.48
 -11  -7   1    2.46    1.12
  11  -7  -1    2.08    1.17
 -11  -7   1    1.15    0.91
  11  -7  -1    1.20    0.58
  11  -7  -1    1.18    1.09
 -11  -7   1    0.42    0.81
 -11  -7   1    1.88    1.10
  11  -7  -1    2.36    0.95
 -11  -7   1    2.11    1.07
 -11   7   1    1.48    1.08
 -11   7   1    4.05    1.17
 -11   7   1    0.97    1.35
  11   7  -1    2.20    0.50
  11   7  -1    0.35    0.72
 -11   7   1    1.77    0.79
  11   7  -1    1.21    1.26
 -11   7   1    2.58    1.19
  11   7  -1    1.28    1.02
  11   7  -1    1.81    1.18
  11   7  -1    1.47    0.79
 -11   7   1    0.71    0.72
 -11   7   1    1.88    0.95
  11   7  -1    3.01    1.10
  11   7  -1    2.76    1.13
   9  -7  -1   20.48    2.27
   9  -7  -1   32.26    2.38
  -9  -7   1   20.31    2.17
  -9  -7   1   22.28    2.35
  -9  -7   1   25.12    2.27
  -9  -7   1   23.81    2.35
   9  -7  -1   23.73    2.29
   9  -7  -1   22.79    2.13
  -9  -7   1   23.31    2.17
   9  -7  -1   22.42    2.30
  -9  -7   1   23.41    2.16
   9  -7  -1   23.70    2.22
   9  -7  -1   21.87    2.08
  -9  -7   1   22.43    2.32
  -9  -7   1   26.53    2.21
   9  -7  -1   23.18    2.28
  -9   7   1   25.21    2.12
   9   7  -1   21.18    2.04
   9   7  -1   22.89    2.17
  -9   7   1   21.95    2.33
  -9   7   1   25.28    2.23
  -9   7   1   27.71    2.29
  -9   7   1   24.15    2.16
   9   7  -1   22.63    2.29
   9   7  -1   21.27    2.28
   9   7  -1   24.07    2.15
  -9   7   1   23.09    2.20
   9   7  -1   25.49    2.30
   9   7  -1   18.63    2.35
   9   7  -1   26.21    2.23
  -9   7   1   25.45    2.35
  -9   7   1   22.41    2.28
  -9   7   1   25.77    2.43
   7  -7  -1    9.91    0.98
  -7  -7   1    8.25    1.06
  -7  -7   1    6.60    0.87
   7  -7  -1    5.54    0.92
   7  -7  -1    8.83    1.02
   7  -7  -1    6.18    0.91
  -7  -7   1    7.58    0.94
  -7  -7   1    8.57    0.95
  -7  -7   1    8.64    0.95
   7  -7  -1    7.29    1.05
   7  -7  -1    5.73    0.97
  -7  -7   1    6.80    1.10
  -7  -7   1    7.48    0.93
   7  -7  -1   11.35    1.05
  -7  -7   1    6.92    1.05
  -7  -7   1    6.38    0.88
  -7  -7   1    7.41    0.86
   7  -7  -1    6.98    0.77
   7  -7  -1    6.62    0.92
  -7   7   1    7.81    0.90
   7   7  -1    9.00    1.04
   7   7  -1    6.83    0.93
  -7   7   1    7.19    0.85
   7   7  -1    9.58    0.99
  -7   7   1    7.06    0.85
  -7   7   1    6.71    0.96
  -7   7   1    8.50    0.92
  -7   7   1    7.68    1.05
  -7   7   1   11.17    1.06
   7   7  -1   10.99    1.21
   7   7  -1    7.82    0.82
  -7   7   1    6.69    0.99
   7   7  -1    7.98    0.96
   7   7  -1    8.48    1.07
   7   7  -1    5.50    0.75
   7   7  -1    7.20    0.84
  -7   7   1    7.54    0.97
   5  -7  -1   34.06    3.04
  -5  -7   1   35.12    3.02
  -5  -7   1   36.41    3.00
  -5  -7   1   35.18    3.05
  -5  -7   1   33.72    3.01
  -5  -7   1   31.43    3.01
   5  -7  -1   36.31    3.03
   5  -7  -1   31.45    2.96
  -5  -7   1   34.50    3.00
  -5  -7   1   33.87    3.01
   5  -7  -1   35.20    2.99
   5  -7  -1   34.32    3.03
   5  -7  -1   36.01    3.06
   5  -7  -1   33.13    2.96
   5  -7  -1   34.61    3.02
   5  -7  -1   36.21    3.03
  -5  -7   1   35.30    3.04
  -5  -7   1   31.62    2.98
   5  -7  -1   32.56    3.02
   5  -7  -1   36.35    3.05
  -5  -7   1   36.31    3.08
  -5  -7   1   37.60    3.08
  -5   7   1   38.18    3.04
   5   7  -1   30.91    2.98
  -5   7   1   35.80    3.04
  -5   7   1   37.95    3.03
   5   7  -1   35.32    3.05
   5   7  -1   31.62    2.95
   5   7  -1   33.51    2.95
  -5   7   1   36.23    2.98
   5   7  -1   36.88    3.01
   5   7  -1   37.49    3.01
  -5   7   1   34.97    3.01
   5   7  -1   36.81    3.04
  -5   7   1   34.88    3.01
   5   7  -1   34.64    3.05
  -5   7   1   35.09    3.00
  -5   7   1   36.58    3.07
   5   7  -1   35.88    3.02
  -5   7   1   36.59    2.99
   3  -7  -1   18.61    1.70
   3  -7  -1   18.91    1.79
  -3  -7   1   20.33    1.76
  -3  -7   1   18.90    1.75
   3  -7  -1   20.97    1.76
  -3  -7   1   20.08    1.75
   3  -7  -1   20.73    1.75
   3  -7  -1   20.44    1.79
  -3  -7   1   19.23    1.82
  -3  -7   1   19.94    1.76
   3  -7  -1   18.85    1.79
  -3  -7   1   17.68    1.74
   3  -7  -1   20.71    1.78
  -3  -7   1   18.72    1.76
  -3  -7   1   17.81    1.71
   3  -7  -1   19.28    1.74
  -3  -7   1   21.33    1.76
   3  -7  -1   20.91    1.77
   3  -7  -1   20.10    1.77
  -3  -7   1   18.54    1.77
  -3   7   1   20.56    1.76
  -3   7   1   18.75    1.72
  -3   7   1   19.17    1.81
   3   7  -1   23.57    1.76
  -3   7   1   17.01    1.77
   3   7  -1   20.09    1.78
   3   7  -1   20.41    1.77
  -3   7   1   23.98    1.80
  -3   7   1   21.05    1.75
   3   7  -1   20.33    1.67
   3   7  -1   21.52    1.81
   3   7  -1   17.56    1.70
   3   7  -1   20.48    1.75
  -3   7   1   20.04    1.72
   3   7  -1   19.51    1.79
  -3   7   1   19.16    1.76
  -3   7   1   19.99    1.78
   3   7  -1   17.89    1.75
   1  -7  -1   21.14    1.81
   1  -7  -1   20.30    1.90
  -1  -7   1   21.45    1.89
  -1  -7   1   21.41    1.86
   1  -7  -1   23.49    1.87
  -1  -7   1   24.70    1.90
  -1  -7   1   19.78    1.86
  -1  -7   1   22.15    1.84
   1  -7  -1   18.96    1.87
   1  -7  -1   19.78    1.90
   1  -7  -1   23.46    1.88
   1  -7  -1   20.77    1.88
  -1  -7   1   19.39    1.86
  -1  -7   1   20.51    1.84
   1  -7  -1   21.77    1.84
  -1  -7   1   22.58    1.86
  -1  -7   1   22.32    1.87
  -1   7   1   19.25    1.87
   1   7  -1   20.62    1.83
  -1   7   1   20.63    1.85
  -1   7   1   19.81    1.85
  -1   7   1   19.56    1.90
   1   7  -1   20.25    1.84
   1   7  -1   20.29    1.85
  -1   7   1   22.17    1.84
  -1   7   1   21.13    1.87
   1   7  -1   19.38    1.90
   1   7  -1   22.78    1.86
  -1   7   1   20.87    1.83
  -1   7   1   17.90    1.82
   1   7  -1   24.49    1.90
   1   7  -1   23.64    1.87
   1   7  -1   22.82    1.85
   1   7  -1   18.85    1.78
   1   7  -1   19.79    1.85
   1   7  -1   21.35    1.79
  -1   7   1   21.80    1.86
  -1   7   1   24.50    1.89
   1  -7   1    0.95    0.40
   1  -7   1    0.95    0.45
  -1  -7  -1    1.86    0.56
  -1  -7  -1    1.99    0.48
  -1  -7  -1    2.28    0.47
   1  -7   1    1.02    0.43
  -1  -7  -1    1.75    0.34
   1  -7   1    1.37    0.38
  -1  -7  -1    0.50    0.51
   1  -7   1    1.52    0.36
  -1  -7  -1    0.69    0.48
  -1  -7  -1    0.85    0.39
   1  -7   1    1.20    0.49
   1  -7   1    1.13    0.43
  -1  -7  -1    0.91    0.40
  -1  -7  -1    1.56    0.34
   1  -7   1    2.06    0.38
   1  -7   1    1.55    0.44
  -1   7  -1    0.79    0.48
  -1   7  -1    0.20    0.36
   1   7   1    2.39    0.44
  -1   7  -1    1.87    0.48
  -1   7  -1    1.31    0.46
   1   7   1    1.27    0.47
   1   7   1    1.67    0.45
   1   7   1    2.08    0.32
  -1   7  -1    1.55    0.35
  -1   7  -1    1.12    0.21
   1   7   1    1.17    0.42
   1   7   1    1.51    0.38
   1   7   1    1.05    0.43
  -1   7  -1    1.15    0.42
  -1   7  -1    1.52    0.45
   1   7   1    0.75    0.33
  -1   7  -1    1.64    0.40
  -1   7  -1    1.65    0.35
   1   7   1    1.73    0.41
   1   7   1    1.21    0.43
   3  -7   1    6.51    0.69
  -3  -7  -1    5.44    0.72
  -3  -7  -1    4.30    0.67
  -3  -7  -1    5.46    0.61
   3  -7   1    3.31    0.56
   3  -7   1    5.72    0.73
  -3  -7  -1    4.51    0.63
  -3  -7  -1    5.39    0.68
  -3  -7  -1    5.42    0.59
   3  -7   1    5.96    0.60
   3  -7   1    3.90    0.54
  -3  -7  -1    4.47    0.76
   3  -7   1    6.09    0.68
   3  -7   1    5.63    0.64
   3  -7   1    4.71    0.75
   3  -7   1    4.76    0.64
  -3  -7  -1    4.72    0.74
  -3  -7  -1    5.76    0.71
  -3  -7  -1    3.73    0.71
   3  -7   1    5.01    0.65
  -3   7  -1    5.08    0.58
  -3   7  -1    4.69    0.72
  -3   7  -1    4.45    0.68
  -3   7  -1    2.79    0.59
   3   7   1    5.41    0.65
  -3   7  -1    6.40    0.74
   3   7   1    5.32    0.69
   3   7   1    5.16    0.58
   3   7   1    4.49    0.70
  -3   7  -1    4.55    0.66
  -3   7  -1    4.17    0.61
   3   7   1    5.95    0.66
  -3   7  -1    5.20    0.67
   3   7   1    5.46    0.60
   3   7   1    6.77    0.73
   3   7   1    4.53    0.66
   3   7   1    5.85    0.69
  -3   7  -1    4.75    0.52
  -5  -7  -1    0.39    0.59
   5  -7   1    0.11    0.46
   5  -7   1    0.01    0.47
  -5  -7  -1   -0.30    0.43
  -5  -7  -1   -0.22    0.64
  -5  -7  -1    0.46    0.48
  -5  -7  -1   -0.16    0.60
  -5  -7  -1    0.36    0.50
  -5  -7  -1   -0.08    0.47
   5  -7   1   -0.50    0.59
   5  -7   1   -0.13    0.47
  -5  -7  -1    0.56    0.66
  -5  -7  -1    0.48    0.36
   5  -7   1   -0.13    0.55
   5  -7   1    0.01    0.41
  -5  -7  -1   -0.23    0.43
   5  -7   1   -0.35    0.63
  -5  -7  -1    0.09    0.66
   5  -7   1   -0.31    0.55
   5  -7   1    0.20    0.51
   5  -7   1    0.30    0.38
  -5   7  -1   -0.77    0.57
  -5   7  -1   -0.54    0.58
  -5   7  -1   -0.46    0.49
  -5   7  -1    0.06    0.47
  -5   7  -1    0.13    0.59
   5   7   1    0.15    0.52
   5   7   1   -0.02    0.62
  -5   7  -1    0.04    0.31
   5   7   1   -0.31    0.45
   5   7   1    0.08    0.42
   5   7   1   -0.15    0.67
  -5   7  -1   -0.02    0.46
  -5   7  -1    0.06    0.49
   5   7   1   -0.22    0.51
   5   7   1   -0.09    0.39
   5   7   1    0.14    0.42
  -5   7  -1    0.00    0.32
   7  -7   1  116.15    9.81
  -7  -7  -1  118.99    9.78
   7  -7   1  121.08    9.84
   7  -7   1  112.65    9.76
   7  -7   1  114.84    9.80
  -7  -7  -1  110.33    9.82
  -7  -7  -1  120.77    9.86
  -7  -7  -1  114.82    9.79
   7  -7   1  114.63    9.81
  -7  -7  -1  115.22    9.81
   7  -7   1  122.43    9.81
   7  -7   1  116.79    9.78
  -7  -7  -1  116.71    9.84
  -7  -7  -1  118.66    9.83
  -7  -7  -1  124.74    9.83
   7  -7   1  111.71    9.80
   7  -7   1  120.18    9.79
   7  -7   1  110.89    9.77
  -7  -7  -1  118.77    9.81
  -7   7  -1  109.22    9.79
  -7   7  -1  118.97    9.80
   7   7   1  119.96    9.79
  -7   7  -1  119.23    9.79
  -7   7  -1  119.40    9.82
   7   7   1  110.48    9.77
   7   7   1  113.54    9.84
  -7   7  -1  116.01    9.77
   7   7   1  122.17    9.81
   7   7   1  112.98    9.79
  -7   7  -1  112.41    9.74
   7   7   1  120.92    9.83
   7   7   1  125.11    9.79
  -7   7  -1  113.20    9.84
   7   7   1  114.40    9.78
  -7   7  -1  122.26    9.79
   9  -7   1   75.66    6.16
  -9  -7  -1   73.75    6.17
   9  -7   1   77.12    6.22
  -9  -7  -1   72.02    6.15
  -9  -7  -1   70.05    6.21
  -9  -7  -1   72.85    6.26
   9  -7   1   72.27    6.19
  -9  -7  -1   74.90    6.22
  -9  -7  -1   69.07    6.24
   9  -7   1   64.03    6.20
  -9  -7  -1   77.96    6.31
   9  -7   1   76.58    6.15
  -9  -7  -1   73.87    6.22
   9  -7   1   68.80    6.19
   9  -7   1   71.01    6.23
   9  -7   1   76.31    6.27
   9  -7   1   78.40    6.19
  -9  -7  -1   68.27    6.13
   9   7   1   67.09    6.13
  -9   7  -1   76.69    6.23
   9   7   1   75.68    6.19
   9   7   1   73.59    6.23
  -9   7  -1   71.06    6.24
  -9   7  -1   73.54    6.19
  -9   7  -1   74.21    6.28
  -9   7  -1   72.57    6.15
   9   7   1   69.42    6.26
   9   7   1   68.51    6.16
   9   7   1   68.63    6.15
  -9   7  -1   73.50    6.23
   9   7   1   75.64    6.19
  -9   7  -1   71.17    6.09
  -9   7  -1   74.00    6.15
   9   7   1   71.38    6.24
  11  -7   1    3.16    1.27
 -11  -7  -1    2.26    0.91
  11  -7   1    2.87    0.99
 -11  -7  -1    1.55    0.89
  11  -7   1    2.53    1.01
  11  -7   1    1.93    1.17
 -11  -7  -1    3.40    1.50
  11  -7   1    1.54    1.15
  11  -7   1    0.46    1.43
 -11  -7  -1    1.69    0.79
  11  -7   1    3.18    0.80
 -11  -7  -1    3.49    1.50
 -11  -7  -1    1.50    1.23
 -11  -7  -1    4.62    1.41
  11  -7   1    2.02    0.98
  11  -7   1    3.97    1.08
 -11  -7  -1    3.08    1.35
 -11   7  -1    3.93    1.14
  11   7   1    1.87    1.54
  11   7   1    2.79    0.87
 -11   7  -1    2.29    0.63
  11   7   1    3.22    1.27
 -11   7  -1    2.66    1.27
  11   7   1    3.11    0.80
 -11   7  -1    1.34    0.55
 -11   7  -1    2.04    1.61
  11   7   1    1.78    1.10
  11   7   1    1.95    1.11
 -11   7  -1    2.05    0.96
  11   7   1    3.79    1.24
 -11   7  -1    1.21    1.25
  11   7   1    3.77    1.06
 -11   7  -1    1.78    1.54
 -11   7  -1    1.24    0.93
  11   7   1    1.63    1.11
 -11   7  -1    0.91    0.98
  13  -7   1    0.12    1.26
  13  -7   1   -0.40    1.44
 -13  -7  -1    1.09    1.82
  13  -7   1    0.01    1.67
 -13  -7  -1   -1.41    1.78
 -13  -7  -1   -0.95    2.12
 -13  -7  -1    0.30    1.55
  13  -7   1    0.48    1.24
 -13  -7  -1    1.62    0.95
  13  -7   1    1.56    1.71
 -13  -7  -1    0.54    1.58
  13  -7   1    0.13    1.45
 -13  -7  -1   -0.76    1.09
  13  -7   1    0.82    1.98
  13  -7   1   -0.09    1.29
 -13  -7  -1    0.61    1.25
  13  -7   1    0.33    0.95
 -13   7  -1    0.37    0.58
 -13   7  -1   -1.20    1.37
 -13   7  -1   -0.34    1.73
  13   7   1    0.03    1.60
  13   7   1    0.56    0.92
  13   7   1    0.01    1.30
 -13   7  -1    0.33    0.69
 -13   7  -1   -0.08    1.31
 -13   7  -1   -0.29    1.13
 -13   7  -1    0.37    2.11
 -13   7  -1    0.43    1.19
 -13   7  -1    0.65    2.13
  13   7   1    0.05    1.61
  13   7   1    0.56    1.01
 -13   7  -1   -1.44    1.55
  13   7   1   -1.26    2.06
  13   7   1   -0.76    1.44
  13   7   1   -0.14    1.76
  13   7   1   -0.26    1.39
  15  -7   1    1.03    2.84
  15  -7   1    0.13    1.77
  15  -7   1    0.78    1.70
 -15  -7  -1    0.96    2.20
  15  -7   1   -0.88    1.95
 -15  -7  -1    1.59    2.47
  15  -7   1   -1.55    2.51
 -15  -7  -1   -0.26    2.08
 -15  -7  -1   -0.88    1.74
 -15  -7  -1    0.02    1.18
 -15  -7  -1    0.02    1.61
  15  -7   1   -0.68    1.67
 -15  -7  -1    0.14    3.36
 -15  -7  -1   -1.40    2.15
  15  -7   1   -0.83    2.29
 -15  -7  -1    0.55    3.25
  15   7   1   -0.44    1.28
 -15   7  -1   -0.06    3.12
  15   7   1   -0.56    1.90
  15   7   1    1.17    2.15
  15   7   1    1.17    2.96
  15   7   1   -0.53    1.13
  15   7   1    1.05    1.55
 -15   7  -1    1.62    2.17
 -15   7  -1    0.04    1.63
  15   7   1   -0.75    2.61
  15   7   1   -0.24    2.43
 -15   7  -1    0.44    1.59
 -15   7  -1    0.83    1.93
 -15   7  -1    0.57    0.88
 -15   7  -1   -0.44    0.62
  14  -8  -1    8.62    1.57
  14  -8  -1   11.48    2.43
  14  -8  -1    8.70    1.21
 -14  -8   1    9.03    2.21
  14  -8  -1    9.37    1.77
 -14  -8   1    6.58    1.77
  14  -8  -1    9.75    2.26
  14  -8  -1    7.20    1.79
 -14  -8   1    6.85    1.99
 -14  -8   1    9.16    1.90
  14  -8  -1   11.83    2.16
 -14  -8   1    5.28    2.76
 -14  -8   1    8.90    1.51
  14  -8  -1    7.78    1.92
 -14  -8   1   12.41    2.50
 -14   8   1   11.05    2.09
 -14   8   1    6.49    1.51
  14   8  -1    8.74    1.97
 -14   8   1    9.78    1.88
 -14   8   1   10.01    2.68
 -14   8   1   10.43    2.02
 -14   8   1   12.08    1.40
 -14   8   1   10.34    1.53
  14   8  -1    9.17    2.34
  14   8  -1   10.31    1.34
  14   8  -1    8.19    1.45
  14   8  -1   10.03    1.81
 -14   8   1   10.68    2.41
  14   8  -1   10.29    2.28
 -14   8   1   10.04    1.65
  12  -8  -1   18.83    1.94
  12  -8  -1   18.65    2.10
 -12  -8   1   14.54    1.99
  12  -8  -1   17.35    1.98
 -12  -8   1   13.92    1.86
  12  -8  -1   18.69    2.10
 -12  -8   1   12.05    1.89
  12  -8  -1   12.42    1.83
 -12  -8   1    9.75    2.06
  12  -8  -1   19.20    1.90
  12  -8  -1   16.53    2.17
 -12  -8   1   16.99    1.99
 -12  -8   1   14.56    1.83
 -12  -8   1   15.65    2.39
 -12  -8   1   13.92    1.84
  12  -8  -1   15.67    1.61
  12  -8  -1   17.04    1.99
 -12   8   1   16.08    1.87
  12   8  -1   15.84    2.00
 -12   8   1   14.81    2.09
 -12   8   1   16.20    1.94
 -12   8   1   17.96    2.19
  12   8  -1   14.46    1.50
  12   8  -1   12.99    1.97
 -12   8   1   16.90    2.37
 -12   8   1   16.54    1.77
  12   8  -1   14.10    1.79
  12   8  -1   13.28    1.85
  12   8  -1   12.45    1.75
  12   8  -1   18.93    1.80
  12   8  -1   18.32    2.34
  12   8  -1   15.71    1.90
 -12   8   1   18.39    2.07
 -12   8   1   16.49    1.91
  10  -8  -1   10.23    1.79
  10  -8  -1   15.78    1.68
  10  -8  -1   11.53    1.65
 -10  -8   1   18.41    1.76
 -10  -8   1   14.17    1.57
 -10  -8   1   14.12    1.69
 -10  -8   1   16.51    1.67
 -10  -8   1    9.96    1.72
  10  -8  -1   12.16    1.62
 -10  -8   1    9.40    1.69
 -10  -8   1   10.41    1.74
 -10  -8   1   15.58    1.55
  10  -8  -1   13.46    1.72
  10  -8  -1   14.23    1.41
 -10  -8   1   12.39    1.88
  10  -8  -1   16.67    1.73
  10  -8  -1   14.68    1.55
  10   8  -1   14.51    1.71
 -10   8   1   13.63    1.71
  10   8  -1   15.29    1.81
 -10   8   1   15.15    1.92
  10   8  -1   14.58    1.73
 -10   8   1   13.58    1.64
  10   8  -1   14.93    1.62
  10   8  -1   14.16    1.33
 -10   8   1   13.54    1.57
  10   8  -1   15.81    1.73
 -10   8   1   14.65    1.72
 -10   8   1   15.76    1.47
 -10   8   1   13.01    1.52
  10   8  -1   15.02    1.55
  10   8  -1   13.32    1.52
  -8  -8   1    0.69    0.66
   8  -8  -1    1.35    0.88
   8  -8  -1    1.68    0.89
   8  -8  -1    1.18    0.82
  -8  -8   1    3.14    0.92
   8  -8  -1    5.72    0.80
  -8  -8   1    1.18    0.68
   8  -8  -1    6.98    0.90
   8  -8  -1    0.98    0.47
   8  -8  -1    4.32    0.97
  -8  -8   1    1.28    0.79
   8  -8  -1    1.55    0.67
  -8  -8   1    2.00    0.75
  -8  -8   1    0.82    0.91
   8  -8  -1    3.35    1.02
   8  -8  -1    3.03    0.62
  -8  -8   1    2.14    0.81
  -8  -8   1    3.09    0.74
   8  -8  -1    1.10    0.75
  -8  -8   1    1.35    0.93
  -8   8   1    1.75    0.68
   8   8  -1    1.63    0.83
  -8   8   1    1.59    0.92
   8   8  -1    2.01    0.42
  -8   8   1    2.44    0.80
   8   8  -1    1.88    0.59
   8   8  -1    0.87    0.84
   8   8  -1    2.38    0.98
  -8   8   1    1.57    0.60
  -8   8   1    1.97    0.85
  -8   8   1    2.58    0.61
  -8   8   1    2.29    0.84
   8   8  -1    2.62    0.85
   8   8  -1    1.65    0.61
   8   8  -1    2.23    0.97
  -8   8   1   -0.12    0.78
  -8   8   1    2.10    0.69
   8   8  -1    1.72    0.76
   6  -8  -1   -0.02    0.66
   6  -8  -1   -0.18    0.67
   6  -8  -1    0.37    0.61
  -6  -8   1    0.54    0.76
   6  -8  -1   -0.72    0.66
   6  -8  -1   -0.25    0.59
  -6  -8   1    0.61    0.71
   6  -8  -1    1.14    0.71
  -6  -8   1   -0.29    0.53
  -6  -8   1    0.38    0.52
  -6  -8   1   -0.06    0.64
  -6  -8   1   -0.13    0.56
  -6  -8   1    0.17    0.58
  -6  -8   1   -0.17    0.48
   6  -8  -1    0.47    0.45
  -6  -8   1    0.22    0.77
   6  -8  -1    0.02    0.76
   6  -8  -1   -0.34    0.38
  -6  -8   1   -0.41    0.56
   6  -8  -1   -0.03    0.53
  -6  -8   1    1.20    0.62
   6  -8  -1    0.28    0.54
  -6   8   1    0.08    0.72
  -6   8   1    1.15    0.56
   6   8  -1    0.32    0.73
  -6   8   1   -0.17    0.77
  -6   8   1   -0.36    0.63
  -6   8   1   -0.04    0.49
   6   8  -1    0.86    0.35
   6   8  -1   -0.24    0.62
   6   8  -1    0.58    0.75
   6   8  -1   -0.08    0.31
  -6   8   1   -0.16    0.39
   6   8  -1    0.46    0.47
  -6   8   1    0.00    0.63
  -6   8   1    0.12    0.56
   6   8  -1    0.29    0.50
  -6   8   1    0.28    0.56
   6   8  -1   -0.16    0.60
   4  -8  -1   20.56    1.82
  -4  -8   1   20.31    1.83
  -4  -8   1   20.58    1.91
  -4  -8   1   19.90    1.81
   4  -8  -1   20.94    1.87
  -4  -8   1   20.04    1.83
   4  -8  -1   18.08    1.89
   4  -8  -1   21.42    1.87
  -4  -8   1   20.12    1.84
  -4  -8   1   18.02    1.78
  -4  -8   1   23.38    1.88
   4  -8  -1   20.51    1.87
   4  -8  -1   22.69    1.76
   4  -8  -1   16.33    1.85
  -4  -8   1   24.54    1.94
   4  -8  -1   20.60    1.83
  -4  -8   1   19.70    1.84
  -4  -8   1   18.45    1.80
   4  -8  -1   19.23    1.87
   4  -8  -1   19.99    1.85
  -4   8   1   21.63    1.88
   4   8  -1   19.91    1.86
   4   8  -1   21.65    1.89
  -4   8   1   17.84    1.82
   4   8  -1   20.87    1.75
  -4   8   1   19.29    1.87
   4   8  -1   17.72    1.86
  -4   8   1   18.72    1.81
  -4   8   1   20.12    1.77
   4   8  -1   22.25    1.83
  -4   8   1   19.87    1.85
  -4   8   1   18.99    1.78
  -4   8   1   20.31    1.91
  -4   8   1   22.89    1.86
   4   8  -1   17.78    1.89
   4   8  -1   20.04    1.73
   4   8  -1   20.39    1.83
  -2  -8   1   21.91    1.93
   2  -8  -1   22.13    1.95
   2  -8  -1   21.85    2.00
  -2  -8   1   22.55    1.92
   2  -8  -1   23.32    1.96
   2  -8  -1   23.48    1.91
  -2  -8   1   21.50    1.91
   2  -8  -1   22.29    1.95
   2  -8  -1   21.80    1.94
  -2  -8   1   22.17    1.92
   2  -8  -1   23.26    1.96
  -2  -8   1   18.85    1.93
  -2  -8   1   18.23    1.97
  -2  -8   1   23.11    1.95
   2  -8  -1   23.80    1.93
   2  -8  -1   21.57    1.86
  -2  -8   1   22.89    1.90
  -2  -8   1   19.00    1.93
   2   8  -1   21.27    1.83
  -2   8   1   22.51    1.89
  -2   8   1   19.35    1.95
  -2   8   1   20.57    1.88
  -2   8   1   21.62    1.96
  -2   8   1   20.45    1.87
  -2   8   1   21.00    1.92
   2   8  -1   19.95    1.91
   2   8  -1   20.77    1.87
  -2   8   1   21.87    1.92
   2   8  -1   22.29    1.93
   2   8  -1   20.41    1.95
   2   8  -1   21.90    1.92
   2   8  -1   17.82    1.95
  -2   8   1   23.09    1.93
   2   8  -1   21.46    1.96
  -2   8   1   22.35    1.95
   2   8  -1   22.65    1.92
  -2   8   1   21.37    1.94
   0  -8  -1   10.11    0.94
   0  -8  -1   10.47    1.05
   0  -8   1    9.10    1.07
   0  -8  -1   11.40    1.04
   0  -8  -1    9.90    1.03
   0  -8  -1    9.27    1.06
   0  -8  -1   10.06    1.07
   0  -8   1   10.49    0.99
   0  -8   1    7.15    0.98
   0  -8   1    9.26    0.97
   0  -8   1    9.66    0.99
   0  -8  -1   10.14    0.93
   0  -8   1    9.20    1.03
   0  -8   1    9.53    0.97
   0  -8  -1    9.31    1.08
   0  -8  -1   10.19    1.09
   0  -8   1    9.32    1.02
   0  -8   1    9.52    1.10
   0   8   1    9.96    1.12
   0   8  -1   10.31    0.99
   0   8   1   10.80    0.95
   0   8   1    8.64    1.00
   0   8   1    8.96    1.03
   0   8   1    8.98    0.99
   0   8  -1   10.17    1.03
   0   8  -1   10.42    1.03
   0   8  -1    9.81    0.96
   0   8   1    9.90    1.04
   0   8  -1    9.37    1.08
   0   8  -1    9.55    0.89
   0   8   1    9.69    1.00
   0   8  -1    9.60    1.02
   0   8  -1    8.75    0.84
   0   8   1    9.28    1.05
   0   8   1   10.02    0.94
   0   8  -1    9.58    1.04
   0   8   1    9.32    1.05
   0   8  -1   10.79    0.98
   2  -8   1    8.91    0.97
   2  -8   1    7.83    0.85
   2  -8   1    7.16    0.90
   2  -8   1    7.69    0.91
  -2  -8  -1    7.65    0.91
  -2  -8  -1    9.17    0.95
  -2  -8  -1    6.25    0.89
  -2  -8  -1    7.41    0.95
  -2  -8  -1    8.49    0.81
  -2  -8  -1    9.31    0.87
   2  -8   1    8.33    0.88
  -2  -8  -1    9.51    0.95
   2  -8   1    6.17    0.84
  -2  -8  -1    7.79    0.91
   2  -8   1    7.55    0.88
  -2  -8  -1    7.72    0.90
  -2  -8  -1    6.36    0.90
   2  -8   1    7.45    0.81
   2  -8   1    8.63    0.93
   2  -8   1    7.94    0.91
   2   8   1    9.20    0.93
  -2   8  -1    8.96    0.95
  -2   8  -1    8.12    0.84
  -2   8  -1    9.13    0.89
   2   8   1    9.31    0.93
   2   8   1    7.11    0.83
   2   8   1    8.22    0.91
  -2   8  -1    7.94    0.92
  -2   8  -1    5.89    0.83
  -2   8  -1    7.50    0.91
  -2   8  -1    7.64    0.88
   2   8   1    7.58    0.99
  -2   8  -1    8.65    0.94
   2   8   1    8.19    0.96
   2   8   1    8.84    0.90
   2   8   1    9.14    0.92
  -2   8  -1    8.21    0.73
   2   8   1    6.49    0.82
  -4  -8  -1   14.25    1.37
   4  -8   1   14.87    1.45
  -4  -8  -1   14.20    1.38
  -4  -8  -1   14.01    1.49
  -4  -8  -1   14.00    1.56
   4  -8   1   14.19    1.33
   4  -8   1   14.29    1.41
   4  -8   1   13.68    1.35
  -4  -8  -1   15.63    1.41
   4  -8   1   13.88    1.47
  -4  -8  -1   13.18    1.38
   4  -8   1   14.18    1.37
   4  -8   1   15.21    1.35
  -4  -8  -1   12.15    1.42
   4  -8   1   12.37    1.39
  -4  -8  -1   13.27    1.42
  -4  -8  -1   12.97    1.47
  -4  -8  -1   12.65    1.49
   4  -8   1   14.90    1.42
   4  -8   1   15.38    1.35
  -4  -8  -1   15.20    1.30
  -4   8  -1   15.11    1.47
  -4   8  -1   14.14    1.26
  -4   8  -1   11.27    1.36
   4   8   1   12.60    1.33
   4   8   1   12.87    1.33
  -4   8  -1   13.69    1.38
   4   8   1   14.76    1.40
  -4   8  -1   12.11    1.40
  -4   8  -1   14.20    1.50
   4   8   1   11.21    1.38
  -4   8  -1   14.43    1.45
   4   8   1   15.22    1.39
   4   8   1   14.82    1.46
  -4   8  -1   14.50    1.29
  -4   8  -1   15.10    1.34
   4   8   1   14.58    1.46
   4   8   1   16.11    1.39
   4   8   1   13.99    1.35
   6  -8   1   55.67    4.52
  -6  -8  -1   52.25    4.52
  -6  -8  -1   52.05    4.53
   6  -8   1   52.52    4.55
   6  -8   1   55.15    4.55
   6  -8   1   44.73    4.53
   6  -8   1   50.91    4.51
   6  -8   1   57.65    4.60
  -6  -8  -1   48.73    4.59
   6  -8   1   55.73    4.51
  -6  -8  -1   49.61    4.48
  -6  -8  -1   51.19    4.62
  -6  -8  -1   48.45    4.57
   6  -8   1   54.00    4.51
   6  -8   1   51.47    4.54
  -6  -8  -1   58.50    4.61
  -6  -8  -1   49.81    4.52
  -6  -8  -1   56.31    4.58
  -6  -8  -1   52.39    4.57
   6  -8   1   49.46    4.54
   6  -8   1   49.64    4.53
  -6  -8  -1   54.02    4.55
  -6   8  -1   50.51    4.59
  -6   8  -1   53.21    4.52
   6   8   1   54.41    4.55
   6   8   1   51.86    4.51
   6   8   1   51.69    4.51
  -6   8  -1   58.20    4.54
   6   8   1   51.52    4.49
  -6   8  -1   55.35    4.47
   6   8   1   53.40    4.61
   6   8   1   53.63    4.58
   6   8   1   53.03    4.55
   6   8   1   53.06    4.54
   6   8   1   53.94    4.52
  -6   8  -1   56.97    4.54
  -6   8  -1   55.50    4.58
  -6   8  -1   55.83    4.52
  -6   8  -1   53.87    4.53
   8  -8   1    8.37    1.22
  -8  -8  -1   11.62    1.56
   8  -8   1   10.61    1.26
  -8  -8  -1   10.54    1.30
  -8  -8  -1   11.62    1.26
   8  -8   1   10.26    1.23
  -8  -8  -1   10.38    1.29
   8  -8   1   12.44    1.35
   8  -8   1   10.38    1.19
  -8  -8  -1    7.81    1.54
   8  -8   1   11.28    1.26
  -8  -8  -1    7.10    1.32
   8  -8   1   11.78    1.32
   8  -8   1   12.71    1.31
   8  -8   1   12.06    1.47
  -8  -8  -1   11.18    1.29
   8  -8   1    9.53    1.12
  -8  -8  -1    9.43    1.19
  -8   8  -1    9.81    1.07
   8   8   1   10.45    1.34
   8   8   1    9.86    1.15
  -8   8  -1   11.36    1.42
   8   8   1   12.64    1.30
   8   8   1   13.52    1.52
  -8   8  -1    8.75    1.21
  -8   8  -1   10.07    1.38
   8   8   1   11.92    1.39
   8   8   1    9.67    1.21
  -8   8  -1   11.65    1.28
  -8   8  -1   10.44    1.26
  -8   8  -1    9.89    1.15
  -8   8  -1   13.73    1.38
   8   8   1   11.26    1.27
   8   8   1    6.77    1.08
   8   8   1   10.00    1.31
  -8   8  -1    7.06    1.17
 -10  -8  -1   30.79    2.75
  10  -8   1   27.28    2.50
 -10  -8  -1   24.81    2.82
 -10  -8  -1   24.63    2.90
  10  -8   1   27.49    2.89
  10  -8   1   24.78    2.62
 -10  -8  -1   26.32    2.50
  10  -8   1   27.22    2.62
 -10  -8  -1   25.11    2.84
  10  -8   1   25.87    2.76
 -10  -8  -1   28.77    2.56
 -10  -8  -1   25.91    2.69
  10  -8   1   25.86    2.64
  10  -8   1   26.20    2.54
 -10  -8  -1   30.10    2.75
 -10  -8  -1   26.66    2.54
  10  -8   1   29.89    2.71
  10  -8   1   29.38    2.70
  10   8   1   29.16    2.65
  10   8   1   25.68    2.77
 -10   8  -1   27.04    2.51
  10   8   1   26.75    2.50
 -10   8  -1   29.06    2.84
 -10   8  -1   27.73    2.59
  10   8   1   22.49    2.54
  10   8   1   23.31    2.46
 -10   8  -1   28.31    2.73
  10   8   1   23.50    2.65
 -10   8  -1   28.26    2.37
 -10   8  -1   26.89    2.94
  10   8   1   32.51    2.81
 -10   8  -1   29.13    2.90
  10   8   1   25.85    2.90
 -10   8  -1   23.83    2.56
  12  -8   1   23.28    2.24
 -12  -8  -1   13.71    2.24
  12  -8   1   17.10    2.54
 -12  -8  -1   17.31    1.96
  12  -8   1   18.08    1.97
 -12  -8  -1   20.82    2.78
  12  -8   1   18.37    2.19
 -12  -8  -1   16.28    2.53
 -12  -8  -1   12.37    2.37
  12  -8   1   18.88    2.21
 -12  -8  -1   19.29    2.17
 -12  -8  -1   17.37    2.56
  12  -8   1   15.41    2.08
 -12  -8  -1   15.33    2.20
  12  -8   1   23.33    2.34
 -12  -8  -1   12.84    1.94
  12  -8   1   21.03    2.32
 -12   8  -1   17.91    2.07
  12   8   1   18.90    1.92
 -12   8  -1   18.99    2.51
  12   8   1   16.78    2.23
 -12   8  -1   17.69    2.15
  12   8   1   17.96    2.51
  12   8   1   19.04    2.13
 -12   8  -1   13.42    2.54
 -12   8  -1   25.75    2.54
 -12   8  -1   17.16    2.12
  12   8   1   21.94    2.52
 -12   8  -1   17.15    1.73
  12   8   1   15.48    2.09
 -12   8  -1   18.20    2.30
  12   8   1   17.94    2.07
 -12   8  -1   17.89    1.75
 -12   8  -1   20.16    2.20
  12   8   1   18.69    1.99
 -14  -8  -1    1.42    1.56
 -14  -8  -1    0.02    1.55
  14  -8   1   -1.40    2.70
  14  -8   1    1.48    2.37
  14  -8   1    0.87    1.56
 -14  -8  -1   -0.79    2.16
  14  -8   1   -0.17    1.54
  14  -8   1    0.16    1.60
  14  -8   1   -0.47    1.82
 -14  -8  -1    0.24    1.21
 -14  -8  -1    0.87    2.21
 -14  -8  -1    0.04    1.95
 -14  -8  -1    1.27    1.95
  14  -8   1    0.45    1.09
 -14  -8  -1    1.29    3.06
  14  -8   1   -1.05    2.13
  14   8   1    0.48    1.22
 -14   8  -1    0.14    0.62
 -14   8  -1    0.43    2.09
 -14   8  -1   -1.45    1.38
  14   8   1    0.82    1.03
  14   8   1   -0.26    2.13
  14   8   1    0.07    2.03
  14   8   1    0.12    1.83
  14   8   1   -0.07    1.62
  14   8   1    0.03    2.56
 -14   8  -1   -1.02    1.94
 -14   8  -1   -0.11    0.78
  14   8   1   -0.82    2.24
 -14   8  -1    2.44    2.72
 -14   8  -1    0.78    1.59
 -14   8  -1    2.88    2.58
  15  -9  -1    9.23    2.45
  15  -9  -1    4.26    1.98
 -15  -9   1    7.95    3.68
  15  -9  -1    6.89    1.98
  15  -9  -1    4.39    2.80
  15  -9  -1    6.48    3.02
  15  -9  -1    7.87    2.14
 -15  -9   1    5.06    1.57
 -15  -9   1    8.08    3.61
 -15  -9   1    3.83    2.13
 -15  -9   1    6.52    2.60
  15  -9  -1    5.82    1.77
 -15  -9   1    0.97    3.20
  15  -9  -1    4.15    1.17
 -15  -9   1    4.55    1.67
 -15  -9   1    7.14    2.15
 -15  -9   1    4.56    2.30
 -15   9   1    9.68    2.29
  15   9  -1    5.82    2.19
  15   9  -1    9.10    2.07
 -15   9   1    7.66    2.09
 -15   9   1    4.06    1.54
 -15   9   1    5.11    1.32
 -15   9   1    9.15    3.36
 -15   9   1    6.47    1.82
  15   9  -1    0.22    2.92
 -15   9   1    7.98    2.43
 -15   9   1   10.70    3.43
  15   9  -1    4.64    1.49
  15   9  -1    4.32    0.88
 -15   9   1    5.29    1.66
  15   9  -1    4.43    1.33
  13  -9  -1   -0.07    1.54
 -13  -9   1   -1.55    1.91
  13  -9  -1    0.02    1.37
  13  -9  -1    0.30    1.38
  13  -9  -1   -0.03    1.75
  13  -9  -1    1.53    1.75
  13  -9  -1   -0.79    2.08
 -13  -9   1    0.75    1.57
 -13  -9   1    2.37    2.49
  13  -9  -1    0.63    1.94
  13  -9  -1    0.03    1.53
 -13  -9   1   -0.34    1.49
 -13  -9   1    0.31    2.10
 -13  -9   1   -0.37    1.72
 -13  -9   1    0.24    1.15
  13  -9  -1    0.94    0.83
  13   9  -1   -0.52    1.32
  13   9  -1   -0.16    1.12
 -13   9   1    0.02    2.11
  13   9  -1   -0.09    1.08
 -13   9   1    0.06    1.14
  13   9  -1    1.58    1.88
  13   9  -1    0.13    0.62
 -13   9   1   -0.50    1.05
  13   9  -1   -0.19    1.66
 -13   9   1    0.49    1.68
  13   9  -1    1.05    1.96
 -13   9   1   -0.70    2.32
 -13   9   1    0.25    1.22
  13   9  -1    0.91    1.50
  13   9  -1   -0.90    1.98
 -13   9   1   -0.19    1.68
  11  -9  -1    2.82    1.40
  11  -9  -1    2.02    1.12
 -11  -9   1    1.63    1.26
  11  -9  -1    1.98    1.63
  11  -9  -1    1.76    1.23
  11  -9  -1    1.26    1.51
 -11  -9   1    1.38    1.53
 -11  -9   1    2.42    1.15
 -11  -9   1    1.99    1.17
 -11  -9   1    1.72    1.36
  11  -9  -1    1.37    1.26
 -11  -9   1    1.57    1.40
  11  -9  -1    3.11    0.70
 -11  -9   1    2.44    0.99
  11  -9  -1    1.89    1.03
 -11  -9   1    4.76    1.41
 -11  -9   1    0.91    0.99
 -11   9   1    4.55    1.33
  11   9  -1    2.93    0.60
 -11   9   1    3.10    1.02
  11   9  -1    3.52    1.46
 -11   9   1    2.62    0.90
 -11   9   1    3.88    1.00
 -11   9   1    1.92    1.15
 -11   9   1    3.63    1.36
 -11   9   1    2.41    1.53
 -11   9   1    2.45    1.37
  11   9  -1    2.68    0.95
  11   9  -1    2.78    1.16
  11   9  -1    1.98    0.90
  11   9  -1    2.54    1.41
  11   9  -1    3.14    1.06
 -11   9   1    2.63    1.60
   9  -9  -1    4.89    1.16
  -9  -9   1    7.80    1.13
  -9  -9   1    4.81    1.03
  -9  -9   1    4.83    1.36
  -9  -9   1    8.87    1.31
   9  -9  -1    8.18    1.33
   9  -9  -1    9.07    1.33
   9  -9  -1    6.33    1.07
   9  -9  -1   11.09    1.47
   9  -9  -1    6.19    0.89
   9  -9  -1    7.65    1.15
  -9  -9   1    8.63    1.38
   9  -9  -1    7.66    1.14
   9  -9  -1    5.28    1.29
   9  -9  -1    8.32    1.22
  -9  -9   1    6.22    1.19
  -9  -9   1    5.91    1.31
  -9  -9   1    6.18    1.07
   9  -9  -1    8.57    1.00
  -9  -9   1    6.81    1.15
  -9  -9   1    4.65    1.14
  -9   9   1    6.41    1.40
  -9   9   1   10.59    1.27
   9   9  -1    9.44    1.29
   9   9  -1   11.30    1.30
   9   9  -1    7.50    1.28
  -9   9   1    5.92    0.94
  -9   9   1    8.03    1.02
   9   9  -1    7.80    1.00
   9   9  -1    8.36    1.38
  -9   9   1    6.23    1.21
   9   9  -1    5.16    0.90
  -9   9   1    7.21    1.07
   9   9  -1    9.63    1.19
  -9   9   1    6.91    1.29
   9   9  -1    6.11    1.12
  -7  -9   1    0.06    0.64
  -7  -9   1    1.43    0.73
  -7  -9   1    0.70    0.68
   7  -9  -1    1.53    0.91
  -7  -9   1    3.23    0.81
   7  -9  -1    1.53    0.76
   7  -9  -1    3.54    0.91
  -7  -9   1    1.74    0.94
  -7  -9   1    1.50    0.88
   7  -9  -1    3.06    0.88
   7  -9  -1    1.96    0.92
   7  -9  -1    2.02    0.56
  -7  -9   1    1.93    0.95
  -7  -9   1    0.46    0.77
   7  -9  -1    1.54    0.69
   7  -9  -1    0.90    0.49
   7  -9  -1    1.07    0.80
   7  -9  -1    2.11    0.74
  -7  -9   1    0.67    0.91
  -7  -9   1    2.73    0.75
  -7  -9   1    2.20    0.79
   7  -9  -1    2.55    0.98
   7   9  -1    2.69    0.87
   7   9  -1    2.95    0.95
   7   9  -1    0.57    0.73
   7   9  -1    1.09    0.62
  -7   9   1    2.45    0.69
   7   9  -1    0.98    0.72
  -7   9   1    1.38    0.79
  -7   9   1    2.30    0.62
  -7   9   1    2.55    0.58
   7   9  -1    3.12    0.84
  -7   9   1    2.48    0.86
  -7   9   1    1.41    0.72
  -7   9   1    1.35    0.96
  -7   9   1    2.40    0.84
   7   9  -1    0.84    0.94
   7   9  -1    1.06    0.50
  -7   9   1    2.06    1.04
   7   9  -1    2.16    0.86
  -5  -9   1   38.96    3.38
  -5  -9   1   38.53    3.50
  -5  -9   1   36.06    3.51
   5  -9  -1   39.43    3.41
   5  -9  -1   40.06    3.44
   5  -9  -1   41.38    3.42
  -5  -9   1   42.69    3.46
   5  -9  -1   40.02    3.45
  -5  -9   1   36.74    3.40
  -5  -9   1   36.74    3.40
  -5  -9   1   42.15    3.41
  -5  -9   1   36.89    3.40
   5  -9  -1   42.88    3.41
   5  -9  -1   41.78    3.44
  -5  -9   1   42.15    3.44
   5  -9  -1   40.39    3.34
   5  -9  -1   38.61    3.40
   5  -9  -1   37.84    3.43
  -5  -9   1   35.55    3.47
  -5  -9   1   37.34    3.39
   5  -9  -1   37.25    3.45
  -5   9   1   38.87    3.46
   5   9  -1   34.33    3.43
  -5   9   1   40.65    3.49
   5   9  -1   34.58    3.38
  -5   9   1   42.11    3.45
   5   9  -1   39.76    3.31
   5   9  -1   39.26    3.42
  -5   9   1   36.16    3.40
  -5   9   1   42.20    3.40
  -5   9   1   40.55    3.37
   5   9  -1   36.69    3.47
   5   9  -1   40.44    3.41
  -5   9   1   38.14    3.43
   5   9  -1   41.32    3.42
   5   9  -1   38.40    3.46
  -5   9   1   42.20    3.45
   3  -9  -1    2.39    0.71
   3  -9  -1    2.26    0.67
  -3  -9   1    1.90    0.55
  -3  -9   1    2.51    0.60
   3  -9  -1    2.28    0.66
   3  -9  -1    2.08    0.80
   3  -9  -1    3.38    0.68
   3  -9  -1    3.20    0.66
   3  -9  -1    2.65    0.74
  -3  -9   1    4.61    0.72
  -3  -9   1    2.90    0.76
   3  -9  -1    2.99    0.46
   3  -9  -1    2.15    0.56
  -3  -9   1    2.87    0.60
  -3  -9   1    2.11    0.69
  -3  -9   1    4.03    0.82
  -3  -9   1    1.88    0.59
   3   9  -1    4.31    0.70
   3   9  -1    4.28    0.65
   3   9  -1    2.79    0.73
  -3   9   1    2.74    0.62
   3   9  -1    3.31    0.47
  -3   9   1    2.87    0.47
   3   9  -1    2.64    0.38
  -3   9   1    2.93    0.52
  -3   9   1    3.91    0.51
   3   9  -1    3.35    0.64
  -3   9   1    4.17    0.74
  -3   9   1    2.34    0.65
  -3   9   1    2.74    0.64
   3   9  -1    2.08    0.76
  -3   9   1    2.77    0.71
   3   9  -1    2.78    0.68
  -3   9   1    3.18    0.66
   3   9  -1    2.54    0.57
  -3   9   1    3.98    0.64
   1  -9  -1   83.28    7.34
   1  -9  -1   87.97    7.34
  -1  -9   1   86.67    7.32
   1  -9  -1   88.54    7.29
   1  -9  -1   84.43    7.33
   1  -9  -1   90.17    7.34
   1  -9  -1   88.47    7.34
  -1  -9   1   88.60    7.32
  -1  -9   1   90.97    7.33
  -1  -9   1   92.77    7.31
  -1  -9   1   86.39    7.33
  -1  -9   1   82.19    7.35
   1  -9  -1   86.47    7.33
  -1  -9   1   90.20    7.33
   1  -9  -1   90.15    7.36
  -1  -9   1   85.24    7.35
  -1  -9   1   93.68    7.31
   1  -9  -1   85.53    7.31
   1   9  -1   91.05    7.32
  -1   9   1   87.59    7.31
   1   9  -1   82.85    7.26
  -1   9   1   89.37    7.35
  -1   9   1   88.20    7.30
  -1   9   1   89.01    7.32
   1   9  -1   83.73    7.33
   1   9  -1   89.90    7.32
  -1   9   1   90.49    7.36
  -1   9   1   88.84    7.34
   1   9  -1   82.93    7.34
  -1   9   1   86.83    7.30
   1   9  -1   84.89    7.26
   1   9  -1   81.06    7.34
   1   9  -1   82.20    7.31
  -1   9   1   90.90    7.34
   1   9  -1   88.23    7.30
  -1   9   1   83.16    7.33
   1   9  -1   81.95    7.32
  -1   9   1   87.70    7.30
  -1   9   1   90.29    7.32
   1   9  -1   83.14    7.33
   1  -9   1    0.05    0.58
   1  -9   1    1.38    0.66
  -1  -9  -1    0.12    1.19
  -1  -9  -1    0.80    0.54
  -1  -9  -1    0.35    0.51
   1  -9   1    0.73    0.54
   1  -9   1    1.18    0.61
  -1  -9  -1    0.83    0.40
  -1  -9  -1    1.43    0.55
   1  -9   1    1.16    0.50
  -1  -9  -1    0.29    0.65
   1  -9   1    0.68    0.47
   1  -9   1    1.15    0.57
   1  -9   1    0.43    0.50
   1  -9   1    1.18    0.49
  -1  -9  -1    0.39    0.43
  -1  -9  -1    0.30    0.73
  -1  -9  -1    1.89    0.62
  -1   9  -1    0.00    0.49
   1   9   1    0.44    0.62
  -1   9  -1    0.65    0.23
   1   9   1   -0.23    0.42
   1   9   1    1.17    0.49
   1   9   1    1.80    0.60
  -1   9  -1    1.11    0.59
   1   9   1    1.13    0.52
   1   9   1    0.41    0.41
  -1   9  -1    0.69    0.66
   1   9   1   -0.15    0.51
   1   9   1    1.28    0.55
  -1   9  -1    1.54    0.62
   1   9   1    0.98    0.40
  -1   9  -1    0.66    0.51
  -1   9  -1    1.10    0.47
  -1   9  -1    0.84    0.39
  -1   9  -1    1.31    0.51
   1   9   1    1.31    0.65
  -1   9  -1    0.15    0.54
   3  -9   1   16.02    1.57
  -3  -9  -1   17.27    1.54
   3  -9   1   19.58    1.56
  -3  -9  -1   17.72    1.48
   3  -9   1   15.71    1.58
  -3  -9  -1   15.31    1.60
   3  -9   1   14.77    1.56
  -3  -9  -1   16.40    1.52
  -3  -9  -1   14.18    1.71
   3  -9   1   15.68    1.63
   3  -9   1   14.18    1.52
  -3  -9  -1   17.51    1.65
   3  -9   1   15.55    1.65
  -3  -9  -1   14.48    1.69
   3  -9   1   16.78    1.56
   3  -9   1   15.40    1.51
   3  -9   1   17.13    1.48
  -3  -9  -1   15.80    1.55
  -3  -9  -1   18.05    1.57
  -3   9  -1   15.55    1.54
   3   9   1   15.65    1.47
   3   9   1   17.85    1.54
  -3   9  -1   12.31    1.63
  -3   9  -1   16.31    1.68
  -3   9  -1   16.34    1.49
   3   9   1   14.07    1.60
   3   9   1   16.13    1.56
  -3   9  -1   16.75    1.56
   3   9   1   17.77    1.70
   3   9   1   16.49    1.48
   3   9   1   14.96    1.56
   3   9   1   16.62    1.56
  -3   9  -1   13.68    1.50
  -3   9  -1   18.15    1.63
  -3   9  -1   15.88    1.40
   3   9   1   12.85    1.52
   5  -9   1   -0.45    0.55
   5  -9   1   -0.12    0.75
   5  -9   1    0.40    0.64
  -5  -9  -1   -0.34    0.88
  -5  -9  -1    0.16    0.67
   5  -9   1   -0.26    0.60
   5  -9   1    0.00    0.57
  -5  -9  -1   -0.09    0.74
   5  -9   1   -0.24    0.56
  -5  -9  -1    0.03    0.47
  -5  -9  -1   -0.06    0.70
  -5  -9  -1    0.52    0.82
   5  -9   1    0.57    0.60
  -5  -9  -1    0.31    0.60
  -5  -9  -1    0.08    0.57
   5  -9   1   -0.61    0.84
   5  -9   1   -0.34    0.56
   5  -9   1   -0.12    0.67
  -5  -9  -1   -0.14    0.63
   5  -9   1   -0.70    0.75
  -5  -9  -1   -1.02    0.84
   5   9   1    0.11    0.71
   5   9   1   -0.91    0.86
  -5   9  -1    0.65    0.80
   5   9   1   -0.86    0.67
   5   9   1    0.15    0.49
  -5   9  -1    0.92    0.70
  -5   9  -1   -0.05    0.58
   5   9   1    0.28    0.74
   5   9   1   -0.99    0.73
   5   9   1    0.25    0.50
  -5   9  -1   -0.24    0.42
  -5   9  -1    0.45    0.84
   5   9   1   -0.04    0.57
   5   9   1    0.38    0.68
  -5   9  -1   -0.63    0.81
  -5   9  -1    0.26    0.56
  -5   9  -1   -0.20    0.39
  -5   9  -1    1.13    0.69
   7  -9   1   13.91    1.27
  -7  -9  -1    9.91    1.53
  -7  -9  -1   10.24    1.16
  -7  -9  -1    7.46    1.15
   7  -9   1   11.13    1.30
  -7  -9  -1    9.87    1.26
   7  -9   1    8.38    1.16
  -7  -9  -1    7.37    1.17
  -7  -9  -1   10.10    1.17
  -7  -9  -1    7.18    1.25
  -7  -9  -1   11.02    1.19
   7  -9   1    9.53    1.18
   7  -9   1    8.47    1.11
  -7  -9  -1   10.04    1.35
   7  -9   1    8.33    1.35
   7  -9   1    6.59    1.18
  -7  -9  -1    9.09    1.56
   7  -9   1    7.79    1.27
   7  -9   1   12.46    1.33
   7  -9   1   10.47    1.22
   7  -9   1   13.24    1.49
  -7   9  -1   12.62    1.38
  -7   9  -1   10.77    1.09
   7   9   1   11.18    1.24
   7   9   1    7.95    1.13
   7   9   1   11.24    1.30
  -7   9  -1    8.49    1.39
  -7   9  -1   11.27    1.17
   7   9   1    9.85    1.17
   7   9   1   12.83    1.17
   7   9   1   11.79    1.23
   7   9   1    9.29    1.11
  -7   9  -1   10.17    1.37
  -7   9  -1    8.60    1.21
   7   9   1    7.89    1.25
  -7   9  -1    9.64    1.26
  -7   9  -1   10.04    1.17
  -7   9  -1   10.45    1.07
   7   9   1    9.64    1.09
   9  -9   1    6.55    1.12
   9  -9   1    5.99    0.98
  -9  -9  -1    4.62    1.27
   9  -9   1    7.93    1.23
   9  -9   1    7.18    1.23
  -9  -9  -1    8.02    1.10
  -9  -9  -1    5.87    0.99
   9  -9   1    8.36    1.57
  -9  -9  -1    6.35    1.50
  -9  -9  -1    6.79    1.50
  -9  -9  -1    7.46    1.38
  -9  -9  -1    4.34    1.36
  -9  -9  -1    9.19    1.36
  -9  -9  -1    6.04    1.05
   9  -9   1    4.45    1.23
  -9  -9  -1    4.31    1.10
   9  -9   1    6.78    1.12
   9  -9   1    8.52    1.21
   9  -9   1    8.91    1.39
   9   9   1    5.94    1.02
  -9   9  -1    6.06    1.50
  -9   9  -1    5.76    1.17
  -9   9  -1    7.35    1.18
   9   9   1    9.11    1.31
  -9   9  -1    9.97    1.20
   9   9   1    9.24    1.36
   9   9   1    6.82    1.19
  -9   9  -1    8.79    1.35
   9   9   1    6.89    0.96
  -9   9  -1    6.85    0.99
   9   9   1    8.21    1.23
   9   9   1    8.28    1.40
  -9   9  -1    8.16    0.88
  -9   9  -1    6.22    1.47
   9   9   1    6.69    1.12
  -9   9  -1   10.91    1.52
  11  -9   1    0.79    1.64
  11  -9   1    3.00    1.32
 -11  -9  -1    0.76    1.10
 -11  -9  -1    1.05    0.99
  11  -9   1    2.23    1.37
  11  -9   1    1.31    1.82
  11  -9   1    1.02    0.87
 -11  -9  -1   -0.22    1.59
 -11  -9  -1    1.86    1.37
  11  -9   1    1.71    1.44
 -11  -9  -1    1.33    1.06
  11  -9   1    3.71    1.24
 -11  -9  -1    2.98    1.85
 -11  -9  -1    1.14    1.89
 -11  -9  -1    0.16    1.62
  11  -9   1    2.56    1.20
 -11  -9  -1    0.51    1.38
  11   9   1    0.54    1.29
 -11   9  -1    2.83    1.06
  11   9   1    5.05    1.66
  11   9   1    0.94    0.96
 -11   9  -1    2.38    0.69
  11   9   1    0.93    0.85
 -11   9  -1    0.33    1.72
 -11   9  -1    3.14    1.75
 -11   9  -1    2.04    1.14
 -11   9  -1    3.95    1.94
  11   9   1    1.24    1.76
 -11   9  -1    2.11    1.14
  11   9   1    0.51    1.14
  11   9   1    2.46    1.20
 -11   9  -1    3.52    1.25
  13  -9   1   -0.61    1.53
 -13  -9  -1    0.94    1.34
  13  -9   1   -0.26    1.14
 -13  -9  -1    0.10    2.11
  13  -9   1    1.58    1.49
 -13  -9  -1    1.13    2.54
 -13  -9  -1   -0.34    1.75
  13  -9   1   -0.42    1.44
  13  -9   1    1.76    2.48
 -13  -9  -1   -0.61    1.18
  13  -9   1   -0.79    1.98
  13  -9   1   -1.15    1.99
  13  -9   1   -1.75    1.65
 -13  -9  -1    0.39    2.76
 -13   9  -1   -0.24    0.79
 -13   9  -1    0.03    1.64
 -13   9  -1    0.36    2.55
  13   9   1    0.03    1.68
  13   9   1   -1.11    2.09
  13   9   1    2.15    2.41
  13   9   1   -0.46    1.02
 -13   9  -1    0.83    2.47
  13   9   1   -0.69    1.60
  13   9   1    2.13    1.69
  13   9   1    0.01    2.02
 -13   9  -1    0.39    1.56
  13   9   1   -0.15    1.87
  13   9   1   -1.10    1.13
 -13   9  -1   -0.47    1.85
 -13   9  -1    0.04    0.70
 -13   9  -1   -0.10    1.28
 -14 -10   1    9.11    2.66
 -14 -10   1    8.96    2.21
 -14 -10   1    9.67    3.01
 -14 -10   1   13.24    2.27
  14 -10  -1   15.66    2.31
  14 -10  -1    9.90    2.07
 -14 -10   1   13.33    1.92
  14 -10  -1   12.69    3.07
  14 -10  -1   16.46    2.49
  14 -10  -1    8.00    1.40
  14 -10  -1    9.78    2.08
 -14 -10   1   13.30    2.47
 -14 -10   1   10.32    3.94
 -14 -10   1   11.13    1.82
  14 -10  -1   10.39    2.20
 -14  10   1   12.78    1.80
  14  10  -1    7.58    2.07
 -14  10   1   12.18    1.85
 -14  10   1    9.23    1.63
  14  10  -1   10.75    1.72
 -14  10   1   16.90    2.19
 -14  10   1   14.16    2.43
  14  10  -1   11.73    2.18
  14  10  -1   13.81    2.86
 -14  10   1   12.38    3.08
  14  10  -1   11.82    1.38
 -14  10   1   10.39    2.16
 -14  10   1   11.68    3.16
 -14  10   1   14.93    2.54
  14  10  -1   13.60    2.38
  14  10  -1   11.14    2.65
  12 -10  -1    4.68    1.40
  12 -10  -1    9.31    2.06
 -12 -10   1    8.45    2.16
  12 -10  -1    7.68    1.72
 -12 -10   1    9.18    1.99
 -12 -10   1    5.66    2.00
  12 -10  -1   13.57    1.80
  12 -10  -1   10.70    2.24
 -12 -10   1    7.87    1.68
  12 -10  -1    7.03    1.71
  12 -10  -1    7.21    1.56
 -12 -10   1    9.29    1.69
  12 -10  -1    9.09    1.10
 -12 -10   1    7.03    1.81
  12 -10  -1    8.58    1.45
  12 -10  -1   15.26    2.18
 -12 -10   1    6.80    1.42
  12  10  -1    6.72    1.34
 -12  10   1   10.21    1.46
  12  10  -1    9.44    2.00
 -12  10   1   10.24    1.88
 -12  10   1   11.85    1.89
  12  10  -1    5.24    1.56
 -12  10   1    8.99    2.29
  12  10  -1    6.46    0.95
  12  10  -1    9.90    2.07
 -12  10   1    9.40    1.41
  12  10  -1    7.23    1.78
 -12  10   1    6.06    1.54
 -12  10   1    8.65    2.14
 -12  10   1    6.95    1.27
  12  10  -1    7.17    2.02
  12  10  -1    5.40    1.31
 -10 -10   1    0.95    1.29
  10 -10  -1    2.99    1.20
 -10 -10   1    1.10    1.51
  10 -10  -1    1.07    1.16
  10 -10  -1    1.74    1.10
  10 -10  -1    2.27    1.42
  10 -10  -1    3.50    1.56
  10 -10  -1    1.33    0.90
  10 -10  -1    0.83    1.38
  10 -10  -1    1.20    0.65
 -10 -10   1    1.92    1.39
  10 -10  -1    3.27    1.13
 -10 -10   1    0.70    1.05
  10 -10  -1    2.05    1.44
 -10 -10   1    3.13    0.98
 -10 -10   1    1.21    1.00
 -10 -10   1    0.70    1.44
 -10 -10   1    0.54    1.74
 -10 -10   1    1.43    0.97
  10 -10  -1   -0.03    1.09
  10  10  -1    0.96    0.57
  10  10  -1    2.92    1.41
 -10  10   1    1.44    1.14
  10  10  -1    0.24    1.27
 -10  10   1    1.39    1.32
 -10  10   1    2.13    1.29
 -10  10   1    1.52    0.94
 -10  10   1    1.44    0.82
  10  10  -1    1.91    1.12
  10  10  -1    1.32    1.50
  10  10  -1    0.12    0.88
 -10  10   1    4.87    1.61
  10  10  -1    4.05    1.68
 -10  10   1    1.93    0.86
 -10  10   1    2.30    1.53
 -10  10   1    2.76    0.86
  10  10  -1    0.20    0.78
  10  10  -1    2.27    1.56
  -8 -10   1   13.19    1.61
  -8 -10   1    7.27    1.79
   8 -10  -1   14.04    1.63
   8 -10  -1   13.95    1.68
   8 -10  -1   13.55    1.49
   8 -10  -1   20.36    1.74
  -8 -10   1   11.87    1.72
   8 -10  -1   15.37    1.71
   8 -10  -1   13.44    1.62
   8 -10  -1   13.06    1.69
  -8 -10   1   13.04    1.60
   8 -10  -1   11.08    1.39
   8 -10  -1   10.69    1.64
   8 -10  -1   13.99    1.82
  -8 -10   1   13.54    1.62
  -8 -10   1   14.72    1.76
  -8 -10   1    8.77    1.69
  -8 -10   1   13.43    1.59
  -8 -10   1   12.89    1.61
  -8 -10   1   11.80    1.57
   8 -10  -1   15.98    1.64
  -8 -10   1   12.48    1.57
  -8  10   1   13.11    1.41
  -8  10   1   12.75    1.56
   8  10  -1   12.88    1.65
  -8  10   1   20.30    1.83
   8  10  -1   16.32    1.65
  -8  10   1   16.58    1.69
   8  10  -1   13.09    1.58
  -8  10   1   14.86    1.73
  -8  10   1   17.88    1.72
   8  10  -1   12.92    1.46
  -8  10   1   16.63    1.88
   8  10  -1   12.75    1.32
   8  10  -1   14.64    1.54
  -8  10   1   12.83    1.50
   8  10  -1   16.22    1.81
   8  10  -1   14.28    1.62
   8  10  -1   12.46    1.39
   6 -10  -1    1.90    0.94
   6 -10  -1    2.03    0.94
  -6 -10   1    1.10    0.99
   6 -10  -1    1.11    1.03
   6 -10  -1    1.47    0.81
  -6 -10   1    3.43    1.18
   6 -10  -1    3.26    1.07
   6 -10  -1    2.61    0.73
  -6 -10   1    3.73    0.88
   6 -10  -1    1.47    0.89
   6 -10  -1    2.59    0.58
  -6 -10   1    1.58    0.82
  -6 -10   1    2.51    0.74
  -6 -10   1    2.08    1.01
  -6 -10   1    1.78    0.75
  -6 -10   1    1.01    0.71
   6 -10  -1    2.52    0.75
  -6 -10   1    2.59    0.74
   6 -10  -1    3.26    0.60
  -6 -10   1    1.28    0.84
   6 -10  -1    3.04    0.81
   6  10  -1    3.26    0.53
   6  10  -1    3.06    1.06
  -6  10   1    4.63    0.97
   6  10  -1    2.97    0.89
   6  10  -1    4.21    0.93
  -6  10   1    3.38    0.76
   6  10  -1    2.98    0.91
  -6  10   1    4.56    0.98
   6  10  -1    2.44    0.68
   6  10  -1    2.28    0.49
   6  10  -1    3.22    1.02
   6  10  -1    2.57    0.78
  -6  10   1    2.05    1.07
  -6  10   1    1.62    0.76
  -6  10   1    1.93    0.66
  -6  10   1    2.18    0.53
  -6  10   1    2.19    1.05
  -6  10   1    2.67    0.88
   4 -10  -1    1.29    0.45
  -4 -10   1    1.60    0.56
  -4 -10   1    1.31    0.72
   4 -10  -1    1.24    0.61
   4 -10  -1    0.91    0.67
  -4 -10   1   -0.14    0.83
  -4 -10   1    1.16    0.70
   4 -10  -1    0.50    0.80
  -4 -10   1    2.25    0.69
  -4 -10   1    0.96    0.92
   4 -10  -1    1.29    0.74
   4 -10  -1    0.19    0.69
   4 -10  -1    1.86    0.83
  -4 -10   1    1.62    0.58
   4 -10  -1    0.90    0.73
   4 -10  -1    1.64    0.71
  -4 -10   1    2.20    0.63
  -4 -10   1    0.61    0.81
   4  10  -1    1.21    0.82
  -4  10   1    0.06    0.65
  -4  10   1    1.51    0.46
   4  10  -1    0.68    0.70
  -4  10   1    2.50    0.82
  -4  10   1    1.04    0.54
   4  10  -1    1.60    0.36
   4  10  -1    1.75    0.60
   4  10  -1    0.96    0.44
  -4  10   1    1.29    0.77
  -4  10   1    1.34    0.85
   4  10  -1    0.99    0.85
  -4  10   1    2.18    0.68
   4  10  -1    0.87    0.59
   4  10  -1    0.85    0.65
   4  10  -1    1.56    0.87
  -4  10   1    1.77    0.90
  -4  10   1    2.05    0.75
   2 -10  -1  101.76    8.92
   2 -10  -1   99.78    8.92
  -2 -10   1  107.59    8.95
  -2 -10   1  107.99    8.97
  -2 -10   1  108.71    8.98
  -2 -10   1  112.64    8.95
  -2 -10   1  104.31    8.93
  -2 -10   1  108.85    8.94
   2 -10  -1  110.61    8.97
   2 -10  -1  107.09    8.89
   2 -10  -1  104.05    8.96
   2 -10  -1  110.21    8.97
   2 -10  -1  104.03    8.94
  -2 -10   1  107.04    8.92
   2 -10  -1  105.58    8.97
   2 -10  -1  107.04    8.94
  -2 -10   1  105.04    8.93
  -2 -10   1  101.44    8.94
   2  10  -1  112.52    8.96
   2  10  -1  108.87    8.93
   2  10  -1   98.90    8.96
   2  10  -1   99.25    8.90
  -2  10   1  110.52    8.93
  -2  10   1  102.00    8.95
  -2  10   1  105.11    8.90
  -2  10   1  107.06    8.91
   2  10  -1   99.47    8.92
  -2  10   1  115.33    8.97
  -2  10   1  111.12    8.95
  -2  10   1   97.50    8.93
  -2  10   1  100.78    8.94
   2  10  -1  106.61    8.86
   2  10  -1  118.24    8.96
   2  10  -1  106.12    8.93
   2  10  -1  110.01    8.92
  -2  10   1  109.52    8.96
  -2  10   1  107.35    8.90
   2  10  -1  105.95    8.87
   0 -10   1  342.97   28.92
   0 -10   1  330.89   28.91
   0 -10   1  355.59   28.93
   0 -10   1  336.91   28.94
   0 -10   1  359.14   28.91
   0 -10  -1  364.01   28.93
   0 -10  -1  349.26   28.94
   0 -10  -1  358.61   28.89
   0 -10   1  355.86   28.94
   0 -10  -1  344.04   28.93
   0 -10   1  333.20   28.95
   0 -10  -1  363.15   28.93
   0 -10  -1  339.40   28.95
   0 -10  -1  341.70   28.94
   0 -10  -1  348.56   28.94
   0 -10   1  335.45   28.94
   0 -10   1  361.43   28.92
   0  10   1  356.57   28.92
   0  10   1  344.09   28.92
   0  10   1  348.15   28.92
   0  10  -1  349.08   28.92
   0  10   1  347.38   28.91
   0  10  -1  341.56   28.88
   0  10   1  350.82   28.94
   0  10  -1  353.16   28.93
   0  10   1  335.41   28.91
   0  10  -1  348.79   28.91
   0  10  -1  347.63   28.94
   0  10   1  335.73   28.94
   0  10   1  364.84   28.93
   0  10   1  345.88   28.91
   0  10  -1  343.16   28.91
   0  10   1  344.51   28.91
   0  10  -1  338.29   28.91
   0  10   1  354.71   28.90
   0  10  -1  347.51   28.93
   0  10  -1  343.45   28.86
   0  10  -1  345.96   28.93
  -2 -10  -1   16.70    1.65
  -2 -10  -1   15.64    1.75
  -2 -10  -1   14.37    1.45
   2 -10   1   17.72    1.56
   2 -10   1   14.95    1.60
   2 -10   1   15.39    1.53
  -2 -10  -1   15.01    1.55
  -2 -10  -1   15.54    1.52
  -2 -10  -1   14.49    1.55
   2 -10   1   16.94    1.57
   2 -10   1   12.45    1.49
  -2 -10  -1   16.20    1.50
   2 -10   1   16.30    1.62
   2 -10   1   14.25    1.51
   2 -10   1   14.83    1.52
  -2 -10  -1   19.53    1.70
   2 -10   1   14.48    1.55
  -2 -10  -1   17.68    1.51
  -2  10  -1   16.62    1.60
  -2  10  -1   13.78    1.70
  -2  10  -1   15.73    1.34
  -2  10  -1   19.49    1.53
   2  10   1   14.69    1.53
  -2  10  -1   16.48    1.49
  -2  10  -1   13.23    1.52
   2  10   1   15.27    1.44
   2  10   1   18.13    1.56
   2  10   1   14.12    1.60
   2  10   1   12.69    1.54
   2  10   1   15.83    1.57
   2  10   1   13.27    1.62
  -2  10  -1   11.15    1.49
   2  10   1   15.64    1.50
   2  10   1   15.09    1.46
  -2  10  -1   14.90    1.57
  -2  10  -1   13.59    1.47
  -4 -10  -1    0.53    0.51
   4 -10   1   -0.40    0.62
   4 -10   1    0.14    0.81
  -4 -10  -1   -0.07    0.86
   4 -10   1   -0.92    0.75
   4 -10   1   -0.11    0.57
   4 -10   1    0.53    0.66
   4 -10   1   -0.51    0.77
  -4 -10  -1    0.07    0.66
  -4 -10  -1    0.05    0.92
  -4 -10  -1    0.16    0.96
  -4 -10  -1   -0.27    0.66
   4 -10   1    0.13    0.63
  -4 -10  -1    0.34    0.67
   4 -10   1    0.19    0.60
  -4 -10  -1    0.24    0.61
  -4 -10  -1   -0.43    0.90
  -4 -10  -1    0.16    0.74
  -4  10  -1    0.77    0.89
  -4  10  -1    0.53    0.64
  -4  10  -1   -0.24    0.72
   4  10   1   -0.57    0.49
   4  10   1   -0.42    0.71
  -4  10  -1    0.18    0.52
  -4  10  -1   -0.06    0.51
   4  10   1   -0.22    0.91
  -4  10  -1    0.06    0.75
   4  10   1    0.00    0.77
   4  10   1    0.00    0.82
  -4  10  -1    0.84    0.90
  -4  10  -1   -0.57    0.85
  -4  10  -1    0.40    0.37
   4  10   1   -0.13    0.57
   4  10   1    0.56    0.70
   4  10   1    0.19    0.50
   4  10   1   -0.07    0.62
  -6 -10  -1    1.11    0.85
  -6 -10  -1    1.66    0.82
   6 -10   1    0.49    0.88
   6 -10   1    1.31    0.75
   6 -10   1    0.76    0.70
  -6 -10  -1    0.23    0.76
   6 -10   1    0.44    0.79
   6 -10   1    0.50    0.94
  -6 -10  -1    1.06    0.81
  -6 -10  -1   -0.09    1.02
   6 -10   1   -0.10    0.76
  -6 -10  -1    0.57    0.58
   6 -10   1    1.20    0.94
  -6 -10  -1    0.76    1.09
   6 -10   1    1.52    1.10
   6 -10   1    0.25    0.65
   6 -10   1    0.95    0.82
  -6 -10  -1    3.50    1.11
   6 -10   1    1.00    0.72
  -6 -10  -1    0.69    0.90
  -6 -10  -1    0.93    0.92
   6  10   1    1.90    0.94
   6  10   1    1.00    0.59
  -6  10  -1   -0.38    0.71
   6  10   1    1.33    1.08
  -6  10  -1   -0.42    1.00
   6  10   1    0.02    0.94
  -6  10  -1    0.54    0.56
   6  10   1    0.91    0.72
   6  10   1    0.51    0.87
   6  10   1    2.43    0.88
  -6  10  -1    2.22    0.89
   6  10   1   -0.12    0.79
  -6  10  -1    0.43    1.07
  -6  10  -1    0.58    0.69
  -6  10  -1    0.95    1.06
  -6  10  -1    1.26    0.86
   6  10   1    1.21    0.63
  -6  10  -1    1.26    0.50
   8 -10   1   28.09    3.12
   8 -10   1   31.58    2.89
  -8 -10  -1   28.68    3.22
   8 -10   1   33.81    3.03
  -8 -10  -1   31.52    3.18
  -8 -10  -1   30.59    2.88
  -8 -10  -1   29.41    2.82
  -8 -10  -1   31.07    3.05
   8 -10   1   31.32    2.97
   8 -10   1   33.59    3.04
   8 -10   1   29.93    2.94
   8 -10   1   33.00    2.83
   8 -10   1   30.26    2.92
  -8 -10  -1   33.40    2.90
  -8 -10  -1   29.86    2.99
  -8 -10  -1   34.26    3.16
   8 -10   1   35.83    2.89
  -8 -10  -1   32.45    3.10
   8 -10   1   30.79    2.90
   8 -10   1   31.40    2.83
  -8 -10  -1   28.16    2.78
  -8 -10  -1   33.24    3.06
   8  10   1   30.74    2.81
   8  10   1   27.70    2.75
   8  10   1   28.33    2.99
  -8  10  -1   33.91    2.76
  -8  10  -1   29.37    3.10
   8  10   1   29.45    2.84
   8  10   1   26.76    3.02
  -8  10  -1   35.99    2.88
  -8  10  -1   31.21    3.11
  -8  10  -1   30.98    2.72
   8  10   1   26.65    3.02
   8  10   1   28.97    3.00
  -8  10  -1   27.95    2.88
  -8  10  -1   31.22    2.90
  -8  10  -1   31.42    2.94
   8  10   1   27.74    2.90
  -8  10  -1   31.83    3.08
 -10 -10  -1   28.72    3.09
  10 -10   1   29.71    2.91
 -10 -10  -1   24.75    2.72
  10 -10   1   25.28    2.87
  10 -10   1   26.63    2.79
 -10 -10  -1   25.09    3.18
 -10 -10  -1   28.46    2.74
 -10 -10  -1   25.57    2.62
  10 -10   1   28.11    3.05
  10 -10   1   28.11    2.82
 -10 -10  -1   24.01    2.96
  10 -10   1   27.51    2.64
  10 -10   1   29.27    2.79
  10 -10   1   27.69    2.72
 -10 -10  -1   26.83    2.94
 -10 -10  -1   30.38    2.67
 -10 -10  -1   27.51    3.06
 -10 -10  -1   21.68    2.94
 -10  10  -1   28.69    2.78
  10  10   1   29.60    2.55
  10  10   1   28.23    2.99
 -10  10  -1   26.99    2.81
  10  10   1   26.04    2.64
 -10  10  -1   28.08    2.82
  10  10   1   30.83    2.83
 -10  10  -1   26.77    2.48
  10  10   1   25.40    3.00
 -10  10  -1   26.78    2.58
  10  10   1   28.00    2.98
 -10  10  -1   29.38    2.98
 -10  10  -1   29.40    3.19
  10  10   1   24.65    2.69
 -10  10  -1   24.06    2.96
  10  10   1   29.49    2.79
  10  10   1   28.78    2.89
 -10  10  -1   30.57    2.98
  12 -10   1    2.92    1.75
 -12 -10  -1   -0.92    2.50
 -12 -10  -1    2.68    1.78
 -12 -10  -1    1.99    2.03
 -12 -10  -1    5.30    1.95
  12 -10   1    5.76    2.00
 -12 -10  -1    3.01    1.35
 -12 -10  -1    4.22    1.26
  12 -10   1    4.81    1.62
  12 -10   1    2.71    1.10
  12 -10   1    1.60    1.48
 -12 -10  -1    4.27    2.51
 -12 -10  -1    2.56    1.52
  12 -10   1    4.63    1.86
  12 -10   1    6.49    1.91
  12 -10   1    2.30    1.56
  12 -10   1    5.08    2.03
 -12  10  -1    2.97    2.34
  12  10   1    5.25    2.15
 -12  10  -1    4.51    1.36
 -12  10  -1    5.71    2.56
 -12  10  -1    6.17    1.63
 -12  10  -1    3.02    0.87
  12  10   1    2.07    2.31
 -12  10  -1    3.75    0.86
  12  10   1    4.15    1.58
  12  10   1    3.61    1.20
  12  10   1    2.50    1.91
  12  10   1    4.19    1.55
  12  10   1    2.12    1.00
 -12  10  -1    3.57    1.58
 -12  10  -1    3.39    2.26
  12  10   1    3.71    2.37
 -12  10  -1    6.70    1.50
 -13 -11   1    2.54    1.53
 -13 -11   1    2.58    1.88
  13 -11  -1    4.94    1.79
  13 -11  -1    4.18    1.04
 -13 -11   1    3.87    1.93
 -13 -11   1    4.74    2.32
  13 -11  -1    5.79    1.61
  13 -11  -1    5.04    2.52
  13 -11  -1    5.21    1.85
 -13 -11   1    0.84    2.60
  13 -11  -1    6.68    2.77
  13 -11  -1    4.24    1.69
 -13 -11   1    4.71    1.56
  13 -11  -1    2.68    2.01
 -13 -11   1    5.73    2.08
 -13  11   1    5.05    1.58
  13  11  -1    1.78    1.97
 -13  11   1    1.34    2.71
 -13  11   1    5.88    1.50
 -13  11   1    6.33    2.28
 -13  11   1    1.81    1.22
 -13  11   1    6.37    2.77
 -13  11   1    5.18    2.18
  13  11  -1    3.79    2.20
  13  11  -1    0.05    2.27
  13  11  -1    3.78    0.83
  13  11  -1    2.99    1.34
  11 -11  -1    4.30    3.12
  11 -11  -1    3.92    1.91
 -11 -11   1    2.45    1.25
 -11 -11   1    1.37    1.38
  11 -11  -1    3.64    1.66
  11 -11  -1    2.23    1.15
 -11 -11   1    1.73    2.14
 -11 -11   1    2.82    1.30
 -11 -11   1    2.67    2.01
  11 -11  -1    3.39    1.48
  11 -11  -1    4.66    1.30
  11 -11  -1    2.08    1.51
  11 -11  -1    2.81    1.48
 -11 -11   1    4.37    1.29
  11 -11  -1    2.55    0.87
 -11 -11   1    4.57    1.83
 -11 -11   1    1.35    1.54
 -11  11   1    4.46    2.62
  11  11  -1    2.22    0.72
  11  11  -1    5.45    2.23
 -11  11   1    3.21    2.13
 -11  11   1    2.96    1.25
 -11  11   1    5.09    1.37
 -11  11   1    3.01    1.95
 -11  11   1    2.43    1.06
 -11  11   1    2.57    1.33
  11  11  -1    4.02    1.09
  11  11  -1    4.55    1.76
 -11  11   1    2.38    1.13
  11  11  -1    3.73    1.09
  11  11  -1    3.75    1.94
  11  11  -1    2.60    1.40
  11  11  -1    5.66    2.06
  11  11  -1    3.96    1.63
  -9 -11   1    0.89    1.22
  -9 -11   1    0.91    1.29
   9 -11  -1    1.30    1.06
  -9 -11   1    1.43    1.00
  -9 -11   1    0.40    1.43
   9 -11  -1    1.39    0.67
   9 -11  -1    1.58    1.20
   9 -11  -1    0.95    1.14
  -9 -11   1    0.75    1.40
  -9 -11   1    0.33    1.07
  -9 -11   1    2.49    1.05
  -9 -11   1    1.61    1.77
  -9 -11   1    0.29    0.96
   9 -11  -1    1.92    1.39
  -9 -11   1    0.51    1.22
   9 -11  -1    0.55    1.41
   9 -11  -1   -0.01    1.04
  -9 -11   1    1.18    1.55
   9 -11  -1    2.21    1.61
   9 -11  -1    1.05    1.16
   9 -11  -1    1.26    0.86
  -9  11   1    1.62    0.91
  -9  11   1    0.69    0.93
   9  11  -1    2.02    1.27
  -9  11   1    0.44    0.93
   9  11  -1    0.96    0.74
   9  11  -1   -0.09    0.88
  -9  11   1    0.15    1.46
   9  11  -1    2.08    1.27
  -9  11   1    2.56    1.54
  -9  11   1    1.38    1.04
  -9  11   1    1.64    1.27
   9  11  -1    1.58    1.58
   9  11  -1   -0.23    1.47
   9  11  -1    0.92    1.32
  -9  11   1    2.14    0.79
   9  11  -1    1.94    0.61
   9  11  -1    0.24    1.11
  -9  11   1    0.81    1.38
   7 -11  -1   20.88    2.21
   7 -11  -1   21.41    1.94
  -7 -11   1   21.78    2.19
  -7 -11   1   18.46    2.05
  -7 -11   1   20.15    2.08
  -7 -11   1   23.04    2.19
   7 -11  -1   21.25    2.18
  -7 -11   1   20.29    2.17
   7 -11  -1   20.87    2.07
   7 -11  -1   22.92    2.28
  -7 -11   1   19.61    2.25
   7 -11  -1   17.55    2.20
  -7 -11   1   22.23    2.35
   7 -11  -1   21.24    2.25
   7 -11  -1   18.09    2.08
   7 -11  -1   20.08    1.96
   7 -11  -1   23.33    2.16
  -7 -11   1   17.23    2.20
  -7 -11   1   15.71    2.19
  -7 -11   1   19.58    2.09
  -7 -11   1   19.52    2.06
   7 -11  -1   21.74    2.41
   7  11  -1   20.01    2.32
  -7  11   1   21.26    2.09
  -7  11   1   23.70    2.42
  -7  11   1   20.21    1.99
   7  11  -1   22.99    1.87
   7  11  -1   24.05    2.04
   7  11  -1   20.04    2.19
   7  11  -1   21.63    2.21
  -7  11   1   21.40    2.22
  -7  11   1   17.09    2.19
   7  11  -1   23.65    2.11
   7  11  -1   20.81    1.87
  -7  11   1   17.04    1.89
  -7  11   1   22.26    2.24
  -7  11   1   23.24    2.32
   7  11  -1   17.66    2.34
   7  11  -1   18.55    2.19
  -5 -11   1  100.62    8.90
   5 -11  -1  109.54    8.85
  -5 -11   1  110.20    8.95
   5 -11  -1  100.31    8.90
  -5 -11   1  105.86    8.91
  -5 -11   1  106.46    8.87
  -5 -11   1  104.27    8.89
  -5 -11   1  107.83    8.99
   5 -11  -1  107.83    8.94
  -5 -11   1  102.11    8.97
   5 -11  -1  115.65    8.97
   5 -11  -1  106.93    8.92
   5 -11  -1  108.17    8.96
  -5 -11   1  102.58    8.92
  -5 -11   1  106.44    8.92
   5 -11  -1  106.38    8.97
  -5 -11   1   93.53    8.90
   5 -11  -1  107.09    8.92
   5 -11  -1  112.11    8.94
   5  11  -1  108.49    8.93
   5  11  -1   97.92    8.93
  -5  11   1  111.39    8.90
  -5  11   1  103.23    8.92
  -5  11   1  113.40    8.95
   5  11  -1  102.14    8.95
   5  11  -1  100.75    8.95
   5  11  -1  109.70    8.92
  -5  11   1  108.49    8.85
   5  11  -1  102.88    8.90
   5  11  -1  105.79    8.90
  -5  11   1  106.37    8.98
  -5  11   1  104.03    8.90
   5  11  -1  103.81    8.81
   5  11  -1   98.88    8.84
  -5  11   1  110.17    8.88
  -5  11   1  103.27    8.94
  -5  11   1  106.75    8.93
   3 -11  -1   -0.40    0.78
   3 -11  -1    0.14    0.59
  -3 -11   1    0.14    0.67
   3 -11  -1    0.76    0.84
   3 -11  -1    0.54    0.99
  -3 -11   1   -0.08    0.69
  -3 -11   1    1.07    0.72
  -3 -11   1    0.20    0.72
  -3 -11   1   -0.24    0.84
   3 -11  -1   -0.51    0.86
  -3 -11   1    0.13    0.80
   3 -11  -1    0.29    0.47
   3 -11  -1   -0.01    0.76
  -3 -11   1   -0.45    0.63
  -3 -11   1    0.14    0.79
  -3 -11   1   -0.09    0.79
   3 -11  -1    0.21    0.67
   3 -11  -1   -0.79    0.64
   3  11  -1    0.42    0.71
  -3  11   1   -0.44    0.50
   3  11  -1    0.41    0.33
  -3  11   1   -0.18    0.83
  -3  11   1    0.38    0.46
  -3  11   1    0.18    0.85
   3  11  -1   -0.04    0.47
   3  11  -1   -0.37    0.60
  -3  11   1   -0.10    0.53
  -3  11   1    0.47    0.70
   3  11  -1   -0.20    0.82
  -3  11   1    0.54    0.88
   3  11  -1    0.28    0.61
  -3  11   1   -1.28    0.66
  -3  11   1    1.10    1.00
   3  11  -1   -0.73    0.70
   3  11  -1   -0.13    0.85
   3  11  -1   -0.18    0.72
  -3  11   1   -0.23    0.92
  -1 -11   1   16.55    1.62
  -1 -11   1   16.47    1.58
   1 -11  -1   14.29    1.67
   1 -11  -1   19.93    1.75
  -1 -11   1   13.08    1.59
  -1 -11   1   16.65    1.60
   1 -11  -1   14.61    1.65
   1 -11  -1   16.08    1.61
  -1 -11   1   18.27    1.70
   1 -11  -1   16.06    1.73
   1 -11  -1   17.17    1.50
  -1 -11   1   15.91    1.62
  -1 -11   1   16.38    1.73
   1 -11  -1   14.22    1.53
   1 -11  -1   17.63    1.74
  -1 -11   1   16.47    1.65
   1 -11  -1   14.48    1.70
   1  11  -1   18.12    1.66
   1  11  -1   19.30    1.77
  -1  11   1   15.20    1.60
   1  11  -1   17.29    1.66
  -1  11   1   16.93    1.63
  -1  11   1   16.18    1.72
  -1  11   1   14.36    1.47
   1  11  -1   15.20    1.39
   1  11  -1   12.82    1.54
  -1  11   1   13.85    1.66
   1  11  -1   16.39    1.48
   1  11  -1   13.60    1.58
   1  11  -1   15.19    1.73
  -1  11   1   13.51    1.62
   1  11  -1   13.15    1.58
   1  11  -1   14.33    1.35
  -1  11   1   13.45    1.66
  -1  11   1   17.03    1.58
   1  11  -1   16.67    1.70
  -1  11   1   14.41    1.47
  -1  11   1   19.68    1.61
   1 -11   1   25.11    2.10
  -1 -11  -1   24.97    2.22
   1 -11   1   19.84    2.09
   1 -11   1   23.38    2.11
   1 -11   1   19.87    2.17
   1 -11   1   18.41    2.12
  -1 -11  -1   21.26    2.23
  -1 -11  -1   20.30    2.00
  -1 -11  -1   22.15    2.11
  -1 -11  -1   25.53    2.15
  -1 -11  -1   24.44    2.03
  -1 -11  -1   21.70    2.22
  -1 -11  -1   23.79    2.13
   1 -11   1   23.68    2.15
   1 -11   1   19.27    2.05
  -1 -11  -1   24.27    2.29
  -1  11  -1   22.50    2.17
   1  11   1   22.28    2.13
  -1  11  -1   18.95    2.04
   1  11   1   21.07    2.18
   1  11   1   21.02    2.16
   1  11   1   21.33    2.26
  -1  11  -1   22.43    2.28
  -1  11  -1   22.06    1.89
  -1  11  -1   21.97    1.98
  -1  11  -1   20.36    2.03
   1  11   1   23.47    2.10
   1  11   1   24.01    2.01
   1  11   1   21.19    2.00
   1  11   1   24.58    2.15
   1  11   1   20.94    2.01
  -1  11  -1   20.69    2.13
   1  11   1   24.14    2.09
  -1  11  -1   20.97    2.22
  -1  11  -1   19.92    2.07
   1  11   1   22.38    2.08
  -1  11  -1   23.27    2.02
  -1  11  -1   23.14    2.16
   3 -11   1   37.16    3.33
   3 -11   1   38.97    3.30
  -3 -11  -1   36.79    3.34
   3 -11   1   39.82    3.36
   3 -11   1   36.48    3.37
  -3 -11  -1   39.62    3.37
  -3 -11  -1   40.82    3.29
  -3 -11  -1   32.19    3.40
  -3 -11  -1   35.09    3.32
  -3 -11  -1   42.60    3.43
   3 -11   1   39.73    3.45
   3 -11   1   36.33    3.30
  -3 -11  -1   40.63    3.45
   3 -11   1   37.60    3.39
  -3 -11  -1   34.89    3.29
   3 -11   1   39.04    3.31
  -3 -11  -1   37.34    3.36
  -3  11  -1   43.45    3.40
   3  11   1   39.41    3.46
  -3  11  -1   40.07    3.43
  -3  11  -1   32.31    3.30
   3  11   1   38.01    3.27
  -3  11  -1   42.12    3.35
   3  11   1   39.46    3.38
  -3  11  -1   32.41    3.42
   3  11   1   39.47    3.35
   3  11   1   37.97    3.24
  -3  11  -1   36.96    3.17
   3  11   1   38.90    3.39
   3  11   1   33.42    3.26
   3  11   1   33.63    3.31
  -3  11  -1   36.30    3.34
   3  11   1   37.47    3.27
  -3  11  -1   33.74    3.26
   5 -11   1   72.06    6.36
  -5 -11  -1   65.27    6.36
  -5 -11  -1   67.59    6.38
  -5 -11  -1   70.95    6.29
  -5 -11  -1   71.28    6.34
  -5 -11  -1   74.76    6.42
   5 -11   1   84.07    6.39
   5 -11   1   71.15    6.40
  -5 -11  -1   65.97    6.53
  -5 -11  -1   74.14    6.71
   5 -11   1   74.74    6.34
   5 -11   1   74.59    6.32
  -5 -11  -1   77.22    6.39
  -5 -11  -1   72.26    6.48
  -5 -11  -1   76.48    6.36
   5 -11   1   75.91    6.43
   5 -11   1   71.37    6.34
   5 -11   1   75.03    6.37
   5 -11   1   68.73    6.34
  -5 -11  -1   73.86    6.37
   5 -11   1   75.55    6.34
  -5  11  -1   83.01    6.41
   5  11   1   73.21    6.29
  -5  11  -1   73.93    6.33
  -5  11  -1   76.09    6.33
   5  11   1   76.97    6.39
  -5  11  -1   76.97    6.37
  -5  11  -1   78.41    6.44
   5  11   1   73.95    6.40
   5  11   1   71.73    6.38
  -5  11  -1   74.41    6.45
  -5  11  -1   75.90    6.26
  -5  11  -1   75.21    6.29
   5  11   1   76.69    6.36
   5  11   1   73.33    6.35
   5  11   1   76.18    6.30
  -5  11  -1   86.15    6.39
   5  11   1   75.30    6.30
   7 -11   1   15.35    1.75
   7 -11   1   14.42    1.63
   7 -11   1   14.07    1.52
  -7 -11  -1   13.68    1.72
   7 -11   1   15.77    1.69
   7 -11   1   16.88    1.63
   7 -11   1   12.39    1.80
   7 -11   1   13.45    1.92
   7 -11   1   16.44    1.74
  -7 -11  -1   11.65    1.82
   7 -11   1   12.65    1.55
  -7 -11  -1   14.49    1.89
  -7 -11  -1   12.29    1.62
   7 -11   1   13.24    1.78
  -7 -11  -1   15.57    1.70
  -7 -11  -1   11.96    1.63
  -7 -11  -1    7.83    1.84
   7 -11   1   16.00    1.83
  -7 -11  -1    7.47    1.92
  -7 -11  -1    9.50    1.88
  -7 -11  -1   11.15    1.69
  -7  11  -1   18.77    1.96
   7  11   1   14.65    1.61
  -7  11  -1   13.68    1.44
   7  11   1   17.81    1.82
  -7  11  -1   14.14    1.72
   7  11   1   16.11    1.73
  -7  11  -1   15.26    1.51
   7  11   1   13.42    1.56
  -7  11  -1   17.62    1.66
   7  11   1   13.97    1.56
   7  11   1   13.27    1.48
   7  11   1   15.86    1.87
  -7  11  -1   15.01    1.66
   7  11   1   11.93    1.73
   7  11   1   14.54    1.74
  -7  11  -1   12.10    1.70
  -7  11  -1   13.86    1.92
  -7  11  -1   18.56    1.89
  -9 -11  -1   32.93    3.51
   9 -11   1   28.45    2.91
  -9 -11  -1   28.93    2.88
  -9 -11  -1   27.26    3.01
   9 -11   1   27.40    2.94
  -9 -11  -1   27.29    2.79
  -9 -11  -1   26.42    3.19
   9 -11   1   37.43    2.98
   9 -11   1   28.35    3.09
  -9 -11  -1   26.22    3.11
  -9 -11  -1   27.42    2.71
   9 -11   1   28.66    2.73
  -9 -11  -1   28.37    3.16
  -9 -11  -1   27.31    2.85
   9 -11   1   27.67    3.24
  -9 -11  -1   32.66    3.33
   9 -11   1   27.57    2.94
   9 -11   1   32.01    3.01
   9 -11   1   25.91    3.07
   9 -11   1   26.82    2.92
  -9 -11  -1   32.31    3.05
   9  11   1   30.69    3.06
   9  11   1   26.96    2.91
   9  11   1   26.31    3.00
  -9  11  -1   29.28    3.05
  -9  11  -1   30.00    2.84
  -9  11  -1   27.07    2.62
   9  11   1   25.21    2.76
   9  11   1   25.23    2.63
   9  11   1   26.69    3.12
  -9  11  -1   30.80    3.22
   9  11   1   32.43    3.32
  -9  11  -1   31.36    2.67
  -9  11  -1   27.70    2.91
  -9  11  -1   30.50    3.24
   9  11   1   28.54    2.77
  -9  11  -1   28.79    2.91
   9  11   1   34.73    3.18
  -9  11  -1   30.13    2.82
  11 -11   1    0.71    2.26
 -11 -11  -1    2.03    1.43
  11 -11   1    2.59    2.00
  11 -11   1    0.71    1.68
 -11 -11  -1    1.89    1.60
  11 -11   1    1.22    1.43
 -11 -11  -1    1.87    1.23
 -11 -11  -1    2.37    1.44
 -11 -11  -1    3.35    2.26
  11 -11   1    0.98    1.65
  11 -11   1    3.93    1.48
 -11 -11  -1    2.10    2.42
 -11 -11  -1    0.11    1.77
  11 -11   1    2.57    1.55
 -11 -11  -1    1.99    1.96
  11 -11   1    2.41    1.05
 -11 -11  -1    2.98    1.12
 -11  11  -1    3.68    2.24
 -11  11  -1    1.22    0.86
  11  11   1    2.59    2.04
 -11  11  -1    3.05    1.20
 -11  11  -1    2.91    1.70
 -11  11  -1    0.71    1.74
  11  11   1    1.72    1.34
 -11  11  -1    2.11    1.27
  11  11   1    3.03    1.54
  11  11   1    3.52    2.27
 -11  11  -1    0.73    1.42
  11  11   1    1.48    1.84
 -11  11  -1    3.38    2.27
  11  11   1    2.45    1.19
  11  11   1    3.16    0.95
  11  11   1    3.49    1.91
  13 -11   1    0.69    3.14
 -13 -11  -1    1.72    2.24
  13 -11   1    1.75    2.34
  13 -11   1    1.82    2.33
 -13 -11  -1   -0.93    3.18
 -13 -11  -1    2.42    3.29
  13 -11   1    0.18    2.05
  13 -11   1    0.23    1.76
  13 -11   1    0.77    1.72
 -13 -11  -1   -0.64    1.72
 -13 -11  -1    1.45    1.48
 -13 -11  -1   -0.17    2.50
 -13 -11  -1    0.90    2.31
 -13 -11  -1    0.04    1.42
  13 -11   1   -0.94    2.70
  13 -11   1    0.51    1.27
 -13 -11  -1    0.35    1.60
  13  11   1    0.74    1.42
  13  11   1   -0.13    2.29
  13  11   1    2.54    3.00
 -13  11  -1    0.35    1.96
  13  11   1    0.48    1.94
 -13  11  -1   -0.11    0.90
 -13  11  -1   -1.51    2.14
 -13  11  -1   -0.13    0.92
 -13  11  -1   -0.42    1.67
 -13  11  -1    0.05    1.42
  13  11   1    1.65    2.71
  13  11   1    0.17    1.07
 -13  11  -1    2.00    2.35
 -13  11  -1    1.81    2.94
 -12 -12   1    3.01    1.55
  12 -12  -1    3.75    2.70
  12 -12  -1    4.20    1.64
  12 -12  -1    4.16    1.04
  12 -12  -1    2.96    2.45
 -12 -12   1    6.90    2.26
 -12 -12   1    4.53    1.93
  12 -12  -1    5.94    1.93
 -12 -12   1    4.37    1.84
  12 -12  -1    6.60    2.54
 -12 -12   1    3.36    1.55
  12 -12  -1    4.51    1.46
 -12 -12   1    4.99    2.61
 -12 -12   1    2.06    2.14
 -12 -12   1    4.67    1.55
 -12  12   1    4.01    1.39
  12  12  -1    2.10    1.50
  12  12  -1    4.43    2.55
 -12  12   1    4.28    2.07
  12  12  -1    5.14    1.98
 -12  12   1    5.79    1.72
 -12  12   1    3.24    2.69
  12  12  -1    4.68    1.37
 -12  12   1    6.96    2.86
  12  12  -1    3.31    0.87
  12  12  -1    5.43    1.80
 -12  12   1    6.93    1.52
 -12  12   1    6.88    2.26
  12  12  -1    3.32    2.38
 -12  12   1    5.53    2.18
 -10 -12   1    2.12    1.27
 -10 -12   1    4.26    1.80
 -10 -12   1    2.25    2.08
 -10 -12   1    4.64    1.40
 -10 -12   1    7.99    2.36
  10 -12  -1    5.34    1.60
  10 -12  -1    1.70    1.12
  10 -12  -1    4.77    1.49
  10 -12  -1    3.76    2.08
 -10 -12   1    3.93    1.59
  10 -12  -1    5.15    1.40
  10 -12  -1    5.13    1.78
  10 -12  -1    5.48    0.93
  10 -12  -1    5.20    1.86
 -10 -12   1    4.42    1.34
 -10 -12   1    5.22    1.64
 -10 -12   1    5.21    1.31
  10 -12  -1    3.31    1.57
  10 -12  -1    5.23    1.96
  10 -12  -1    3.78    1.37
 -10 -12   1    4.21    2.05
 -10  12   1    3.77    1.52
  10  12  -1    4.36    2.06
  10  12  -1    4.90    1.49
 -10  12   1    6.01    1.33
 -10  12   1    7.20    2.18
  10  12  -1    5.48    1.58
  10  12  -1    2.19    1.04
 -10  12   1    3.44    2.07
  10  12  -1    3.30    1.18
  10  12  -1    3.80    0.79
  10  12  -1    6.18    1.98
 -10  12   1    6.82    1.82
 -10  12   1    5.44    1.22
  10  12  -1    4.70    1.78
 -10  12   1    3.92    1.34
 -10  12   1    2.81    0.98
  -8 -12   1   -1.05    1.31
  -8 -12   1    1.06    1.49
  -8 -12   1    0.21    1.56
   8 -12  -1    0.54    1.18
   8 -12  -1    0.08    0.70
   8 -12  -1    1.21    1.47
  -8 -12   1   -0.66    0.98
  -8 -12   1   -0.73    1.23
  -8 -12   1   -0.34    1.02
  -8 -12   1    0.89    0.97
  -8 -12   1    0.38    1.28
   8 -12  -1   -0.52    1.41
   8 -12  -1    0.00    1.36
   8 -12  -1    0.97    0.79
   8 -12  -1    1.18    1.28
   8 -12  -1   -0.89    1.60
   8 -12  -1    0.75    1.02
  -8 -12   1    1.11    1.44
  -8 -12   1    1.29    1.64
  -8 -12   1   -0.34    1.07
   8 -12  -1   -0.25    1.15
   8  12  -1    1.10    1.27
   8  12  -1    0.20    1.23
  -8  12   1    0.71    1.06
  -8  12   1   -0.96    1.07
   8  12  -1    0.05    1.59
  -8  12   1    0.62    1.40
   8  12  -1    0.59    0.91
   8  12  -1   -1.15    1.44
  -8  12   1   -0.71    0.82
  -8  12   1    1.09    0.78
  -8  12   1    1.30    1.50
   8  12  -1    0.16    1.37
   8  12  -1    0.13    0.60
   8  12  -1    0.00    0.70
  -8  12   1    2.21    1.56
   8  12  -1    0.01    1.12
  -8  12   1   -1.34    1.69
  -8  12   1    0.27    1.27
  -6 -12   1    0.94    1.33
  -6 -12   1    1.01    1.18
   6 -12  -1    2.78    0.69
   6 -12  -1    1.05    0.89
   6 -12  -1    0.91    0.98
   6 -12  -1    1.81    1.09
   6 -12  -1    3.98    1.15
  -6 -12   1    2.33    1.07
  -6 -12   1    1.87    0.85
   6 -12  -1    2.40    1.18
   6 -12  -1    1.25    1.24
  -6 -12   1    1.17    1.53
  -6 -12   1    2.10    1.02
  -6 -12   1    2.44    1.05
   6 -12  -1    2.16    1.16
  -6 -12   1    2.11    1.35
  -6 -12   1    1.50    0.98
  -6 -12   1    0.34    0.90
  -6 -12   1    1.28    0.83
   6 -12  -1    1.61    1.20
  -6  12   1    1.64    1.27
   6  12  -1    1.35    1.09
   6  12  -1    1.60    1.34
   6  12  -1    0.58    0.96
  -6  12   1    1.37    0.96
  -6  12   1    1.12    0.74
  -6  12   1    1.09    0.84
   6  12  -1    1.18    0.86
   6  12  -1    1.30    0.51
   6  12  -1    2.18    1.15
   6  12  -1    2.57    0.87
  -6  12   1    1.14    1.24
  -6  12   1   -0.11    1.19
  -6  12   1    2.39    1.21
   6  12  -1    2.13    0.61
  -6  12   1    1.26    1.41
  -6  12   1    1.00    0.63
   6  12  -1    1.81    1.38
   4 -12  -1   43.88    3.69
   4 -12  -1   34.59    3.76
   4 -12  -1   43.22    4.25
  -4 -12   1   36.61    3.58
  -4 -12   1   41.74    3.61
  -4 -12   1   35.36    3.63
   4 -12  -1   42.13    3.65
   4 -12  -1   42.25    3.68
  -4 -12   1   38.68    3.73
  -4 -12   1   37.85    3.57
   4 -12  -1   40.09    3.63
  -4 -12   1   36.98    3.78
  -4 -12   1   44.92    3.62
   4 -12  -1   43.47    3.49
   4 -12  -1   39.58    3.56
  -4 -12   1   39.05    3.71
  -4 -12   1   40.37    3.64
  -4  12   1   43.19    3.78
  -4  12   1   41.73    3.53
   4  12  -1   34.81    3.54
  -4  12   1   42.16    3.60
  -4  12   1   39.55    3.57
  -4  12   1   39.17    3.68
   4  12  -1   40.31    3.72
   4  12  -1   44.04    3.60
  -4  12   1   42.06    3.67
   4  12  -1   40.08    3.63
   4  12  -1   37.94    3.66
   4  12  -1   39.30    3.47
  -4  12   1   43.13    3.47
   4  12  -1   40.62    3.41
   4  12  -1   36.18    3.72
  -4  12   1   40.88    3.65
   4  12  -1   39.13    3.65
  -4  12   1   43.40    3.80
   2 -12  -1    7.75    1.20
   2 -12  -1    8.80    0.97
  -2 -12   1    8.35    1.12
  -2 -12   1    8.36    1.22
  -2 -12   1    8.54    1.21
   2 -12  -1    9.30    1.29
  -2 -12   1    7.56    1.15
  -2 -12   1    8.39    1.32
   2 -12  -1    7.16    1.02
   2 -12  -1    8.98    1.19
  -2 -12   1    7.46    1.29
   2 -12  -1    6.91    1.18
  -2 -12   1    8.27    1.09
   2 -12  -1    7.53    1.15
   2 -12  -1   11.40    1.38
   2 -12  -1    8.63    1.46
  -2 -12   1    9.01    1.23
  -2 -12   1    9.26    1.45
   2  12  -1    8.24    1.28
   2  12  -1    7.73    0.85
  -2  12   1    9.13    1.25
   2  12  -1   10.85    1.38
   2  12  -1    8.28    1.15
  -2  12   1    8.30    1.00
   2  12  -1    8.47    0.86
  -2  12   1   10.36    1.33
  -2  12   1    8.42    0.99
  -2  12   1   10.31    1.19
  -2  12   1   11.58    1.28
   2  12  -1    9.69    1.19
   2  12  -1    9.17    1.07
  -2  12   1    8.27    1.13
  -2  12   1    8.07    1.00
   2  12  -1    8.02    1.27
  -2  12   1    9.62    1.46
  -2  12   1    8.88    1.30
   2  12  -1    7.20    1.22
  -2  12   1    9.79    1.44
   2  12  -1    6.49    1.06
   0 -12   1   34.83    3.28
   0 -12   1   35.37    3.12
   0 -12  -1   33.35    3.15
   0 -12   1   34.98    3.13
   0 -12   1   33.99    3.16
   0 -12  -1   35.74    3.25
   0 -12  -1   38.31    3.18
   0 -12   1   32.72    3.21
   0 -12  -1   33.90    3.08
   0 -12  -1   38.57    3.12
   0 -12   1   33.43    3.15
   0 -12  -1   34.29    3.31
   0 -12   1   34.41    3.19
   0 -12   1   38.82    3.13
   0 -12  -1   33.11    3.17
   0 -12  -1   36.73    3.26
   0 -12  -1   38.15    3.25
   0 -12   1   35.23    3.16
   0  12  -1   34.80    3.19
   0  12   1   33.02    3.03
   0  12  -1   32.62    2.93
   0  12   1   32.95    3.12
   0  12  -1   31.43    3.15
   0  12  -1   35.49    3.25
   0  12   1   36.87    3.17
   0  12  -1   33.27    3.11
   0  12   1   30.96    3.28
   0  12  -1   30.32    3.19
   0  12   1   37.66    3.13
   0  12   1   33.89    3.06
   0  12  -1   34.97    3.06
   0  12  -1   36.58    3.10
   0  12  -1   34.63    3.12
   0  12  -1   35.45    3.30
   0  12   1   32.28    3.22
   0  12  -1   35.13    2.98
   0  12   1   32.93    3.17
   0  12   1   37.37    3.19
   0  12   1   36.78    3.13
   0  12   1   35.99    3.05
   2 -12   1  131.08   10.56
  -2 -12  -1  125.34   10.58
  -2 -12  -1  130.47   10.60
   2 -12   1  124.31   10.57
   2 -12   1  123.88   10.60
   2 -12   1  131.12   10.58
  -2 -12  -1  116.36   10.50
   2 -12   1  124.89   10.61
  -2 -12  -1  131.41   10.60
  -2 -12  -1  133.52   10.70
   2 -12   1  125.57   10.56
  -2 -12  -1  118.14   10.63
   2 -12   1  128.70   10.56
   2 -12   1  124.48   10.56
   2 -12   1  132.33   10.54
  -2 -12  -1  123.40   10.55
  -2 -12  -1  119.62   10.51
  -2 -12  -1  113.32   10.56
  -2  12  -1  132.46   10.58
   2  12   1  128.02   10.52
   2  12   1  125.49   10.51
   2  12   1  122.35   10.55
  -2  12  -1  121.51   10.53
   2  12   1  131.72   10.52
   2  12   1  127.36   10.55
  -2  12  -1  120.22   10.57
  -2  12  -1  123.52   10.60
  -2  12  -1  129.48   10.57
  -2  12  -1  126.93   10.45
  -2  12  -1  121.83   10.61
   2  12   1  117.35   10.57
  -2  12  -1  127.01   10.53
   2  12   1  128.85   10.58
   2  12   1  126.25   10.62
  -2  12  -1  125.51   10.52
  -2  12  -1  124.39   10.54
  -4 -12  -1    3.82    1.33
   4 -12   1    0.66    0.96
  -4 -12  -1    2.22    0.93
  -4 -12  -1    3.13    1.35
  -4 -12  -1    1.66    0.90
   4 -12   1    3.33    0.90
  -4 -12  -1    3.15    0.94
   4 -12   1    2.94    0.88
   4 -12   1    2.87    1.13
   4 -12   1    2.64    1.11
  -4 -12  -1    1.58    0.68
  -4 -12  -1    3.72    1.28
   4 -12   1    1.84    0.97
  -4 -12  -1    0.98    1.07
   4 -12   1    1.88    0.90
   4 -12   1    1.81    0.83
  -4 -12  -1    2.76    1.27
   4 -12   1    3.01    1.30
  -4  12  -1    1.82    1.22
  -4  12  -1    0.88    0.89
  -4  12  -1    1.53    0.99
   4  12   1    3.08    0.81
   4  12   1    3.11    1.01
  -4  12  -1    3.20    1.08
  -4  12  -1    2.20    0.49
   4  12   1    1.66    1.29
   4  12   1    1.40    1.14
  -4  12  -1    2.41    1.21
   4  12   1    2.45    1.09
   4  12   1    1.91    0.76
  -4  12  -1    2.68    0.78
   4  12   1    0.70    1.08
   4  12   1    1.13    0.83
  -4  12  -1    2.63    1.22
  -4  12  -1    1.99    0.78
   4  12   1    3.12    0.69
  -6 -12  -1    8.05    1.30
   6 -12   1    6.51    1.37
   6 -12   1    9.28    1.63
   6 -12   1    4.93    1.23
   6 -12   1    5.62    1.23
   6 -12   1    4.74    1.03
   6 -12   1    6.39    1.13
   6 -12   1    4.22    1.11
  -6 -12  -1    4.81    1.58
  -6 -12  -1    6.03    1.56
  -6 -12  -1    4.62    1.15
  -6 -12  -1    8.81    1.53
  -6 -12  -1    5.44    1.59
  -6 -12  -1    4.87    0.92
  -6 -12  -1    5.68    1.34
   6 -12   1    5.03    1.40
   6 -12   1    5.46    1.18
   6 -12   1    8.47    1.11
  -6 -12  -1    7.40    1.27
  -6 -12  -1    6.82    1.21
  -6 -12  -1    6.65    1.29
  -6  12  -1    4.59    1.04
   6  12   1    9.44    1.47
  -6  12  -1    7.24    1.33
  -6  12  -1    7.77    1.59
   6  12   1    5.10    0.90
   6  12   1    6.11    1.40
   6  12   1    5.63    1.03
   6  12   1    4.13    0.94
  -6  12  -1    1.48    1.10
  -6  12  -1    5.56    0.95
  -6  12  -1    5.73    1.24
   6  12   1    4.61    1.32
   6  12   1    4.34    1.37
   6  12   1    4.74    1.00
  -6  12  -1    7.05    0.82
  -6  12  -1    7.25    1.59
  -6  12  -1    5.72    1.48
  -8 -12  -1    1.38    1.20
  -8 -12  -1    2.97    1.17
  -8 -12  -1    3.57    1.49
   8 -12   1    1.33    1.00
   8 -12   1    1.66    1.36
  -8 -12  -1    2.22    1.85
  -8 -12  -1    0.40    1.54
   8 -12   1    2.58    1.55
  -8 -12  -1    1.57    1.30
  -8 -12  -1    2.05    1.39
   8 -12   1    2.27    1.32
   8 -12   1    3.88    1.26
   8 -12   1    2.30    1.56
   8 -12   1    1.77    1.05
  -8 -12  -1    2.40    0.86
   8 -12   1    2.34    1.36
  -8 -12  -1    3.62    1.94
   8 -12   1    2.40    1.29
   8 -12   1    2.37    1.14
   8 -12   1    0.62    1.76
  -8 -12  -1    1.60    1.19
  -8 -12  -1    2.85    1.75
   8  12   1    1.04    1.24
  -8  12  -1    3.84    1.77
  -8  12  -1    2.15    0.83
   8  12   1    1.11    0.94
   8  12   1    2.91    1.48
   8  12   1    1.66    0.80
  -8  12  -1    2.36    1.42
  -8  12  -1    0.78    1.03
  -8  12  -1    3.03    1.37
   8  12   1    5.25    1.41
   8  12   1    2.51    1.59
  -8  12  -1    2.27    1.71
   8  12   1    1.40    1.08
  -8  12  -1    2.41    1.79
  -8  12  -1    2.19    1.12
   8  12   1    0.55    1.42
   8  12   1   -0.48    1.35
 -10 -12  -1    0.15    1.47
 -10 -12  -1    0.42    1.40
  10 -12   1   -1.39    1.05
 -10 -12  -1   -2.00    2.28
 -10 -12  -1    2.10    2.59
 -10 -12  -1    1.24    1.03
  10 -12   1    0.98    1.50
 -10 -12  -1   -0.76    1.90
  10 -12   1   -0.24    1.79
  10 -12   1    1.20    2.28
  10 -12   1   -0.64    1.34
  10 -12   1   -0.54    1.92
 -10 -12  -1    0.56    1.32
 -10 -12  -1   -0.95    1.71
 -10 -12  -1    0.18    1.73
  10 -12   1    0.90    1.50
  10 -12   1    1.15    1.31
 -10  12  -1    1.07    1.44
 -10  12  -1    0.86    2.14
  10  12   1    2.28    1.99
  10  12   1    0.25    1.75
  10  12   1   -0.04    1.25
 -10  12  -1    0.54    1.05
 -10  12  -1    0.25    1.72
 -10  12  -1    0.84    1.34
 -10  12  -1    0.67    2.20
  10  12   1    0.67    1.11
  10  12   1   -0.27    1.47
 -10  12  -1    0.03    1.46
  10  12   1    1.07    2.17
 -10  12  -1    0.70    0.94
  10  12   1    0.06    1.96
  10  12   1    1.95    0.88
 -12 -12  -1    7.66    1.91
 -12 -12  -1    5.26    2.52
 -12 -12  -1    9.89    3.30
 -12 -12  -1    9.51    2.49
  12 -12   1    7.58    2.17
 -12 -12  -1    4.78    1.74
  12 -12   1   11.83    2.76
  12 -12   1    9.32    2.63
  12 -12   1    7.37    1.99
  12 -12   1   12.21    2.23
  12 -12   1    4.80    3.18
  12 -12   1    6.13    2.26
  12 -12   1    8.35    1.46
 -12 -12  -1    6.39    1.76
 -12 -12  -1    6.23    3.17
 -12 -12  -1    5.99    1.50
  12 -12   1    6.04    1.91
 -12 -12  -1    7.33    2.61
  12  12   1    7.96    1.56
 -12  12  -1    6.77    1.22
  12  12   1    8.05    1.93
  12  12   1    8.89    2.11
 -12  12  -1    6.20    2.25
 -12  12  -1    4.32    2.24
 -12  12  -1   13.57    3.04
  12  12   1    5.16    1.85
  12  12   1    8.95    2.99
 -12  12  -1    5.85    1.81
  12  12   1    8.52    1.29
 -11 -13   1    6.98    1.81
  11 -13  -1    6.97    1.80
 -11 -13   1    1.33    1.64
  11 -13  -1    6.55    1.83
  11 -13  -1    5.43    1.88
  11 -13  -1    6.00    1.46
  11 -13  -1    5.79    1.95
  11 -13  -1    5.15    2.71
 -11 -13   1    4.17    2.38
  11 -13  -1    5.95    1.11
  11 -13  -1    9.66    2.59
 -11 -13   1    6.18    1.59
 -11 -13   1    7.24    2.19
  11 -13  -1    3.28    2.45
  11 -13  -1    5.34    1.74
 -11 -13   1    8.87    2.69
 -11 -13   1    3.11    2.27
 -11 -13   1    4.33    1.98
 -11 -13   1    5.40    1.67
  11  13  -1    7.06    1.96
  11  13  -1    4.89    0.99
 -11  13   1    8.98    1.64
  11  13  -1    7.90    2.40
  11  13  -1    3.76    2.50
 -11  13   1    4.72    1.46
 -11  13   1    6.86    1.25
  11  13  -1    5.94    1.83
 -11  13   1    5.15    2.81
 -11  13   1    6.97    1.72
 -11  13   1    6.28    1.93
  11  13  -1    3.24    1.44
 -11  13   1    5.49    2.72
  11  13  -1    3.74    1.33
  -9 -13   1    0.62    1.47
   9 -13  -1    0.18    1.84
  -9 -13   1    3.85    1.91
   9 -13  -1    2.22    1.77
   9 -13  -1    0.06    2.12
  -9 -13   1    0.98    1.30
   9 -13  -1    1.13    1.59
   9 -13  -1    0.79    1.30
  -9 -13   1    1.03    2.06
   9 -13  -1    0.66    1.00
  -9 -13   1    0.25    1.29
  -9 -13   1    0.50    2.19
  -9 -13   1    0.89    1.23
   9 -13  -1   -0.47    1.37
  -9 -13   1   -0.50    1.19
   9 -13  -1    0.33    1.61
  -9 -13   1    0.22    2.07
  -9 -13   1   -0.12    1.67
   9 -13  -1    0.60    0.84
   9 -13  -1    1.63    1.78
   9 -13  -1    0.99    1.59
   9  13  -1    0.63    0.74
  -9  13   1    0.32    2.11
   9  13  -1   -0.78    0.85
   9  13  -1    0.97    1.35
  -9  13   1    0.32    1.10
  -9  13   1   -1.46    1.98
  -9  13   1    0.51    1.28
   9  13  -1    1.79    1.92
  -9  13   1    0.59    1.70
   9  13  -1    1.17    1.55
  -9  13   1    0.07    0.88
  -9  13   1    1.45    1.27
  -9  13   1    0.19    1.61
   9  13  -1    1.18    2.16
   9  13  -1    0.44    1.94
   9  13  -1    2.06    1.14
  -7 -13   1    4.10    1.22
   7 -13  -1    1.24    1.15
   7 -13  -1    4.67    1.49
   7 -13  -1    3.35    1.29
   7 -13  -1    3.58    1.20
  -7 -13   1    3.09    1.33
   7 -13  -1    4.58    0.90
  -7 -13   1    3.86    1.51
  -7 -13   1    6.74    1.80
   7 -13  -1    5.30    1.48
  -7 -13   1    5.46    1.31
  -7 -13   1    1.95    1.09
  -7 -13   1    3.04    1.72
   7 -13  -1    3.67    0.90
   7 -13  -1    6.98    1.42
  -7 -13   1    2.55    1.69
  -7 -13   1    2.65    1.22
   7 -13  -1    5.09    1.62
  -7 -13   1    5.74    1.45
   7 -13  -1    5.23    1.45
  -7 -13   1    5.20    1.14
   7  13  -1    3.38    1.42
   7  13  -1    3.38    1.46
  -7  13   1    5.25    1.63
   7  13  -1    2.96    1.10
   7  13  -1    4.30    0.79
   7  13  -1    4.40    1.07
  -7  13   1    4.47    1.00
   7  13  -1    5.10    1.36
   7  13  -1    3.94    1.25
  -7  13   1    3.87    1.18
  -7  13   1    4.50    1.24
   7  13  -1    2.50    0.71
  -7  13   1    3.68    0.85
  -7  13   1    5.69    1.60
  -7  13   1    3.15    1.41
  -7  13   1    3.71    1.86
   7  13  -1    3.91    1.83
  -7  13   1    2.38    1.35
   5 -13  -1   22.35    2.49
  -5 -13   1   21.37    2.35
  -5 -13   1   22.90    2.39
   5 -13  -1   23.18    2.36
  -5 -13   1   19.70    2.24
  -5 -13   1   26.07    2.60
   5 -13  -1   22.00    2.39
   5 -13  -1   23.65    2.39
   5 -13  -1   21.65    2.61
  -5 -13   1   22.04    2.26
  -5 -13   1   23.52    2.52
  -5 -13   1   20.10    2.52
   5 -13  -1   20.04    2.08
   5 -13  -1   17.21    2.34
   5 -13  -1   19.07    2.18
   5 -13  -1   23.28    2.42
  -5 -13   1   23.80    2.24
  -5 -13   1   20.58    2.39
   5  13  -1   20.79    2.33
  -5  13   1   23.00    2.29
   5  13  -1   19.30    2.00
  -5  13   1   20.15    1.99
  -5  13   1   23.22    2.44
   5  13  -1   22.85    2.42
  -5  13   1   22.40    2.40
   5  13  -1   20.80    2.37
   5  13  -1   22.73    2.27
   5  13  -1   20.78    1.91
   5  13  -1   23.64    2.37
  -5  13   1   17.48    2.30
   5  13  -1   21.57    2.21
  -5  13   1   22.19    2.40
  -5  13   1   25.73    2.15
  -5  13   1   23.28    2.28
   5  13  -1   20.95    2.56
  -3 -13   1    1.25    1.04
  -3 -13   1    2.47    0.97
   3 -13  -1    4.27    1.25
   3 -13  -1    3.24    1.26
   3 -13  -1    4.84    1.11
   3 -13  -1    2.66    0.75
  -3 -13   1    3.12    1.06
  -3 -13   1    3.05    1.47
  -3 -13   1    2.39    0.85
   3 -13  -1    1.07    0.85
  -3 -13   1    4.02    1.20
   3 -13  -1    1.56    1.09
  -3 -13   1    3.58    1.25
   3 -13  -1    1.26    1.03
   3 -13  -1    2.08    1.37
  -3 -13   1    2.65    1.28
   3 -13  -1    2.35    1.01
  -3 -13   1    2.68    1.03
  -3  13   1    2.05    0.74
   3  13  -1    2.37    0.45
  -3  13   1    3.12    1.20
   3  13  -1    2.41    0.71
  -3  13   1    3.65    1.05
   3  13  -1    2.33    1.09
  -3  13   1    1.81    0.72
  -3  13   1    3.47    1.31
   3  13  -1    2.85    0.99
  -3  13   1    2.47    1.10
  -3  13   1    0.97    1.39
  -3  13   1    2.84    0.67
   3  13  -1    2.36    1.34
   3  13  -1    3.43    1.32
   3  13  -1    3.62    0.87
   3  13  -1    4.01    1.09
   3  13  -1    2.46    1.19
   3  13  -1    2.38    0.52
  -3  13   1    2.53    1.26
  -3  13   1    3.70    0.92
   1 -13  -1   28.26    2.84
   1 -13  -1   25.99    2.47
   1 -13  -1   28.01    2.59
  -1 -13   1   25.67    2.60
  -1 -13   1   23.69    2.62
   1 -13  -1   26.87    2.75
  -1 -13   1   31.48    2.65
  -1 -13   1   29.08    2.60
   1 -13  -1   24.53    2.59
  -1 -13   1   25.58    2.72
  -1 -13   1   26.62    2.71
  -1 -13   1   22.69    2.85
   1 -13  -1   27.74    2.74
   1 -13  -1   28.22    2.85
  -1 -13   1   29.63    2.56
  -1 -13   1   29.11    2.56
   1 -13  -1   21.93    2.47
   1 -13  -1   27.51    2.74
  -1  13   1   25.00    2.56
   1  13  -1   26.54    2.82
   1  13  -1   25.85    2.62
   1  13  -1   24.94    2.86
   1  13  -1   26.55    2.70
  -1  13   1   27.12    2.57
   1  13  -1   27.46    2.50
  -1  13   1   26.24    2.59
   1  13  -1   27.57    2.31
  -1  13   1   24.28    2.67
  -1  13   1   29.89    2.48
  -1  13   1   24.47    2.72
   1  13  -1   25.25    2.43
  -1  13   1   25.81    2.42
  -1  13   1   28.68    2.73
   1  13  -1   27.20    2.57
   1  13  -1   25.21    2.28
  -1  13   1   25.27    2.51
  -1  13   1   28.84    2.82
   1  13  -1   27.14    2.55
   1  13  -1   22.49    2.76
  -1  13   1   30.43    2.41
  -1 -13  -1    8.64    1.65
   1 -13   1   13.60    1.59
   1 -13   1    9.37    1.33
   1 -13   1    9.49    1.31
  -1 -13  -1   15.78    1.80
  -1 -13  -1   10.24    1.46
  -1 -13  -1   12.71    1.64
   1 -13   1    7.61    1.37
   1 -13   1   16.14    1.55
  -1 -13  -1    9.97    1.48
   1 -13   1    9.36    1.46
  -1 -13  -1   11.27    1.37
  -1 -13  -1   11.37    1.65
   1 -13   1    9.29    1.59
  -1 -13  -1   12.36    1.31
  -1 -13  -1    7.29    1.45
   1 -13   1   10.65    1.77
   1 -13   1    7.57    1.40
   1  13   1   11.93    1.55
  -1  13  -1   12.94    1.61
   1  13   1   11.18    1.30
   1  13   1   15.53    1.34
  -1  13  -1   11.55    1.33
  -1  13  -1   11.19    1.23
   1  13   1   17.26    1.65
   1  13   1   12.98    1.29
  -1  13  -1    8.95    1.38
  -1  13  -1   11.30    1.06
   1  13   1   14.26    1.57
   1  13   1   12.89    1.58
   1  13   1   13.72    1.38
  -1  13  -1    7.02    1.53
  -1  13  -1   12.35    1.40
   1  13   1   11.74    1.51
  -1  13  -1   10.85    1.31
  -1  13  -1   16.52    1.74
   1  13   1   12.77    1.50
  -1  13  -1   11.41    1.50
  -1  13  -1    9.56    1.67
   1  13   1   13.12    1.75
   3 -13   1    0.50    1.02
  -3 -13  -1    2.22    1.04
   3 -13   1    1.18    1.03
  -3 -13  -1    2.76    1.13
  -3 -13  -1    1.66    1.38
  -3 -13  -1    1.54    1.30
   3 -13   1    1.02    1.25
   3 -13   1    2.32    0.97
   3 -13   1    3.87    1.13
  -3 -13  -1    0.70    1.41
  -3 -13  -1    1.42    0.68
  -3 -13  -1    1.79    0.96
   3 -13   1    2.06    0.93
   3 -13   1    1.29    1.21
   3 -13   1    2.16    0.91
   3 -13   1    2.35    1.07
  -3 -13  -1    3.53    1.08
   3  13   1    3.60    1.10
  -3  13  -1    3.32    1.02
   3  13   1    1.61    0.84
  -3  13  -1    1.65    1.37
   3  13   1    3.67    1.02
  -3  13  -1    2.69    0.49
  -3  13  -1    4.03    0.84
   3  13   1    2.32    0.71
   3  13   1    1.97    1.07
  -3  13  -1    2.59    1.10
  -3  13  -1    2.94    1.34
  -3  13  -1    1.69    1.15
   3  13   1    2.79    1.24
   3  13   1    2.29    0.82
  -3  13  -1    0.33    1.05
   3  13   1    4.24    0.95
  -3  13  -1    2.87    0.92
   3  13   1    1.86    1.45
  -5 -13  -1    2.52    1.50
  -5 -13  -1    1.86    1.05
  -5 -13  -1    2.81    1.74
  -5 -13  -1    3.49    1.61
   5 -13   1    2.28    1.17
   5 -13   1    3.18    1.07
   5 -13   1    3.86    1.41
   5 -13   1    6.55    1.68
   5 -13   1    5.71    1.10
  -5 -13  -1    3.82    1.18
   5 -13   1    2.26    1.11
  -5 -13  -1    3.03    1.22
  -5 -13  -1    3.48    1.60
   5 -13   1    4.46    1.19
  -5 -13  -1    1.76    1.33
   5 -13   1    3.87    1.26
  -5 -13  -1    2.78    1.49
   5 -13   1    4.77    1.47
  -5 -13  -1    3.31    0.86
   5  13   1    5.72    1.50
   5  13   1    3.34    1.36
  -5  13  -1    3.14    1.02
  -5  13  -1    4.74    1.25
  -5  13  -1    6.15    1.04
   5  13   1    4.44    1.70
   5  13   1    4.36    0.98
   5  13   1    3.65    1.37
  -5  13  -1    3.96    1.35
   5  13   1    5.52    1.48
   5  13   1    4.17    0.99
  -5  13  -1    5.29    1.54
   5  13   1    4.87    0.83
   5  13   1    4.12    1.16
  -5  13  -1    5.42    1.12
  -5  13  -1    6.40    0.72
  -5  13  -1    2.06    1.55
   7 -13   1    0.08    1.29
   7 -13   1    0.25    1.20
   7 -13   1   -0.64    1.45
  -7 -13  -1    0.20    0.88
  -7 -13  -1   -0.12    1.84
   7 -13   1   -0.37    1.31
  -7 -13  -1    0.55    1.17
   7 -13   1   -1.46    1.77
  -7 -13  -1   -0.84    1.43
   7 -13   1    1.96    1.89
  -7 -13  -1    0.07    1.68
   7 -13   1    2.36    1.90
   7 -13   1    0.41    1.56
  -7 -13  -1   -0.25    1.36
  -7 -13  -1    0.04    1.44
  -7 -13  -1   -1.35    1.78
   7 -13   1    0.47    0.98
   7 -13   1    0.20    1.36
  -7 -13  -1    0.95    1.81
  -7 -13  -1    1.52    1.73
   7 -13   1    0.21    1.07
   7  13   1    0.25    0.98
   7  13   1    0.71    1.46
   7  13   1   -0.47    1.60
  -7  13  -1   -0.39    1.73
   7  13   1    1.15    1.30
  -7  13  -1   -1.67    1.80
   7  13   1   -0.80    1.42
  -7  13  -1    0.21    1.82
  -7  13  -1   -0.33    1.17
   7  13   1    0.88    1.41
   7  13   1   -0.18    1.01
  -7  13  -1    0.65    0.96
  -7  13  -1    1.54    1.66
  -7  13  -1    0.73    0.72
   7  13   1    1.10    0.84
  -7  13  -1   -0.04    1.27
  -7  13  -1    0.14    0.92
   7  13   1    2.68    1.83
  -9 -13  -1    0.51    2.15
  -9 -13  -1    1.16    1.47
   9 -13   1    1.01    2.36
   9 -13   1    0.21    1.92
  -9 -13  -1   -0.40    0.99
   9 -13   1    0.03    1.74
  -9 -13  -1   -0.38    2.45
  -9 -13  -1   -0.46    1.67
  -9 -13  -1   -1.33    1.97
  -9 -13  -1   -0.19    2.36
   9 -13   1   -0.37    1.58
  -9 -13  -1    0.29    1.49
   9 -13   1    0.17    1.90
   9 -13   1    0.57    1.63
   9 -13   1   -0.28    1.11
  -9 -13  -1    0.71    1.66
   9 -13   1    1.13    1.27
  -9 -13  -1    1.40    1.35
   9 -13   1   -0.03    1.33
   9 -13   1   -0.28    1.55
   9  13   1   -0.89    1.25
   9  13   1   -1.40    1.91
   9  13   1   -0.61    1.09
  -9  13  -1    0.76    2.26
   9  13   1    0.05    1.54
  -9  13  -1   -0.04    1.05
  -9  13  -1   -0.38    1.30
   9  13   1    1.08    2.11
  -9  13  -1   -0.49    0.98
  -9  13  -1   -0.06    1.41
  -9  13  -1    0.25    1.50
  -9  13  -1   -0.35    2.15
  -9  13  -1   -0.57    1.75
   9  13   1    0.02    0.92
   9  13   1    0.27    2.23
   9  13   1   -1.94    1.35
 -11 -13  -1    6.30    2.69
  11 -13   1    2.16    2.34
  11 -13   1    3.23    1.97
 -11 -13  -1    1.39    1.67
 -11 -13  -1    1.30    1.65
  11 -13   1    1.24    1.37
 -11 -13  -1    2.05    1.80
 -11 -13  -1    3.02    2.17
  11 -13   1    7.96    3.07
  11 -13   1    4.15    2.56
 -11 -13  -1    1.79    1.29
 -11 -13  -1    3.41    1.95
  11 -13   1    1.10    1.76
  11 -13   1    4.30    2.04
  11 -13   1    3.00    1.99
 -11 -13  -1    2.28    2.51
 -11  13  -1    3.29    1.37
  11  13   1    1.99    1.09
  11  13   1    0.32    1.88
  11  13   1    3.19    2.99
 -11  13  -1    2.86    2.36
 -11  13  -1    4.67    2.92
  11  13   1    6.62    4.31
  11  13   1    2.44    2.15
 -11  13  -1    3.90    1.87
 -11  13  -1    3.51    2.16
  11  13   1    1.34    2.56
  11  13   1    4.53    1.39
 -11  13  -1    2.08    1.73
  11  13   1    1.10    1.66
  10 -14  -1    4.33    2.22
  10 -14  -1    1.38    1.03
 -10 -14   1    2.75    2.61
  10 -14  -1    0.35    1.70
 -10 -14   1    1.51    1.62
  10 -14  -1    5.11    2.46
  10 -14  -1    2.65    1.96
 -10 -14   1    3.11    2.37
 -10 -14   1    1.18    2.16
 -10 -14   1    4.14    1.93
 -10 -14   1    3.70    2.37
  10 -14  -1    4.54    2.77
 -10 -14   1    4.31    1.66
  10 -14  -1    2.14    1.69
  10 -14  -1    2.00    1.32
 -10 -14   1    2.46    1.63
  10 -14  -1    4.62    2.55
 -10 -14   1    2.01    2.35
  10 -14  -1    1.51    1.64
 -10 -14   1    2.21    1.50
 -10  14   1    1.93    1.91
  10  14  -1    5.85    2.36
  10  14  -1    2.07    1.12
 -10  14   1    2.50    2.84
  10  14  -1    3.62    0.96
 -10  14   1    3.64    1.43
  10  14  -1    2.91    2.90
 -10  14   1    4.45    1.61
 -10  14   1    2.78    1.19
 -10  14   1    4.34    1.67
  10  14  -1    1.57    1.96
 -10  14   1    3.89    3.11
  10  14  -1    1.80    1.76
  10  14  -1    2.02    1.39
  -8 -14   1    5.55    2.05
   8 -14  -1    5.66    1.07
  -8 -14   1    4.74    1.42
  -8 -14   1    4.33    2.26
   8 -14  -1    7.32    1.79
  -8 -14   1    1.63    2.18
   8 -14  -1    5.61    2.24
  -8 -14   1    3.46    1.33
   8 -14  -1    3.70    1.71
  -8 -14   1    4.59    1.33
   8 -14  -1    8.45    1.63
   8 -14  -1    4.09    1.13
  -8 -14   1    2.66    1.89
   8 -14  -1    5.74    2.09
   8 -14  -1    5.27    1.86
  -8 -14   1    4.93    1.73
  -8 -14   1    5.59    2.66
   8 -14  -1    5.24    1.42
   8  14  -1    8.32    2.13
  -8  14   1    5.97    2.19
  -8  14   1    5.27    1.22
  -8  14   1    5.06    1.00
   8  14  -1    3.59    0.89
   8  14  -1    6.14    2.35
   8  14  -1    7.70    2.14
  -8  14   1    8.27    1.56
  -8  14   1    6.74    2.30
  -8  14   1    2.98    1.60
   8  14  -1    3.65    1.67
  -8  14   1    4.43    1.47
   8  14  -1    3.01    0.93
   8  14  -1    8.48    1.37
   8  14  -1    6.87    1.56
  -8  14   1    9.67    2.36
  -6 -14   1    2.43    1.74
   6 -14  -1    4.44    1.45
   6 -14  -1    2.41    1.47
  -6 -14   1    4.82    1.99
   6 -14  -1    2.77    1.59
  -6 -14   1    5.30    1.68
  -6 -14   1    2.94    1.42
   6 -14  -1    4.63    1.62
   6 -14  -1    4.04    1.20
   6 -14  -1    1.10    1.42
  -6 -14   1    4.44    1.44
   6 -14  -1    6.48    1.99
   6 -14  -1    6.81    1.75
   6 -14  -1    3.39    0.95
  -6 -14   1    5.68    1.67
   6 -14  -1    3.75    0.94
  -6 -14   1    3.33    1.24
  -6 -14   1    3.65    1.11
   6  14  -1    4.09    1.32
  -6  14   1    1.34    1.87
  -6  14   1    3.21    1.07
  -6  14   1    5.06    1.25
   6  14  -1    2.90    1.61
   6  14  -1    1.86    0.82
   6  14  -1    5.49    1.48
   6  14  -1    1.78    1.85
   6  14  -1    3.20    1.11
  -6  14   1    1.84    1.78
   6  14  -1    2.33    1.41
  -6  14   1    1.76    0.78
  -6  14   1    1.51    1.40
   6  14  -1    3.91    1.52
   6  14  -1    2.44    0.65
  -6  14   1    1.63    1.78
  -6  14   1    4.72    1.28
  -6  14   1    5.17    1.73
   4 -14  -1    4.82    1.39
  -4 -14   1    7.43    1.72
   4 -14  -1    3.95    1.19
  -4 -14   1    6.40    1.32
  -4 -14   1    9.20    1.62
   4 -14  -1    7.11    1.01
  -4 -14   1    3.39    1.87
   4 -14  -1    7.27    1.55
  -4 -14   1    7.09    1.43
   4 -14  -1    5.59    1.40
  -4 -14   1    4.50    1.33
  -4 -14   1    7.61    1.43
   4 -14  -1    7.98    1.81
  -4 -14   1    6.84    1.58
   4 -14  -1    5.69    1.57
   4 -14  -1    9.80    1.39
   4 -14  -1    6.13    1.43
   4  14  -1    5.78    1.44
  -4  14   1    5.31    1.22
   4  14  -1    6.76    1.74
   4  14  -1    6.18    0.98
   4  14  -1    7.14    1.80
  -4  14   1    6.77    1.37
  -4  14   1    4.99    1.82
   4  14  -1    8.31    1.18
  -4  14   1   11.23    1.72
  -4  14   1    5.15    1.27
  -4  14   1    8.08    1.65
   4  14  -1    5.77    0.73
   4  14  -1    5.81    1.41
   4  14  -1    9.63    1.61
  -4  14   1    9.72    1.65
  -4  14   1    7.71    0.92
   4  14  -1    6.54    1.32
  -4  14   1    8.22    1.08
   4  14  -1    4.63    0.83
  -2 -14   1   -0.41    1.07
   2 -14  -1    0.40    1.52
   2 -14  -1    0.68    1.64
   2 -14  -1   -0.26    0.99
   2 -14  -1    0.81    1.17
  -2 -14   1   -0.31    1.33
  -2 -14   1   -0.39    0.99
  -2 -14   1    1.18    1.65
  -2 -14   1    1.58    1.16
   2 -14  -1    0.20    1.36
   2 -14  -1   -1.07    1.28
  -2 -14   1    0.02    1.04
  -2 -14   1    0.78    1.37
  -2 -14   1    1.57    0.94
   2 -14  -1    0.60    0.80
  -2 -14   1   -0.69    1.03
   2 -14  -1   -0.27    0.83
   2 -14  -1   -0.26    1.11
  -2  14   1    1.17    1.27
   2  14  -1    0.51    1.37
  -2  14   1    1.18    1.12
   2  14  -1    0.27    1.19
   2  14  -1    2.14    1.10
   2  14  -1    0.03    1.32
   2  14  -1    0.41    0.91
   2  14  -1    0.53    0.44
  -2  14   1   -1.34    1.40
   2  14  -1    0.80    0.38
  -2  14   1   -0.70    1.31
   2  14  -1    0.65    0.94
  -2  14   1   -0.36    0.80
  -2  14   1    1.39    1.30
   2  14  -1    0.22    1.46
   2  14  -1    0.70    0.77
  -2  14   1   -0.07    1.05
  -2  14   1   -0.91    1.12
  -2  14   1   -0.24    0.80
  -2  14   1    0.36    0.64
   0 -14   1   18.94    1.98
   0 -14   1   15.80    2.14
   0 -14   1   18.82    2.36
   0 -14   1   17.97    2.22
   0 -14  -1   19.09    2.12
   0 -14  -1   21.69    2.06
   0 -14  -1   23.02    2.40
   0 -14  -1   17.57    2.17
   0 -14  -1   24.30    2.49
   0 -14  -1   20.65    2.27
   0 -14  -1   23.50    2.46
   0 -14   1   15.24    2.20
   0 -14   1   15.82    2.01
   0 -14  -1   18.87    2.19
   0 -14   1   23.10    2.18
   0 -14   1   18.43    2.18
   0 -14   1   19.24    2.12
   0 -14  -1   16.82    2.00
   0  14  -1   19.45    1.67
   0  14   1   19.66    2.06
   0  14  -1   23.50    2.33
   0  14  -1   24.92    2.33
   0  14  -1   23.25    2.37
   0  14  -1   18.18    2.03
   0  14   1   16.18    2.00
   0  14  -1   18.40    2.07
   0  14   1   20.44    1.90
   0  14  -1   17.47    1.95
   0  14  -1   18.94    1.77
   0  14   1   17.87    2.02
   0  14   1   19.29    2.36
   0  14  -1   19.44    2.20
   0  14   1   19.98    2.15
   0  14   1   21.66    2.20
   0  14   1   20.38    2.07
   0  14   1   15.11    2.07
   0  14  -1   19.76    2.15
  -2 -14  -1    8.85    1.99
   2 -14   1   10.45    1.71
  -2 -14  -1   10.03    1.77
   2 -14   1    9.50    1.44
   2 -14   1   10.54    1.41
   2 -14   1   10.24    1.52
  -2 -14  -1   12.01    1.84
  -2 -14  -1   10.98    1.62
   2 -14   1   13.48    1.65
  -2 -14  -1    9.30    1.26
   2 -14   1    8.64    1.36
   2 -14   1   15.46    1.71
   2 -14   1    8.54    1.54
  -2 -14  -1    9.93    1.36
   2 -14   1    8.04    1.66
  -2 -14  -1    9.61    1.54
  -2 -14  -1    8.53    1.49
  -2 -14  -1   11.56    1.88
  -2  14  -1   12.01    1.61
  -2  14  -1    8.46    1.03
   2  14   1   13.17    1.71
  -2  14  -1   14.15    1.64
  -2  14  -1    8.29    1.76
   2  14   1   13.57    1.54
  -2  14  -1   13.35    1.77
  -2  14  -1   14.61    1.90
   2  14   1    9.70    1.33
  -2  14  -1    9.47    1.29
   2  14   1   10.43    1.23
  -2  14  -1    8.07    1.43
   2  14   1   11.59    1.35
  -2  14  -1   10.75    1.25
   2  14   1   11.23    1.30
   2  14   1   10.61    1.43
  -2  14  -1    9.52    1.44
   2  14   1   11.17    1.77
   2  14   1   12.19    1.75
   4 -14   1   15.59    1.91
   4 -14   1   12.90    1.91
  -4 -14  -1   17.35    1.91
  -4 -14  -1   14.38    2.29
  -4 -14  -1   13.61    1.88
  -4 -14  -1   14.50    1.91
   4 -14   1   16.70    2.03
  -4 -14  -1   16.54    2.02
   4 -14   1   19.30    1.87
   4 -14   1   18.09    2.39
  -4 -14  -1   14.34    1.81
   4 -14   1   14.91    2.10
   4 -14   1   16.65    2.03
   4 -14   1   14.67    2.15
  -4 -14  -1   12.63    2.09
  -4 -14  -1   19.01    2.35
   4 -14   1   14.95    1.91
  -4 -14  -1   20.17    2.03
  -4  14  -1   19.39    2.29
  -4  14  -1   16.99    2.11
   4  14   1   14.58    1.70
  -4  14  -1   13.71    1.97
   4  14   1   14.86    1.82
  -4  14  -1   17.79    1.89
  -4  14  -1   17.42    1.56
  -4  14  -1   23.71    2.41
   4  14   1   19.65    1.93
   4  14   1   16.36    1.91
   4  14   1   15.33    2.36
   4  14   1   14.07    2.03
  -4  14  -1   13.52    1.72
  -4  14  -1   15.95    1.95
   4  14   1   20.55    2.15
  -4  14  -1   20.54    2.37
   4  14   1   20.76    2.19
   4  14   1   13.28    2.04
   6 -14   1    2.93    1.40
   6 -14   1   -1.13    1.61
  -6 -14  -1    2.60    1.56
   6 -14   1    1.82    1.26
  -6 -14  -1    5.31    2.32
   6 -14   1    1.34    2.01
  -6 -14  -1    2.26    1.39
   6 -14   1    3.01    1.37
  -6 -14  -1    2.26    2.00
  -6 -14  -1    3.20    1.29
   6 -14   1    1.34    1.44
   6 -14   1    1.55    1.10
   6 -14   1    3.20    1.98
  -6 -14  -1    1.44    1.57
  -6 -14  -1    1.16    1.34
  -6 -14  -1    2.83    2.21
  -6 -14  -1    2.45    1.52
   6 -14   1    4.04    1.40
  -6 -14  -1    2.84    0.95
  -6  14  -1    2.63    1.63
  -6  14  -1    1.80    1.28
  -6  14  -1    6.34    1.98
  -6  14  -1    3.96    2.16
   6  14   1    2.98    1.32
   6  14   1    3.14    1.07
  -6  14  -1    2.46    0.74
  -6  14  -1    2.72    1.10
   6  14   1    3.73    1.70
  -6  14  -1    2.12    1.40
  -6  14  -1    2.38    1.84
   6  14   1    1.95    0.86
   6  14   1    4.79    1.99
   6  14   1    1.71    1.83
  -6  14  -1    3.68    1.14
   6  14   1    3.54    1.60
   6  14   1    1.58    1.07
   8 -14   1    0.87    1.38
  -8 -14  -1    1.61    1.63
   8 -14   1   -0.15    1.16
  -8 -14  -1    3.30    1.49
  -8 -14  -1    1.15    1.65
  -8 -14  -1    0.41    1.09
  -8 -14  -1    1.42    2.02
   8 -14   1   -1.22    1.74
  -8 -14  -1    2.15    2.51
   8 -14   1    3.11    1.72
  -8 -14  -1    2.28    1.81
   8 -14   1    3.28    1.92
   8 -14   1    1.91    1.70
   8 -14   1    3.18    1.99
   8 -14   1    1.32    1.54
  -8 -14  -1    1.26    2.47
  -8 -14  -1    0.77    2.59
   8 -14   1    1.62    2.09
  -8 -14  -1    2.39    1.38
   8 -14   1    1.43    1.42
   8  14   1    2.69    1.23
   8  14   1    0.80    2.04
  -8  14  -1    0.94    1.41
   8  14   1    1.26    0.94
   8  14   1    0.77    1.26
   8  14   1    2.12    2.20
  -8  14  -1    4.10    1.97
   8  14   1   -0.66    1.53
   8  14   1    1.03    1.79
   8  14   1    1.53    2.27
  -8  14  -1    3.86    1.21
  -8  14  -1    1.99    1.33
  -8  14  -1    3.98    1.72
  -8  14  -1    1.18    2.27
  -8  14  -1    0.96    2.29
  -8  14  -1    0.64    0.96
  10 -14   1   -1.24    2.30
  10 -14   1    0.02    1.99
  10 -14   1    0.52    2.07
 -10 -14  -1   -0.98    1.24
  10 -14   1    0.70    1.70
 -10 -14  -1    0.68    1.82
  10 -14   1    0.01    1.89
 -10 -14  -1   -2.46    2.03
 -10 -14  -1    0.60    1.64
  10 -14   1   -1.06    2.30
  10 -14   1   -1.38    3.11
 -10 -14  -1    0.05    2.53
  10 -14   1   -0.86    1.55
 -10 -14  -1    1.85    2.86
  10 -14   1   -1.13    2.52
 -10 -14  -1    0.93    2.19
  10 -14   1   -1.76    1.28
 -10 -14  -1   -0.75    1.81
 -10 -14  -1    1.91    3.33
  10  14   1   -0.11    2.95
  10  14   1   -0.99    1.47
  10  14   1   -0.31    1.38
 -10  14  -1    2.84    1.82
 -10  14  -1   -0.22    1.30
  10  14   1   -0.06    2.13
 -10  14  -1   -1.77    1.58
  10  14   1    1.83    2.56
  10  14   1    0.23    1.07
 -10  14  -1   -0.29    1.25
 -10  14  -1   -1.05    1.76
  10  14   1   -1.63    1.86
 -10  14  -1    1.00    2.99
   9 -15  -1   14.71    3.33
   9 -15  -1   15.22    2.58
   9 -15  -1   17.32    2.80
   9 -15  -1   16.58    2.29
  -9 -15   1   17.04    2.29
   9 -15  -1   19.10    1.84
   9 -15  -1   18.43    2.63
  -9 -15   1   18.61    3.18
  -9 -15   1   14.78    2.24
  -9 -15   1   16.61    2.52
  -9 -15   1   15.39    2.12
  -9 -15   1   13.58    2.92
  -9 -15   1   13.44    3.44
  -9 -15   1   18.32    2.33
   9 -15  -1   15.15    2.40
  -9 -15   1   19.34    2.99
  -9 -15   1   18.36    3.32
   9 -15  -1   17.22    1.93
   9 -15  -1   20.44    3.02
   9  15  -1   13.80    2.50
  -9  15   1   13.40    2.53
  -9  15   1   19.48    2.29
   9  15  -1   11.47    2.08
   9  15  -1   11.49    1.74
  -9  15   1   17.26    4.77
   9  15  -1   21.72    3.10
  -9  15   1   20.98    2.00
  -9  15   1   18.55    2.83
   9  15  -1   17.13    2.33
  -9  15   1   20.44    2.16
  -9  15   1   11.61    2.27
   9  15  -1   15.66    1.90
  -7 -15   1   16.10    2.29
   7 -15  -1   18.05    2.79
  -7 -15   1   16.01    2.34
   7 -15  -1   29.59    2.76
   7 -15  -1   17.06    2.47
   7 -15  -1   26.92    3.10
  -7 -15   1   19.70    2.85
   7 -15  -1   17.69    2.52
  -7 -15   1   19.06    2.22
  -7 -15   1   16.31    3.03
  -7 -15   1   15.38    3.02
  -7 -15   1   13.51    2.80
   7 -15  -1   27.29    2.76
  -7 -15   1   10.84    3.20
   7 -15  -1   20.33    2.22
   7 -15  -1   29.91    2.56
   7 -15  -1   21.28    2.20
  -7 -15   1   19.32    2.45
   7  15  -1   18.73    2.02
   7  15  -1   20.15    2.20
  -7  15   1   16.90    2.14
  -7  15   1   21.64    2.31
  -7  15   1   22.37    2.36
   7  15  -1   25.05    2.39
  -7  15   1   16.27    2.23
   7  15  -1   14.44    1.89
   7  15  -1   18.09    2.75
  -7  15   1   24.43    2.70
   7  15  -1   22.95    2.52
  -7  15   1   20.17    2.02
  -7  15   1   17.61    2.88
   7  15  -1   21.70    2.90
   5 -15  -1    1.50    1.57
   5 -15  -1   -0.68    1.17
   5 -15  -1    1.75    1.76
  -5 -15   1   -0.35    1.80
  -5 -15   1    1.91    1.54
  -5 -15   1   -0.17    1.49
  -5 -15   1   -0.13    1.99
  -5 -15   1   -1.21    1.06
   5 -15  -1    0.57    1.55
   5 -15  -1    0.00    2.08
   5 -15  -1    0.54    1.50
  -5 -15   1    0.54    1.37
   5 -15  -1    1.20    0.97
   5 -15  -1    0.65    1.89
  -5 -15   1    0.27    1.35
  -5 -15   1   -0.54    2.22
  -5  15   1    0.11    1.38
   5  15  -1   -1.31    1.90
   5  15  -1   -0.28    0.71
   5  15  -1   -1.07    2.14
  -5  15   1    0.32    1.38
  -5  15   1    2.00    2.14
  -5  15   1   -0.57    1.87
  -5  15   1   -0.90    1.03
  -5  15   1    0.70    1.99
   5  15  -1   -0.02    1.16
  -5  15   1    1.70    1.23
  -5  15   1    0.29    0.73
   5  15  -1   -0.74    1.51
   5  15  -1   -0.53    0.52
   5  15  -1    0.35    0.84
   5  15  -1   -0.16    1.50
  -3 -15   1    0.88    1.92
  -3 -15   1    3.25    1.34
   3 -15  -1    1.74    0.95
   3 -15  -1    3.04    2.03
   3 -15  -1    1.14    1.73
   3 -15  -1    1.46    1.39
   3 -15  -1    1.63    1.61
  -3 -15   1    4.31    2.00
   3 -15  -1    2.11    1.82
  -3 -15   1    3.57    2.02
   3 -15  -1    0.86    1.10
  -3 -15   1    5.26    1.26
  -3 -15   1    2.25    1.16
  -3 -15   1    1.84    1.66
  -3 -15   1    2.50    1.36
   3 -15  -1    1.68    1.44
   3  15  -1    2.43    0.50
  -3  15   1    3.43    1.76
   3  15  -1    1.43    1.11
   3  15  -1    2.45    1.41
  -3  15   1    3.26    1.69
   3  15  -1    2.51    1.77
  -3  15   1    1.69    1.60
  -3  15   1    1.35    1.47
   3  15  -1    2.81    1.52
   3  15  -1    1.82    1.76
  -3  15   1    2.66    1.67
  -3  15   1    1.87    1.43
  -3  15   1    2.65    0.77
  -3  15   1    3.17    1.31
   3  15  -1    2.68    0.91
   3  15  -1    1.87    0.47
   3  15  -1    0.45    1.30
   3  15  -1    2.37    1.68
   1 -15  -1    0.33    1.53
  -1 -15   1    1.35    1.20
   1 -15  -1    1.79    0.94
   1 -15  -1    1.90    1.19
  -1 -15   1    2.95    1.61
  -1 -15   1   -0.24    1.24
  -1 -15   1    0.80    1.20
   1 -15  -1    1.42    1.73
   1 -15  -1    1.74    1.02
  -1 -15   1    1.23    1.54
  -1 -15   1   -0.08    1.59
   1 -15  -1    0.64    1.88
   1 -15  -1    0.44    1.24
   1 -15  -1    0.61    1.36
  -1 -15   1    1.05    1.96
   1 -15  -1    0.48    1.73
  -1 -15   1    1.54    1.03
  -1 -15   1    1.72    1.32
   1  15  -1    0.13    1.70
   1  15  -1    1.37    0.92
  -1  15   1    0.06    1.53
   1  15  -1    1.32    0.38
   1  15  -1    0.80    1.69
   1  15  -1    0.36    1.49
   1  15  -1    2.39    1.65
  -1  15   1    3.63    1.37
  -1  15   1    3.83    1.71
  -1  15   1    0.62    0.84
   1  15  -1    0.57    2.12
   1  15  -1    1.10    0.48
  -1  15   1    2.02    0.71
  -1  15   1    3.42    1.83
  -1  15   1    2.23    1.45
   1  15  -1    2.50    1.27
  -1  15   1    2.90    0.98
   1  15  -1    2.09    1.06
  -1  15   1    2.02    1.53
  -1  15   1    1.99    1.16
  -1  15   1    0.42    1.21
   1  15  -1    0.65    1.34
  -1 -15  -1    3.94    1.83
  -1 -15  -1    1.10    1.33
  -1 -15  -1    1.04    1.17
   1 -15   1    3.65    1.17
  -1 -15  -1    3.72    1.18
   1 -15   1    3.34    1.91
  -1 -15  -1    3.03    1.44
  -1 -15  -1    3.36    1.62
   1 -15   1    3.40    1.28
  -1 -15  -1    3.81    1.00
  -1 -15  -1    1.78    1.78
   1 -15   1    3.90    1.65
   1 -15   1    1.66    1.56
   1 -15   1    0.78    1.47
   1 -15   1    0.97    1.12
   1 -15   1    1.39    1.19
   1 -15   1    1.85    1.29
  -1 -15  -1    2.21    2.00
  -1  15  -1    3.00    1.53
  -1  15  -1    0.98    1.10
   1  15   1    2.33    0.87
   1  15   1    0.53    1.53
  -1  15  -1    1.78    1.72
  -1  15  -1    2.53    1.30
  -1  15  -1    1.50    0.45
   1  15   1    1.87    0.99
  -1  15  -1    1.45    1.34
   1  15   1    3.03    1.55
   1  15   1    1.63    1.70
  -1  15  -1    2.94    0.75
   1  15   1    2.29    1.07
  -1  15  -1    2.16    0.92
   1  15   1    2.35    1.44
  -1  15  -1    2.38    1.25
   1  15   1    2.68    0.87
   1  15   1    3.02    1.49
  -1  15  -1    1.83    1.69
   1  15   1    3.50    1.29
   1  15   1    3.79    1.82
   3 -15   1    4.45    1.65
  -3 -15  -1    5.68    1.43
  -3 -15  -1    1.39    1.00
   3 -15   1    3.27    1.26
   3 -15   1    4.35    1.66
  -3 -15  -1    1.05    1.74
  -3 -15  -1    3.23    1.55
  -3 -15  -1    5.25    2.19
  -3 -15  -1    5.64    1.35
  -3 -15  -1    3.25    1.62
   3 -15   1    3.77    1.32
   3 -15   1    4.39    1.48
   3 -15   1    2.90    1.15
   3 -15   1    2.58    1.42
  -3 -15  -1    6.98    1.99
  -3 -15  -1    4.89    1.94
   3 -15   1    4.42    1.69
  -3  15  -1    6.27    1.39
   3  15   1    4.92    1.04
   3  15   1    4.05    1.64
  -3  15  -1    4.63    1.98
   3  15   1    4.00    0.98
   3  15   1    3.83    1.04
   3  15   1    2.90    1.59
  -3  15  -1    4.93    1.81
  -3  15  -1    4.52    0.68
  -3  15  -1    5.46    1.53
   3  15   1    1.15    1.10
   3  15   1    5.56    1.83
  -3  15  -1    5.07    1.14
  -3  15  -1    3.65    1.34
  -3  15  -1    6.77    1.72
   3  15   1    5.13    1.30
  -3  15  -1    4.14    1.58
  -3  15  -1    3.00    1.18
   3  15   1    4.69    1.42
   3  15   1    3.12    1.84
   5 -15   1   11.10    2.17
  -5 -15  -1   12.60    2.42
  -5 -15  -1   11.33    1.42
  -5 -15  -1   11.14    2.25
  -5 -15  -1    9.46    2.61
  -5 -15  -1    7.09    1.94
   5 -15   1   11.53    2.49
  -5 -15  -1   13.49    2.12
   5 -15   1   10.83    1.82
   5 -15   1    7.49    1.70
   5 -15   1   12.18    1.71
   5 -15   1   14.35    2.18
  -5 -15  -1   12.32    1.88
  -5 -15  -1    8.50    1.79
   5 -15   1    8.42    1.65
  -5 -15  -1    7.90    2.42
   5 -15   1    9.06    1.87
  -5  15  -1    7.86    1.54
   5  15   1    9.62    2.40
  -5  15  -1   20.54    2.42
   5  15   1    7.55    1.75
   5  15   1   13.79    2.26
  -5  15  -1   10.06    2.25
  -5  15  -1   11.97    1.61
  -5  15  -1   10.27    1.26
  -5  15  -1   11.12    1.69
   5  15   1   11.03    1.46
   5  15   1    9.14    2.29
  -5  15  -1   12.95    1.88
   5  15   1   12.24    1.38
  -5  15  -1   15.42    2.35
   5  15   1    9.08    1.52
   5  15   1    9.79    1.69
   7 -15   1    7.15    1.74
   7 -15   1    6.49    2.33
  -7 -15  -1    8.17    1.37
   7 -15   1    6.85    1.74
  -7 -15  -1    8.87    2.68
  -7 -15  -1    5.37    2.62
   7 -15   1    4.09    1.62
  -7 -15  -1    5.86    1.79
  -7 -15  -1    7.37    2.32
  -7 -15  -1    8.94    1.82
   7 -15   1    9.09    1.97
   7 -15   1    6.92    2.16
  -7 -15  -1    4.52    2.06
   7 -15   1    7.90    1.94
  -7 -15  -1    5.40    2.63
   7 -15   1   12.28    1.57
  -7 -15  -1    5.68    1.99
  -7  15  -1   10.08    2.53
   7  15   1    7.83    1.49
   7  15   1    8.64    1.83
  -7  15  -1    8.55    1.76
  -7  15  -1    6.65    1.84
   7  15   1    7.87    2.59
  -7  15  -1    8.66    2.64
   7  15   1    3.41    2.08
  -7  15  -1    7.87    1.17
   7  15   1    7.05    2.04
   7  15   1    9.95    1.30
  -7  15  -1    7.52    1.52
  -7  15  -1    9.30    1.52
   7  15   1    6.71    1.46
   8 -16  -1   -0.03    3.18
  -8 -16   1   -0.75    1.73
  -8 -16   1    1.02    2.95
  -8 -16   1    1.40    1.64
  -8 -16   1    1.97    2.56
   8 -16  -1    0.25    1.29
  -8 -16   1   -1.93    3.17
   8 -16  -1   -0.89    2.22
  -8 -16   1    1.73    4.48
   8 -16  -1    0.03    1.20
  -8 -16   1    1.13    2.64
   8 -16  -1   -1.00    3.29
   8 -16  -1    0.64    1.71
  -8 -16   1    2.81    2.18
  -8 -16   1   -0.06    1.88
   8 -16  -1   -1.24    2.04
   8 -16  -1    0.46    2.07
   8 -16  -1   -0.29    2.11
  -8  16   1   -0.28    2.06
   8  16  -1   -0.21    0.91
   8  16  -1    0.35    1.90
   8  16  -1   -0.85    2.73
  -8  16   1   -2.73    2.82
   8  16  -1    3.45    2.01
   8  16  -1    2.34    1.58
  -8  16   1    2.21    1.95
  -8  16   1    0.49    1.09
  -8  16   1   -0.80    3.10
  -8  16   1    1.59    1.44
   8  16  -1    0.16    1.03
  -8  16   1    0.19    1.80
   6 -16  -1   -1.14    1.83
   6 -16  -1   -0.94    2.02
  -6 -16   1   -0.17    1.60
   6 -16  -1   -1.89    2.31
  -6 -16   1    0.79    2.19
  -6 -16   1   -0.43    2.26
   6 -16  -1   -0.27    1.85
   6 -16  -1    0.08    1.16
   6 -16  -1   -1.07    1.99
   6 -16  -1   -0.54    1.16
  -6 -16   1   -0.97    2.44
  -6 -16   1    0.91    2.62
   6 -16  -1   -0.67    1.81
  -6 -16   1   -1.08    1.35
   6 -16  -1    1.24    1.52
  -6 -16   1    1.53    1.94
  -6 -16   1   -4.32    2.54
  -6 -16   1   -0.31    1.62
   6  16  -1    0.72    1.36
  -6  16   1   -0.84    1.68
  -6  16   1   -0.49    1.63
   6  16  -1    0.11    0.82
   6  16  -1    0.21    1.64
   6  16  -1    0.48    2.33
   6  16  -1   -0.07    0.69
  -6  16   1   -1.03    2.51
   6  16  -1    0.05    2.20
  -6  16   1    1.05    1.85
  -6  16   1   -0.33    0.90
  -6  16   1    0.39    1.21
  -6  16   1    0.70    2.70
   6  16  -1   -0.09    1.01
   6  16  -1    1.22    1.77
   4 -16  -1    3.59    1.72
   4 -16  -1    4.11    1.65
   4 -16  -1    1.97    1.71
  -4 -16   1    2.04    1.71
  -4 -16   1    0.00    2.44
   4 -16  -1    4.26    1.99
   4 -16  -1    2.58    2.18
  -4 -16   1    3.35    2.18
  -4 -16   1    1.87    2.20
   4 -16  -1    1.75    1.42
   4 -16  -1    4.93    1.18
  -4 -16   1    1.43    1.48
  -4 -16   1    0.24    1.54
  -4 -16   1    5.64    1.73
  -4 -16   1    2.51    1.36
  -4 -16   1    1.43    1.79
   4 -16  -1    0.19    2.36
  -4  16   1    1.98    2.36
  -4  16   1    2.75    1.58
  -4  16   1    3.68    1.77
  -4  16   1    4.42    1.20
  -4  16   1    0.56    2.16
   4  16  -1    4.82    2.11
   4  16  -1    3.72    1.57
   4  16  -1    3.75    1.47
   4  16  -1    0.62    1.28
  -4  16   1    1.28    1.66
   4  16  -1    1.25    1.00
  -4  16   1    3.12    1.79
   4  16  -1    2.79    0.62
  -4  16   1    1.97    2.13
  -4  16   1    2.38    0.81
   4  16  -1    2.11    0.53
   4  16  -1    0.55    2.13
   2 -16  -1    0.80    1.61
   2 -16  -1   -0.40    2.03
   2 -16  -1    0.27    1.16
   2 -16  -1    1.29    1.22
  -2 -16   1    0.95    1.15
  -2 -16   1    1.27    1.46
  -2 -16   1    0.42    1.44
   2 -16  -1    3.25    1.46
   2 -16  -1    1.56    1.51
   2 -16  -1    0.38    1.74
  -2 -16   1    1.86    1.65
  -2 -16   1    0.22    2.29
  -2 -16   1    0.34    1.49
   2 -16  -1    0.47    1.78
  -2 -16   1    2.51    1.95
  -2 -16   1    0.50    1.98
  -2 -16   1    2.39    1.89
  -2  16   1    1.72    2.22
  -2  16   1    1.91    1.45
   2  16  -1    0.94    1.62
   2  16  -1    0.60    1.61
   2  16  -1    1.10    0.37
  -2  16   1    3.21    2.15
   2  16  -1    3.16    1.94
  -2  16   1    2.72    1.67
   2  16  -1    0.08    1.98
  -2  16   1    1.67    1.09
   2  16  -1    0.84    1.26
  -2  16   1    2.41    1.06
   2  16  -1    1.10    1.67
   2  16  -1    0.96    0.43
  -2  16   1    1.80    0.78
  -2  16   1    1.36    1.65
  -2  16   1    1.16    2.01
   0 -16   1   20.29    2.83
   0 -16   1   23.65    2.68
   0 -16   1   22.11    3.06
   0 -16  -1   13.22    2.44
   0 -16  -1   20.61    2.77
   0 -16  -1   23.72    2.40
   0 -16   1   24.86    2.56
   0 -16   1   19.30    2.53
   0 -16   1   26.34    2.76
   0 -16   1   20.56    2.40
   0 -16  -1   21.10    3.10
   0 -16  -1   21.84    2.63
   0 -16  -1   21.24    2.62
   0 -16  -1   21.94    2.90
   0 -16   1   17.74    2.35
   0 -16  -1   25.28    2.60
   0  16   1   21.39    2.15
   0  16  -1   21.55    1.92
   0  16  -1   20.45    3.03
   0  16   1   21.60    2.63
   0  16  -1   22.30    1.99
   0  16  -1   22.00    2.59
   0  16   1   20.41    2.45
   0  16   1   26.41    2.45
   0  16   1   19.20    2.70
   0  16  -1   24.42    2.34
   0  16   1   23.84    2.47
   0  16  -1   26.78    2.97
   0  16  -1   28.33    2.92
   0  16   1   24.50    2.29
   0  16  -1   24.46    2.61
   0  16  -1   22.20    2.72
   0  16   1   24.00    2.86
   0  16  -1   20.86    2.33
   0  16   1   25.84    2.63
   0  16   1   31.36    2.74
  -2 -16  -1    6.15    1.41
  -2 -16  -1    3.17    2.33
   2 -16   1    8.36    2.02
  -2 -16  -1    3.24    1.93
   2 -16   1    5.68    1.97
   2 -16   1    7.87    2.46
  -2 -16  -1    3.81    2.50
  -2 -16  -1    4.95    1.75
   2 -16   1    4.12    1.59
  -2 -16  -1    3.40    1.52
  -2 -16  -1    2.79    1.60
  -2 -16  -1    2.90    1.17
   2 -16   1    5.11    1.73
   2 -16   1    1.76    1.45
   2 -16   1    3.75    1.44
  -2  16  -1    6.39    2.06
  -2  16  -1    5.63    1.79
  -2  16  -1    4.28    0.67
   2  16   1    3.61    1.19
  -2  16  -1    1.69    2.25
  -2  16  -1    7.03    1.72
   2  16   1    4.87    1.56
   2  16   1    6.00    2.27
   2  16   1    5.64    1.79
   2  16   1    5.55    1.26
   2  16   1    3.20    2.07
  -2  16  -1    3.87    1.50
  -2  16  -1    1.98    2.16
  -2  16  -1    3.62    1.18
   2  16   1    6.75    1.08
  -2  16  -1    6.01    1.02
   2  16   1    3.16    1.11
  -4 -16  -1    0.70    1.09
   4 -16   1    0.09    1.69
  -4 -16  -1   -0.07    1.81
  -4 -16  -1    0.06    1.69
  -4 -16  -1    3.60    2.52
  -4 -16  -1    2.31    1.65
   4 -16   1    0.79    1.52
   4 -16   1    0.12    2.06
  -4 -16  -1    2.19    2.71
  -4 -16  -1    0.82    1.58
  -4 -16  -1    1.72    1.57
   4 -16   1    2.30    1.46
   4 -16   1    0.71    1.35
   4 -16   1   -0.72    2.86
   4 -16   1    1.13    1.62
   4  16   1    2.15    2.26
  -4  16  -1    0.12    2.15
  -4  16  -1    0.21    0.72
  -4  16  -1   -0.40    1.52
   4  16   1    0.23    0.96
   4  16   1   -2.28    2.28
  -4  16  -1    0.76    1.66
  -4  16  -1   -1.23    2.30
   4  16   1    0.89    1.09
  -4  16  -1    0.28    1.39
  -4  16  -1    0.55    1.22
   4  16   1    0.07    1.19
   4  16   1    0.38    1.81
   4  16   1    0.97    1.09
   4  16   1    1.19    1.54
  -4  16  -1    0.58    1.49
   6 -16   1    5.78    1.98
  -6 -16  -1    5.06    2.91
  -6 -16  -1    9.84    2.58
   6 -16   1    8.27    1.92
  -6 -16  -1    4.75    1.81
   6 -16   1    6.92    1.73
   6 -16   1    6.74    2.51
   6 -16   1    5.32    2.95
   6 -16   1    5.43    1.74
   6 -16   1    8.77    1.54
  -6 -16  -1    5.51    2.18
   6 -16   1    5.55    1.88
  -6 -16  -1    7.28    2.18
  -6 -16  -1    6.01    3.17
  -6 -16  -1    6.19    1.30
   6 -16   1    9.25    2.23
  -6 -16  -1    5.60    1.90
   6  16   1    6.15    1.37
  -6  16  -1    7.31    1.63
  -6  16  -1    5.11    3.04
   6  16   1    7.24    1.59
   6  16   1    6.84    2.82
  -6  16  -1    7.15    1.69
  -6  16  -1    5.44    1.06
   6  16   1    6.14    1.26
  -6  16  -1    5.70    1.79
   6  16   1    6.93    1.89
  -6  16  -1    9.33    1.62
   6  16   1    8.27    2.20
  -5 -17   1   11.68    2.22
  -5 -17   1   18.82    3.15
   5 -17  -1   13.12    3.09
   5 -17  -1   11.30    2.42
   5 -17  -1   10.57    2.37
   5 -17  -1   15.49    2.45
  -5 -17   1    8.01    2.17
   5 -17  -1   18.54    2.74
  -5 -17   1   11.31    1.97
   5 -17  -1   12.71    2.10
   5 -17  -1   17.25    1.85
   5 -17  -1   17.96    3.44
  -5 -17   1   12.83    3.45
  -5 -17   1   12.47    2.83
  -5 -17   1   11.30    2.40
   5  17  -1   13.94    1.42
   5  17  -1   15.39    2.04
  -5  17   1   13.32    2.51
   5  17  -1   15.81    1.78
  -5  17   1   14.72    2.55
  -5  17   1   13.79    1.69
  -5  17   1   15.25    1.89
  -5  17   1   19.12    3.43
  -5  17   1   14.74    3.08
   5  17  -1   12.18    1.34
  -5  17   1   13.04    2.24
   5  17  -1   16.87    2.26
   5  17  -1   16.31    2.45
   3 -17  -1    0.83    1.82
  -3 -17   1    0.93    2.26
  -3 -17   1   -0.45    1.32
   3 -17  -1   -0.13    1.45
  -3 -17   1    0.36    1.72
  -3 -17   1    0.85    2.59
  -3 -17   1    0.01    1.89
   3 -17  -1   -1.07    1.31
  -3 -17   1    0.92    2.31
  -3 -17   1   -0.43    2.87
   3 -17  -1   -1.48    1.91
   3 -17  -1    1.26    1.71
   3 -17  -1   -0.71    2.28
   3 -17  -1   -2.67    2.47
   3 -17  -1    0.56    2.72
  -3  17   1    0.77    1.23
  -3  17   1    0.85    1.72
   3  17  -1    0.07    0.34
  -3  17   1    0.02    0.84
   3  17  -1    0.60    1.19
  -3  17   1    0.31    1.92
  -3  17   1    0.71    3.21
   3  17  -1   -0.95    1.90
   3  17  -1   -2.32    2.37
  -3  17   1   -0.40    2.73
  -3  17   1    0.60    1.73
   3  17  -1    1.67    2.48
   3  17  -1   -0.93    1.83
   3  17  -1   -1.83    1.45
  -1 -17   1    9.86    2.07
   1 -17  -1   18.17    2.95
  -1 -17   1   11.39    2.76
   1 -17  -1   21.07    3.21
  -1 -17   1   15.38    3.23
  -1 -17   1   13.98    2.32
   1 -17  -1   14.60    1.93
   1 -17  -1   16.07    2.01
  -1 -17   1   13.88    2.20
   1 -17  -1   11.62    2.31
   1 -17  -1   14.02    2.30
  -1 -17   1   13.37    2.24
  -1 -17   1   12.37    2.56
   1 -17  -1   18.90    2.57
   1 -17  -1   10.32    2.19
  -1  17   1   19.25    2.71
   1  17  -1   18.76    2.69
   1  17  -1   18.81    2.26
  -1  17   1   15.11    1.84
  -1  17   1   18.06    2.21
   1  17  -1   19.98    2.11
  -1  17   1   10.32    2.38
   1  17  -1   15.49    2.30
   1  17  -1   22.84    2.11
  -1  17   1   12.94    2.97
   1  17  -1   12.92    2.86
  -1  17   1   16.59    1.72
  -1  17   1   18.79    2.84
   1 -17   1    1.39    2.06
   1 -17   1    0.28    1.65
  -1 -17  -1    0.15    1.16
  -1 -17  -1    2.56    2.83
  -1 -17  -1   -0.16    1.51
  -1 -17  -1    1.92    1.64
   1 -17   1    0.80    1.77
   1 -17   1    0.81    1.71
  -1 -17  -1    1.82    1.97
  -1 -17  -1    2.53    1.53
   1 -17   1    5.91    1.85
  -1 -17  -1    0.39    2.21
   1 -17   1    4.51    2.78
   1 -17   1   -1.71    2.31
   1 -17   1    0.03    1.42
  -1 -17  -1    1.24    2.48
   1  17   1    1.12    0.82
   1  17   1    1.49    1.12
   1  17   1   -0.28    2.58
  -1  17  -1    3.34    1.96
  -1  17  -1   -0.82    1.95
  -1  17  -1    2.61    2.40
  -1  17  -1    2.81    0.71
   1  17   1    4.07    2.62
  -1  17  -1    1.37    1.41
  -1  17  -1    3.19    1.84
  -1  17  -1    2.13    1.64
  -1  17  -1    1.24    0.45
  -1  17  -1    0.21    1.23
   1  17   1    1.19    1.90
   1  17   1    1.47    1.28
   1  17   1    0.73    1.47
   1  17   1    0.08    1.72
  -3 -17  -1    0.03    1.89
  -3 -17  -1   -1.35    3.02
   3 -17   1    1.41    1.84
   3 -17   1   -1.51    2.91
   3 -17   1   -0.25    1.63
   3 -17   1   -0.30    1.41
  -3 -17  -1    1.95    1.71
  -3 -17  -1   -0.52    1.27
  -3 -17  -1   -1.36    1.77
  -3 -17  -1    2.83    2.82
   3 -17   1    1.39    1.80
   3 -17   1   -0.65    2.39
  -3 -17  -1    1.19    2.40
  -3 -17  -1   -0.59    2.01
   3 -17   1   -0.19    1.71
  -3  17  -1   -0.33    1.82
   3  17   1    1.92    1.79
   3  17   1    0.24    2.02
  -3  17  -1   -0.33    0.64
   3  17   1    0.72    1.13
  -3  17  -1    1.57    2.59
   3  17   1    0.06    1.08
   3  17   1   -0.60    2.71
  -3  17  -1   -0.57    1.77
  -3  17  -1    0.14    1.14
   3  17   1    0.74    1.36
  -3  17  -1    1.06    1.73
   3  17   1    0.67    1.43
  -3  17  -1   -0.97    1.28
  -5 -17  -1   -0.36    1.30
   5 -17   1   -0.85    1.67
  -5 -17  -1   -0.73    1.99
   5 -17   1    1.26    1.96
   5 -17   1    1.27    2.73
  -5 -17  -1   -0.56    2.53
   5 -17   1   -0.23    2.33
   5 -17   1    0.04    3.15
   5 -17   1   -0.61    1.85
  -5 -17  -1   -0.06    2.54
  -5 -17  -1    1.22    1.96
  -5 -17  -1   -0.02    3.37
  -5 -17  -1    0.42    2.19
   5 -17   1   -0.27    2.41
  -5  17  -1    0.85    1.80
  -5  17  -1    0.27    1.95
   5  17   1    1.32    1.46
   5  17   1    0.18    1.23
   5  17   1   -0.53    1.24
  -5  17  -1   -1.33    2.90
  -5  17  -1   -0.21    0.84
   5  17   1    1.38    1.15
   5  17   1   -0.07    2.78
  -5  17  -1   -0.66    1.84
   5  17   1    0.65    1.84
   5  17   1    0.36    3.12
  -5  17  -1   -0.35    1.86
  -5  17  -1    0.12    1.52
   5  17   1   -1.57    2.12
   0 -18   1   -0.28    2.94
   0 -18   1   -0.49    1.82
   0 -18  -1    0.49    2.21
   0 -18  -1    1.42    1.82
   0 -18  -1    0.54    2.49
   0 -18  -1    2.22    5.44
   0 -18   1   -1.04    3.33
   0 -18   1    0.05    1.63
   0 -18  -1    0.35    3.42
   0 -18  -1   -1.11    1.72
   0 -18   1    0.60    2.05
   0 -18  -1   -0.23    1.52
   0 -18  -1    1.60    2.08
   0 -18   1   -1.52    2.03
   0 -18   1   -1.60    2.38
   0 -18   1   -0.31    1.98
   0  18   1    0.36    1.52
   0  18   1   -0.69    3.11
   0  18   1    1.01    2.16
   0  18   1    0.44    1.93
   0  18   1   -0.44    0.94
   0  18   1    0.19    2.66
   0  18   1   -0.85    2.85
   0  18  -1    0.34    1.35
   0  18  -1    0.13    2.04
   0  18  -1   -0.77    1.65
   0  18  -1   -0.13    1.90
   0  18   1   -0.36    1.30
   0  18  -1    1.98    2.92
 -16   0   2    2.71    2.47
 -16   0   2    1.10    1.86
 -16   0   2    1.10    1.39
 -16   0   2    1.94    2.21
  16   0  -2    1.20    0.62
 -16   0   2    1.25    1.49
 -16   0   2    1.21    1.91
 -16   0   2    1.30    1.06
 -16   0   2    0.81    2.14
  16   0  -2    2.73    1.61
 -16   0   2   -0.06    1.82
  16   0  -2    3.68    2.02
 -16   0   2    0.78    1.99
  16   0  -2    1.48    2.19
  16   0  -2    1.14    0.97
  16   0  -2    3.72    1.59
 -16   0   2    1.19    1.21
 -14   0   2   20.00    2.12
  14   0  -2   19.18    2.03
  14   0  -2   18.80    1.83
 -14   0   2   16.67    2.14
 -14   0   2   17.45    1.94
 -14   0   2   18.55    1.86
 -14   0   2   13.04    2.09
  14   0  -2   17.43    2.05
 -14   0   2   12.68    2.01
  14   0  -2   21.14    2.26
  14   0  -2   20.50    2.10
  14   0  -2   22.02    2.07
  14   0  -2   16.34    1.60
 -14   0   2   13.44    2.17
 -14   0   2   23.39    2.34
 -12   0   2   65.25    5.53
 -12   0   2   68.57    5.46
  12   0  -2   60.36    5.51
  12   0  -2   66.63    5.48
 -12   0   2   61.99    5.56
 -12   0   2   62.75    5.51
 -12   0   2   63.26    5.53
  12   0  -2   60.65    5.33
  12   0  -2   65.71    5.50
  12   0  -2   59.25    5.39
  12   0  -2   59.25    5.46
 -12   0   2   58.40    5.41
 -12   0   2   69.18    5.57
  12   0  -2   66.04    5.47
 -12   0   2   63.38    5.43
 -12   0   2   66.66    5.47
  12   0  -2   69.26    5.47
 -10   0   2   58.12    4.76
  10   0  -2   55.23    4.77
  10   0  -2   57.55    4.77
  10   0  -2   52.43    4.67
  10   0  -2   59.33    4.80
 -10   0   2   52.58    4.75
 -10   0   2   53.04    4.81
  10   0  -2   55.68    4.76
  10   0  -2   58.43    4.82
 -10   0   2   56.47    4.76
 -10   0   2   54.77    4.74
 -10   0   2   55.06    4.75
  10   0  -2   54.74    4.72
  10   0  -2   56.85    4.81
 -10   0   2   54.91    4.79
 -10   0   2   59.40    4.83
 -10   0   2   59.16    4.84
   8   0  -2   20.03    1.57
   8   0  -2   19.70    1.71
   8   0  -2   18.53    1.71
  -8   0   2   17.67    1.68
  -8   0   2   18.96    1.67
  -8   0   2   18.83    1.67
   8   0  -2   17.64    1.63
   8   0  -2   18.94    1.67
   8   0  -2   21.37    1.72
  -8   0   2   19.07    1.66
  -8   0   2   17.27    1.76
  -8   0   2   18.04    1.72
  -8   0   2   17.77    1.65
  -8   0   2   17.46    1.71
  -8   0   2   18.42    1.59
   8   0  -2   17.62    1.68
  -8   0   2   15.98    1.74
   6   0  -2   88.44    7.00
  -6   0   2   79.61    6.99
  -6   0   2   87.72    7.03
  -6   0   2   78.75    7.01
  -6   0   2   88.37    7.03
  -6   0   2   86.71    6.96
  -6   0   2   84.04    7.00
   6   0  -2   84.61    7.03
  -6   0   2   84.05    7.01
   6   0  -2   83.44    7.01
   6   0  -2   84.24    7.00
   6   0  -2   79.93    7.00
  -6   0   2   89.94    7.05
  -6   0   2   75.00    7.00
   6   0  -2   81.97    6.98
   6   0  -2   80.16    6.96
   6   0  -2   85.34    7.00
  -6   0   2   85.79    6.98
  -4   0   2   58.04    4.86
   4   0  -2   58.01    4.84
   4   0  -2   57.15    4.86
  -4   0   2   61.63    4.82
   4   0  -2   55.58    4.87
  -4   0   2   54.69    4.81
  -4   0   2   61.86    4.84
  -4   0   2   59.98    4.87
  -4   0   2   55.43    4.83
  -4   0   2   54.56    4.84
   4   0  -2   57.98    4.81
   4   0  -2   58.42    4.82
  -4   0   2   56.41    4.85
  -4   0   2   58.85    4.83
   4   0  -2   52.36    4.83
  -4   0   2   63.23    4.84
   4   0  -2   60.61    4.83
   4   0  -2   56.65    4.84
  -2   0   2    0.01    0.11
   2   0  -2   -0.03    0.09
  -2   0   2    0.32    0.14
  -2   0   2    0.33    0.11
  -2   0   2    0.25    0.24
   2   0  -2   -0.04    0.15
   2   0  -2    0.09    0.18
  -2   0   2    0.40    0.25
   2   0  -2    0.01    0.08
  -2   0   2    0.06    0.09
  -2   0   2   -0.41    0.19
   2   0  -2   -0.01    0.22
  -2   0   2    0.24    0.07
  -2   0   2   -0.04    0.16
  -2   0   2    0.17    0.09
   2   0  -2    0.01    0.10
   2   0  -2    0.09    0.07
   2   0  -2   -0.01    0.10
   0   0   2  600.90   50.42
   0   0   2  618.88   50.44
   0   0  -2  585.56   50.45
   0   0  -2  587.27   50.44
   0   0   2  604.68   50.44
   0   0   2  612.84   50.44
   0   0   2  612.11   50.45
   0   0   2  614.45   50.43
   0   0  -2  630.69   50.43
  -2   0  -2  178.13   14.88
   2   0   2  176.88   14.86
   2   0   2  179.30   14.88
   2   0   2  177.49   14.87
   2   0   2  179.66   14.88
   2   0   2  176.75   14.88
  -2   0  -2  178.66   14.87
  -2   0  -2  181.43   14.87
  -2   0  -2  179.47   14.88
  -2   0  -2  178.21   14.87
   2   0   2  181.17   14.89
   2   0   2  188.02   14.90
  -2   0  -2  172.38   14.87
   2   0   2  173.54   14.87
  -2   0  -2  173.53   14.88
  -2   0  -2  180.29   14.89
   2   0   2  178.42   14.87
  -4   0  -2   87.27    7.50
   4   0   2   90.37    7.50
   4   0   2   89.81    7.51
  -4   0  -2   85.84    7.50
   4   0   2   94.04    7.50
   4   0   2   86.53    7.49
   4   0   2   89.96    7.47
  -4   0  -2   93.70    7.48
  -4   0  -2   94.22    7.52
   4   0   2   87.96    7.48
  -4   0  -2   91.33    7.50
   4   0   2   87.29    7.50
   4   0   2   90.81    7.50
  -4   0  -2   89.20    7.50
  -4   0  -2   88.57    7.47
   4   0   2   88.99    7.49
  -6   0  -2   75.67    6.50
  -6   0  -2   72.34    6.48
   6   0   2   80.75    6.56
   6   0   2   86.76    6.55
  -6   0  -2   75.95    6.55
   6   0   2   71.60    6.54
  -6   0  -2   81.50    6.56
  -6   0  -2   80.15    6.55
   6   0   2   80.47    6.56
  -6   0  -2   75.69    6.56
  -6   0  -2   78.47    6.52
   6   0   2   77.31    6.53
   6   0   2   82.22    6.55
   6   0   2   79.88    6.51
   6   0   2   80.46    6.63
   6   0   2   75.41    6.56
  -6   0  -2   72.95    6.53
   8   0   2   77.39    6.63
   8   0   2   84.49    6.71
  -8   0  -2   78.35    6.70
   8   0   2   75.38    6.66
   8   0   2   81.73    6.72
   8   0   2   80.80    6.68
   8   0   2   72.50    6.66
[truncated: 1,458,053 more chars]
