# Supplementary material for: Multicolor Photochromism of Two-Component Diarylethene Crystals Containing Oxidized and Unoxidized Benzothiophene Groups
Source: MDPI journal article supplement (doi:10.3390/cryst12121730), 2022-11-29
Supplement: s1 [file s1 › 2_2a.cif]

data_global

_publ_requested_journal          Crystals

_publ_contact_author_name        'Masakazu Morimoto'
_publ_contact_author_address     
;Department of Chemistry, Rikkyo University
3-34-1 Nishi-Ikebukuro, Toshima-ku, Tokyo 171-8501, Japan
;
_publ_contact_author_email       m-morimoto@rikkyo.ac.jp
_publ_contact_author_phone       ?
_publ_contact_author_fax         ?
loop_
_publ_author_name
_publ_author_address
'Nishimura, Ryo'
;Department of Chemistry, Rikkyo University
3-34-1 Nishi-Ikebukuro, Toshima-ku, Tokyo 171-8501, Japan
;
'Nagakawa, Yurika'
;Department of Chemistry, Rikkyo University
3-34-1 Nishi-Ikebukuro, Toshima-ku, Tokyo 171-8501, Japan
;
'Morimoto, Masakazu'
;Department of Chemistry, Rikkyo University
3-34-1 Nishi-Ikebukuro, Toshima-ku, Tokyo 171-8501, Japan
;
_audit_creation_method           'APEX3 v2015.9-0'

_publ_section_title              
;
;
_publ_section_abstract           
;
;
_publ_section_references         
;
;
_publ_section_comment            
;
;

data_2a
_chemical_name_systematic               ?
_chemical_name_common                   ?
_chemical_formula_moiety                ?
_chemical_formula_sum                   'C25 H18 F6 O2 S2'
_chemical_formula_iupac                 ?
_chemical_formula_weight                528.51

_chemical_melting_point                 ?

_space_group_crystal_system             monoclinic
_space_group_name_H-M_alt               'P 1 21/c 1'
_space_group_name_Hall                  '-P 2ybc'
loop_
    _space_group_symop_operation_xyz
    'x, y, z'
    '-x, y+1/2, -z+1/2'
    '-x, -y, -z'
    'x, -y-1/2, z-1/2'

_cell_length_a                          13.1649(8)
_cell_length_b                          10.5410(6)
_cell_length_c                          16.5297(10)
_cell_angle_alpha                       90
_cell_angle_beta                        99.859(2)
_cell_angle_gamma                       90
_cell_volume                            2260.0(2)
_cell_formula_units_Z                   4
_cell_measurement_reflns_used           602
_cell_measurement_theta_min             2.3103
_cell_measurement_theta_max             29.0309
_cell_measurement_temperature           100.(2)

_exptl_crystal_description              block
_exptl_crystal_colour                   'colourless'
_exptl_crystal_size_max                 0.280
_exptl_crystal_size_mid                 0.196
_exptl_crystal_size_min                 0.090
_exptl_crystal_density_diffrn           1.553
_exptl_crystal_density_meas             ?
_exptl_crystal_density_method           'not measured'
_exptl_crystal_F_000                    1080

_exptl_absorpt_coefficient_mu           0.307
_exptl_absorpt_correction_type          multi-scan
_exptl_absorpt_process_details          'SADABS V2014/5 (Bruker AXS Inc.)'
_exptl_absorpt_correction_T_min         0.85
_exptl_absorpt_correction_T_max         0.97

_exptl_special_details                  
;
 The crystal was prepared by recrystallization from diethyl ether. 
; 

_diffrn_ambient_temperature             100.(2)

_diffrn_source                          ?
_diffrn_source_type                     ?

_diffrn_radiation_type                  'MoKa'
_diffrn_radiation_wavelength            0.71073
_diffrn_radiation_monochromator         ?

_diffrn_measurement_device_type         'Bruker D8 goniometer'
_diffrn_measurement_method              ?

_diffrn_detector_area_resol_mean        7.3910

_diffrn_reflns_number                   120802
_diffrn_reflns_av_R_equivalents         0.0652
_diffrn_reflns_av_unetI/netI            0.0181
_diffrn_reflns_theta_min                2.66
_diffrn_reflns_theta_max                25.12
_diffrn_reflns_theta_full               25.12
_diffrn_measured_fraction_theta_max     0.995
_diffrn_measured_fraction_theta_full    0.995
_diffrn_reflns_limit_h_min              -15
_diffrn_reflns_limit_h_max              15
_diffrn_reflns_limit_k_min              -12
_diffrn_reflns_limit_k_max              12
_diffrn_reflns_limit_l_min              -19
_diffrn_reflns_limit_l_max              19

_refine_special_details                 
;
;

_reflns_number_total                    4017
_reflns_number_gt                       3574
_reflns_threshold_expression            'I > 2\s(I)'

_refine_ls_structure_factor_coef        Fsqd
_refine_ls_matrix_type                  full
_refine_ls_R_factor_all                 0.0637
_refine_ls_R_factor_gt                  0.0571
_refine_ls_wR_factor_gt                 0.1236
_refine_ls_wR_factor_ref                0.1265
_refine_ls_goodness_of_fit_ref          1.237
_refine_ls_restrained_S_all             1.237
_refine_ls_number_reflns                4017
_refine_ls_number_parameters            318
_refine_ls_number_restraints            0
_refine_ls_number_constraints           ?
_refine_ls_hydrogen_treatment           constr
_refine_ls_weighting_scheme             calc
_refine_ls_weighting_details            
    'w=1/[\s^2^(Fo^2^)+(0.0077P)^2^+7.0621P] where P=(Fo^2^+2Fc^2^)/3'

_atom_sites_solution_hydrogens          geom
_atom_sites_solution_primary            ?
_atom_sites_solution_secondary          ?

_refine_ls_shift/su_max                 0.001
_refine_ls_shift/su_mean                0.000
_refine_diff_density_max                0.671
_refine_diff_density_min                -0.509
_refine_ls_extinction_method            none
_refine_ls_extinction_coef              ?

loop_
    _atom_type_symbol
    _atom_type_description
    _atom_type_scat_dispersion_real
    _atom_type_scat_dispersion_imag
    _atom_type_scat_source
    C C 0.0033 0.0016 'International Tables Vol C Tables 4.2.6.8 and 6.1.1.4'
    H H 0.0000 0.0000 'International Tables Vol C Tables 4.2.6.8 and 6.1.1.4'
    O O 0.0106 0.0060 'International Tables Vol C Tables 4.2.6.8 and 6.1.1.4'
    F F 0.0171 0.0103 'International Tables Vol C Tables 4.2.6.8 and 6.1.1.4'
    S S 0.1246 0.1234 'International Tables Vol C Tables 4.2.6.8 and 6.1.1.4'

_computing_data_collection              ?
_computing_cell_refinement              'APEX3 v2015.9-0 (Bruker AXS)'
_computing_data_reduction               'SAINT V8.35A (Bruker AXS Inc., 2015)'
_computing_structure_solution           ?
_computing_structure_refinement         'SHELXL-2014/7 (Sheldrick, 2014)'
_computing_molecular_graphics           ?
_computing_publication_material         ?

loop_
    _atom_site_type_symbol
    _atom_site_label
    _atom_site_fract_x
    _atom_site_fract_y
    _atom_site_fract_z
    _atom_site_U_iso_or_equiv
    _atom_site_adp_type
    _atom_site_calc_flag
    _atom_site_refinement_flags_adp
    _atom_site_refinement_flags_occupancy
    _atom_site_refinement_flags_posn
    _atom_site_occupancy
    _atom_site_disorder_assembly
    _atom_site_disorder_group
    C C1 0.7651(3) 0.5578(4) 1.0496(2) 0.0399(10) Uani d . . . 1 . .
    H H1A 0.6978 0.5419 1.0154 0.06 Uiso calc U . R 1 . .
    H H1B 0.7674 0.6449 1.0704 0.06 Uiso calc U . R 1 . .
    H H1C 0.7755 0.4983 1.0959 0.06 Uiso calc U . R 1 . .
    C C2 0.8503(3) 0.5392(4) 0.9982(2) 0.0330(9) Uani d . . . 1 . .
    H H2A 0.8427 0.6043 0.9544 0.04 Uiso calc U . R 1 . .
    H H2B 0.9181 0.5522 1.0336 0.04 Uiso calc U . R 1 . .
    C C3 0.8484(3) 0.4114(4) 0.9600(2) 0.0273(8) Uani d . . . 1 . .
    C C4 0.8352(3) 0.3751(3) 0.8810(2) 0.0223(7) Uani d . . . 1 . .
    C C5 0.8442(3) 0.2366(4) 0.8677(2) 0.0261(8) Uani d . . . 1 . .
    C C6 0.8315(3) 0.1687(4) 0.7946(2) 0.0281(8) Uani d . . . 1 . .
    H H6 0.8159 0.2113 0.7434 0.034 Uiso calc U . R 1 . .
    C C7 0.8421(3) 0.0372(4) 0.7976(3) 0.0331(9) Uani d . . . 1 . .
    H H7 0.8316 -0.0096 0.7478 0.04 Uiso calc U . R 1 . .
    C C8 0.8672(3) -0.0265(4) 0.8709(3) 0.0352(9) Uani d . . . 1 . .
    H H8 0.8769 -0.1158 0.8709 0.042 Uiso calc U . R 1 . .
    C C9 0.8786(3) 0.0385(4) 0.9447(3) 0.0352(9) Uani d . . . 1 . .
    H H9 0.8948 -0.0057 0.9954 0.042 Uiso calc U . R 1 . .
    C C10 0.8657(3) 0.1709(4) 0.9435(2) 0.0304(9) Uani d . . . 1 . .
    C C11 0.5725(3) 0.2000(4) 0.8364(3) 0.0344(9) Uani d . . . 1 . .
    H H11A 0.6266 0.2082 0.8848 0.052 Uiso calc U . R 1 . .
    H H11B 0.5832 0.1216 0.8071 0.052 Uiso calc U . R 1 . .
    H H11C 0.5049 0.1973 0.8536 0.052 Uiso calc U . R 1 . .
    C C12 0.5769(3) 0.3134(3) 0.7797(2) 0.0281(8) Uani d . . . 1 . .
    H H12A 0.6418 0.3087 0.7571 0.034 Uiso calc U . R 1 . .
    H H12B 0.519 0.3069 0.733 0.034 Uiso calc U . R 1 . .
    C C13 0.5718(3) 0.4391(3) 0.8195(2) 0.0232(8) Uani d . . . 1 . .
    C C14 0.6375(3) 0.5390(3) 0.82444(19) 0.0210(7) Uani d . . . 1 . .
    C C15 0.6042(3) 0.6474(3) 0.8670(2) 0.0221(7) Uani d . . . 1 . .
    C C16 0.6522(3) 0.7651(4) 0.8863(2) 0.0278(8) Uani d . . . 1 . .
    H H16 0.716 0.7835 0.8693 0.033 Uiso calc U . R 1 . .
    C C17 0.6069(3) 0.8535(4) 0.9297(2) 0.0343(9) Uani d . . . 1 . .
    H H17 0.6405 0.9321 0.944 0.041 Uiso calc U . R 1 . .
    C C18 0.5118(3) 0.8288(4) 0.9530(3) 0.0381(10) Uani d . . . 1 . .
    H H18 0.4802 0.8923 0.9811 0.046 Uiso calc U . R 1 . .
    C C19 0.4629(3) 0.7139(4) 0.9359(2) 0.0327(9) Uani d . . . 1 . .
    H H19 0.3989 0.6965 0.9528 0.039 Uiso calc U . R 1 . .
    C C20 0.5103(3) 0.6243(3) 0.8932(2) 0.0262(8) Uani d . . . 1 . .
    C C21 0.8165(3) 0.4662(3) 0.81177(19) 0.0208(7) Uani d . . . 1 . .
    C C22 0.8980(3) 0.4930(4) 0.7600(2) 0.0248(8) Uani d . . . 1 . .
    C C23 0.8606(3) 0.6135(4) 0.7125(2) 0.0283(8) Uani d . . . 1 . .
    C C24 0.7443(3) 0.6158(4) 0.7149(2) 0.0266(8) Uani d . . . 1 . .
    C C25 0.7331(3) 0.5382(3) 0.7888(2) 0.0215(7) Uani d . . . 1 . .
    F F1 0.90812(18) 0.3982(2) 0.70647(13) 0.0348(5) Uani d . . . 1 . .
    F F2 0.99197(16) 0.5073(2) 0.80730(13) 0.0340(5) Uani d . . . 1 . .
    F F3 0.88263(18) 0.6163(2) 0.63646(13) 0.0392(6) Uani d . . . 1 . .
    F F4 0.90493(18) 0.7156(2) 0.75288(14) 0.0363(5) Uani d . . . 1 . .
    F F5 0.69231(17) 0.5615(2) 0.64533(12) 0.0375(6) Uani d . . . 1 . .
    F F6 0.70859(18) 0.7357(2) 0.71584(14) 0.0369(6) Uani d . . . 1 . .
    O O1 0.9785(2) 0.2812(3) 1.06845(17) 0.0398(7) Uani d . . . 1 . .
    O O2 0.7931(2) 0.2538(3) 1.06963(18) 0.0451(8) Uani d . . . 1 . .
    S S1 0.87502(8) 0.27483(10) 1.02420(6) 0.0318(2) Uani d . . . 1 . .
    S S2 0.46541(7) 0.47249(9) 0.86579(6) 0.0289(2) Uani d . . . 1 . .

loop_
    _atom_site_aniso_label
    _atom_site_aniso_U_11
    _atom_site_aniso_U_22
    _atom_site_aniso_U_33
    _atom_site_aniso_U_12
    _atom_site_aniso_U_13
    _atom_site_aniso_U_23
    C1 0.050(3) 0.043(3) 0.029(2) 0.011(2) 0.0141(19) -0.0024(19)
    C2 0.041(2) 0.036(2) 0.0221(19) 0.0017(18) 0.0071(17) -0.0039(17)
    C3 0.0276(19) 0.033(2) 0.0209(18) 0.0031(16) 0.0041(15) 0.0047(16)
    C4 0.0223(18) 0.0251(18) 0.0215(17) 0.0019(14) 0.0095(14) -0.0001(14)
    C5 0.0194(17) 0.0284(19) 0.032(2) 0.0013(15) 0.0094(15) 0.0018(16)
    C6 0.031(2) 0.028(2) 0.0279(19) 0.0028(16) 0.0110(16) -0.0012(16)
    C7 0.031(2) 0.033(2) 0.037(2) -0.0020(17) 0.0123(17) -0.0046(18)
    C8 0.027(2) 0.028(2) 0.052(3) 0.0001(16) 0.0122(18) -0.0007(19)
    C9 0.0226(19) 0.039(2) 0.044(2) 0.0037(17) 0.0064(17) 0.0152(19)
    C10 0.0188(18) 0.030(2) 0.040(2) -0.0012(16) -0.0014(16) 0.0127(17)
    C11 0.039(2) 0.025(2) 0.042(2) -0.0016(17) 0.0149(18) -0.0005(18)
    C12 0.030(2) 0.0242(19) 0.031(2) -0.0021(16) 0.0085(16) -0.0043(16)
    C13 0.0258(18) 0.0284(19) 0.0167(17) 0.0012(15) 0.0073(14) 0.0014(14)
    C14 0.0246(18) 0.0246(18) 0.0149(16) -0.0002(15) 0.0061(13) 0.0015(14)
    C15 0.0240(18) 0.0239(18) 0.0190(17) 0.0028(15) 0.0051(14) 0.0028(14)
    C16 0.030(2) 0.0263(19) 0.0288(19) -0.0013(16) 0.0095(16) 0.0026(16)
    C17 0.044(2) 0.025(2) 0.035(2) -0.0033(18) 0.0131(18) -0.0044(17)
    C18 0.054(3) 0.028(2) 0.038(2) 0.0048(19) 0.025(2) -0.0050(18)
    C19 0.037(2) 0.035(2) 0.031(2) 0.0023(18) 0.0196(17) 0.0016(17)
    C20 0.031(2) 0.0259(19) 0.0241(18) -0.0001(16) 0.0100(15) 0.0018(15)
    C21 0.0258(18) 0.0243(18) 0.0141(16) -0.0023(15) 0.0086(13) -0.0041(14)
    C22 0.0256(19) 0.032(2) 0.0199(17) -0.0033(15) 0.0114(14) -0.0073(15)
    C23 0.034(2) 0.032(2) 0.0223(18) -0.0053(17) 0.0141(16) -0.0028(16)
    C24 0.034(2) 0.027(2) 0.0213(18) 0.0026(16) 0.0109(15) 0.0033(15)
    C25 0.0266(18) 0.0237(18) 0.0151(16) -0.0027(15) 0.0063(13) -0.0025(14)
    F1 0.0467(14) 0.0339(12) 0.0290(11) 0.0017(10) 0.0210(10) -0.0079(10)
    F2 0.0231(11) 0.0510(14) 0.0288(11) -0.0029(10) 0.0071(9) 0.0009(10)
    F3 0.0469(14) 0.0498(15) 0.0262(11) 0.0041(12) 0.0216(10) 0.0087(11)
    F4 0.0408(13) 0.0301(12) 0.0407(13) -0.0095(10) 0.0140(10) -0.0037(10)
    F5 0.0386(13) 0.0525(15) 0.0204(11) -0.0054(11) 0.0022(9) 0.0040(10)
    F6 0.0436(13) 0.0321(12) 0.0397(13) 0.0093(10) 0.0209(11) 0.0134(10)
    O1 0.0367(16) 0.0474(18) 0.0324(15) 0.0055(14) -0.0023(12) 0.0050(14)
    O2 0.0428(17) 0.059(2) 0.0367(16) 0.0097(15) 0.0171(13) 0.0160(15)
    S1 0.0325(5) 0.0388(6) 0.0245(5) 0.0050(4) 0.0060(4) 0.0075(4)
    S2 0.0287(5) 0.0271(5) 0.0346(5) -0.0028(4) 0.0159(4) -0.0006(4)

_geom_special_details                   
;

All esds (except the esd in the dihedral angle between two l.s. planes)
are estimated using the full covariance matrix.  The cell esds are taken
into account individually in the estimation of esds in distances, angles
and torsion angles; correlations between esds in cell parameters are only
used when they are defined by crystal symmetry.  An approximate (isotropic)
treatment of cell esds is used for estimating esds involving l.s. planes.
;

loop_
    _geom_bond_atom_site_label_1
    _geom_bond_atom_site_label_2
    _geom_bond_site_symmetry_2
    _geom_bond_distance
    _geom_bond_publ_flag
    C1 C2 . 1.531(5) ?
    C2 C3 . 1.486(5) ?
    C3 C4 . 1.342(5) ?
    C3 S1 . 1.787(4) ?
    C4 C21 . 1.482(5) ?
    C4 C5 . 1.485(5) ?
    C5 C6 . 1.389(5) ?
    C5 C10 . 1.416(5) ?
    C6 C7 . 1.393(6) ?
    C7 C8 . 1.375(6) ?
    C8 C9 . 1.385(6) ?
    C9 C10 . 1.406(6) ?
    C10 S1 . 1.715(4) ?
    C11 C12 . 1.526(5) ?
    C12 C13 . 1.486(5) ?
    C13 C14 . 1.357(5) ?
    C13 S2 . 1.743(3) ?
    C14 C15 . 1.449(5) ?
    C14 C25 . 1.478(5) ?
    C15 C20 . 1.399(5) ?
    C15 C16 . 1.403(5) ?
    C16 C17 . 1.373(5) ?
    C17 C18 . 1.396(6) ?
    C18 C19 . 1.378(6) ?
    C19 C20 . 1.390(5) ?
    C20 S2 . 1.739(4) ?
    C21 C25 . 1.335(5) ?
    C21 C22 . 1.509(4) ?
    C22 F2 . 1.354(4) ?
    C22 F1 . 1.357(4) ?
    C22 C23 . 1.530(5) ?
    C23 F3 . 1.338(4) ?
    C23 F4 . 1.345(4) ?
    C23 C24 . 1.539(5) ?
    C24 F6 . 1.349(4) ?
    C24 F5 . 1.359(4) ?
    C24 C25 . 1.500(5) ?
    O1 S1 . 1.433(3) ?
    O2 S1 . 1.432(3) ?

loop_
    _geom_angle_atom_site_label_1
    _geom_angle_atom_site_label_2
    _geom_angle_atom_site_label_3
    _geom_angle_site_symmetry_1
    _geom_angle_site_symmetry_3
    _geom_angle
    _geom_angle_publ_flag
    C3 C2 C1 . . 113.0(3) ?
    C4 C3 C2 . . 131.4(3) ?
    C4 C3 S1 . . 109.2(3) ?
    C2 C3 S1 . . 119.4(3) ?
    C3 C4 C21 . . 122.9(3) ?
    C3 C4 C5 . . 115.1(3) ?
    C21 C4 C5 . . 121.9(3) ?
    C6 C5 C10 . . 119.5(4) ?
    C6 C5 C4 . . 129.4(3) ?
    C10 C5 C4 . . 111.0(3) ?
    C5 C6 C7 . . 119.0(4) ?
    C8 C7 C6 . . 121.6(4) ?
    C7 C8 C9 . . 120.5(4) ?
    C8 C9 C10 . . 118.9(4) ?
    C9 C10 C5 . . 120.2(4) ?
    C9 C10 S1 . . 129.1(3) ?
    C5 C10 S1 . . 110.7(3) ?
    C13 C12 C11 . . 114.7(3) ?
    C14 C13 C12 . . 130.0(3) ?
    C14 C13 S2 . . 111.6(3) ?
    C12 C13 S2 . . 118.4(3) ?
    C13 C14 C15 . . 113.5(3) ?
    C13 C14 C25 . . 123.3(3) ?
    C15 C14 C25 . . 123.2(3) ?
    C20 C15 C16 . . 118.1(3) ?
    C20 C15 C14 . . 111.7(3) ?
    C16 C15 C14 . . 130.2(3) ?
    C17 C16 C15 . . 120.0(3) ?
    C16 C17 C18 . . 120.5(4) ?
    C19 C18 C17 . . 121.1(4) ?
    C18 C19 C20 . . 117.8(4) ?
    C19 C20 C15 . . 122.4(4) ?
    C19 C20 S2 . . 126.6(3) ?
    C15 C20 S2 . . 111.0(3) ?
    C25 C21 C4 . . 127.4(3) ?
    C25 C21 C22 . . 111.3(3) ?
    C4 C21 C22 . . 121.3(3) ?
    F2 C22 F1 . . 106.0(3) ?
    F2 C22 C21 . . 111.2(3) ?
    F1 C22 C21 . . 113.0(3) ?
    F2 C22 C23 . . 112.7(3) ?
    F1 C22 C23 . . 109.6(3) ?
    C21 C22 C23 . . 104.5(3) ?
    F3 C23 F4 . . 107.7(3) ?
    F3 C23 C22 . . 113.5(3) ?
    F4 C23 C22 . . 109.6(3) ?
    F3 C23 C24 . . 113.6(3) ?
    F4 C23 C24 . . 108.9(3) ?
    C22 C23 C24 . . 103.5(3) ?
    F6 C24 F5 . . 106.2(3) ?
    F6 C24 C25 . . 114.8(3) ?
    F5 C24 C25 . . 110.7(3) ?
    F6 C24 C23 . . 111.4(3) ?
    F5 C24 C23 . . 109.3(3) ?
    C25 C24 C23 . . 104.4(3) ?
    C21 C25 C14 . . 127.3(3) ?
    C21 C25 C24 . . 110.5(3) ?
    C14 C25 C24 . . 122.0(3) ?
    O2 S1 O1 . . 118.33(18) ?
    O2 S1 C10 . . 110.4(2) ?
    O1 S1 C10 . . 111.24(18) ?
    O2 S1 C3 . . 110.31(18) ?
    O1 S1 C3 . . 109.78(18) ?
    C10 S1 C3 . . 94.09(18) ?
    C20 S2 C13 . . 92.15(17) ?

_shelx_res_file                         
;


    nagakawa01.res created by SHELXL-2014/7

TITL nagakawa01 in P2(1)/c
CELL 0.71073  13.16490  10.54100  16.52970  90.0000  99.8593  90.0000
ZERR    4.00   0.00080   0.00060   0.00100   0.0000   0.0022   0.0000
LATT 1
SYMM -X, 0.5+Y, 0.5-Z
SFAC C  H  O  F  S
UNIT 100  72  8  24  8
OMIT 0 1 1
OMIT 0 0 2
L.S. 75
ACTA
BOND
FMAP 2
PLAN 20
SIZE 0.090 0.196 0.280
TEMP -173
WGHT    0.007700    7.062100
FVAR       0.11819
MOLE 1
C1    1    0.765072    0.557760    1.049570    11.00000    0.04952    0.04348 =
         0.02938   -0.00236    0.01412    0.01082
AFIX 137
H1A   2    0.697808    0.541886    1.015363    11.00000   -1.50000
H1B   2    0.767373    0.644942    1.070398    11.00000   -1.50000
H1C   2    0.775510    0.498341    1.095850    11.00000   -1.50000
AFIX   0
C2    1    0.850279    0.539183    0.998156    11.00000    0.04123    0.03629 =
         0.02207   -0.00390    0.00713    0.00165
AFIX  23
H2A   2    0.842671    0.604269    0.954355    11.00000   -1.20000
H2B   2    0.918074    0.552195    1.033636    11.00000   -1.20000
AFIX   0
C3    1    0.848363    0.411364    0.959954    11.00000    0.02759    0.03348 =
         0.02086    0.00465    0.00413    0.00312
C4    1    0.835203    0.375146    0.881042    11.00000    0.02233    0.02512 =
         0.02152   -0.00008    0.00948    0.00193
C5    1    0.844242    0.236563    0.867704    11.00000    0.01944    0.02841 =
         0.03213    0.00182    0.00940    0.00130
C6    1    0.831541    0.168669    0.794640    11.00000    0.03091    0.02769 =
         0.02794   -0.00116    0.01104    0.00279
AFIX  43
H6    2    0.815906    0.211301    0.743381    11.00000   -1.20000
AFIX   0
C7    1    0.842057    0.037201    0.797610    11.00000    0.03115    0.03313 =
         0.03743   -0.00462    0.01229   -0.00202
AFIX  43
H7    2    0.831578   -0.009621    0.747767    11.00000   -1.20000
AFIX   0
C8    1    0.867222   -0.026489    0.870870    11.00000    0.02691    0.02820 =
         0.05229   -0.00074    0.01219    0.00013
AFIX  43
H8    2    0.876912   -0.115796    0.870856    11.00000   -1.20000
AFIX   0
C9    1    0.878569    0.038481    0.944723    11.00000    0.02259    0.03909 =
         0.04409    0.01518    0.00640    0.00374
AFIX  43
H9    2    0.894790   -0.005715    0.995379    11.00000   -1.20000
AFIX   0
C10   1    0.865678    0.170916    0.943463    11.00000    0.01884    0.03039 =
         0.03972    0.01268   -0.00136   -0.00117
C11   1    0.572519    0.199959    0.836373    11.00000    0.03901    0.02483 =
         0.04218   -0.00053    0.01490   -0.00161
AFIX 137
H11A  2    0.626598    0.208227    0.884814    11.00000   -1.50000
H11B  2    0.583169    0.121555    0.807079    11.00000   -1.50000
H11C  2    0.504950    0.197281    0.853633    11.00000   -1.50000
AFIX   0
C12   1    0.576944    0.313363    0.779669    11.00000    0.03004    0.02419 =
         0.03116   -0.00430    0.00851   -0.00207
AFIX  23
H12A  2    0.641792    0.308703    0.757064    11.00000   -1.20000
H12B  2    0.518996    0.306871    0.733006    11.00000   -1.20000
AFIX   0
C13   1    0.571788    0.439103    0.819466    11.00000    0.02580    0.02841 =
         0.01674    0.00142    0.00727    0.00119
C14   1    0.637523    0.539028    0.824445    11.00000    0.02461    0.02458 =
         0.01492    0.00153    0.00611   -0.00020
C15   1    0.604202    0.647439    0.867010    11.00000    0.02395    0.02387 =
         0.01900    0.00279    0.00507    0.00279
C16   1    0.652203    0.765077    0.886282    11.00000    0.02983    0.02629 =
         0.02878    0.00261    0.00948   -0.00135
AFIX  43
H16   2    0.715999    0.783522    0.869315    11.00000   -1.20000
AFIX   0
C17   1    0.606896    0.853514    0.929682    11.00000    0.04441    0.02543 =
         0.03514   -0.00440    0.01309   -0.00329
AFIX  43
H17   2    0.640539    0.932114    0.943959    11.00000   -1.20000
AFIX   0
C18   1    0.511774    0.828817    0.952989    11.00000    0.05436    0.02833 =
         0.03777   -0.00499    0.02535    0.00478
AFIX  43
H18   2    0.480214    0.892317    0.981089    11.00000   -1.20000
AFIX   0
C19   1    0.462906    0.713909    0.935924    11.00000    0.03658    0.03501 =
         0.03142    0.00162    0.01955    0.00233
AFIX  43
H19   2    0.398903    0.696487    0.952836    11.00000   -1.20000
AFIX   0
C20   1    0.510281    0.624333    0.893171    11.00000    0.03052    0.02589 =
         0.02405    0.00177    0.00997   -0.00014
C21   1    0.816512    0.466184    0.811769    11.00000    0.02583    0.02429 =
         0.01410   -0.00406    0.00857   -0.00227
C22   1    0.897990    0.493018    0.760042    11.00000    0.02559    0.03166 =
         0.01988   -0.00727    0.01137   -0.00330
C23   1    0.860649    0.613550    0.712507    11.00000    0.03386    0.03185 =
         0.02234   -0.00282    0.01412   -0.00530
C24   1    0.744281    0.615846    0.714871    11.00000    0.03376    0.02693 =
         0.02125    0.00330    0.01085    0.00262
C25   1    0.733105    0.538162    0.788843    11.00000    0.02656    0.02366 =
         0.01513   -0.00250    0.00634   -0.00268
F1    4    0.908120    0.398227    0.706472    11.00000    0.04671    0.03388 =
         0.02904   -0.00791    0.02102    0.00167
F2    4    0.991973    0.507276    0.807302    11.00000    0.02309    0.05105 =
         0.02883    0.00090    0.00710   -0.00289
F3    4    0.882631    0.616334    0.636458    11.00000    0.04695    0.04975 =
         0.02621    0.00872    0.02159    0.00409
F4    4    0.904928    0.715571    0.752875    11.00000    0.04076    0.03008 =
         0.04066   -0.00374    0.01404   -0.00950
F5    4    0.692311    0.561532    0.645332    11.00000    0.03856    0.05250 =
         0.02043    0.00397    0.00224   -0.00538
F6    4    0.708591    0.735700    0.715840    11.00000    0.04364    0.03212 =
         0.03966    0.01340    0.02089    0.00928
O1    3    0.978495    0.281183    1.068446    11.00000    0.03671    0.04744 =
         0.03241    0.00497   -0.00227    0.00549
O2    3    0.793148    0.253848    1.069630    11.00000    0.04282    0.05924 =
         0.03671    0.01599    0.01706    0.00969
S1    5    0.875019    0.274832    1.024201    11.00000    0.03251    0.03880 =
         0.02450    0.00749    0.00605    0.00496
S2    5    0.465414    0.472486    0.865788    11.00000    0.02874    0.02708 =
         0.03456   -0.00057    0.01585   -0.00279
HKLF 4

REM  nagakawa01 in P2(1)/c
REM R1 =  0.0571 for    3574 Fo > 4sig(Fo)  and  0.0637 for all    4017 data
REM    318 parameters refined using      0 restraints

END

WGHT      0.0077      7.0680

REM Highest difference peak  0.671,  deepest hole -0.509,  1-sigma level  0.072
Q1    1   0.8385  0.2013  0.9771  11.00000  0.05    0.67
Q2    1   0.8022  0.3517  1.0967  11.00000  0.05    0.41
Q3    1   0.7604  0.1104  0.9641  11.00000  0.05    0.41
Q4    1   0.3862  0.4949  0.7900  11.00000  0.05    0.39
Q5    1   0.8497  0.1931  0.9086  11.00000  0.05    0.37
Q6    1   0.7830  0.4757  1.1109  11.00000  0.05    0.36
Q7    1   0.8392  0.3040  0.8677  11.00000  0.05    0.34
Q8    1   0.8576  0.4790  0.7910  11.00000  0.05    0.33
Q9    1   0.8433  0.3335  1.0544  11.00000  0.05    0.33
Q10   1   0.9557  0.1591  1.0015  11.00000  0.05    0.32
Q11   1   0.8760  0.1398  0.9436  11.00000  0.05    0.31
Q12   1   0.8755  0.5552  0.7356  11.00000  0.05    0.27
Q13   1   0.8238  0.4123  0.8460  11.00000  0.05    0.26
Q14   1   0.7635  0.4653  0.7908  11.00000  0.05    0.26
Q15   1   0.7738  0.2764  0.9980  11.00000  0.05    0.25
Q16   1   0.5562  0.6417  0.8805  11.00000  0.05    0.24
Q17   1   0.8807  0.0626  1.0024  11.00000  0.05    0.24
Q18   1   0.4513  0.9450  0.9449  11.00000  0.05    0.24
Q19   1   0.8025  0.6070  0.6983  11.00000  0.05    0.24
Q20   1   0.6898  0.5370  0.8097  11.00000  0.05    0.23
;
_shelx_res_checksum                     70253

_shelx_hkl_file                         
;
   2   0   0   11.58    0.63
   2   0   0    9.12    0.63
   2   0   0   11.15    0.64
   2   0   0   10.07    0.63
   2   0   0   10.86    0.64
   2   0   0   11.22    0.63
  -2   0   0   11.53    0.64
  -2   0   0   10.03    0.63
  -2   0   0   10.76    0.64
  -2   0   0   10.15    0.63
  -2   0   0   11.36    0.64
  -2   0   0   11.72    0.64
  -2   0   0    9.25    0.63
  -2   0   0   11.87    0.64
  -2   0   0    9.33    0.63
   2   0   0   11.05    0.64
  -3   0   0  771.49   47.53
  -3   0   0  909.57   47.55
  -3   0   0  742.30   47.53
  -3   0   0  879.05   47.54
  -3   0   0  896.45   47.54
   3   0   0  861.77   47.54
   3   0   0  760.67   47.53
   3   0   0  948.81   47.55
   3   0   0  746.02   47.53
   3   0   0  900.35   47.55
  -3   0   0 1000.00   47.54
  -3   0   0  826.78   47.53
  -3   0   0  787.50   47.53
   4   0   0  264.19   14.53
   4   0   0  256.90   14.52
   4   0   0  258.38   14.52
  -4   0   0  268.01   14.52
  -4   0   0  258.98   14.52
  -4   0   0  264.66   14.53
  -4   0   0  249.24   14.52
   4   0   0  243.64   14.51
   4   0   0  256.19   14.53
   4   0   0  250.02   14.52
   4   0   0  265.21   14.53
  -4   0   0  254.52   14.51
  -4   0   0  262.80   14.53
  -4   0   0  262.14   14.53
  -4   0   0  264.85   14.52
  -4   0   0  261.55   14.53
   5   0   0   99.58    5.95
   5   0   0  107.72    5.95
  -5   0   0  107.66    5.97
  -5   0   0  109.20    5.96
   5   0   0  105.97    5.97
   5   0   0  100.65    5.94
   5   0   0  104.31    5.96
   5   0   0  106.02    5.95
  -5   0   0  109.24    5.95
  -5   0   0  108.68    5.96
  -5   0   0  107.86    5.95
   5   0   0  108.87    5.97
  -5   0   0  104.27    5.94
  -5   0   0  104.85    5.96
  -5   0   0  102.39    5.95
  -5   0   0  106.52    5.97
  -6   0   0   41.18    2.30
   6   0   0   41.72    2.30
   6   0   0   39.01    2.28
  -6   0   0   41.74    2.30
  -6   0   0   39.76    2.28
  -6   0   0   41.21    2.30
  -6   0   0   40.40    2.27
   6   0   0   36.37    2.30
   6   0   0   40.08    2.28
   6   0   0   38.03    2.30
   6   0   0   41.27    2.28
  -6   0   0   42.64    2.31
  -6   0   0   39.87    2.28
  -6   0   0   42.30    2.29
   6   0   0   39.55    2.31
   6   0   0   37.30    2.27
   6   0   0   41.09    2.31
  -6   0   0   40.13    2.30
   7   0   0  185.46   10.40
  -7   0   0  188.57   10.40
  -7   0   0  185.66   10.40
  -7   0   0  184.91   10.42
  -7   0   0  183.12   10.39
  -7   0   0  185.11   10.42
  -7   0   0  185.59   10.41
  -7   0   0  185.85   10.41
  -7   0   0  185.79   10.41
   7   0   0  189.39   10.43
   7   0   0  185.74   10.42
   7   0   0  185.92   10.40
   7   0   0  181.66   10.40
   7   0   0  178.34   10.41
  -7   0   0  191.04   10.42
   7   0   0  179.94   10.40
   7   0   0  183.05   10.43
  -7   0   0  188.28   10.42
   8   0   0   83.56    4.85
   8   0   0   85.62    4.82
  -8   0   0   84.21    4.85
  -8   0   0   88.53    4.85
   8   0   0   82.51    4.84
  -8   0   0   82.48    4.83
  -8   0   0   86.17    4.84
  -8   0   0   84.81    4.83
   8   0   0   85.78    4.85
   8   0   0   86.11    4.82
   8   0   0   85.30    4.85
  -8   0   0   85.86    4.84
  -8   0   0   87.96    4.83
   8   0   0   85.79    4.81
  -8   0   0   87.07    4.82
   8   0   0   80.23    4.84
   8   0   0   86.24    4.82
  -8   0   0   86.95    4.80
  -8   0   0   86.39    4.85
  -9   0   0   15.28    0.97
  -9   0   0   16.10    0.97
  -9   0   0   16.83    1.02
  -9   0   0   15.19    1.02
  -9   0   0   16.43    0.97
   9   0   0   16.74    1.04
   9   0   0   15.85    1.03
   9   0   0   14.96    0.96
  -9   0   0   15.76    0.93
  -9   0   0   15.10    1.00
   9   0   0   15.76    0.95
  -9   0   0   16.51    1.02
  -9   0   0   16.48    1.02
   9   0   0   15.84    0.96
   9   0   0   16.07    1.02
   9   0   0   14.95    1.03
   9   0   0   16.45    0.97
   9   0   0   16.06    1.02
  -9   0   0   14.97    1.02
 -10   0   0    2.24    0.28
  10   0   0    2.59    0.45
 -10   0   0    2.93    0.38
 -10   0   0    2.33    0.38
  10   0   0    2.00    0.40
  10   0   0    2.50    0.32
  10   0   0    2.30    0.32
 -10   0   0    3.95    0.48
  10   0   0    1.87    0.32
 -10   0   0    2.36    0.42
 -10   0   0    1.61    0.46
 -10   0   0    2.44    0.35
 -10   0   0    2.51    0.46
  10   0   0    1.92    0.40
  10   0   0    1.41    0.38
  10   0   0    1.92    0.45
 -10   0   0    2.57    0.36
  10   0   0    2.18    0.32
 -10   0   0    2.28    0.37
  11   0   0    0.58    0.33
 -11   0   0    1.95    0.48
 -11   0   0    1.08    0.41
  11   0   0    0.21    0.50
 -11   0   0    0.95    0.40
 -11   0   0    0.70    0.21
 -11   0   0    1.01    0.36
 -11   0   0    0.69    0.50
  11   0   0    1.45    0.33
  11   0   0    0.24    0.31
 -11   0   0    1.56    0.40
  11   0   0    0.50    0.40
  11   0   0    1.05    0.27
  11   0   0    0.56    0.42
  11   0   0    0.75    0.38
  11   0   0    0.79    0.51
 -11   0   0    0.47    0.37
 -11   0   0   -0.01    0.50
 -11   0   0    1.45    0.41
 -12   0   0    1.93    0.55
 -12   0   0    3.19    0.50
  12   0   0    2.88    0.44
 -12   0   0    2.93    0.51
  12   0   0    3.10    0.65
 -12   0   0    3.09    0.53
 -12   0   0    2.58    0.33
  12   0   0    2.22    0.41
 -12   0   0    3.22    0.45
  12   0   0    2.12    0.48
  12   0   0    3.93    0.42
  12   0   0    2.87    0.43
  12   0   0    3.36    0.64
 -12   0   0    2.13    0.55
  12   0   0    2.80    0.54
  12   0   0    2.31    0.53
 -13   0   0    0.99    0.46
  13   0   0    1.24    0.56
  13   0   0    0.92    0.43
 -13   0   0    1.77    0.55
 -13   0   0    0.75    0.25
 -13   0   0    0.53    0.53
  13   0   0    0.71    0.44
 -13   0   0    1.37    0.69
  13   0   0    1.26    0.68
 -13   0   0    0.90    0.54
 -13   0   0    1.12    0.61
  13   0   0    1.11    0.70
  13   0   0    0.48    0.58
 -13   0   0    0.43    0.53
  13   0   0    0.80    0.56
  13   0   0    1.04    0.36
 -13   0   0    0.69    0.53
 -13   0   0    1.12    0.67
 -13   0   0    0.83    0.46
  14   0   0   -1.07    0.81
 -14   0   0    0.38    0.62
 -14   0   0    0.51    0.58
  14   0   0    0.27    0.67
  14   0   0   -0.11    0.50
  14   0   0    0.19    0.81
 -14   0   0    0.22    0.65
 -14   0   0    0.05    0.53
 -14   0   0   -0.66    0.60
  14   0   0    0.45    0.69
 -14   0   0   -0.13    0.80
  14   0   0    0.23    0.40
  14   0   0   -0.10    0.49
 -14   0   0    0.15    0.78
 -14   0   0    0.65    0.66
 -14   0   0   -0.42    0.66
  14   0   0   -0.74    1.17
 -14   0   0   -0.67    0.61
  15   0   0    3.26    0.86
  15   0   0    1.40    0.63
 -15   0   0    2.50    0.82
  15   0   0    1.49    0.85
  15   0   0   -0.28    1.22
  15   0   0    1.47    0.65
 -15   0   0    0.87    0.78
 -15   0   0    2.19    0.72
  15   0   0    2.42    0.90
 -15   0   0    2.46    0.68
 -15   0   0    1.14    0.86
  15   0   0    2.16    0.48
 -15   0   0    2.25    0.85
 -15   0   0    2.29    0.77
 -15   0   0    1.07    0.76
 -15   0   0    1.26    0.79
 -15   0   0    1.45    0.79
   0  -1   0   -0.04    0.03
   0  -1   0    0.01    0.02
   0  -1   0   -0.05    0.02
   0  -1   0    0.06    0.03
  -2  -1   0  274.37   15.64
  -2  -1   0  259.40   15.65
   2  -1   0  274.17   15.65
  -2  -1   0  282.83   15.65
   2  -1   0  290.16   15.65
  -2  -1   0  263.91   15.64
  -2  -1   0  304.07   15.64
  -2  -1   0  261.39   15.64
   2  -1   0  292.88   15.65
  -2  -1   0  259.94   15.64
  -2  -1   0  273.76   15.64
   2  -1   0  286.90   15.65
   2  -1   0  263.55   15.65
   2  -1   0  271.89   15.64
  -2   1   0  271.52   15.65
   2   1   0  264.40   15.65
  -2   1   0  292.05   15.65
   2   1   0  244.58   15.64
   2   1   0  298.02   15.63
  -2   1   0  307.83   15.65
   2   1   0  313.93   15.64
  -2   1   0  274.53   15.64
   2   1   0  273.06   15.65
  -2   1   0  313.81   15.65
   2   1   0  244.83   15.64
   2   1   0  298.15   15.63
   3  -1   0   78.61    4.43
  -3  -1   0   78.62    4.43
   3  -1   0   78.03    4.44
   3  -1   0   76.78    4.43
  -3  -1   0   80.88    4.44
  -3  -1   0   78.15    4.43
  -3  -1   0   79.96    4.43
   3  -1   0   83.11    4.44
  -3  -1   0   79.06    4.43
  -3  -1   0   71.99    4.43
  -3  -1   0   76.92    4.44
   3  -1   0   78.65    4.43
  -3  -1   0   78.49    4.43
   3  -1   0   81.45    4.44
   3  -1   0   76.48    4.43
   3  -1   0   76.74    4.44
   3   1   0   75.54    4.43
   3   1   0   74.20    4.44
  -3   1   0   77.05    4.43
  -3   1   0   79.25    4.44
   3   1   0   78.24    4.43
  -3   1   0   83.58    4.44
  -3   1   0   90.72    4.45
   3   1   0   81.10    4.43
  -3   1   0   80.58    4.44
   3   1   0   79.73    4.43
   3   1   0   77.23    4.44
   3   1   0   77.88    4.44
   3   1   0   73.83    4.43
  -3   1   0   78.80    4.43
  -3   1   0   81.29    4.44
  -3   1   0   80.90    4.44
  -4  -1   0  231.09   13.78
  -4  -1   0  254.44   13.78
   4  -1   0  248.97   13.79
  -4  -1   0  255.47   13.79
  -4  -1   0  250.13   13.78
  -4  -1   0  223.07   13.77
   4  -1   0  242.20   13.79
  -4  -1   0  241.99   13.79
  -4  -1   0  249.47   13.79
  -4  -1   0  246.51   13.78
   4  -1   0  233.56   13.78
   4  -1   0  249.73   13.78
   4  -1   0  253.91   13.79
   4  -1   0  246.22   13.78
   4  -1   0  254.41   13.79
  -4  -1   0  252.53   13.78
   4  -1   0  235.84   13.78
  -4   1   0  256.41   13.79
   4   1   0  241.44   13.79
   4   1   0  243.06   13.78
  -4   1   0  256.18   13.78
  -4   1   0  246.00   13.79
  -4   1   0  250.21   13.79
   4   1   0  235.26   13.79
   4   1   0  244.59   13.78
   4   1   0  246.66   13.79
   4   1   0  235.88   13.78
  -4   1   0  253.04   13.78
  -4   1   0  256.69   13.80
   4   1   0  240.26   13.78
  -4   1   0  245.96   13.78
  -4   1   0  252.49   13.78
   4   1   0  237.05   13.78
   4   1   0  244.30   13.78
  -5  -1   0   10.33    0.66
   5  -1   0   11.62    0.66
   5  -1   0   11.74    0.68
   5  -1   0   10.18    0.64
   5  -1   0   11.43    0.67
   5  -1   0   10.46    0.67
  -5  -1   0   11.21    0.65
   5  -1   0   11.79    0.65
  -5  -1   0   10.43    0.67
   5  -1   0   10.82    0.65
  -5  -1   0   10.60    0.67
   5  -1   0   10.86    0.67
  -5  -1   0   10.32    0.64
  -5  -1   0    9.43    0.63
  -5  -1   0   10.68    0.64
  -5  -1   0   10.87    0.64
  -5  -1   0   11.24    0.66
   5  -1   0   10.69    0.66
   5   1   0   10.60    0.65
   5   1   0   10.04    0.67
   5   1   0   10.44    0.65
   5   1   0   10.62    0.64
  -5   1   0   11.16    0.65
  -5   1   0   11.23    0.66
   5   1   0   11.25    0.63
  -5   1   0   11.49    0.67
  -5   1   0   11.16    0.68
   5   1   0   11.21    0.67
  -5   1   0   11.68    0.65
  -5   1   0   10.73    0.65
  -5   1   0   10.36    0.66
  -5   1   0   10.91    0.63
   5   1   0   11.27    0.67
  -5   1   0   10.79    0.68
   5   1   0   10.53    0.65
   5   1   0   11.29    0.64
   6  -1   0    1.08    0.18
  -6  -1   0    1.11    0.20
   6  -1   0    1.20    0.22
  -6  -1   0    1.43    0.19
  -6  -1   0    1.23    0.21
  -6  -1   0    1.72    0.19
  -6  -1   0    1.47    0.22
  -6  -1   0    1.65    0.17
   6  -1   0    1.48    0.18
   6  -1   0    1.38    0.20
   6  -1   0    1.87    0.20
  -6  -1   0    1.30    0.19
  -6  -1   0    1.05    0.15
   6  -1   0    1.82    0.20
  -6  -1   0    1.39    0.22
  -6   1   0    1.37    0.19
   6   1   0    1.12    0.18
   6   1   0    1.15    0.21
  -6   1   0    1.81    0.24
   6   1   0    1.37    0.22
  -6   1   0    2.24    0.32
  -6   1   0    1.57    0.21
  -6   1   0    1.51    0.19
   6   1   0    1.36    0.22
   6   1   0    1.06    0.16
   6   1   0    1.07    0.23
  -6   1   0    1.86    0.26
  -6   1   0    1.42    0.25
   6   1   0    1.14    0.15
   6   1   0    1.10    0.22
   6   1   0    1.16    0.15
  -6   1   0    1.99    0.21
  -7  -1   0   20.30    1.28
  -7  -1   0   20.88    1.25
   7  -1   0   23.54    1.25
  -7  -1   0   18.93    1.25
  -7  -1   0   21.19    1.28
   7  -1   0   23.82    1.25
   7  -1   0   24.59    1.24
  -7  -1   0   19.90    1.28
  -7  -1   0   20.47    1.26
  -7  -1   0   20.58    1.24
   7  -1   0   23.83    1.28
  -7  -1   0   18.89    1.23
   7  -1   0   21.94    1.29
  -7  -1   0   21.79    1.27
  -7  -1   0   21.46    1.27
   7  -1   0   22.38    1.25
   7  -1   0   23.22    1.29
  -7   1   0   23.24    1.26
  -7   1   0   22.43    1.27
   7   1   0   19.72    1.28
  -7   1   0   24.38    1.26
   7   1   0   20.60    1.26
   7   1   0   19.54    1.28
  -7   1   0   23.29    1.23
   7   1   0   18.50    1.25
  -7   1   0   22.27    1.28
   7   1   0   19.45    1.23
  -7   1   0   24.99    1.28
   7   1   0   19.63    1.26
  -7   1   0   23.85    1.26
   7   1   0   19.18    1.24
  -7   1   0   21.62    1.28
   7   1   0   20.67    1.24
   7   1   0   20.20    1.28
   8  -1   0   12.80    0.86
  -8  -1   0   11.11    0.84
  -8  -1   0   12.03    0.84
   8  -1   0   14.06    0.83
  -8  -1   0   12.19    0.81
   8  -1   0   13.77    0.88
  -8  -1   0   12.71    0.85
  -8  -1   0   12.65    0.86
   8  -1   0   15.03    0.87
  -8  -1   0   12.88    0.84
   8  -1   0   13.48    0.83
   8  -1   0   13.69    0.86
   8  -1   0   12.97    0.84
  -8  -1   0   12.46    0.81
  -8  -1   0   12.33    0.78
  -8  -1   0   13.55    0.81
   8  -1   0   14.01    0.81
  -8  -1   0   12.85    0.86
   8   1   0   12.71    0.84
   8   1   0   12.78    0.82
  -8   1   0   13.82    0.86
  -8   1   0   15.43    0.87
  -8   1   0   15.57    0.86
  -8   1   0   12.83    0.82
   8   1   0   14.97    0.90
   8   1   0   12.35    0.79
   8   1   0   12.34    0.86
   8   1   0   11.89    0.87
  -8   1   0   13.14    0.84
   8   1   0   12.14    0.84
  -8   1   0   14.91    0.83
   8   1   0   14.28    0.88
  -8   1   0   13.96    0.83
  -8   1   0   14.96    0.79
  -8   1   0   13.68    0.85
   8   1   0   12.82    0.80
  -9  -1   0    2.84    0.38
  -9  -1   0    2.68    0.32
  -9  -1   0    2.38    0.27
   9  -1   0    3.61    0.44
   9  -1   0    2.29    0.67
   9  -1   0    2.53    0.39
  -9  -1   0    2.76    0.34
   9  -1   0    2.68    0.33
  -9  -1   0    4.19    0.57
   9  -1   0    3.79    0.44
   9  -1   0    3.07    0.69
  -9  -1   0    3.10    0.42
   9  -1   0    3.31    0.39
   9  -1   0    3.38    0.38
  -9  -1   0    3.45    0.36
  -9  -1   0    2.74    0.39
   9  -1   0    2.66    0.34
  -9  -1   0    2.98    0.42
  -9  -1   0    3.33    0.42
   9   1   0    2.01    0.29
  -9   1   0    2.92    0.29
   9   1   0    3.26    0.40
  -9   1   0    3.13    0.38
   9   1   0    3.17    0.33
  -9   1   0    2.60    0.36
  -9   1   0    2.78    0.37
  -9   1   0    3.41    0.39
   9   1   0    3.62    0.40
   9   1   0    2.12    0.38
  -9   1   0    3.10    0.46
  -9   1   0    3.81    0.47
  -9   1   0    2.58    0.35
   9   1   0    2.49    0.30
  -9   1   0    4.56    0.49
   9   1   0    3.25    0.46
   9   1   0    2.80    0.39
  -9   1   0    3.51    0.39
  10  -1   0   20.80    1.39
  10  -1   0   23.70    1.41
 -10  -1   0   22.50    1.33
 -10  -1   0   22.32    1.39
 -10  -1   0   21.63    1.37
  10  -1   0   22.81    1.40
  10  -1   0   22.37    1.32
 -10  -1   0   22.45    1.28
  10  -1   0   23.11    1.31
 -10  -1   0   20.40    1.37
 -10  -1   0   21.04    1.36
 -10  -1   0   23.75    1.33
 -10  -1   0   23.09    1.33
  10  -1   0   22.30    1.32
  10  -1   0   22.02    1.39
 -10  -1   0   21.51    1.37
  10   1   0   25.58    1.40
 -10   1   0   21.06    1.38
  10   1   0   22.54    1.31
  10   1   0   21.73    1.36
 -10   1   0   19.86    1.37
 -10   1   0   20.75    1.40
 -10   1   0   21.69    1.36
  10   1   0   20.84    1.31
 -10   1   0   22.02    1.34
 -10   1   0   23.58    1.36
 -10   1   0   23.98    1.36
 -10   1   0   20.27    1.40
  10   1   0   21.69    1.36
  10   1   0   23.54    1.41
  10   1   0   19.95    1.30
  10   1   0   20.65    1.40
 -10   1   0   22.60    1.29
 -10   1   0   24.35    1.38
 -11  -1   0    3.40    0.46
 -11  -1   0    3.16    0.54
  11  -1   0    3.83    0.47
 -11  -1   0    4.15    0.57
 -11  -1   0    3.33    0.54
 -11  -1   0    3.63    0.45
 -11  -1   0    3.42    0.45
 -11  -1   0    2.95    0.34
  11  -1   0    4.15    0.58
  11  -1   0    3.44    0.44
  11  -1   0    3.21    0.41
 -11  -1   0    5.08    0.57
  11  -1   0    4.54    0.61
  11  -1   0    3.56    0.45
 -11  -1   0    4.04    0.50
 -11  -1   0    3.73    0.47
  11  -1   0    2.94    0.47
 -11   1   0    3.68    0.56
 -11   1   0    4.32    0.54
  11   1   0    3.69    0.44
  11   1   0    3.47    0.51
  11   1   0    2.66    0.36
  11   1   0    3.96    0.55
 -11   1   0    5.51    0.76
 -11   1   0    4.72    0.55
  11   1   0    2.51    0.49
  11   1   0    2.90    0.50
 -11   1   0    2.36    0.46
  11   1   0    4.76    0.59
 -11   1   0    2.97    0.55
 -11   1   0    3.25    0.49
  11   1   0    3.69    0.40
 -11   1   0    3.61    0.46
 -11   1   0    3.73    0.46
  12  -1   0    1.34    0.41
 -12  -1   0    1.57    0.54
 -12  -1   0    0.76    0.43
  12  -1   0    0.79    0.39
 -12  -1   0    1.63    0.57
 -12  -1   0    1.18    0.56
  12  -1   0    1.03    0.50
 -12  -1   0    0.75    0.47
 -12  -1   0    0.89    0.23
  12  -1   0    0.85    0.32
 -12  -1   0    1.02    0.40
  12  -1   0    0.18    0.53
  12  -1   0    1.38    0.41
  12  -1   0    0.63    0.50
  12  -1   0    0.16    0.55
 -12  -1   0    1.00    0.47
 -12  -1   0    0.95    0.42
 -12  -1   0    0.28    0.46
  12  -1   0    1.12    0.52
 -12   1   0    0.31    0.44
 -12   1   0    0.97    0.41
 -12   1   0    0.76    0.44
 -12   1   0    1.20    0.50
  12   1   0    1.17    0.60
 -12   1   0    1.54    0.56
  12   1   0    0.46    0.49
 -12   1   0    0.55    0.46
 -12   1   0    1.04    0.46
 -12   1   0    1.65    0.57
 -12   1   0    0.49    0.44
 -12   1   0    0.54    0.37
  12   1   0    0.55    0.34
  12   1   0    0.80    0.50
  12   1   0    1.21    0.31
  12   1   0    1.07    0.60
  12   1   0    0.26    0.33
  12   1   0    0.08    0.51
 -12   1   0    0.76    0.43
  13  -1   0    1.69    0.77
  13  -1   0    2.35    0.50
 -13  -1   0    2.24    0.55
 -13  -1   0    1.80    0.55
  13  -1   0    2.82    0.84
  13  -1   0    2.29    0.59
 -13  -1   0    2.56    0.55
 -13  -1   0    1.86    0.56
  13  -1   0    1.92    0.52
  13  -1   0    2.11    0.58
  13  -1   0    1.71    0.39
 -13  -1   0    1.35    0.66
 -13  -1   0    3.34    0.72
 -13  -1   0    3.14    0.62
 -13  -1   0    3.07    0.68
  13  -1   0    3.75    0.51
  13  -1   0    3.01    0.77
 -13  -1   0    3.08    0.50
  13   1   0    2.06    0.46
 -13   1   0    3.29    0.54
 -13   1   0    1.83    0.68
 -13   1   0    2.12    0.67
  13   1   0    1.84    0.59
 -13   1   0    2.98    0.62
  13   1   0    2.26    0.73
 -13   1   0    2.52    0.49
  13   1   0    3.11    0.40
 -13   1   0    2.88    0.63
  13   1   0    1.84    0.44
 -13   1   0    2.35    0.58
  13   1   0    1.56    0.72
 -13   1   0    2.63    0.58
 -13   1   0    2.16    0.59
  13   1   0    2.91    0.63
 -13   1   0    2.33    0.58
  13   1   0    2.29    0.65
 -14  -1   0    0.36    0.77
 -14  -1   0    0.23    0.58
 -14  -1   0   -0.55    0.61
  14  -1   0   -0.10    0.57
 -14  -1   0    0.08    0.51
 -14  -1   0   -0.39    0.63
 -14  -1   0    0.56    0.60
 -14  -1   0   -0.61    0.65
  14  -1   0   -0.05    0.41
 -14  -1   0   -0.43    0.53
 -14  -1   0    0.50    0.62
  14  -1   0    0.26    0.72
  14  -1   0   -0.50    0.67
 -14  -1   0   -0.66    0.75
  14  -1   0   -0.25    0.65
  14  -1   0   -0.19    0.73
  14  -1   0    0.28    0.85
  14  -1   0   -0.22    0.55
  14  -1   0   -0.30    0.87
  14   1   0    0.07    0.74
 -14   1   0   -0.54    1.00
 -14   1   0   -0.34    0.53
 -14   1   0    0.47    0.82
 -14   1   0   -0.78    0.65
  14   1   0    0.52    0.73
  14   1   0   -0.44    0.43
 -14   1   0    0.45    0.57
  14   1   0    0.26    0.67
 -14   1   0   -0.04    0.63
  14   1   0    0.02    0.38
 -14   1   0   -0.14    0.70
  14   1   0   -0.19    0.75
 -14   1   0   -0.38    0.63
 -14   1   0   -0.46    0.79
 -14   1   0    0.28    0.69
  14   1   0    0.20    0.45
  14   1   0   -0.41    0.69
 -15  -1   0   -0.94    0.72
 -15  -1   0   -1.04    0.90
 -15  -1   0   -0.21    0.73
 -15  -1   0   -0.65    0.74
  15  -1   0   -0.15    0.90
 -15  -1   0    0.07    0.63
  15  -1   0    0.70    1.01
 -15  -1   0   -0.10    0.63
  15  -1   0    0.09    0.79
  15  -1   0   -0.25    0.81
  15  -1   0    0.36    0.49
  15  -1   0   -0.32    0.67
 -15  -1   0    0.21    0.73
  15  -1   0    0.63    1.03
 -15  -1   0   -0.43    0.78
 -15  -1   0    0.31    0.79
 -15  -1   0   -0.09    0.89
  15  -1   0   -0.27    0.66
 -15   1   0    0.14    0.75
 -15   1   0   -0.50    0.98
 -15   1   0   -0.33    0.96
  15   1   0    0.29    0.86
 -15   1   0   -0.32    0.76
  15   1   0    0.78    1.20
  15   1   0   -0.05    0.87
  15   1   0   -0.53    0.56
 -15   1   0   -0.76    0.97
  15   1   0    0.53    0.90
  15   1   0    0.50    0.84
 -15   1   0   -0.19    0.74
  15   1   0   -0.03    0.59
 -15   1   0    0.03    0.66
 -15   1   0   -0.10    0.73
 -15   1   0   -0.39    0.67
 -15   1   0   -0.51    0.79
   0  -2   0    3.81    0.23
   0  -2   0    3.38    0.23
   0  -2   0    4.00    0.27
   0  -2   0    3.00    0.23
   0  -2   0    3.23    0.23
   0  -2   0    3.12    0.22
   0  -2   0    3.76    0.24
   0  -2   0    3.15    0.24
   0  -2   0    3.78    0.23
   0  -2   0    3.70    0.22
   0   2   0    3.17    0.23
   0   2   0    3.18    0.22
   0   2   0    3.06    0.24
   0   2   0    3.08    0.23
   0   2   0    3.59    0.23
   0   2   0    3.33    0.22
   0   2   0    3.03    0.24
   0   2   0    3.78    0.23
  -1  -2   0    2.20    0.17
  -1  -2   0    2.76    0.18
  -1  -2   0    2.68    0.15
   1  -2   0    2.56    0.18
   1  -2   0    2.63    0.18
   1  -2   0    2.57    0.19
   1  -2   0    2.64    0.18
   1  -2   0    2.89    0.17
   1  -2   0    2.46    0.18
   1  -2   0    2.73    0.22
  -1  -2   0    2.50    0.15
  -1  -2   0    2.25    0.16
  -1  -2   0    2.33    0.15
   1  -2   0    2.60    0.17
  -1  -2   0    2.05    0.17
   1  -2   0    2.50    0.17
  -1  -2   0    2.67    0.15
  -1  -2   0    2.74    0.19
  -1   2   0    2.61    0.18
  -1   2   0    2.60    0.18
   1   2   0    2.38    0.15
  -1   2   0    2.37    0.18
  -1   2   0    2.50    0.18
   1   2   0    2.52    0.15
   1   2   0    2.16    0.15
   1   2   0    2.42    0.15
  -1   2   0    2.82    0.18
  -1   2   0    2.51    0.17
  -1   2   0    2.53    0.21
   2  -2   0    0.39    0.10
  -2  -2   0    0.35    0.10
  -2  -2   0    0.30    0.04
   2  -2   0    0.16    0.13
   2  -2   0    0.30    0.12
  -2  -2   0    0.25    0.04
  -2  -2   0    0.31    0.04
   2  -2   0    0.32    0.08
  -2  -2   0    0.32    0.04
   2  -2   0    0.61    0.09
   2  -2   0    0.04    0.09
   2  -2   0    0.40    0.13
   2  -2   0    0.43    0.09
  -2   2   0    0.33    0.12
  -2   2   0    0.38    0.09
  -2   2   0    0.22    0.12
  -2   2   0    0.33    0.05
  -2   2   0    0.56    0.10
  -2   2   0    0.16    0.09
  -2   2   0    0.26    0.09
  -2   2   0    0.34    0.12
  -2   2   0    0.27    0.08
   3  -2   0    2.61    0.22
  -3  -2   0    1.98    0.15
   3  -2   0    2.01    0.17
  -3  -2   0    1.96    0.14
   3  -2   0    2.15    0.23
  -3  -2   0    2.02    0.17
  -3  -2   0    1.53    0.19
   3  -2   0    2.03    0.21
   3  -2   0    2.10    0.18
   3  -2   0    1.76    0.18
  -3  -2   0    1.70    0.15
  -3  -2   0    1.75    0.13
   3  -2   0    1.93    0.19
   3  -2   0    2.34    0.20
  -3  -2   0    1.69    0.20
   3  -2   0    2.60    0.22
  -3   2   0    1.94    0.19
  -3   2   0    2.31    0.19
  -3   2   0    1.59    0.19
  -3   2   0    2.07    0.22
  -3   2   0    1.88    0.21
  -3   2   0    2.33    0.20
  -3   2   0    1.99    0.21
  -3   2   0    2.26    0.19
  -3   2   0    2.26    0.17
   4  -2   0   17.64    1.07
   4  -2   0   18.78    1.08
   4  -2   0   17.39    1.06
  -4  -2   0   17.57    1.05
  -4  -2   0   17.52    1.07
  -4  -2   0   17.69    1.07
   4  -2   0   18.32    1.08
   4  -2   0   18.27    1.06
  -4  -2   0   18.86    1.07
  -4  -2   0   18.30    1.05
   4  -2   0   19.18    1.07
  -4  -2   0   18.59    1.06
   4  -2   0   18.46    1.06
  -4  -2   0   18.31    1.07
   4   2   0   19.00    1.04
   4   2   0   16.11    1.04
  -4   2   0   19.99    1.06
   4   2   0   18.47    1.08
  -4   2   0   18.25    1.06
   4   2   0   19.09    1.04
   4   2   0   18.01    1.08
  -4   2   0   19.93    1.09
  -4   2   0   19.41    1.08
  -4   2   0   18.68    1.07
   4   2   0   16.51    1.04
  -4   2   0   21.04    1.09
   5  -2   0    0.02    0.26
   5  -2   0    0.41    0.22
   5  -2   0    0.01    0.12
  -5  -2   0    0.10    0.13
   5  -2   0    0.23    0.14
  -5  -2   0    0.15    0.13
  -5  -2   0   -0.22    0.14
   5  -2   0    0.07    0.14
  -5  -2   0    0.07    0.17
  -5  -2   0    0.21    0.14
  -5  -2   0    0.03    0.12
   5  -2   0   -0.08    0.15
   5  -2   0    0.17    0.16
  -5  -2   0    0.03    0.10
   5  -2   0    0.43    0.21
  -5  -2   0    0.15    0.15
   5  -2   0    0.16    0.27
  -5  -2   0    0.13    0.10
  -5  -2   0    0.20    0.15
  -5   2   0   -0.24    0.15
  -5   2   0    0.10    0.14
  -5   2   0    0.46    0.13
   5   2   0    0.26    0.08
   5   2   0   -0.06    0.15
   5   2   0    0.35    0.11
   5   2   0   -0.02    0.16
   5   2   0    0.01    0.11
  -5   2   0    0.28    0.15
   5   2   0   -0.10    0.11
  -5   2   0   -0.21    0.20
  -5   2   0    0.28    0.17
   5   2   0    0.20    0.08
  -5   2   0    0.51    0.14
  -5   2   0    0.34    0.12
  -5   2   0    0.44    0.21
   6  -2   0    6.50    0.44
  -6  -2   0    6.80    0.43
   6  -2   0    6.20    0.49
   6  -2   0    6.67    0.51
  -6  -2   0    6.25    0.45
  -6  -2   0    6.89    0.43
  -6  -2   0    7.12    0.48
  -6  -2   0    6.27    0.44
   6  -2   0    6.47    0.48
   6  -2   0    7.17    0.47
   6  -2   0    6.30    0.46
  -6  -2   0    7.36    0.49
  -6  -2   0    7.24    0.48
  -6  -2   0    7.01    0.49
   6  -2   0    6.62    0.47
   6  -2   0    6.74    0.51
   6  -2   0    6.76    0.48
  -6  -2   0    6.92    0.45
  -6  -2   0    6.81    0.45
  -6   2   0    6.95    0.47
   6   2   0    7.12    0.44
  -6   2   0    6.28    0.47
  -6   2   0    6.24    0.43
   6   2   0    6.79    0.41
  -6   2   0    6.56    0.46
  -6   2   0    7.56    0.48
  -6   2   0    6.92    0.53
   6   2   0    7.05    0.49
  -6   2   0    7.35    0.46
  -6   2   0    7.07    0.53
   6   2   0    6.32    0.41
   6   2   0    5.85    0.44
   6   2   0    7.23    0.44
   6   2   0    7.02    0.50
  -7  -2   0    1.54    0.19
   7  -2   0    0.74    0.24
  -7  -2   0    0.65    0.18
  -7  -2   0    0.89    0.21
   7  -2   0    0.84    0.24
  -7  -2   0    0.81    0.24
  -7  -2   0    1.38    0.23
   7  -2   0    1.27    0.25
   7  -2   0    0.94    0.36
   7  -2   0    1.19    0.32
   7  -2   0    0.67    0.20
  -7  -2   0    1.19    0.24
  -7  -2   0    1.33    0.21
  -7  -2   0    0.88    0.19
   7  -2   0    1.89    0.26
  -7  -2   0    1.40    0.23
  -7  -2   0    1.51    0.28
   7  -2   0    0.76    0.30
  -7   2   0    0.96    0.24
  -7   2   0    1.43    0.23
  -7   2   0    0.88    0.30
   7   2   0    0.99    0.24
   7   2   0    0.72    0.23
  -7   2   0    1.16    0.31
   7   2   0    1.38    0.28
   7   2   0    0.86    0.14
   7   2   0    0.74    0.15
   7   2   0    1.15    0.22
  -7   2   0    1.15    0.25
  -7   2   0    0.60    0.22
  -7   2   0    1.25    0.18
  -7   2   0    1.14    0.23
  -7   2   0    1.33    0.25
  -7   2   0    0.51    0.23
   7   2   0    1.15    0.21
   8  -2   0   -0.06    0.37
  -8  -2   0    0.57    0.25
  -8  -2   0    0.73    0.21
  -8  -2   0    0.76    0.18
   8  -2   0    0.03    0.24
  -8  -2   0    0.22    0.20
   8  -2   0    0.26    0.27
   8  -2   0    0.54    0.25
  -8  -2   0    0.29    0.25
   8  -2   0    0.64    0.25
   8  -2   0    0.07    0.39
  -8  -2   0    0.97    0.26
  -8  -2   0    0.68    0.24
  -8  -2   0    0.69    0.22
   8  -2   0    0.52    0.23
   8  -2   0    0.83    0.20
  -8  -2   0    0.44    0.25
  -8  -2   0    0.29    0.29
   8  -2   0    0.42    0.24
  -8   2   0    0.37    0.25
   8   2   0    0.73    0.19
   8   2   0    0.39    0.16
   8   2   0    0.70    0.27
  -8   2   0    0.86    0.26
   8   2   0    1.36    0.30
  -8   2   0    0.54    0.37
   8   2   0    0.60    0.25
  -8   2   0    1.40    0.39
   8   2   0    0.87    0.29
   8   2   0    0.40    0.24
  -8   2   0    0.30    0.25
  -8   2   0    0.93    0.24
   8   2   0    0.51    0.16
  -8   2   0    0.98    0.26
  -8   2   0    0.67    0.27
  -8   2   0    1.15    0.26
  -8   2   0    0.67    0.28
  -9  -2   0    0.89    0.24
   9  -2   0    0.71    0.41
  -9  -2   0    0.71    0.30
   9  -2   0    0.78    0.27
  -9  -2   0    1.45    0.26
   9  -2   0    0.31    0.27
  -9  -2   0    0.65    0.33
  -9  -2   0    0.62    0.24
   9  -2   0    0.58    0.33
  -9  -2   0    0.62    0.31
  -9  -2   0    0.70    0.29
   9  -2   0    1.03    0.30
  -9  -2   0    0.74    0.30
  -9  -2   0    1.02    0.31
   9  -2   0    0.55    0.22
   9  -2   0    0.65    0.41
  -9  -2   0    0.89    0.19
   9  -2   0    0.86    0.25
   9  -2   0    0.30    0.31
  -9   2   0    0.28    0.29
  -9   2   0    1.43    0.32
   9   2   0    0.63    0.21
  -9   2   0    0.65    0.29
  -9   2   0    0.95    0.32
  -9   2   0    1.43    0.40
   9   2   0    1.15    0.34
   9   2   0    0.87    0.22
   9   2   0    0.27    0.32
  -9   2   0    1.20    0.21
  -9   2   0    0.44    0.30
  -9   2   0    1.21    0.46
  -9   2   0    0.33    0.30
   9   2   0    0.61    0.20
  -9   2   0    0.57    0.39
   9   2   0    0.62    0.33
 -10  -2   0    4.62    0.45
  10  -2   0    4.75    0.64
  10  -2   0    3.90    0.63
 -10  -2   0    5.29    0.51
  10  -2   0    5.43    0.52
  10  -2   0    5.70    0.58
 -10  -2   0    3.90    0.47
  10  -2   0    4.20    0.55
 -10  -2   0    4.33    0.47
 -10  -2   0    7.18    0.77
  10  -2   0    5.26    0.52
  10  -2   0    4.60    0.45
 -10  -2   0    3.60    0.51
 -10  -2   0    5.08    0.50
 -10  -2   0    4.21    0.44
 -10  -2   0    4.17    0.55
 -10  -2   0    3.98    0.38
  10  -2   0    4.56    0.45
  10  -2   0    3.48    0.52
 -10   2   0    5.38    0.56
 -10   2   0    4.99    0.40
  10   2   0    4.35    0.60
  10   2   0    4.56    0.61
 -10   2   0    4.32    0.56
 -10   2   0    5.15    0.54
 -10   2   0    5.66    0.55
  10   2   0    3.80    0.39
  10   2   0    4.46    0.49
 -10   2   0    4.83    0.52
  10   2   0    4.07    0.41
 -10   2   0    5.35    0.57
 -10   2   0    4.33    0.55
  10   2   0    4.56    0.39
  10   2   0    4.48    0.53
 -10   2   0    5.41    0.58
 -10   2   0    5.17    0.55
  10   2   0    5.25    0.60
 -11  -2   0   11.47    0.93
 -11  -2   0   11.71    0.95
  11  -2   0   16.21    1.09
 -11  -2   0   13.55    0.86
 -11  -2   0   11.36    0.85
 -11  -2   0   13.78    0.93
  11  -2   0   11.07    0.98
  11  -2   0   12.12    0.90
  11  -2   0   12.81    0.90
 -11  -2   0   12.55    0.92
 -11  -2   0   13.88    0.86
 -11  -2   0   11.93    0.94
 -11  -2   0   12.53    0.78
 -11  -2   0   13.05    0.94
  11  -2   0   12.76    1.08
  11  -2   0   12.86    0.86
  11  -2   0   13.15    0.86
  11  -2   0   12.62    0.95
  11   2   0   12.94    0.99
 -11   2   0   11.77    0.97
 -11   2   0   12.73    0.86
 -11   2   0   12.54    0.94
 -11   2   0   13.39    0.81
  11   2   0   11.27    0.91
 -11   2   0   13.33    0.94
  11   2   0   12.25    0.99
 -11   2   0   11.92    0.94
 -11   2   0   13.13    0.91
 -11   2   0   13.09    0.98
  11   2   0   12.75    0.90
  11   2   0   12.83    0.81
 -11   2   0   10.98    0.97
 -11   2   0   14.10    0.95
  11   2   0   12.04    0.82
  11   2   0   12.56    0.81
 -11   2   0   14.27    0.95
  11   2   0   13.02    0.99
 -12  -2   0    0.67    0.41
 -12  -2   0    0.59    0.51
 -12  -2   0    1.12    0.57
 -12  -2   0    0.33    0.75
  12  -2   0    0.52    0.45
 -12  -2   0    0.56    0.42
  12  -2   0    1.50    0.37
 -12  -2   0    1.50    0.56
  12  -2   0    0.53    0.63
 -12  -2   0    0.80    0.24
  12  -2   0    0.43    0.85
  12  -2   0    0.34    0.65
 -12  -2   0    0.46    0.50
  12  -2   0    0.94    0.49
  12  -2   0    0.72    0.50
  12  -2   0    0.48    0.38
 -12  -2   0    0.48    0.51
 -12  -2   0    0.81    0.40
  12  -2   0    1.09    0.50
  12   2   0    1.06    0.32
  12   2   0   -0.46    0.47
 -12   2   0    0.79    0.47
 -12   2   0    0.78    0.46
 -12   2   0    1.25    0.47
  12   2   0    1.12    0.53
 -12   2   0    0.52    0.61
 -12   2   0    0.38    0.47
 -12   2   0    0.46    0.47
 -12   2   0    0.92    0.59
  12   2   0    0.89    0.47
 -12   2   0    1.30    0.40
 -12   2   0    0.53    0.31
  12   2   0    0.65    0.30
 -12   2   0    0.86    0.47
 -12   2   0    0.35    0.48
  12   2   0    0.85    0.52
  12   2   0    0.74    0.33
 -13  -2   0   11.24    1.02
  13  -2   0   13.15    0.95
 -13  -2   0   12.78    1.02
 -13  -2   0   11.77    1.02
  13  -2   0   10.44    1.22
  13  -2   0   11.86    0.84
  13  -2   0   11.59    1.20
  13  -2   0   11.88    0.90
 -13  -2   0   11.05    1.02
  13  -2   0   11.00    1.05
 -13  -2   0   11.42    1.01
 -13  -2   0   11.67    0.90
  13  -2   0   10.52    1.10
 -13  -2   0   11.63    0.93
  13  -2   0   12.80    0.97
 -13  -2   0   11.47    1.01
  13  -2   0   13.46    1.07
 -13  -2   0   13.21    0.96
 -13   2   0   10.33    0.89
  13   2   0   12.40    1.12
 -13   2   0   11.56    1.08
 -13   2   0   11.92    0.78
 -13   2   0   12.53    1.05
 -13   2   0    9.92    1.06
 -13   2   0   11.98    0.98
 -13   2   0   12.29    0.99
  13   2   0   11.31    0.98
  13   2   0   10.30    0.98
  13   2   0   10.47    1.12
  13   2   0   10.84    0.82
 -13   2   0   10.07    1.00
  13   2   0    9.62    0.80
 -13   2   0   10.25    0.96
 -13   2   0   10.28    0.95
 -13   2   0   10.13    1.02
  14  -2   0    2.52    0.77
  14  -2   0    1.68    0.63
 -14  -2   0    2.28    0.73
  14  -2   0    2.97    0.49
 -14  -2   0    2.48    0.64
 -14  -2   0    1.87    0.71
 -14  -2   0    3.17    0.69
  14  -2   0    2.51    0.72
  14  -2   0    2.10    0.77
 -14  -2   0    2.66    0.65
 -14  -2   0    2.80    0.76
 -14  -2   0    2.68    0.78
 -14  -2   0    2.84    0.59
  14  -2   0    1.77    0.61
 -14  -2   0    2.80    0.64
  14  -2   0    2.81    0.55
 -14  -2   0    1.50    0.67
  14   2   0    2.33    0.86
 -14   2   0    2.07    0.69
 -14   2   0    1.12    0.65
  14   2   0    2.41    0.48
 -14   2   0    2.98    0.58
 -14   2   0    3.28    0.42
 -14   2   0    2.88    0.69
  14   2   0    3.50    0.77
 -14   2   0    1.90    0.72
  14   2   0    3.01    0.69
  14   2   0    1.83    0.48
 -14   2   0    2.93    0.85
 -14   2   0    2.69    0.72
  14   2   0    3.55    0.68
 -14   2   0    2.58    0.64
 -14   2   0    3.08    0.86
 -14   2   0    1.77    0.66
  15  -2   0    0.54    0.81
 -15  -2   0   -0.57    0.79
  15  -2   0    1.30    0.61
 -15  -2   0   -0.17    0.73
 -15  -2   0    0.50    0.65
 -15  -2   0    0.61    0.74
  15  -2   0    0.00    0.76
 -15  -2   0   -0.09    0.68
 -15  -2   0   -0.31    0.76
 -15  -2   0    1.40    0.84
  15  -2   0    0.32    0.50
 -15  -2   0   -0.38    0.88
  15  -2   0    0.79    0.90
  15  -2   0    0.93    0.73
 -15  -2   0   -0.18    0.74
 -15  -2   0    0.40    0.88
  15  -2   0   -0.18    0.73
 -15   2   0    1.11    0.96
 -15   2   0    0.74    1.00
 -15   2   0    0.66    0.93
 -15   2   0    0.74    0.80
  15   2   0    0.52    0.53
  15   2   0    1.08    0.79
  15   2   0    0.81    0.87
 -15   2   0    0.78    0.73
  15   2   0    0.42    0.78
 -15   2   0   -0.84    0.79
  15   2   0    1.30    0.87
  15   2   0    0.07    0.50
 -15   2   0    0.55    0.77
 -15   2   0   -0.59    0.92
 -15   2   0    0.32    0.42
 -15   2   0   -1.10    0.92
 -15   2   0    0.47    0.60
   0  -3   0    1.21    0.16
   0  -3   0    1.32    0.14
   0  -3   0    1.26    0.14
   0  -3   0    1.10    0.15
   0  -3   0    1.05    0.09
   0  -3   0    1.45    0.14
   0  -3   0    0.89    0.11
   0  -3   0    1.53    0.13
   0  -3   0    1.08    0.12
   0   3   0    1.07    0.12
   0   3   0    1.25    0.12
   0   3   0    0.98    0.12
   0   3   0    1.02    0.13
   0   3   0    1.53    0.16
   0   3   0    1.12    0.17
   0   3   0    1.02    0.13
   1  -3   0  106.58    6.04
   1  -3   0  103.62    6.04
   1  -3   0  103.89    6.04
  -1  -3   0  103.40    6.04
   1  -3   0  113.63    6.04
  -1  -3   0  106.66    6.03
   1  -3   0  117.46    6.06
   1  -3   0  112.82    6.04
  -1  -3   0  101.86    6.03
   1  -3   0  112.00    6.05
  -1  -3   0  104.89    6.04
  -1  -3   0  109.19    6.03
  -1  -3   0  109.52    6.04
  -1  -3   0  108.51    6.03
   1  -3   0  108.64    6.03
   1  -3   0  109.83    6.03
   1   3   0  104.02    6.02
   1   3   0  104.50    6.02
  -1   3   0  111.29    6.04
   1   3   0  103.19    6.02
  -1   3   0  108.16    6.04
   1   3   0  103.53    6.02
   1   3   0  101.74    6.05
  -1   3   0  109.67    6.04
  -1   3   0  106.83    6.04
  -1   3   0  103.72    6.04
  -1   3   0  113.19    6.06
  -1   3   0  104.13    6.04
   2  -3   0    1.51    0.15
  -2  -3   0    0.93    0.08
   2  -3   0    1.02    0.15
  -2  -3   0    1.18    0.14
  -2  -3   0    0.94    0.08
  -2  -3   0    1.27    0.17
   2  -3   0    1.23    0.18
  -2  -3   0    1.23    0.14
   2  -3   0    1.31    0.20
   2  -3   0    1.72    0.18
  -2  -3   0    1.06    0.08
   2  -3   0    0.94    0.13
   2  -3   0    1.23    0.15
  -2  -3   0    1.03    0.09
   2  -3   0    0.95    0.15
   2  -3   0    1.24    0.14
  -2   3   0    1.37    0.17
  -2   3   0    1.60    0.18
  -2   3   0    1.16    0.20
  -2   3   0    1.18    0.14
  -2   3   0    1.24    0.14
  -2   3   0    1.46    0.17
  -2   3   0    1.25    0.14
  -2   3   0    1.22    0.14
  -2   3   0    0.98    0.07
  -2   3   0    1.11    0.17
  -3  -3   0    1.73    0.20
  -3  -3   0    1.46    0.11
   3  -3   0    1.73    0.23
   3  -3   0    1.70    0.18
   3  -3   0    1.56    0.19
   3  -3   0    1.94    0.23
   3  -3   0    1.73    0.24
  -3  -3   0    1.67    0.18
  -3  -3   0    1.33    0.11
  -3  -3   0    1.45    0.11
  -3  -3   0    1.37    0.11
   3  -3   0    1.47    0.18
   3  -3   0    1.71    0.23
   3  -3   0    1.55    0.19
  -3   3   0    1.49    0.20
  -3   3   0    1.66    0.19
  -3   3   0    1.60    0.18
  -3   3   0    1.72    0.19
  -3   3   0    2.20    0.25
  -3   3   0    1.91    0.12
  -3   3   0    1.70    0.18
  -3   3   0    1.94    0.18
  -3   3   0    2.47    0.22
  -3   3   0    2.15    0.22
  -4  -3   0   44.37    2.47
   4  -3   0   42.60    2.47
  -4  -3   0   41.45    2.44
  -4  -3   0   48.30    2.50
   4  -3   0   43.54    2.46
  -4  -3   0   40.57    2.44
  -4  -3   0   43.03    2.47
   4  -3   0   43.47    2.48
  -4  -3   0   42.66    2.47
  -4  -3   0   39.56    2.44
   4  -3   0   47.30    2.48
   4  -3   0   40.36    2.47
  -4  -3   0   40.18    2.44
   4  -3   0   42.45    2.46
   4  -3   0   46.69    2.48
   4  -3   0   44.16    2.47
   4  -3   0   43.53    2.46
  -4   3   0   44.24    2.44
  -4   3   0   42.92    2.46
  -4   3   0   41.28    2.47
  -4   3   0   47.04    2.47
  -4   3   0   44.86    2.47
  -4   3   0   43.40    2.46
  -4   3   0   43.37    2.47
  -4   3   0   44.23    2.47
   5  -3   0    2.14    0.26
   5  -3   0    1.86    0.22
   5  -3   0    2.07    0.24
   5  -3   0    1.90    0.27
   5  -3   0    1.61    0.22
  -5  -3   0    1.82    0.19
  -5  -3   0    2.03    0.24
  -5  -3   0    1.84    0.17
  -5  -3   0    1.87    0.24
   5  -3   0    2.01    0.29
  -5  -3   0    2.35    0.25
  -5  -3   0    1.53    0.19
  -5  -3   0    1.62    0.22
  -5  -3   0    1.90    0.27
  -5  -3   0    1.78    0.22
   5  -3   0    2.70    0.31
   5  -3   0    2.25    0.26
  -5  -3   0    1.73    0.17
  -5   3   0    2.39    0.24
  -5   3   0    2.32    0.29
  -5   3   0    2.01    0.29
  -5   3   0    2.43    0.24
  -5   3   0    2.29    0.25
  -5   3   0    2.05    0.22
  -5   3   0    1.74    0.18
  -5   3   0    1.89    0.25
  -5   3   0    2.08    0.25
  -5   3   0    2.21    0.28
   6  -3   0   10.36    0.67
   6  -3   0   11.04    0.72
  -6  -3   0   10.22    0.68
  -6  -3   0   10.39    0.69
  -6  -3   0    9.95    0.68
  -6  -3   0   10.19    0.62
  -6  -3   0   11.50    0.69
  -6  -3   0   10.78    0.66
  -6  -3   0   10.17    0.68
   6  -3   0    9.98    0.69
   6  -3   0    9.79    0.68
   6  -3   0    9.81    0.71
   6  -3   0    9.75    0.66
   6  -3   0   10.36    0.68
   6  -3   0   11.69    0.66
   6  -3   0   10.64    0.68
  -6  -3   0   10.20    0.62
  -6  -3   0   10.68    0.64
  -6  -3   0   10.90    0.64
   6   3   0   10.97    0.60
  -6   3   0   10.68    0.68
  -6   3   0   11.09    0.71
   6   3   0    9.41    0.60
  -6   3   0   11.84    0.65
   6   3   0   10.52    0.60
  -6   3   0   10.96    0.71
   6   3   0    9.76    0.60
  -6   3   0   11.22    0.68
  -6   3   0   11.92    0.71
   7  -3   0    0.07    0.23
   7  -3   0    0.16    0.21
  -7  -3   0    0.51    0.21
   7  -3   0    0.29    0.22
  -7  -3   0    0.48    0.21
   7  -3   0    0.45    0.19
   7  -3   0   -0.17    0.23
  -7  -3   0   -0.26    0.25
   7  -3   0    0.14    0.23
  -7  -3   0    0.33    0.24
  -7  -3   0    0.23    0.16
   7  -3   0    0.29    0.35
  -7  -3   0    0.37    0.23
   7  -3   0   -0.36    0.33
  -7  -3   0    0.25    0.15
  -7  -3   0   -0.04    0.21
   7  -3   0    0.18    0.23
  -7  -3   0    0.51    0.19
  -7  -3   0    0.35    0.20
  -7   3   0   -0.34    0.25
  -7   3   0    0.44    0.17
  -7   3   0    0.06    0.31
  -7   3   0   -0.18    0.31
   7   3   0    0.36    0.10
  -7   3   0    0.21    0.21
  -7   3   0    0.30    0.17
  -7   3   0    0.31    0.27
  -7   3   0   -0.16    0.27
   7   3   0    0.10    0.12
   7   3   0    0.29    0.10
   7   3   0    0.25    0.13
  -7   3   0    0.17    0.22
  -7   3   0    0.43    0.21
   7   3   0   -0.09    0.24
  -7   3   0   -0.04    0.22
  -8  -3   0   -0.04    0.24
   8  -3   0    0.20    0.46
  -8  -3   0    0.20    0.22
  -8  -3   0   -0.51    0.30
  -8  -3   0    0.07    0.27
  -8  -3   0   -0.46    0.22
  -8  -3   0    0.29    0.18
   8  -3   0   -0.24    0.25
  -8  -3   0    0.20    0.29
  -8  -3   0    0.43    0.26
   8  -3   0    0.53    0.27
  -8  -3   0    0.32    0.18
   8  -3   0    0.17    0.28
   8  -3   0   -0.09    0.39
  -8  -3   0    0.04    0.25
   8  -3   0   -0.02    0.21
   8  -3   0    0.27    0.26
   8  -3   0    0.38    0.27
   8  -3   0    0.38    0.39
  -8   3   0   -0.07    0.24
  -8   3   0    0.26    0.41
   8   3   0   -0.05    0.29
  -8   3   0   -0.29    0.29
  -8   3   0   -0.19    0.18
  -8   3   0    0.19    0.27
  -8   3   0   -0.07    0.20
  -8   3   0   -0.46    0.30
  -8   3   0    0.26    0.25
  -8   3   0   -0.40    0.24
   8   3   0   -0.08    0.13
   8   3   0   -0.14    0.18
   8   3   0    0.09    0.13
  -8   3   0    0.19    0.31
  -8   3   0   -0.46    0.40
   8   3   0    0.31    0.29
   8   3   0    0.02    0.17
  -9  -3   0   57.59    3.42
   9  -3   0   54.45    3.44
  -9  -3   0   59.33    3.38
  -9  -3   0   58.85    3.43
   9  -3   0   61.30    3.40
   9  -3   0   61.85    3.41
   9  -3   0   61.58    3.41
  -9  -3   0   60.10    3.40
  -9  -3   0   60.60    3.38
  -9  -3   0   61.63    3.40
  -9  -3   0   60.05    3.39
  -9  -3   0   59.83    3.40
   9  -3   0   59.66    3.41
  -9  -3   0   58.85    3.43
   9  -3   0   58.53    3.44
  -9  -3   0   59.29    3.43
   9  -3   0   59.10    3.43
   9  -3   0   58.56    3.46
   9  -3   0   54.87    3.46
  -9   3   0   61.87    3.41
  -9   3   0   59.01    3.43
   9   3   0   57.81    3.36
  -9   3   0   62.51    3.42
   9   3   0   59.22    3.37
   9   3   0   61.18    3.45
  -9   3   0   63.53    3.43
   9   3   0   63.32    3.45
   9   3   0   58.12    3.38
  -9   3   0   61.56    3.39
   9   3   0   58.55    3.37
  -9   3   0   58.87    3.39
  -9   3   0   57.63    3.42
  10  -3   0   16.13    1.00
 -10  -3   0   14.57    1.04
  10  -3   0   14.79    1.11
 -10  -3   0   15.27    0.94
 -10  -3   0   15.77    0.95
 -10  -3   0   15.39    1.03
  10  -3   0   16.27    0.99
 -10  -3   0   13.23    1.00
  10  -3   0   15.08    0.99
 -10  -3   0   14.13    1.02
  10  -3   0   13.80    1.10
 -10  -3   0   15.69    1.01
 -10  -3   0   16.24    0.95
 -10  -3   0   14.60    0.97
 -10  -3   0   15.73    1.05
  10  -3   0   15.10    0.97
  10  -3   0   14.93    1.05
  10  -3   0   17.68    1.18
  10  -3   0   14.69    1.03
  10   3   0   13.66    0.90
  10   3   0   14.87    0.94
 -10   3   0   14.89    1.04
  10   3   0   15.14    1.08
 -10   3   0   14.64    1.17
 -10   3   0   13.89    1.21
 -10   3   0   15.64    0.96
 -10   3   0   14.80    1.01
 -10   3   0   16.09    1.03
  10   3   0   15.22    0.94
 -10   3   0   16.01    0.95
  10   3   0   14.93    0.91
 -10   3   0   15.30    1.05
  10   3   0   14.50    1.08
 -10   3   0   16.26    1.03
 -10   3   0   16.01    1.03
 -10   3   0   15.02    1.18
  11  -3   0   13.16    1.42
 -11  -3   0   19.37    1.16
 -11  -3   0   14.47    1.44
 -11  -3   0   17.90    1.08
 -11  -3   0   14.17    1.12
 -11  -3   0   16.08    1.13
 -11  -3   0   16.83    1.23
  11  -3   0   16.20    1.06
  11  -3   0   16.94    1.08
  11  -3   0   16.07    1.15
  11  -3   0   17.22    1.13
  11  -3   0   20.18    1.30
 -11  -3   0   14.47    1.11
  11  -3   0   14.05    1.28
 -11  -3   0   17.71    1.01
  11  -3   0   17.80    1.13
  11  -3   0   16.66    1.31
 -11   3   0   16.03    1.03
 -11   3   0   14.99    1.18
  11   3   0   15.84    1.02
  11   3   0   16.91    1.04
 -11   3   0   16.09    1.13
 -11   3   0   18.75    1.17
 -11   3   0   18.50    1.17
 -11   3   0   15.39    1.12
  11   3   0   15.69    1.01
  11   3   0   19.26    1.20
 -11   3   0   17.32    1.16
 -11   3   0   13.90    1.26
 -11   3   0   15.78    1.20
 -11   3   0   16.82    1.15
 -11   3   0   17.03    1.05
  11   3   0   17.28    1.05
  11   3   0   16.85    1.20
  12  -3   0    8.28    0.69
 -12  -3   0    6.75    0.82
 -12  -3   0    6.63    0.81
 -12  -3   0    6.74    0.65
 -12  -3   0    9.09    1.18
 -12  -3   0    9.10    0.72
 -12  -3   0    7.22    0.86
  12  -3   0    7.47    0.70
  12  -3   0    5.73    0.87
 -12  -3   0    6.77    0.66
  12  -3   0    7.19    0.83
 -12  -3   0    9.78    1.21
 -12  -3   0    7.98    0.57
  12  -3   0    7.12    0.90
  12  -3   0    9.85    1.23
  12  -3   0    4.84    0.88
  12   3   0    7.40    0.57
 -12   3   0    7.26    0.82
 -12   3   0    7.64    0.91
 -12   3   0    7.34    0.80
 -12   3   0    7.73    0.80
 -12   3   0    7.82    0.78
 -12   3   0    7.30    0.89
 -12   3   0    8.55    0.77
  12   3   0    7.23    0.56
 -12   3   0    6.46    0.79
 -12   3   0    8.63    0.78
 -12   3   0    7.75    0.67
  12   3   0    7.52    0.67
  12   3   0    8.22    0.68
  12   3   0    8.23    0.90
 -12   3   0    8.04    0.62
  12   3   0    9.49    0.92
 -13  -3   0    0.58    0.48
  13  -3   0    2.66    0.88
 -13  -3   0    2.35    0.62
 -13  -3   0    1.52    0.30
  13  -3   0    2.03    0.50
  13  -3   0    1.30    0.54
 -13  -3   0    1.27    0.50
 -13  -3   0    1.62    0.57
 -13  -3   0    0.92    0.92
  13  -3   0    2.67    0.51
  13  -3   0    0.27    0.82
 -13  -3   0    1.74    0.68
 -13  -3   0    2.34    0.51
  13  -3   0    1.21    0.54
  13  -3   0    1.42    0.56
  13  -3   0    2.03    0.69
 -13  -3   0    3.61    0.95
 -13  -3   0    1.24    0.60
  13  -3   0    1.33    0.60
  13   3   0    0.94    0.47
  13   3   0    1.51    0.34
  13   3   0    1.18    0.34
 -13   3   0    2.05    0.78
 -13   3   0    1.88    0.62
 -13   3   0    2.00    0.73
 -13   3   0    2.36    0.47
  13   3   0    1.71    0.48
 -13   3   0    2.12    0.42
 -13   3   0    1.19    0.60
 -13   3   0    0.47    0.60
  13   3   0    2.49    0.67
  13   3   0    1.69    0.64
 -13   3   0    1.84    0.75
 -13   3   0    2.02    0.72
 -13   3   0    0.60    0.57
 -14  -3   0    4.54    0.79
  14  -3   0    5.72    0.82
  14  -3   0    5.55    0.76
 -14  -3   0    4.06    0.76
 -14  -3   0    4.31    0.68
  14  -3   0    5.19    0.78
 -14  -3   0    4.78    0.69
  14  -3   0    5.23    1.14
  14  -3   0    3.32    1.14
 -14  -3   0    6.44    0.78
  14  -3   0    6.01    0.79
  14  -3   0    6.47    1.46
 -14  -3   0    4.01    0.88
 -14  -3   0    4.70    0.68
 -14  -3   0    6.59    0.81
 -14  -3   0    3.94    0.73
 -14  -3   0    6.81    0.84
  14  -3   0    2.81    0.92
  14  -3   0    5.26    0.71
 -14   3   0    5.25    0.83
  14   3   0    3.98    0.61
 -14   3   0    3.20    0.81
 -14   3   0    5.40    0.83
 -14   3   0    4.75    0.64
 -14   3   0    5.75    0.61
 -14   3   0    2.49    0.71
  14   3   0    4.83    0.55
  14   3   0    5.07    0.64
 -14   3   0    4.78    0.92
 -14   3   0    4.47    0.75
 -14   3   0    5.12    0.80
  14   3   0    4.91    0.91
  14   3   0    3.74    0.49
 -14   3   0    4.70    0.95
 -14   3   0    5.72    0.80
 -15  -3   0    2.08    0.71
  15  -3   0    1.69    0.96
  15  -3   0    0.49    0.84
  15  -3   0    1.71    0.65
 -15  -3   0    2.26    0.96
  15  -3   0    1.62    0.87
 -15  -3   0    0.17    0.80
 -15  -3   0    0.98    0.73
 -15  -3   0    1.36    0.85
 -15  -3   0    1.37    0.75
  15  -3   0    0.48    0.82
  15  -3   0    2.64    0.90
 -15  -3   0    1.22    0.79
 -15  -3   0    0.67    0.73
 -15  -3   0    1.20    0.91
  15  -3   0    0.84    1.14
  15  -3   0    1.84    0.58
 -15   3   0    2.27    0.64
 -15   3   0    1.69    1.05
 -15   3   0    1.50    0.89
 -15   3   0    1.36    0.91
 -15   3   0    0.02    0.86
 -15   3   0    1.65    0.51
 -15   3   0    0.75    0.80
 -15   3   0    2.21    0.85
 -15   3   0    1.42    0.84
  15   3   0    2.33    0.94
 -15   3   0    1.74    0.82
   0  -4   0  232.68   12.42
   0  -4   0  214.33   12.42
   0  -4   0  223.12   12.42
   0  -4   0  223.65   12.44
   0  -4   0  234.46   12.46
   0  -4   0  211.01   12.43
   0  -4   0  222.61   12.43
   0  -4   0  234.27   12.43
   0  -4   0  209.22   12.42
   0  -4   0  211.53   12.41
   0   4   0  212.21   12.42
   0   4   0  215.78   12.43
   0   4   0  216.04   12.43
   0   4   0  230.78   12.42
   0   4   0  219.29   12.42
   0   4   0  232.60   12.42
   1  -4   0   19.03    1.13
  -1  -4   0   21.49    1.15
  -1  -4   0   21.45    1.12
  -1  -4   0   18.65    1.12
  -1  -4   0   21.74    1.13
   1  -4   0   19.18    1.13
   1  -4   0   18.41    1.13
   1  -4   0   18.78    1.14
   1  -4   0   19.74    1.18
  -1  -4   0   20.12    1.15
  -1  -4   0   21.88    1.13
   1  -4   0   20.00    1.15
  -1  -4   0   20.67    1.12
  -1  -4   0   19.44    1.13
   1  -4   0   19.79    1.15
   1  -4   0   19.71    1.14
  -1  -4   0   19.24    1.14
   1  -4   0   19.26    1.14
   1   4   0   20.78    1.12
  -1   4   0   18.38    1.13
   1   4   0   20.62    1.12
  -1   4   0   18.88    1.13
  -1   4   0   18.23    1.14
  -1   4   0   18.80    1.13
   1   4   0   20.96    1.12
   1   4   0   21.25    1.18
   1   4   0   18.62    1.14
  -1   4   0   17.65    1.14
   1   4   0   20.05    1.12
   1   4   0   18.32    1.13
  -1   4   0   19.52    1.15
   2  -4   0    0.90    0.18
   2  -4   0    1.39    0.23
  -2  -4   0    0.94    0.14
   2  -4   0    0.59    0.14
   2  -4   0    0.79    0.20
  -2  -4   0    1.18    0.17
   2  -4   0    0.71    0.19
   2  -4   0    0.89    0.15
  -2  -4   0    1.22    0.11
   2  -4   0    0.94    0.15
  -2  -4   0    1.16    0.13
  -2  -4   0    1.11    0.24
   2  -4   0    1.04    0.25
   2  -4   0    1.01    0.15
  -2  -4   0    0.97    0.09
  -2  -4   0    0.77    0.09
  -2  -4   0    0.97    0.12
  -2  -4   0    0.92    0.13
  -2   4   0    0.98    0.19
  -2   4   0    0.76    0.15
  -2   4   0    1.17    0.16
  -2   4   0    0.83    0.17
  -2   4   0    1.16    0.23
  -2   4   0    1.44    0.20
  -2   4   0    0.98    0.16
  -3  -4   0    3.50    0.29
   3  -4   0    3.49    0.30
   3  -4   0    3.12    0.37
  -3  -4   0    3.82    0.34
  -3  -4   0    3.69    0.23
  -3  -4   0    3.39    0.30
  -3  -4   0    3.99    0.23
   3  -4   0    3.53    0.30
  -3  -4   0    3.71    0.23
   3  -4   0    4.02    0.38
   3  -4   0    4.89    0.38
   3  -4   0    3.99    0.32
   3  -4   0    4.15    0.31
  -3  -4   0    3.76    0.23
   3  -4   0    3.59    0.29
  -3   4   0    3.72    0.29
  -3   4   0    3.93    0.32
  -3   4   0    3.58    0.32
  -3   4   0    3.42    0.31
  -3   4   0    4.40    0.31
  -3   4   0    4.58    0.30
  -3   4   0    3.87    0.30
  -3   4   0    3.77    0.23
  -3   4   0    4.60    0.33
  -3   4   0    4.44    0.38
   4  -4   0   12.62    0.75
   4  -4   0   11.62    0.73
   4  -4   0   12.13    0.73
  -4  -4   0   13.12    0.74
  -4  -4   0   10.86    0.68
   4  -4   0   11.92    0.75
  -4  -4   0   11.01    0.72
   4  -4   0   12.55    0.78
   4  -4   0   12.22    0.77
   4  -4   0   12.31    0.74
  -4  -4   0   11.47    0.76
  -4  -4   0   10.90    0.68
  -4  -4   0   11.30    0.74
   4  -4   0   13.39    0.77
   4  -4   0   12.94    0.73
  -4  -4   0   11.94    0.76
  -4   4   0   12.63    0.74
  -4   4   0   12.08    0.69
  -4   4   0   11.57    0.77
  -4   4   0   12.29    0.79
  -4   4   0   13.07    0.75
  -4   4   0   11.27    0.75
  -4   4   0   11.29    0.73
  -4   4   0   12.44    0.74
  -4   4   0   12.80    0.77
  -4   4   0   12.62    0.75
  -5  -4   0    0.93    0.23
   5  -4   0    0.81    0.21
  -5  -4   0    1.32    0.24
   5  -4   0    1.04    0.22
   5  -4   0    1.10    0.31
   5  -4   0    0.83    0.22
  -5  -4   0    1.18    0.11
  -5  -4   0    1.31    0.14
  -5  -4   0    0.82    0.18
   5  -4   0    1.23    0.23
   5  -4   0    0.60    0.25
   5  -4   0    0.83    0.18
  -5  -4   0    1.20    0.20
  -5  -4   0    1.46    0.14
  -5  -4   0    1.00    0.11
  -5  -4   0    0.73    0.21
   5  -4   0    1.37    0.33
  -5   4   0    1.15    0.29
  -5   4   0    1.04    0.13
  -5   4   0    0.49    0.22
  -5   4   0    1.56    0.38
  -5   4   0    1.10    0.16
  -5   4   0    1.29    0.23
  -5   4   0    0.78    0.27
  -5   4   0    1.43    0.21
  -5   4   0    1.25    0.21
  -5   4   0    1.11    0.20
  -5   4   0    1.18    0.32
   6  -4   0   18.11    1.10
   6  -4   0   19.95    1.13
   6  -4   0   18.65    1.10
   6  -4   0   17.68    1.16
  -6  -4   0   18.85    1.12
  -6  -4   0   17.89    1.12
  -6  -4   0   18.89    1.13
  -6  -4   0   18.30    1.06
   6  -4   0   19.26    1.13
   6  -4   0   15.63    1.15
   6  -4   0   18.86    1.11
   6  -4   0   17.49    1.12
  -6  -4   0   19.15    1.10
  -6  -4   0   17.87    1.12
  -6  -4   0   17.84    1.07
  -6  -4   0   17.96    1.07
  -6  -4   0   17.84    1.06
   6  -4   0   18.10    1.13
  -6  -4   0   19.23    1.13
  -6   4   0   17.60    1.11
  -6   4   0   19.73    1.13
  -6   4   0   18.92    1.15
  -6   4   0   17.98    1.11
  -6   4   0   18.08    1.08
  -6   4   0   19.71    1.14
  -6   4   0   20.66    1.09
  -6   4   0   18.47    1.14
  -6   4   0   19.63    1.10
  -6   4   0   17.75    1.12
  -6   4   0   18.12    1.12
   7  -4   0   13.38    0.89
   7  -4   0   11.96    0.93
  -7  -4   0   13.75    0.85
  -7  -4   0   13.35    0.89
  -7  -4   0   14.72    0.88
   7  -4   0   16.53    0.98
  -7  -4   0   12.05    0.88
  -7  -4   0   14.15    0.88
   7  -4   0   11.67    0.87
  -7  -4   0   13.51    0.88
  -7  -4   0   13.87    0.82
   7  -4   0   13.31    0.85
  -7  -4   0   13.26    0.82
  -7  -4   0   14.16    0.80
   7  -4   0   13.46    0.86
   7  -4   0   12.11    0.86
  -7  -4   0   13.35    0.80
  -7   4   0   14.31    0.85
  -7   4   0   13.14    0.87
  -7   4   0   15.32    0.92
  -7   4   0   12.98    0.87
  -7   4   0   13.87    0.87
  -7   4   0   13.98    0.84
  -7   4   0   12.94    0.90
  -7   4   0   13.67    0.81
  -7   4   0   14.71    0.91
  -7   4   0   14.49    0.88
   8  -4   0    0.54    0.31
  -8  -4   0    0.36    0.25
  -8  -4   0    0.33    0.28
  -8  -4   0    1.13    0.26
   8  -4   0    1.24    0.54
  -8  -4   0    0.44    0.30
   8  -4   0    0.05    0.31
  -8  -4   0    0.74    0.19
   8  -4   0   -0.03    0.30
  -8  -4   0    0.38    0.24
  -8  -4   0   -0.18    0.33
   8  -4   0    0.02    0.25
   8  -4   0    0.10    0.31
  -8  -4   0    0.58    0.29
   8  -4   0    0.13    0.31
   8  -4   0    0.40    0.50
   8  -4   0    0.90    0.31
  -8  -4   0    0.62    0.29
  -8  -4   0    0.48    0.18
  -8   4   0    0.41    0.40
  -8   4   0    0.22    0.27
  -8   4   0    0.34    0.24
  -8   4   0    0.24    0.36
  -8   4   0    0.44    0.19
  -8   4   0    0.24    0.28
  -8   4   0    0.64    0.41
  -8   4   0    0.23    0.30
  -8   4   0    0.40    0.32
  -8   4   0    0.44    0.25
  -8   4   0    0.18    0.32
  -9  -4   0   30.89    1.77
  -9  -4   0   29.97    1.84
  -9  -4   0   32.69    1.86
   9  -4   0   33.37    1.81
   9  -4   0   32.44    1.83
  -9  -4   0   29.57    1.80
  -9  -4   0   30.24    1.85
  -9  -4   0   32.07    1.81
   9  -4   0   30.99    1.86
  -9  -4   0   31.31    1.85
  -9  -4   0   30.19    1.81
   9  -4   0   30.42    1.82
   9  -4   0   31.23    1.85
   9  -4   0   29.49    1.86
  -9  -4   0   30.60    1.78
   9  -4   0   31.73    1.83
  -9  -4   0   28.43    1.80
  -9   4   0   29.38    1.87
  -9   4   0   30.16    1.80
  -9   4   0   30.88    1.86
  -9   4   0   29.84    1.85
  -9   4   0   29.00    1.85
  -9   4   0   28.63    1.83
  -9   4   0   30.58    1.78
  -9   4   0   30.75    1.85
  -9   4   0   33.45    1.87
  -9   4   0   34.07    1.81
  -9   4   0   31.04    1.84
 -10  -4   0    0.52    0.44
 -10  -4   0    0.44    0.40
  10  -4   0   -0.09    0.38
  10  -4   0    1.53    0.34
  10  -4   0    0.51    0.35
 -10  -4   0    0.13    0.38
 -10  -4   0    1.21    0.38
  10  -4   0    0.28    0.38
 -10  -4   0    0.22    0.35
  10  -4   0    0.60    0.39
  10  -4   0    0.66    0.41
 -10  -4   0    0.84    0.35
 -10  -4   0    0.95    0.33
  10  -4   0    0.58    0.39
 -10  -4   0    0.19    0.38
 -10  -4   0    0.35    0.28
 -10  -4   0    0.69    0.28
 -10   4   0    1.32    0.48
 -10   4   0    0.71    0.28
 -10   4   0    0.53    0.42
 -10   4   0    0.04    0.46
 -10   4   0    1.00    0.32
 -10   4   0    0.24    0.52
 -10   4   0    0.32    0.35
 -10   4   0    0.95    0.38
 -10   4   0    0.73    0.37
 -10   4   0    0.74    0.54
 -10   4   0    0.21    0.47
  11  -4   0    6.46    1.37
 -11  -4   0    8.07    0.82
 -11  -4   0   10.15    0.87
  11  -4   0    8.72    0.84
 -11  -4   0    9.21    0.76
 -11  -4   0    8.78    0.77
 -11  -4   0    9.89    0.82
 -11  -4   0    7.98    0.67
  11  -4   0    9.33    0.77
 -11  -4   0    9.02    0.69
 -11  -4   0    9.52    0.74
  11  -4   0   11.23    0.75
 -11  -4   0   10.08    0.86
  11  -4   0   10.00    0.78
  11  -4   0    6.25    1.39
 -11  -4   0    7.37    0.67
  11  -4   0   12.87    1.20
 -11   4   0    9.52    0.71
 -11   4   0    8.67    0.81
 -11   4   0   10.88    0.83
 -11   4   0   10.52    0.82
 -11   4   0    7.49    0.91
 -11   4   0    9.82    0.69
 -11   4   0    8.83    0.86
 -11   4   0    9.64    0.83
  11   4   0    7.98    0.53
 -11   4   0    7.63    0.92
 -11   4   0    9.79    0.77
 -11   4   0    9.86    0.83
  12  -4   0   11.46    1.30
 -12  -4   0   15.71    0.97
 -12  -4   0   16.05    0.94
 -12  -4   0   14.96    1.00
 -12  -4   0   12.99    1.17
  12  -4   0   14.50    1.17
 -12  -4   0   15.19    0.99
  12  -4   0   15.77    1.07
 -12  -4   0   14.26    1.13
 -12  -4   0   15.59    1.08
  12  -4   0   15.38    1.05
 -12  -4   0   15.79    1.08
  12  -4   0   12.93    1.28
  12  -4   0   16.02    1.19
 -12  -4   0   16.83    1.50
 -12  -4   0   13.68    1.17
 -12  -4   0   16.14    1.06
  12  -4   0   14.66    1.23
 -12   4   0   17.02    1.32
  12   4   0   12.50    0.89
 -12   4   0   16.90    1.30
 -12   4   0   17.01    1.14
 -12   4   0   14.73    1.14
 -12   4   0   15.87    1.00
  12   4   0   13.39    0.87
 -12   4   0   15.02    1.16
 -12   4   0   14.92    1.14
 -12   4   0   14.62    1.08
 -12   4   0   16.84    1.14
 -12   4   0   15.38    1.14
  12   4   0   12.83    0.87
 -12   4   0   16.09    1.01
  13  -4   0   -0.08    0.51
 -13  -4   0    0.76    0.67
 -13  -4   0   -0.24    0.58
  13  -4   0    0.67    0.60
 -13  -4   0    0.32    0.68
  13  -4   0    0.45    1.09
 -13  -4   0   -0.43    0.61
  13  -4   0   -0.21    0.56
 -13  -4   0    0.20    0.62
 -13  -4   0    0.20    0.46
  13  -4   0    0.00    0.51
 -13  -4   0    0.87    0.63
  13  -4   0    0.31    1.05
  13  -4   0    0.32    0.70
 -13  -4   0   -0.30    0.54
 -13  -4   0   -0.02    0.46
 -13  -4   0    0.38    0.56
  13  -4   0    0.06    0.63
  13  -4   0    0.11    0.58
 -13  -4   0    0.26    0.39
 -13   4   0   -0.81    0.63
 -13   4   0    0.40    0.43
 -13   4   0    0.26    0.81
  13   4   0   -0.15    0.18
  13   4   0   -0.23    0.19
 -13   4   0    0.47    0.66
 -13   4   0    0.13    0.55
 -13   4   0    0.08    0.61
 -13   4   0    0.87    0.80
 -13   4   0    0.11    0.84
 -13   4   0   -0.51    0.51
 -14  -4   0    0.94    0.59
  14  -4   0    0.08    1.06
 -14  -4   0   -0.34    0.62
  14  -4   0   -0.11    0.89
 -14  -4   0    0.80    0.79
  14  -4   0    0.63    1.05
 -14  -4   0    0.07    0.74
 -14  -4   0   -0.27    0.76
  14  -4   0    0.08    0.77
  14  -4   0    0.82    0.67
  14  -4   0    0.07    0.59
 -14  -4   0   -0.04    0.58
 -14  -4   0   -0.07    0.61
  14  -4   0    0.33    0.60
 -14  -4   0   -0.61    0.74
 -14  -4   0    0.01    0.71
  14  -4   0    0.02    0.79
  14  -4   0   -0.63    0.67
 -14  -4   0    0.73    0.74
 -14   4   0    0.11    0.74
 -14   4   0   -0.90    0.74
 -14   4   0    0.39    0.52
 -14   4   0    1.14    0.78
 -14   4   0    0.01    0.81
 -14   4   0   -0.56    0.66
 -14   4   0    0.54    0.67
 -14   4   0    0.33    0.95
 -14   4   0    0.25    0.81
 -14   4   0    0.36    0.94
 -14   4   0    0.12    0.49
   0  -5   0    0.72    0.19
   0  -5   0    0.04    0.17
   0  -5   0    0.37    0.14
   0  -5   0    0.17    0.13
   0  -5   0    0.30    0.14
   0  -5   0    0.16    0.08
   0  -5   0    0.34    0.27
   0  -5   0    0.65    0.25
   0  -5   0    0.24    0.18
   0  -5   0    0.34    0.13
   0   5   0    0.59    0.13
   0   5   0    0.30    0.13
   0   5   0    0.20    0.17
   0   5   0    0.31    0.13
   0   5   0    0.00    0.15
   0   5   0    0.45    0.13
   0   5   0    0.26    0.14
   0   5   0    0.23    0.12
  -1  -5   0    6.46    0.46
  -1  -5   0    6.79    0.41
  -1  -5   0    6.17    0.53
  -1  -5   0    6.20    0.41
   1  -5   0    7.22    0.44
   1  -5   0    6.26    0.42
   1  -5   0    7.46    0.53
  -1  -5   0    6.77    0.43
  -1  -5   0    6.96    0.47
  -1  -5   0    6.40    0.41
   1  -5   0    7.12    0.54
   1  -5   0    6.43    0.47
   1  -5   0    6.98    0.42
   1  -5   0    7.43    0.47
  -1  -5   0    6.81    0.43
  -1  -5   0    6.61    0.50
  -1  -5   0    6.22    0.44
   1  -5   0    6.39    0.47
   1  -5   0    6.56    0.46
   1   5   0    6.66    0.40
   1   5   0    6.84    0.40
  -1   5   0    6.42    0.44
  -1   5   0    6.70    0.45
   1   5   0    6.36    0.48
  -1   5   0    6.59    0.43
  -1   5   0    6.24    0.45
   1   5   0    7.03    0.40
  -1   5   0    6.20    0.47
   1   5   0    6.32    0.40
  -1   5   0    6.36    0.46
   1   5   0    5.85    0.44
   1   5   0    6.57    0.43
  -1   5   0    7.47    0.44
  -1   5   0    6.27    0.43
   2  -5   0   46.57    2.72
   2  -5   0   47.85    2.72
   2  -5   0   50.61    2.74
  -2  -5   0   48.08    2.70
  -2  -5   0   44.86    2.73
  -2  -5   0   48.90    2.73
   2  -5   0   50.27    2.74
  -2  -5   0   49.40    2.75
   2  -5   0   49.42    2.77
   2  -5   0   46.79    2.73
   2  -5   0   49.19    2.73
   2  -5   0   45.45    2.73
  -2  -5   0   48.47    2.72
  -2  -5   0   49.30    2.70
   2  -5   0   50.45    2.74
  -2  -5   0   45.30    2.72
  -2   5   0   47.30    2.73
  -2   5   0   47.06    2.74
  -2   5   0   46.20    2.73
  -2   5   0   48.86    2.74
  -3  -5   0   26.42    1.51
  -3  -5   0   25.95    1.51
  -3  -5   0   25.36    1.50
   3  -5   0   26.86    1.51
   3  -5   0   26.50    1.53
   3  -5   0   28.03    1.54
   3  -5   0   25.62    1.52
   3  -5   0   28.68    1.57
   3  -5   0   26.23    1.51
   3  -5   0   27.66    1.55
   3  -5   0   25.36    1.51
  -3  -5   0   24.78    1.50
  -3  -5   0   26.68    1.54
  -3   5   0   25.98    1.52
  -3   5   0   23.74    1.52
  -3   5   0   27.32    1.51
  -3   5   0   25.89    1.51
  -3   5   0   26.83    1.52
  -3   5   0   25.22    1.52
  -3   5   0   25.78    1.56
  -3   5   0   25.38    1.53
  -3   5   0   24.93    1.51
  -4  -5   0   38.95    2.37
  -4  -5   0   42.64    2.41
   4  -5   0   43.07    2.42
  -4  -5   0   41.92    2.42
   4  -5   0   43.89    2.45
   4  -5   0   41.18    2.42
   4  -5   0   44.78    2.44
   4  -5   0   44.58    2.41
  -4  -5   0   39.07    2.37
  -4  -5   0   41.42    2.37
   4  -5   0   44.59    2.44
   4  -5   0   43.63    2.42
  -4  -5   0   41.92    2.43
   4  -5   0   41.74    2.41
  -4  -5   0   41.31    2.37
   4  -5   0   42.00    2.41
  -4  -5   0   42.40    2.40
  -4  -5   0   43.64    2.41
  -4   5   0   40.95    2.41
  -4   5   0   43.52    2.41
  -4   5   0   40.91    2.37
  -4   5   0   40.55    2.42
  -4   5   0   41.31    2.41
  -4   5   0   42.54    2.42
  -4   5   0   42.02    2.37
  -4   5   0   41.69    2.45
  -4   5   0   43.52    2.42
  -4   5   0   41.56    2.41
  -5  -5   0    4.44    0.28
   5  -5   0    5.04    0.49
   5  -5   0    4.30    0.40
   5  -5   0    4.03    0.39
  -5  -5   0    4.09    0.30
  -5  -5   0    4.45    0.47
  -5  -5   0    4.10    0.30
   5  -5   0    4.67    0.42
   5  -5   0    4.88    0.42
   5  -5   0    5.11    0.50
  -5  -5   0    5.21    0.40
  -5  -5   0    4.99    0.38
   5  -5   0    5.33    0.40
  -5  -5   0    4.31    0.28
   5  -5   0    4.97    0.41
  -5  -5   0    4.51    0.41
  -5  -5   0    4.91    0.43
   5  -5   0    4.86    0.50
  -5   5   0    5.94    0.49
  -5   5   0    5.56    0.44
  -5   5   0    4.24    0.31
  -5   5   0    4.35    0.39
  -5   5   0    4.89    0.50
  -5   5   0    4.42    0.45
  -5   5   0    5.02    0.41
  -5   5   0    4.85    0.41
  -5   5   0    6.12    0.45
  -5   5   0    4.70    0.41
  -5   5   0    5.02    0.30
   6  -5   0   10.94    0.83
  -6  -5   0   10.59    0.74
  -6  -5   0   10.90    0.68
  -6  -5   0   12.50    0.79
  -6  -5   0   11.41    0.76
   6  -5   0   12.87    0.77
   6  -5   0   10.82    0.81
   6  -5   0   11.14    0.83
  -6  -5   0   11.56    0.77
  -6  -5   0   10.65    0.67
  -6  -5   0   11.08    0.72
   6  -5   0   12.27    0.75
   6  -5   0   10.82    0.76
  -6  -5   0   10.37    0.66
  -6  -5   0   10.48    0.66
   6  -5   0   12.39    0.78
   6  -5   0   10.91    0.74
   6  -5   0   12.05    0.75
  -6  -5   0   12.14    0.77
  -6   5   0   11.04    0.69
  -6   5   0   11.01    0.76
  -6   5   0   11.82    0.77
  -6   5   0   11.32    0.77
  -6   5   0   12.76    0.82
  -6   5   0   13.13    0.75
  -6   5   0   10.03    0.82
  -6   5   0   11.45    0.75
  -6   5   0   11.08    0.67
  -6   5   0   13.00    0.77
  -6   5   0   12.17    0.83
  -7  -5   0   17.24    1.05
  -7  -5   0   16.12    0.95
   7  -5   0   17.77    1.03
  -7  -5   0   16.77    1.00
  -7  -5   0   16.40    0.96
   7  -5   0   16.09    1.02
  -7  -5   0   16.65    0.97
  -7  -5   0   14.69    1.07
   7  -5   0   16.74    1.07
   7  -5   0   18.53    1.13
  -7  -5   0   15.55    1.02
   7  -5   0   16.67    1.05
   7  -5   0   17.20    1.15
   7  -5   0   15.47    1.08
   7  -5   0   17.52    1.03
  -7  -5   0   16.28    1.06
   7  -5   0   16.02    1.05
  -7  -5   0   17.29    1.05
  -7  -5   0   15.88    1.06
  -7  -5   0   15.67    0.95
  -7   5   0   14.98    1.03
  -7   5   0   17.29    1.08
  -7   5   0   15.99    1.04
  -7   5   0   17.53    1.07
  -7   5   0   14.77    1.03
  -7   5   0   16.74    1.11
  -7   5   0   16.89    1.02
  -7   5   0   17.71    1.03
  -7   5   0   15.43    1.04
  -7   5   0   17.08    0.96
  -7   5   0   16.66    1.05
   8  -5   0    3.23    0.59
  -8  -5   0    3.83    0.44
   8  -5   0    3.82    0.47
  -8  -5   0    3.72    0.50
  -8  -5   0    4.29    0.38
  -8  -5   0    3.54    0.45
   8  -5   0    3.68    0.53
  -8  -5   0    3.60    0.38
  -8  -5   0    3.48    0.52
   8  -5   0    4.41    0.46
  -8  -5   0    3.44    0.30
  -8  -5   0    4.61    0.52
  -8  -5   0    3.80    0.31
   8  -5   0    3.88    0.47
   8  -5   0    2.13    0.58
   8  -5   0    3.85    0.55
  -8  -5   0    4.06    0.55
   8  -5   0    4.30    0.50
  -8  -5   0    3.94    0.40
  -8   5   0    4.25    0.53
  -8   5   0    4.16    0.49
  -8   5   0    4.31    0.49
  -8   5   0    3.77    0.47
  -8   5   0    3.95    0.54
  -8   5   0    2.99    0.41
  -8   5   0    4.06    0.33
  -8   5   0    3.75    0.44
  -8   5   0    4.32    0.59
  -8   5   0    3.71    0.48
  -8   5   0    3.44    0.39
  -9  -5   0    0.87    0.38
  -9  -5   0    0.30    0.21
  -9  -5   0    0.51    0.31
  -9  -5   0    0.43    0.33
  -9  -5   0    0.79    0.37
   9  -5   0    0.39    0.39
   9  -5   0    0.15    0.42
   9  -5   0    0.72    0.33
   9  -5   0    0.32    0.41
   9  -5   0    0.95    0.43
  -9  -5   0    0.72    0.27
   9  -5   0   -0.17    0.55
  -9  -5   0    0.15    0.29
  -9  -5   0    0.12    0.37
  -9  -5   0    0.61    0.22
   9  -5   0    0.67    0.42
   9  -5   0    0.67    0.36
  -9  -5   0    0.70    0.38
  -9  -5   0    0.37    0.42
   9  -5   0    1.36    0.59
  -9   5   0    0.15    0.21
  -9   5   0    0.64    0.71
  -9   5   0    1.60    0.56
  -9   5   0    0.50    0.36
  -9   5   0    0.10    0.40
  -9   5   0    0.28    0.48
  -9   5   0    1.12    0.34
  -9   5   0    1.00    0.29
  -9   5   0   -0.05    0.56
  -9   5   0    1.19    0.34
  -9   5   0    0.48    0.40
 -10  -5   0   11.97    0.93
 -10  -5   0   11.63    1.26
 -10  -5   0   11.93    0.88
  10  -5   0   12.22    0.96
  10  -5   0   13.81    1.02
 -10  -5   0   11.56    0.80
  10  -5   0   12.03    0.93
  10  -5   0   11.45    0.88
 -10  -5   0   12.04    0.85
  10  -5   0   12.32    0.94
  10  -5   0   13.20    1.10
  10  -5   0   14.63    0.96
 -10  -5   0   13.43    0.90
 -10  -5   0   12.03    0.93
  10  -5   0    9.44    1.07
 -10  -5   0   11.37    0.84
 -10  -5   0   12.80    0.96
 -10   5   0   13.02    0.99
 -10   5   0   13.16    0.98
 -10   5   0   12.08    0.94
 -10   5   0   11.92    0.98
 -10   5   0   11.89    0.85
 -10   5   0   12.03    0.99
 -10   5   0   10.56    1.00
 -10   5   0   12.28    0.79
 -10   5   0   11.38    1.00
 -10   5   0   12.67    0.86
  11  -5   0    1.85    0.57
  11  -5   0    1.47    0.77
 -11  -5   0    1.89    0.46
 -11  -5   0    1.92    0.47
 -11  -5   0    2.77    0.56
 -11  -5   0    2.10    0.35
 -11  -5   0    1.27    0.48
 -11  -5   0    1.84    0.51
  11  -5   0    2.12    0.44
 -11  -5   0    2.46    0.47
  11  -5   0    1.96    0.55
 -11  -5   0    1.97    0.56
  11  -5   0    2.58    0.81
  11  -5   0    1.03    0.46
 -11  -5   0    2.17    0.44
 -11  -5   0    2.15    0.35
  11  -5   0    2.28    0.53
  11  -5   0    1.84    0.57
 -11  -5   0    2.22    0.34
  11  -5   0    0.84    0.54
 -11   5   0    2.38    0.44
 -11   5   0    1.78    0.35
 -11   5   0    2.12    0.54
 -11   5   0    2.66    0.51
 -11   5   0    2.21    0.70
 -11   5   0    1.05    0.55
 -11   5   0    1.31    0.62
 -11   5   0    1.86    0.58
 -11   5   0    1.62    0.53
 -11   5   0    2.03    0.43
 -11   5   0    1.78    0.68
 -12  -5   0   -0.20    0.42
  12  -5   0    0.65    1.03
 -12  -5   0    0.51    0.53
 -12  -5   0    0.59    0.58
 -12  -5   0    0.16    0.35
 -12  -5   0    0.24    0.37
  12  -5   0    0.76    0.91
 -12  -5   0    0.61    0.68
  12  -5   0    0.69    0.55
 -12  -5   0    0.08    0.38
  12  -5   0   -0.11    0.88
 -12  -5   0   -0.14    0.52
 -12  -5   0    0.00    0.53
  12  -5   0    0.36    0.48
  12  -5   0    0.27    0.65
  12  -5   0    1.07    0.55
 -12  -5   0    0.29    0.57
 -12  -5   0   -0.17    0.51
 -12   5   0    0.60    0.48
 -12   5   0   -0.67    0.50
 -12   5   0    0.27    0.69
 -12   5   0    0.93    0.45
 -12   5   0    0.18    0.61
 -12   5   0   -0.28    0.62
 -12   5   0   -0.53    0.73
 -12   5   0    0.04    0.62
 -12   5   0    0.22    0.57
 -12   5   0    0.08    0.35
 -12   5   0    1.16    0.77
 -13  -5   0    0.48    0.38
  13  -5   0    0.04    0.67
  13  -5   0    0.41    0.66
  13  -5   0   -0.19    0.62
  13  -5   0   -0.44    1.04
 -13  -5   0   -0.32    0.61
  13  -5   0   -0.17    0.64
 -13  -5   0   -0.18    0.66
 -13  -5   0   -0.13    0.45
 -13  -5   0    0.02    0.46
 -13  -5   0   -0.10    0.58
  13  -5   0    0.16    0.56
 -13  -5   0   -0.38    0.64
 -13  -5   0    0.07    0.46
  13  -5   0    0.12    0.81
 -13  -5   0   -0.30    0.71
  13  -5   0    0.02    1.01
 -13  -5   0   -0.53    0.66
 -13  -5   0   -0.36    0.63
  13  -5   0   -0.40    0.71
 -13   5   0   -0.88    0.73
 -13   5   0   -0.08    0.60
 -13   5   0   -1.03    0.74
 -13   5   0    0.19    0.51
 -13   5   0   -0.18    0.72
 -13   5   0    0.17    0.99
 -13   5   0   -0.37    0.44
 -13   5   0   -0.28    0.76
 -13   5   0    0.22    0.97
 -13   5   0   -0.30    0.64
 -13   5   0   -0.13    0.56
  14  -5   0    2.15    1.27
  14  -5   0    3.53    0.73
 -14  -5   0    2.61    0.60
  14  -5   0    2.70    0.83
 -14  -5   0    2.92    0.76
  14  -5   0    2.62    1.24
 -14  -5   0    1.39    0.88
 -14  -5   0    2.90    0.78
  14  -5   0    2.42    0.78
  14  -5   0    3.02    0.82
 -14  -5   0    2.88    0.86
  14  -5   0    2.97    0.88
  14  -5   0    3.57    0.73
 -14  -5   0    2.56    0.51
 -14  -5   0    2.86    0.82
  14  -5   0    3.07    1.01
 -14  -5   0    3.22    0.47
 -14  -5   0    3.21    0.83
 -14  -5   0    3.55    0.62
 -14  -5   0    2.44    0.79
 -14  -5   0    2.81    0.74
 -14   5   0    3.34    1.08
 -14   5   0    4.43    0.94
 -14   5   0    2.88    0.56
 -14   5   0    2.23    1.04
 -14   5   0    3.04    0.92
 -14   5   0    2.67    1.03
 -14   5   0    1.22    0.86
 -14   5   0    1.76    1.05
 -14   5   0    2.94    0.71
 -14   5   0    2.21    0.78
 -14   5   0    3.58    0.64
   0  -6   0    6.14    0.44
   0  -6   0    5.49    0.44
   0  -6   0    6.47    0.44
   0  -6   0    5.74    0.46
   0  -6   0    5.81    0.41
   0  -6   0    5.89    0.40
   0  -6   0    6.63    0.40
   0  -6   0    5.38    0.42
   0  -6   0    5.52    0.57
   0  -6   0    5.39    0.35
   0   6   0    5.79    0.40
   0   6   0    5.71    0.39
   0   6   0    4.94    0.43
   0   6   0    5.23    0.39
   0   6   0    5.37    0.47
   0   6   0    6.14    0.39
   0   6   0    5.94    0.39
   1  -6   0   16.75    1.02
  -1  -6   0   16.78    1.02
   1  -6   0   17.33    1.05
   1  -6   0   17.70    1.03
  -1  -6   0   16.45    1.03
  -1  -6   0   17.10    1.02
  -1  -6   0   18.21    1.12
   1  -6   0   17.99    1.02
  -1  -6   0   18.09    1.06
  -1  -6   0   17.50    1.00
   1  -6   0   18.31    1.05
  -1  -6   0   17.21    1.00
   1  -6   0   16.76    1.03
   1  -6   0   16.98    1.12
  -1  -6   0   17.54    1.04
   1  -6   0   17.34    1.05
  -1  -6   0   17.35    1.02
  -1  -6   0   17.71    1.00
   1  -6   0   18.36    1.05
   1   6   0   17.02    0.99
  -1   6   0   17.82    1.03
  -1   6   0   17.66    1.03
  -1   6   0   16.05    1.04
  -1   6   0   17.36    1.01
   1   6   0   16.74    1.04
   1   6   0   17.07    0.99
   1   6   0   18.30    1.07
  -1   6   0   15.98    1.04
  -1   6   0   16.07    1.06
   1   6   0   17.54    1.02
  -1   6   0   16.50    1.01
  -1   6   0   17.97    1.03
  -2  -6   0   62.18    3.36
   2  -6   0   61.85    3.39
  -2  -6   0   58.91    3.39
   2  -6   0   59.53    3.35
   2  -6   0   59.85    3.35
  -2  -6   0   60.56    3.31
  -2  -6   0   59.64    3.32
   2  -6   0   57.11    3.33
   2  -6   0   58.58    3.34
  -2  -6   0   60.49    3.32
  -2  -6   0   59.84    3.32
  -2  -6   0   58.61    3.31
  -2  -6   0   59.61    3.33
   2  -6   0   60.18    3.34
  -2  -6   0   60.35    3.34
   2  -6   0   57.66    3.33
  -2  -6   0   58.32    3.33
   2  -6   0   64.03    3.36
   2  -6   0   61.14    3.35
   2   6   0   53.21    3.29
   2   6   0   54.20    3.30
  -2   6   0   57.03    3.33
   2   6   0   54.50    3.30
  -2   6   0   59.90    3.35
  -2   6   0   58.67    3.34
  -2   6   0   56.94    3.33
  -2   6   0   60.60    3.35
  -2   6   0   58.58    3.33
  -2   6   0   55.93    3.33
  -2   6   0   59.94    3.36
   2   6   0   54.17    3.30
  -3  -6   0    2.04    0.23
  -3  -6   0    2.24    0.28
   3  -6   0    1.41    0.38
   3  -6   0    1.97    0.25
  -3  -6   0    1.87    0.19
   3  -6   0    2.02    0.29
   3  -6   0    1.56    0.25
   3  -6   0    1.56    0.25
  -3  -6   0    2.11    0.34
  -3  -6   0    2.68    0.29
   3  -6   0    2.15    0.30
   3  -6   0    3.08    0.37
  -3  -6   0    1.73    0.25
  -3  -6   0    2.01    0.22
   3  -6   0    2.29    0.31
  -3  -6   0    1.95    0.24
  -3  -6   0    2.26    0.19
   3  -6   0    1.90    0.34
  -3   6   0    1.52    0.27
  -3   6   0    2.44    0.36
  -3   6   0    2.25    0.28
  -3   6   0    2.95    0.31
   4  -6   0    6.01    0.45
   4  -6   0    4.84    0.56
   4  -6   0    4.52    0.43
   4  -6   0    5.06    0.42
  -4  -6   0    4.99    0.43
  -4  -6   0    5.05    0.32
   4  -6   0    4.60    0.52
   4  -6   0    5.56    0.46
   4  -6   0    5.11    0.41
  -4  -6   0    5.22    0.49
  -4  -6   0    4.92    0.32
  -4  -6   0    4.57    0.39
   4  -6   0    4.56    0.51
   4  -6   0    5.72    0.45
  -4  -6   0    5.03    0.38
  -4  -6   0    4.80    0.41
  -4   6   0    5.13    0.44
  -4   6   0    4.39    0.44
  -4   6   0    4.83    0.46
  -4   6   0    4.32    0.46
  -4   6   0    4.97    0.44
  -4   6   0    4.66    0.45
  -4   6   0    5.04    0.41
  -4   6   0    4.63    0.45
   5  -6   0   20.80    1.33
  -5  -6   0   21.61    1.24
  -5  -6   0   22.36    1.25
  -5  -6   0   21.85    1.27
  -5  -6   0   20.78    1.18
  -5  -6   0   19.83    1.26
   5  -6   0   21.57    1.26
  -5  -6   0   21.04    1.23
  -5  -6   0   19.41    1.19
  -5  -6   0   21.18    1.31
   5  -6   0   21.77    1.27
   5  -6   0   21.57    1.28
   5  -6   0   21.55    1.34
   5  -6   0   20.87    1.27
  -5  -6   0   20.83    1.18
  -5  -6   0   19.20    1.19
  -5  -6   0   21.04    1.25
   5  -6   0   20.64    1.26
  -5  -6   0   20.62    1.29
   5  -6   0   20.96    1.26
   5  -6   0   23.69    1.35
  -5   6   0   20.64    1.25
  -5   6   0   22.06    1.27
  -5   6   0   20.12    1.33
  -5   6   0   21.28    1.29
  -5   6   0   21.14    1.30
  -5   6   0   21.16    1.27
  -5   6   0   20.36    1.27
  -5   6   0   20.01    1.18
  -5   6   0   20.82    1.28
  -5   6   0   19.96    1.26
  -5   6   0   19.67    1.18
  -6  -6   0    0.95    0.31
   6  -6   0    1.38    0.28
  -6  -6   0    1.04    0.13
   6  -6   0    1.20    0.28
  -6  -6   0    0.78    0.31
   6  -6   0    1.76    0.47
  -6  -6   0    0.81    0.26
  -6  -6   0    0.87    0.11
  -6  -6   0    1.25    0.16
   6  -6   0    1.41    0.42
  -6  -6   0    1.39    0.35
  -6  -6   0    0.75    0.32
  -6  -6   0    1.11    0.30
   6  -6   0    1.17    0.30
  -6  -6   0    1.14    0.16
   6  -6   0    1.05    0.45
  -6   6   0    1.27    0.15
  -6   6   0    0.93    0.39
  -6   6   0    1.33    0.32
  -6   6   0    1.61    0.32
  -6   6   0    0.87    0.16
  -6   6   0    1.65    0.36
  -6   6   0    1.50    0.44
  -6   6   0    1.06    0.33
  -6   6   0    1.75    0.28
  -6   6   0    0.73    0.38
  -6   6   0    2.13    0.49
   7  -6   0   -0.02    0.32
  -7  -6   0    0.07    0.11
  -7  -6   0    0.22    0.25
  -7  -6   0    0.20    0.32
  -7  -6   0   -0.13    0.30
  -7  -6   0   -0.19    0.28
   7  -6   0    0.00    0.33
   7  -6   0   -0.05    0.29
  -7  -6   0   -0.36    0.35
   7  -6   0    0.04    0.54
   7  -6   0   -0.09    0.33
  -7  -6   0    0.02    0.18
  -7  -6   0   -0.47    0.32
   7  -6   0   -0.66    0.54
  -7  -6   0   -0.27    0.39
   7  -6   0    0.18    0.32
  -7  -6   0    0.33    0.18
   7  -6   0   -0.30    0.33
  -7  -6   0    0.03    0.11
   7  -6   0    0.42    0.43
  -7   6   0   -0.53    0.46
  -7   6   0    0.12    0.15
  -7   6   0    0.25    0.37
  -7   6   0    0.09    0.18
  -7   6   0    0.03    0.49
  -7   6   0   -0.26    0.46
  -7   6   0   -0.22    0.34
  -7   6   0    0.30    0.28
  -7   6   0    0.48    0.40
  -7   6   0    0.44    0.29
  -7   6   0    0.23    0.35
   8  -6   0    1.13    0.39
  -8  -6   0    0.55    0.39
  -8  -6   0    0.93    0.29
  -8  -6   0    0.75    0.37
  -8  -6   0    1.01    0.23
   8  -6   0    1.10    0.40
   8  -6   0    0.83    0.31
  -8  -6   0    1.26    0.24
  -8  -6   0    0.99    0.17
  -8  -6   0    1.03    0.16
  -8  -6   0    0.66    0.41
   8  -6   0    0.54    0.59
   8  -6   0    0.74    0.38
  -8  -6   0    1.69    0.39
   8  -6   0    0.64    0.58
   8  -6   0    1.01    0.39
   8  -6   0    0.88    0.34
   8  -6   0    0.32    0.45
  -8  -6   0    0.70    0.45
  -8  -6   0    0.38    0.38
  -8   6   0    0.83    0.19
  -8   6   0    1.25    0.50
  -8   6   0    1.11    0.25
  -8   6   0    0.79    0.48
  -8   6   0    0.83    0.36
  -8   6   0    0.96    0.34
  -8   6   0    1.01    0.49
  -8   6   0    1.23    0.35
  -8   6   0    0.94    0.42
  -8   6   0    0.38    0.41
  -8   6   0    1.29    0.36
   9  -6   0    1.02    0.45
  -9  -6   0    0.68    0.44
   9  -6   0    1.63    0.46
  -9  -6   0    1.22    0.21
  -9  -6   0    1.84    0.22
   9  -6   0    1.21    0.38
  -9  -6   0    0.92    0.33
   9  -6   0    0.62    0.38
   9  -6   0    1.05    0.45
  -9  -6   0    1.26    0.40
  -9  -6   0    1.13    0.43
  -9  -6   0    1.49    0.29
  -9  -6   0    1.16    0.29
  -9  -6   0    1.29    0.45
   9  -6   0    0.47    0.51
   9  -6   0    1.44    0.68
   9  -6   0    0.61    0.65
  -9  -6   0    1.60    0.49
   9  -6   0    0.76    0.41
  -9  -6   0    0.74    0.40
  -9   6   0    1.35    0.57
  -9   6   0    0.77    0.30
  -9   6   0    1.03    0.38
  -9   6   0    0.53    0.51
  -9   6   0    0.63    0.55
  -9   6   0    1.52    0.52
  -9   6   0    1.13    0.24
  -9   6   0    1.26    0.60
  -9   6   0    1.15    0.52
  -9   6   0    1.29    0.40
  -9   6   0    0.99    0.39
  10  -6   0    0.57    0.50
 -10  -6   0    0.79    0.25
 -10  -6   0   -0.14    0.46
 -10  -6   0   -0.30    0.41
 -10  -6   0    0.67    0.50
  10  -6   0    0.84    0.50
  10  -6   0   -0.22    0.76
  10  -6   0    0.53    0.78
  10  -6   0    0.84    0.81
 -10  -6   0    0.41    0.35
  10  -6   0    0.67    0.54
  10  -6   0    0.09    0.53
 -10  -6   0    0.68    0.25
 -10  -6   0    0.75    0.35
  10  -6   0    0.17    0.61
 -10  -6   0    0.58    0.48
 -10  -6   0    0.41    0.54
 -10  -6   0    1.16    0.36
 -10  -6   0    0.20    0.50
  10  -6   0   -0.05    0.41
 -10   6   0    0.26    0.54
 -10   6   0    0.39    0.40
 -10   6   0    0.64    0.34
 -10   6   0    0.61    0.64
 -10   6   0    0.29    0.42
 -10   6   0    0.30    0.62
 -10   6   0    1.06    0.70
 -10   6   0    0.12    0.70
 -10   6   0    0.62    0.50
 -10   6   0    0.20    0.53
 -10   6   0    0.51    0.26
  11  -6   0    2.45    0.88
 -11  -6   0    1.75    0.60
 -11  -6   0    1.98    0.52
 -11  -6   0    2.12    0.46
  11  -6   0    2.37    0.60
  11  -6   0    1.78    0.56
 -11  -6   0    2.25    0.58
  11  -6   0    1.68    0.89
 -11  -6   0    2.34    0.35
 -11  -6   0    2.87    0.59
 -11  -6   0    2.67    0.43
 -11  -6   0    1.43    0.53
  11  -6   0    2.55    0.53
  11  -6   0    1.94    0.63
 -11  -6   0    3.17    0.55
 -11  -6   0    2.50    0.46
  11  -6   0    2.82    0.62
  11  -6   0    2.32    0.63
  11  -6   0    2.41    0.59
 -11  -6   0    2.61    0.35
 -11   6   0    3.61    0.78
 -11   6   0    2.80    0.60
 -11   6   0    3.13    0.76
 -11   6   0    2.35    0.62
 -11   6   0    2.65    0.44
 -11   6   0    2.08    0.54
 -11   6   0    3.00    0.68
 -11   6   0    2.39    0.67
 -11   6   0    2.96    0.51
 -11   6   0    2.85    0.37
 -11   6   0    2.49    0.75
 -12  -6   0    0.26    0.59
  12  -6   0    1.66    1.02
  12  -6   0    1.50    0.68
 -12  -6   0    0.86    0.70
 -12  -6   0    0.67    0.58
  12  -6   0    0.25    1.02
 -12  -6   0    1.25    0.38
 -12  -6   0    1.34    0.55
  12  -6   0    0.96    0.72
 -12  -6   0    0.21    0.61
 -12  -6   0    1.47    0.43
 -12  -6   0    1.16    0.53
 -12  -6   0    1.44    0.69
 -12  -6   0    0.79    0.38
  12  -6   0    1.16    0.66
  12  -6   0    0.55    0.65
 -12  -6   0    0.68    0.51
  12  -6   0    0.79    0.55
 -12   6   0    1.48    0.77
 -12   6   0    0.81    0.84
 -12   6   0    1.18    0.74
 -12   6   0    1.24    0.48
 -12   6   0    0.18    0.81
 -12   6   0    1.65    0.66
 -12   6   0    1.43    0.54
 -12   6   0    1.84    0.68
 -12   6   0    1.00    0.59
 -12   6   0    0.83    0.73
 -12   6   0    1.27    0.39
  13  -6   0    2.31    0.73
 -13  -6   0    0.57    0.74
 -13  -6   0    0.61    0.69
  13  -6   0    0.68    0.76
  13  -6   0    1.20    0.64
 -13  -6   0    1.17    0.48
 -13  -6   0    0.25    0.58
 -13  -6   0    0.52    0.75
 -13  -6   0    0.77    0.73
  13  -6   0    0.89    1.17
 -13  -6   0    0.07    0.46
  13  -6   0    1.64    1.22
  13  -6   0    1.15    0.77
  13  -6   0   -0.03    0.73
  13  -6   0    0.85    0.81
 -13  -6   0    0.46    0.61
 -13  -6   0    0.99    0.58
 -13  -6   0    1.35    0.85
  13  -6   0   -0.02    0.81
 -13  -6   0    1.74    0.46
 -13   6   0    0.83    0.44
 -13   6   0    1.17    0.61
 -13   6   0    1.53    1.00
 -13   6   0    0.65    0.79
 -13   6   0    0.90    0.57
 -13   6   0   -0.07    0.68
 -13   6   0    0.71    0.85
 -13   6   0   -0.05    0.97
 -13   6   0    1.93    0.85
 -13   6   0    0.08    0.86
 -13   6   0    1.49    0.86
   0  -7   0    0.55    0.20
   0  -7   0    0.16    0.19
   0  -7   0    0.27    0.18
   0  -7   0    0.57    0.21
   0  -7   0    0.42    0.10
   0  -7   0    0.18    0.26
   0  -7   0   -0.03    0.28
   0  -7   0    0.61    0.29
   0  -7   0    0.61    0.27
   0  -7   0    0.04    0.45
   0   7   0    0.73    0.19
   0   7   0    0.18    0.18
   0   7   0    0.10    0.18
   0   7   0    0.53    0.18
   0   7   0    0.21    0.23
   0   7   0    0.16    0.29
   0   7   0    0.29    0.18
  -1  -7   0    0.19    0.27
  -1  -7   0    0.42    0.14
  -1  -7   0    0.29    0.27
  -1  -7   0    0.35    0.28
   1  -7   0   -0.30    0.41
   1  -7   0    0.45    0.23
  -1  -7   0    0.90    0.19
  -1  -7   0    0.55    0.42
  -1  -7   0    0.85    0.20
   1  -7   0    0.64    0.22
  -1  -7   0    0.57    0.21
   1  -7   0    0.70    0.24
   1  -7   0    0.65    0.24
   1  -7   0    0.86    0.21
   1  -7   0    0.62    0.22
   1  -7   0    0.19    0.32
  -1  -7   0    0.78    0.43
   1  -7   0    0.43    0.31
  -1  -7   0    0.63    0.18
   1   7   0    0.23    0.15
   1   7   0    0.82    0.21
  -1   7   0    0.86    0.25
  -1   7   0    0.40    0.22
  -1   7   0    0.55    0.22
  -1   7   0    0.66    0.22
  -1   7   0    0.76    0.30
   1   7   0    0.56    0.16
   1   7   0    0.55    0.15
  -1   7   0    0.58    0.21
  -1   7   0    0.60    0.22
   1   7   0    0.51    0.16
   1   7   0    0.35    0.30
  -2  -7   0    0.57    0.20
  -2  -7   0    0.23    0.24
   2  -7   0    0.69    0.23
   2  -7   0    0.97    0.23
   2  -7   0   -0.31    0.36
   2  -7   0    1.19    0.28
  -2  -7   0    0.24    0.24
  -2  -7   0    0.86    0.28
  -2  -7   0    1.00    0.23
   2  -7   0    0.66    0.45
   2  -7   0    0.58    0.22
  -2  -7   0    0.44    0.27
   2  -7   0    1.07    0.25
   2  -7   0    0.86    0.23
   2  -7   0    0.70    0.37
  -2  -7   0    0.61    0.43
   2   7   0    0.54    0.10
  -2   7   0    0.70    0.26
   2   7   0    0.69    0.09
  -2   7   0    0.59    0.30
   2   7   0    0.56    0.10
  -2   7   0    0.46    0.24
  -2   7   0    0.85    0.25
  -2   7   0    1.11    0.28
  -2   7   0    0.77    0.22
   2   7   0    0.51    0.09
  -2   7   0    0.45    0.26
  -2   7   0    0.86    0.29
   3  -7   0    1.41    0.43
   3  -7   0    1.68    0.29
  -3  -7   0    2.05    0.25
  -3  -7   0    1.71    0.31
  -3  -7   0    1.84    0.19
   3  -7   0    0.87    0.26
   3  -7   0    1.95    0.28
  -3  -7   0    2.31    0.55
  -3  -7   0    1.30    0.23
   3  -7   0    1.71    0.39
   3  -7   0    2.08    0.31
   3  -7   0    1.75    0.31
   3  -7   0    1.52    0.39
  -3  -7   0    1.72    0.32
   3  -7   0    1.38    0.32
  -3  -7   0    1.28    0.24
  -3  -7   0    1.72    0.24
  -3  -7   0    1.22    0.23
  -3  -7   0    1.62    0.19
  -3   7   0    2.29    0.28
  -3   7   0    1.40    0.29
  -3   7   0    1.68    0.34
  -3   7   0    1.33    0.32
  -3   7   0    1.51    0.29
  -3   7   0    2.02    0.33
  -3   7   0    1.32    0.30
  -3   7   0    1.16    0.33
  -4  -7   0    0.80    0.33
  -4  -7   0    0.83    0.15
  -4  -7   0    0.61    0.22
  -4  -7   0    0.54    0.19
   4  -7   0    0.50    0.48
  -4  -7   0    0.48    0.14
   4  -7   0    0.60    0.27
   4  -7   0    0.11    0.30
   4  -7   0   -0.36    0.40
  -4  -7   0    0.81    0.25
   4  -7   0   -0.11    0.30
  -4  -7   0    0.48    0.28
   4  -7   0   -0.06    0.46
   4  -7   0    0.42    0.27
   4  -7   0   -0.96    0.43
  -4  -7   0    0.17    0.23
  -4  -7   0    0.61    0.19
   4  -7   0    0.42    0.29
  -4   7   0    0.30    0.28
  -4   7   0    0.66    0.30
  -4   7   0    0.68    0.24
  -4   7   0    0.14    0.30
  -4   7   0    0.70    0.31
  -4   7   0    0.61    0.31
  -5  -7   0    5.10    0.33
   5  -7   0    5.25    0.51
   5  -7   0    5.32    0.62
   5  -7   0    4.98    0.51
   5  -7   0    4.98    0.69
  -5  -7   0    5.63    0.49
   5  -7   0    5.21    0.50
   5  -7   0    4.55    0.54
  -5  -7   0    3.90    0.57
   5  -7   0    4.55    0.60
  -5  -7   0    5.16    0.48
  -5  -7   0    5.47    0.43
   5  -7   0    4.21    0.48
   5  -7   0    5.14    0.48
  -5  -7   0    5.37    0.45
  -5  -7   0    3.95    0.51
  -5  -7   0    4.71    0.32
  -5   7   0    4.46    0.54
  -5   7   0    4.98    0.52
  -5   7   0    5.13    0.47
  -5   7   0    5.28    0.53
  -5   7   0    4.33    0.48
  -5   7   0    4.80    0.49
  -6  -7   0    0.14    0.14
   6  -7   0   -0.17    0.33
  -6  -7   0    0.25    0.36
   6  -7   0    1.21    0.53
  -6  -7   0   -0.04    0.44
   6  -7   0    0.34    0.34
  -6  -7   0   -0.11    0.25
  -6  -7   0    0.00    0.13
   6  -7   0   -0.35    0.50
   6  -7   0    0.01    0.29
   6  -7   0    0.22    0.32
  -6  -7   0   -0.40    0.31
  -6  -7   0    0.33    0.31
   6  -7   0    0.28    0.38
  -6  -7   0   -0.31    0.36
  -6  -7   0    0.06    0.35
  -6  -7   0    0.17    0.24
   6  -7   0   -0.05    0.34
   6  -7   0   -0.18    0.46
  -6   7   0    0.11    0.31
  -6   7   0   -0.68    0.35
  -6   7   0    0.09    0.28
  -6   7   0   -0.20    0.34
  -6   7   0    0.11    0.09
  -6   7   0    0.06    0.08
  -6   7   0    1.05    0.43
  -6   7   0   -0.17    0.36
  -6   7   0    0.05    0.41
  -6   7   0    0.11    0.33
  -7  -7   0    3.96    0.50
  -7  -7   0    3.97    0.57
   7  -7   0    3.28    0.47
   7  -7   0    3.17    0.59
   7  -7   0    4.61    0.54
  -7  -7   0    3.54    0.50
  -7  -7   0    4.21    0.55
  -7  -7   0    3.86    0.29
  -7  -7   0    3.23    0.49
   7  -7   0    4.65    0.50
   7  -7   0    4.23    0.65
  -7  -7   0    4.10    0.45
  -7  -7   0    3.99    0.26
   7  -7   0    3.37    0.48
   7  -7   0    3.16    0.43
  -7  -7   0    3.75    0.29
   7  -7   0    3.81    0.52
  -7  -7   0    3.86    0.47
  -7  -7   0    3.96    0.26
  -7  -7   0    3.76    0.50
   7  -7   0    3.06    0.64
  -7   7   0    4.31    0.48
  -7   7   0    3.40    0.62
  -7   7   0    3.85    0.62
  -7   7   0    4.39    0.31
  -7   7   0    5.06    0.53
  -7   7   0    4.44    0.57
  -7   7   0    4.95    0.63
  -7   7   0    4.45    0.54
  -7   7   0    4.25    0.58
  -7   7   0    4.13    0.28
  -7   7   0    5.42    0.61
  -8  -7   0    9.56    0.84
  -8  -7   0    7.79    0.76
   8  -7   0    9.58    0.74
  -8  -7   0    8.05    0.80
  -8  -7   0    8.11    0.50
  -8  -7   0    8.23    0.50
   8  -7   0    9.34    0.75
  -8  -7   0    7.49    0.69
   8  -7   0    7.54    0.86
  -8  -7   0    9.01    0.91
   8  -7   0    8.10    0.83
   8  -7   0    8.32    0.78
  -8  -7   0    8.65    0.54
  -8  -7   0    8.79    0.74
  -8  -7   0    8.39    0.54
  -8  -7   0    9.18    0.85
   8  -7   0    7.88    0.95
   8  -7   0    6.46    0.88
   8  -7   0    9.81    0.77
  -8  -7   0    8.94    0.76
   8  -7   0    8.45    0.74
  -8   7   0    8.84    0.56
  -8   7   0    7.12    0.90
  -8   7   0    9.91    0.74
  -8   7   0    7.89    0.72
  -8   7   0    8.43    0.77
  -8   7   0   10.92    0.92
  -8   7   0    9.32    0.83
  -8   7   0    8.79    0.76
  -8   7   0    7.59    0.81
  -8   7   0    7.23    0.82
  -9  -7   0   10.03    0.85
  -9  -7   0   10.56    0.99
   9  -7   0    9.51    1.06
  -9  -7   0    9.27    0.91
  -9  -7   0   10.63    0.76
  -9  -7   0   10.39    0.64
   9  -7   0   11.57    0.88
   9  -7   0   10.02    0.86
  -9  -7   0    9.88    0.90
   9  -7   0   11.37    0.86
   9  -7   0    9.05    0.95
   9  -7   0    7.68    0.93
   9  -7   0    8.70    1.09
   9  -7   0    9.61    0.88
  -9  -7   0    8.46    0.64
  -9  -7   0   10.52    1.23
   9  -7   0   12.25    0.85
  -9  -7   0    8.38    0.85
  -9   7   0   10.30    0.83
  -9   7   0    9.24    0.89
  -9   7   0    9.35    0.95
  -9   7   0    8.34    1.01
  -9   7   0   10.07    0.95
  -9   7   0   10.94    0.83
  -9   7   0    9.68    0.63
  -9   7   0    8.33    0.94
  -9   7   0   10.08    0.67
  -9   7   0    9.81    0.89
  -9   7   0    9.24    0.95
  10  -7   0    5.03    0.96
 -10  -7   0    5.79    0.61
  10  -7   0    4.07    0.75
  10  -7   0    4.03    0.74
 -10  -7   0    5.80    0.73
  10  -7   0    4.96    0.63
 -10  -7   0    4.42    0.67
  10  -7   0    5.70    0.68
  10  -7   0    6.13    0.80
 -10  -7   0    4.60    0.67
  10  -7   0    3.98    0.66
 -10  -7   0    4.67    0.63
  10  -7   0    2.76    0.95
 -10  -7   0    6.08    0.72
 -10  -7   0    5.24    0.50
 -10  -7   0    5.80    0.39
 -10  -7   0    5.90    0.40
  10  -7   0    7.67    0.77
 -10  -7   0    4.38    0.49
 -10  -7   0    5.40    0.73
 -10   7   0    6.62    0.75
 -10   7   0    6.89    0.83
 -10   7   0    5.17    0.73
 -10   7   0    3.93    0.79
 -10   7   0    4.88    0.53
 -10   7   0    5.26    0.46
 -10   7   0    4.96    0.81
 -10   7   0    4.10    0.66
 -10   7   0    4.76    0.72
 -10   7   0    7.04    0.72
 -10   7   0    4.13    0.68
  11  -7   0    2.47    1.02
  11  -7   0    3.69    0.70
 -11  -7   0    2.00    0.64
  11  -7   0    1.73    0.63
 -11  -7   0    2.02    0.60
 -11  -7   0    3.04    0.36
  11  -7   0    2.88    0.69
 -11  -7   0    3.06    0.67
 -11  -7   0    3.54    0.49
 -11  -7   0    2.63    0.66
  11  -7   0    1.37    0.62
  11  -7   0    2.56    0.67
  11  -7   0    2.23    1.04
 -11  -7   0    2.54    0.41
  11  -7   0    2.57    0.74
 -11  -7   0    2.91    0.43
 -11  -7   0    3.28    0.73
 -11  -7   0    1.83    0.73
  11  -7   0    3.36    0.62
 -11  -7   0    2.64    0.32
 -11   7   0    3.16    0.77
 -11   7   0    2.52    0.73
 -11   7   0    2.38    0.75
 -11   7   0    3.64    0.95
 -11   7   0    2.09    0.66
 -11   7   0    2.28    0.84
 -11   7   0    3.52    0.61
 -11   7   0    2.13    0.36
 -11   7   0    2.61    0.45
 -11   7   0    3.54    0.61
 -11   7   0    2.54    0.94
  12  -7   0    4.04    1.33
  12  -7   0    3.92    0.86
  12  -7   0    4.25    0.80
 -12  -7   0    3.99    0.60
  12  -7   0    3.77    0.81
 -12  -7   0    4.58    0.74
  12  -7   0    3.35    0.78
  12  -7   0    3.64    0.86
 -12  -7   0    5.17    0.47
  12  -7   0    3.60    1.36
 -12  -7   0    4.97    0.47
 -12  -7   0    3.87    0.81
 -12  -7   0    4.83    0.78
 -12  -7   0    2.95    0.96
 -12  -7   0    3.17    0.77
 -12  -7   0    3.28    0.80
 -12   7   0    6.02    0.91
 -12   7   0    5.92    0.90
 -12   7   0    2.80    0.77
 -12   7   0    5.33    0.55
 -12   7   0    3.94    0.56
 -12   7   0    6.16    1.74
 -12   7   0    3.23    1.02
 -12   7   0    3.06    1.00
 -12   7   0    3.26    0.70
 -12   7   0    4.02    0.84
 -12   7   0    4.45    0.90
   0  -8   0   12.81    0.82
   0  -8   0   14.37    0.94
   0  -8   0   15.51    0.90
   0  -8   0   14.63    0.92
   0  -8   0   14.16    0.94
   0  -8   0   14.45    0.89
   0  -8   0   15.74    0.96
   0  -8   0   14.33    0.82
   0  -8   0   13.72    0.88
   0  -8   0   14.50    0.93
   0   8   0   13.89    0.89
   0   8   0   14.13    0.87
   0   8   0   15.57    0.99
   0   8   0   13.57    0.94
   0   8   0   13.89    0.87
   0   8   0   14.19    0.86
   0   8   0   13.53    0.86
  -1  -8   0   17.23    0.98
  -1  -8   0   16.95    1.07
   1  -8   0   17.12    1.09
  -1  -8   0   15.61    1.01
  -1  -8   0   14.51    1.22
   1  -8   0   18.71    1.05
   1  -8   0   14.99    1.09
   1  -8   0   17.42    1.03
  -1  -8   0   17.28    1.03
   1  -8   0   18.08    1.06
  -1  -8   0   18.25    1.05
   1  -8   0   15.07    1.21
  -1  -8   0   15.99    1.05
  -1  -8   0   15.90    0.98
   1  -8   0   15.68    1.09
  -1  -8   0   16.50    1.06
   1  -8   0   16.15    1.03
  -1  -8   0   17.37    1.01
  -1  -8   0   15.52    1.10
   1  -8   0   17.51    1.08
  -1   8   0   17.37    1.08
   1   8   0   16.97    0.99
  -1   8   0   17.72    1.02
  -1   8   0   17.11    1.11
  -1   8   0   17.12    1.04
   1   8   0   17.02    0.99
   1   8   0   17.11    1.12
   1   8   0   17.30    0.99
  -1   8   0   17.04    1.02
  -1   8   0   17.24    1.02
   1   8   0   17.14    0.99
  -1   8   0   16.31    1.02
   2  -8   0    0.49    0.25
  -2  -8   0   -0.25    0.30
   2  -8   0    0.11    0.27
  -2  -8   0    0.55    0.36
  -2  -8   0    1.07    0.27
   2  -8   0    0.06    0.38
   2  -8   0    0.37    0.50
  -2  -8   0    0.04    0.21
   2  -8   0    0.31    0.27
   2  -8   0   -0.04    0.38
  -2  -8   0    0.49    0.23
  -2  -8   0    0.31    0.22
   2  -8   0    0.04    0.27
  -2  -8   0    0.06    0.18
  -2  -8   0    0.24    0.49
   2  -8   0    0.26    0.31
   2  -8   0    0.21    0.30
  -2  -8   0    0.44    0.33
  -2  -8   0   -0.27    0.31
  -2   8   0    0.50    0.28
  -2   8   0    0.76    0.34
  -2   8   0    0.48    0.25
  -2   8   0    0.29    0.29
  -2   8   0    0.17    0.27
  -2   8   0    0.33    0.29
  -2   8   0    1.11    0.34
  -3  -8   0    1.66    0.32
   3  -8   0    1.90    0.39
   3  -8   0    1.80    0.36
   3  -8   0    1.75    0.32
  -3  -8   0    1.97    0.31
   3  -8   0    1.38    0.57
  -3  -8   0    2.41    0.34
  -3  -8   0    1.35    0.62
  -3  -8   0    1.72    0.24
  -3  -8   0    1.48    0.38
   3  -8   0    2.03    0.41
  -3  -8   0    2.15    0.38
  -3  -8   0    1.62    0.27
  -3  -8   0    1.75    0.31
  -3  -8   0    1.90    0.24
   3  -8   0    2.04    0.32
   3  -8   0    2.07    0.47
   3  -8   0    2.35    0.37
   3  -8   0    1.13    0.45
  -3   8   0    2.21    0.31
  -3   8   0    2.43    0.43
  -3   8   0    1.56    0.35
  -3   8   0    2.72    0.38
  -3   8   0    1.32    0.35
  -3   8   0    1.85    0.35
  -3   8   0    1.37    0.36
  -3   8   0    2.06    0.35
   4  -8   0    0.29    0.37
   4  -8   0    0.67    0.32
  -4  -8   0    0.38    0.40
  -4  -8   0    0.57    0.27
   4  -8   0    0.44    0.32
   4  -8   0    0.33    0.34
   4  -8   0   -0.13    0.31
  -4  -8   0    0.41    0.25
  -4  -8   0    0.37    0.19
  -4  -8   0    0.19    0.34
   4  -8   0   -1.02    0.52
  -4  -8   0    0.31    0.26
   4  -8   0   -0.21    0.50
  -4  -8   0    0.65    0.25
  -4  -8   0   -0.17    0.50
  -4  -8   0    0.41    0.25
   4  -8   0   -0.48    0.54
   4  -8   0    0.34    0.32
  -4  -8   0    0.46    0.18
  -4   8   0    0.43    0.35
  -4   8   0    0.72    0.37
  -4   8   0   -0.05    0.34
  -4   8   0    0.09    0.45
  -4   8   0    0.86    0.29
  -4   8   0    0.51    0.36
  -5  -8   0    2.24    0.26
   5  -8   0    1.57    0.62
   5  -8   0    0.46    0.61
   5  -8   0    3.00    0.41
   5  -8   0    1.87    0.40
  -5  -8   0    2.23    0.49
  -5  -8   0    1.11    0.55
  -5  -8   0    1.80    0.22
   5  -8   0    2.28    0.40
  -5  -8   0    1.59    0.34
   5  -8   0    1.42    0.38
  -5  -8   0    2.38    0.26
  -5  -8   0    1.86    0.21
   5  -8   0    1.81    0.38
  -5  -8   0    1.65    0.32
  -5  -8   0    1.51    0.36
   5  -8   0    1.31    0.63
   5  -8   0    0.93    0.41
  -5  -8   0    1.75    0.30
  -5  -8   0    1.08    0.38
  -5   8   0    2.61    0.43
  -5   8   0    2.44    0.36
  -5   8   0    1.76    0.39
  -5   8   0    1.69    0.45
  -5   8   0    1.63    0.38
  -5   8   0    2.06    0.41
  -6  -8   0    1.87    0.47
  -6  -8   0    1.87    0.41
   6  -8   0    1.30    0.62
   6  -8   0    2.59    0.45
  -6  -8   0    1.80    0.47
   6  -8   0    1.41    0.46
   6  -8   0    1.86    0.47
   6  -8   0    2.65    0.45
  -6  -8   0    2.13    0.22
  -6  -8   0    2.69    0.56
  -6  -8   0    1.90    0.22
   6  -8   0    0.74    0.61
  -6  -8   0    2.04    0.21
  -6  -8   0    1.36    0.33
  -6  -8   0    1.97    0.34
   6  -8   0    1.95    0.42
  -6  -8   0    1.85    0.20
   6  -8   0    1.90    0.48
  -6  -8   0    0.85    0.42
   6  -8   0    1.38    0.65
  -6  -8   0    1.96    0.40
  -6   8   0    2.37    0.44
  -6   8   0    2.16    0.44
  -6   8   0    1.52    0.44
  -6   8   0    1.92    0.43
  -6   8   0    2.18    0.38
  -6   8   0    1.57    0.45
   7  -8   0   -0.04    0.43
   7  -8   0   -0.25    0.61
   7  -8   0    0.14    0.55
   7  -8   0   -0.42    0.43
  -7  -8   0   -0.06    0.56
   7  -8   0   -0.50    0.66
   7  -8   0    0.01    0.42
  -7  -8   0    0.15    0.43
  -7  -8   0    0.34    0.32
  -7  -8   0    0.26    0.32
   7  -8   0    0.17    0.68
   7  -8   0    0.06    0.44
  -7  -8   0    0.10    0.49
  -7  -8   0    0.31    0.45
  -7  -8   0    0.03    0.39
   7  -8   0    0.22    0.37
  -7  -8   0   -0.42    0.40
  -7   8   0    0.65    0.41
  -7   8   0    0.29    0.35
  -7   8   0    0.32    0.46
  -7   8   0   -0.37    0.41
  -7   8   0    1.10    0.47
   8  -8   0   11.40    1.08
   8  -8   0   11.19    0.93
  -8  -8   0   10.34    1.11
  -8  -8   0   12.56    0.90
  -8  -8   0    9.75    0.88
   8  -8   0   10.94    1.15
   8  -8   0   12.29    0.96
   8  -8   0    8.20    0.97
   8  -8   0   12.59    0.95
  -8  -8   0   10.94    0.83
  -8  -8   0   10.08    0.90
  -8  -8   0   10.14    0.79
  -8  -8   0   11.03    0.93
   8  -8   0    9.19    1.10
   8  -8   0    6.96    1.07
  -8  -8   0    9.85    1.10
  -8  -8   0   10.80    0.80
  -8  -8   0   11.56    1.00
   8  -8   0   10.73    1.13
  -8   8   0    8.44    0.97
  -8   8   0   10.33    0.62
  -8   8   0   11.34    0.94
  -8   8   0    8.75    1.07
  -8   8   0   10.26    0.94
  -8   8   0   11.67    0.99
  -8   8   0   10.15    0.62
  -9  -8   0    0.28    0.78
  -9  -8   0    0.30    0.56
  -9  -8   0    0.25    0.60
  -9  -8   0    0.70    0.64
  -9  -8   0    0.34    0.70
   9  -8   0    0.61    0.57
   9  -8   0    0.05    0.56
  -9  -8   0    0.11    0.39
   9  -8   0   -0.13    0.96
   9  -8   0   -0.10    0.51
   9  -8   0    0.75    0.56
   9  -8   0    0.21    0.52
  -9  -8   0    0.53    0.53
   9  -8   0    0.13    0.88
   9  -8   0   -0.22    0.69
  -9  -8   0   -0.12    0.45
   9  -8   0    1.19    0.56
  -9  -8   0    0.30    0.52
  -9   8   0    0.58    0.53
  -9   8   0    0.16    0.58
  -9   8   0    1.15    0.61
  -9   8   0    0.16    0.21
  -9   8   0    0.05    0.47
  -9   8   0    0.14    0.54
  -9   8   0    0.84    0.60
  -9   8   0    0.27    0.22
 -10  -8   0    0.11    0.50
  10  -8   0    0.45    0.60
 -10  -8   0    1.02    0.74
 -10  -8   0    0.30    0.61
 -10  -8   0    0.50    0.65
  10  -8   0    0.75    1.05
 -10  -8   0    1.02    0.70
  10  -8   0    1.35    0.65
  10  -8   0    1.01    0.68
  10  -8   0    0.97    1.03
  10  -8   0    0.71    0.73
 -10  -8   0    0.31    0.59
  10  -8   0    1.48    0.64
 -10  -8   0    0.77    0.63
 -10  -8   0    1.23    0.67
  10  -8   0    0.51    1.06
  10  -8   0    0.23    0.70
 -10   8   0    0.29    0.64
 -10   8   0    0.51    0.24
 -10   8   0    0.86    0.31
 -10   8   0    1.28    0.73
 -10   8   0    0.73    0.71
 -10   8   0    0.86    0.58
 -10   8   0    0.64    0.56
 -10   8   0    0.92    0.72
 -11  -8   0    0.26    0.73
  11  -8   0    1.28    1.17
 -11  -8   0    1.14    0.76
 -11  -8   0    1.14    0.68
 -11  -8   0    0.11    0.69
  11  -8   0    1.71    0.82
  11  -8   0    0.34    1.18
 -11  -8   0    0.82    0.57
  11  -8   0    0.74    0.84
  11  -8   0    0.25    0.76
 -11  -8   0    0.39    0.71
  11  -8   0    0.70    0.72
 -11  -8   0    1.11    0.79
 -11  -8   0    0.60    0.72
  11  -8   0    0.33    0.70
  11  -8   0    0.37    0.64
  11  -8   0    1.06    0.83
 -11   8   0    1.02    0.83
 -11   8   0    0.00    0.75
 -11   8   0    0.63    0.30
 -11   8   0    1.07    0.65
 -11   8   0    1.24    0.98
 -11   8   0    0.34    0.62
 -11   8   0    1.00    0.38
 -11   8   0    0.56    0.82
   0  -9   0    0.30    0.62
   0  -9   0    0.15    0.37
   0  -9   0    0.21    0.30
   0  -9   0    0.03    0.43
   0  -9   0    0.55    0.42
   0  -9   0    0.55    0.29
   0  -9   0    0.29    0.10
   0  -9   0    0.58    0.29
   0  -9   0    0.50    0.10
   0  -9   0    0.86    0.31
   0  -9   0    0.18    0.58
   0   9   0    0.11    0.44
   0   9   0    0.21    0.25
   0   9   0    0.32    0.25
   0   9   0    0.53    0.37
   0   9   0    0.64    0.25
   0   9   0    0.60    0.28
   0   9   0    0.41    0.26
  -1  -9   0    7.50    0.59
  -1  -9   0    6.85    0.48
  -1  -9   0    6.45    0.92
   1  -9   0    6.76    0.68
  -1  -9   0    7.47    0.48
   1  -9   0    8.30    0.64
   1  -9   0    7.77    0.73
  -1  -9   0    7.24    0.68
  -1  -9   0    8.97    0.63
   1  -9   0    7.26    0.70
   1  -9   0    6.43    0.92
   1  -9   0    7.59    0.60
   1  -9   0    7.17    0.61
   1  -9   0    7.54    0.75
  -1  -9   0    6.48    0.68
  -1  -9   0    7.39    0.69
   1  -9   0    8.06    0.60
  -1  -9   0    7.78    0.73
  -1   9   0    6.84    0.57
  -1   9   0    6.88    0.58
   1   9   0    7.41    0.77
   1   9   0    7.05    0.51
   1   9   0    7.14    0.49
  -1   9   0    8.04    0.57
  -1   9   0    7.98    0.61
   1   9   0    7.68    0.50
  -1   9   0    7.18    0.57
  -1   9   0    7.95    0.70
   1   9   0    7.04    0.51
  -1   9   0    8.31    0.76
  -2  -9   0   25.73    1.58
  -2  -9   0   23.83    1.78
  -2  -9   0   26.63    1.58
  -2  -9   0   26.31    1.63
   2  -9   0   27.00    1.59
   2  -9   0   25.93    1.62
   2  -9   0   28.40    1.66
   2  -9   0   25.44    1.56
   2  -9   0   26.05    1.58
  -2  -9   0   25.27    1.51
   2  -9   0   25.87    1.57
  -2  -9   0   27.97    1.56
  -2  -9   0   25.50    1.58
   2  -9   0   24.88    1.65
  -2  -9   0   27.93    1.53
  -2  -9   0   26.46    1.51
  -2  -9   0   25.23    1.53
   2  -9   0   22.52    1.75
   2  -9   0   26.08    1.62
  -2   9   0   28.99    1.57
  -2   9   0   26.11    1.56
  -2   9   0   27.96    1.66
  -2   9   0   23.25    1.58
  -2   9   0   25.29    1.58
  -2   9   0   26.08    1.56
  -2   9   0   26.98    1.61
  -3  -9   0   15.64    1.04
  -3  -9   0   15.04    0.97
   3  -9   0   14.45    1.19
  -3  -9   0   15.82    0.96
  -3  -9   0   15.60    1.02
  -3  -9   0   14.93    0.97
   3  -9   0   14.58    1.01
  -3  -9   0   15.53    1.30
   3  -9   0   15.21    1.06
   3  -9   0   16.35    1.02
   3  -9   0   13.32    1.27
  -3  -9   0   17.21    0.98
  -3  -9   0   15.99    1.02
   3  -9   0   15.41    1.11
  -3  -9   0   17.47    1.02
  -3  -9   0   17.54    1.13
   3  -9   0   14.97    1.18
   3  -9   0   16.11    1.05
  -3  -9   0   14.63    1.08
  -3   9   0   16.33    1.04
  -3   9   0   15.67    1.03
  -3   9   0   16.89    1.04
  -3   9   0   16.19    1.14
  -3   9   0   18.84    1.12
   4  -9   0    3.65    0.45
  -4  -9   0    3.04    0.39
  -4  -9   0    1.81    0.77
  -4  -9   0    2.15    0.34
  -4  -9   0    2.82    0.36
   4  -9   0    2.05    0.43
   4  -9   0    2.62    0.42
   4  -9   0    2.05    0.42
   4  -9   0    1.67    0.67
  -4  -9   0    3.19    0.34
   4  -9   0    2.77    0.51
  -4  -9   0    2.54    0.38
  -4  -9   0    2.04    0.45
   4  -9   0    1.43    0.65
  -4  -9   0    2.74    0.55
  -4  -9   0    2.32    0.28
   4  -9   0    2.36    0.43
  -4  -9   0    2.97    0.38
   4  -9   0    2.13    0.69
  -4   9   0    1.86    0.45
  -4   9   0    2.72    0.40
  -4   9   0    2.29    0.49
  -4   9   0    2.67    0.53
  -4   9   0    3.13    0.54
  -4   9   0    2.41    0.46
  -4   9   0    2.07    0.45
  -5  -9   0   11.19    0.79
  -5  -9   0   10.86    0.77
   5  -9   0    6.69    1.19
  -5  -9   0   10.70    0.67
  -5  -9   0   10.27    0.86
   5  -9   0   11.55    0.85
  -5  -9   0    9.49    1.42
   5  -9   0    9.91    1.10
  -5  -9   0   10.13    0.94
   5  -9   0   10.64    0.91
  -5  -9   0   11.09    0.67
  -5  -9   0    9.37    0.87
  -5  -9   0   11.08    0.87
   5  -9   0   10.08    0.82
  -5  -9   0   10.58    0.85
   5  -9   0   10.98    0.86
   5  -9   0   10.58    0.82
  -5  -9   0   12.64    0.78
   5  -9   0   11.27    1.11
   5  -9   0   10.86    0.88
  -5   9   0   10.92    0.84
  -5   9   0   10.41    0.89
  -5   9   0   10.59    0.81
  -5   9   0    9.64    0.84
  -5   9   0   11.29    0.93
   6  -9   0    9.99    1.16
   6  -9   0    9.21    0.80
  -6  -9   0    8.87    0.57
  -6  -9   0    9.81    0.76
  -6  -9   0    8.37    0.85
  -6  -9   0    9.97    0.74
   6  -9   0    9.37    0.79
   6  -9   0   10.44    1.14
   6  -9   0    7.88    0.82
   6  -9   0    9.99    1.12
  -6  -9   0    8.75    0.91
  -6  -9   0    7.56    0.80
   6  -9   0   10.36    0.85
  -6  -9   0    9.15    0.72
   6  -9   0   10.15    0.80
  -6  -9   0   11.00    1.13
  -6  -9   0    8.54    0.57
   6  -9   0    8.86    0.88
  -6  -9   0    8.19    0.85
  -6  -9   0   10.05    1.04
  -6   9   0    8.40    0.85
  -6   9   0    7.76    0.83
  -6   9   0    8.56    0.86
  -6   9   0    8.58    0.84
  -6   9   0    9.64    0.91
  -6   9   0    9.36    0.88
  -6   9   0    9.46    0.78
  -6   9   0    8.85    0.87
   7  -9   0    0.72    0.53
  -7  -9   0    0.60    0.57
  -7  -9   0   -0.11    0.62
  -7  -9   0   -0.11    0.85
   7  -9   0    0.46    0.52
   7  -9   0    0.43    0.76
   7  -9   0   -0.17    0.46
  -7  -9   0    0.93    0.56
  -7  -9   0    0.25    0.45
  -7  -9   0    0.32    0.47
   7  -9   0   -0.12    0.54
   7  -9   0    0.71    0.51
   7  -9   0    0.35    0.79
  -7  -9   0    0.34    0.52
   7  -9   0    0.17    0.51
  -7  -9   0   -0.20    0.39
   7  -9   0   -0.47    0.80
  -7  -9   0   -0.12    0.36
  -7   9   0    1.24    0.61
  -7   9   0    0.47    0.60
  -7   9   0   -0.08    0.51
  -7   9   0   -0.02    0.49
  -7   9   0    0.65    0.61
  -7   9   0    0.03    0.45
  -7   9   0    0.11    0.58
  -7   9   0    0.06    0.45
  -8  -9   0    0.68    0.51
   8  -9   0    0.81    0.57
   8  -9   0    0.93    0.65
   8  -9   0    0.40    0.55
  -8  -9   0    0.34    0.86
   8  -9   0    0.45    0.52
   8  -9   0    0.07    0.63
   8  -9   0    0.64    1.07
   8  -9   0    1.00    0.64
  -8  -9   0   -0.11    0.80
  -8  -9   0    0.78    0.58
  -8  -9   0   -0.58    0.57
  -8  -9   0    0.85    0.43
  -8  -9   0    0.35    0.67
  -8  -9   0    0.26    0.57
  -8  -9   0    1.29    0.88
   8  -9   0    0.30    0.83
  -8  -9   0    0.39    0.41
   8  -9   0    0.64    1.03
  -8   9   0    0.82    0.63
  -8   9   0    0.90    0.62
  -8   9   0    0.45    0.65
  -8   9   0    0.50    0.45
  -8   9   0    0.99    0.51
  -8   9   0    0.07    0.59
  -9  -9   0    6.71    0.91
   9  -9   0    8.52    1.18
  -9  -9   0    6.74    0.97
   9  -9   0    4.98    0.80
  -9  -9   0    7.20    0.73
  -9  -9   0    7.94    1.00
   9  -9   0    7.20    0.91
  -9  -9   0    5.37    0.72
  -9  -9   0    6.53    0.91
   9  -9   0    5.15    0.84
  -9  -9   0    7.29    0.73
   9  -9   0    4.68    0.73
  -9  -9   0    5.98    1.04
  -9  -9   0    6.34    0.90
  -9  -9   0    4.12    0.67
   9  -9   0    6.37    0.93
   9  -9   0    4.93    0.78
  -9  -9   0    7.56    1.04
  -9   9   0    4.46    0.71
  -9   9   0    5.90    0.84
  -9   9   0    8.19    0.95
  -9   9   0    7.25    1.00
  -9   9   0    4.86    0.78
  -9   9   0    6.39    0.84
 -10  -9   0    1.37    0.86
  10  -9   0    0.98    1.42
  10  -9   0    1.64    0.78
 -10  -9   0    1.44    0.53
 -10  -9   0    1.52    0.67
  10  -9   0    1.61    1.00
 -10  -9   0    1.42    0.76
  10  -9   0    2.18    0.77
 -10  -9   0    2.04    1.03
 -10  -9   0    1.37    0.94
 -10  -9   0    1.40    0.53
  10  -9   0    0.87    0.82
 -10  -9   0    1.43    0.62
  10  -9   0    1.08    0.65
  10  -9   0    0.03    1.37
 -10  -9   0    2.03    0.85
 -10  -9   0    1.61    0.70
 -10  -9   0    1.54    0.79
  10  -9   0    0.82    0.70
  10  -9   0    0.94    0.73
 -10  -9   0    1.46    0.73
 -10   9   0    1.41    0.93
 -10   9   0    1.65    0.79
 -10   9   0    0.90    0.93
 -10   9   0    1.15    0.77
 -10   9   0    1.62    0.66
   0 -10   0    2.07    0.58
   0 -10   0    2.38    0.53
   0 -10   0    2.00    0.42
   0 -10   0    2.56    0.41
   0 -10   0    3.13    0.43
   0 -10   0    2.36    0.49
   0 -10   0    2.46    0.57
   0 -10   0    2.82    0.41
   0 -10   0    1.86    0.77
   0  10   0    2.29    0.33
   0  10   0    2.11    0.35
   0  10   0    2.70    0.39
   0  10   0    2.53    0.35
   0  10   0    2.12    0.33
   0  10   0    2.56    0.55
  -1 -10   0    6.85    0.68
   1 -10   0    5.37    0.66
  -1 -10   0    7.57    0.63
   1 -10   0    7.21    0.80
   1 -10   0    7.64    0.67
  -1 -10   0    7.34    0.76
  -1 -10   0    6.34    0.48
   1 -10   0    7.09    0.79
   1 -10   0    7.65    0.71
  -1 -10   0    7.73    1.04
  -1 -10   0    8.19    0.49
  -1 -10   0    7.14    0.79
  -1 -10   0    7.90    0.78
  -1 -10   0    6.99    0.75
   1 -10   0    7.37    0.79
   1 -10   0    7.58    0.65
  -1 -10   0    8.86    0.67
  -1 -10   0    7.94    0.63
   1 -10   0    8.07    0.76
  -1  10   0    7.10    0.78
   1  10   0    8.20    0.54
  -1  10   0    8.98    0.89
   1  10   0    7.34    0.52
  -1  10   0    6.75    0.62
  -1  10   0    7.99    0.66
   1  10   0    7.62    0.53
  -1  10   0    7.99    0.62
   1  10   0    7.28    0.52
  -1  10   0    8.42    0.62
  -1  10   0    8.14    0.63
   2 -10   0   12.26    0.95
  -2 -10   0   12.60    0.81
   2 -10   0   11.32    0.86
   2 -10   0   10.97    0.87
  -2 -10   0   12.53    0.92
   2 -10   0   10.07    1.24
  -2 -10   0   12.02    0.98
  -2 -10   0   11.43    0.93
   2 -10   0   11.41    1.05
   2 -10   0   12.32    0.91
  -2 -10   0    9.07    1.24
   2 -10   0   11.84    0.97
  -2 -10   0   10.90    0.92
  -2 -10   0   12.77    0.74
   2 -10   0   10.93    1.03
  -2 -10   0   12.65    0.87
  -2 -10   0   11.65    0.84
   2 -10   0   13.96    0.88
  -2 -10   0   11.42    0.82
  -2 -10   0   11.17    0.74
  -2  10   0   11.72    0.86
  -2  10   0    9.61    0.90
  -2  10   0   11.97    0.82
  -2  10   0   11.52    0.82
  -2  10   0   10.95    0.96
  -2  10   0   11.85    1.02
  -2  10   0   11.06    0.89
  -3 -10   0    0.74    0.54
  -3 -10   0    0.42    0.31
  -3 -10   0    0.40    0.45
   3 -10   0    0.64    0.68
   3 -10   0    0.15    0.67
   3 -10   0    0.56    0.42
  -3 -10   0    0.59    0.32
   3 -10   0    0.98    0.81
  -3 -10   0    0.15    0.28
   3 -10   0    0.05    0.40
   3 -10   0    0.26    0.41
  -3 -10   0    0.34    0.44
  -3 -10   0    0.61    0.28
  -3 -10   0    0.40    0.48
  -3 -10   0    0.62    0.38
  -3 -10   0    0.08    0.77
   3 -10   0    0.81    0.43
   3 -10   0    0.58    0.89
   3 -10   0    0.42    0.40
  -3 -10   0    0.24    0.35
  -3  10   0   -0.14    0.42
  -3  10   0   -0.07    0.42
  -3  10   0    0.35    0.42
  -3  10   0    0.50    0.38
  -3  10   0    0.15    0.46
  -3  10   0    0.06    0.78
  -3  10   0    0.77    0.44
  -4 -10   0    0.17    0.52
   4 -10   0   -0.17    0.45
   4 -10   0   -0.01    0.51
   4 -10   0   -0.08    0.48
  -4 -10   0   -0.26    0.31
   4 -10   0   -0.23    0.53
  -4 -10   0    0.33    0.33
  -4 -10   0    0.19    0.40
  -4 -10   0   -0.05    0.41
   4 -10   0    0.14    0.49
   4 -10   0   -0.58    0.77
   4 -10   0    0.07    0.80
  -4 -10   0   -0.25    0.36
  -4 -10   0   -0.21    0.80
   4 -10   0    0.17    0.78
  -4 -10   0   -0.01    0.46
  -4 -10   0   -0.27    0.28
  -4 -10   0   -0.15    0.30
   4 -10   0    0.14    0.46
  -4 -10   0    0.17    0.42
  -4  10   0   -0.02    0.48
  -4  10   0   -0.12    0.39
  -4  10   0    0.38    0.48
  -4  10   0   -0.18    0.46
  -4  10   0    0.40    0.57
  -4  10   0    0.39    0.48
  -4  10   0    0.38    0.47
   5 -10   0    1.90    0.56
  -5 -10   0    0.84    0.38
  -5 -10   0    0.82    0.39
  -5 -10   0    0.75    0.30
   5 -10   0   -0.97    0.84
  -5 -10   0    1.31    0.38
  -5 -10   0    0.14    0.62
  -5 -10   0    0.44    0.85
   5 -10   0    0.62    0.56
  -5 -10   0    0.82    0.42
  -5 -10   0    0.82    0.63
   5 -10   0    1.30    0.84
   5 -10   0    1.68    0.52
   5 -10   0    0.65    0.86
  -5 -10   0    1.28    0.38
   5 -10   0    0.80    0.51
  -5 -10   0    0.85    0.41
  -5 -10   0    1.28    0.29
  -5 -10   0    1.45    0.51
   5 -10   0    1.09    0.61
   5 -10   0    0.93    0.53
  -5  10   0    1.03    0.56
  -5  10   0    1.58    0.60
  -5  10   0    1.32    0.59
  -5  10   0    1.40    0.44
  -5  10   0    0.72    0.55
  -5  10   0    1.52    0.61
  -5  10   0    0.96    0.57
  -6 -10   0    2.62    1.03
  -6 -10   0    1.93    0.30
  -6 -10   0    2.66    0.64
  -6 -10   0    1.96    0.47
  -6 -10   0    2.18    0.47
   6 -10   0    2.88    0.59
   6 -10   0    2.14    0.63
  -6 -10   0    1.87    0.44
   6 -10   0    2.44    0.98
   6 -10   0    2.97    0.61
  -6 -10   0    2.52    0.34
   6 -10   0    2.65    0.67
   6 -10   0    2.88    0.66
  -6 -10   0    2.23    0.59
  -6 -10   0    2.40    0.29
  -6 -10   0    2.24    0.83
  -6 -10   0    2.67    0.33
   6 -10   0    2.29    0.57
   6 -10   0    1.40    0.89
   6 -10   0    3.56    1.00
  -6 -10   0    2.48    0.50
  -6 -10   0    2.38    0.67
  -6 -10   0    3.20    0.72
  -6  10   0    2.69    0.69
  -6  10   0    2.15    0.68
  -6  10   0    1.63    0.63
  -6  10   0    2.36    0.53
  -6  10   0    1.95    0.65
   7 -10   0   -1.10    1.04
  -7 -10   0    0.44    0.61
  -7 -10   0   -0.95    0.99
   7 -10   0    0.16    1.08
   7 -10   0    0.31    0.62
   7 -10   0    0.35    0.97
  -7 -10   0    0.25    0.65
  -7 -10   0    0.31    0.46
  -7 -10   0    0.26    0.72
   7 -10   0    0.09    0.62
   7 -10   0    0.22    0.69
   7 -10   0   -0.35    0.57
  -7 -10   0    0.70    0.83
  -7 -10   0    0.25    0.45
   7 -10   0   -0.17    0.68
  -7 -10   0   -0.21    0.57
  -7 -10   0    0.76    0.53
  -7 -10   0    0.01    0.49
   7 -10   0    0.64    0.66
  -7  10   0   -0.10    0.63
  -7  10   0    0.66    0.75
  -7  10   0    0.16    0.52
  -7  10   0    0.08    0.69
  -7  10   0   -0.16    0.68
  -7  10   0   -0.67    0.75
  -7  10   0    0.00    0.66
  -8 -10   0    0.17    0.48
  -8 -10   0    0.56    0.80
   8 -10   0   -0.23    1.24
  -8 -10   0    0.18    0.67
  -8 -10   0   -0.31    1.13
  -8 -10   0    0.05    0.99
   8 -10   0    0.02    0.67
  -8 -10   0    0.58    0.60
  -8 -10   0    0.45    0.49
   8 -10   0   -0.65    0.66
   8 -10   0    0.23    0.74
   8 -10   0    0.24    0.71
  -8 -10   0   -0.17    0.76
   8 -10   0   -0.36    0.69
  -8 -10   0    0.07    0.73
   8 -10   0    0.11    0.94
   8 -10   0   -0.35    0.62
  -8 -10   0    0.15    0.56
  -8 -10   0   -0.32    0.60
   8 -10   0   -0.60    1.20
  -8  10   0    0.06    0.77
  -8  10   0    0.28    0.84
  -8  10   0    0.40    0.81
  -8  10   0   -0.04    0.85
  -8  10   0    0.20    0.56
  -8  10   0   -0.56    0.85
  -8  10   0    0.65    0.81
   9 -10   0    4.27    0.95
   9 -10   0    3.73    0.82
   9 -10   0    4.12    0.92
   9 -10   0    5.03    1.29
   9 -10   0    3.46    1.13
  -9 -10   0    5.13    1.13
  -9 -10   0    3.74    0.70
  -9 -10   0    5.96    0.99
  -9 -10   0    3.60    1.17
  -9 -10   0    4.90    1.00
   9 -10   0    4.28    1.31
  -9 -10   0    5.12    0.91
  -9 -10   0    3.96    0.75
  -9 -10   0    4.87    0.90
  -9 -10   0    3.68    0.63
   9 -10   0    5.26    0.83
  -9 -10   0    3.02    0.81
   9 -10   0    3.21    0.91
   9 -10   0    3.89    0.82
  -9 -10   0    4.22    0.65
  -9 -10   0    3.01    0.70
  -9  10   0    4.91    0.95
  -9  10   0    3.53    1.00
  -9  10   0    4.48    0.76
  -9  10   0    3.85    0.83
  -9  10   0    4.08    0.92
  -9  10   0    5.56    0.96
  -9  10   0    4.97    1.02
   0 -11   0   -0.34    0.67
   0 -11   0   -0.42    0.67
   0 -11   0    0.46    0.45
   0 -11   0   -0.03    0.46
   0 -11   0   -0.11    0.45
   0 -11   0   -0.54    1.02
   0 -11   0    0.23    0.55
   0 -11   0   -0.58    0.42
   0 -11   0    0.08    0.58
   0  11   0    0.09    0.34
   0  11   0    0.47    0.35
   0  11   0    0.03    0.32
   0  11   0    0.08    0.32
   0  11   0    0.68    0.67
   1 -11   0   -0.27    0.68
   1 -11   0    0.10    0.55
   1 -11   0    0.62    0.89
  -1 -11   0    0.73    0.90
  -1 -11   0   -0.46    0.44
   1 -11   0   -0.39    0.58
   1 -11   0    0.04    0.45
  -1 -11   0    0.20    0.15
  -1 -11   0    1.14    0.47
  -1 -11   0   -0.11    0.61
  -1 -11   0   -0.08    0.61
  -1 -11   0    0.00    0.42
   1 -11   0   -0.07    0.69
   1 -11   0    0.65    0.48
  -1 -11   0    0.51    0.57
  -1 -11   0    0.30    0.59
  -1 -11   0   -0.07    0.15
   1 -11   0    0.05    0.50
  -1 -11   0   -0.03    0.42
   1 -11   0   -0.03    0.51
   1  11   0    0.27    0.24
  -1  11   0    0.01    0.38
  -1  11   0    0.23    0.41
   1  11   0    0.11    0.24
  -1  11   0    0.42    0.57
   1  11   0    0.55    0.24
  -1  11   0    0.36    0.42
  -1  11   0   -0.02    0.66
  -1  11   0    0.23    0.38
   1  11   0    0.22    0.24
  -1  11   0   -0.25    0.42
  -2 -11   0    2.34    0.69
  -2 -11   0    0.48    0.51
   2 -11   0    1.25    0.79
   2 -11   0    2.52    0.53
  -2 -11   0    2.77    0.45
  -2 -11   0    2.81    0.51
   2 -11   0    2.43    0.66
   2 -11   0    3.04    1.04
   2 -11   0    1.18    0.56
  -2 -11   0    2.65    0.61
  -2 -11   0    2.52    0.37
  -2 -11   0    1.74    0.32
   2 -11   0    1.95    0.60
   2 -11   0    1.89    0.79
  -2 -11   0    2.62    0.47
  -2 -11   0    1.26    0.60
   2 -11   0    2.77    0.56
  -2 -11   0    1.99    0.47
  -2 -11   0    2.03    1.03
  -2  11   0    2.16    0.50
  -2  11   0    2.47    0.73
  -2  11   0    2.79    0.48
  -2  11   0    2.30    0.48
  -2  11   0    1.46    0.47
  -2  11   0    2.89    0.64
  -2  11   0    2.97    0.50
   3 -11   0   -0.95    0.83
  -3 -11   0    0.01    0.40
  -3 -11   0    0.42    0.32
  -3 -11   0    0.04    0.55
  -3 -11   0    0.51    0.68
   3 -11   0   -0.36    0.52
   3 -11   0    0.56    0.84
   3 -11   0   -0.38    0.51
   3 -11   0    1.49    1.01
   3 -11   0    0.11    0.50
  -3 -11   0    0.74    1.07
  -3 -11   0   -0.40    0.57
  -3 -11   0    0.02    0.54
  -3 -11   0   -0.11    0.42
  -3 -11   0    0.18    0.41
  -3 -11   0    0.45    0.44
   3 -11   0    0.35    0.49
   3 -11   0   -0.40    0.60
  -3 -11   0    0.09    0.32
   3 -11   0   -0.37    0.98
  -3  11   0   -0.59    0.50
  -3  11   0    0.75    0.60
  -3  11   0    0.36    0.52
  -3  11   0    0.99    0.46
  -3  11   0    0.34    0.52
  -3  11   0   -0.06    0.65
  -3  11   0    0.03    0.51
  -4 -11   0    2.26    0.40
  -4 -11   0    1.21    0.61
  -4 -11   0    1.92    0.54
  -4 -11   0    1.97    0.39
  -4 -11   0    2.48    0.53
   4 -11   0    2.40    0.85
   4 -11   0    1.76    0.63
  -4 -11   0    0.83    0.67
   4 -11   0    0.62    0.64
   4 -11   0    1.42    0.85
  -4 -11   0    2.58    0.54
  -4 -11   0    1.61    0.40
   4 -11   0    1.29    0.62
  -4 -11   0    1.21    0.46
   4 -11   0    1.33    0.60
  -4 -11   0    1.34    0.39
  -4 -11   0    1.68    1.16
   4 -11   0    0.93    1.03
   4 -11   0    1.35    0.65
   4 -11   0    1.37    0.55
  -4 -11   0    1.06    0.58
  -4  11   0    2.22    0.60
  -4  11   0    2.69    0.67
  -4  11   0    2.51    0.61
  -4  11   0    2.72    0.72
  -4  11   0    1.63    0.60
  -4  11   0    1.73    0.65
  -4  11   0    1.16    0.61
  -5 -11   0    0.31    0.74
  -5 -11   0    0.33    0.63
   5 -11   0    0.18    0.60
  -5 -11   0    0.22    1.11
  -5 -11   0    0.27    0.35
   5 -11   0   -0.01    0.61
  -5 -11   0    0.58    0.66
   5 -11   0    0.98    0.58
   5 -11   0    0.35    0.60
  -5 -11   0    0.43    0.50
  -5 -11   0    0.11    0.46
  -5 -11   0    0.27    0.42
  -5 -11   0    0.14    0.36
   5 -11   0    1.35    1.11
   5 -11   0    1.00    1.05
  -5 -11   0    0.38    0.48
   5 -11   0    0.84    0.72
   5 -11   0   -0.82    1.01
   5 -11   0   -0.52    0.57
  -5 -11   0    0.31    0.50
  -5 -11   0    0.20    0.43
  -5  11   0    0.69    0.62
  -5  11   0    0.18    0.51
  -5  11   0    0.56    0.64
  -5  11   0    0.49    0.66
  -5  11   0    0.40    0.61
  -5  11   0    0.28    0.70
  -5  11   0    0.57    0.74
   6 -11   0    3.12    0.78
  -6 -11   0    2.70    0.74
  -6 -11   0    3.68    0.58
  -6 -11   0    4.45    0.56
  -6 -11   0    4.49    1.29
   6 -11   0    4.30    1.24
   6 -11   0    4.39    1.22
   6 -11   0    3.48    0.71
  -6 -11   0    4.08    0.61
  -6 -11   0    3.23    0.40
  -6 -11   0    3.39    0.56
  -6 -11   0    3.51    0.87
   6 -11   0    3.43    0.75
  -6 -11   0    4.17    0.49
  -6 -11   0    3.86    0.78
  -6 -11   0    4.52    0.51
  -6 -11   0    4.22    0.74
   6 -11   0    3.45    1.19
   6 -11   0    2.13    0.64
   6 -11   0    3.47    0.73
  -6 -11   0    3.94    0.44
   6 -11   0    3.26    0.82
  -6 -11   0    5.40    1.03
  -6  11   0    4.31    0.65
  -6  11   0    3.34    0.81
  -6  11   0    3.35    0.80
  -6  11   0    1.82    0.69
  -6  11   0    4.20    0.86
  -6  11   0    1.95    0.75
  -6  11   0    2.64    0.78
   7 -11   0    0.32    0.88
   7 -11   0    0.51    0.74
  -7 -11   0   -0.10    0.76
  -7 -11   0   -0.20    0.56
  -7 -11   0   -0.30    0.67
  -7 -11   0    0.89    1.01
   7 -11   0    1.60    1.36
   7 -11   0   -0.24    0.72
   7 -11   0   -0.49    1.30
   7 -11   0   -0.06    0.73
  -7 -11   0    0.75    0.85
  -7 -11   0    0.22    0.54
  -7 -11   0    0.68    0.71
   7 -11   0    0.02    0.76
   7 -11   0   -0.57    0.65
   7 -11   0    1.05    1.20
  -7 -11   0    1.38    0.81
  -7 -11   0   -0.07    1.31
  -7  11   0    0.46    1.13
  -7  11   0    0.01    0.85
  -7  11   0   -0.11    0.83
  -7  11   0   -0.26    0.81
  -7  11   0    0.80    1.11
  -7  11   0    1.11    0.87
  -7  11   0    0.30    0.63
   0 -12   0   11.68    1.31
   0 -12   0   13.28    1.73
   0 -12   0   10.58    1.21
   0 -12   0   12.78    1.04
   0 -12   0    9.30    1.18
   0 -12   0   10.75    1.32
   0 -12   0   12.29    1.06
   0 -12   0   13.51    1.08
   0 -12   0   12.74    1.04
   0  12   0   13.47    0.88
   0  12   0   13.47    0.88
   0  12   0   12.25    0.85
   0  12   0   12.48    0.85
  -1 -12   0    1.08    0.55
  -1 -12   0    1.11    0.66
   1 -12   0    0.68    0.56
   1 -12   0    0.25    0.64
  -1 -12   0    1.02    1.30
   1 -12   0    0.18    0.57
  -1 -12   0    0.31    0.62
  -1 -12   0    1.19    0.60
  -1 -12   0    0.52    0.79
   1 -12   0    1.31    0.94
   1 -12   0    0.96    1.16
  -1 -12   0    0.81    0.80
  -1 -12   0    0.25    0.56
   1 -12   0    0.90    0.98
  -1 -12   0    0.16    0.58
   1 -12   0    0.50    0.92
   1 -12   0    1.97    0.79
   1 -12   0   -0.50    0.99
  -1  12   0    1.08    0.85
  -1  12   0    0.87    0.49
  -1  12   0    0.99    0.46
  -1  12   0    1.06    0.47
  -1  12   0    1.30    0.52
  -1  12   0    0.86    0.45
   2 -12   0    0.07    0.76
   2 -12   0    0.53    0.98
   2 -12   0    0.25    0.64
  -2 -12   0    0.27    0.53
   2 -12   0    0.47    0.64
   2 -12   0    0.05    0.64
  -2 -12   0    0.24    0.41
  -2 -12   0    0.26    0.76
  -2 -12   0    0.39    0.77
   2 -12   0   -0.32    0.66
  -2 -12   0    0.16    0.50
  -2 -12   0    0.38    0.53
  -2 -12   0    0.61    1.30
  -2 -12   0   -0.63    0.56
  -2 -12   0    0.74    0.79
   2 -12   0    0.55    1.19
  -2 -12   0   -0.27    0.73
   2 -12   0    0.64    1.00
  -2 -12   0    0.00    0.31
   2 -12   0   -0.47    0.58
  -2  12   0    0.01    0.57
  -2  12   0    0.67    0.57
  -2  12   0    1.18    0.54
  -2  12   0    0.07    0.85
  -2  12   0    0.54    0.52
  -2  12   0    0.62    0.72
  -2  12   0    0.51    0.65
   3 -12   0    1.48    1.25
  -3 -12   0    2.46    0.39
   3 -12   0    2.26    1.07
  -3 -12   0    4.09    0.82
  -3 -12   0    2.96    0.59
  -3 -12   0    2.13    0.54
   3 -12   0    2.60    0.68
  -3 -12   0    2.82    0.76
   3 -12   0    2.47    0.75
   3 -12   0    1.27    0.64
  -3 -12   0    1.63    0.73
  -3 -12   0    3.75    1.35
  -3 -12   0    2.28    0.72
   3 -12   0    1.73    1.06
   3 -12   0    2.16    0.76
  -3 -12   0    2.94    0.57
  -3 -12   0    3.03    0.71
   3 -12   0    1.76    1.29
   3 -12   0    2.51    0.73
  -3 -12   0    2.59    0.40
  -3  12   0    2.75    0.80
  -3  12   0    3.05    0.87
  -3  12   0    3.17    0.64
  -3  12   0    3.80    0.66
  -3  12   0    2.54    0.62
  -3  12   0    2.43    0.62
  -3  12   0    3.17    0.67
  -4 -12   0    0.12    0.67
   4 -12   0   -0.46    0.76
  -4 -12   0   -0.02    0.50
   4 -12   0    0.38    1.19
  -4 -12   0    0.20    0.68
   4 -12   0    0.28    0.84
   4 -12   0   -0.42    0.66
  -4 -12   0    0.24    0.41
  -4 -12   0   -0.08    0.54
  -4 -12   0    0.09    0.95
  -4 -12   0   -0.35    0.86
   4 -12   0    0.17    0.68
   4 -12   0    0.58    1.17
   4 -12   0    0.37    0.77
  -4 -12   0   -0.07    0.43
  -4 -12   0    0.34    1.43
   4 -12   0   -0.11    1.19
  -4 -12   0    0.56    0.89
  -4 -12   0    0.09    0.77
   4 -12   0    0.40    0.74
  -4 -12   0   -0.10    0.49
  -4  12   0    0.32    0.69
  -4  12   0   -0.10    0.89
  -4  12   0   -0.31    0.67
  -4  12   0    0.59    0.61
  -4  12   0    0.08    1.00
  -4  12   0    0.79    0.70
  -4  12   0    0.59    0.68
 -15   0   1    1.00    0.95
  15   0  -1    0.23    1.03
  15   0  -1    0.78    0.85
  15   0  -1    0.26    1.02
 -15   0   1   -0.30    0.73
 -15   0   1    0.33    0.75
  15   0  -1    0.86    0.62
 -15   0   1   -0.58    0.95
 -15   0   1    0.12    0.71
  15   0  -1    0.49    0.76
 -15   0   1    0.51    0.65
  15   0  -1    0.41    0.64
 -15   0   1   -0.18    0.68
  15   0  -1    0.79    0.50
 -15   0   1   -0.07    0.70
 -15   0   1   -0.36    0.71
 -15   0   1    1.32    0.75
  15   0  -1    0.40    0.81
 -14   0   1   -0.23    0.62
 -14   0   1    0.12    0.54
 -14   0   1   -0.42    0.58
  14   0  -1    0.15    0.82
  14   0  -1    0.19    0.71
 -14   0   1   -0.45    0.63
 -14   0   1   -0.30    0.61
 -14   0   1   -1.05    0.59
 -14   0   1   -0.36    0.69
  14   0  -1    0.64    0.69
  14   0  -1    0.53    0.49
  14   0  -1   -0.04    0.66
 -14   0   1    0.30    0.65
  14   0  -1   -0.93    0.79
  14   0  -1   -0.53    0.47
 -14   0   1    0.20    0.69
  14   0  -1   -0.03    0.42
  13   0  -1    0.30    0.44
 -13   0   1    0.20    0.52
  13   0  -1   -0.28    0.57
 -13   0   1    0.16    0.49
 -13   0   1   -0.36    0.49
  13   0  -1   -0.29    0.41
 -13   0   1   -0.12    0.52
  13   0  -1   -0.21    0.66
  13   0  -1    0.30    0.59
 -13   0   1    0.12    0.48
  13   0  -1    0.56    0.66
 -13   0   1   -0.56    0.52
  13   0  -1    0.26    0.38
 -13   0   1   -0.06    0.67
 -13   0   1   -0.30    0.53
 -13   0   1   -0.19    0.68
  13   0  -1   -0.07    0.54
 -12   0   1    0.55    0.43
 -12   0   1    0.28    0.60
  12   0  -1   -0.12    0.36
 -12   0   1   -0.28    0.52
  12   0  -1    0.16    0.48
  12   0  -1    0.72    0.57
 -12   0   1   -0.11    0.59
 -12   0   1   -0.10    0.47
 -12   0   1   -0.13    0.51
  12   0  -1    0.77    0.56
  12   0  -1    0.01    0.44
 -12   0   1    0.10    0.46
 -12   0   1   -0.19    0.41
  12   0  -1    0.22    0.32
 -12   0   1   -0.06    0.45
  12   0  -1    1.45    0.50
  12   0  -1    0.15    0.35
 -11   0   1    1.30    0.38
 -11   0   1    1.75    0.40
 -11   0   1    2.10    0.55
  11   0  -1    1.15    0.33
 -11   0   1    0.89    0.38
 -11   0   1    1.14    0.37
  11   0  -1    0.08    0.48
 -11   0   1    1.75    0.54
  11   0  -1    1.52    0.31
 -11   0   1    1.76    0.41
 -11   0   1    1.34    0.41
 -11   0   1    0.83    0.17
  11   0  -1    1.65    0.34
  11   0  -1    0.94    0.43
  11   0  -1    3.10    0.77
  11   0  -1    1.60    0.49
  11   0  -1    2.19    0.74
  10   0  -1    0.47    0.37
  10   0  -1    0.31    0.34
 -10   0   1    0.45    0.30
 -10   0   1    0.23    0.33
  10   0  -1    0.63    0.25
 -10   0   1    0.78    0.31
 -10   0   1    0.28    0.36
 -10   0   1    0.99    0.34
  10   0  -1    0.92    0.30
  10   0  -1    0.32    0.28
  10   0  -1    0.65    0.37
  10   0  -1    0.15    0.33
  10   0  -1    0.27    0.28
 -10   0   1    0.79    0.32
 -10   0   1   -0.10    0.30
  10   0  -1    0.18    0.23
 -10   0   1    0.47    0.37
 -10   0   1    0.55    0.33
 -10   0   1    0.37    0.15
   9   0  -1    0.08    0.31
  -9   0   1    0.03    0.27
  -9   0   1    0.43    0.27
  -9   0   1   -0.38    0.27
  -9   0   1    0.36    0.28
   9   0  -1    0.63    0.30
   9   0  -1    0.58    0.24
   9   0  -1    0.08    0.27
  -9   0   1    0.17    0.12
  -9   0   1    0.35    0.35
  -9   0   1    0.24    0.26
   9   0  -1    0.17    0.20
   9   0  -1    0.17    0.24
  -9   0   1    0.47    0.36
   9   0  -1    0.02    0.21
  -9   0   1    0.21    0.31
   9   0  -1   -0.07    0.30
   9   0  -1    0.92    0.32
  -9   0   1   -0.31    0.24
  -8   0   1    1.08    0.27
  -8   0   1    0.47    0.31
  -8   0   1    1.37    0.24
   8   0  -1    0.57    0.24
   8   0  -1    0.61    0.28
   8   0  -1    0.96    0.24
   8   0  -1    1.15    0.29
  -8   0   1    0.79    0.13
  -8   0   1    1.88    0.40
  -8   0   1    0.86    0.32
  -8   0   1    0.79    0.22
  -8   0   1    0.91    0.25
  -8   0   1    0.99    0.24
  -8   0   1    1.06    0.24
   8   0  -1    0.82    0.22
   8   0  -1    0.53    0.17
   8   0  -1    1.25    0.30
   8   0  -1    0.81    0.22
   8   0  -1    1.22    0.20
  -7   0   1    1.90    0.27
   7   0  -1    1.05    0.30
  -7   0   1    0.85    0.19
  -7   0   1    0.51    0.11
  -7   0   1    1.05    0.21
   7   0  -1    0.68    0.18
   7   0  -1    0.80    0.23
  -7   0   1    1.25    0.21
  -7   0   1    0.94    0.21
   7   0  -1    0.56    0.14
   7   0  -1    0.97    0.22
  -6   0   1    1.61    0.27
   6   0  -1    0.86    0.17
   6   0  -1    0.82    0.13
  -6   0   1    1.26    0.18
   6   0  -1    1.16    0.16
  -6   0   1    0.96    0.21
  -6   0   1    0.63    0.18
   6   0  -1    0.78    0.18
  -6   0   1    1.05    0.21
   6   0  -1    1.33    0.17
  -6   0   1    0.56    0.19
  -6   0   1    1.12    0.18
   6   0  -1    0.48    0.19
   6   0  -1    0.90    0.16
  -6   0   1    0.96    0.12
  -6   0   1    0.98    0.17
  -6   0   1    1.08    0.17
  -5   0   1    0.74    0.09
   5   0  -1    0.58    0.13
  -5   0   1    0.17    0.16
  -5   0   1   -0.18    0.22
   5   0  -1    0.48    0.15
  -5   0   1    0.63    0.19
  -5   0   1    0.51    0.14
   5   0  -1    0.39    0.12
  -5   0   1    0.80    0.19
  -5   0   1    0.54    0.13
  -5   0   1    0.25    0.13
   5   0  -1    0.75    0.14
   5   0  -1    0.45    0.09
  -5   0   1    0.17    0.22
  -5   0   1    0.77    0.16
   5   0  -1    0.72    0.21
   5   0  -1    0.68    0.12
   4   0  -1    0.27    0.08
  -4   0   1    0.20    0.13
   4   0  -1    0.17    0.11
  -4   0   1    0.85    0.18
  -4   0   1    0.54    0.13
  -4   0   1    0.43    0.13
   4   0  -1    0.48    0.12
   4   0  -1   -0.02    0.13
   4   0  -1    0.30    0.12
  -4   0   1    0.56    0.15
  -4   0   1    0.71    0.15
  -4   0   1    0.91    0.15
  -4   0   1    0.34    0.15
  -4   0   1    0.63    0.08
   4   0  -1    0.41    0.12
  -4   0   1    0.41    0.13
   4   0  -1    0.26    0.11
  -3   0   1    0.82    0.11
   3   0  -1    0.66    0.12
   3   0  -1    0.98    0.16
  -3   0   1    1.17    0.12
  -3   0   1    0.88    0.14
  -3   0   1    1.16    0.14
  -3   0   1    0.96    0.14
   3   0  -1    0.62    0.11
  -3   0   1    0.48    0.12
  -3   0   1    0.71    0.12
  -3   0   1    0.84    0.12
   3   0  -1    0.77    0.12
   3   0  -1    0.54    0.11
   3   0  -1    0.66    0.13
  -3   0   1    0.81    0.11
  -2   0   1   -0.06    0.07
   2   0  -1   -0.21    0.06
   2   0  -1   -0.17    0.05
   2   0  -1   -0.11    0.06
   2   0  -1    0.06    0.06
  -2   0   1   -0.04    0.09
   2   0  -1   -0.05    0.06
  -2   0   1    0.03    0.06
   2   0  -1   -0.03    0.05
  -2   0   1    0.05    0.06
  -2   0   1   -0.08    0.09
   2   0  -1   -0.05    0.05
  -2   0   1   -0.15    0.05
  -2   0   1   -0.04    0.06
  -2   0   1   -0.22    0.06
   1   0   1    0.18    0.04
  -1   0  -1    0.13    0.04
  -1   0  -1   -0.01    0.03
  -1   0  -1    0.16    0.04
  -1   0  -1   -0.02    0.03
   1   0   1    0.09    0.04
   1   0   1    0.11    0.04
   1   0   1    0.10    0.04
   1   0   1    0.12    0.04
  -1   0  -1    0.06    0.03
  -1   0  -1   -0.01    0.03
  -1   0  -1    0.15    0.03
  -2   0  -1    0.16    0.08
   2   0   1    0.00    0.07
  -2   0  -1    0.22    0.06
  -2   0  -1    0.08    0.06
  -2   0  -1    0.27    0.06
  -2   0  -1    0.15    0.07
  -2   0  -1    0.10    0.04
   2   0   1   -0.05    0.06
   2   0   1    0.05    0.06
  -2   0  -1    0.11    0.06
   2   0   1    0.06    0.03
   2   0   1    0.16    0.06
  -2   0  -1    0.36    0.11
   2   0   1    0.14    0.06
  -2   0  -1    0.27    0.08
   2   0   1    0.07    0.07
  -2   0  -1    0.02    0.07
  -3   0  -1    2.08    0.16
  -3   0  -1    1.91    0.16
   3   0   1    2.24    0.19
  -3   0  -1    2.09    0.18
   3   0   1    2.31    0.16
   3   0   1    1.83    0.13
   3   0   1    2.15    0.16
  -3   0  -1    2.12    0.16
   3   0   1    1.69    0.19
  -3   0  -1    1.93    0.18
  -3   0  -1    2.07    0.19
  -3   0  -1    1.95    0.14
   3   0   1    2.15    0.18
   3   0   1    1.73    0.17
  -3   0  -1    2.01    0.18
   4   0   1    0.39    0.13
   4   0   1    0.60    0.08
  -4   0  -1    0.68    0.16
  -4   0  -1    0.41    0.10
  -4   0  -1    0.59    0.14
   4   0   1    0.18    0.10
   4   0   1    0.59    0.15
  -4   0  -1    0.55    0.12
   4   0   1    0.47    0.11
  -4   0  -1    0.63    0.12
  -4   0  -1    0.56    0.12
  -4   0  -1    0.39    0.13
   4   0   1    0.40    0.17
  -4   0  -1    0.55    0.16
  -4   0  -1    0.69    0.10
   4   0   1    0.74    0.14
   4   0   1    0.49    0.16
   4   0   1    0.58    0.11
   5   0   1    1.24    0.20
  -5   0  -1    1.27    0.16
   5   0   1    1.12    0.18
  -5   0  -1    1.16    0.14
  -5   0  -1    1.80    0.21
   5   0   1    0.86    0.14
  -5   0  -1    1.49    0.19
  -5   0  -1    0.74    0.18
   5   0   1    0.79    0.16
   5   0   1    1.19    0.18
  -5   0  -1    0.79    0.18
   5   0   1    0.75    0.15
  -5   0  -1    1.09    0.16
   5   0   1    1.04    0.20
   5   0   1    1.05    0.13
  -5   0  -1    1.19    0.16
   5   0   1    1.13    0.14
  -5   0  -1    0.94    0.15
  -6   0  -1    1.81    0.35
   6   0   1    0.99    0.16
   6   0   1    1.57    0.24
   6   0   1    0.88    0.21
  -6   0  -1    1.41    0.19
   6   0   1    1.20    0.16
  -6   0  -1    0.94    0.19
  -6   0  -1    1.26    0.16
  -6   0  -1    1.47    0.18
  -6   0  -1    1.13    0.23
   6   0   1    1.03    0.21
  -6   0  -1    1.47    0.19
  -6   0  -1    1.37    0.21
   6   0   1    1.30    0.16
   6   0   1    0.67    0.23
   6   0   1    1.23    0.18
  -6   0  -1    1.84    0.24
  -7   0  -1    2.18    0.32
   7   0   1    2.15    0.29
   7   0   1    3.05    0.35
   7   0   1    2.22    0.22
  -7   0  -1    2.67    0.26
   7   0   1    2.34    0.27
   7   0   1    2.30    0.32
  -7   0  -1    3.00    0.26
   7   0   1    2.06    0.29
  -7   0  -1    2.38    0.32
  -7   0  -1    3.03    0.24
  -7   0  -1    2.62    0.32
   7   0   1    2.60    0.35
  -7   0  -1    2.65    0.32
   7   0   1    2.42    0.26
  -7   0  -1    2.43    0.33
   7   0   1    2.18    0.32
  -7   0  -1    2.64    0.25
  -8   0  -1    0.51    0.23
   8   0   1    0.61    0.28
  -8   0  -1    0.46    0.23
   8   0   1    0.30    0.30
  -8   0  -1    0.86    0.26
  -8   0  -1    0.89    0.20
   8   0   1    0.70    0.21
   8   0   1    0.57    0.21
   8   0   1    0.87    0.17
   8   0   1    1.00    0.32
  -8   0  -1    0.88    0.31
  -8   0  -1    1.05    0.29
  -8   0  -1    0.87    0.18
   8   0   1    0.53    0.29
  -8   0  -1    1.55    0.32
  -8   0  -1    0.76    0.24
   8   0   1    0.75    0.23
   8   0   1    0.91    0.27
  -9   0  -1    0.30    0.32
  -9   0  -1    0.10    0.19
   9   0   1    0.12    0.22
  -9   0  -1    0.47    0.28
  -9   0  -1   -0.06    0.26
  -9   0  -1    0.11    0.26
   9   0   1    0.52    0.30
  -9   0  -1    0.15    0.26
   9   0   1   -0.31    0.44
   9   0   1    0.42    0.37
   9   0   1    0.14    0.31
   9   0   1   -0.30    0.22
   9   0   1    0.20    0.17
   9   0   1   -0.07    0.36
  -9   0  -1    0.04    0.31
  -9   0  -1    0.30    0.27
   9   0   1    0.49    0.30
  -9   0  -1    0.28    0.26
  10   0   1   -0.30    0.27
 -10   0  -1    0.21    0.39
 -10   0  -1    0.24    0.27
  10   0   1    0.28    0.42
 -10   0  -1    0.16    0.34
 -10   0  -1    0.31    0.32
 -10   0  -1   -0.08    0.36
  10   0   1    0.49    0.38
 -10   0  -1   -0.31    0.28
 -10   0  -1    0.16    0.27
  10   0   1    0.38    0.27
  10   0   1    0.17    0.43
  10   0   1   -0.08    0.36
 -10   0  -1   -0.28    0.37
  10   0   1   -0.52    0.65
 -10   0  -1    0.01    0.28
  10   0   1   -0.23    0.30
 -10   0  -1    0.06    0.45
  11   0   1    0.26    0.43
  11   0   1   -0.08    0.35
  11   0   1   -0.04    0.49
 -11   0  -1   -0.32    0.32
 -11   0  -1    0.24    0.70
 -11   0  -1    0.02    0.51
  11   0   1    0.13    0.33
 -11   0  -1   -0.20    0.43
  11   0   1   -0.67    0.44
 -11   0  -1   -0.05    0.30
 -11   0  -1    0.20    0.39
  11   0   1   -0.15    0.40
 -11   0  -1   -0.26    0.41
  11   0   1    0.25    0.32
 -11   0  -1   -0.14    0.24
 -11   0  -1    0.20    0.35
 -11   0  -1   -0.01    0.38
  11   0   1    0.07    0.23
 -11   0  -1   -0.55    0.43
  11   0   1   -0.33    0.42
 -12   0  -1   -0.17    0.49
  12   0   1   -0.08    0.26
  12   0   1    0.16    0.89
 -12   0  -1   -0.02    0.52
 -12   0  -1   -0.21    0.49
  12   0   1   -0.13    0.42
 -12   0  -1    0.36    0.62
 -12   0  -1   -0.56    0.49
 -12   0  -1    0.49    0.28
  12   0   1    0.08    0.37
  12   0   1    0.32    0.57
  12   0   1    0.35    0.39
  12   0   1    0.17    0.58
 -12   0  -1    0.96    0.51
  12   0   1   -0.01    0.51
 -12   0  -1   -0.23    0.46
 -12   0  -1   -0.01    0.38
 -12   0  -1   -0.30    0.42
  12   0   1   -0.11    0.49
 -12   0  -1    0.76    0.36
 -13   0  -1    0.25    0.55
 -13   0  -1    0.16    0.62
  13   0   1   -0.28    0.31
  13   0   1    0.24    0.49
 -13   0  -1   -0.49    0.54
 -13   0  -1   -0.39    0.30
 -13   0  -1    0.19    0.44
 -13   0  -1    0.54    0.88
 -13   0  -1   -0.53    0.47
 -13   0  -1   -0.56    0.54
  13   0   1    0.02    0.61
 -13   0  -1   -0.05    0.50
  13   0   1    0.32    0.62
 -13   0  -1   -0.12    0.64
  13   0   1   -0.23    0.69
  13   0   1   -0.10    0.43
  13   0   1   -0.21    0.58
 -13   0  -1   -0.46    0.63
  13   0   1   -0.08    0.44
  13   0   1   -0.38    0.69
  14   0   1    0.41    0.79
 -14   0  -1   -1.00    0.64
  14   0   1    0.07    0.52
 -14   0  -1    0.29    0.69
 -14   0  -1   -0.14    0.36
 -14   0  -1   -0.11    0.65
 -14   0  -1   -0.51    0.76
  14   0   1    0.04    0.73
 -14   0  -1   -1.05    0.64
 -14   0  -1    0.37    0.50
  14   0   1    0.24    0.72
 -14   0  -1    0.10    0.78
  14   0   1    0.06    0.35
  14   0   1    0.57    0.75
  14   0   1    0.06    0.81
 -14   0  -1   -0.36    0.64
  14   0   1   -0.04    0.50
 -14   0  -1   -0.48    0.59
 -14   0  -1   -0.21    0.57
 -15   0  -1   -0.21    0.66
 -15   0  -1    0.02    0.72
  15   0   1    0.03    0.85
  15   0   1   -0.05    0.60
  15   0   1   -0.07    0.62
 -15   0  -1   -0.65    0.81
  15   0   1    0.05    0.89
 -15   0  -1   -0.45    0.77
 -15   0  -1   -0.15    0.75
  15   0   1   -1.23    1.44
 -15   0  -1    0.22    0.81
 -15   0  -1   -0.18    0.80
  15   0   1   -0.35    1.41
 -15   0  -1    0.81    0.95
 -15   0  -1    0.26    0.61
 -15   0  -1    0.42    0.93
  15   0   1    0.87    1.22
 -15  -1   1    0.16    0.73
 -15  -1   1   -0.03    0.88
  15  -1  -1    0.19    0.62
 -15  -1   1    0.88    0.79
 -15  -1   1    0.27    0.63
  15  -1  -1    0.76    0.52
 -15  -1   1   -0.39    0.72
  15  -1  -1   -0.06    0.64
  15  -1  -1    0.52    1.09
 -15  -1   1    0.34    0.87
 -15  -1   1    0.37    0.72
  15  -1  -1    0.43    1.00
  15  -1  -1    0.20    0.85
  15  -1  -1    0.47    0.79
 -15  -1   1    0.96    0.72
  15  -1  -1   -0.24    1.01
 -15  -1   1    0.36    0.74
 -15   1   1    0.21    0.76
  15   1  -1    0.38    0.86
 -15   1   1    0.53    0.73
 -15   1   1   -0.12    0.75
 -15   1   1    0.65    0.69
  15   1  -1    0.03    0.86
 -15   1   1    0.11    0.68
  15   1  -1    0.14    0.57
 -15   1   1    0.78    0.92
  15   1  -1   -0.43    0.87
  15   1  -1    0.29    0.55
 -15   1   1    0.52    0.73
 -15   1   1    0.11    0.61
  15   1  -1    1.18    1.06
 -15   1   1    0.27    0.74
  15   1  -1    0.50    0.48
 -15   1   1    0.99    0.90
  14  -1  -1    0.03    0.61
 -14  -1   1    0.31    0.63
 -14  -1   1    0.03    0.77
 -14  -1   1   -0.33    0.55
  14  -1  -1    0.20    0.52
 -14  -1   1   -0.07    0.59
 -14  -1   1   -0.17    0.60
  14  -1  -1   -0.31    0.79
  14  -1  -1    0.27    0.69
 -14  -1   1   -0.36    0.63
  14  -1  -1    0.04    0.53
  14  -1  -1    0.36    0.44
  14  -1  -1    0.67    0.82
  14  -1  -1    0.13    0.68
 -14  -1   1   -0.92    0.75
 -14  -1   1    0.41    0.55
 -14  -1   1   -0.38    0.59
 -14   1   1   -0.54    0.61
 -14   1   1   -0.30    0.59
  14   1  -1   -0.13    0.72
  14   1  -1   -0.33    0.69
  14   1  -1    0.24    0.41
 -14   1   1    0.53    0.64
  14   1  -1    0.01    0.72
  14   1  -1    0.45    0.74
 -14   1   1   -0.41    0.58
  14   1  -1   -0.01    0.48
 -14   1   1   -0.59    0.81
  14   1  -1   -0.46    0.46
 -14   1   1    0.21    0.58
 -14   1   1   -0.04    0.60
 -14   1   1    0.26    0.83
  14   1  -1    0.29    0.68
 -14   1   1   -0.30    0.60
 -13  -1   1   10.92    1.01
 -13  -1   1   10.91    1.04
 -13  -1   1   10.79    1.01
  13  -1  -1   13.00    0.82
 -13  -1   1   12.29    0.92
 -13  -1   1   10.46    0.96
  13  -1  -1   11.62    0.86
 -13  -1   1   11.55    0.88
 -13  -1   1   13.46    1.06
  13  -1  -1   11.67    0.91
  13  -1  -1   10.74    0.91
 -13  -1   1   11.80    1.02
  13  -1  -1   13.38    1.01
 -13  -1   1   11.03    0.89
  13  -1  -1   10.77    1.05
  13   1  -1   10.65    1.07
  13   1  -1   11.11    1.04
  13   1  -1   11.89    0.84
 -13   1   1   12.12    1.00
 -13   1   1   12.02    0.94
 -13   1   1   13.42    1.02
 -13   1   1   11.45    1.13
 -13   1   1   10.71    1.01
  13   1  -1   11.72    1.09
  13   1  -1   10.47    0.82
 -13   1   1   13.41    1.01
 -13   1   1   11.60    1.13
 -13   1   1   11.63    0.99
 -13   1   1   11.36    0.99
  13   1  -1   11.61    0.83
 -12  -1   1   18.89    1.31
 -12  -1   1   17.98    1.25
 -12  -1   1   20.02    1.35
 -12  -1   1   17.96    1.31
 -12  -1   1   19.27    1.26
 -12  -1   1   18.24    1.37
 -12  -1   1   18.32    1.33
  12  -1  -1   21.21    1.20
  12  -1  -1   21.17    1.31
  12  -1  -1   20.97    1.34
 -12  -1   1   19.58    1.29
  12  -1  -1   21.68    1.33
  12  -1  -1   19.67    1.36
  12  -1  -1   22.11    1.32
  12  -1  -1   20.62    1.22
 -12  -1   1   18.92    1.26
 -12   1   1   19.62    1.30
 -12   1   1   19.31    1.31
 -12   1   1   18.86    1.32
  12   1  -1   20.22    1.37
  12   1  -1   20.25    1.31
 -12   1   1   21.60    1.31
 -12   1   1   17.45    1.32
 -12   1   1   19.52    1.31
  12   1  -1   18.29    1.30
 -12   1   1   19.92    1.33
  12   1  -1   19.04    1.20
 -12   1   1   19.21    1.15
  12   1  -1   18.25    1.20
 -12   1   1   17.59    1.29
  12   1  -1   20.74    1.34
  12   1  -1   19.57    1.21
 -12   1   1   20.29    1.27
  11  -1  -1    6.13    0.54
 -11  -1   1    6.29    0.55
  11  -1  -1    6.31    0.76
  11  -1  -1    6.25    0.51
  11  -1  -1    6.82    0.55
 -11  -1   1    5.48    0.65
  11  -1  -1    5.06    0.65
 -11  -1   1    6.31    0.54
 -11  -1   1    6.24    0.65
 -11  -1   1    6.93    0.65
 -11  -1   1    6.50    0.62
 -11  -1   1    5.47    0.58
 -11  -1   1    6.02    0.64
  11  -1  -1    5.93    0.67
 -11  -1   1    5.39    0.62
 -11   1   1    5.70    0.44
  11   1  -1    6.92    0.65
 -11   1   1    6.46    0.66
  11   1  -1    7.81    0.84
 -11   1   1    6.08    0.65
  11   1  -1    6.27    0.51
  11   1  -1    5.83    0.67
  11   1  -1    6.38    0.53
  11   1  -1    5.45    0.65
 -11   1   1    8.75    0.86
  11   1  -1    5.10    0.68
 -11   1   1    6.35    0.65
 -11   1   1    7.26    0.64
 -11   1   1    6.53    0.66
  11   1  -1    5.68    0.51
 -11   1   1    6.02    0.69
 -11   1   1    6.15    0.62
 -11   1   1    7.44    0.60
  10  -1  -1    3.64    0.55
  10  -1  -1    2.50    0.36
 -10  -1   1    3.04    0.38
 -10  -1   1    2.98    0.39
 -10  -1   1    2.45    0.45
  10  -1  -1    2.52    0.41
 -10  -1   1    2.28    0.35
  10  -1  -1    2.38    0.33
  10  -1  -1    2.97    0.50
 -10  -1   1    2.27    0.35
  10  -1  -1    1.64    0.36
  10  -1  -1    2.13    0.28
 -10  -1   1    1.70    0.35
 -10  -1   1    3.39    0.43
 -10  -1   1    1.91    0.43
 -10  -1   1    2.22    0.37
 -10   1   1    3.81    0.52
 -10   1   1    2.85    0.38
 -10   1   1    3.39    0.42
 -10   1   1    2.22    0.27
  10   1  -1    2.21    0.41
  10   1  -1    2.41    0.43
 -10   1   1    2.39    0.40
  10   1  -1    2.21    0.31
  10   1  -1    1.86    0.31
 -10   1   1    3.88    0.44
 -10   1   1    2.61    0.39
 -10   1   1    3.63    0.52
 -10   1   1    2.84    0.52
 -10   1   1    2.26    0.37
  10   1  -1    2.61    0.42
  10   1  -1    1.69    0.41
  10   1  -1    2.57    0.40
  10   1  -1    2.42    0.32
  -9  -1   1   23.48    1.43
  -9  -1   1   23.88    1.42
  -9  -1   1   24.72    1.43
  -9  -1   1   22.60    1.42
   9  -1  -1   22.51    1.44
   9  -1  -1   21.14    1.44
   9  -1  -1   21.53    1.45
   9  -1  -1   23.18    1.38
  -9  -1   1   23.37    1.40
  -9  -1   1   24.43    1.39
   9  -1  -1   24.03    1.42
   9  -1  -1   24.66    1.39
  -9  -1   1   24.14    1.39
  -9  -1   1   22.18    1.34
   9  -1  -1   22.68    1.36
  -9  -1   1   24.27    1.43
  -9  -1   1   24.27    1.39
   9  -1  -1   22.36    1.38
  -9   1   1   22.43    1.42
  -9   1   1   24.39    1.42
   9   1  -1   25.00    1.43
   9   1  -1   21.82    1.37
   9   1  -1   25.15    1.43
   9   1  -1   21.89    1.41
   9   1  -1   23.10    1.37
  -9   1   1   23.05    1.42
   9   1  -1   23.06    1.43
  -9   1   1   25.62    1.40
  -9   1   1   23.58    1.40
  -9   1   1   23.07    1.35
  -9   1   1   25.09    1.40
  -9   1   1   22.75    1.41
  -9   1   1   24.48    1.43
  -9   1   1   24.91    1.43
   9   1  -1   23.60    1.44
   9   1  -1   24.32    1.38
  -8  -1   1    1.68    0.28
   8  -1  -1    1.42    0.27
  -8  -1   1    0.93    0.24
   8  -1  -1    0.60    0.36
  -8  -1   1    0.99    0.28
  -8  -1   1    0.91    0.13
   8  -1  -1    1.18    0.23
  -8  -1   1    1.16    0.31
  -8  -1   1    1.06    0.25
   8  -1  -1    0.78    0.27
   8  -1  -1    1.33    0.35
   8  -1  -1    1.54    0.19
   8  -1  -1    1.07    0.24
   8  -1  -1    1.22    0.23
   8  -1  -1    1.45    0.24
  -8  -1   1    1.49    0.28
  -8  -1   1    0.96    0.23
  -8  -1   1    1.85    0.32
  -8  -1   1    0.90    0.23
   8   1  -1    0.79    0.20
  -8   1   1    1.22    0.25
   8   1  -1    0.84    0.28
  -8   1   1    1.13    0.25
  -8   1   1    1.42    0.26
  -8   1   1    1.01    0.24
   8   1  -1    1.13    0.22
   8   1  -1    1.40    0.27
   8   1  -1    1.80    0.38
  -8   1   1    1.17    0.26
   8   1  -1    1.16    0.29
   8   1  -1    1.47    0.28
  -8   1   1    1.27    0.32
  -8   1   1    1.19    0.25
  -8   1   1    1.37    0.18
  -8   1   1    1.05    0.32
   8   1  -1    0.93    0.19
  -8   1   1    0.75    0.25
   7  -1  -1   32.89    1.99
   7  -1  -1   34.77    2.03
  -7  -1   1   37.58    2.02
  -7  -1   1   33.89    2.03
   7  -1  -1   34.39    2.04
  -7  -1   1   35.40    2.02
  -7  -1   1   36.01    2.03
  -7  -1   1   36.44    2.01
  -7  -1   1   34.68    2.02
   7  -1  -1   33.93    2.04
  -7  -1   1   34.48    2.02
  -7  -1   1   34.99    2.01
  -7  -1   1   35.20    2.04
  -7  -1   1   34.40    1.99
   7  -1  -1   35.16    2.01
   7  -1  -1   33.72    2.01
  -7   1   1   35.78    2.02
  -7   1   1   34.82    2.02
  -7   1   1   36.39    2.03
  -7   1   1   35.61    1.99
  -7   1   1   35.01    2.03
  -7   1   1   35.14    2.03
  -7   1   1   37.21    2.05
  -7   1   1   33.84    2.02
  -7   1   1   34.81    2.04
   7   1  -1   34.99    2.04
   7   1  -1   34.87    2.00
   7   1  -1   36.15    2.00
   7   1  -1   34.06    2.02
   7   1  -1   36.78    2.04
   7   1  -1   37.06    2.03
   7   1  -1   35.95    2.07
   7   1  -1   34.29    2.02
  -7   1   1   35.88    2.02
  -6  -1   1    9.74    0.60
   6  -1  -1    9.61    0.59
  -6  -1   1   10.32    0.63
  -6  -1   1   10.10    0.61
   6  -1  -1   10.92    0.65
   6  -1  -1    9.72    0.64
   6  -1  -1    9.86    0.65
   6  -1  -1   10.77    0.63
  -6  -1   1   10.77    0.63
  -6  -1   1   10.21    0.62
   6  -1  -1    9.91    0.62
  -6  -1   1    9.28    0.58
   6  -1  -1   11.14    0.66
   6  -1  -1    9.69    0.62
  -6  -1   1   10.19    0.62
  -6  -1   1    9.20    0.64
  -6  -1   1   10.52    0.63
  -6  -1   1    9.85    0.64
   6  -1  -1    8.95    0.62
  -6   1   1    9.37    0.63
  -6   1   1    9.73    0.64
   6   1  -1    9.46    0.63
   6   1  -1   10.48    0.60
  -6   1   1   10.52    0.62
  -6   1   1   10.30    0.64
   6   1  -1    9.52    0.62
  -6   1   1   10.09    0.65
  -6   1   1   10.09    0.62
  -6   1   1   10.46    0.59
   6   1  -1    9.20    0.64
  -6   1   1    9.97    0.62
  -6   1   1    9.19    0.62
   6   1  -1    9.75    0.62
   6   1  -1    9.84    0.59
   6   1  -1    9.77    0.61
  -6   1   1   10.10    0.63
  -5  -1   1   38.91    2.12
  -5  -1   1   37.31    2.12
  -5  -1   1   37.96    2.12
  -5  -1   1   36.51    2.12
  -5  -1   1   37.42    2.13
   5  -1  -1   37.45    2.14
  -5  -1   1   36.63    2.12
   5  -1  -1   35.82    2.13
   5  -1  -1   36.82    2.11
  -5  -1   1   40.36    2.15
   5  -1  -1   39.71    2.14
  -5  -1   1   36.73    2.14
   5  -1  -1   37.14    2.13
   5  -1  -1   37.51    2.14
   5  -1  -1   36.78    2.13
  -5  -1   1   36.45    2.12
  -5  -1   1   34.16    2.10
   5  -1  -1   35.68    2.14
   5   1  -1   37.45    2.12
  -5   1   1   36.96    2.13
   5   1  -1   34.80    2.12
  -5   1   1   37.70    2.12
  -5   1   1   37.12    2.13
  -5   1   1   37.00    2.12
  -5   1   1   38.99    2.13
  -5   1   1   38.40    2.14
   5   1  -1   37.26    2.11
  -5   1   1   38.13    2.11
   5   1  -1   38.35    2.13
   5   1  -1   37.99    2.11
  -5   1   1   37.73    2.13
   5   1  -1   37.46    2.13
  -5   1   1   39.56    2.14
   5   1  -1   37.19    2.14
   5   1  -1   36.44    2.12
  -4  -1   1  271.50   16.27
  -4  -1   1  286.78   16.29
  -4  -1   1  303.63   16.29
  -4  -1   1  288.72   16.27
  -4  -1   1  293.19   16.28
   4  -1  -1  281.90   16.27
   4  -1  -1  297.73   16.29
  -4  -1   1  283.96   16.28
   4  -1  -1  297.57   16.29
   4  -1  -1  295.36   16.28
   4  -1  -1  291.57   16.28
   4  -1  -1  287.72   16.28
  -4  -1   1  283.28   16.28
  -4  -1   1  289.98   16.27
   4  -1  -1  300.71   16.29
   4  -1  -1  284.95   16.28
  -4  -1   1  282.99   16.28
  -4  -1   1  300.10   16.28
   4  -1  -1  291.16   16.29
  -4   1   1  290.61   16.28
   4   1  -1  291.43   16.28
   4   1  -1  287.83   16.29
  -4   1   1  292.90   16.27
  -4   1   1  302.32   16.28
  -4   1   1  283.71   16.28
   4   1  -1  288.40   16.27
  -4   1   1  289.04   16.28
  -4   1   1  301.11   16.29
  -4   1   1  289.80   16.28
   4   1  -1  271.57   16.28
  -4   1   1  287.19   16.29
   4   1  -1  290.42   16.28
   4   1  -1  292.69   16.29
   4   1  -1  271.94   16.28
  -4   1   1  290.66   16.29
  -4   1   1  309.33   16.29
   4   1  -1  297.47   16.27
  -3  -1   1    6.25    0.38
   3  -1  -1    6.40    0.37
  -3  -1   1    6.07    0.37
   3  -1  -1    5.92    0.38
   3  -1  -1    7.16    0.40
  -3  -1   1    5.97    0.38
  -3  -1   1    6.06    0.37
   3  -1  -1    6.99    0.39
   3  -1  -1    6.86    0.39
  -3  -1   1    6.05    0.38
   3  -1  -1    6.52    0.40
   3  -1  -1    6.27    0.39
  -3  -1   1    5.72    0.38
  -3  -1   1    6.41    0.39
   3  -1  -1    6.73    0.39
  -3  -1   1    6.03    0.39
   3  -1  -1    6.30    0.38
  -3   1   1    6.11    0.38
   3   1  -1    6.23    0.37
   3   1  -1    6.02    0.39
   3   1  -1    5.90    0.38
  -3   1   1    6.39    0.37
   3   1  -1    6.65    0.38
  -3   1   1    6.39    0.39
  -3   1   1    6.65    0.40
  -3   1   1    6.70    0.38
  -3   1   1    6.49    0.39
   3   1  -1    5.60    0.38
  -3   1   1    6.77    0.39
   3   1  -1    6.25    0.37
  -3   1   1    6.19    0.38
  -3   1   1    6.05    0.38
   3   1  -1    5.94    0.39
   3   1  -1    5.45    0.38
  -3   1   1    5.87    0.40
   2  -1  -1   22.65    1.23
   2  -1  -1   22.11    1.22
  -2  -1   1   23.52    1.22
  -2  -1   1   21.22    1.22
   2  -1  -1   22.08    1.22
  -2  -1   1   21.73    1.21
  -2  -1   1   20.16    1.22
   2  -1  -1   23.77    1.22
   2  -1  -1   21.85    1.22
   2  -1  -1   21.82    1.22
   2  -1  -1   21.41    1.22
   2  -1  -1   22.07    1.21
   2  -1  -1   22.64    1.23
  -2  -1   1   20.74    1.21
   2  -1  -1   21.98    1.23
  -2  -1   1   20.67    1.21
  -2  -1   1   21.88    1.22
  -2  -1   1   19.80    1.22
  -2  -1   1   20.68    1.22
   2   1  -1   19.97    1.21
  -2   1   1   21.07    1.22
  -2   1   1   22.96    1.23
  -2   1   1   20.73    1.22
   2   1  -1   20.21    1.22
  -2   1   1   21.59    1.22
   2   1  -1   20.30    1.21
  -2   1   1   22.11    1.23
   2   1  -1   22.83    1.22
  -2   1   1   21.54    1.22
  -2   1   1   21.85    1.22
  -2   1   1   21.64    1.23
   2   1  -1   20.39    1.22
  -2   1   1   22.10    1.22
  -2   1   1   22.00    1.22
   2   1  -1   20.10    1.21
   2   1  -1   21.57    1.22
   2   1  -1   20.35    1.21
  -1  -1   1   55.57    2.96
   1  -1  -1   52.69    2.96
   1  -1  -1   53.07    2.96
  -1  -1   1   54.77    2.96
  -1  -1   1   57.75    2.97
  -1  -1   1   52.91    2.96
   1  -1  -1   53.32    2.96
  -1  -1   1   51.98    2.96
   1  -1  -1   50.95    2.96
   1  -1  -1   52.51    2.96
   1   1  -1   52.72    2.96
   1   1  -1   45.25    2.96
  -1   1   1   52.83    2.96
   1   1  -1   50.28    2.96
  -1   1   1   54.61    2.97
   1   1  -1   51.70    2.96
  -1   1   1   57.67    2.97
   1   1  -1   45.97    2.96
  -1   1   1   54.85    2.96
   0  -1  -1   15.59    0.91
   0  -1  -1   16.17    0.91
   0   1  -1   16.33    0.91
  -1  -1  -1  286.05   15.42
   1  -1   1  267.94   15.43
   1  -1   1  270.21   15.42
   1  -1   1  305.18   15.43
  -1  -1  -1  291.03   15.43
  -1  -1  -1  282.75   15.42
  -1  -1  -1  238.97   15.43
  -1   1  -1  246.27   15.42
  -1   1  -1  257.72   15.42
  -1   1  -1  303.12   15.43
   2  -1   1    2.40    0.16
  -2  -1  -1    2.05    0.16
  -2  -1  -1    2.02    0.18
   2  -1   1    2.04    0.17
  -2  -1  -1    2.22    0.15
  -2  -1  -1    2.35    0.14
   2  -1   1    2.22    0.16
  -2  -1  -1    2.17    0.14
   2  -1   1    2.48    0.17
   2  -1   1    2.13    0.17
  -2  -1  -1    1.77    0.18
   2  -1   1    2.26    0.15
  -2  -1  -1    2.38    0.18
   2  -1   1    2.30    0.17
   2  -1   1    1.93    0.17
   2  -1   1    2.34    0.17
  -2  -1  -1    2.21    0.15
   2  -1   1    2.10    0.18
  -2   1  -1    2.41    0.16
  -2   1  -1    2.71    0.17
   2   1   1    2.55    0.15
  -2   1  -1    2.24    0.16
  -2   1  -1    2.23    0.17
  -2   1  -1    2.14    0.15
  -2   1  -1    2.24    0.16
  -2   1  -1    2.65    0.17
   2   1   1    2.29    0.16
   2   1   1    2.04    0.14
   2   1   1    2.15    0.14
   2   1   1    2.19    0.19
   2   1   1    2.38    0.19
  -2   1  -1    1.98    0.18
  -2   1  -1    1.97    0.17
   2   1   1    2.27    0.15
  -2   1  -1    2.21    0.16
   3  -1   1   37.76    2.22
  -3  -1  -1   39.65    2.21
  -3  -1  -1   38.42    2.23
   3  -1   1   39.54    2.23
  -3  -1  -1   40.20    2.23
  -3  -1  -1   39.67    2.22
  -3  -1  -1   39.34    2.21
   3  -1   1   40.72    2.22
  -3  -1  -1   37.97    2.21
   3  -1   1   38.66    2.22
   3  -1   1   40.79    2.23
  -3  -1  -1   35.65    2.22
  -3  -1  -1   39.52    2.21
   3  -1   1   39.31    2.22
  -3  -1  -1   39.31    2.21
   3  -1   1   38.90    2.22
   3  -1   1   37.62    2.21
   3   1   1   40.77    2.21
  -3   1  -1   41.43    2.22
  -3   1  -1   38.43    2.21
   3   1   1   36.12    2.23
  -3   1  -1   39.06    2.22
   3   1   1   40.03    2.21
   3   1   1   36.72    2.22
  -3   1  -1   39.60    2.22
  -3   1  -1   38.37    2.22
   3   1   1   40.11    2.21
  -3   1  -1   40.24    2.21
   3   1   1   39.15    2.23
   3   1   1   39.53    2.21
  -3   1  -1   40.14    2.23
  -3   1  -1   41.24    2.23
   3   1   1   38.30    2.22
  -4  -1  -1    1.63    0.15
   4  -1   1    1.99    0.18
  -4  -1  -1    1.85    0.16
  -4  -1  -1    1.71    0.20
  -4  -1  -1    1.89    0.15
  -4  -1  -1    1.82    0.19
  -4  -1  -1    1.82    0.21
  -4  -1  -1    2.23    0.21
   4  -1   1    2.02    0.23
   4  -1   1    1.70    0.17
   4  -1   1    1.75    0.19
   4  -1   1    1.29    0.20
   4  -1   1    2.07    0.24
  -4  -1  -1    2.09    0.20
   4  -1   1    2.00    0.20
   4  -1   1    2.18    0.21
  -4  -1  -1    1.38    0.19
   4   1   1    1.73    0.22
   4   1   1    1.74    0.17
   4   1   1    1.85    0.15
   4   1   1    2.18    0.23
   4   1   1    1.70    0.21
   4   1   1    1.95    0.19
  -4   1  -1    2.17    0.20
  -4   1  -1    1.92    0.17
   4   1   1    1.91    0.19
  -4   1  -1    1.93    0.17
   4   1   1    2.05    0.17
  -4   1  -1    2.23    0.21
  -4   1  -1    1.82    0.18
  -4   1  -1    1.85    0.18
  -4   1  -1    2.05    0.22
  -4   1  -1    1.94    0.18
  -4   1  -1    1.51    0.24
   4   1   1    1.89    0.27
  -4   1  -1    1.90    0.22
  -5  -1  -1   43.93    2.49
   5  -1   1   41.86    2.47
   5  -1   1   44.55    2.48
   5  -1   1   45.75    2.49
   5  -1   1   45.56    2.48
  -5  -1  -1   43.08    2.47
  -5  -1  -1   43.32    2.47
  -5  -1  -1   44.42    2.48
   5  -1   1   42.36    2.47
  -5  -1  -1   44.42    2.48
   5  -1   1   44.79    2.49
   5  -1   1   42.71    2.49
  -5  -1  -1   43.96    2.49
   5  -1   1   42.86    2.49
  -5  -1  -1   41.05    2.47
   5  -1   1   43.85    2.49
  -5  -1  -1   44.15    2.49
  -5  -1  -1   41.79    2.47
   5   1   1   44.75    2.47
  -5   1  -1   44.48    2.49
   5   1   1   43.34    2.47
   5   1   1   44.32    2.48
   5   1   1   43.15    2.49
   5   1   1   42.21    2.50
  -5   1  -1   43.24    2.47
   5   1   1   44.43    2.47
  -5   1  -1   40.78    2.52
  -5   1  -1   45.83    2.47
  -5   1  -1   44.74    2.49
   5   1   1   44.70    2.49
   5   1   1   42.08    2.47
  -5   1  -1   44.62    2.49
  -5   1  -1   46.17    2.49
   5   1   1   41.92    2.48
   6  -1   1    7.99    0.50
  -6  -1  -1    7.79    0.49
  -6  -1  -1    6.69    0.43
   6  -1   1    7.56    0.45
   6  -1   1    6.11    0.49
   6  -1   1    6.04    0.44
  -6  -1  -1    5.58    0.47
   6  -1   1    6.76    0.45
   6  -1   1    6.15    0.45
  -6  -1  -1    7.03    0.44
  -6  -1  -1    6.77    0.45
   6  -1   1    7.38    0.49
  -6  -1  -1    7.75    0.47
   6  -1   1    7.21    0.49
  -6  -1  -1    7.43    0.44
  -6  -1  -1    6.81    0.48
  -6  -1  -1    6.71    0.48
  -6   1  -1    7.05    0.45
  -6   1  -1    7.35    0.44
  -6   1  -1    7.45    0.49
  -6   1  -1    6.80    0.49
   6   1   1    7.34    0.43
   6   1   1    7.27    0.47
   6   1   1    6.98    0.43
   6   1   1    7.26    0.49
   6   1   1    6.21    0.48
  -6   1  -1    6.72    0.46
   6   1   1    6.56    0.50
  -6   1  -1    7.17    0.48
  -6   1  -1    7.80    0.46
   6   1   1    6.85    0.43
  -6   1  -1    6.84    0.49
   6   1   1    7.13    0.51
   6   1   1    6.14    0.48
  -7  -1  -1   18.91    1.15
   7  -1   1   18.55    1.16
   7  -1   1   18.06    1.13
   7  -1   1   21.39    1.18
   7  -1   1   18.45    1.18
  -7  -1  -1   18.24    1.12
  -7  -1  -1   19.39    1.12
  -7  -1  -1   20.05    1.16
   7  -1   1   18.99    1.13
  -7  -1  -1   18.66    1.16
   7  -1   1   19.46    1.13
  -7  -1  -1   19.39    1.15
  -7  -1  -1   19.71    1.13
   7  -1   1   18.72    1.17
  -7  -1  -1   19.71    1.13
  -7  -1  -1   18.65    1.16
   7  -1   1   19.16    1.12
   7   1   1   19.85    1.15
  -7   1  -1   20.04    1.13
  -7   1  -1   20.19    1.17
   7   1   1   18.63    1.12
   7   1   1   18.40    1.15
  -7   1  -1   18.84    1.16
  -7   1  -1   20.09    1.16
  -7   1  -1   19.49    1.14
   7   1   1   19.55    1.17
  -7   1  -1   21.09    1.16
   7   1   1   19.16    1.12
  -7   1  -1   18.94    1.14
  -7   1  -1   20.09    1.12
   7   1   1   17.89    1.15
   7   1   1   20.51    1.17
   7   1   1   19.64    1.12
  -8  -1  -1    4.95    0.38
   8  -1   1    5.01    0.43
   8  -1   1    4.89    0.48
  -8  -1  -1    4.61    0.46
   8  -1   1    5.25    0.49
   8  -1   1    5.09    0.42
  -8  -1  -1    5.62    0.40
  -8  -1  -1    4.96    0.38
   8  -1   1    5.76    0.48
  -8  -1  -1    4.88    0.47
  -8  -1  -1    5.64    0.46
   8  -1   1    5.24    0.38
   8  -1   1    5.64    0.55
  -8  -1  -1    5.07    0.46
   8  -1   1    4.32    0.55
  -8  -1  -1    4.64    0.40
   8  -1   1    5.33    0.41
  -8  -1  -1    4.55    0.45
  -8   1  -1    5.22    0.44
  -8   1  -1    5.60    0.46
  -8   1  -1    5.31    0.44
   8   1   1    4.98    0.49
   8   1   1    5.25    0.49
   8   1   1    5.36    0.44
   8   1   1    5.24    0.38
  -8   1  -1    5.20    0.44
  -8   1  -1    4.94    0.47
   8   1   1    4.61    0.43
  -8   1  -1    4.87    0.46
   8   1   1    4.50    0.45
   8   1   1    4.80    0.36
  -8   1  -1    6.53    0.51
  -8   1  -1    4.90    0.40
   8   1   1    4.71    0.39
   8   1   1    4.60    0.48
  -8   1  -1    5.26    0.51
   9  -1   1   10.98    0.76
  -9  -1  -1    9.87    0.73
  -9  -1  -1    9.15    0.75
  -9  -1  -1    8.99    0.73
   9  -1   1   10.84    0.70
  -9  -1  -1   11.49    0.74
   9  -1   1   12.86    0.86
  -9  -1  -1    9.17    0.72
  -9  -1  -1   10.10    0.74
  -9  -1  -1   10.16    0.65
   9  -1   1   10.37    0.70
   9  -1   1    9.50    0.75
   9  -1   1    9.63    0.69
  -9  -1  -1   10.92    0.68
   9  -1   1   10.45    0.65
  -9  -1  -1   10.80    0.68
   9   1   1   10.09    0.64
  -9   1  -1    9.52    0.73
  -9   1  -1   10.93    0.70
  -9   1  -1   10.36    0.73
   9   1   1    9.73    0.66
   9   1   1   10.23    0.67
   9   1   1   11.14    0.77
  -9   1  -1   10.33    0.69
  -9   1  -1   10.17    0.69
  -9   1  -1    9.23    0.73
   9   1   1   10.23    0.78
   9   1   1   10.47    0.74
   9   1   1    9.85    0.77
   9   1   1   10.60    0.74
  -9   1  -1   11.42    0.75
   9   1   1    9.02    0.88
  -9   1  -1   10.41    0.65
  -9   1  -1    9.73    0.74
  10  -1   1   12.70    0.82
 -10  -1  -1   12.96    0.88
  10  -1   1   12.41    0.88
 -10  -1  -1   11.83    0.87
 -10  -1  -1   11.39    0.79
  10  -1   1   11.36    0.83
 -10  -1  -1   12.12    0.80
 -10  -1  -1   11.88    0.88
 -10  -1  -1   12.07    0.89
 -10  -1  -1   10.91    0.85
  10  -1   1   11.45    0.78
 -10  -1  -1   11.07    0.87
 -10  -1  -1   12.68    0.79
 -10  -1  -1   12.68    0.88
  10  -1   1   13.61    0.92
  10  -1   1   11.70    0.82
  10   1   1   12.83    0.91
 -10   1  -1   12.83    0.82
 -10   1  -1   11.84    0.88
  10   1   1   12.77    0.92
 -10   1  -1   14.04    0.86
  10   1   1   11.98    0.79
 -10   1  -1   13.57    0.82
  10   1   1   13.59    0.87
 -10   1  -1   10.87    0.88
 -10   1  -1   12.78    0.88
 -10   1  -1   11.87    0.88
 -10   1  -1   12.40    0.88
  10   1   1   12.57    0.80
  10   1   1   12.79    0.93
  10   1   1   13.01    0.87
 -10   1  -1   13.07    0.89
 -10   1  -1   13.10    0.86
  10   1   1   11.99    0.86
  10   1   1   12.42    0.77
 -10   1  -1   12.37    0.78
 -11  -1  -1    5.76    0.66
  11  -1   1    6.57    0.71
 -11  -1  -1    6.23    0.58
  11  -1   1    6.31    0.48
 -11  -1  -1    6.16    0.68
 -11  -1  -1    6.99    0.54
  11  -1   1    6.18    0.70
 -11  -1  -1    5.95    0.58
  11  -1   1    5.34    0.57
 -11  -1  -1    6.44    0.67
  11  -1   1    5.71    0.58
  11  -1   1    5.66    0.67
  11  -1   1    5.70    0.58
 -11  -1  -1    7.15    0.58
 -11  -1  -1    5.88    0.71
 -11  -1  -1    6.21    0.66
 -11  -1  -1    6.03    0.69
 -11  -1  -1    7.29    0.55
 -11   1  -1    6.76    0.57
 -11   1  -1    4.93    0.66
  11   1   1    5.85    0.62
  11   1   1    6.27    0.55
 -11   1  -1    6.31    0.67
 -11   1  -1    4.99    0.64
  11   1   1    6.36    0.72
  11   1   1    5.53    0.72
  11   1   1    5.81    0.47
  11   1   1    6.60    0.70
 -11   1  -1    5.97    0.66
  11   1   1    4.04    0.60
 -11   1  -1    6.51    0.68
 -11   1  -1    6.15    0.49
 -11   1  -1    6.23    0.67
  11   1   1    5.86    0.56
 -11   1  -1    5.92    0.59
  11   1   1    6.10    0.69
 -11   1  -1    6.24    0.58
 -11   1  -1    5.91    0.56
  12  -1   1    5.48    0.81
 -12  -1  -1    7.05    0.75
  12  -1   1    8.41    0.72
  12  -1   1    4.72    0.82
  12  -1   1    7.49    0.59
 -12  -1  -1    7.82    0.71
  12  -1   1    7.64    0.66
  12  -1   1    8.81    0.84
 -12  -1  -1    7.85    0.79
  12  -1   1    8.25    0.65
  12  -1   1    8.40    0.86
  12  -1   1    7.73    0.88
 -12  -1  -1    7.44    0.70
 -12  -1  -1    8.86    1.00
 -12  -1  -1    7.13    0.85
 -12  -1  -1    8.97    0.66
 -12  -1  -1    7.07    0.71
 -12  -1  -1    6.08    0.76
 -12  -1  -1    8.75    0.59
 -12  -1  -1    8.30    0.80
  12   1   1    8.82    0.66
 -12   1  -1    7.67    0.81
  12   1   1    7.64    0.87
 -12   1  -1    8.16    0.68
 -12   1  -1    7.66    0.83
 -12   1  -1    7.53    0.89
 -12   1  -1    6.67    0.79
  12   1   1    7.16    0.57
  12   1   1    7.77    0.64
 -12   1  -1    6.58    0.80
 -12   1  -1    8.13    0.85
 -12   1  -1    7.65    0.88
  12   1   1    7.77    0.85
 -12   1  -1    8.19    0.59
  12   1   1    8.15    0.88
 -12   1  -1    7.49    0.79
 -13  -1  -1    0.67    0.63
 -13  -1  -1    0.29    0.55
 -13  -1  -1    0.83    0.42
 -13  -1  -1    1.12    0.53
  13  -1   1   -0.04    0.48
 -13  -1  -1    0.87    0.47
  13  -1   1    0.60    0.57
  13  -1   1    0.89    0.64
  13  -1   1    0.52    0.75
 -13  -1  -1    0.81    0.59
 -13  -1  -1   -0.34    0.50
 -13  -1  -1    0.96    0.64
 -13  -1  -1    1.09    0.54
  13  -1   1    0.67    0.61
 -13  -1  -1    1.01    0.62
  13  -1   1    0.15    0.73
  13  -1   1    0.44    0.50
  13  -1   1    1.34    0.49
 -13  -1  -1    0.57    0.37
  13  -1   1    0.99    0.34
 -13   1  -1    0.53    0.53
 -13   1  -1    0.24    0.71
  13   1   1    0.15    0.60
  13   1   1    0.08    0.42
 -13   1  -1    0.68    0.33
 -13   1  -1    0.34    0.52
 -13   1  -1    1.28    0.47
 -13   1  -1    0.80    0.56
  13   1   1   -0.22    0.63
  13   1   1    0.78    0.59
 -13   1  -1    0.75    0.69
  13   1   1    0.36    0.41
  13   1   1    0.98    0.65
  13   1   1    0.82    0.65
 -13   1  -1    0.73    0.48
 -13   1  -1    0.06    0.53
 -13   1  -1    1.33    0.63
 -13   1  -1    1.14    0.53
 -14  -1  -1    1.08    0.50
  14  -1   1    1.02    0.57
  14  -1   1    0.33    0.57
 -14  -1  -1    0.27    0.72
  14  -1   1    1.68    0.74
 -14  -1  -1    0.77    0.63
 -14  -1  -1    0.47    0.62
 -14  -1  -1    0.48    0.65
 -14  -1  -1    0.52    0.64
  14  -1   1    0.61    0.59
  14  -1   1    0.51    0.98
 -14  -1  -1    0.80    0.68
  14  -1   1    0.47    0.87
 -14  -1  -1    0.55    0.55
  14  -1   1    0.51    0.89
  14  -1   1    1.08    0.39
 -14  -1  -1    0.24    0.74
 -14  -1  -1    1.51    0.72
  14  -1   1    2.18    0.83
 -14   1  -1    1.71    0.84
 -14   1  -1    0.64    0.66
  14   1   1    1.38    0.76
 -14   1  -1   -0.47    0.68
 -14   1  -1    0.95    0.85
  14   1   1    0.86    0.50
 -14   1  -1    0.62    0.67
 -14   1  -1    0.54    0.73
  14   1   1    1.08    0.72
  14   1   1    1.03    0.49
 -14   1  -1    1.39    0.38
 -14   1  -1    0.61    0.72
 -14   1  -1    0.68    0.54
 -14   1  -1    0.52    0.65
  14   1   1    0.71    0.74
  14   1   1    1.11    0.78
 -14   1  -1    1.07    0.53
  15  -1   1    0.69    0.66
 -15  -1  -1   -0.26    0.77
  15  -1   1   -0.53    0.67
 -15  -1  -1    0.20    0.90
 -15  -1  -1    0.02    0.82
 -15  -1  -1   -0.90    0.64
  15  -1   1   -0.11    0.43
 -15  -1  -1   -0.84    0.75
  15  -1   1    0.79    0.70
  15  -1   1   -0.06    1.01
  15  -1   1   -0.16    1.04
  15  -1   1    0.15    0.83
 -15  -1  -1   -0.04    0.77
 -15  -1  -1   -0.15    0.79
  15  -1   1    0.41    0.89
 -15  -1  -1   -0.13    0.57
  15  -1   1    0.69    0.95
 -15  -1  -1    1.19    0.89
 -15  -1  -1   -0.47    0.82
 -15   1  -1   -1.25    0.83
  15   1   1   -0.36    0.84
 -15   1  -1    0.09    0.42
 -15   1  -1    0.16    0.76
 -15   1  -1    0.39    0.99
  15   1   1    0.56    0.83
 -15   1  -1    0.07    0.81
 -15   1  -1   -0.51    0.76
 -15   1  -1   -0.03    0.75
 -15   1  -1   -0.45    0.76
  15   1   1   -0.07    0.88
  15   1   1    0.27    0.59
 -15   1  -1   -0.02    0.64
 -15   1  -1    0.16    0.98
  15   1   1    0.99    0.87
 -15   1  -1   -0.16    0.64
  15   1   1    0.04    0.56
  15   1   1    0.31    0.87
 -15  -2   1    0.67    0.66
  15  -2  -1    0.38    0.74
 -15  -2   1    1.19    0.81
 -15  -2   1    0.37    0.68
  15  -2  -1    0.95    1.51
 -15  -2   1   -0.80    0.75
 -15  -2   1    0.25    0.75
  15  -2  -1    0.05    0.86
  15  -2  -1   -0.05    0.67
 -15  -2   1   -0.01    0.74
 -15  -2   1   -0.44    0.72
  15  -2  -1   -0.41    0.53
 -15  -2   1    0.05    0.88
 -15  -2   1    0.62    0.90
  15  -2  -1   -0.07    0.69
  15   2  -1    0.05    0.50
 -15   2   1    0.65    0.76
 -15   2   1   -0.15    0.64
 -15   2   1   -0.22    0.89
  15   2  -1   -0.08    0.84
  15   2  -1   -0.21    0.74
 -15   2   1   -0.06    0.76
 -15   2   1    0.96    0.98
 -15   2   1    0.22    0.74
 -15   2   1    0.80    1.00
  15   2  -1   -0.65    0.95
  15   2  -1    0.19    0.53
 -15   2   1   -0.12    0.70
  15   2  -1    0.22    0.77
 -15   2   1   -0.58    0.86
 -15   2   1    0.01    0.75
 -14  -2   1    0.00    0.55
 -14  -2   1    0.31    0.76
  14  -2  -1   -0.25    0.61
  14  -2  -1    0.52    0.60
 -14  -2   1    0.49    0.66
 -14  -2   1    0.40    0.64
 -14  -2   1   -0.30    0.59
  14  -2  -1   -0.21    0.57
  14  -2  -1   -0.16    0.74
  14  -2  -1   -0.26    0.46
 -14  -2   1   -0.77    0.59
 -14  -2   1    0.34    0.61
  14  -2  -1   -0.27    0.93
  14  -2  -1    0.37    0.66
 -14  -2   1   -0.55    0.60
 -14  -2   1   -0.38    0.77
  14  -2  -1    0.11    0.94
  14  -2  -1   -0.16    0.67
  14   2  -1   -0.10    0.43
 -14   2   1   -0.48    0.65
  14   2  -1   -0.06    0.42
 -14   2   1   -0.21    0.89
  14   2  -1    0.05    0.65
 -14   2   1    0.33    0.67
 -14   2   1    0.10    0.62
 -14   2   1   -0.41    0.61
 -14   2   1   -0.19    0.65
 -14   2   1    0.36    0.63
  14   2  -1   -0.18    0.41
  14   2  -1    0.15    0.70
  14   2  -1   -0.88    0.62
  14   2  -1   -0.41    0.73
 -14   2   1   -0.43    0.63
 -14   2   1    0.55    0.89
 -14   2   1   -0.29    0.52
 -13  -2   1    0.14    0.52
 -13  -2   1    0.01    0.55
  13  -2  -1    0.13    0.58
  13  -2  -1    0.09    0.82
  13  -2  -1    0.43    0.57
 -13  -2   1   -0.08    0.50
  13  -2  -1   -0.11    0.81
 -13  -2   1    0.60    0.66
  13  -2  -1    0.22    0.61
  13  -2  -1    0.86    0.39
  13  -2  -1    0.12    0.51
 -13  -2   1    0.23    0.51
 -13  -2   1    0.11    0.48
 -13  -2   1   -0.29    0.55
  13  -2  -1    0.10    0.43
 -13  -2   1    1.12    0.63
 -13  -2   1    1.22    0.64
  13  -2  -1   -0.07    0.51
  13   2  -1   -0.40    0.54
 -13   2   1    0.63    0.58
  13   2  -1    0.00    0.37
 -13   2   1    0.37    0.37
  13   2  -1    0.69    0.57
 -13   2   1    0.36    0.57
  13   2  -1   -0.22    0.36
 -13   2   1    0.27    0.76
 -13   2   1    0.97    0.57
 -13   2   1    0.19    0.77
 -13   2   1    0.33    0.55
  13   2  -1   -0.20    0.35
  13   2  -1    0.11    0.58
 -13   2   1    0.38    0.52
 -13   2   1    0.13    0.51
 -13   2   1    0.25    0.52
  13   2  -1    0.55    0.63
 -12  -2   1    0.41    0.44
 -12  -2   1    0.17    0.41
 -12  -2   1    0.57    0.48
  12  -2  -1    0.52    0.47
  12  -2  -1    0.45    0.45
 -12  -2   1    0.18    0.49
 -12  -2   1    0.79    0.56
  12  -2  -1    0.48    0.34
  12  -2  -1    1.05    0.63
  12  -2  -1   -0.14    0.62
 -12  -2   1    0.80    0.53
 -12  -2   1    0.02    0.45
  12  -2  -1    1.06    0.50
  12  -2  -1    0.79    0.40
 -12  -2   1    0.20    0.44
 -12  -2   1    0.02    0.42
  12   2  -1    0.47    0.64
  12   2  -1    0.38    0.48
 -12   2   1    0.20    0.27
  12   2  -1    0.38    0.33
 -12   2   1    0.69    0.48
 -12   2   1    0.31    0.43
 -12   2   1    0.49    0.66
 -12   2   1    0.76    0.45
  12   2  -1   -0.14    0.30
 -12   2   1    0.68    0.47
 -12   2   1   -0.04    0.66
 -12   2   1    0.29    0.47
 -12   2   1   -0.08    0.48
  12   2  -1   -0.37    0.46
 -12   2   1    0.64    0.44
  12   2  -1    0.34    0.32
  12   2  -1    0.49    0.48
  11  -2  -1    1.41    0.40
  11  -2  -1    1.67    0.47
  11  -2  -1    1.27    0.61
 -11  -2   1    0.80    0.36
 -11  -2   1    0.63    0.44
  11  -2  -1    0.93    0.29
 -11  -2   1    0.34    0.36
  11  -2  -1    0.00    0.48
  11  -2  -1    1.18    0.60
 -11  -2   1    0.86    0.36
  11  -2  -1    0.55    0.35
 -11  -2   1    1.28    0.41
 -11  -2   1    0.14    0.37
 -11  -2   1    0.85    0.46
  11  -2  -1    1.32    0.41
 -11  -2   1    1.19    0.46
  11  -2  -1    1.38    0.41
 -11  -2   1    0.16    0.36
  11   2  -1    0.96    0.45
 -11   2   1    0.78    0.38
 -11   2   1    0.30    0.41
 -11   2   1    1.11    0.30
 -11   2   1    1.03    0.53
  11   2  -1    1.07    0.46
 -11   2   1    0.93    0.40
 -11   2   1    0.35    0.62
 -11   2   1    0.51    0.37
  11   2  -1    0.79    0.27
 -11   2   1    0.98    0.52
 -11   2   1    1.04    0.43
  11   2  -1    0.73    0.41
 -11   2   1    0.61    0.43
  11   2  -1    0.34    0.28
  11   2  -1    0.80    0.27
  11   2  -1    0.77    0.40
  10  -2  -1    1.03    0.37
  10  -2  -1    2.19    0.36
  10  -2  -1    2.22    0.35
  10  -2  -1    2.13    0.52
 -10  -2   1    1.79    0.23
 -10  -2   1    1.88    0.41
  10  -2  -1    1.87    0.33
  10  -2  -1    2.51    0.29
 -10  -2   1    1.92    0.35
 -10  -2   1    3.17    0.34
  10  -2  -1    1.10    0.49
 -10  -2   1    2.57    0.40
  10  -2  -1    1.53    0.36
 -10  -2   1    2.16    0.36
 -10  -2   1    2.15    0.33
 -10  -2   1    2.24    0.36
 -10  -2   1    2.31    0.42
 -10  -2   1    1.92    0.42
  10  -2  -1    1.92    0.38
  10   2  -1    1.68    0.26
 -10   2   1    2.07    0.38
 -10   2   1    1.85    0.38
 -10   2   1    3.03    0.52
 -10   2   1    2.31    0.38
 -10   2   1    2.40    0.39
  10   2  -1    1.45    0.40
 -10   2   1    1.78    0.48
 -10   2   1    2.33    0.49
  10   2  -1    1.85    0.29
  10   2  -1    2.55    0.28
  10   2  -1    1.61    0.39
 -10   2   1    2.07    0.40
 -10   2   1    2.65    0.37
   9  -2  -1    1.83    0.35
   9  -2  -1    1.85    0.33
  -9  -2   1    2.19    0.35
  -9  -2   1    2.11    0.28
  -9  -2   1    1.99    0.23
   9  -2  -1    2.19    0.32
  -9  -2   1    2.28    0.29
  -9  -2   1    2.05    0.34
  -9  -2   1    2.39    0.31
   9  -2  -1    1.98    0.45
  -9  -2   1    1.95    0.37
   9  -2  -1    1.64    0.36
  -9  -2   1    2.48    0.38
   9  -2  -1    2.14    0.35
  -9  -2   1    2.67    0.37
  -9  -2   1    2.37    0.32
   9  -2  -1    1.70    0.45
  -9   2   1    2.29    0.36
  -9   2   1    2.55    0.34
  -9   2   1    1.92    0.37
   9   2  -1    2.45    0.28
   9   2  -1    2.41    0.33
  -9   2   1    2.14    0.35
  -9   2   1    2.17    0.37
  -9   2   1    1.78    0.42
   9   2  -1    2.19    0.32
   9   2  -1    1.67    0.33
  -9   2   1    2.06    0.27
  -9   2   1    2.78    0.45
  -9   2   1    2.36    0.33
   9   2  -1    2.98    0.37
   9   2  -1    2.24    0.27
   9   2  -1    2.51    0.37
  -9   2   1    1.99    0.33
   8  -2  -1   33.98    1.92
  -8  -2   1   33.39    1.92
  -8  -2   1   31.78    1.94
  -8  -2   1   33.13    1.92
  -8  -2   1   34.77    1.92
   8  -2  -1   33.53    1.91
   8  -2  -1   33.68    1.92
  -8  -2   1   34.55    1.92
   8  -2  -1   32.75    1.89
  -8  -2   1   32.45    1.94
   8  -2  -1   32.85    1.93
   8  -2  -1   31.75    1.95
  -8  -2   1   30.97    1.88
  -8  -2   1   34.90    1.94
  -8  -2   1   33.08    1.90
   8  -2  -1   32.90    1.97
  -8  -2   1   32.65    1.90
   8  -2  -1   31.95    1.97
  -8   2   1   32.67    1.92
  -8   2   1   33.63    1.89
  -8   2   1   33.20    1.92
   8   2  -1   32.43    1.89
  -8   2   1   31.97    1.94
   8   2  -1   31.22    1.91
  -8   2   1   31.98    1.93
   8   2  -1   34.23    1.91
  -8   2   1   33.72    1.94
   8   2  -1   33.18    1.94
  -8   2   1   33.40    1.95
   8   2  -1   31.20    1.91
  -8   2   1   34.67    1.92
   8   2  -1   33.75    1.95
  -8   2   1   35.43    1.94
  -8   2   1   34.87    1.94
   8   2  -1   33.65    1.89
   7  -2  -1   15.61    0.93
   7  -2  -1   15.88    0.96
  -7  -2   1   14.44    0.93
   7  -2  -1   15.60    0.96
  -7  -2   1   15.22    0.95
  -7  -2   1   14.49    0.90
  -7  -2   1   16.48    0.96
  -7  -2   1   15.84    0.93
  -7  -2   1   16.14    0.93
   7  -2  -1   14.40    0.92
   7  -2  -1   16.20    0.93
  -7  -2   1   15.54    0.91
  -7  -2   1   15.03    0.93
   7  -2  -1   16.55    0.97
  -7  -2   1   16.14    0.95
   7  -2  -1   16.50    0.98
   7  -2  -1   15.42    0.90
  -7  -2   1   14.95    0.90
   7  -2  -1   14.59    0.94
   7   2  -1   14.98    0.89
  -7   2   1   14.60    0.93
   7   2  -1   15.86    0.90
  -7   2   1   15.30    0.90
  -7   2   1   15.22    0.93
   7   2  -1   15.56    0.92
   7   2  -1   14.66    0.92
  -7   2   1   15.35    0.93
  -7   2   1   14.53    0.96
   7   2  -1   14.64    0.91
  -7   2   1   14.65    0.96
   7   2  -1   14.97    0.95
  -7   2   1   15.70    0.95
  -7   2   1   14.48    0.94
  -7   2   1   17.48    0.95
  -7   2   1   15.79    0.94
   7   2  -1   15.59    0.95
  -6  -2   1    0.02    0.18
   6  -2  -1    0.07    0.15
   6  -2  -1    0.09    0.16
   6  -2  -1    0.14    0.16
  -6  -2   1    0.14    0.16
  -6  -2   1    0.29    0.13
   6  -2  -1    0.29    0.12
  -6  -2   1    0.03    0.18
   6  -2  -1    0.46    0.26
   6  -2  -1    0.00    0.17
  -6  -2   1    0.06    0.15
  -6  -2   1    0.47    0.14
  -6  -2   1    0.04    0.14
   6  -2  -1    0.33    0.26
  -6  -2   1    0.31    0.14
  -6  -2   1    0.26    0.17
   6  -2  -1    0.25    0.17
  -6  -2   1    0.35    0.18
  -6   2   1    0.18    0.16
  -6   2   1    0.28    0.17
  -6   2   1    0.54    0.20
  -6   2   1    0.30    0.12
  -6   2   1   -0.15    0.24
   6   2  -1    0.29    0.11
  -6   2   1    0.38    0.24
   6   2  -1    0.28    0.16
  -6   2   1    0.34    0.16
  -6   2   1    0.10    0.20
   6   2  -1    0.36    0.16
  -6   2   1   -0.14    0.20
   6   2  -1    0.35    0.18
  -6   2   1    0.15    0.16
   6   2  -1    0.55    0.18
   6   2  -1    0.33    0.18
   6   2  -1    0.28    0.11
   5  -2  -1   42.29    2.35
   5  -2  -1   40.34    2.37
   5  -2  -1   41.10    2.34
   5  -2  -1   41.53    2.35
  -5  -2   1   41.59    2.34
  -5  -2   1   40.93    2.36
  -5  -2   1   42.49    2.37
  -5  -2   1   42.03    2.34
   5  -2  -1   40.20    2.36
   5  -2  -1   43.26    2.37
  -5  -2   1   40.06    2.34
  -5  -2   1   39.49    2.37
  -5  -2   1   44.09    2.36
   5  -2  -1   41.78    2.37
   5  -2  -1   43.29    2.36
  -5  -2   1   39.02    2.34
  -5  -2   1   40.39    2.35
  -5  -2   1   37.65    2.37
   5   2  -1   38.33    2.34
  -5   2   1   40.85    2.36
  -5   2   1   41.92    2.34
   5   2  -1   42.43    2.35
  -5   2   1   42.91    2.35
   5   2  -1   41.83    2.33
   5   2  -1   41.74    2.37
   5   2  -1   39.70    2.34
   5   2  -1   42.55    2.34
   5   2  -1   41.74    2.36
  -5   2   1   40.89    2.37
  -5   2   1   42.44    2.36
  -5   2   1   39.16    2.36
  -5   2   1   44.55    2.37
  -5   2   1   40.66    2.35
  -5   2   1   41.58    2.36
  -5   2   1   45.64    2.37
  -4  -2   1   -0.11    0.11
  -4  -2   1    0.12    0.11
  -4  -2   1    0.13    0.13
   4  -2  -1    0.23    0.13
   4  -2  -1   -0.22    0.20
   4  -2  -1    0.20    0.12
   4  -2  -1    0.28    0.09
   4  -2  -1    0.23    0.10
   4  -2  -1    0.10    0.20
   4  -2  -1    0.02    0.15
   4  -2  -1    0.17    0.13
  -4  -2   1    0.08    0.08
  -4  -2   1    0.07    0.11
  -4  -2   1    0.37    0.13
   4  -2  -1    0.35    0.14
  -4  -2   1   -0.03    0.11
  -4   2   1    0.39    0.18
   4   2  -1    0.15    0.07
  -4   2   1    0.12    0.13
   4   2  -1    0.14    0.08
   4   2  -1    0.11    0.12
  -4   2   1    0.09    0.13
  -4   2   1    0.08    0.10
   4   2  -1    0.05    0.12
   4   2  -1    0.09    0.10
  -4   2   1    0.51    0.16
   4   2  -1    0.06    0.08
  -4   2   1    0.19    0.16
  -4   2   1    0.39    0.18
  -4   2   1    0.41    0.13
  -4   2   1    0.28    0.10
  -4   2   1    0.33    0.14
   4   2  -1    0.22    0.07
   3  -2  -1    6.82    0.43
  -3  -2   1    6.59    0.42
   3  -2  -1    7.18    0.44
   3  -2  -1    7.46    0.42
   3  -2  -1    6.44    0.42
   3  -2  -1    6.93    0.42
  -3  -2   1    6.28    0.40
   3  -2  -1    6.66    0.42
   3  -2  -1    7.00    0.44
  -3  -2   1    6.67    0.42
  -3  -2   1    6.51    0.39
   3  -2  -1    6.56    0.41
   3  -2  -1    6.71    0.44
  -3  -2   1    6.83    0.40
  -3  -2   1    7.25    0.42
  -3  -2   1    6.20    0.39
  -3  -2   1    6.09    0.40
  -3  -2   1    7.21    0.42
  -3   2   1    7.02    0.42
  -3   2   1    6.67    0.41
   3   2  -1    6.73    0.39
   3   2  -1    6.70    0.39
  -3   2   1    6.82    0.42
  -3   2   1    6.31    0.44
  -3   2   1    6.80    0.42
  -3   2   1    7.48    0.45
  -3   2   1    7.17    0.45
  -3   2   1    7.33    0.42
   3   2  -1    7.32    0.42
   3   2  -1    6.14    0.39
   3   2  -1    6.74    0.39
   3   2  -1    6.83    0.42
  -3   2   1    6.58    0.40
  -3   2   1    6.82    0.42
  -2  -2   1   18.77    1.11
   2  -2  -1   20.20    1.13
   2  -2  -1   20.12    1.12
   2  -2  -1   19.79    1.12
  -2  -2   1   21.25    1.12
   2  -2  -1   21.88    1.14
   2  -2  -1   20.88    1.12
  -2  -2   1   18.51    1.11
  -2  -2   1   19.43    1.12
  -2  -2   1   20.05    1.12
   2  -2  -1   20.56    1.12
  -2  -2   1   19.69    1.11
  -2  -2   1   18.08    1.11
   2  -2  -1   20.35    1.13
  -2  -2   1   18.43    1.11
   2  -2  -1   19.67    1.12
   2   2  -1   18.68    1.11
  -2   2   1   19.21    1.12
  -2   2   1   19.27    1.12
  -2   2   1   19.36    1.12
  -2   2   1   19.78    1.14
   2   2  -1   18.71    1.10
  -2   2   1   19.46    1.13
   2   2  -1   19.47    1.12
  -2   2   1   19.10    1.12
  -2   2   1   19.67    1.13
  -2   2   1   20.57    1.12
  -2   2   1   19.22    1.11
   2   2  -1   19.05    1.11
   2   2  -1   19.26    1.10
   2   2  -1   19.75    1.10
  -1  -2   1   38.05    2.12
  -1  -2   1   39.33    2.11
   1  -2  -1   40.15    2.13
  -1  -2   1   39.23    2.11
   1  -2  -1   37.38    2.12
  -1  -2   1   36.79    2.11
   1  -2  -1   39.46    2.12
  -1  -2   1   35.97    2.11
  -1  -2   1   36.72    2.13
  -1  -2   1   37.09    2.11
   1  -2  -1   35.82    2.12
   1  -2  -1   35.25    2.12
   1  -2  -1   39.34    2.12
   1  -2  -1   36.64    2.12
   1  -2  -1   37.55    2.12
   1  -2  -1   34.13    2.11
  -1  -2   1   36.46    2.11
  -1  -2   1   37.80    2.11
   1  -2  -1   37.29    2.12
   1   2  -1   35.83    2.13
  -1   2   1   36.22    2.12
   1   2  -1   38.26    2.11
   1   2  -1   38.89    2.11
   1   2  -1   36.52    2.11
  -1   2   1   37.75    2.12
  -1   2   1   40.15    2.12
   1   2  -1   36.62    2.12
  -1   2   1   42.16    2.14
   1   2  -1   36.87    2.11
   1   2  -1   35.76    2.11
   1   2  -1   37.25    2.12
  -1   2   1   36.77    2.12
  -1   2   1   38.58    2.12
   0  -2  -1   97.33    4.98
   0  -2  -1   94.78    4.96
   0  -2   1   94.17    4.96
   0  -2   1   88.15    4.96
   0  -2  -1   93.28    4.96
   0  -2   1   86.73    4.96
   0  -2   1   85.66    4.96
   0  -2  -1   83.03    4.96
   0  -2  -1   91.04    4.95
   0  -2   1   93.95    4.96
   0  -2  -1   84.25    4.96
   0  -2   1   90.64    4.96
   0  -2  -1   83.77    4.96
   0  -2   1   87.94    4.97
   0  -2  -1   85.88    4.96
   0  -2   1   84.63    4.95
   0  -2   1   89.96    4.96
   0   2   1   89.23    4.96
   0   2  -1   84.58    4.96
   0   2   1   84.29    4.96
   0   2  -1   82.67    4.96
   0   2  -1   91.66    4.96
   0   2  -1   91.04    4.96
   0   2   1   95.70    4.98
   0   2   1   85.82    4.96
   0   2   1   82.60    4.96
   0   2  -1   83.75    4.95
   0   2  -1   92.54    4.96
   0   2   1   84.98    4.96
   0   2  -1   92.14    4.96
   0   2  -1   83.90    4.97
   0   2   1   83.19    4.96
   0   2   1   92.93    4.96
   0   2  -1   87.77    4.96
   1  -2   1    0.29    0.08
   1  -2   1    0.51    0.09
  -1  -2  -1    0.18    0.09
   1  -2   1    0.32    0.08
   1  -2   1    0.68    0.09
  -1  -2  -1    0.47    0.06
   1  -2   1    0.40    0.09
   1  -2   1    0.71    0.10
  -1  -2  -1    0.31    0.07
   1  -2   1    0.51    0.05
   1  -2   1    0.55    0.11
  -1  -2  -1    0.45    0.06
  -1  -2  -1    0.50    0.14
   1  -2   1    0.50    0.13
   1  -2   1    0.64    0.11
  -1   2  -1    0.39    0.08
  -1   2  -1    0.37    0.08
  -1   2  -1    0.50    0.06
  -1   2  -1    0.54    0.10
  -1   2  -1    0.70    0.11
  -1   2  -1    0.45    0.09
  -1   2  -1    0.66    0.09
  -1   2  -1    0.45    0.08
  -1   2  -1    0.57    0.10
   2  -2   1   47.50    2.79
   2  -2   1   49.64    2.80
   2  -2   1   48.49    2.79
   2  -2   1   50.51    2.78
   2  -2   1   47.88    2.79
   2  -2   1   51.97    2.80
   2  -2   1   48.09    2.80
   2  -2   1   50.23    2.80
   2  -2   1   48.39    2.79
  -2   2  -1   48.31    2.79
  -2   2  -1   51.02    2.79
  -2   2  -1   49.83    2.80
  -2   2  -1   47.74    2.79
  -2   2  -1   50.78    2.80
  -2   2  -1   50.25    2.79
  -2   2  -1   49.18    2.78
  -2   2  -1   49.90    2.80
  -2   2  -1   49.45    2.80
  -3  -2  -1    1.01    0.13
   3  -2   1    0.79    0.14
   3  -2   1    1.36    0.15
  -3  -2  -1    1.09    0.09
   3  -2   1    1.08    0.15
   3  -2   1    1.28    0.19
  -3  -2  -1    0.88    0.16
  -3  -2  -1    1.07    0.17
   3  -2   1    1.23    0.18
  -3  -2  -1    0.89    0.11
  -3  -2  -1    1.13    0.09
  -3  -2  -1    0.88    0.13
   3  -2   1    1.66    0.16
   3  -2   1    1.13    0.14
  -3  -2  -1    0.53    0.16
  -3  -2  -1    0.90    0.11
   3  -2   1    1.77    0.24
  -3   2  -1    1.30    0.15
  -3   2  -1    0.91    0.14
  -3   2  -1    1.09    0.17
  -3   2  -1    1.81    0.23
  -3   2  -1    1.04    0.15
  -3   2  -1    1.15    0.18
  -3   2  -1    1.27    0.14
  -3   2  -1    1.20    0.11
  -3   2  -1    1.10    0.14
  -3   2  -1    1.04    0.17
  -4  -2  -1    3.28    0.31
   4  -2   1    4.16    0.30
  -4  -2  -1    3.74    0.36
   4  -2   1    4.42    0.32
   4  -2   1    3.76    0.28
   4  -2   1    3.94    0.28
  -4  -2  -1    3.24    0.30
   4  -2   1    4.11    0.32
   4  -2   1    4.49    0.29
  -4  -2  -1    4.09    0.24
  -4  -2  -1    3.71    0.26
  -4  -2  -1    4.20    0.31
   4  -2   1    4.27    0.28
  -4  -2  -1    3.99    0.24
   4  -2   1    3.57    0.29
  -4  -2  -1    4.23    0.26
  -4  -2  -1    4.03    0.26
   4  -2   1    3.06    0.30
   4   2   1    3.43    0.24
  -4   2  -1    4.26    0.30
  -4   2  -1    4.23    0.32
  -4   2  -1    4.25    0.31
   4   2   1    3.15    0.24
  -4   2  -1    3.80    0.31
  -4   2  -1    3.75    0.27
   4   2   1    3.57    0.23
  -4   2  -1    4.06    0.29
  -4   2  -1    4.06    0.30
  -4   2  -1    4.24    0.30
   4   2   1    3.59    0.23
  -4   2  -1    3.62    0.25
   4   2   1    4.00    0.33
  -5  -2  -1    0.37    0.17
  -5  -2  -1    0.65    0.12
   5  -2   1    0.43    0.16
  -5  -2  -1    0.43    0.14
  -5  -2  -1    0.45    0.14
   5  -2   1    0.35    0.21
   5  -2   1    0.56    0.16
  -5  -2  -1    0.63    0.17
  -5  -2  -1    0.42    0.18
   5  -2   1    0.66    0.14
   5  -2   1    0.63    0.16
   5  -2   1    0.77    0.17
   5  -2   1    0.82    0.25
  -5  -2  -1    0.75    0.11
   5  -2   1    0.89    0.26
  -5  -2  -1    0.64    0.11
  -5  -2  -1    0.65    0.17
   5  -2   1    0.65    0.18
   5   2   1    0.46    0.20
   5   2   1    0.50    0.16
  -5   2  -1    0.50    0.22
  -5   2  -1    0.53    0.15
  -5   2  -1    0.53    0.22
   5   2   1    0.66    0.09
  -5   2  -1    0.73    0.18
  -5   2  -1    0.69    0.13
  -5   2  -1    0.47    0.20
  -5   2  -1    0.57    0.17
  -5   2  -1    0.92    0.19
  -5   2  -1    0.89    0.17
   5   2   1    0.64    0.13
   5   2   1    0.60    0.09
   5   2   1    0.69    0.12
  -5   2  -1    0.50    0.16
   5   2   1    0.36    0.19
   6  -2   1   15.23    0.92
  -6  -2  -1   13.63    0.93
  -6  -2  -1   15.35    0.91
  -6  -2  -1   15.10    0.92
  -6  -2  -1   15.62    0.95
  -6  -2  -1   15.85    0.90
   6  -2   1   15.88    0.93
  -6  -2  -1   15.24    0.95
   6  -2   1   16.25    0.95
  -6  -2  -1   15.44    0.91
   6  -2   1   15.44    0.97
  -6  -2  -1   15.96    0.92
   6  -2   1   16.20    0.95
   6  -2   1   15.47    0.93
   6  -2   1   16.11    0.96
   6  -2   1   15.77    0.96
   6  -2   1   15.32    0.92
  -6  -2  -1   15.47    0.95
  -6   2  -1   15.88    0.94
   6   2   1   16.16    0.97
   6   2   1   15.42    1.02
  -6   2  -1   16.80    0.96
  -6   2  -1   16.39    0.94
  -6   2  -1   16.00    0.93
   6   2   1   15.34    0.90
  -6   2  -1   15.66    0.92
   6   2   1   15.06    0.90
  -6   2  -1   16.47    0.95
  -6   2  -1   15.05    0.95
  -6   2  -1   16.26    0.94
   6   2   1   14.97    0.91
   6   2   1   15.34    0.91
   6   2   1   14.71    0.95
  -7  -2  -1    7.14    0.53
  -7  -2  -1    7.50    0.46
  -7  -2  -1    7.04    0.53
  -7  -2  -1    6.87    0.50
   7  -2   1    7.70    0.56
  -7  -2  -1    7.24    0.53
   7  -2   1    7.50    0.48
   7  -2   1    8.19    0.56
   7  -2   1    6.37    0.53
   7  -2   1    7.26    0.53
   7  -2   1    7.74    0.49
   7  -2   1    7.77    0.49
  -7  -2  -1    5.79    0.46
  -7  -2  -1    7.08    0.50
  -7  -2  -1    6.51    0.48
   7  -2   1    7.38    0.54
   7  -2   1    7.10    0.49
  -7  -2  -1    7.27    0.46
   7   2   1    7.33    0.56
  -7   2  -1    7.57    0.50
  -7   2  -1    7.03    0.50
  -7   2  -1    6.98    0.50
  -7   2  -1    6.96    0.47
  -7   2  -1    7.15    0.53
   7   2   1    6.96    0.56
  -7   2  -1    6.70    0.54
   7   2   1    8.86    0.60
  -7   2  -1    7.16    0.47
  -7   2  -1    7.59    0.52
   7   2   1    6.31    0.44
   7   2   1    6.36    0.47
  -7   2  -1    7.64    0.53
   7   2   1    6.30    0.47
  -7   2  -1    6.61    0.54
   7   2   1    6.55    0.45
   8  -2   1    2.16    0.32
  -8  -2  -1    2.88    0.34
   8  -2   1    4.30    0.52
   8  -2   1    3.16    0.37
  -8  -2  -1    2.61    0.38
   8  -2   1    2.48    0.43
   8  -2   1    2.40    0.36
   8  -2   1    3.22    0.44
   8  -2   1    2.81    0.33
  -8  -2  -1    2.21    0.29
  -8  -2  -1    2.72    0.28
  -8  -2  -1    2.66    0.39
  -8  -2  -1    2.54    0.30
  -8  -2  -1    2.56    0.30
   8  -2   1    2.31    0.32
  -8  -2  -1    2.66    0.33
   8  -2   1    2.39    0.30
  -8  -2  -1    2.81    0.33
   8   2   1    2.34    0.35
  -8   2  -1    2.95    0.30
   8   2   1    2.20    0.44
   8   2   1    2.27    0.26
  -8   2  -1    3.17    0.37
  -8   2  -1    2.83    0.35
   8   2   1    2.47    0.25
  -8   2  -1    2.25    0.27
  -8   2  -1    2.61    0.34
  -8   2  -1    4.27    0.51
   8   2   1    2.63    0.36
  -8   2  -1    3.92    0.40
   8   2   1    2.99    0.37
  -8   2  -1    2.75    0.39
   8   2   1    2.81    0.43
  -8   2  -1    2.85    0.34
  -8   2  -1    3.18    0.36
   9  -2   1    1.42    0.35
   9  -2   1    0.75    0.47
   9  -2   1    0.96    0.32
   9  -2   1    0.45    0.31
   9  -2   1    0.31    0.29
  -9  -2  -1    0.45    0.23
  -9  -2  -1    0.67    0.25
   9  -2   1    0.01    0.41
  -9  -2  -1    0.38    0.37
  -9  -2  -1    0.15    0.30
  -9  -2  -1    0.02    0.23
  -9  -2  -1    0.38    0.25
   9  -2   1    0.92    0.32
  -9  -2  -1    0.75    0.29
   9  -2   1    0.53    0.26
   9  -2   1    0.64    0.23
  -9  -2  -1    0.66    0.32
  -9  -2  -1    0.80    0.32
  -9  -2  -1    0.09    0.27
  -9   2  -1    0.54    0.42
  -9   2  -1    0.88    0.31
   9   2   1    0.44    0.45
   9   2   1    0.41    0.35
  -9   2  -1    0.39    0.30
  -9   2  -1    0.22    0.30
  -9   2  -1    0.70    0.28
   9   2   1    0.68    0.20
  -9   2  -1    0.45    0.30
   9   2   1    0.33    0.20
  -9   2  -1    0.20    0.43
  -9   2  -1    0.22    0.26
   9   2   1    0.64    0.34
   9   2   1    0.18    0.45
  -9   2  -1    0.71    0.32
  -9   2  -1    1.20    0.22
   9   2   1    0.27    0.34
  10  -2   1    0.79    0.40
 -10  -2  -1    2.14    0.46
  10  -2   1    1.56    0.50
 -10  -2  -1    1.92    0.32
  10  -2   1    1.48    0.39
  10  -2   1    1.51    0.29
 -10  -2  -1    1.36    0.37
 -10  -2  -1    0.55    0.34
  10  -2   1    1.41    0.33
 -10  -2  -1    1.58    0.32
 -10  -2  -1    2.01    0.33
 -10  -2  -1    1.65    0.38
  10  -2   1    1.72    0.49
  10  -2   1    1.95    0.37
  10  -2   1    1.03    0.37
  10  -2   1    2.06    0.44
 -10  -2  -1    1.37    0.41
 -10  -2  -1    1.46    0.30
 -10  -2  -1    1.70    0.41
  10   2   1    1.31    0.38
 -10   2  -1    1.09    0.40
 -10   2  -1    2.21    0.48
 -10   2  -1    1.43    0.46
  10   2   1    1.12    0.25
  10   2   1    1.63    0.41
 -10   2  -1    1.82    0.38
 -10   2  -1    1.71    0.41
  10   2   1    1.32    0.43
 -10   2  -1    1.53    0.30
 -10   2  -1    1.33    0.38
 -10   2  -1    1.28    0.35
 -10   2  -1    2.02    0.27
  10   2   1    1.00    0.41
 -10   2  -1    1.42    0.38
  10   2   1    1.34    0.37
  10   2   1    1.74    0.25
 -10   2  -1    1.69    0.38
 -11  -2  -1    3.64    0.52
 -11  -2  -1    3.66    0.50
  11  -2   1    3.68    0.62
 -11  -2  -1    4.27    0.41
 -11  -2  -1    3.00    0.40
 -11  -2  -1    4.89    0.54
 -11  -2  -1    2.46    0.43
 -11  -2  -1    4.18    0.49
  11  -2   1    4.05    0.43
  11  -2   1    2.33    0.45
 -11  -2  -1    2.49    0.45
  11  -2   1    2.74    0.57
  11  -2   1    2.49    0.45
 -11  -2  -1    3.46    0.52
  11  -2   1    3.58    0.43
  11  -2   1    2.78    0.62
 -11  -2  -1    2.94    0.55
  11  -2   1    3.01    0.47
 -11   2  -1    3.48    0.41
 -11   2  -1    2.88    0.58
 -11   2  -1    4.13    0.52
  11   2   1    2.79    0.51
 -11   2  -1    3.41    0.46
 -11   2  -1    4.71    0.59
  11   2   1    2.60    0.48
 -11   2  -1    3.98    0.44
 -11   2  -1    3.06    0.48
 -11   2  -1    2.06    0.47
  11   2   1    3.20    0.54
 -11   2  -1    2.69    0.48
 -11   2  -1    2.72    0.52
  11   2   1    4.07    0.58
  11   2   1    3.43    0.48
 -12  -2  -1    2.02    0.66
  12  -2   1    1.67    0.35
 -12  -2  -1    1.65    0.56
 -12  -2  -1    1.46    0.44
 -12  -2  -1    1.36    0.50
 -12  -2  -1    1.38    0.56
 -12  -2  -1    1.98    0.51
 -12  -2  -1    2.34    0.55
 -12  -2  -1    1.99    0.51
 -12  -2  -1    1.96    0.33
  12  -2   1    0.74    0.51
  12  -2   1    1.87    0.55
  12  -2   1    1.81    0.75
 -12  -2  -1    1.49    0.43
  12  -2   1    1.97    0.45
  12  -2   1    1.77    0.43
 -12  -2  -1    1.76    0.41
  12  -2   1    0.83    0.43
  12  -2   1    0.42    0.70
  12  -2   1    0.86    0.48
 -12   2  -1    1.68    0.51
 -12   2  -1    2.04    0.35
  12   2   1    2.12    0.63
 -12   2  -1    2.30    0.56
  12   2   1    1.54    0.33
 -12   2  -1    1.50    0.41
 -12   2  -1    1.62    0.48
 -12   2  -1    1.50    0.46
 -12   2  -1    2.73    0.54
 -12   2  -1    1.90    0.56
 -12   2  -1    2.15    0.54
 -12   2  -1    2.35    0.67
  12   2   1    2.28    0.51
  12   2   1    2.40    0.59
  12   2   1    1.41    0.35
 -12   2  -1    1.96    0.65
  12   2   1    1.12    0.49
  12   2   1    2.74    0.62
 -13  -2  -1   -0.53    0.53
  13  -2   1    0.69    0.69
 -13  -2  -1    0.55    0.43
  13  -2   1    0.25    0.50
  13  -2   1    0.46    0.95
 -13  -2  -1    0.52    0.63
  13  -2   1    0.78    0.49
  13  -2   1   -0.14    0.57
  13  -2   1    0.40    0.91
  13  -2   1    0.42    0.36
 -13  -2  -1    0.18    0.54
  13  -2   1    0.32    0.86
 -13  -2  -1    0.68    0.50
 -13  -2  -1   -0.61    0.50
 -13  -2  -1    0.28    0.55
 -13  -2  -1    0.06    0.62
  13  -2   1    0.41    0.47
 -13  -2  -1   -0.42    0.56
 -13  -2  -1   -0.27    0.64
 -13  -2  -1    0.27    0.38
 -13   2  -1    0.33    0.55
 -13   2  -1    0.01    0.69
 -13   2  -1   -0.43    0.54
 -13   2  -1    0.39    0.59
  13   2   1    1.04    0.37
 -13   2  -1    1.02    0.56
  13   2   1    0.19    0.37
 -13   2  -1    0.84    0.75
 -13   2  -1    1.18    0.56
  13   2   1    0.56    0.57
 -13   2  -1    0.50    0.42
  13   2   1    0.08    0.58
  13   2   1    0.21    0.62
 -13   2  -1    0.67    0.36
  13   2   1    0.28    0.60
 -13   2  -1    1.13    0.76
 -13   2  -1    0.50    0.51
  14  -2   1   -0.45    0.63
 -14  -2  -1   -0.48    0.65
 -14  -2  -1   -0.29    0.73
  14  -2   1   -0.13    0.96
 -14  -2  -1    0.47    0.64
 -14  -2  -1   -0.54    0.59
 -14  -2  -1    0.13    0.51
  14  -2   1   -0.10    0.57
 -14  -2  -1   -0.10    0.58
  14  -2   1    0.96    0.76
 -14  -2  -1   -0.47    0.68
 -14  -2  -1    0.21    0.71
 -14  -2  -1    0.29    0.73
  14  -2   1    0.11    0.40
 -14  -2  -1    0.10    0.64
  14  -2   1    0.42    0.66
 -14  -2  -1   -0.47    0.62
  14  -2   1   -0.21    0.66
  14   2   1    0.74    0.82
 -14   2  -1    0.99    0.88
 -14   2  -1    0.15    0.68
 -14   2  -1   -0.01    0.49
  14   2   1    1.03    0.76
  14   2   1   -0.10    0.64
 -14   2  -1    0.10    0.58
  14   2   1   -0.07    0.44
  14   2   1    0.01    0.66
 -14   2  -1   -0.18    0.66
 -14   2  -1   -0.04    0.67
 -14   2  -1   -0.43    0.70
 -14   2  -1   -0.01    0.42
 -14   2  -1   -0.33    0.71
  14   2   1   -0.60    0.42
 -14   2  -1    0.10    0.58
 -14   2  -1    0.12    0.89
 -15  -2  -1    0.16    0.87
  15  -2   1    1.58    0.70
 -15  -2  -1    0.62    0.80
  15  -2   1    0.72    0.77
  15  -2   1    0.35    0.92
  15  -2   1    0.32    1.11
  15  -2   1    1.06    0.82
  15  -2   1    0.78    1.00
 -15  -2  -1    0.50    0.75
  15  -2   1   -0.17    0.74
 -15  -2  -1    1.48    0.89
 -15  -2  -1    1.01    0.61
  15  -2   1    0.70    0.48
 -15  -2  -1    0.32    0.73
 -15  -2  -1   -0.13    0.82
 -15  -2  -1    1.25    0.96
 -15  -2  -1    0.31    0.76
 -15  -2  -1    0.46    0.86
  15  -2   1   -0.08    1.13
  15   2   1   -0.11    0.81
 -15   2  -1    1.26    1.06
 -15   2  -1   -0.17    0.83
  15   2   1    0.51    0.52
 -15   2  -1    1.25    0.50
  15   2   1    0.09    0.51
 -15   2  -1    0.95    0.59
 -15   2  -1    0.82    0.94
 -15   2  -1    0.63    0.79
 -15   2  -1    1.02    1.09
  15   2   1    0.30    1.05
  15   2   1    1.29    0.80
 -15   2  -1    0.01    0.93
 -15   2  -1   -0.35    1.03
  15   2   1    0.36    0.98
 -15   2  -1    0.54    0.69
 -15   2  -1    0.56    0.79
  15  -3  -1   -0.48    1.22
 -15  -3   1    0.10    0.70
 -15  -3   1    1.39    0.93
  15  -3  -1   -0.03    0.79
 -15  -3   1    0.73    0.87
  15  -3  -1    0.66    0.57
 -15  -3   1   -0.25    0.68
  15  -3  -1   -0.33    1.26
  15  -3  -1    0.11    0.81
  15  -3  -1   -0.54    0.80
  15  -3  -1   -0.25    0.90
 -15  -3   1   -0.25    0.81
 -15  -3   1    0.23    0.81
 -15  -3   1    0.22    0.91
  15  -3  -1   -0.76    0.76
 -15  -3   1    0.44    0.79
 -15  -3   1   -0.08    0.71
  15  -3  -1    0.55    0.62
 -15   3   1    0.27    0.56
 -15   3   1   -0.78    1.04
  15   3  -1   -0.19    0.43
  15   3  -1    0.87    0.90
 -15   3   1    0.38    0.82
  15   3  -1   -0.54    0.60
 -15   3   1   -0.66    0.96
 -15   3   1    0.28    0.79
  15   3  -1    0.69    0.93
 -15   3   1    1.17    1.05
 -15   3   1   -0.49    0.72
  15   3  -1    0.03    0.45
 -15   3   1    0.45    0.78
 -15   3   1    0.37    0.88
  15   3  -1   -0.51    0.61
 -15   3   1    0.33    0.86
 -14  -3   1    0.20    0.60
 -14  -3   1    0.08    0.56
  14  -3  -1    0.21    1.01
  14  -3  -1    0.56    0.61
  14  -3  -1    0.10    0.54
 -14  -3   1    0.17    0.68
 -14  -3   1    0.76    0.62
  14  -3  -1    0.68    0.81
 -14  -3   1    0.28    1.36
  14  -3  -1    0.69    0.60
 -14  -3   1    0.86    0.68
 -14  -3   1    0.65    1.37
 -14  -3   1    0.78    0.56
  14  -3  -1    0.51    0.49
  14  -3  -1    1.02    0.96
 -14  -3   1    0.65    0.77
  14  -3  -1    0.37    0.70
  14  -3  -1   -0.57    0.95
  14   3  -1    0.80    0.73
 -14   3   1    0.38    0.69
 -14   3   1    0.25    0.88
 -14   3   1    0.08    0.72
 -14   3   1   -0.06    0.73
  14   3  -1   -0.52    0.52
 -14   3   1    0.28    0.47
 -14   3   1    0.36    0.63
  14   3  -1   -0.20    0.51
 -14   3   1    1.05    0.66
 -14   3   1    0.68    0.90
  14   3  -1    0.29    0.39
 -14   3   1   -0.73    0.65
  14   3  -1    0.16    0.37
 -14   3   1    0.05    0.65
  14   3  -1    0.31    0.73
 -13  -3   1    2.36    0.58
 -13  -3   1    1.15    0.66
 -13  -3   1    1.88    1.01
 -13  -3   1    2.58    1.05
 -13  -3   1    2.47    0.51
 -13  -3   1    1.11    0.54
  13  -3  -1    2.23    0.60
  13  -3  -1    2.43    0.91
  13  -3  -1    2.08    0.60
  13  -3  -1    2.61    0.91
  13  -3  -1    2.69    0.54
  13  -3  -1    2.38    0.46
 -13  -3   1    2.37    0.53
  13  -3  -1    1.77    0.63
  13  -3  -1    2.12    0.65
  13  -3  -1    2.45    0.71
 -13  -3   1    2.01    0.49
 -13  -3   1    1.17    0.57
  13   3  -1    2.80    0.71
 -13   3   1    1.74    0.58
  13   3  -1    2.19    0.37
 -13   3   1    1.05    0.68
  13   3  -1    2.75    0.72
 -13   3   1    2.39    0.61
 -13   3   1    1.30    0.62
  13   3  -1    1.52    0.35
 -13   3   1    0.92    0.53
 -13   3   1    2.02    0.77
 -13   3   1    2.03    0.39
 -13   3   1    3.22    0.80
  13   3  -1    1.19    0.47
 -13   3   1    1.73    0.67
  13   3  -1    1.10    0.48
 -12  -3   1   11.00    0.95
 -12  -3   1   11.96    0.97
  12  -3  -1    9.69    1.04
 -12  -3   1   10.69    0.96
 -12  -3   1   10.51    0.98
  12  -3  -1   12.31    0.97
  12  -3  -1   11.15    1.15
 -12  -3   1   11.47    0.93
  12  -3  -1   11.24    0.84
 -12  -3   1   11.48    0.85
  12  -3  -1   11.51    1.17
 -12  -3   1   11.85    0.99
  12  -3  -1   10.86    0.99
  12  -3  -1   11.91    0.88
 -12  -3   1   12.92    0.90
 -12  -3   1   11.95    0.86
 -12   3   1   10.62    0.97
 -12   3   1   11.36    0.95
 -12   3   1   11.98    0.96
 -12   3   1   12.20    0.79
  12   3  -1    9.49    1.37
  12   3  -1   11.02    0.76
 -12   3   1   11.84    0.94
  12   3  -1   11.98    0.84
 -12   3   1   11.49    0.84
  12   3  -1   14.62    1.04
 -12   3   1   11.47    0.90
  12   3  -1   10.82    0.76
 -12   3   1   11.58    1.04
  12   3  -1   12.70    0.85
 -12   3   1   12.30    0.94
 -12   3   1   10.32    1.02
 -12   3   1   12.62    0.95
 -11  -3   1    3.08    0.43
 -11  -3   1    1.90    0.23
  11  -3  -1    0.75    0.62
 -11  -3   1    1.57    0.42
 -11  -3   1    1.60    0.24
  11  -3  -1    2.07    0.48
 -11  -3   1    1.93    0.59
  11  -3  -1    2.15    0.41
 -11  -3   1    2.22    0.48
 -11  -3   1    1.67    0.44
 -11  -3   1    1.76    0.47
  11  -3  -1    1.46    0.34
  11  -3  -1    1.25    0.64
  11  -3  -1    2.26    0.45
  11  -3  -1    1.76    0.56
  11  -3  -1    1.99    0.48
 -11  -3   1    0.86    0.75
  11  -3  -1    2.08    0.69
 -11   3   1    0.58    0.56
 -11   3   1    2.14    0.32
 -11   3   1    1.60    0.59
 -11   3   1    1.88    0.48
  11   3  -1    1.39    0.36
 -11   3   1    1.89    0.50
 -11   3   1    2.43    0.50
 -11   3   1    1.65    0.49
  11   3  -1    2.16    0.48
  11   3  -1    2.03    0.30
 -11   3   1    1.69    0.40
  11   3  -1    1.99    0.29
  11   3  -1    1.74    0.50
  11   3  -1    2.07    0.36
 -11   3   1    1.98    0.43
  10  -3  -1    0.43    0.36
  10  -3  -1    0.03    0.60
 -10  -3   1   -0.48    0.31
 -10  -3   1   -0.09    0.27
  10  -3  -1   -0.21    0.33
 -10  -3   1    0.19    0.32
  10  -3  -1    0.50    0.57
 -10  -3   1   -0.07    0.37
 -10  -3   1    0.10    0.27
  10  -3  -1    0.26    0.26
 -10  -3   1    0.01    0.37
 -10  -3   1    0.27    0.35
  10  -3  -1   -0.24    0.34
 -10  -3   1    0.26    0.41
 -10  -3   1    0.22    0.20
  10  -3  -1    0.10    0.35
  10  -3  -1   -0.10    0.41
  10  -3  -1    0.36    0.35
 -10  -3   1   -0.06    0.35
 -10   3   1    0.15    0.49
 -10   3   1    0.20    0.38
 -10   3   1    0.06    0.40
 -10   3   1    0.31    0.39
  10   3  -1    0.44    0.20
 -10   3   1    0.59    0.33
  10   3  -1    0.27    0.28
  10   3  -1    0.23    0.19
 -10   3   1    0.47    0.35
  10   3  -1    0.03    0.27
  10   3  -1    0.34    0.43
 -10   3   1    0.13    0.34
  10   3  -1   -0.02    0.38
 -10   3   1    0.46    0.46
 -10   3   1    0.37    0.25
  10   3  -1   -0.07    0.26
 -10   3   1   -0.39    0.47
  -9  -3   1    1.79    0.34
  -9  -3   1    2.87    0.31
  -9  -3   1    2.24    0.32
  -9  -3   1    1.87    0.34
  -9  -3   1    2.74    0.36
   9  -3  -1    2.60    0.35
   9  -3  -1    2.11    0.40
   9  -3  -1    2.84    0.36
   9  -3  -1    2.81    0.37
  -9  -3   1    2.06    0.39
   9  -3  -1    2.61    0.38
   9  -3  -1    2.79    0.37
   9  -3  -1    1.66    0.50
   9  -3  -1    2.35    0.50
  -9  -3   1    2.63    0.36
  -9  -3   1    2.71    0.33
  -9  -3   1    3.36    0.37
  -9  -3   1    2.82    0.37
   9  -3  -1    2.29    0.38
  -9   3   1    3.22    0.47
   9   3  -1    2.93    0.44
  -9   3   1    2.92    0.33
  -9   3   1    2.21    0.55
  -9   3   1    2.93    0.39
   9   3  -1    2.93    0.33
  -9   3   1    2.90    0.39
  -9   3   1    2.22    0.34
  -9   3   1    2.45    0.55
   9   3  -1    2.67    0.26
  -9   3   1    2.68    0.40
   9   3  -1    2.65    0.34
  -9   3   1    3.41    0.36
   9   3  -1    2.84    0.32
   9   3  -1    3.70    0.43
  -9   3   1    2.40    0.41
   9   3  -1    2.55    0.26
   8  -3  -1    8.23    0.58
  -8  -3   1    9.77    0.60
   8  -3  -1    8.17    0.60
   8  -3  -1    8.38    0.58
  -8  -3   1    7.29    0.58
  -8  -3   1    8.41    0.57
   8  -3  -1    6.90    0.61
  -8  -3   1    8.97    0.54
   8  -3  -1    7.38    0.63
   8  -3  -1    6.38    0.67
  -8  -3   1    8.35    0.57
  -8  -3   1    8.73    0.62
  -8  -3   1    8.07    0.57
   8  -3  -1    8.41    0.54
  -8  -3   1    9.00    0.53
  -8  -3   1    8.23    0.53
  -8  -3   1    8.11    0.62
   8  -3  -1    7.60    0.60
   8  -3  -1    6.84    0.66
   8   3  -1    7.21    0.52
  -8   3   1    8.30    0.59
   8   3  -1    8.18    0.55
   8   3  -1    7.55    0.63
   8   3  -1    7.74    0.63
   8   3  -1    7.95    0.52
  -8   3   1    8.01    0.59
  -8   3   1    7.60    0.57
  -8   3   1    8.68    0.63
  -8   3   1    7.89    0.60
  -8   3   1    8.51    0.59
   8   3  -1    7.65    0.49
  -8   3   1    7.72    0.60
  -8   3   1    8.62    0.54
   8   3  -1    7.61    0.50
  -7  -3   1    0.52    0.20
   7  -3  -1    0.71    0.25
  -7  -3   1    0.55    0.21
  -7  -3   1    0.79    0.21
   7  -3  -1    0.30    0.24
   7  -3  -1    0.30    0.34
  -7  -3   1    0.93    0.32
  -7  -3   1    0.34    0.21
  -7  -3   1    0.25    0.26
   7  -3  -1    0.36    0.19
   7  -3  -1    0.17    0.33
   7  -3  -1    0.49    0.18
  -7  -3   1    0.35    0.22
  -7  -3   1    0.53    0.16
   7  -3  -1    0.40    0.21
  -7  -3   1    0.69    0.14
  -7  -3   1    0.72    0.20
  -7  -3   1    0.44    0.17
   7  -3  -1    0.18    0.24
   7  -3  -1    0.08    0.23
  -7   3   1   -0.18    0.54
   7   3  -1    0.25    0.18
   7   3  -1    0.72    0.15
   7   3  -1    0.55    0.12
   7   3  -1    0.61    0.15
  -7   3   1    0.50    0.26
  -7   3   1    0.28    0.19
  -7   3   1    0.82    0.22
   7   3  -1    0.49    0.26
  -7   3   1    0.69    0.24
  -7   3   1    0.40    0.25
   7   3  -1    1.04    0.27
  -7   3   1    0.77    0.55
  -7   3   1    0.56    0.20
   7   3  -1    0.56    0.11
  -7   3   1    1.00    0.18
  -7   3   1    0.78    0.29
   6  -3  -1   33.88    1.95
  -6  -3   1   35.56    1.96
  -6  -3   1   32.89    1.94
  -6  -3   1   33.63    1.95
   6  -3  -1   35.39    1.97
   6  -3  -1   34.17    1.98
   6  -3  -1   33.76    1.99
  -6  -3   1   34.05    1.93
  -6  -3   1   34.35    1.97
   6  -3  -1   35.74    1.96
  -6  -3   1   33.95    1.96
   6  -3  -1   33.54    1.97
  -6  -3   1   33.45    1.94
  -6  -3   1   34.26    1.93
  -6  -3   1   34.17    1.93
  -6  -3   1   33.62    1.96
   6  -3  -1   35.70    1.94
  -6  -3   1   34.58    1.97
   6   3  -1   33.51    1.97
  -6   3   1   35.01    1.98
   6   3  -1   31.18    1.92
  -6   3   1   35.35    1.95
  -6   3   1   34.99    1.98
   6   3  -1   35.79    1.96
   6   3  -1   31.14    1.92
  -6   3   1   34.06    1.96
  -6   3   1   35.27    1.96
  -6   3   1   32.76    1.96
  -6   3   1   33.97    1.98
  -6   3   1   33.94    1.96
  -6   3   1   33.36    1.95
  -6   3   1   34.00    1.97
   6   3  -1   33.65    1.92
   6   3  -1   33.47    1.92
   5  -3  -1    2.49    0.30
  -5  -3   1    1.94    0.18
   5  -3  -1    2.31    0.27
   5  -3  -1    2.20    0.22
  -5  -3   1    2.31    0.20
   5  -3  -1    2.04    0.27
   5  -3  -1    2.19    0.24
   5  -3  -1    2.04    0.24
   5  -3  -1    2.08    0.24
  -5  -3   1    1.88    0.18
  -5  -3   1    1.98    0.21
   5  -3  -1    2.39    0.29
  -5  -3   1    2.04    0.27
  -5  -3   1    1.99    0.27
  -5  -3   1    1.75    0.21
   5  -3  -1    2.04    0.25
  -5  -3   1    2.18    0.24
  -5  -3   1    1.68    0.25
  -5   3   1    2.83    0.30
   5   3  -1    2.02    0.14
  -5   3   1    1.90    0.25
  -5   3   1    1.82    0.24
  -5   3   1    1.66    0.20
  -5   3   1    2.64    0.30
   5   3  -1    2.22    0.14
  -5   3   1    2.29    0.25
  -5   3   1    1.93    0.24
  -5   3   1    1.80    0.25
  -5   3   1    2.78    0.30
  -5   3   1    1.84    0.26
  -4  -3   1   17.08    1.12
   4  -3  -1   19.76    1.15
  -4  -3   1   20.60    1.18
   4  -3  -1   20.38    1.15
  -4  -3   1   19.57    1.15
   4  -3  -1   20.38    1.17
  -4  -3   1   18.70    1.12
   4  -3  -1   21.48    1.19
  -4  -3   1   19.78    1.13
  -4  -3   1   17.47    1.12
   4  -3  -1   20.04    1.15
  -4  -3   1   19.09    1.14
   4  -3  -1   20.09    1.14
   4  -3  -1   20.20    1.17
  -4  -3   1   19.52    1.15
  -4  -3   1   19.32    1.12
   4  -3  -1   19.90    1.15
  -4   3   1   20.33    1.16
  -4   3   1   20.03    1.15
  -4   3   1   20.53    1.13
  -4   3   1   20.70    1.17
  -4   3   1   19.13    1.15
  -4   3   1   19.91    1.16
  -4   3   1   19.73    1.15
  -4   3   1   21.29    1.14
  -4   3   1   18.56    1.15
  -3  -3   1   39.30    2.32
  -3  -3   1   40.50    2.34
   3  -3  -1   41.54    2.34
  -3  -3   1   41.30    2.33
   3  -3  -1   40.94    2.34
  -3  -3   1   36.14    2.38
   3  -3  -1   41.34    2.33
   3  -3  -1   41.11    2.34
   3  -3  -1   43.36    2.35
   3  -3  -1   43.30    2.35
   3  -3  -1   44.96    2.36
  -3  -3   1   38.49    2.32
  -3  -3   1   41.54    2.34
   3  -3  -1   41.18    2.33
  -3   3   1   41.72    2.34
  -3   3   1   40.31    2.33
  -3   3   1   41.38    2.34
  -3   3   1   41.29    2.34
  -3   3   1   43.51    2.35
  -3   3   1   41.24    2.34
  -3   3   1   41.90    2.36
  -3   3   1   39.86    2.32
  -3   3   1   41.57    2.34
   2  -3  -1    1.70    0.19
   2  -3  -1    1.31    0.16
  -2  -3   1    1.35    0.12
   2  -3  -1    1.50    0.17
   2  -3  -1    1.59    0.20
   2  -3  -1    1.65    0.19
   2  -3  -1    1.23    0.16
  -2  -3   1    1.23    0.15
  -2  -3   1    1.47    0.12
  -2  -3   1    1.81    0.20
  -2  -3   1    1.43    0.12
  -2  -3   1    1.69    0.16
  -2  -3   1    1.63    0.12
  -2  -3   1    1.45    0.14
   2  -3  -1    1.41    0.15
   2  -3  -1    1.29    0.17
  -2  -3   1    1.33    0.17
   2  -3  -1    2.11    0.24
  -2   3   1    1.48    0.16
   2   3  -1    1.76    0.10
  -2   3   1    1.11    0.16
  -2   3   1    2.14    0.20
  -2   3   1    1.34    0.17
   2   3  -1    1.12    0.16
  -2   3   1    1.23    0.17
   2   3  -1    1.25    0.16
   2   3  -1    1.40    0.10
  -2   3   1    1.76    0.16
  -2   3   1    1.32    0.17
  -2   3   1    2.08    0.20
  -2   3   1    1.32    0.20
   2   3  -1    1.30    0.10
  -2   3   1    1.22    0.09
  -1  -3   1   35.62    1.92
  -1  -3   1   32.97    1.92
   1  -3  -1   35.69    1.93
   1  -3  -1   36.86    1.96
  -1  -3   1   35.02    1.92
  -1  -3   1   36.08    1.92
   1  -3  -1   31.86    1.93
  -1  -3   1   34.72    1.92
   1  -3  -1   34.09    1.93
   1  -3  -1   33.79    1.93
   1  -3  -1   32.36    1.93
   1  -3  -1   35.41    1.93
   1  -3  -1   33.61    1.93
  -1  -3   1   32.62    1.92
  -1  -3   1   34.42    1.94
  -1  -3   1   34.75    1.93
  -1  -3   1   32.75    1.93
   1  -3  -1   35.66    1.94
  -1   3   1   31.18    1.93
  -1   3   1   33.75    1.93
   1   3  -1   33.26    1.92
   1   3  -1   32.04    1.94
  -1   3   1   32.69    1.93
  -1   3   1   35.63    1.93
   1   3  -1   34.68    1.92
  -1   3   1   36.38    1.93
   1   3  -1   34.17    1.93
   1   3  -1   34.89    1.92
   1   3  -1   34.59    1.92
  -1   3   1   32.28    1.93
  -1   3   1   36.55    1.96
  -1   3   1   31.67    1.93
   1   3  -1   33.02    1.93
   1   3  -1   33.41    1.92
   0  -3  -1   41.35    2.20
   0  -3   1   36.47    2.16
   0  -3  -1   40.19    2.17
   0  -3   1   39.43    2.17
   0  -3   1   36.24    2.17
   0  -3  -1   39.16    2.17
   0  -3   1   38.33    2.19
   0  -3  -1   37.66    2.18
   0  -3  -1   38.24    2.18
   0  -3  -1   40.80    2.17
   0  -3   1   40.41    2.18
   0  -3  -1   38.92    2.17
   0  -3  -1   37.18    2.18
   0  -3   1   37.93    2.18
   0  -3  -1   40.48    2.16
   0  -3  -1   37.55    2.18
   0  -3   1   40.03    2.17
   0   3  -1   37.61    2.18
   0   3   1   40.96    2.20
   0   3   1   37.39    2.18
   0   3  -1   37.74    2.17
   0   3   1   36.83    2.18
   0   3  -1   41.30    2.17
   0   3  -1   36.50    2.16
   0   3   1   39.25    2.17
   0   3   1   37.26    2.17
   0   3   1   36.67    2.18
   0   3  -1   38.01    2.17
   0   3  -1   35.92    2.17
   0   3  -1   40.02    2.17
   0   3   1   36.95    2.17
   0   3  -1   37.93    2.18
   0   3   1   39.09    2.17
   1  -3   1   21.90    1.24
   1  -3   1   22.45    1.26
  -1  -3  -1   22.85    1.25
   1  -3   1   21.94    1.27
   1  -3   1   23.46    1.27
   1  -3   1   23.11    1.26
  -1  -3  -1   20.90    1.27
  -1  -3  -1   21.17    1.26
  -1  -3  -1   23.90    1.25
   1  -3   1   22.72    1.26
   1  -3   1   21.91    1.26
  -1  -3  -1   20.46    1.26
  -1  -3  -1   24.03    1.29
   1  -3   1   22.57    1.27
  -1  -3  -1   21.01    1.25
   1  -3   1   23.20    1.26
   1  -3   1   24.05    1.29
  -1  -3  -1   21.19    1.25
   1   3   1   20.02    1.24
   1   3   1   20.59    1.24
   1   3   1   22.30    1.24
  -1   3  -1   21.48    1.26
   1   3   1   21.95    1.24
  -1   3  -1   22.19    1.26
  -1   3  -1   23.48    1.26
  -1   3  -1   21.18    1.27
  -1   3  -1   21.85    1.26
  -1   3  -1   20.98    1.24
   2  -3   1   19.84    1.08
   2  -3   1   19.12    1.08
   2  -3   1   18.54    1.09
   2  -3   1   19.62    1.10
   2  -3   1   20.17    1.11
   2  -3   1   19.67    1.06
   2  -3   1   19.17    1.09
   2  -3   1   18.12    1.08
   2  -3   1   18.65    1.09
   2  -3   1   20.26    1.09
  -2   3  -1   18.62    1.08
  -2   3  -1   17.09    1.08
  -2   3  -1   18.86    1.08
  -2   3  -1   17.08    1.12
  -2   3  -1   18.13    1.06
  -2   3  -1   18.14    1.09
  -2   3  -1   18.83    1.09
   3  -3   1    6.91    0.43
   3  -3   1    6.97    0.44
   3  -3   1    6.74    0.46
   3  -3   1    7.24    0.45
   3  -3   1    6.71    0.43
   3  -3   1    8.02    0.47
  -3  -3  -1    5.63    0.47
   3  -3   1    7.56    0.46
   3  -3   1    7.28    0.47
  -3   3  -1    5.47    0.45
  -3   3  -1    6.87    0.45
  -3   3  -1    6.88    0.40
  -3   3  -1    7.30    0.43
  -3   3  -1    6.49    0.45
  -3   3  -1    6.16    0.44
  -3   3  -1    6.84    0.43
  -3   3  -1    6.98    0.44
  -3   3  -1    7.26    0.45
  -3   3  -1    7.04    0.46
  -4  -3  -1    1.32    0.12
   4  -3   1    1.14    0.24
   4  -3   1    1.84    0.30
  -4  -3  -1    0.93    0.10
  -4  -3  -1    0.98    0.20
  -4  -3  -1    1.07    0.20
  -4  -3  -1    1.14    0.13
  -4  -3  -1    1.06    0.18
   4  -3   1    1.07    0.18
   4  -3   1    1.48    0.19
   4  -3   1    1.65    0.22
   4  -3   1    1.29    0.17
  -4  -3  -1    1.17    0.10
   4  -3   1    1.02    0.24
  -4  -3  -1    1.09    0.22
  -4  -3  -1    1.28    0.17
   4  -3   1    1.00    0.18
  -4   3  -1    1.43    0.18
  -4   3  -1    1.19    0.17
  -4   3  -1    1.46    0.17
  -4   3  -1    1.31    0.19
  -4   3  -1    1.65    0.23
  -4   3  -1    1.95    0.23
  -4   3  -1    1.65    0.23
  -4   3  -1    0.98    0.13
  -4   3  -1    0.97    0.18
  -5  -3  -1    3.38    0.37
   5  -3   1    4.92    0.40
   5  -3   1    4.90    0.43
  -5  -3  -1    4.19    0.27
  -5  -3  -1    4.39    0.27
  -5  -3  -1    3.42    0.36
   5  -3   1    3.85    0.44
  -5  -3  -1    3.69    0.38
  -5  -3  -1    4.63    0.29
  -5  -3  -1    3.97    0.35
   5  -3   1    3.79    0.35
   5  -3   1    4.65    0.42
  -5  -3  -1    4.69    0.29
   5  -3   1    4.00    0.33
  -5  -3  -1    4.97    0.38
   5  -3   1    4.19    0.36
  -5   3  -1    4.51    0.36
  -5   3  -1    4.19    0.35
  -5   3  -1    3.82    0.32
  -5   3  -1    4.01    0.37
  -5   3  -1    4.62    0.34
  -5   3  -1    4.04    0.38
  -5   3  -1    4.07    0.36
  -5   3  -1    4.20    0.29
   6  -3   1   20.10    1.28
  -6  -3  -1   19.91    1.25
  -6  -3  -1   21.78    1.27
  -6  -3  -1   20.60    1.21
  -6  -3  -1   20.78    1.21
  -6  -3  -1   20.68    1.26
  -6  -3  -1   22.80    1.27
   6  -3   1   22.48    1.27
  -6  -3  -1   20.61    1.22
  -6  -3  -1   21.31    1.23
   6  -3   1   21.00    1.24
   6  -3   1   20.62    1.28
   6  -3   1   20.01    1.26
   6  -3   1   21.19    1.26
  -6  -3  -1   21.07    1.22
   6  -3   1   22.17    1.24
   6  -3   1   21.06    1.25
  -6   3  -1   22.40    1.26
  -6   3  -1   21.48    1.22
  -6   3  -1   22.61    1.25
  -6   3  -1   20.98    1.26
  -6   3  -1   20.68    1.27
  -6   3  -1   20.91    1.26
  -6   3  -1   21.12    1.27
  -6   3  -1   21.57    1.24
  -6   3  -1   20.69    1.25
   7  -3   1    5.34    0.48
  -7  -3  -1    6.00    0.43
   7  -3   1    5.68    0.49
   7  -3   1    4.95    0.55
  -7  -3  -1    6.46    0.40
   7  -3   1    6.19    0.47
   7  -3   1    6.69    0.50
   7  -3   1    5.82    0.49
  -7  -3  -1    6.17    0.44
   7  -3   1    5.07    0.55
  -7  -3  -1    5.99    0.50
  -7  -3  -1    6.52    0.49
  -7  -3  -1    5.42    0.44
   7  -3   1    6.10    0.51
   7  -3   1    6.28    0.45
  -7  -3  -1    6.15    0.40
  -7  -3  -1    6.80    0.70
  -7  -3  -1    6.43    0.50
   7   3   1    5.58    0.36
  -7   3  -1    7.58    0.56
   7   3   1    5.78    0.55
  -7   3  -1    5.71    0.49
   7   3   1    5.95    0.36
  -7   3  -1    6.18    0.57
   7   3   1    5.25    0.38
  -7   3  -1    5.96    0.48
  -7   3  -1    6.22    0.44
   7   3   1    5.59    0.38
  -7   3  -1    6.91    0.56
  -7   3  -1    6.73    0.42
  -7   3  -1    6.23    0.57
  -7   3  -1    5.74    0.47
  -7   3  -1    5.81    0.49
  -8  -3  -1    7.61    0.54
  -8  -3  -1    7.22    0.62
   8  -3   1    7.59    0.55
   8  -3   1    7.92    0.55
   8  -3   1    7.30    0.66
  -8  -3  -1    6.80    0.60
   8  -3   1    7.55    0.61
  -8  -3  -1    7.78    0.52
  -8  -3  -1    7.00    0.50
   8  -3   1    7.67    0.60
  -8  -3  -1    6.90    0.60
  -8  -3  -1    7.38    0.60
  -8  -3  -1    7.55    0.49
  -8  -3  -1    7.18    0.55
  -8  -3  -1    7.73    0.54
   8  -3   1    7.00    0.55
   8  -3   1    7.39    0.67
   8  -3   1    7.34    0.56
  -8   3  -1    7.56    0.53
  -8   3  -1    7.67    0.62
  -8   3  -1    8.49    0.60
   8   3   1    7.45    0.49
   8   3   1    7.46    0.46
  -8   3  -1    7.43    0.56
  -8   3  -1    7.57    0.51
  -8   3  -1    7.80    0.63
  -8   3  -1    8.14    0.59
   8   3   1    7.37    0.46
   8   3   1    6.54    0.49
  -8   3  -1    7.44    0.59
  -8   3  -1    8.16    0.58
   8   3   1    7.53    0.65
  -9  -3  -1    1.03    0.35
  -9  -3  -1    1.03    0.32
  -9  -3  -1    1.22    0.28
   9  -3   1    1.24    0.48
  -9  -3  -1    0.85    0.24
   9  -3   1    0.75    0.32
  -9  -3  -1    1.63    0.33
  -9  -3  -1    1.22    0.35
   9  -3   1    1.17    0.44
   9  -3   1    2.08    0.34
  -9  -3  -1    0.63    0.32
   9  -3   1    1.38    0.44
  -9  -3  -1    0.96    0.24
  -9  -3  -1    1.38    0.39
  -9  -3  -1    1.03    0.28
   9  -3   1    1.49    0.30
   9  -3   1    1.19    0.29
   9  -3   1    1.94    0.48
   9  -3   1    2.12    0.49
  -9   3  -1    2.09    0.35
  -9   3  -1    0.76    0.34
  -9   3  -1    1.06    0.35
   9   3   1    0.88    0.24
  -9   3  -1    2.64    0.81
  -9   3  -1    0.83    0.24
   9   3   1    1.22    0.18
   9   3   1    0.73    0.18
  -9   3  -1    0.79    0.26
  -9   3  -1    0.21    0.76
   9   3   1    1.28    0.42
   9   3   1    1.02    0.24
  -9   3  -1    1.70    0.37
  -9   3  -1    1.47    0.33
  -9   3  -1    1.54    0.34
 -10  -3  -1    5.07    0.57
  10  -3   1    5.74    0.55
  10  -3   1    5.01    0.52
  10  -3   1    7.37    0.76
 -10  -3  -1    5.85    0.63
  10  -3   1    6.48    0.56
 -10  -3  -1    6.46    0.64
  10  -3   1    5.97    0.56
 -10  -3  -1    5.65    0.51
  10  -3   1    4.62    0.59
 -10  -3  -1    6.71    0.67
 -10  -3  -1    4.45    0.60
 -10  -3  -1    5.82    0.51
  10  -3   1    4.69    0.68
 -10  -3  -1    5.49    0.49
  10  -3   1    5.20    0.67
  10  -3   1    7.93    0.92
 -10  -3  -1    5.46    0.57
 -10  -3  -1    5.39    0.49
 -10   3  -1    5.14    0.59
  10   3   1    5.63    0.48
 -10   3  -1    5.75    0.59
  10   3   1    5.57    0.41
 -10   3  -1    6.10    0.59
 -10   3  -1    5.09    0.63
 -10   3  -1    4.61    0.50
  10   3   1    6.40    0.71
 -10   3  -1    5.25    0.58
 -10   3  -1    6.38    0.50
 -10   3  -1    6.52    1.00
 -10   3  -1    8.11    0.74
 -10   3  -1    9.18    1.07
  10   3   1    5.21    0.48
  10   3   1    5.82    0.42
  11  -3   1    4.51    0.60
  11  -3   1    5.35    0.50
  11  -3   1    2.91    0.49
  11  -3   1    2.23    0.75
 -11  -3  -1    4.38    0.49
 -11  -3  -1    4.01    0.46
  11  -3   1    5.03    0.62
  11  -3   1    3.37    0.51
 -11  -3  -1    4.87    0.66
  11  -3   1    4.55    0.48
 -11  -3  -1    3.31    0.51
 -11  -3  -1    4.49    0.64
 -11  -3  -1    3.43    0.61
 -11  -3  -1    4.01    0.44
 -11  -3  -1    3.88    0.60
  11  -3   1    3.79    0.76
  11  -3   1    5.08    0.57
 -11   3  -1    5.03    0.65
  11   3   1    4.07    0.47
 -11   3  -1    4.52    0.81
 -11   3  -1    4.04    0.48
  11   3   1    3.90    0.60
 -11   3  -1    3.68    0.62
 -11   3  -1    4.18    0.49
 -11   3  -1    4.04    0.51
 -11   3  -1    4.79    0.61
  11   3   1    4.00    0.44
 -11   3  -1    3.52    0.54
 -11   3  -1    3.43    0.55
 -11   3  -1    3.77    0.54
 -11   3  -1    7.36    0.92
 -12  -3  -1    6.33    0.78
 -12  -3  -1    6.08    0.55
  12  -3   1    5.87    0.84
  12  -3   1    6.98    0.69
  12  -3   1    6.09    0.72
 -12  -3  -1    5.57    0.63
 -12  -3  -1    6.20    0.78
 -12  -3  -1    5.18    0.74
  12  -3   1    5.54    0.78
  12  -3   1    6.21    0.59
  12  -3   1    3.27    0.83
 -12  -3  -1    5.90    0.63
 -12  -3  -1    6.05    0.78
 -12  -3  -1    4.41    0.60
 -12  -3  -1    5.85    0.63
  12  -3   1    6.06    0.82
 -12  -3  -1    5.84    0.94
  12  -3   1    4.95    0.84
 -12  -3  -1    4.97    0.95
  12  -3   1    4.23    0.64
  12   3   1    6.75    0.89
  12   3   1    5.29    0.48
 -12   3  -1    4.74    0.71
 -12   3  -1    6.45    0.61
 -12   3  -1    5.87    0.74
  12   3   1    5.27    0.59
  12   3   1    5.53    0.60
 -12   3  -1    6.16    0.57
 -12   3  -1    7.42    0.81
 -12   3  -1    4.79    0.82
 -12   3  -1    6.40    0.83
 -12   3  -1    6.90    0.82
 -12   3  -1    4.82    0.67
 -12   3  -1    5.39    0.73
 -12   3  -1    6.36    0.77
  12   3   1    5.46    0.49
 -13  -3  -1    2.92    0.39
 -13  -3  -1    2.61    0.72
  13  -3   1    3.27    0.48
 -13  -3  -1    2.43    0.50
  13  -3   1    1.88    0.69
 -13  -3  -1    2.94    0.63
  13  -3   1    1.90    0.66
 -13  -3  -1    3.14    0.51
 -13  -3  -1    2.74    0.61
  13  -3   1    1.09    0.87
  13  -3   1    0.81    0.63
 -13  -3  -1    1.68    0.61
 -13  -3  -1    1.59    0.59
 -13  -3  -1    1.69    0.50
  13  -3   1    1.67    0.68
  13  -3   1    1.96    0.54
  13  -3   1    2.42    0.86
  13  -3   1    1.64    0.63
 -13  -3  -1    1.28    0.54
 -13  -3  -1    2.30    0.66
 -13   3  -1    3.51    0.85
  13   3   1    3.30    0.49
 -13   3  -1    3.48    0.76
 -13   3  -1    1.77    0.59
 -13   3  -1    2.96    0.68
 -13   3  -1    2.29    0.47
  13   3   1    2.75    0.48
 -13   3  -1    1.35    0.63
 -13   3  -1    3.02    0.77
 -13   3  -1    2.59    0.45
  13   3   1    2.59    0.36
  13   3   1    2.29    0.36
 -13   3  -1    2.13    0.60
 -13   3  -1    2.32    0.63
  13   3   1    3.70    0.76
 -13   3  -1    2.01    0.64
 -14  -3  -1    0.22    0.53
  14  -3   1    0.79    0.60
  14  -3   1   -0.06    0.79
 -14  -3  -1    1.03    0.61
  14  -3   1    0.00    0.71
 -14  -3  -1    1.04    0.76
  14  -3   1   -0.26    1.11
 -14  -3  -1    0.30    0.54
 -14  -3  -1    0.25    0.77
 -14  -3  -1    0.55    0.77
 -14  -3  -1    0.27    0.62
  14  -3   1   -0.51    0.70
 -14  -3  -1    0.97    0.71
  14  -3   1    1.08    0.66
  14  -3   1    0.35    0.46
 -14  -3  -1    0.07    0.71
 -14  -3  -1    0.39    0.61
  14  -3   1    0.21    1.08
  14  -3   1    0.71    0.81
 -14  -3  -1    1.69    0.75
  14   3   1   -0.29    0.54
 -14   3  -1    0.56    0.70
  14   3   1   -0.07    0.39
 -14   3  -1    0.48    0.66
 -14   3  -1    0.11    0.54
 -14   3  -1    0.78    0.66
 -14   3  -1   -0.23    0.66
 -14   3  -1    0.39    0.73
 -14   3  -1    0.53    0.87
 -14   3  -1    0.37    0.47
 -14   3  -1    0.25    0.88
 -14   3  -1   -0.17    0.70
 -14   3  -1    0.23    0.74
  14   3   1    0.69    0.84
  14   3   1   -0.14    0.52
  14   3   1    0.08    0.37
  14  -4  -1    4.05    0.75
  14  -4  -1    3.44    1.09
  14  -4  -1    3.39    0.82
 -14  -4   1    3.36    0.62
  14  -4  -1    3.94    0.75
 -14  -4   1    4.31    0.82
 -14  -4   1    3.23    0.78
 -14  -4   1    4.02    0.64
 -14  -4   1    5.48    0.81
 -14  -4   1    2.56    0.80
 -14  -4   1    4.45    0.76
  14  -4  -1    5.66    0.72
  14  -4  -1    4.09    0.79
 -14  -4   1    7.57    1.12
 -14  -4   1    5.71    0.74
  14  -4  -1    2.90    0.90
  14  -4  -1    3.13    1.11
  14  -4  -1    4.94    0.64
  14   4  -1    3.56    0.41
 -14   4   1    4.40    0.88
  14   4  -1    3.92    0.39
 -14   4   1    4.21    1.01
 -14   4   1    3.95    0.69
 -14   4   1    2.34    1.02
 -14   4   1    3.61    0.75
 -14   4   1    4.36    0.88
 -14   4   1    5.53    0.86
 -14   4   1    3.09    0.81
 -14   4   1    3.36    0.56
  13  -4  -1    1.33    0.64
 -13  -4   1    2.53    0.66
  13  -4  -1    0.94    0.64
  13  -4  -1    1.05    1.08
  13  -4  -1    1.63    0.66
 -13  -4   1    1.82    0.58
 -13  -4   1    1.79    0.68
  13  -4  -1    2.49    0.51
 -13  -4   1    2.52    0.68
  13  -4  -1    3.19    1.13
 -13  -4   1    2.60    0.51
 -13  -4   1    2.57    0.69
 -13  -4   1    3.27    0.61
 -13  -4   1    3.07    0.65
  13  -4  -1    3.08    0.59
 -13  -4   1    2.92    0.50
  13  -4  -1    2.34    0.77
  13  -4  -1    2.53    0.69
  13   4  -1    2.18    0.28
 -13   4   1    1.92    0.43
 -13   4   1    2.04    0.72
  13   4  -1    1.96    0.27
 -13   4   1    2.17    0.71
 -13   4   1    2.35    0.61
 -13   4   1    1.71    0.83
  13   4  -1    2.84    0.38
 -13   4   1    2.36    0.46
 -13   4   1    2.53    0.60
 -13   4   1    3.28    0.73
 -13   4   1    2.61    0.87
 -13   4   1    2.77    0.56
  13   4  -1    2.11    0.38
 -13   4   1    3.38    0.69
 -12  -4   1   -0.19    0.50
  12  -4  -1   -1.16    1.39
  12  -4  -1   -0.36    0.49
 -12  -4   1    0.01    0.38
 -12  -4   1   -0.27    0.46
 -12  -4   1    0.03    0.48
  12  -4  -1   -0.04    0.50
  12  -4  -1    0.08    0.52
  12  -4  -1    0.38    0.40
 -12  -4   1    0.26    0.38
 -12  -4   1    0.94    0.79
 -12  -4   1    0.31    0.58
 -12  -4   1    0.31    0.51
 -12  -4   1   -0.11    0.27
  12  -4  -1    0.54    0.57
 -12  -4   1    0.12    0.25
 -12  -4   1    0.85    0.55
  12  -4  -1   -0.21    0.51
  12  -4  -1   -0.91    1.45
  12  -4  -1    0.21    0.60
 -12   4   1   -0.18    0.47
  12   4  -1    0.09    0.20
 -12   4   1    0.40    0.70
 -12   4   1    0.03    0.50
 -12   4   1    0.65    0.57
 -12   4   1    0.24    0.50
 -12   4   1    0.16    0.44
 -12   4   1   -0.03    0.36
  12   4  -1   -0.22    0.24
 -12   4   1   -0.16    0.72
 -12   4   1    0.12    0.34
  12   4  -1    0.06    0.26
  12   4  -1   -0.18    0.20
 -12   4   1    0.26    0.59
 -12   4   1    0.14    0.57
 -11  -4   1   21.02    1.22
  11  -4  -1   20.99    1.27
 -11  -4   1   17.10    1.21
 -11  -4   1   18.77    1.23
 -11  -4   1   18.20    1.14
 -11  -4   1   18.70    1.15
  11  -4  -1   18.70    1.18
 -11  -4   1   17.59    1.20
 -11  -4   1   19.24    1.26
  11  -4  -1   17.65    1.23
 -11  -4   1   16.50    1.24
  11  -4  -1   18.67    1.21
  11  -4  -1   18.38    1.22
  11  -4  -1   17.71    1.31
 -11  -4   1   19.67    1.29
 -11  -4   1   17.65    1.14
 -11   4   1   17.60    1.31
 -11   4   1   19.50    1.20
 -11   4   1   18.88    1.25
 -11   4   1   19.32    1.26
 -11   4   1   18.47    1.25
  11   4  -1   18.00    1.08
  11   4  -1   17.83    1.08
  11   4  -1   18.32    1.07
  11   4  -1   18.01    1.07
 -11   4   1   17.59    1.24
 -11   4   1   20.73    1.16
 -11   4   1   19.61    1.30
 -11   4   1   18.58    1.26
 -11   4   1   18.97    1.33
 -11   4   1   18.51    1.15
 -10  -4   1    0.33    0.26
 -10  -4   1   -0.03    0.25
  10  -4  -1   -0.08    0.34
  10  -4  -1   -0.24    0.33
  10  -4  -1    0.22    0.67
  10  -4  -1    0.00    0.40
 -10  -4   1    0.08    0.35
 -10  -4   1   -0.09    0.45
  10  -4  -1   -0.27    0.38
  10  -4  -1    0.49    0.30
  10  -4  -1   -0.26    0.43
 -10  -4   1    0.68    0.38
 -10  -4   1    0.15    0.44
 -10  -4   1   -0.05    0.36
 -10  -4   1   -0.23    0.37
 -10  -4   1    0.31    0.38
 -10  -4   1   -0.42    0.36
  10  -4  -1   -0.81    0.57
 -10  -4   1    0.63    0.43
  10  -4  -1   -0.30    0.42
 -10   4   1   -0.04    0.58
 -10   4   1   -0.32    0.31
 -10   4   1    0.25    0.42
 -10   4   1    0.36    0.40
 -10   4   1   -0.23    0.36
 -10   4   1    0.03    0.46
 -10   4   1   -0.05    0.26
  10   4  -1    0.11    0.14
  10   4  -1    0.06    0.13
  10   4  -1   -0.02    0.16
 -10   4   1   -0.19    0.41
 -10   4   1   -0.19    0.28
 -10   4   1    0.03    0.47
 -10   4   1   -0.30    0.59
  10   4  -1    0.02    0.15
   9  -4  -1   28.82    1.63
   9  -4  -1   27.84    1.66
  -9  -4   1   27.63    1.59
  -9  -4   1   28.52    1.65
   9  -4  -1   29.02    1.61
   9  -4  -1   28.79    1.66
   9  -4  -1   27.26    1.63
  -9  -4   1   28.19    1.67
  -9  -4   1   26.65    1.61
   9  -4  -1   22.71    1.70
  -9  -4   1   27.70    1.58
  -9  -4   1   28.29    1.59
  -9  -4   1   29.15    1.64
  -9  -4   1   28.41    1.66
   9  -4  -1   25.80    1.67
   9  -4  -1   22.61    1.70
  -9  -4   1   26.80    1.61
   9  -4  -1   27.25    1.67
  -9  -4   1   27.30    1.63
  -9   4   1   26.84    1.65
  -9   4   1   28.30    1.61
   9   4  -1   25.33    1.54
  -9   4   1   26.73    1.65
   9   4  -1   24.85    1.54
  -9   4   1   28.81    1.64
  -9   4   1   29.57    1.69
   9   4  -1   26.25    1.54
   9   4  -1   25.87    1.54
  -9   4   1   28.19    1.69
  -9   4   1   28.20    1.66
  -9   4   1   28.05    1.68
  -9   4   1   30.01    1.61
  -9   4   1   27.92    1.64
   8  -4  -1   30.81    1.77
   8  -4  -1   26.84    1.85
  -8  -4   1   29.77    1.80
   8  -4  -1   29.55    1.75
  -8  -4   1   34.61    1.90
   8  -4  -1   29.37    1.79
  -8  -4   1   29.92    1.75
   8  -4  -1   25.48    1.84
  -8  -4   1   32.42    1.80
  -8  -4   1   31.28    1.78
  -8  -4   1   30.38    1.75
  -8  -4   1   29.16    1.73
  -8  -4   1   30.61    1.78
   8  -4  -1   33.56    1.80
  -8  -4   1   30.39    1.73
   8  -4  -1   29.01    1.77
  -8  -4   1   30.24    1.73
   8  -4  -1   30.12    1.79
  -8  -4   1   29.71    1.77
   8  -4  -1   29.36    1.80
  -8   4   1   31.10    1.75
  -8   4   1   30.52    1.79
  -8   4   1   29.67    1.78
  -8   4   1   30.79    1.82
  -8   4   1   27.97    1.78
  -8   4   1   30.68    1.75
  -8   4   1   32.16    1.81
  -8   4   1   29.42    1.78
  -8   4   1   30.72    1.81
  -8   4   1   29.72    1.79
  -7  -4   1    0.85    0.25
  -7  -4   1    0.41    0.25
   7  -4  -1    0.10    0.38
  -7  -4   1    0.55    0.25
  -7  -4   1    0.57    0.18
  -7  -4   1    0.63    0.24
   7  -4  -1    0.03    0.26
  -7  -4   1    0.41    0.44
   7  -4  -1    0.24    0.27
  -7  -4   1    0.57    0.26
  -7  -4   1    0.54    0.24
   7  -4  -1    0.53    0.21
  -7  -4   1    0.52    0.16
  -7  -4   1    0.16    0.28
  -7  -4   1    0.58    0.16
   7  -4  -1    1.09    0.34
   7  -4  -1    0.99    0.27
   7  -4  -1    0.28    0.31
   7  -4  -1    0.00    0.29
   7  -4  -1    0.85    0.39
  -7   4   1    0.52    0.35
  -7   4   1    0.14    0.19
  -7   4   1    0.40    0.23
  -7   4   1    0.55    0.31
  -7   4   1    0.62    0.34
  -7   4   1    0.64    0.24
  -7   4   1    0.36    0.36
  -7   4   1    0.30    0.22
  -7   4   1    0.53    0.25
  -7   4   1    1.07    0.31
  -6  -4   1   12.10    0.74
  -6  -4   1   10.65    0.67
  -6  -4   1   10.64    0.67
   6  -4  -1   12.45    0.71
   6  -4  -1   11.10    0.76
   6  -4  -1   11.56    0.72
  -6  -4   1   10.26    0.73
  -6  -4   1   11.59    0.75
  -6  -4   1   12.34    0.73
   6  -4  -1   10.51    0.78
   6  -4  -1   11.52    0.74
   6  -4  -1   11.21    0.75
   6  -4  -1   12.47    0.73
   6  -4  -1   11.54    0.79
  -6  -4   1   11.70    0.69
  -6  -4   1   12.13    0.74
  -6   4   1   11.35    0.74
  -6   4   1   11.28    0.78
  -6   4   1   12.31    0.77
  -6   4   1   11.39    0.69
  -6   4   1   10.96    0.74
  -6   4   1   10.60    0.73
  -6   4   1   10.43    0.73
  -6   4   1   10.80    0.76
  -6   4   1   11.57    0.73
  -6   4   1   11.88    0.72
  -5  -4   1    7.55    0.48
  -5  -4   1    7.72    0.54
   5  -4  -1    8.52    0.60
   5  -4  -1    7.64    0.53
   5  -4  -1    8.56    0.56
  -5  -4   1    7.36    0.49
  -5  -4   1    7.71    0.55
  -5  -4   1    8.23    0.51
  -5  -4   1    8.10    0.48
  -5  -4   1    8.48    0.55
   5  -4  -1    7.96    0.55
   5  -4  -1    8.66    0.58
   5  -4  -1    8.69    0.56
  -5  -4   1    7.23    0.49
   5  -4  -1    7.16    0.59
   5  -4  -1    7.85    0.54
  -5  -4   1    8.08    0.54
   5  -4  -1    8.48    0.53
  -5   4   1    8.44    0.54
  -5   4   1    7.76    0.49
  -5   4   1    7.76    0.55
  -5   4   1    8.16    0.53
  -5   4   1    8.45    0.54
  -5   4   1    7.84    0.58
  -5   4   1    8.21    0.54
  -5   4   1    8.20    0.54
  -5   4   1    8.78    0.61
  -5   4   1    8.08    0.58
   4  -4  -1    7.78    0.51
  -4  -4   1    6.58    0.45
  -4  -4   1    7.30    0.46
  -4  -4   1    6.66    0.40
   4  -4  -1    6.73    0.51
   4  -4  -1    6.03    0.45
   4  -4  -1    7.01    0.46
   4  -4  -1    6.39    0.46
   4  -4  -1    6.46    0.45
  -4  -4   1    7.07    0.48
  -4  -4   1    7.32    0.46
   4  -4  -1    6.68    0.46
  -4  -4   1    6.56    0.39
  -4  -4   1    7.07    0.44
   4  -4  -1    6.99    0.45
  -4  -4   1    6.57    0.40
  -4  -4   1    6.05    0.40
   4  -4  -1    6.58    0.50
  -4   4   1    6.63    0.40
  -4   4   1    6.39    0.48
  -4   4   1    6.44    0.46
  -4   4   1    6.79    0.46
  -4   4   1    6.91    0.45
  -4   4   1    6.71    0.52
  -4   4   1    5.89    0.45
  -4   4   1    6.03    0.45
  -4   4   1    6.51    0.45
  -4   4   1    7.60    0.49
   3  -4  -1   23.98    1.41
   3  -4  -1   24.51    1.38
  -3  -4   1   23.36    1.36
   3  -4  -1   25.30    1.37
   3  -4  -1   24.53    1.37
   3  -4  -1   24.78    1.40
   3  -4  -1   24.91    1.40
  -3  -4   1   21.50    1.34
  -3  -4   1   24.43    1.38
  -3  -4   1   23.15    1.34
   3  -4  -1   24.45    1.37
  -3  -4   1   22.86    1.38
   3  -4  -1   25.66    1.40
  -3  -4   1   24.65    1.37
  -3  -4   1   22.47    1.34
  -3  -4   1   24.25    1.39
   3  -4  -1   22.65    1.37
  -3  -4   1   22.35    1.34
  -3   4   1   22.75    1.37
  -3   4   1   21.92    1.34
  -3   4   1   21.96    1.37
  -3   4   1   24.26    1.33
  -3   4   1   23.97    1.38
  -3   4   1   24.06    1.41
  -3   4   1   25.41    1.38
  -3   4   1   24.99    1.37
  -3   4   1   23.15    1.37
  -3   4   1   23.77    1.38
  -3   4   1   23.65    1.37
  -2  -4   1   45.46    2.47
  -2  -4   1   43.64    2.45
   2  -4  -1   43.72    2.47
   2  -4  -1   46.13    2.48
  -2  -4   1   42.85    2.46
  -2  -4   1   43.32    2.45
   2  -4  -1   43.20    2.48
   2  -4  -1   42.59    2.47
   2  -4  -1   43.37    2.47
  -2  -4   1   43.04    2.46
  -2  -4   1   42.21    2.49
   2  -4  -1   45.99    2.48
  -2  -4   1   45.00    2.45
   2  -4  -1   42.37    2.47
  -2  -4   1   41.47    2.46
   2  -4  -1   45.29    2.48
  -2  -4   1   45.39    2.45
   2  -4  -1   43.89    2.50
  -2   4   1   43.99    2.47
  -2   4   1   42.96    2.48
   2   4  -1   41.43    2.45
   2   4  -1   43.35    2.45
   2   4  -1   41.23    2.45
  -2   4   1   43.05    2.47
  -2   4   1   44.63    2.48
   2   4  -1   44.57    2.45
  -2   4   1   42.52    2.48
  -2   4   1   42.12    2.48
  -2   4   1   44.98    2.50
   2   4  -1   42.85    2.49
   1  -4  -1   32.76    1.80
   1  -4  -1   31.83    1.83
  -1  -4   1   31.34    1.78
   1  -4  -1   31.28    1.80
   1  -4  -1   32.15    1.79
   1  -4  -1   30.42    1.78
  -1  -4   1   30.79    1.79
   1  -4  -1   31.10    1.79
   1  -4  -1   32.57    1.79
  -1  -4   1   32.14    1.78
  -1  -4   1   31.68    1.78
   1  -4  -1   30.90    1.78
  -1  -4   1   29.60    1.78
  -1  -4   1   32.70    1.79
  -1  -4   1   32.19    1.78
   1  -4  -1   32.44    1.81
  -1  -4   1   30.21    1.78
  -1  -4   1   31.46    1.81
   1   4  -1   32.18    1.77
  -1   4   1   30.27    1.79
  -1   4   1   33.06    1.83
   1   4  -1   31.67    1.77
   1   4  -1   30.77    1.81
   1   4  -1   31.40    1.79
   1   4  -1   32.83    1.77
   1   4  -1   31.42    1.77
  -1   4   1   30.30    1.78
   1   4  -1   29.84    1.79
  -1   4   1   30.99    1.78
   1   4  -1   31.45    1.78
  -1   4   1   29.99    1.79
   1   4  -1   31.18    1.78
  -1   4   1   32.48    1.79
  -1   4   1   32.12    1.79
  -1   4   1   29.47    1.80
   0  -4  -1   48.40    2.69
   0  -4   1   49.56    2.70
   0  -4   1   49.71    2.73
   0  -4  -1   49.34    2.71
   0  -4  -1   47.04    2.70
   0  -4   1   48.65    2.70
   0  -4  -1   49.82    2.74
   0  -4   1   44.98    2.69
   0  -4   1   46.11    2.70
   0  -4  -1   48.98    2.69
   0  -4  -1   48.71    2.69
   0  -4   1   47.29    2.70
   0  -4  -1   47.54    2.71
   0  -4  -1   50.13    2.69
   0  -4   1   47.39    2.71
   0  -4  -1   49.29    2.70
   0  -4   1   47.08    2.70
   0  -4   1   48.69    2.70
   0  -4  -1   50.36    2.70
   0  -4  -1   48.26    2.71
   0   4   1   46.07    2.71
   0   4  -1   46.48    2.71
   0   4  -1   50.21    2.70
   0   4  -1   45.68    2.69
   0   4  -1   45.49    2.70
   0   4   1   47.45    2.69
   0   4   1   46.95    2.71
   0   4  -1   46.55    2.69
   0   4   1   46.92    2.70
   0   4  -1   44.80    2.72
   0   4  -1   47.74    2.70
   0   4  -1   49.82    2.70
   0   4  -1   46.40    2.70
   0   4   1   47.21    2.69
   1  -4   1    0.61    0.17
   1  -4   1    0.86    0.17
   1  -4   1    0.89    0.14
   1  -4   1    0.77    0.14
  -1  -4  -1    1.06    0.13
  -1  -4  -1    0.69    0.14
   1  -4   1    0.80    0.12
   1  -4   1    0.87    0.14
   1  -4   1    1.08    0.19
  -1  -4  -1    1.06    0.17
  -1  -4  -1    1.09    0.16
   1  -4   1    0.65    0.14
   1  -4   1    0.85    0.08
  -1  -4  -1    0.94    0.11
  -1  -4  -1    0.86    0.10
   1  -4   1    1.08    0.22
  -1   4  -1    0.97    0.13
  -1   4  -1    0.98    0.16
  -1   4  -1    0.78    0.14
   1   4   1    0.86    0.10
  -1   4  -1    0.69    0.15
   1   4   1    0.88    0.10
   1   4   1    0.89    0.10
  -1   4  -1    1.20    0.16
  -1   4  -1    0.61    0.15
  -1   4  -1    0.75    0.09
   1   4   1    1.04    0.16
   1   4   1    0.83    0.13
  -1   4  -1    0.99    0.15
  -1   4  -1    0.66    0.15
   2  -4   1   19.96    1.18
  -2  -4  -1   18.22    1.20
  -2  -4  -1   20.34    1.16
   2  -4   1   20.42    1.16
  -2  -4  -1   19.97    1.20
   2  -4   1   21.49    1.20
   2  -4   1   21.22    1.19
  -2  -4  -1   20.00    1.19
   2  -4   1   21.90    1.23
  -2  -4  -1   20.52    1.22
   2  -4   1   20.65    1.18
  -2  -4  -1   19.99    1.19
   2  -4   1   20.30    1.19
  -2  -4  -1   20.93    1.16
  -2  -4  -1   22.20    1.16
   2  -4   1   21.03    1.19
  -2  -4  -1   20.38    1.16
   2  -4   1   20.88    1.20
   2  -4   1   21.68    1.20
  -2   4  -1   20.89    1.19
  -2   4  -1   19.42    1.16
  -2   4  -1   20.22    1.18
  -2   4  -1   19.68    1.18
  -2   4  -1   19.34    1.19
  -2   4  -1   21.00    1.21
  -2   4  -1   20.58    1.19
   3  -4   1  110.30    6.14
   3  -4   1  109.52    6.19
   3  -4   1  109.67    6.15
   3  -4   1  109.39    6.15
   3  -4   1  115.66    6.16
   3  -4   1  110.55    6.17
   3  -4   1  107.58    6.15
   3  -4   1  112.82    6.16
  -3   4  -1  110.99    6.15
  -3   4  -1  111.39    6.15
  -3   4  -1  102.25    6.14
  -3   4  -1  106.70    6.16
  -3   4  -1  103.99    6.12
  -3   4  -1  107.08    6.15
  -3   4  -1  109.84    6.14
   4  -4   1    1.81    0.25
   4  -4   1    2.06    0.27
   4  -4   1    1.39    0.29
   4  -4   1    2.16    0.23
   4  -4   1    1.41    0.23
   4  -4   1    1.86    0.22
   4  -4   1    1.64    0.28
   4  -4   1    1.63    0.29
   4  -4   1    1.81    0.22
  -4  -4  -1    1.21    0.25
  -4   4  -1    1.89    0.24
  -4   4  -1    1.82    0.24
  -4   4  -1    1.31    0.23
  -4   4  -1    2.44    0.24
  -4   4  -1    2.03    0.28
  -4   4  -1    2.61    0.29
  -4   4  -1    1.81    0.22
  -4   4  -1    2.37    0.29
  -4   4  -1    1.52    0.23
  -4   4  -1    1.27    0.15
   5  -4   1   11.68    0.84
  -5  -4  -1   13.25    0.74
  -5  -4  -1   12.75    0.74
  -5  -4  -1   12.87    0.82
  -5  -4  -1   12.59    0.74
  -5  -4  -1   12.32    0.83
   5  -4   1   12.85    0.83
   5  -4   1   12.70    0.81
   5  -4   1   13.20    0.80
   5  -4   1   11.95    0.80
  -5  -4  -1   12.82    0.81
  -5  -4  -1   13.16    0.84
   5  -4   1   13.77    0.81
   5  -4   1   12.51    0.81
  -5  -4  -1   13.05    0.74
   5  -4   1   12.22    0.85
   5  -4   1   13.34    0.82
  -5  -4  -1   14.03    0.79
  -5   4  -1   12.09    0.82
  -5   4  -1   13.55    0.75
  -5   4  -1   12.76    0.80
  -5   4  -1   12.45    0.83
  -5   4  -1   12.14    0.80
  -5   4  -1   13.73    0.82
  -5   4  -1   13.78    0.80
  -5   4  -1   12.73    0.81
  -5   4  -1   14.04    0.79
  -5   4  -1   12.47    0.80
  -6  -4  -1   -0.03    0.24
  -6  -4  -1    0.47    0.15
   6  -4   1    0.38    0.24
  -6  -4  -1    0.40    0.28
   6  -4   1    0.37    0.27
  -6  -4  -1    0.26    0.21
  -6  -4  -1    0.08    0.24
  -6  -4  -1    0.24    0.26
   6  -4   1    0.91    0.21
   6  -4   1    0.11    0.23
   6  -4   1   -0.53    0.39
  -6  -4  -1    0.57    0.11
  -6  -4  -1    0.39    0.11
   6  -4   1    0.18    0.24
   6  -4   1    0.52    0.40
  -6  -4  -1    0.38    0.20
  -6  -4  -1    0.58    0.15
   6  -4   1    0.73    0.22
   6  -4   1    0.68    0.22
  -6   4  -1    0.79    0.31
  -6   4  -1    0.40    0.18
  -6   4  -1    0.84    0.30
  -6   4  -1    0.84    0.29
  -6   4  -1    0.54    0.14
  -6   4  -1    0.25    0.28
  -6   4  -1    0.38    0.21
  -6   4  -1    0.34    0.29
  -6   4  -1    0.54    0.29
  -6   4  -1    0.77    0.21
  -7  -4  -1    0.89    0.29
   7  -4   1    0.18    0.31
  -7  -4  -1    1.06    0.30
  -7  -4  -1    0.74    0.30
  -7  -4  -1    0.47    0.21
   7  -4   1   -0.39    0.28
  -7  -4  -1    1.15    0.30
   7  -4   1    0.14    0.23
   7  -4   1   -0.14    0.33
  -7  -4  -1    0.06    0.26
  -7  -4  -1    0.38    0.15
   7  -4   1   -0.12    0.27
   7  -4   1    0.80    0.46
   7  -4   1    0.00    0.28
   7  -4   1   -0.44    0.28
  -7   4  -1   -0.08    0.25
  -7   4  -1    0.10    0.16
  -7   4  -1    0.08    0.27
  -7   4  -1   -0.27    0.33
  -7   4  -1   -0.29    0.33
  -7   4  -1    0.22    0.24
  -7   4  -1    0.09    0.27
  -7   4  -1    0.24    0.21
  -7   4  -1    0.01    0.23
  -7   4  -1   -0.46    0.31
  -8  -4  -1    1.60    0.31
  -8  -4  -1    1.75    0.29
  -8  -4  -1    1.87    0.35
   8  -4   1    1.61    0.34
  -8  -4  -1    1.81    0.36
   8  -4   1    2.06    0.36
   8  -4   1    1.48    0.34
   8  -4   1    1.24    0.36
  -8  -4  -1    2.19    0.39
   8  -4   1    2.27    0.31
  -8  -4  -1    2.13    0.25
  -8  -4  -1    2.43    0.29
   8  -4   1    1.82    0.35
  -8  -4  -1    2.25    0.25
  -8  -4  -1    2.89    0.36
  -8  -4  -1    2.80    0.29
   8  -4   1    1.86    0.33
  -8   4  -1    1.92    0.37
  -8   4  -1    2.50    0.30
  -8   4  -1    2.15    0.41
  -8   4  -1    2.13    0.43
  -8   4  -1    2.03    0.36
  -8   4  -1    1.48    0.30
  -8   4  -1    2.08    0.35
  -8   4  -1    2.09    0.25
  -8   4  -1    2.63    0.44
  -8   4  -1    1.41    0.31
   9  -4   1    6.50    1.10
  -9  -4  -1    6.91    0.64
  -9  -4  -1    6.83    0.65
  -9  -4  -1    6.74    0.48
  -9  -4  -1    5.39    0.66
   9  -4   1    8.83    1.16
   9  -4   1    6.98    0.58
  -9  -4  -1    6.43    0.53
   9  -4   1    6.58    0.63
   9  -4   1    7.40    0.58
  -9  -4  -1    5.74    0.58
  -9  -4  -1    6.32    0.48
   9  -4   1    8.36    0.81
   9  -4   1    6.00    0.65
   9  -4   1    7.64    0.59
  -9  -4  -1    6.52    0.54
  -9  -4  -1    5.45    0.62
   9  -4   1    6.52    0.59
  -9  -4  -1    6.69    0.54
  -9   4  -1    6.62    0.55
  -9   4  -1    6.02    0.50
  -9   4  -1    5.76    0.60
  -9   4  -1    7.13    0.65
  -9   4  -1    7.01    0.60
  -9   4  -1    7.28    0.71
  -9   4  -1    6.95    0.61
  -9   4  -1    6.88    0.63
  -9   4  -1    7.54    0.68
  -9   4  -1    8.08    0.58
  -9   4  -1    5.57    0.66
  10  -4   1    1.18    0.41
  10  -4   1    0.60    0.37
 -10  -4  -1    0.34    0.28
 -10  -4  -1    1.21    0.36
 -10  -4  -1    1.02    0.42
  10  -4   1    0.58    0.73
  10  -4   1    0.76    0.44
 -10  -4  -1   -0.08    0.40
  10  -4   1    0.81    0.68
 -10  -4  -1    1.20    0.43
  10  -4   1    0.62    0.38
 -10  -4  -1   -0.01    0.37
  10  -4   1    1.75    0.42
 -10  -4  -1    0.35    0.33
 -10  -4  -1    0.55    0.29
  10  -4   1   -0.05    0.69
  10  -4   1    0.43    0.34
 -10  -4  -1   -0.10    0.49
 -10  -4  -1    0.29    0.37
 -10   4  -1    1.00    0.56
 -10   4  -1    0.99    0.49
 -10   4  -1    0.87    0.39
 -10   4  -1    1.69    0.53
 -10   4  -1    0.40    0.45
 -10   4  -1    0.39    0.51
 -10   4  -1    0.48    0.26
 -10   4  -1    0.83    0.32
 -10   4  -1    0.68    0.50
 -10   4  -1    0.34    0.44
 -10   4  -1    0.64    0.36
 -11  -4  -1    1.29    0.34
 -11  -4  -1    1.24    0.51
  11  -4   1    1.04    0.46
 -11  -4  -1    0.66    0.46
  11  -4   1    1.04    0.79
 -11  -4  -1    1.33    0.35
 -11  -4  -1    2.55    0.60
  11  -4   1    1.17    0.53
 -11  -4  -1    1.22    0.41
  11  -4   1    1.36    0.81
  11  -4   1    1.82    0.52
 -11  -4  -1    1.82    0.48
 -11  -4  -1    1.56    0.46
  11  -4   1    1.63    0.48
 -11  -4  -1    1.42    0.38
  11  -4   1    0.74    0.40
  11  -4   1    1.00    0.48
 -11  -4  -1    2.06    0.50
  11  -4   1    1.12    0.41
 -11   4  -1    1.28    0.34
 -11   4  -1    1.42    0.50
 -11   4  -1    1.33    0.65
 -11   4  -1    2.60    0.51
 -11   4  -1    1.34    0.62
 -11   4  -1    1.09    0.44
 -11   4  -1    2.35    0.64
 -11   4  -1    1.28    0.53
 -11   4  -1    1.85    0.52
 -11   4  -1    1.80    0.39
 -11   4  -1    1.92    0.46
  12  -4   1    0.44    0.46
 -12  -4  -1    0.05    0.44
  12  -4   1    0.29    0.57
  12  -4   1   -0.45    0.51
 -12  -4  -1    0.25    0.41
  12  -4   1    0.43    0.45
 -12  -4  -1    0.51    0.51
 -12  -4  -1    0.83    0.66
  12  -4   1   -0.64    0.78
  12  -4   1    0.40    0.51
 -12  -4  -1    0.38    0.54
 -12  -4  -1    0.21    0.51
 -12  -4  -1    0.45    0.37
 -12  -4  -1    0.45    0.51
 -12  -4  -1    0.25    0.41
  12  -4   1    0.53    0.69
  12  -4   1    0.42    0.81
 -12  -4  -1    0.07    0.56
  12  -4   1    0.39    0.57
 -12  -4  -1    0.18    0.50
 -12   4  -1    0.25    0.39
 -12   4  -1    0.42    0.49
 -12   4  -1    0.30    0.42
 -12   4  -1    0.10    0.58
 -12   4  -1    0.68    0.53
 -12   4  -1    0.60    0.66
 -12   4  -1    1.35    0.69
 -12   4  -1    0.79    0.60
 -12   4  -1    0.68    0.60
 -12   4  -1    0.33    0.52
 -12   4  -1   -0.09    0.56
  13  -4   1    0.97    0.73
 -13  -4  -1   -0.84    0.59
 -13  -4  -1    0.38    0.76
 -13  -4  -1    0.39    0.56
  13  -4   1    0.03    0.63
 -13  -4  -1    0.14    0.58
 -13  -4  -1    0.37    0.49
 -13  -4  -1   -0.17    0.47
  13  -4   1    0.30    0.70
 -13  -4  -1   -0.35    0.63
  13  -4   1    0.56    0.95
 -13  -4  -1    0.36    0.40
  13  -4   1   -0.06    0.62
  13  -4   1    0.23    0.93
 -13  -4  -1   -0.57    0.63
 -13  -4  -1    0.37    0.52
  13  -4   1    0.48    0.49
  13  -4   1   -0.38    0.56
 -13  -4  -1    0.58    0.59
  13  -4   1   -0.22    0.61
 -13   4  -1    0.41    0.43
 -13   4  -1    0.54    0.80
 -13   4  -1    0.69    0.79
 -13   4  -1    0.27    0.47
 -13   4  -1    0.44    0.67
 -13   4  -1    0.77    0.78
 -13   4  -1    0.07    0.78
 -13   4  -1   -0.58    0.57
 -13   4  -1   -0.29    0.84
 -13   4  -1   -0.52    0.62
 -14  -4  -1    0.49    0.72
 -14  -4  -1    0.39    0.57
 -14  -4  -1    0.26    0.39
  14  -4   1    0.14    0.66
  14  -4   1    0.58    0.58
 -14  -4  -1    0.20    0.88
  14  -4   1   -0.51    0.78
 -14  -4  -1    0.33    0.60
 -14  -4  -1   -0.23    0.72
 -14  -4  -1    0.28    0.58
 -14  -4  -1   -0.16    0.65
 -14  -4  -1    0.30    0.76
  14  -4   1    0.27    0.78
  14  -4   1   -0.25    1.25
 -14  -4  -1   -0.28    0.75
 -14  -4  -1    0.13    0.74
  14  -4   1    0.01    0.65
  14  -4   1   -0.23    0.81
  14  -4   1    0.48    0.87
 -14  -4  -1   -0.18    0.43
  14  -4   1   -0.81    1.20
 -14   4  -1    0.05    0.83
 -14   4  -1    0.33    0.54
 -14   4  -1   -0.07    0.68
 -14   4  -1    0.34    0.89
 -14   4  -1    0.86    0.53
 -14   4  -1    0.89    0.97
 -14   4  -1    0.54    0.95
 -14   4  -1    0.53    0.76
 -14   4  -1    0.72    0.96
 -14   4  -1    1.01    0.90
 -14   4  -1    0.36    0.72
 -14  -5   1    1.83    0.74
 -14  -5   1    1.87    0.78
  14  -5  -1    2.35    0.84
 -14  -5   1    1.41    0.85
 -14  -5   1    1.83    0.58
  14  -5  -1    2.21    0.73
 -14  -5   1    2.04    0.75
  14  -5  -1    2.28    1.00
 -14  -5   1    2.43    0.87
 -14  -5   1    1.31    0.77
  14  -5  -1    0.75    1.22
  14  -5  -1    1.09    1.17
  14  -5  -1    1.42    0.63
 -14  -5   1    1.58    0.79
 -14  -5   1    1.48    0.56
  14  -5  -1    2.14    0.78
  14  -5  -1    1.93    0.87
  14  -5  -1    1.83    0.79
 -14   5   1    1.85    0.84
 -14   5   1    2.07    0.91
 -14   5   1    1.18    0.91
 -14   5   1    0.84    0.80
 -14   5   1    2.10    0.68
 -14   5   1    1.02    1.03
 -14   5   1    1.63    0.90
 -14   5   1    1.96    0.55
 -14   5   1    0.83    1.00
 -14   5   1    0.82    0.75
 -13  -5   1    0.02    0.47
  13  -5  -1    0.87    0.71
  13  -5  -1    0.78    0.72
  13  -5  -1    0.22    0.66
 -13  -5   1    1.04    0.69
  13  -5  -1   -0.18    1.15
 -13  -5   1    0.12    0.46
 -13  -5   1    0.53    0.64
  13  -5  -1    1.40    1.19
 -13  -5   1    0.06    0.62
  13  -5  -1   -0.46    0.64
 -13  -5   1   -0.18    0.61
 -13  -5   1   -0.02    0.70
  13  -5  -1    0.38    0.53
  13  -5  -1   -0.28    0.75
 -13  -5   1    0.32    0.62
  13  -5  -1    0.60    0.65
 -13  -5   1    0.56    0.61
 -13   5   1    0.60    0.98
 -13   5   1   -0.10    0.60
 -13   5   1    0.09    0.52
 -13   5   1   -0.45    0.76
 -13   5   1   -0.25    0.75
 -13   5   1   -0.55    0.98
 -13   5   1   -0.02    0.67
 -13   5   1    0.43    0.68
 -13   5   1    0.19    0.42
 -13   5   1    1.04    0.78
 -12  -5   1    0.53    0.54
  12  -5  -1    0.65    0.68
 -12  -5   1    0.16    0.38
  12  -5  -1    0.55    0.46
 -12  -5   1   -0.03    0.63
 -12  -5   1    0.09    0.53
  12  -5  -1    0.22    0.65
 -12  -5   1    0.44    0.54
  12  -5  -1    0.92    0.55
 -12  -5   1    0.05    0.38
  12  -5  -1    0.25    0.62
 -12  -5   1    0.80    0.54
 -12  -5   1    0.65    0.59
  12  -5  -1    0.23    0.91
  12  -5  -1   -0.02    0.87
  12  -5  -1   -0.39    0.61
  12  -5  -1    0.65    0.53
 -12  -5   1    0.35    0.31
 -12  -5   1    0.66    0.76
 -12  -5   1    0.21    0.39
 -12   5   1    0.07    0.36
 -12   5   1   -0.04    0.45
 -12   5   1    0.43    0.58
 -12   5   1    0.18    0.51
 -12   5   1   -0.28    0.74
 -12   5   1    0.99    0.64
 -12   5   1    0.24    0.67
 -12   5   1    0.24    0.64
 -12   5   1    0.57    0.42
 -12   5   1    0.22    0.78
 -12   5   1   -0.35    0.56
  11  -5  -1    4.83    0.89
 -11  -5   1    6.11    0.74
 -11  -5   1    5.77    0.63
 -11  -5   1    5.94    0.76
 -11  -5   1    6.16    0.68
  11  -5  -1    7.33    0.77
  11  -5  -1    6.25    0.73
 -11  -5   1    6.80    0.74
  11  -5  -1    7.05    0.85
  11  -5  -1    4.70    0.91
  11  -5  -1    7.87    0.81
  11  -5  -1    6.01    0.67
  11  -5  -1    6.91    0.77
 -11  -5   1    5.64    0.70
 -11  -5   1    6.27    0.54
  11  -5  -1    6.33    0.72
 -11  -5   1    6.08    0.52
 -11  -5   1    6.09    0.61
 -11  -5   1    6.35    0.75
 -11  -5   1    6.69    0.55
 -11   5   1    6.94    0.86
 -11   5   1    6.97    0.64
 -11   5   1    6.82    0.78
 -11   5   1    7.18    0.93
 -11   5   1    5.60    0.83
 -11   5   1    6.71    0.63
 -11   5   1    7.05    0.78
 -11   5   1    5.72    0.75
 -11   5   1    5.81    0.82
 -11   5   1    7.47    0.74
 -11   5   1    6.46    0.56
  10  -5  -1    0.72    0.66
 -10  -5   1    1.30    0.29
 -10  -5   1    1.08    0.46
  10  -5  -1    0.80    0.45
  10  -5  -1    1.14    0.36
 -10  -5   1    1.00    0.38
  10  -5  -1    1.01    0.47
  10  -5  -1    0.99    0.47
 -10  -5   1    0.56    0.38
 -10  -5   1    1.51    0.39
 -10  -5   1    0.82    0.40
  10  -5  -1    0.72    0.45
 -10  -5   1    1.31    0.41
  10  -5  -1    1.09    0.68
  10  -5  -1    1.11    0.40
 -10  -5   1    1.90    0.53
 -10  -5   1    0.92    0.39
  10  -5  -1    1.15    0.46
 -10   5   1    1.51    0.50
 -10   5   1    1.12    0.36
 -10   5   1    1.28    0.42
 -10   5   1    1.39    0.34
 -10   5   1    0.51    0.47
 -10   5   1    0.56    0.50
 -10   5   1    1.28    0.53
 -10   5   1    1.16    0.27
 -10   5   1    0.86    0.58
 -10   5   1    0.32    0.59
   9  -5  -1   -0.29    0.58
  -9  -5   1   -0.10    0.35
  -9  -5   1   -0.05    0.37
   9  -5  -1   -0.29    0.42
  -9  -5   1   -0.19    0.24
  -9  -5   1    0.45    0.38
  -9  -5   1    0.02    0.33
   9  -5  -1   -0.35    0.29
  -9  -5   1   -0.20    0.21
   9  -5  -1   -0.05    0.34
  -9  -5   1    0.15    0.21
   9  -5  -1    0.03    0.32
  -9  -5   1   -0.28    0.32
   9  -5  -1   -0.05    0.37
   9  -5  -1    0.29    0.48
  -9  -5   1    0.28    0.36
  -9  -5   1   -0.52    0.29
   9  -5  -1   -0.59    0.37
  -9  -5   1   -0.15    0.30
   9  -5  -1   -0.19    0.58
  -9   5   1   -0.59    0.52
  -9   5   1    0.02    0.33
  -9   5   1    0.03    0.35
  -9   5   1    0.01    0.27
  -9   5   1   -0.09    0.41
  -9   5   1   -0.09    0.42
  -9   5   1   -0.53    0.51
  -9   5   1   -0.50    0.29
  -9   5   1    0.30    0.33
  -9   5   1   -0.22    0.21
  -9   5   1   -0.17    0.45
   8  -5  -1    3.75    0.44
  -8  -5   1    2.80    0.31
   8  -5  -1    2.65    0.55
  -8  -5   1    1.87    0.38
  -8  -5   1    2.25    0.40
   8  -5  -1    3.03    0.39
   8  -5  -1    2.21    0.42
  -8  -5   1    3.13    0.41
  -8  -5   1    2.96    0.43
  -8  -5   1    2.79    0.31
  -8  -5   1    2.67    0.39
  -8  -5   1    2.23    0.37
   8  -5  -1    2.79    0.54
   8  -5  -1    2.39    0.39
  -8  -5   1    2.53    0.26
   8  -5  -1    1.45    0.43
  -8  -5   1    2.14    0.30
   8  -5  -1    3.21    0.40
  -8  -5   1    2.83    0.27
   8  -5  -1    2.39    0.34
  -8   5   1    2.75    0.41
  -8   5   1    2.46    0.33
  -8   5   1    3.67    0.53
  -8   5   1    3.09    0.55
  -8   5   1    2.24    0.54
  -8   5   1    2.87    0.29
  -8   5   1    2.50    0.38
  -8   5   1    2.92    0.40
  -8   5   1    2.87    0.38
  -8   5   1    3.15    0.42
  -8   5   1    3.36    0.44
  -7  -5   1    0.79    0.27
   7  -5  -1    2.46    0.47
  -7  -5   1    0.50    0.30
   7  -5  -1    1.50    0.35
   7  -5  -1    2.02    0.31
  -7  -5   1    1.36    0.17
  -7  -5   1    0.98    0.23
   7  -5  -1    1.08    0.46
   7  -5  -1    1.09    0.31
  -7  -5   1    1.33    0.22
  -7  -5   1    1.43    0.17
  -7  -5   1    0.85    0.31
  -7  -5   1    1.60    0.22
  -7  -5   1    1.19    0.32
   7  -5  -1    0.65    0.37
   7  -5  -1    1.35    0.26
   7  -5  -1    0.89    0.32
  -7  -5   1    1.45    0.30
   7  -5  -1    1.01    0.33
  -7   5   1    1.53    0.28
  -7   5   1    1.10    0.27
  -7   5   1    1.12    0.40
  -7   5   1    1.03    0.18
  -7   5   1    1.43    0.22
  -7   5   1    1.46    0.27
  -7   5   1    1.72    0.42
  -7   5   1    1.58    0.33
  -7   5   1    1.93    0.41
   6  -5  -1    9.27    0.75
  -6  -5   1    9.09    0.68
  -6  -5   1    9.70    0.66
   6  -5  -1    9.96    0.69
  -6  -5   1    9.64    0.63
  -6  -5   1    9.52    0.60
  -6  -5   1    9.49    0.60
  -6  -5   1   10.40    0.67
   6  -5  -1    9.55    0.68
  -6  -5   1    9.25    0.57
   6  -5  -1    9.55    0.74
   6  -5  -1   10.60    0.74
   6  -5  -1   10.04    0.65
  -6  -5   1    9.45    0.66
  -6  -5   1    9.26    0.57
  -6   5   1    8.59    0.66
  -6   5   1    9.69    0.66
  -6   5   1   10.47    0.58
  -6   5   1    9.25    0.75
  -6   5   1    9.84    0.68
  -6   5   1    9.28    0.75
  -6   5   1    9.97    0.75
  -6   5   1    9.42    0.66
  -6   5   1   11.05    0.66
  -6   5   1    9.68    0.59
  -6   5   1    9.82    0.67
  -5  -5   1    0.33    0.13
   5  -5  -1    0.04    0.21
   5  -5  -1   -0.05    0.24
   5  -5  -1    0.14    0.19
   5  -5  -1   -0.11    0.22
  -5  -5   1   -0.23    0.21
   5  -5  -1   -0.34    0.25
  -5  -5   1    0.35    0.20
   5  -5  -1    0.36    0.32
   5  -5  -1    0.19    0.32
  -5  -5   1   -0.12    0.25
  -5  -5   1    0.18    0.10
   5  -5  -1    0.21    0.31
  -5  -5   1    0.06    0.18
  -5  -5   1    0.04    0.10
  -5  -5   1   -0.08    0.13
   5  -5  -1    0.30    0.25
  -5  -5   1   -0.01    0.20
  -5   5   1   -0.01    0.18
  -5   5   1    0.18    0.31
  -5   5   1    0.11    0.23
  -5   5   1   -0.04    0.20
  -5   5   1    0.38    0.29
  -5   5   1    0.13    0.20
  -5   5   1    0.12    0.09
  -5   5   1    0.54    0.30
  -5   5   1    0.17    0.23
  -5   5   1    0.10    0.18
  -4  -5   1   28.08    1.64
   4  -5  -1   31.32    1.71
  -4  -5   1   31.21    1.68
   4  -5  -1   31.37    1.74
  -4  -5   1   29.06    1.68
   4  -5  -1   27.98    1.68
   4  -5  -1   27.10    1.68
  -4  -5   1   25.75    1.65
   4  -5  -1   29.85    1.69
  -4  -5   1   33.23    1.73
   4  -5  -1   29.93    1.70
  -4  -5   1   28.49    1.67
   4  -5  -1   28.99    1.69
   4  -5  -1   28.97    1.71
  -4  -5   1   27.71    1.71
  -4  -5   1   28.05    1.65
  -4  -5   1   28.37    1.65
   4  -5  -1   30.26    1.69
  -4  -5   1   29.68    1.69
  -4   5   1   28.99    1.70
  -4   5   1   28.55    1.69
  -4   5   1   28.45    1.70
  -4   5   1   31.45    1.74
  -4   5   1   30.45    1.68
  -4   5   1   28.23    1.64
  -4   5   1   28.19    1.68
  -4   5   1   26.50    1.64
  -4   5   1   30.18    1.71
  -4   5   1   29.07    1.69
   3  -5  -1    2.28    0.29
  -3  -5   1    2.49    0.25
   3  -5  -1    2.90    0.34
  -3  -5   1    2.47    0.29
  -3  -5   1    2.55    0.34
   3  -5  -1    3.00    0.27
  -3  -5   1    3.21    0.21
  -3  -5   1    2.31    0.26
  -3  -5   1    2.57    0.21
  -3  -5   1    3.17    0.24
   3  -5  -1    3.11    0.27
  -3  -5   1    2.88    0.21
   3  -5  -1    2.84    0.30
   3  -5  -1    2.99    0.28
   3  -5  -1    2.83    0.35
  -3  -5   1    2.84    0.21
   3  -5  -1    2.77    0.38
  -3   5   1    2.57    0.26
  -3   5   1    2.18    0.27
  -3   5   1    3.05    0.30
  -3   5   1    3.22    0.39
  -3   5   1    2.55    0.31
  -3   5   1    2.12    0.30
  -3   5   1    2.21    0.26
  -3   5   1    2.12    0.30
  -3   5   1    3.04    0.35
  -2  -5   1    0.01    0.11
  -2  -5   1    0.25    0.12
  -2  -5   1   -0.01    0.12
  -2  -5   1    0.24    0.14
   2  -5  -1   -0.09    0.24
  -2  -5   1    0.19    0.11
  -2  -5   1   -0.02    0.20
  -2  -5   1   -0.17    0.17
   2  -5  -1    0.40    0.17
   2  -5  -1   -0.01    0.14
  -2  -5   1    0.00    0.12
   2  -5  -1    0.22    0.18
   2  -5  -1    0.15    0.16
  -2  -5   1   -0.10    0.12
   2  -5  -1   -0.13    0.24
   2  -5  -1    0.11    0.14
   2  -5  -1   -0.15    0.26
   2  -5  -1    0.13    0.16
  -2   5   1    0.25    0.14
   2   5  -1    0.01    0.08
  -2   5   1    0.10    0.18
  -2   5   1    0.06    0.24
  -2   5   1    0.21    0.17
  -2   5   1    0.01    0.17
  -2   5   1    0.33    0.19
  -2   5   1   -0.04    0.18
  -2   5   1    0.02    0.16
   2   5  -1    0.07    0.08
  -2   5   1    0.11    0.20
   1  -5  -1    8.57    0.51
  -1  -5   1    8.34    0.50
   1  -5  -1    8.28    0.52
   1  -5  -1    7.97    0.53
  -1  -5   1    9.22    0.50
   1  -5  -1    8.05    0.54
   1  -5  -1    8.00    0.62
  -1  -5   1    7.76    0.49
   1  -5  -1    8.23    0.55
   1  -5  -1    8.94    0.54
  -1  -5   1    8.71    0.52
  -1  -5   1    8.61    0.54
  -1  -5   1    8.08    0.56
   1  -5  -1    8.39    0.55
  -1  -5   1    8.26    0.51
   1  -5  -1    8.72    0.53
   1   5  -1    7.74    0.50
  -1   5   1    7.92    0.51
  -1   5   1    8.24    0.54
   1   5  -1    9.17    0.50
  -1   5   1    8.60    0.53
   1   5  -1    7.84    0.52
   1   5  -1    8.57    0.50
  -1   5   1    9.04    0.55
  -1   5   1    7.28    0.51
   1   5  -1    7.30    0.50
   1   5  -1    7.39    0.54
   1   5  -1    8.42    0.50
   1   5  -1    8.24    0.57
   0  -5  -1   20.34    1.18
   0  -5  -1   21.42    1.20
   0  -5  -1   22.60    1.21
   0  -5  -1   21.20    1.27
   0  -5  -1   21.11    1.22
   0  -5  -1   21.11    1.20
   0  -5  -1   19.63    1.18
   0  -5   1   21.90    1.20
   0  -5  -1   20.55    1.22
   0  -5   1   21.67    1.23
   0  -5   1   22.84    1.21
   0  -5   1   20.07    1.20
   0  -5  -1   20.52    1.21
   0  -5   1   18.92    1.18
   0  -5   1   23.17    1.21
   0  -5  -1   21.97    1.21
   0  -5   1   20.78    1.22
   0  -5   1   19.27    1.21
   0  -5   1   21.90    1.20
   0  -5   1   23.47    1.28
   0   5   1   20.47    1.19
   0   5   1   19.30    1.19
   0   5   1   19.79    1.21
   0   5   1   21.28    1.20
   0   5  -1   19.49    1.21
   0   5   1   19.18    1.22
   0   5  -1   23.48    1.20
   0   5  -1   20.89    1.24
   0   5  -1   20.91    1.20
   0   5  -1   20.44    1.20
   0   5   1   20.45    1.20
   0   5   1   19.41    1.23
   0   5  -1   21.12    1.20
   0   5  -1   20.20    1.20
   0   5  -1   20.24    1.22
   1  -5   1   59.87    3.45
  -1  -5  -1   60.68    3.42
  -1  -5  -1   60.01    3.39
  -1  -5  -1   60.08    3.42
   1  -5   1   60.23    3.41
  -1  -5  -1   61.22    3.42
   1  -5   1   58.16    3.45
  -1  -5  -1   62.16    3.40
  -1  -5  -1   62.88    3.45
  -1  -5  -1   60.69    3.39
   1  -5   1   59.00    3.40
   1  -5   1   58.05    3.38
   1  -5   1   60.56    3.41
   1  -5   1   58.35    3.40
  -1  -5  -1   60.53    3.40
  -1  -5  -1   60.72    3.41
   1  -5   1   58.75    3.42
   1  -5   1   59.91    3.42
   1  -5   1   64.48    3.42
  -1  -5  -1   62.54    3.40
  -1   5  -1   59.38    3.38
  -1   5  -1   60.47    3.43
  -1   5  -1   58.86    3.40
  -1   5  -1   58.92    3.40
   1   5   1   61.10    3.39
   1   5   1   57.59    3.39
   1   5   1   59.34    3.39
   1   5   1   60.94    3.39
  -1   5  -1   60.34    3.41
  -1   5  -1   63.10    3.41
  -1   5  -1   64.30    3.41
  -1   5  -1   58.68    3.42
   1   5   1   57.95    3.42
  -1   5  -1   59.28    3.40
   1   5   1   59.85    3.41
   2  -5   1   56.19    3.17
   2  -5   1   56.56    3.18
   2  -5   1   55.64    3.17
  -2  -5  -1   59.79    3.21
   2  -5   1   55.32    3.17
  -2  -5  -1   55.16    3.14
  -2  -5  -1   54.02    3.16
  -2  -5  -1   56.70    3.17
   2  -5   1   56.24    3.21
  -2  -5  -1   56.98    3.15
   2  -5   1   54.47    3.13
  -2  -5  -1   55.99    3.18
  -2  -5  -1   56.84    3.14
  -2  -5  -1   56.52    3.18
   2  -5   1   54.67    3.16
  -2  -5  -1   58.29    3.15
   2  -5   1   57.26    3.18
  -2  -5  -1   56.66    3.16
   2  -5   1   56.58    3.16
   2  -5   1   53.77    3.17
  -2   5  -1   55.15    3.18
  -2   5  -1   52.71    3.16
  -2   5  -1   58.13    3.17
  -2   5  -1   54.32    3.17
  -2   5  -1   52.42    3.13
  -2   5  -1   52.78    3.17
  -2   5  -1   59.32    3.17
  -3  -5  -1   20.95    1.22
  -3  -5  -1   23.12    1.27
   3  -5   1   20.95    1.27
  -3  -5  -1   20.19    1.28
   3  -5   1   22.72    1.29
   3  -5   1   21.68    1.32
  -3  -5  -1   20.33    1.26
  -3  -5  -1   24.24    1.35
  -3  -5  -1   21.27    1.22
   3  -5   1   21.43    1.27
  -3  -5  -1   21.84    1.26
  -3  -5  -1   21.71    1.32
   3  -5   1   22.43    1.27
   3  -5   1   21.98    1.28
  -3  -5  -1   22.13    1.23
   3  -5   1   20.41    1.26
   3  -5   1   21.66    1.29
  -3  -5  -1   21.72    1.22
   3  -5   1   21.85    1.26
  -3   5  -1   21.82    1.26
  -3   5  -1   20.74    1.22
  -3   5  -1   22.17    1.27
  -3   5  -1   21.92    1.27
  -3   5  -1   22.21    1.29
  -3   5  -1   20.67    1.27
  -3   5  -1   20.53    1.27
  -4  -5  -1   12.51    0.78
  -4  -5  -1   12.00    0.81
   4  -5   1   11.97    0.78
   4  -5   1   12.25    0.83
   4  -5   1   12.79    0.78
  -4  -5  -1   13.07    0.79
   4  -5   1   12.41    0.79
   4  -5   1   13.87    0.80
   4  -5   1   12.10    0.83
   4  -5   1   13.41    0.81
   4  -5   1   13.38    0.80
   4  -5   1   13.59    0.85
  -4   5  -1   12.37    0.73
  -4   5  -1   12.04    0.78
  -4   5  -1   12.47    0.81
  -4   5  -1   11.75    0.79
  -4   5  -1   12.20    0.79
  -4   5  -1   14.04    0.79
  -4   5  -1   12.64    0.79
   5  -5   1    7.13    0.51
   5  -5   1    7.02    0.52
  -5  -5  -1    6.44    0.59
   5  -5   1    6.60    0.59
   5  -5   1    5.78    0.59
   5  -5   1    7.27    0.52
  -5  -5  -1    6.96    0.55
   5  -5   1    8.02    0.55
  -5  -5  -1    7.25    0.53
  -5  -5  -1    6.73    0.50
   5  -5   1    7.56    0.52
   5  -5   1    7.71    0.61
   5  -5   1    6.71    0.51
  -5   5  -1    7.03    0.52
  -5   5  -1    7.49    0.60
  -5   5  -1    6.48    0.50
  -5   5  -1    7.08    0.42
  -5   5  -1    6.57    0.58
  -5   5  -1    6.43    0.54
  -5   5  -1    7.71    0.52
  -5   5  -1    7.31    0.53
  -5   5  -1    6.99    0.58
  -5   5  -1    6.55    0.54
  -6  -5  -1   31.34    1.75
  -6  -5  -1   30.49    1.83
  -6  -5  -1   29.49    1.75
   6  -5   1   30.90    1.84
  -6  -5  -1   31.46    1.85
   6  -5   1   32.40    1.83
  -6  -5  -1   31.24    1.85
  -6  -5  -1   30.09    1.75
   6  -5   1   32.14    1.81
  -6  -5  -1   31.71    1.75
   6  -5   1   31.38    1.86
   6  -5   1   34.18    1.82
   6  -5   1   31.08    1.85
  -6  -5  -1   31.10    1.81
  -6  -5  -1   31.61    1.82
   6  -5   1   31.10    1.85
  -6  -5  -1   31.00    1.82
   6  -5   1   29.99    1.81
  -6   5  -1   30.32    1.85
  -6   5  -1   29.08    1.77
  -6   5  -1   31.61    1.81
  -6   5  -1   31.10    1.81
  -6   5  -1   31.19    1.83
  -6   5  -1   32.25    1.81
  -6   5  -1   29.66    1.81
  -6   5  -1   30.23    1.83
  -6   5  -1   31.32    1.83
  -6   5  -1   30.58    1.82
   7  -5   1    8.85    0.65
  -7  -5  -1    8.44    0.53
  -7  -5  -1    8.50    0.72
   7  -5   1    9.23    0.70
  -7  -5  -1    7.69    0.67
   7  -5   1   10.12    0.67
   7  -5   1    8.61    0.74
  -7  -5  -1    8.92    0.55
   7  -5   1    9.24    0.65
  -7  -5  -1    8.39    0.70
  -7  -5  -1    8.63    0.62
  -7  -5  -1    8.53    0.53
  -7  -5  -1    9.20    0.55
   7  -5   1    8.37    0.76
  -7  -5  -1    7.92    0.67
   7  -5   1    8.23    0.65
   7  -5   1    8.60    0.69
  -7  -5  -1    8.90    0.68
   7  -5   1    9.57    0.78
  -7   5  -1    8.60    0.71
  -7   5  -1    9.58    0.65
  -7   5  -1    9.22    0.71
  -7   5  -1    8.62    0.68
  -7   5  -1    8.93    0.66
  -7   5  -1    9.79    0.64
  -7   5  -1    9.68    0.70
  -7   5  -1    8.46    0.65
  -7   5  -1    9.15    0.65
  -7   5  -1    9.03    0.56
  -8  -5  -1    2.01    0.25
   8  -5   1    1.82    0.41
   8  -5   1    2.18    0.40
  -8  -5  -1    2.72    0.26
  -8  -5  -1    2.65    0.28
   8  -5   1    2.71    0.43
   8  -5   1    1.92    0.53
   8  -5   1    1.51    0.52
  -8  -5  -1    2.01    0.43
  -8  -5  -1    2.44    0.42
  -8  -5  -1    2.26    0.39
  -8  -5  -1    2.93    0.41
   8  -5   1    2.04    0.42
   8  -5   1    2.99    0.55
  -8  -5  -1    2.83    0.44
  -8  -5  -1    2.44    0.28
   8  -5   1    1.86    0.39
  -8  -5  -1    2.02    0.34
   8  -5   1    2.36    0.36
  -8   5  -1    1.28    0.39
  -8   5  -1    1.88    0.48
  -8   5  -1    3.11    0.36
  -8   5  -1    1.61    0.34
  -8   5  -1    2.23    0.31
  -8   5  -1    1.67    0.40
  -8   5  -1    1.88    0.38
  -8   5  -1    2.43    0.28
  -8   5  -1    1.85    0.47
  -8   5  -1    1.25    0.44
   9  -5   1   51.47    2.91
   9  -5   1   48.39    3.01
  -9  -5  -1   49.85    2.86
   9  -5   1   51.80    2.90
  -9  -5  -1   50.58    2.86
   9  -5   1   53.00    2.91
  -9  -5  -1   50.07    2.93
   9  -5   1   50.56    2.92
  -9  -5  -1   50.97    2.85
   9  -5   1   49.82    2.94
  -9  -5  -1   51.36    2.92
  -9  -5  -1   48.87    2.93
  -9  -5  -1   51.11    2.94
  -9  -5  -1   48.38    2.89
  -9  -5  -1   48.90    2.93
  -9  -5  -1   49.68    2.85
   9  -5   1   45.63    2.94
   9  -5   1   51.79    3.00
  -9   5  -1   50.00    2.89
  -9   5  -1   49.68    2.94
  -9   5  -1   49.06    2.94
  -9   5  -1   54.67    2.86
  -9   5  -1   49.71    2.92
  -9   5  -1   52.10    2.92
  -9   5  -1   51.23    2.90
  -9   5  -1   47.13    2.92
  -9   5  -1   48.95    2.94
  -9   5  -1   52.08    2.93
 -10  -5  -1    0.26    0.35
 -10  -5  -1    0.27    0.36
  10  -5   1    0.64    0.45
  10  -5   1    0.98    0.40
 -10  -5  -1    0.20    0.47
  10  -5   1   -0.39    0.67
  10  -5   1    0.45    0.59
  10  -5   1   -0.03    0.44
 -10  -5  -1    0.52    0.46
  10  -5   1    0.22    0.43
 -10  -5  -1    1.05    0.46
 -10  -5  -1    0.32    0.35
  10  -5   1    0.09    0.46
 -10  -5  -1   -0.13    0.68
  10  -5   1   -0.60    0.66
 -10  -5  -1    0.22    0.41
  10  -5   1    0.16    0.44
 -10   5  -1    0.85    0.58
 -10   5  -1    0.13    0.48
 -10   5  -1    0.18    0.49
 -10   5  -1    0.39    0.39
 -10   5  -1    0.80    0.47
 -10   5  -1    0.06    0.36
 -10   5  -1    0.20    0.56
 -10   5  -1    0.67    0.38
 -10   5  -1    0.74    0.29
 -10   5  -1    0.64    0.53
 -11  -5  -1    0.53    0.59
 -11  -5  -1    0.60    0.43
 -11  -5  -1    0.34    0.56
  11  -5   1    0.94    0.49
 -11  -5  -1    0.90    0.45
  11  -5   1    0.97    0.52
 -11  -5  -1    0.71    0.42
  11  -5   1    1.30    0.80
  11  -5   1    0.37    0.46
 -11  -5  -1    0.82    0.32
 -11  -5  -1    1.68    0.54
  11  -5   1    0.05    0.56
  11  -5   1    0.72    0.50
 -11  -5  -1    2.03    0.73
 -11  -5  -1    1.21    0.43
  11  -5   1    0.20    0.51
  11  -5   1    0.69    0.55
 -11  -5  -1    1.60    0.34
  11  -5   1    0.50    0.80
 -11   5  -1    0.34    0.53
 -11   5  -1    0.66    0.73
 -11   5  -1    1.45    0.59
 -11   5  -1    0.78    0.43
 -11   5  -1    1.07    0.58
 -11   5  -1    0.64    0.44
 -11   5  -1    1.09    0.44
 -11   5  -1    0.87    0.49
 -11   5  -1    1.81    0.75
 -11   5  -1    1.17    0.34
 -12  -5  -1   19.61    1.28
 -12  -5  -1   17.09    1.36
  12  -5   1   19.06    1.41
  12  -5   1   17.95    1.39
  12  -5   1   21.40    1.30
  12  -5   1   17.81    1.69
 -12  -5  -1   20.21    1.20
 -12  -5  -1   20.06    1.19
 -12  -5  -1   18.81    1.19
 -12  -5  -1   18.17    1.40
  12  -5   1   17.12    1.66
 -12  -5  -1   17.05    1.32
 -12  -5  -1   19.34    1.42
  12  -5   1   18.36    1.42
 -12  -5  -1   19.09    1.26
  12  -5   1   17.78    1.46
  12  -5   1   19.76    1.31
 -12  -5  -1   18.04    1.25
 -12  -5  -1   18.76    1.39
  12  -5   1   19.56    1.39
 -12  -5  -1   18.55    1.24
 -12   5  -1   18.98    1.20
 -12   5  -1   16.97    1.38
 -12   5  -1   18.78    1.44
 -12   5  -1   20.82    1.45
 -12   5  -1   16.00    1.43
 -12   5  -1   18.03    1.38
 -12   5  -1   16.64    1.35
 -12   5  -1   21.29    1.44
 -12   5  -1   19.57    1.29
 -12   5  -1   18.69    1.26
  13  -5   1   -0.50    0.69
  13  -5   1    0.19    0.72
  13  -5   1    0.17    1.07
 -13  -5  -1    0.02    0.47
 -13  -5  -1    0.10    0.43
  13  -5   1   -0.10    0.71
 -13  -5  -1    0.37    0.71
 -13  -5  -1    0.96    0.69
 -13  -5  -1   -0.74    0.79
 -13  -5  -1   -0.21    0.58
 -13  -5  -1    0.42    0.47
  13  -5   1    0.17    0.72
 -13  -5  -1    0.26    0.69
  13  -5   1    0.66    1.09
  13  -5   1   -0.27    0.60
 -13  -5  -1    0.16    0.67
  13  -5   1    0.29    0.59
 -13  -5  -1    0.53    0.58
 -13  -5  -1    0.07    0.56
 -13  -5  -1    0.05    0.49
  13  -5   1    0.62    0.76
 -13   5  -1    0.54    1.00
 -13   5  -1    1.18    0.97
 -13   5  -1    0.09    0.74
 -13   5  -1    0.29    0.52
 -13   5  -1    0.10    1.00
 -13   5  -1   -0.05    0.64
 -13   5  -1   -0.05    0.71
 -13   5  -1    0.55    0.44
 -13   5  -1   -0.35    0.59
 -14  -5  -1    4.74    0.91
  14  -5   1    5.02    1.31
 -14  -5  -1    5.32    0.90
  14  -5   1    4.57    0.85
 -14  -5  -1    3.71    0.85
 -14  -5  -1    6.82    0.78
  14  -5   1    3.80    0.89
  14  -5   1    5.17    1.36
  14  -5   1    4.20    1.04
 -14  -5  -1    6.59    0.94
  14  -5   1    5.17    0.77
 -14  -5  -1    4.64    0.61
 -14  -5  -1    5.19    0.90
 -14  -5  -1    7.42    0.78
  14  -5   1    4.91    1.00
 -14  -5  -1    5.25    1.05
  14  -5   1    5.32    0.84
 -14  -5  -1    6.58    0.67
  14  -5   1    3.77    0.91
 -14   5  -1    3.96    1.12
 -14   5  -1    4.68    0.91
 -14   5  -1    4.13    0.91
 -14   5  -1    6.80    0.78
 -14   5  -1    5.28    1.11
 -14   5  -1    4.26    0.82
 -14   5  -1    5.56    0.98
 -14   5  -1    5.93    1.02
 -14   5  -1    7.14    0.85
 -14   5  -1    5.12    1.12
 -14   5  -1    7.05    1.01
 -13  -6   1    0.24    0.74
 -13  -6   1    0.22    0.40
  13  -6  -1   -0.70    1.28
 -13  -6   1    0.10    0.68
  13  -6  -1   -0.10    0.73
 -13  -6   1    0.22    0.62
  13  -6  -1   -0.15    0.73
 -13  -6   1    0.18    0.70
 -13  -6   1    0.56    0.63
  13  -6  -1    0.55    0.74
  13  -6  -1   -1.00    1.20
 -13  -6   1    0.15    0.51
 -13  -6   1   -0.01    0.45
  13  -6  -1   -0.33    1.16
 -13  -6   1    0.18    0.45
  13  -6  -1   -0.41    0.61
  13  -6  -1    0.22    0.74
 -13  -6   1   -0.04    0.83
  13  -6  -1    0.09    0.66
 -13  -6   1   -0.24    0.75
 -13   6   1   -0.04    0.99
 -13   6   1    1.16    0.98
 -13   6   1   -0.14    0.90
 -13   6   1    0.10    0.54
 -13   6   1    0.16    0.74
 -13   6   1    0.76    0.81
 -13   6   1   -0.67    0.81
 -13   6   1   -0.24    0.67
 -13   6   1   -0.65    0.83
 -13   6   1    0.15    0.43
 -12  -6   1    4.30    0.76
  12  -6  -1    2.28    0.65
 -12  -6   1    3.09    0.66
 -12  -6   1    4.11    0.58
  12  -6  -1    3.83    0.74
  12  -6  -1    2.49    0.74
  12  -6  -1    2.64    0.70
 -12  -6   1    3.42    0.65
 -12  -6   1    3.83    0.55
  12  -6  -1    3.93    0.61
  12  -6  -1    3.61    1.20
  12  -6  -1    2.53    1.14
 -12  -6   1    3.60    0.44
  12  -6  -1    2.46    0.70
 -12  -6   1    3.07    0.73
  12  -6  -1    2.55    0.60
 -12  -6   1    5.09    0.61
 -12  -6   1    3.48    0.67
 -12  -6   1    4.04    0.52
 -12  -6   1    4.45    0.51
 -12   6   1    3.24    0.85
 -12   6   1    3.42    0.87
 -12   6   1    4.08    0.53
 -12   6   1    5.78    0.89
 -12   6   1    3.31    0.68
 -12   6   1    2.39    0.77
 -12   6   1    3.31    0.88
 -12   6   1    4.77    0.53
 -12   6   1    3.30    0.77
 -12   6   1    2.20    0.64
 -11  -6   1    7.82    0.97
  11  -6  -1    7.13    1.01
 -11  -6   1   11.31    0.71
  11  -6  -1   11.04    1.20
  11  -6  -1   10.94    0.92
 -11  -6   1   11.23    0.71
  11  -6  -1    9.58    0.96
  11  -6  -1    9.32    0.98
 -11  -6   1   10.48    0.93
 -11  -6   1   10.85    0.83
 -11  -6   1    9.50    0.82
  11  -6  -1   10.21    1.22
 -11  -6   1   10.83    0.75
 -11  -6   1   10.31    0.91
 -11  -6   1   10.26    0.90
 -11  -6   1   10.51    0.90
 -11  -6   1    9.83    0.97
  11  -6  -1   11.09    0.88
  11  -6  -1    9.49    0.92
 -11   6   1   14.52    1.32
 -11   6   1   10.15    1.09
 -11   6   1    9.65    0.72
 -11   6   1    9.73    0.92
 -11   6   1   10.80    0.84
 -11   6   1    9.67    0.97
 -11   6   1   10.22    1.06
 -11   6   1    9.47    0.79
 -11   6   1   10.48    0.98
 -11   6   1   11.19    1.05
 -11   6   1    9.77    0.97
 -10  -6   1   13.93    1.05
 -10  -6   1   13.74    1.00
  10  -6  -1   14.37    0.99
 -10  -6   1   13.62    1.02
 -10  -6   1   13.44    0.81
 -10  -6   1   13.13    0.89
  10  -6  -1   16.03    1.16
  10  -6  -1   13.34    0.96
 -10  -6   1   13.09    1.01
 -10  -6   1   13.85    0.82
  10  -6  -1   12.31    1.03
  10  -6  -1   12.67    1.19
 -10  -6   1   13.28    0.89
  10  -6  -1   10.96    1.20
  10  -6  -1   13.79    0.98
  10  -6  -1   10.21    1.06
 -10  -6   1   13.86    0.87
 -10  -6   1   10.93    0.97
  10  -6  -1   13.25    1.06
 -10  -6   1   12.89    0.99
 -10   6   1   12.78    0.83
 -10   6   1   13.70    1.08
 -10   6   1   13.03    1.01
 -10   6   1   12.81    1.09
 -10   6   1   11.71    1.08
 -10   6   1   13.64    0.98
 -10   6   1   12.76    1.14
 -10   6   1   12.91    1.09
 -10   6   1   13.28    0.87
 -10   6   1   13.48    0.93
 -10   6   1   10.99    1.01
   9  -6  -1    5.80    0.62
   9  -6  -1    5.90    0.59
   9  -6  -1    5.33    0.62
   9  -6  -1    3.84    0.82
  -9  -6   1    5.75    0.50
   9  -6  -1    5.95    0.86
  -9  -6   1    5.46    0.62
  -9  -6   1    5.74    0.62
  -9  -6   1    5.30    0.60
  -9  -6   1    6.33    0.50
  -9  -6   1    5.49    0.64
   9  -6  -1    5.62    0.73
  -9  -6   1    5.90    0.41
  -9  -6   1    5.55    0.51
  -9  -6   1    5.73    0.66
  -9  -6   1    5.44    0.40
   9  -6  -1    5.40    0.66
   9  -6  -1    6.00    0.65
  -9  -6   1    4.53    0.68
   9  -6  -1    5.57    0.71
  -9   6   1    5.15    0.43
  -9   6   1    4.98    0.72
  -9   6   1    5.75    0.62
  -9   6   1    4.48    0.66
  -9   6   1    7.32    0.94
  -9   6   1    6.60    0.77
  -9   6   1    5.62    0.59
  -9   6   1    4.65    0.61
  -9   6   1    7.21    0.76
  -9   6   1    5.57    0.66
  -9   6   1    5.25    0.47
   8  -6  -1    0.06    0.37
  -8  -6   1    0.09    0.38
  -8  -6   1    0.24    0.36
  -8  -6   1    0.37    0.38
   8  -6  -1    0.10    0.32
   8  -6  -1   -0.22    0.58
   8  -6  -1    0.23    0.38
  -8  -6   1    0.67    0.29
   8  -6  -1    0.38    0.35
  -8  -6   1    0.68    0.26
   8  -6  -1    0.19    0.47
   8  -6  -1    0.72    0.32
  -8  -6   1    0.84    0.18
  -8  -6   1    0.39    0.44
   8  -6  -1   -0.03    0.57
  -8  -6   1    0.07    0.34
  -8  -6   1    0.42    0.38
   8  -6  -1    0.36    0.38
  -8  -6   1    0.44    0.25
  -8  -6   1    0.26    0.17
  -8   6   1    0.29    0.35
  -8   6   1    0.32    0.23
  -8   6   1    0.51    0.18
  -8   6   1    0.13    0.50
  -8   6   1    0.26    0.44
  -8   6   1    0.46    0.37
  -8   6   1    0.40    0.49
  -8   6   1    0.42    0.32
  -8   6   1    0.28    0.45
  -8   6   1    0.27    0.32
  -8   6   1    0.21    0.51
  -7  -6   1    0.49    0.21
   7  -6  -1   -0.18    0.43
  -7  -6   1    0.50    0.33
  -7  -6   1    0.43    0.21
  -7  -6   1    0.20    0.29
   7  -6  -1    0.08    0.28
   7  -6  -1   -0.29    0.33
  -7  -6   1    0.06    0.14
   7  -6  -1   -0.01    0.34
  -7  -6   1    0.34    0.33
   7  -6  -1   -0.01    0.52
   7  -6  -1   -0.03    0.33
  -7  -6   1    0.37    0.14
   7  -6  -1   -0.55    0.49
  -7  -6   1   -0.26    0.34
  -7  -6   1    0.03    0.31
  -7  -6   1    0.46    0.26
   7  -6  -1    0.39    0.33
   7  -6  -1    0.35    0.31
  -7   6   1    0.23    0.27
  -7   6   1    0.34    0.14
  -7   6   1    0.15    0.35
  -7   6   1    0.58    0.30
  -7   6   1    0.41    0.43
  -7   6   1    0.42    0.50
  -7   6   1    0.41    0.31
  -7   6   1    0.22    0.35
  -7   6   1    0.38    0.44
  -7   6   1   -0.03    0.17
  -7   6   1    0.34    0.31
   6  -6  -1    0.02    0.30
  -6  -6   1    0.03    0.12
  -6  -6   1   -0.12    0.30
   6  -6  -1   -0.07    0.24
  -6  -6   1    0.36    0.31
  -6  -6   1   -0.31    0.29
   6  -6  -1    0.12    0.30
  -6  -6   1    0.01    0.16
   6  -6  -1   -0.13    0.29
  -6  -6   1   -0.24    0.18
  -6  -6   1   -0.18    0.26
   6  -6  -1    0.05    0.29
  -6  -6   1   -0.04    0.29
  -6  -6   1    0.00    0.24
  -6  -6   1    0.13    0.12
   6  -6  -1    0.13    0.44
   6  -6  -1    0.07    0.38
   6  -6  -1   -0.18    0.43
   6  -6  -1    0.28    0.27
  -6  -6   1    0.23    0.17
  -6   6   1    0.09    0.25
  -6   6   1    0.27    0.28
  -6   6   1    0.46    0.31
  -6   6   1    0.12    0.12
  -6   6   1    0.30    0.30
  -6   6   1    0.07    0.26
  -6   6   1   -0.07    0.47
  -6   6   1   -0.06    0.38
  -6   6   1   -0.08    0.25
  -6   6   1    0.05    0.39
  -6   6   1   -0.04    0.10
   5  -6  -1    1.62    0.31
   5  -6  -1    1.73    0.46
  -5  -6   1    1.53    0.29
  -5  -6   1    1.64    0.18
   5  -6  -1    1.02    0.41
  -5  -6   1    1.88    0.31
   5  -6  -1    2.62    0.31
   5  -6  -1    2.84    0.33
  -5  -6   1    1.84    0.21
  -5  -6   1    1.76    0.27
   5  -6  -1    1.88    0.29
   5  -6  -1    1.88    0.31
  -5  -6   1    1.39    0.30
  -5  -6   1    1.80    0.24
  -5  -6   1    2.00    0.36
  -5  -6   1    1.69    0.23
  -5  -6   1    1.64    0.21
  -5  -6   1    1.66    0.19
   5  -6  -1    2.26    0.47
   5  -6  -1    1.51    0.28
  -5   6   1    1.81    0.39
  -5   6   1    1.90    0.31
  -5   6   1    2.21    0.31
  -5   6   1    1.96    0.28
  -5   6   1    2.22    0.31
  -5   6   1    1.77    0.29
  -5   6   1    2.86    0.34
  -5   6   1    1.86    0.40
  -5   6   1    2.27    0.47
  -5   6   1    1.64    0.12
  -4  -6   1    0.81    0.22
  -4  -6   1    1.51    0.20
  -4  -6   1    1.16    0.29
   4  -6  -1    1.24    0.26
   4  -6  -1    0.71    0.34
  -4  -6   1    1.32    0.15
   4  -6  -1    0.94    0.28
   4  -6  -1    0.70    0.25
  -4  -6   1    1.17    0.25
  -4  -6   1    1.14    0.23
   4  -6  -1    0.79    0.41
   4  -6  -1    1.01    0.28
  -4  -6   1    1.11    0.25
  -4  -6   1    1.36    0.16
   4  -6  -1    0.99    0.34
   4  -6  -1    1.21    0.23
  -4  -6   1    1.09    0.15
  -4  -6   1    1.05    0.15
   4  -6  -1    1.24    0.25
  -4   6   1    0.67    0.23
  -4   6   1    0.69    0.27
  -4   6   1    1.95    0.28
  -4   6   1    1.08    0.35
  -4   6   1    1.17    0.24
  -4   6   1    1.28    0.33
  -4   6   1    0.80    0.28
  -4   6   1    1.32    0.23
  -4   6   1    2.07    0.34
   3  -6  -1   25.14    1.42
  -3  -6   1   24.39    1.42
   3  -6  -1   23.51    1.44
   3  -6  -1   23.24    1.40
   3  -6  -1   25.43    1.44
   3  -6  -1   23.25    1.42
   3  -6  -1   22.90    1.40
  -3  -6   1   25.11    1.38
  -3  -6   1   23.53    1.39
  -3  -6   1   24.04    1.38
  -3  -6   1   25.75    1.40
   3  -6  -1   24.31    1.43
  -3  -6   1   24.79    1.45
   3  -6  -1   23.60    1.49
  -3   6   1   23.80    1.42
  -3   6   1   24.43    1.43
  -3   6   1   21.49    1.48
  -3   6   1   24.40    1.41
  -3   6   1   23.49    1.43
  -3   6   1   23.89    1.41
  -3   6   1   25.43    1.43
  -2  -6   1   13.06    0.72
   2  -6  -1   11.55    0.75
   2  -6  -1   12.57    0.75
  -2  -6   1   11.65    0.72
  -2  -6   1   12.69    0.78
   2  -6  -1   13.30    0.77
  -2  -6   1   11.81    0.79
   2  -6  -1   12.47    0.77
   2  -6  -1   11.87    0.78
   2  -6  -1   12.85    0.87
  -2  -6   1   12.52    0.72
   2  -6  -1   11.37    0.75
   2  -6  -1   12.71    0.78
  -2  -6   1   11.83    0.77
   2  -6  -1   13.08    0.78
  -2  -6   1   12.32    0.73
   2   6  -1   12.00    0.70
  -2   6   1   10.93    0.74
  -2   6   1   11.81    0.77
  -2   6   1   12.19    0.78
  -2   6   1   12.02    0.75
   2   6  -1   11.77    0.70
   2   6  -1   12.02    0.70
  -2   6   1   11.93    0.75
   2   6  -1   11.15    0.70
  -1  -6   1   17.36    1.07
  -1  -6   1   18.15    1.06
  -1  -6   1   17.81    1.02
   1  -6  -1   16.98    1.06
   1  -6  -1   17.57    1.03
  -1  -6   1   17.28    1.01
   1  -6  -1   18.26    1.06
  -1  -6   1   16.66    1.04
   1  -6  -1   17.50    1.05
   1  -6  -1   17.95    1.03
   1  -6  -1   15.25    1.12
   1  -6  -1   18.04    1.04
   1  -6  -1   18.19    1.06
  -1  -6   1   16.34    1.12
   1  -6  -1   19.29    1.06
  -1  -6   1   15.45    1.03
  -1  -6   1   17.90    1.03
  -1  -6   1   17.41    1.02
  -1  -6   1   16.32    1.04
  -1   6   1   17.49    1.05
   1   6  -1   17.84    1.01
  -1   6   1   18.39    1.04
   1   6  -1   18.16    1.01
   1   6  -1   16.25    1.08
   1   6  -1   17.35    1.04
   1   6  -1   18.69    1.06
   1   6  -1   17.30    1.08
   1   6  -1   18.13    1.01
  -1   6   1   17.81    1.03
   1   6  -1   16.86    1.01
  -1   6   1   17.13    1.03
  -1   6   1   18.95    1.07
   0  -6  -1    4.99    0.42
   0  -6  -1    5.58    0.37
   0  -6   1    5.24    0.37
   0  -6   1    4.71    0.37
   0  -6  -1    5.89    0.38
   0  -6   1    4.56    0.32
   0  -6   1    5.62    0.43
   0  -6  -1    4.90    0.54
   0  -6  -1    6.21    0.44
   0  -6   1    5.12    0.42
   0  -6  -1    5.76    0.39
   0  -6  -1    5.19    0.32
   0  -6  -1    5.61    0.41
   0  -6   1    4.94    0.44
   0  -6  -1    4.83    0.41
   0  -6   1    5.08    0.54
   0  -6   1    5.48    0.42
   0  -6  -1    4.92    0.41
   0  -6   1    5.36    0.37
   0  -6  -1    4.64    0.32
   0  -6   1    5.52    0.39
   0   6  -1    5.24    0.43
   0   6  -1    5.82    0.36
   0   6   1    6.34    0.45
   0   6   1    4.83    0.35
   0   6  -1    4.12    0.40
   0   6   1    4.68    0.39
   0   6   1    5.10    0.42
   0   6  -1    5.36    0.46
   0   6  -1    5.39    0.37
   0   6   1    4.82    0.36
   0   6  -1    5.63    0.37
   0   6  -1    5.54    0.36
   0   6   1    5.78    0.37
   0   6  -1    5.42    0.37
   0   6   1    5.36    0.37
  -1  -6  -1   41.22    2.37
  -1  -6  -1   40.58    2.27
  -1  -6  -1   39.01    2.29
  -1  -6  -1   42.02    2.29
  -1  -6  -1   39.69    2.28
   1  -6   1   39.00    2.29
  -1  -6  -1   41.05    2.28
  -1  -6  -1   40.01    2.31
   1  -6   1   40.53    2.30
   1  -6   1   40.81    2.30
   1  -6   1   39.38    2.29
   1  -6   1   39.29    2.26
   1  -6   1   40.22    2.36
  -1  -6  -1   39.59    2.28
  -1  -6  -1   41.98    2.31
   1  -6   1   39.87    2.29
   1  -6   1   39.53    2.30
  -1  -6  -1   42.04    2.32
  -1  -6  -1   39.71    2.29
   1  -6   1   41.62    2.32
   1   6   1   39.56    2.27
  -1   6  -1   38.97    2.29
  -1   6  -1   39.28    2.31
   1   6   1   40.90    2.30
  -1   6  -1   39.80    2.31
  -1   6  -1   39.21    2.29
  -1   6  -1   39.99    2.29
  -1   6  -1   41.02    2.29
   1   6   1   39.08    2.27
   1   6   1   40.58    2.27
  -1   6  -1   41.45    2.33
   1   6   1   38.46    2.27
  -1   6  -1   40.77    2.29
   1   6   1   40.61    2.32
  -2  -6  -1    3.16    0.29
   2  -6   1    2.86    0.35
  -2  -6  -1    2.88    0.37
   2  -6   1    2.60    0.32
  -2  -6  -1    3.72    0.31
  -2  -6  -1    2.65    0.35
   2  -6   1    3.45    0.39
   2  -6   1    3.78    0.33
  -2  -6  -1    3.30    0.26
  -2  -6  -1    3.17    0.29
  -2  -6  -1    3.41    0.32
  -2  -6  -1    2.92    0.28
   2  -6   1    3.63    0.31
   2  -6   1    4.04    0.40
   2  -6   1    3.48    0.37
   2  -6   1    2.83    0.33
  -2  -6  -1    3.25    0.26
   2  -6   1    2.78    0.45
  -2  -6  -1    3.43    0.49
  -2   6  -1    3.57    0.32
  -2   6  -1    3.00    0.38
  -2   6  -1    2.94    0.35
  -2   6  -1    3.35    0.35
  -2   6  -1    3.08    0.30
  -2   6  -1    3.82    0.35
  -2   6  -1    3.36    0.32
  -2   6  -1    3.27    0.35
  -3  -6  -1   19.40    1.10
   3  -6   1   19.45    1.23
  -3  -6  -1   19.57    1.14
  -3  -6  -1   18.90    1.14
  -3  -6  -1   19.24    1.23
   3  -6   1   20.62    1.20
   3  -6   1   19.06    1.16
   3  -6   1   20.80    1.16
   3  -6   1   18.47    1.14
   3  -6   1   19.23    1.20
  -3  -6  -1   19.60    1.16
  -3  -6  -1   19.30    1.10
   3  -6   1   19.88    1.15
   3  -6   1   19.46    1.17
  -3  -6  -1   18.21    1.13
  -3  -6  -1   20.26    1.18
  -3  -6  -1   19.84    1.11
  -3  -6  -1   19.68    1.11
   3  -6   1   19.33    1.14
  -3   6  -1   17.67    1.14
  -3   6  -1   19.38    1.15
  -3   6  -1   18.49    1.18
  -3   6  -1   16.85    1.14
  -3   6  -1   19.67    1.16
  -3   6  -1   20.87    1.15
  -3   6  -1   17.32    1.16
   4  -6   1   26.59    1.54
  -4  -6  -1   26.40    1.48
  -4  -6  -1   25.75    1.53
   4  -6   1   27.12    1.55
  -4  -6  -1   25.82    1.48
   4  -6   1   24.95    1.53
  -4  -6  -1   25.21    1.53
   4  -6   1   24.83    1.54
   4  -6   1   25.38    1.53
  -4  -6  -1   25.53    1.48
   4  -6   1   24.69    1.60
  -4  -6  -1   25.57    1.54
  -4  -6  -1   27.36    1.48
   4  -6   1   29.82    1.60
   4  -6   1   26.90    1.59
  -4  -6  -1   27.03    1.61
   4  -6   1   27.79    1.56
  -4  -6  -1   25.61    1.56
  -4  -6  -1   26.30    1.53
  -4   6  -1   25.64    1.53
  -4   6  -1   24.86    1.55
  -4   6  -1   26.61    1.57
  -4   6  -1   24.94    1.48
  -4   6  -1   28.30    1.55
  -4   6  -1   26.49    1.54
  -4   6  -1   27.11    1.54
   5  -6   1    3.04    0.39
   5  -6   1    3.01    0.51
   5  -6   1    2.73    0.38
  -5  -6  -1    3.58    0.37
   5  -6   1    3.16    0.47
   5  -6   1    3.31    0.37
   5  -6   1    2.46    0.33
   5  -6   1    2.54    0.34
   5  -6   1    2.27    0.49
   5  -6   1    2.20    0.35
  -5  -6  -1    2.41    0.32
  -5  -6  -1    2.39    0.32
  -5  -6  -1    3.01    0.41
  -5  -6  -1    2.38    0.29
  -5  -6  -1    2.96    0.43
  -5   6  -1    3.18    0.36
  -5   6  -1    1.64    0.32
  -5   6  -1    2.90    0.34
  -5   6  -1    2.70    0.34
  -5   6  -1    2.50    0.35
  -5   6  -1    2.23    0.19
  -5   6  -1    2.76    0.35
  -6  -6  -1   -0.20    0.35
  -6  -6  -1    0.14    0.32
   6  -6   1   -0.29    0.27
   6  -6   1    0.03    0.30
   6  -6   1    0.15    0.37
  -6  -6  -1    0.12    0.26
  -6  -6  -1    0.30    0.29
   6  -6   1    0.12    0.43
   6  -6   1    0.73    0.33
   6  -6   1   -0.46    0.43
  -6  -6  -1   -0.13    0.32
   6  -6   1    0.42    0.31
   6  -6   1    0.60    0.30
  -6  -6  -1    0.00    0.25
  -6  -6  -1   -0.18    0.40
   6  -6   1   -0.12    0.42
  -6   6  -1    0.00    0.31
  -6   6  -1    0.40    0.28
  -6   6  -1    0.17    0.17
  -6   6  -1    0.21    0.27
  -6   6  -1    0.05    0.12
  -6   6  -1    0.07    0.25
  -6   6  -1    0.19    0.30
  -6   6  -1    0.31    0.30
  -7  -6  -1    0.79    0.28
   7  -6   1    0.31    0.51
  -7  -6  -1    0.92    0.34
  -7  -6  -1    1.27    0.44
  -7  -6  -1    0.86    0.10
   7  -6   1    0.82    0.36
   7  -6   1    0.45    0.38
  -7  -6  -1    0.48    0.35
   7  -6   1    0.79    0.52
  -7  -6  -1    0.86    0.10
   7  -6   1    0.61    0.42
   7  -6   1    0.90    0.33
  -7  -6  -1    1.03    0.38
  -7  -6  -1    0.69    0.43
   7  -6   1    0.11    0.31
  -7  -6  -1    0.34    0.33
   7  -6   1    1.29    0.32
   7  -6   1    0.03    0.37
  -7   6  -1    0.74    0.43
  -7   6  -1    0.58    0.30
  -7   6  -1    0.10    0.29
  -7   6  -1    0.77    0.43
  -7   6  -1    1.01    0.17
  -7   6  -1    1.33    0.49
  -7   6  -1    1.66    0.38
  -7   6  -1    0.44    0.27
  -7   6  -1    0.89    0.42
   8  -6   1    1.18    0.46
  -8  -6  -1    0.17    0.40
   8  -6   1    1.74    0.42
  -8  -6  -1    0.04    0.39
   8  -6   1    1.30    0.36
   8  -6   1    0.42    0.57
   8  -6   1    0.84    0.42
  -8  -6  -1    0.79    0.46
  -8  -6  -1    0.82    0.46
  -8  -6  -1    0.68    0.37
  -8  -6  -1    0.93    0.15
  -8  -6  -1    0.89    0.20
  -8  -6  -1    0.35    0.32
   8  -6   1    0.61    0.32
  -8  -6  -1    0.90    0.21
  -8  -6  -1    1.20    0.32
   8  -6   1    0.98    0.41
  -8  -6  -1    0.87    0.15
   8  -6   1    0.36    0.38
   8  -6   1    1.52    0.59
  -8   6  -1    1.12    0.41
  -8   6  -1    0.79    0.34
  -8   6  -1    0.86    0.40
  -8   6  -1    0.35    0.35
  -8   6  -1    0.49    0.47
  -8   6  -1    1.49    0.37
  -8   6  -1    1.28    0.21
  -8   6  -1    1.17    0.28
  -8   6  -1    1.15    0.41
  -8   6  -1    0.59    0.49
  -8   6  -1    1.02    0.50
   9  -6   1    0.37    0.38
   9  -6   1    0.20    0.40
  -9  -6  -1    0.32    0.46
  -9  -6  -1    0.12    0.47
  -9  -6  -1    0.25    0.33
   9  -6   1   -0.49    0.66
   9  -6   1   -0.04    0.43
  -9  -6  -1    0.20    0.44
  -9  -6  -1   -0.46    0.36
  -9  -6  -1    0.51    0.44
  -9  -6  -1    0.29    0.19
  -9  -6  -1    0.40    0.26
  -9  -6  -1    0.42    0.48
  -9  -6  -1    0.47    0.25
   9  -6   1    0.40    0.69
   9  -6   1    0.15    0.44
   9  -6   1   -0.14    0.50
   9  -6   1   -1.03    0.67
   9  -6   1   -0.44    0.42
  -9  -6  -1    0.35    0.19
  -9   6  -1   -0.12    0.47
  -9   6  -1    0.07    0.36
  -9   6  -1    0.36    0.31
  -9   6  -1    1.11    0.63
  -9   6  -1    0.66    0.49
  -9   6  -1   -0.52    0.61
  -9   6  -1    0.16    0.54
  -9   6  -1    0.79    0.39
  -9   6  -1    0.04    0.42
  -9   6  -1   -0.34    0.59
  -9   6  -1    0.53    0.23
 -10  -6  -1    1.28    0.50
  10  -6   1    1.34    0.56
  10  -6   1    0.26    0.50
 -10  -6  -1    1.21    0.31
 -10  -6  -1    0.57    0.54
 -10  -6  -1    1.54    0.52
  10  -6   1   -0.67    0.76
 -10  -6  -1    0.67    0.43
  10  -6   1    1.31    0.57
 -10  -6  -1    1.59    0.53
  10  -6   1    0.95    0.55
 -10  -6  -1    0.95    0.24
 -10  -6  -1    0.59    0.32
  10  -6   1    1.02    0.55
 -10  -6  -1    0.31    0.37
  10  -6   1    0.32    0.75
  10  -6   1    0.40    0.48
  10  -6   1    1.19    0.45
 -10  -6  -1    1.20    0.25
 -10  -6  -1    1.50    0.53
 -10   6  -1    0.64    0.43
 -10   6  -1    0.26    0.56
 -10   6  -1    1.21    0.64
 -10   6  -1    1.18    0.45
 -10   6  -1   -0.04    0.55
 -10   6  -1    1.13    0.47
 -10   6  -1    0.48    0.64
 -10   6  -1    1.09    0.55
 -10   6  -1    1.42    0.61
 -10   6  -1    0.77    0.28
 -10   6  -1    1.25    0.38
  11  -6   1    0.16    0.63
  11  -6   1    0.79    0.57
  11  -6   1    0.28    0.56
  11  -6   1    0.76    0.56
  11  -6   1    0.13    0.54
 -11  -6  -1    0.72    0.41
 -11  -6  -1    0.45    0.46
 -11  -6  -1    0.71    0.61
 -11  -6  -1    0.46    0.52
 -11  -6  -1    0.31    0.31
  11  -6   1   -0.19    0.51
  11  -6   1    0.67    0.54
 -11  -6  -1    0.67    0.58
 -11  -6  -1    0.25    0.55
  11  -6   1    0.77    1.02
  11  -6   1   -0.22    0.98
 -11  -6  -1    0.08    0.60
 -11  -6  -1    0.50    0.30
 -11  -6  -1   -0.24    0.55
 -11   6  -1   -0.19    0.54
 -11   6  -1   -0.64    0.73
 -11   6  -1    0.45    0.43
 -11   6  -1    0.53    0.51
 -11   6  -1    0.44    0.56
 -11   6  -1    0.16    0.31
 -11   6  -1    1.01    0.64
 -11   6  -1   -0.12    0.73
 -11   6  -1    0.25    0.48
 -11   6  -1    0.06    0.64
 -11   6  -1   -0.16    0.66
 -12  -6  -1    0.13    0.43
  12  -6   1    0.57    0.64
 -12  -6  -1    0.03    0.70
  12  -6   1    0.40    1.03
 -12  -6  -1    0.95    0.65
 -12  -6  -1   -0.25    0.62
  12  -6   1   -0.47    0.74
  12  -6   1   -0.21    1.05
  12  -6   1   -0.46    0.58
  12  -6   1   -0.62    0.72
 -12  -6  -1    0.18    0.37
 -12  -6  -1   -0.48    0.57
 -12  -6  -1    0.13    0.36
 -12  -6  -1   -0.25    0.66
 -12  -6  -1   -0.22    0.56
  12  -6   1    0.11    0.71
 -12  -6  -1   -0.14    0.56
  12  -6   1    0.24    0.58
  12  -6   1   -0.52    0.67
 -12   6  -1    0.40    0.62
 -12   6  -1   -0.34    0.50
 -12   6  -1    0.22    0.83
 -12   6  -1   -0.03    0.70
 -12   6  -1    0.19    0.38
 -12   6  -1    0.43    0.54
 -12   6  -1    0.02    0.64
 -12   6  -1   -0.04    0.74
 -12   6  -1    0.03    0.74
 -12   6  -1    0.06    0.73
 -12   6  -1    0.11    0.84
 -13  -6  -1    0.63    0.47
 -13  -6  -1    1.00    0.68
 -13  -6  -1    0.74    0.72
  13  -6   1    1.06    1.37
 -13  -6  -1    0.70    0.69
 -13  -6  -1    1.47    0.47
 -13  -6  -1    1.30    0.82
  13  -6   1    0.91    0.81
 -13  -6  -1    1.66    0.79
  13  -6   1    1.52    1.24
 -13  -6  -1    1.37    0.52
 -13  -6  -1    1.06    0.89
  13  -6   1    1.25    1.35
  13  -6   1    1.83    0.71
 -13  -6  -1    2.22    0.65
  13  -6   1    0.82    0.77
  13  -6   1    1.27    0.78
  13  -6   1    1.61    0.72
  13  -6   1    1.22    0.81
 -13   6  -1    0.85    0.71
 -13   6  -1    0.85    0.62
 -13   6  -1    1.64    1.40
 -13   6  -1    0.47    0.88
 -13   6  -1    1.11    0.46
 -13   6  -1    1.83    0.83
 -13   6  -1    1.11    0.61
 -13   6  -1    1.33    0.90
 -12  -7   1    5.94    0.89
 -12  -7   1    4.11    0.77
  12  -7  -1    2.23    1.20
 -12  -7   1    4.95    0.70
 -12  -7   1    5.89    0.81
 -12  -7   1    4.32    0.73
  12  -7  -1    3.63    0.91
 -12  -7   1    2.83    0.55
  12  -7  -1    2.53    1.16
  12  -7  -1    5.09    0.94
 -12  -7   1    4.73    0.50
 -12  -7   1    3.75    0.78
 -12  -7   1    5.81    0.51
  12  -7  -1    3.07    1.06
  12  -7  -1    4.42    0.87
  12  -7  -1    4.13    0.71
  12  -7  -1    4.42    0.80
 -12  -7   1    5.01    0.60
 -12  -7   1    4.73    0.61
  12  -7  -1    4.93    0.78
 -12   7   1    3.53    0.98
 -12   7   1    3.59    0.97
 -12   7   1    5.96    0.86
 -12   7   1    4.40    0.55
 -12   7   1    4.58    1.02
 -12   7   1    5.70    0.65
 -12   7   1    4.01    0.95
 -12   7   1    5.05    0.76
 -12   7   1    3.05    0.99
 -12   7   1    4.61    0.94
  11  -7  -1    2.10    0.73
  11  -7  -1    2.42    0.67
  11  -7  -1    2.37    1.03
 -11  -7   1    2.75    0.48
  11  -7  -1    2.41    0.74
 -11  -7   1    2.00    0.68
  11  -7  -1    2.71    0.58
  11  -7  -1    1.77    1.04
  11  -7  -1    1.92    0.67
 -11  -7   1    2.40    0.47
 -11  -7   1    2.16    0.62
 -11  -7   1    2.53    0.32
 -11  -7   1    2.36    0.64
 -11  -7   1    2.32    0.61
 -11  -7   1    1.93    0.60
 -11  -7   1    1.95    0.45
 -11  -7   1    2.02    0.32
  11  -7  -1    2.35    0.75
  11  -7  -1    2.03    0.67
 -11   7   1    1.87    0.40
 -11   7   1    1.26    0.89
 -11   7   1    1.96    0.35
 -11   7   1    3.53    0.95
 -11   7   1    1.45    0.97
 -11   7   1    1.86    0.73
 -11   7   1    2.08    0.57
 -11   7   1    1.40    0.62
 -11   7   1    2.16    0.74
 -11   7   1    1.01    0.65
 -10  -7   1    1.86    0.52
  10  -7  -1    2.74    0.65
  10  -7  -1    1.53    0.54
  10  -7  -1    1.44    0.63
 -10  -7   1    2.55    0.62
 -10  -7   1    1.73    0.56
  10  -7  -1    1.84    0.86
  10  -7  -1    0.83    0.68
  10  -7  -1    2.61    0.61
  10  -7  -1    1.04    0.88
 -10  -7   1    1.61    0.54
  10  -7  -1    1.10    0.62
 -10  -7   1    2.27    0.62
 -10  -7   1    2.11    0.60
 -10  -7   1    1.81    0.38
 -10  -7   1    1.83    0.27
 -10  -7   1    2.18    0.43
 -10  -7   1    2.05    0.39
 -10  -7   1    2.12    0.27
  10  -7  -1    1.95    0.50
 -10   7   1    1.43    0.55
 -10   7   1    3.12    0.65
 -10   7   1    1.99    0.60
 -10   7   1    1.85    0.64
 -10   7   1    2.31    0.29
 -10   7   1    2.08    0.74
 -10   7   1    2.29    0.71
 -10   7   1    1.95    0.50
 -10   7   1    2.09    0.52
 -10   7   1    1.81    0.33
 -10   7   1    2.60    0.73
   9  -7  -1    0.12    0.43
   9  -7  -1    0.43    0.44
   9  -7  -1    0.75    0.49
  -9  -7   1    0.64    0.50
  -9  -7   1    0.36    0.21
  -9  -7   1    0.52    0.30
  -9  -7   1    0.84    0.57
   9  -7  -1    0.73    0.83
   9  -7  -1    0.82    0.85
  -9  -7   1   -0.01    0.61
  -9  -7   1   -0.12    0.37
   9  -7  -1    0.15    0.48
  -9  -7   1   -0.14    0.50
  -9  -7   1   -0.02    0.43
   9  -7  -1    0.66    0.62
  -9  -7   1    0.23    0.21
  -9  -7   1    0.22    0.44
  -9  -7   1    0.21    0.30
   9  -7  -1    0.60    0.51
   9  -7  -1    0.31    0.46
  -9   7   1    0.10    0.63
  -9   7   1    0.27    0.54
  -9   7   1    0.31    0.63
  -9   7   1   -0.44    0.52
  -9   7   1    0.54    0.45
  -9   7   1    0.42    0.43
  -9   7   1    0.19    0.40
  -9   7   1    0.81    0.62
  -9   7   1    0.16    0.50
  -9   7   1    0.13    0.20
  -9   7   1    0.19    0.24
   8  -7  -1    2.60    0.65
   8  -7  -1    4.22    0.53
  -8  -7   1    4.40    0.53
   8  -7  -1    3.76    0.73
  -8  -7   1    4.55    0.62
   8  -7  -1    4.25    0.53
   8  -7  -1    3.14    0.74
   8  -7  -1    3.15    0.55
  -8  -7   1    3.65    0.48
   8  -7  -1    3.39    0.45
  -8  -7   1    3.68    0.29
  -8  -7   1    3.71    0.29
  -8  -7   1    3.06    0.42
  -8  -7   1    4.67    0.60
   8  -7  -1    3.29    0.46
  -8  -7   1    4.26    0.37
   8  -7  -1    3.46    0.53
  -8  -7   1    3.23    0.52
  -8  -7   1    4.39    0.54
  -8  -7   1    4.57    0.61
  -8  -7   1    3.92    0.38
  -8   7   1    2.47    0.43
  -8   7   1    5.85    0.79
  -8   7   1    3.16    0.83
  -8   7   1    4.41    0.57
  -8   7   1    3.13    0.63
  -8   7   1    2.39    0.63
  -8   7   1    3.88    0.62
  -8   7   1    3.52    0.29
  -8   7   1    4.27    0.84
  -8   7   1    3.65    0.32
  -8   7   1    4.74    0.56
  -7  -7   1    4.27    0.56
  -7  -7   1    4.48    0.32
  -7  -7   1    4.66    0.32
  -7  -7   1    4.39    0.37
  -7  -7   1    4.56    0.65
   7  -7  -1    3.20    0.64
   7  -7  -1    4.41    0.55
   7  -7  -1    4.72    0.68
  -7  -7   1    4.44    0.38
   7  -7  -1    3.41    0.50
   7  -7  -1    5.05    0.59
  -7  -7   1    4.82    0.55
  -7  -7   1    5.27    0.55
   7  -7  -1    4.43    0.55
  -7  -7   1    4.49    0.49
  -7  -7   1    5.40    0.58
   7  -7  -1    2.92    0.65
  -7  -7   1    4.89    0.45
   7  -7  -1    4.55    0.55
  -7   7   1    4.59    0.65
  -7   7   1    3.80    0.58
  -7   7   1    4.45    0.29
  -7   7   1    4.21    0.52
  -7   7   1    4.68    0.53
  -7   7   1    4.12    0.58
  -7   7   1    4.35    0.31
  -7   7   1    4.27    0.52
  -7   7   1    5.95    0.73
  -7   7   1    3.70    0.59
  -7   7   1    4.67    0.56
  -6  -7   1   10.28    0.75
  -6  -7   1    9.50    0.82
   6  -7  -1    9.21    0.73
   6  -7  -1    9.30    0.86
  -6  -7   1    9.73    0.60
  -6  -7   1    9.94    0.76
   6  -7  -1   11.31    0.77
   6  -7  -1   10.11    0.74
  -6  -7   1    9.59    0.68
   6  -7  -1    9.46    0.78
  -6  -7   1   10.66    0.67
  -6  -7   1   10.22    0.61
  -6  -7   1   10.17    0.72
  -6  -7   1   10.62    0.72
  -6  -7   1    9.70    0.61
  -6  -7   1   10.07    0.60
   6  -7  -1    8.88    0.87
   6  -7  -1   10.20    0.88
   6  -7  -1    9.82    0.72
   6  -7  -1   10.25    0.75
  -6  -7   1    9.07    0.81
  -6   7   1   11.48    0.76
  -6   7   1    8.68    0.73
  -6   7   1   10.44    0.90
  -6   7   1   10.42    0.74
  -6   7   1   10.52    0.85
  -6   7   1    9.95    0.72
  -6   7   1    9.85    0.77
  -6   7   1    8.89    0.83
   5  -7  -1    0.24    0.47
  -5  -7   1    0.29    0.17
   5  -7  -1    0.60    0.34
   5  -7  -1    0.39    0.30
  -5  -7   1    0.64    0.29
   5  -7  -1    0.98    0.46
  -5  -7   1    0.55    0.24
   5  -7  -1    0.41    0.29
  -5  -7   1    0.66    0.17
  -5  -7   1    0.64    0.17
  -5  -7   1    0.52    0.27
   5  -7  -1   -0.20    0.43
  -5  -7   1    0.39    0.21
  -5  -7   1    0.36    0.32
   5  -7  -1    0.09    0.30
   5  -7  -1    0.02    0.26
   5  -7  -1    0.72    0.30
  -5  -7   1    1.17    0.18
  -5  -7   1    0.20    0.38
  -5  -7   1    0.02    0.29
  -5   7   1    0.04    0.26
  -5   7   1    0.70    0.41
  -5   7   1    0.11    0.40
  -5   7   1    0.57    0.34
  -5   7   1    0.62    0.53
  -5   7   1    0.51    0.31
  -5   7   1    0.86    0.36
  -5   7   1    0.07    0.34
  -5   7   1    0.06    0.28
   4  -7  -1    0.85    0.44
  -4  -7   1    0.83    0.27
  -4  -7   1    1.05    0.22
   4  -7  -1    0.68    0.44
   4  -7  -1    1.03    0.45
  -4  -7   1    0.93    0.18
  -4  -7   1    1.01    0.25
   4  -7  -1    1.01    0.29
   4  -7  -1    0.92    0.29
   4  -7  -1    1.20    0.28
   4  -7  -1    0.89    0.29
  -4  -7   1    0.89    0.24
   4  -7  -1    0.53    0.30
  -4  -7   1    0.37    0.33
  -4  -7   1    1.11    0.18
  -4  -7   1    1.38    0.35
   4  -7  -1    0.42    0.24
  -4   7   1    0.44    0.38
  -4   7   1    0.28    0.44
  -4   7   1    1.00    0.26
  -4   7   1    0.58    0.38
  -4   7   1    1.55    0.51
  -4   7   1    0.59    0.32
   3  -7  -1    7.25    0.54
  -3  -7   1    7.66    0.55
   3  -7  -1    6.55    0.56
   3  -7  -1    6.59    0.50
   3  -7  -1    5.82    0.64
  -3  -7   1    6.79    0.47
   3  -7  -1    7.01    0.50
   3  -7  -1    7.01    0.53
  -3  -7   1    6.57    0.45
  -3  -7   1    6.54    0.45
  -3  -7   1    6.16    0.47
  -3  -7   1    7.35    0.50
   3  -7  -1    6.89    0.55
   3  -7  -1    5.93    0.69
  -3  -7   1    7.83    0.60
   3  -7  -1    5.64    0.63
  -3   7   1    6.57    0.52
  -3   7   1    6.48    0.52
  -3   7   1    6.84    0.52
  -3   7   1    6.59    0.57
  -3   7   1    6.39    0.55
  -2  -7   1    0.50    0.24
  -2  -7   1    0.96    0.20
   2  -7  -1    0.66    0.23
  -2  -7   1    0.86    0.23
  -2  -7   1    0.57    0.19
   2  -7  -1    0.79    0.38
   2  -7  -1    1.07    0.26
   2  -7  -1    0.71    0.22
  -2  -7   1    1.09    0.24
  -2  -7   1    1.33    0.32
   2  -7  -1    1.05    0.29
  -2  -7   1    0.87    0.44
   2  -7  -1    0.78    0.48
   2  -7  -1    0.63    0.24
  -2  -7   1    0.76    0.24
  -2  -7   1    1.01    0.21
  -2  -7   1    1.03    0.21
   2  -7  -1    1.14    0.25
   2  -7  -1    0.69    0.38
  -2   7   1    1.02    0.23
  -2   7   1    0.32    0.24
  -2   7   1    1.45    0.32
  -2   7   1    1.73    0.29
   2   7  -1    0.90    0.14
   2   7  -1    0.96    0.15
  -2   7   1    0.85    0.24
   2   7  -1    1.01    0.15
   2   7  -1    1.06    0.14
  -1  -7   1   21.20    1.27
  -1  -7   1   21.61    1.23
  -1  -7   1   21.29    1.27
   1  -7  -1   22.05    1.30
   1  -7  -1   21.51    1.26
   1  -7  -1   22.44    1.30
   1  -7  -1   19.93    1.25
  -1  -7   1   18.66    1.37
  -1  -7   1   21.86    1.31
   1  -7  -1   21.25    1.28
  -1  -7   1   20.57    1.27
   1  -7  -1   21.83    1.30
   1  -7  -1   21.98    1.30
   1  -7  -1   20.17    1.38
  -1  -7   1   22.44    1.25
  -1  -7   1   22.28    1.29
   1  -7  -1   21.57    1.28
  -1  -7   1   21.26    1.25
  -1  -7   1   20.98    1.24
  -1   7   1   21.97    1.27
   1   7  -1   21.96    1.26
   1   7  -1   21.87    1.33
   1   7  -1   21.70    1.24
   1   7  -1   21.98    1.24
   1   7  -1   21.04    1.28
  -1   7   1   21.57    1.26
  -1   7   1   21.76    1.29
  -1   7   1   21.91    1.26
  -1   7   1   21.95    1.26
   1   7  -1   21.33    1.24
   1   7  -1   21.30    1.24
  -1   7   1   21.05    1.31
  -1   7   1   20.95    1.26
   0  -7  -1   11.42    0.67
   0  -7  -1    8.82    0.66
   0  -7   1    9.35    0.61
   0  -7  -1   10.21    0.62
   0  -7   1   10.06    0.63
   0  -7  -1    9.65    0.66
   0  -7   1    9.44    0.66
   0  -7  -1    9.09    0.54
   0  -7  -1    8.33    0.66
   0  -7  -1    9.20    0.60
   0  -7   1    7.88    0.78
   0  -7  -1    9.70    0.64
   0  -7  -1    9.01    0.55
   0  -7   1    9.45    0.60
   0  -7   1   10.55    0.61
   0  -7   1    9.52    0.68
   0  -7   1    8.82    0.55
   0  -7   1    9.01    0.67
   0  -7  -1    9.53    0.60
   0  -7   1    8.92    0.67
   0  -7  -1    7.75    0.78
   0   7  -1    9.55    0.60
   0   7  -1    9.08    0.64
   0   7  -1    9.55    0.60
   0   7   1    8.56    0.69
   0   7   1    9.38    0.66
   0   7   1    9.96    0.62
   0   7   1    9.53    0.59
   0   7   1    9.49    0.58
   0   7  -1    9.27    0.59
   0   7  -1    9.73    0.60
   0   7  -1    9.19    0.66
   0   7  -1    9.51    0.70
   0   7  -1    8.02    0.59
  -1  -7  -1    6.88    0.54
   1  -7   1    7.40    0.53
  -1  -7  -1    5.84    0.50
  -1  -7  -1    6.20    0.49
   1  -7   1    6.80    0.47
  -1  -7  -1    6.27    0.42
  -1  -7  -1    6.23    0.49
   1  -7   1    5.48    0.52
  -1  -7  -1    6.28    0.44
   1  -7   1    6.69    0.70
   1  -7   1    7.22    0.55
   1  -7   1    7.10    0.50
  -1  -7  -1    5.74    0.41
   1  -7   1    6.05    0.47
  -1  -7  -1    5.92    0.53
   1  -7   1    5.72    0.52
   1  -7   1    6.29    0.48
  -1  -7  -1    5.90    0.69
  -1  -7  -1    6.96    0.48
   1  -7   1    6.16    0.37
  -1  -7  -1    6.72    0.44
  -1   7  -1    6.28    0.49
   1   7   1    6.67    0.41
  -1   7  -1    6.41    0.47
   1   7   1    6.20    0.41
  -1   7  -1    7.23    0.58
   1   7   1    6.91    0.42
  -1   7  -1    6.13    0.48
  -1   7  -1    6.68    0.48
  -1   7  -1    6.95    0.54
   1   7   1    6.08    0.41
   1   7   1    7.36    0.56
  -1   7  -1    6.81    0.52
  -1   7  -1    7.17    0.49
   2  -7   1    3.75    0.48
  -2  -7  -1    4.73    0.42
  -2  -7  -1    4.92    0.40
   2  -7   1    5.06    0.48
   2  -7   1    4.80    0.41
   2  -7   1    3.87    0.39
   2  -7   1    4.55    0.62
  -2  -7  -1    4.59    0.34
  -2  -7  -1    5.31    0.34
  -2  -7  -1    5.78    0.48
  -2  -7  -1    5.39    0.40
   2  -7   1    4.68    0.46
  -2  -7  -1    4.90    0.47
  -2  -7  -1    5.07    0.40
   2  -7   1    4.30    0.48
   2  -7   1    4.04    0.39
   2  -7   1    4.03    0.42
  -2  -7  -1    4.44    0.45
  -2  -7  -1    4.30    0.33
  -2  -7  -1    3.69    0.57
  -2   7  -1    4.05    0.50
  -2   7  -1    5.02    0.41
  -2   7  -1    4.66    0.42
  -2   7  -1    4.15    0.45
  -2   7  -1    4.40    0.45
  -2   7  -1    5.17    0.39
  -2   7  -1    4.55    0.41
  -2   7  -1    3.68    0.41
  -3  -7  -1    7.11    0.76
   3  -7   1    8.29    0.61
  -3  -7  -1    8.06    0.57
  -3  -7  -1    8.19    0.50
   3  -7   1    7.28    0.77
  -3  -7  -1    8.20    0.65
   3  -7   1    9.23    0.65
   3  -7   1    8.68    0.61
   3  -7   1    9.40    0.67
  -3  -7  -1    7.79    0.56
  -3  -7  -1    7.60    0.54
  -3  -7  -1    8.53    0.54
   3  -7   1    8.34    0.66
  -3  -7  -1    9.00    0.59
   3  -7   1    7.98    0.60
  -3  -7  -1    8.41    0.51
  -3  -7  -1    7.59    0.61
   3  -7   1    8.13    0.59
  -3   7  -1    8.21    0.62
  -3   7  -1    8.73    0.63
  -3   7  -1    8.00    0.58
  -3   7  -1    8.57    0.63
  -3   7  -1    8.55    0.66
  -3   7  -1    7.80    0.62
  -4  -7  -1   17.96    1.08
   4  -7   1   15.08    1.02
  -4  -7  -1   16.61    0.94
  -4  -7  -1   16.23    0.96
   4  -7   1   17.52    1.05
   4  -7   1   16.65    1.13
  -4  -7  -1   16.25    0.96
   4  -7   1   17.91    1.05
  -4  -7  -1   17.00    0.94
   4  -7   1   14.77    1.15
   4  -7   1   17.06    1.06
  -4  -7  -1   17.28    1.01
   4  -7   1   17.45    1.02
  -4  -7  -1   15.54    1.15
  -4  -7  -1   16.47    1.02
  -4  -7  -1   16.91    1.04
  -4  -7  -1   18.18    1.02
   4  -7   1   16.27    1.13
   4  -7   1   16.64    1.03
  -4   7  -1   16.08    1.01
  -4   7  -1   15.24    1.02
  -4   7  -1   14.53    1.03
  -4   7  -1   16.82    1.05
  -4   7  -1   16.72    1.02
  -4   7  -1   15.81    1.07
  -4   7  -1   14.99    1.04
  -4   7  -1   15.38    1.03
   5  -7   1    2.44    0.51
   5  -7   1    1.90    0.34
  -5  -7  -1    1.26    0.56
   5  -7   1    1.83    0.35
  -5  -7  -1    1.45    0.32
  -5  -7  -1    1.42    0.32
  -5  -7  -1    1.87    0.29
   5  -7   1    1.24    0.48
   5  -7   1    1.79    0.49
   5  -7   1    2.46    0.41
  -5  -7  -1    1.72    0.40
   5  -7   1    0.71    0.33
  -5  -7  -1    1.90    0.28
  -5  -7  -1    1.38    0.36
   5  -7   1    1.57    0.31
   5  -7   1    1.39    0.32
  -5   7  -1    1.89    0.31
  -5   7  -1    1.73    0.36
  -5   7  -1    1.83    0.36
  -5   7  -1    2.19    0.40
  -5   7  -1    1.67    0.40
  -5   7  -1    1.82    0.41
  -5   7  -1    2.05    0.31
  -5   7  -1    2.32    0.46
   6  -7   1    0.68    0.54
   6  -7   1    0.83    0.52
  -6  -7  -1    1.12    0.33
   6  -7   1    0.14    0.55
   6  -7   1    1.03    0.35
  -6  -7  -1    0.80    0.38
  -6  -7  -1    0.72    0.44
  -6  -7  -1    0.76    0.28
  -6  -7  -1    1.72    0.59
  -6  -7  -1    0.98    0.35
   6  -7   1    0.70    0.35
  -6  -7  -1    0.70    0.41
   6  -7   1    1.42    0.46
  -6  -7  -1    0.81    0.33
  -6  -7  -1    0.65    0.28
   6  -7   1    1.09    0.37
  -6   7  -1    2.16    0.43
  -6   7  -1    1.27    0.36
  -6   7  -1    1.30    0.15
  -6   7  -1    0.92    0.31
  -6   7  -1    0.63    0.32
  -6   7  -1    0.59    0.41
  -6   7  -1    1.17    0.55
  -6   7  -1    1.21    0.16
  -7  -7  -1    1.35    0.43
   7  -7   1    1.71    0.59
  -7  -7  -1    0.82    0.53
  -7  -7  -1    0.91    0.36
   7  -7   1    1.13    0.40
  -7  -7  -1    1.83    0.41
   7  -7   1    2.16    0.41
   7  -7   1    0.19    0.59
   7  -7   1    1.06    0.43
  -7  -7  -1    1.19    0.46
   7  -7   1    1.56    0.41
  -7  -7  -1    1.32    0.35
   7  -7   1    1.20    0.55
  -7  -7  -1    1.27    0.39
  -7  -7  -1    1.89    0.50
   7  -7   1    1.67    0.38
   7  -7   1    1.13    0.40
  -7   7  -1    1.05    0.43
  -7   7  -1    1.05    0.39
  -7   7  -1    1.41    0.17
  -7   7  -1    0.97    0.43
  -7   7  -1    0.92    0.36
  -7   7  -1    1.31    0.21
  -7   7  -1    1.54    0.41
  -7   7  -1    1.52    0.36
  -8  -7  -1   13.99    1.01
  -8  -7  -1   12.96    1.02
  -8  -7  -1   12.41    1.08
   8  -7   1   13.29    0.99
   8  -7   1   12.68    1.23
  -8  -7  -1   14.40    0.95
  -8  -7  -1   14.14    1.03
  -8  -7  -1   13.33    0.96
   8  -7   1   15.07    1.17
   8  -7   1   13.89    1.00
   8  -7   1   14.46    1.00
   8  -7   1   14.31    1.16
  -8  -7  -1   13.78    1.13
   8  -7   1   14.10    1.02
   8  -7   1   14.52    1.02
   8  -7   1   13.56    1.10
  -8   7  -1   13.97    1.03
  -8   7  -1   13.16    0.99
  -8   7  -1   12.99    1.05
  -8   7  -1   15.34    0.99
  -8   7  -1   13.74    1.01
  -8   7  -1   13.81    0.82
  -8   7  -1   13.65    0.98
   9  -7   1   12.38    1.08
   9  -7   1   13.52    1.05
   9  -7   1   14.23    1.01
   9  -7   1   14.95    1.07
  -9  -7  -1   13.57    1.14
  -9  -7  -1   12.86    0.98
   9  -7   1   14.85    1.35
   9  -7   1   11.90    1.03
   9  -7   1   11.96    1.08
  -9  -7  -1   13.75    1.36
  -9  -7  -1   13.78    1.21
  -9  -7  -1   11.48    1.03
  -9  -7  -1   13.17    0.93
   9  -7   1    9.48    1.20
  -9  -7  -1   14.70    1.10
  -9   7  -1   13.24    1.02
  -9   7  -1   14.15    1.04
  -9   7  -1   12.22    0.98
  -9   7  -1   12.95    1.08
  -9   7  -1   13.35    0.98
  -9   7  -1   12.48    0.85
  -9   7  -1   12.60    0.80
 -10  -7  -1    0.11    0.18
  10  -7   1    0.16    1.00
 -10  -7  -1    0.52    0.64
 -10  -7  -1   -0.27    0.52
  10  -7   1    0.06    0.56
 -10  -7  -1   -0.45    0.43
 -10  -7  -1   -0.22    0.55
 -10  -7  -1    0.23    0.18
 -10  -7  -1    0.24    0.61
 -10  -7  -1   -0.03    0.56
  10  -7   1   -0.08    0.57
  10  -7   1    0.36    0.90
  10  -7   1   -0.34    0.52
  10  -7   1   -0.36    0.90
  10  -7   1    0.84    0.66
  10  -7   1   -0.56    0.51
 -10  -7  -1   -0.27    0.44
 -10  -7  -1    0.29    0.57
  10  -7   1    0.52    0.56
 -10   7  -1   -0.42    0.49
 -10   7  -1   -0.02    0.62
 -10   7  -1    0.00    0.48
 -10   7  -1    0.33    0.48
 -10   7  -1   -0.07    0.55
 -10   7  -1   -0.23    0.60
 -10   7  -1    0.66    0.36
 -10   7  -1    0.15    0.27
 -11  -7  -1    1.90    0.51
  11  -7   1    1.34    0.61
  11  -7   1    1.58    0.58
 -11  -7  -1    1.24    0.65
 -11  -7  -1    2.16    0.59
  11  -7   1    1.23    0.66
 -11  -7  -1    1.63    0.59
 -11  -7  -1    1.16    0.58
  11  -7   1    2.31    1.15
 -11  -7  -1    1.98    0.27
  11  -7   1    0.88    0.72
  11  -7   1    2.46    0.74
 -11  -7  -1    2.06    0.65
  11  -7   1    2.33    1.18
  11  -7   1    1.26    0.70
 -11  -7  -1    1.89    0.27
 -11  -7  -1    1.92    0.67
  11  -7   1    0.90    0.68
 -11  -7  -1    2.45    0.75
 -11   7  -1    1.74    0.74
 -11   7  -1    0.86    0.66
 -11   7  -1    0.65    0.56
 -11   7  -1    2.10    0.93
 -11   7  -1    1.85    0.35
 -11   7  -1    1.90    0.65
 -11   7  -1    2.27    0.45
 -11   7  -1    2.47    0.74
  12  -7   1    0.82    0.73
  12  -7   1    1.41    0.72
  12  -7   1    0.98    0.69
  12  -7   1    1.89    0.78
 -12  -7  -1    1.49    0.78
 -12  -7  -1    1.04    0.73
  12  -7   1    0.49    0.82
 -12  -7  -1    1.20    0.34
 -12  -7  -1    2.34    0.72
  12  -7   1    3.07    1.25
  12  -7   1    1.70    0.79
  12  -7   1    0.91    0.75
 -12  -7  -1    1.24    0.64
 -12  -7  -1    2.04    0.57
 -12  -7  -1    1.21    0.33
 -12  -7  -1    1.46    0.77
  12  -7   1    1.14    1.20
 -12  -7  -1    1.09    0.79
 -12  -7  -1    1.96    0.68
 -12   7  -1    2.35    0.86
 -12   7  -1    1.08    0.84
 -12   7  -1    1.86    0.64
 -12   7  -1    1.17    0.68
 -12   7  -1    1.57    0.78
 -12   7  -1    1.14    0.40
 -12   7  -1    1.80    0.52
 -12   7  -1    1.29    0.80
  12  -8  -1    6.50    1.45
 -12  -8   1    5.33    0.89
 -12  -8   1    4.57    0.52
  12  -8  -1    4.30    1.45
 -12  -8   1    3.33    0.87
 -12  -8   1    4.58    0.51
  12  -8  -1    4.29    0.90
  12  -8  -1    2.76    0.95
 -12  -8   1    4.84    0.43
 -12  -8   1    4.47    0.44
 -12  -8   1    4.47    0.86
 -12  -8   1    3.95    0.81
  12  -8  -1    3.85    0.81
  12  -8  -1    4.13    0.81
 -12  -8   1    3.57    0.62
  12  -8  -1    3.32    1.38
  12  -8  -1    3.09    1.01
  12  -8  -1    2.41    1.41
 -12  -8   1    3.31    0.78
 -12  -8   1    5.39    0.95
 -12   8   1    4.14    0.94
 -12   8   1    3.91    0.52
 -12   8   1    4.81    1.09
 -12   8   1    3.54    0.51
 -12   8   1    4.48    1.12
 -12   8   1    3.48    1.07
 -12   8   1    2.72    1.10
 -12   8   1    4.45    1.13
 -12   8   1    5.57    1.01
 -12   8   1    3.83    0.80
  11  -8  -1    3.29    0.81
 -11  -8   1    2.33    0.73
 -11  -8   1    2.54    0.88
  11  -8  -1    2.12    0.83
 -11  -8   1    1.57    0.66
 -11  -8   1    2.99    0.56
  11  -8  -1    3.18    0.68
  11  -8  -1    2.72    0.85
  11  -8  -1    2.10    0.67
  11  -8  -1    3.01    0.91
 -11  -8   1    3.58    0.34
 -11  -8   1    3.09    0.79
 -11  -8   1    3.52    0.91
  11  -8  -1    3.00    0.86
 -11  -8   1    3.47    1.12
 -11  -8   1    2.72    0.33
  11  -8  -1    1.04    1.21
  11  -8  -1    0.25    1.17
 -11  -8   1    4.77    0.80
 -11   8   1    3.32    0.68
 -11   8   1    2.82    1.04
 -11   8   1    2.96    0.35
 -11   8   1    3.24    0.40
 -11   8   1    2.44    0.86
 -11   8   1    2.19    1.01
 -11   8   1    2.11    1.04
 -11   8   1    1.80    0.67
 -11   8   1    3.02    0.86
 -11   8   1    3.65    0.86
  10  -8  -1    1.87    0.59
  10  -8  -1    2.64    0.68
 -10  -8   1    2.30    0.46
  10  -8  -1    1.18    1.02
  10  -8  -1    1.02    0.71
 -10  -8   1    2.83    0.55
 -10  -8   1    2.39    0.49
 -10  -8   1    2.75    0.56
 -10  -8   1    2.95    0.63
  10  -8  -1    1.63    0.83
 -10  -8   1    1.91    0.24
 -10  -8   1    2.74    0.68
  10  -8  -1    2.15    0.73
 -10  -8   1    3.49    0.79
 -10  -8   1    2.24    0.24
 -10  -8   1    2.08    0.67
  10  -8  -1    3.14    0.63
 -10  -8   1    1.82    0.62
 -10  -8   1    1.25    0.60
  10  -8  -1    2.56    1.01
  10  -8  -1    1.69    0.72
 -10  -8   1    3.74    0.77
 -10   8   1    1.85    0.56
 -10   8   1    2.63    0.54
 -10   8   1    1.57    0.82
 -10   8   1    1.52    0.78
 -10   8   1    1.92    0.62
 -10   8   1    2.25    0.80
 -10   8   1    2.57    0.95
 -10   8   1    1.29    0.82
 -10   8   1    1.58    0.55
 -10   8   1    1.67    0.26
  -9  -8   1   34.42    2.06
   9  -8  -1   35.35    2.28
   9  -8  -1   36.87    2.25
  -9  -8   1   36.45    2.17
  -9  -8   1   33.33    2.22
   9  -8  -1   38.65    2.43
   9  -8  -1   38.30    2.22
  -9  -8   1   37.98    2.30
  -9  -8   1   37.13    2.15
  -9  -8   1   35.87    2.27
  -9  -8   1   35.61    2.08
  -9  -8   1   37.38    2.24
  -9  -8   1   35.26    2.08
  -9  -8   1   37.79    2.31
   9  -8  -1   36.82    2.46
  -9  -8   1   35.45    2.06
  -9  -8   1   33.22    2.21
   9  -8  -1   32.96    2.43
   9  -8  -1   38.55    2.21
  -9  -8   1   37.50    2.24
  -9   8   1   37.56    2.21
  -9   8   1   34.58    2.25
  -9   8   1   36.12    2.35
  -9   8   1   37.49    2.26
  -9   8   1   35.17    2.07
  -9   8   1   36.25    2.06
  -9   8   1   38.95    2.24
  -9   8   1   40.16    2.24
  -8  -8   1    2.25    0.50
   8  -8  -1    0.84    0.68
  -8  -8   1    1.31    0.58
   8  -8  -1    1.56    0.86
  -8  -8   1    1.16    0.42
  -8  -8   1    1.24    0.26
   8  -8  -1    2.01    0.57
   8  -8  -1    1.57    0.52
  -8  -8   1    1.74    0.28
  -8  -8   1    1.55    0.55
   8  -8  -1    1.42    0.48
  -8  -8   1    1.27    0.36
  -8  -8   1    1.38    0.52
   8  -8  -1    1.29    0.88
  -8  -8   1    1.73    0.49
  -8  -8   1    1.30    0.36
   8  -8  -1    1.56    0.55
   8  -8  -1    0.74    0.51
   8  -8  -1    1.54    0.50
  -8  -8   1    1.34    0.64
  -8   8   1    1.72    0.44
  -8   8   1    1.69    0.62
  -8   8   1    1.58    0.49
  -8   8   1    1.11    0.54
  -8   8   1    0.50    0.77
  -8   8   1    2.57    0.57
  -8   8   1    1.59    0.62
  -8   8   1    2.19    0.56
   7  -8  -1    0.96    0.67
   7  -8  -1    1.23    0.68
  -7  -8   1    2.37    0.36
  -7  -8   1    2.76    0.46
  -7  -8   1    2.60    0.28
   7  -8  -1    2.60    0.53
   7  -8  -1    0.77    0.69
   7  -8  -1    2.28    0.53
   7  -8  -1    2.39    0.45
  -7  -8   1    2.55    0.58
  -7  -8   1    3.34    0.58
  -7  -8   1    2.95    0.43
   7  -8  -1    3.10    0.43
   7  -8  -1    3.07    0.49
  -7  -8   1    2.64    0.36
  -7  -8   1    1.58    0.42
  -7  -8   1    1.46    0.46
   7  -8  -1    2.21    0.53
  -7  -8   1    2.26    0.27
  -7   8   1    2.01    0.40
  -7   8   1    1.94    0.64
  -7   8   1    2.93    0.55
  -7   8   1    2.46    0.48
  -7   8   1    2.83    0.57
  -7   8   1    3.63    0.58
  -7   8   1    3.16    0.77
  -7   8   1    1.96    0.63
  -6  -8   1   17.97    1.13
   6  -8  -1   17.53    1.34
   6  -8  -1   18.61    1.19
  -6  -8   1   17.59    1.25
  -6  -8   1   18.07    1.18
   6  -8  -1   19.41    1.17
   6  -8  -1   16.77    1.22
  -6  -8   1   16.07    1.15
   6  -8  -1   16.59    1.29
   6  -8  -1   15.51    1.27
  -6  -8   1   17.29    1.15
   6  -8  -1   18.79    1.17
   6  -8  -1   20.10    1.20
   6  -8  -1   17.93    1.18
  -6  -8   1   18.90    1.27
  -6  -8   1   19.51    1.11
  -6  -8   1   17.71    1.06
  -6  -8   1   18.18    1.06
  -6  -8   1   16.83    1.20
  -6   8   1   18.26    1.20
  -6   8   1   19.53    1.17
  -6   8   1   18.64    1.21
  -6   8   1   18.59    1.20
  -6   8   1   17.68    1.20
  -6   8   1   18.07    1.21
  -6   8   1   17.36    1.22
  -5  -8   1   10.82    0.64
  -5  -8   1   11.51    0.80
  -5  -8   1   10.78    0.73
   5  -8  -1    9.77    0.79
   5  -8  -1    9.57    0.79
   5  -8  -1    8.42    0.89
   5  -8  -1    9.57    0.90
  -5  -8   1   10.25    0.72
   5  -8  -1   10.95    0.79
  -5  -8   1   11.22    0.86
  -5  -8   1   10.45    0.65
   5  -8  -1   10.14    0.82
  -5  -8   1    9.97    0.70
  -5  -8   1   10.38    0.81
   5  -8  -1    9.91    0.79
   5  -8  -1    8.53    0.95
  -5  -8   1   10.65    0.77
  -5   8   1   10.02    0.76
  -5   8   1   10.32    0.75
  -5   8   1    9.90    0.75
  -5   8   1   11.02    0.81
  -5   8   1   10.41    0.83
   4  -8  -1   -0.34    0.51
  -4  -8   1    0.50    0.21
   4  -8  -1   -0.75    0.52
  -4  -8   1    0.06    0.26
  -4  -8   1    0.21    0.26
  -4  -8   1    0.32    0.24
  -4  -8   1    0.19    0.21
   4  -8  -1   -0.11    0.31
  -4  -8   1    0.37    0.37
   4  -8  -1   -0.06    0.55
  -4  -8   1    0.43    0.25
  -4  -8   1   -0.15    0.32
   4  -8  -1   -0.05    0.31
   4  -8  -1   -0.23    0.33
   4  -8  -1   -0.48    0.30
  -4  -8   1    0.21    0.25
   4  -8  -1    0.60    0.36
   4  -8  -1   -0.04    0.31
  -4  -8   1    0.11    0.35
  -4   8   1   -0.22    0.34
  -4   8   1    0.01    0.37
  -4   8   1    0.26    0.38
  -4   8   1    0.07    0.27
  -4   8   1    0.35    0.37
   3  -8  -1    0.00    0.31
  -3  -8   1    0.41    0.25
   3  -8  -1    0.00    0.29
  -3  -8   1    0.05    0.37
   3  -8  -1    0.05    0.35
  -3  -8   1   -0.17    0.27
   3  -8  -1   -0.42    0.46
  -3  -8   1    0.04    0.22
   3  -8  -1   -0.32    0.27
   3  -8  -1    0.36    0.27
  -3  -8   1    0.09    0.32
   3  -8  -1    0.00    0.52
  -3  -8   1    0.67    0.23
  -3  -8   1    0.09    0.21
  -3  -8   1   -0.09    0.21
   3  -8  -1   -0.62    0.46
  -3  -8   1    0.31    0.53
  -3  -8   1    0.09    0.27
   3  -8  -1   -0.36    0.27
  -3   8   1    0.11    0.27
  -3   8   1    0.26    0.30
  -3   8   1    0.05    0.31
  -3   8   1   -0.09    0.32
  -3   8   1   -0.45    0.32
  -3   8   1   -0.46    0.33
  -3   8   1    0.05    0.36
   2  -8  -1   19.76    1.50
   2  -8  -1   21.53    1.34
   2  -8  -1   19.40    1.41
  -2  -8   1   23.00    1.35
  -2  -8   1   22.88    1.31
  -2  -8   1   23.75    1.38
  -2  -8   1   24.99    1.42
   2  -8  -1   22.04    1.37
  -2  -8   1   23.93    1.36
   2  -8  -1   21.68    1.35
  -2  -8   1   23.46    1.34
  -2  -8   1   21.59    1.35
  -2  -8   1   20.20    1.49
   2  -8  -1   25.45    1.37
   2  -8  -1   21.86    1.41
   2  -8  -1   22.76    1.39
   2   8  -1   22.80    1.29
  -2   8   1   21.72    1.36
  -2   8   1   21.84    1.35
  -2   8   1   22.40    1.38
   2   8  -1   22.80    1.29
  -2   8   1   22.65    1.36
  -2   8   1   25.21    1.42
  -2   8   1   21.02    1.35
  -2   8   1   24.17    1.36
   2   8  -1   22.32    1.29
   2   8  -1   22.61    1.29
   1  -8  -1    9.36    0.63
   1  -8  -1    7.58    0.71
   1  -8  -1    8.73    0.67
   1  -8  -1    9.90    0.70
   1  -8  -1    8.28    0.73
  -1  -8   1    9.49    0.62
   1  -8  -1   10.02    0.66
  -1  -8   1    9.18    0.63
  -1  -8   1    9.77    0.62
  -1  -8   1    9.78    0.74
  -1  -8   1    8.40    0.69
  -1  -8   1    9.93    0.57
  -1  -8   1    9.38    0.89
  -1  -8   1    8.86    0.69
  -1  -8   1    7.58    0.68
   1  -8  -1    8.69    0.63
  -1  -8   1   10.16    0.66
   1  -8  -1    8.47    0.69
   1  -8  -1    7.71    0.88
  -1   8   1   10.71    0.66
   1   8  -1    9.23    0.59
  -1   8   1    8.94    0.63
   1   8  -1    8.78    0.60
   1   8  -1    9.37    0.69
   1   8  -1    8.82    0.59
  -1   8   1    9.61    0.74
  -1   8   1    9.63    0.63
  -1   8   1    9.85    0.70
   1   8  -1    9.38    0.59
  -1   8   1    8.73    0.62
  -1   8   1    8.00    0.62
   1   8  -1   10.27    0.77
   0  -8  -1   13.64    0.82
   0  -8  -1   13.16    0.95
   0  -8   1   13.65    0.91
   0  -8   1   14.78    0.82
   0  -8   1   15.09    0.95
   0  -8   1   14.87    0.97
   0  -8  -1   15.98    0.91
   0  -8   1   14.73    0.94
   0  -8  -1   13.45    0.95
   0  -8   1   14.04    1.12
   0  -8   1   14.64    0.89
   0  -8  -1   14.26    0.82
   0  -8   1   14.00    0.94
   0  -8  -1   13.27    0.89
   0  -8  -1   12.93    0.95
   0  -8   1   13.54    0.88
   0  -8  -1   15.52    0.95
   0  -8  -1   14.16    0.92
   0  -8  -1   13.52    0.88
   0  -8   1   14.14    0.89
   0  -8  -1   12.34    1.09
   0   8  -1   14.16    0.88
   0   8   1   14.50    0.87
   0   8  -1   13.99    0.93
   0   8   1   13.95    0.86
   0   8   1   14.19    0.87
   0   8   1   15.73    0.91
   0   8  -1   15.06    1.01
   0   8  -1   14.05    0.88
   0   8   1   16.26    0.98
   0   8  -1   15.35    0.89
   0   8   1   13.53    0.86
   0   8   1   14.67    0.95
  -1  -8  -1   29.53    1.85
  -1  -8  -1   28.50    1.82
  -1  -8  -1   31.46    1.89
   1  -8   1   33.94    1.87
  -1  -8  -1   29.10    1.82
   1  -8   1   32.47    1.85
   1  -8   1   31.26    1.89
  -1  -8  -1   31.93    1.81
   1  -8   1   31.74    1.85
   1  -8   1   31.34    1.90
  -1  -8  -1   32.88    1.87
   1  -8   1   30.02    1.98
  -1  -8  -1   31.18    1.80
   1  -8   1   32.07    1.84
  -1  -8  -1   33.19    1.86
   1  -8   1   31.65    1.88
  -1  -8  -1   31.92    1.88
  -1  -8  -1   33.45    1.85
  -1   8  -1   31.32    1.84
  -1   8  -1   32.90    1.85
   1   8   1   31.79    1.80
  -1   8  -1   34.03    1.88
  -1   8  -1   31.61    1.89
  -1   8  -1   30.56    1.84
   1   8   1   31.63    1.81
  -1   8  -1   31.62    1.91
   1   8   1   34.24    1.91
   1   8   1   31.39    1.80
  -1   8  -1   31.44    1.84
  -1   8  -1   32.64    1.84
   1   8   1   31.07    1.80
  -2  -8  -1    0.69    0.31
   2  -8   1    1.15    0.29
   2  -8   1    1.36    0.32
  -2  -8  -1    1.49    0.26
   2  -8   1    1.11    0.45
  -2  -8  -1    1.17    0.36
  -2  -8  -1    1.64    0.22
   2  -8   1    0.75    0.34
  -2  -8  -1    1.00    0.56
   2  -8   1    0.92    0.30
   2  -8   1    1.36    0.29
   2  -8   1    1.13    0.45
  -2  -8  -1    1.04    0.36
  -2  -8  -1    0.79    0.20
  -2  -8  -1    1.03    0.22
   2  -8   1    1.24    0.35
   2  -8   1    1.12    0.51
  -2  -8  -1    1.55    0.30
  -2  -8  -1    0.70    0.30
  -2  -8  -1    1.04    0.22
  -2   8  -1    1.93    0.36
  -2   8  -1    0.90    0.30
  -2   8  -1    1.17    0.30
  -2   8  -1    1.22    0.39
  -2   8  -1    1.16    0.37
  -2   8  -1    0.99    0.31
  -2   8  -1    1.01    0.27
  -2   8  -1    1.50    0.32
  -3  -8  -1   36.34    2.44
   3  -8   1   40.68    2.37
   3  -8   1   39.35    2.37
   3  -8   1   35.58    2.44
  -3  -8  -1   42.72    2.33
  -3  -8  -1   39.00    2.28
  -3  -8  -1   40.91    2.28
   3  -8   1   39.72    2.37
  -3  -8  -1   39.49    2.30
  -3  -8  -1   41.15    2.30
  -3  -8  -1   40.55    2.31
   3  -8   1   40.68    2.34
   3  -8   1   40.14    2.36
   3  -8   1   40.02    2.33
  -3  -8  -1   40.74    2.37
  -3  -8  -1   42.11    2.30
  -3  -8  -1   39.88    2.35
  -3  -8  -1   38.18    2.33
   3  -8   1   41.17    2.34
   3  -8   1   38.23    2.35
  -3   8  -1   40.40    2.36
  -3   8  -1   39.88    2.34
  -3   8  -1   41.51    2.33
  -3   8  -1   38.28    2.34
  -3   8  -1   46.11    2.36
  -3   8  -1   38.64    2.33
  -3   8  -1   42.03    2.33
  -3   8  -1   41.85    2.38
   4  -8   1    5.18    0.53
  -4  -8  -1    5.91    0.37
  -4  -8  -1    5.51    0.46
   4  -8   1    5.04    0.60
  -4  -8  -1    4.77    0.61
  -4  -8  -1    5.17    0.37
   4  -8   1    4.07    0.54
  -4  -8  -1    5.77    0.48
   4  -8   1    6.24    0.70
  -4  -8  -1    5.87    0.57
   4  -8   1    4.42    0.51
  -4  -8  -1    6.31    0.43
  -4  -8  -1    4.50    0.48
  -4  -8  -1    4.39    0.50
   4  -8   1    4.27    0.51
   4  -8   1    5.25    0.68
  -4  -8  -1    5.30    0.42
  -4  -8  -1    5.60    0.79
   4  -8   1    5.60    0.78
  -4   8  -1    5.08    0.62
  -4   8  -1    4.89    0.59
  -4   8  -1    5.51    0.51
  -4   8  -1    5.16    0.58
  -4   8  -1    5.01    0.59
  -5  -8  -1    0.51    0.29
   5  -8   1    0.84    0.37
  -5  -8  -1    0.99    0.38
  -5  -8  -1    1.79    0.20
   5  -8   1    0.98    0.39
  -5  -8  -1    1.04    0.31
   5  -8   1    1.48    0.37
  -5  -8  -1    1.58    0.30
   5  -8   1    1.15    0.43
   5  -8   1    1.19    0.37
  -5  -8  -1    1.59    0.19
   5  -8   1    1.43    0.39
  -5  -8  -1    1.26    0.35
  -5  -8  -1    1.09    0.43
   5  -8   1    0.25    0.56
  -5  -8  -1    1.40    0.16
  -5  -8  -1    1.91    0.21
   5  -8   1    0.26    0.57
  -5  -8  -1    1.46    0.68
  -5  -8  -1    1.48    0.43
   5  -8   1    0.94    0.54
  -5   8  -1    0.95    0.39
  -5   8  -1    2.24    0.34
  -5   8  -1    1.02    0.38
  -5   8  -1    1.07    0.42
  -5   8  -1    1.20    0.43
  -5   8  -1    1.68    0.47
  -5   8  -1    2.90    0.43
  -5   8  -1    1.73    0.39
   6  -8   1   14.38    1.09
   6  -8   1   14.56    1.07
   6  -8   1   16.86    1.09
   6  -8   1   14.45    1.25
   6  -8   1   14.64    1.03
  -6  -8  -1   14.10    1.16
  -6  -8  -1   15.87    1.11
  -6  -8  -1   16.02    0.99
  -6  -8  -1   15.16    1.02
  -6  -8  -1   14.53    0.99
  -6  -8  -1   14.86    1.08
   6  -8   1   14.19    1.06
   6  -8   1   14.29    1.05
  -6  -8  -1   14.73    1.03
  -6  -8  -1   14.40    1.22
   6  -8   1   15.27    1.27
  -6  -8  -1   14.92    1.04
   6  -8   1   14.13    1.22
  -6  -8  -1   15.08    0.99
  -6   8  -1   15.42    1.06
  -6   8  -1   14.56    1.09
  -6   8  -1   15.62    1.06
  -6   8  -1   17.02    1.06
  -6   8  -1   15.96    1.01
  -6   8  -1   16.52    1.07
  -6   8  -1   15.12    1.03
  -6   8  -1   13.56    1.02
  -7  -8  -1    0.00    0.47
   7  -8   1    0.32    0.70
   7  -8   1    0.45    0.63
   7  -8   1    0.46    0.49
  -7  -8  -1    0.14    0.64
   7  -8   1    0.30    0.51
  -7  -8  -1    0.33    0.33
  -7  -8  -1    0.65    0.65
   7  -8   1    0.34    0.69
  -7  -8  -1    0.48    0.39
  -7  -8  -1   -0.29    0.43
  -7  -8  -1    0.14    0.48
  -7  -8  -1   -0.14    0.61
  -7  -8  -1   -0.13    0.43
   7  -8   1    1.71    0.82
  -7  -8  -1   -0.33    0.34
   7  -8   1    0.10    0.43
   7  -8   1    0.95    0.51
   7  -8   1    0.01    0.47
  -7  -8  -1   -0.18    0.43
  -7  -8  -1    0.74    0.41
  -7   8  -1    0.50    0.52
  -7   8  -1    0.06    0.45
  -7   8  -1    0.24    0.47
  -7   8  -1    0.73    0.55
  -7   8  -1   -0.07    0.44
  -7   8  -1    0.53    0.38
  -7   8  -1   -0.37    0.51
  -7   8  -1    0.66    0.52
  -8  -8  -1    1.06    0.68
  -8  -8  -1   -0.07    0.41
   8  -8   1    0.74    0.49
   8  -8   1   -0.02    0.55
  -8  -8  -1   -0.17    0.36
  -8  -8  -1   -0.07    0.49
  -8  -8  -1    0.91    0.65
  -8  -8  -1    0.47    0.77
   8  -8   1    0.00    0.47
  -8  -8  -1   -0.09    0.73
   8  -8   1    0.21    0.50
   8  -8   1    1.00    0.78
   8  -8   1    0.12    0.65
   8  -8   1   -0.52    0.50
  -8  -8  -1    0.07    0.49
  -8  -8  -1    0.02    0.43
  -8  -8  -1   -0.02    0.50
  -8  -8  -1   -0.08    0.36
   8  -8   1    0.62    0.78
  -8  -8  -1    0.70    0.80
  -8   8  -1   -0.08    0.55
  -8   8  -1    0.09    0.52
  -8   8  -1   -0.01    0.60
  -8   8  -1    0.17    0.67
  -8   8  -1    0.19    0.60
  -8   8  -1    0.02    0.48
  -8   8  -1    0.01    0.16
  -8   8  -1    0.00    0.20
  -9  -8  -1    9.14    1.10
   9  -8   1    7.86    0.83
  -9  -8  -1    7.61    0.79
   9  -8   1    5.33    0.76
  -9  -8  -1    7.43    0.90
   9  -8   1    7.55    1.02
  -9  -8  -1    7.95    0.97
   9  -8   1    6.04    0.86
  -9  -8  -1    6.55    0.82
  -9  -8  -1    6.88    0.76
  -9  -8  -1    7.10    0.91
  -9  -8  -1    6.82    0.88
   9  -8   1    7.59    1.06
   9  -8   1    7.16    0.87
  -9  -8  -1    8.47    0.73
  -9  -8  -1    6.56    0.95
   9  -8   1    7.82    0.89
  -9  -8  -1    8.15    0.98
   9  -8   1    6.49    1.03
  -9   8  -1    6.83    0.54
  -9   8  -1    7.36    0.91
  -9   8  -1    7.61    0.86
  -9   8  -1    8.27    0.87
  -9   8  -1    9.07    0.92
  -9   8  -1    7.75    0.83
  -9   8  -1    7.60    0.92
  10  -8   1    0.57    0.55
  10  -8   1    0.33    1.06
 -10  -8  -1    1.36    0.72
  10  -8   1   -0.10    1.02
 -10  -8  -1    0.37    0.63
  10  -8   1    0.57    0.62
 -10  -8  -1    0.95    0.63
 -10  -8  -1    1.22    0.52
  10  -8   1    1.48    0.69
 -10  -8  -1    0.86    0.57
 -10  -8  -1    0.76    0.63
  10  -8   1    0.98    0.66
 -10  -8  -1    1.69    0.77
  10  -8   1    1.15    0.63
  10  -8   1    1.61    0.84
 -10  -8  -1    0.43    0.63
 -10  -8  -1    1.99    1.54
  10  -8   1    1.03    0.68
 -10  -8  -1    0.98    0.76
 -10   8  -1    0.81    0.59
 -10   8  -1    0.76    0.26
 -10   8  -1    0.66    0.85
 -10   8  -1    0.77    0.54
 -10   8  -1    0.77    0.78
 -10   8  -1    0.54    0.78
 -10   8  -1    1.25    0.34
 -10   8  -1    0.55    0.60
 -11  -8  -1    2.06    0.79
  11  -8   1    1.62    1.32
 -11  -8  -1    1.24    0.78
  11  -8   1    1.81    0.86
 -11  -8  -1    1.88    0.68
  11  -8   1    3.00    1.35
  11  -8   1    1.44    1.02
  11  -8   1    1.28    0.69
  11  -8   1    1.65    0.79
 -11  -8  -1    1.59    0.76
  11  -8   1    1.77    0.78
 -11  -8  -1    2.03    1.01
 -11  -8  -1    1.34    0.65
  11  -8   1    1.20    0.83
  11  -8   1    1.02    1.35
 -11  -8  -1    2.46    0.61
 -11  -8  -1    1.63    0.78
 -11  -8  -1    3.07    0.83
 -11   8  -1    1.86    0.66
 -11   8  -1    1.45    0.85
 -11   8  -1    1.41    0.33
 -11   8  -1    1.94    0.85
 -11   8  -1    1.78    0.43
 -11   8  -1    1.59    0.66
 -11   8  -1    1.54    0.74
 -11   8  -1    1.37    0.78
 -10  -9   1    0.68    0.79
 -10  -9   1   -0.05    0.50
 -10  -9   1    0.36    0.57
 -10  -9   1   -0.25    0.67
 -10  -9   1    0.17    0.81
 -10  -9   1    0.19    0.89
  10  -9  -1    0.15    0.73
  10  -9  -1    0.09    0.71
  10  -9  -1   -0.29    0.81
  10  -9  -1   -0.17    0.66
 -10  -9   1    0.05    0.73
 -10  -9   1    0.10    0.48
 -10  -9   1    0.11    0.65
  10  -9  -1   -0.30    0.64
  10  -9  -1    0.31    0.96
  10  -9  -1    0.06    1.23
 -10  -9   1    0.42    0.66
  10  -9  -1   -0.11    1.19
  10  -9  -1    0.54    0.74
 -10   9   1    0.00    0.74
 -10   9   1   -0.37    0.88
 -10   9   1    0.26    0.90
 -10   9   1   -0.07    0.75
 -10   9   1   -0.79    0.55
   9  -9  -1    0.11    0.60
  -9  -9   1    0.63    0.51
  -9  -9   1    1.31    0.59
   9  -9  -1   -0.26    0.62
   9  -9  -1    0.50    0.65
  -9  -9   1    0.62    0.71
  -9  -9   1    0.01    0.42
   9  -9  -1    0.61    0.58
  -9  -9   1    1.02    0.86
  -9  -9   1    0.31    0.61
  -9  -9   1    0.74    0.71
  -9  -9   1    0.56    0.72
  -9  -9   1    0.41    0.67
   9  -9  -1    0.21    0.65
  -9  -9   1    0.25    0.44
   9  -9  -1    1.11    0.67
   9  -9  -1    0.31    0.84
  -9   9   1    0.94    0.50
  -9   9   1    0.61    0.89
  -9   9   1    0.01    1.18
  -9   9   1    0.61    0.70
  -9   9   1    0.70    1.21
   8  -9  -1    0.78    0.64
   8  -9  -1    0.92    0.58
  -8  -9   1    0.51    0.53
  -8  -9   1    0.70    0.38
  -8  -9   1    1.26    0.71
   8  -9  -1    0.18    0.85
   8  -9  -1    0.01    1.65
   8  -9  -1    0.98    0.65
  -8  -9   1    1.20    0.43
  -8  -9   1    0.30    0.55
   8  -9  -1    2.32    1.65
  -8  -9   1    1.17    0.70
   8  -9  -1    0.51    0.49
   8  -9  -1    0.18    0.66
  -8  -9   1    0.95    0.61
  -8  -9   1    1.39    0.51
   8  -9  -1    1.25    0.57
  -8   9   1    0.73    0.55
  -8   9   1    0.98    0.50
  -8   9   1    1.26    0.63
  -8   9   1    0.44    0.61
  -8   9   1    1.05    0.62
  -7  -9   1    0.06    0.34
   7  -9  -1    0.03    0.82
  -7  -9   1    0.35    0.61
  -7  -9   1   -0.23    0.26
  -7  -9   1    0.13    0.50
  -7  -9   1    0.10    0.44
   7  -9  -1   -0.10    0.50
  -7  -9   1    0.17    0.25
  -7  -9   1    0.12    0.46
   7  -9  -1   -0.07    0.52
   7  -9  -1   -0.75    0.52
   7  -9  -1   -0.11    0.49
   7  -9  -1   -0.31    0.50
   7  -9  -1   -0.26    0.72
   7  -9  -1    0.12    0.79
   7  -9  -1    0.40    0.46
  -7  -9   1   -0.62    0.57
  -7  -9   1    0.19    0.60
  -7  -9   1    0.09    0.38
  -7  -9   1   -0.22    0.25
  -7  -9   1    0.72    0.26
  -7   9   1   -0.15    0.53
  -7   9   1   -0.07    0.51
  -7   9   1    0.36    0.53
  -7   9   1   -0.11    0.55
  -7   9   1   -0.42    0.40
   6  -9  -1   -0.30    0.44
   6  -9  -1    0.53    0.51
  -6  -9   1    0.02    0.43
  -6  -9   1    0.26    0.26
   6  -9  -1    0.16    0.77
  -6  -9   1   -0.33    0.39
  -6  -9   1   -0.19    0.25
  -6  -9   1    0.04    0.61
  -6  -9   1    0.14    0.29
  -6  -9   1    0.27    0.63
  -6  -9   1   -0.47    0.45
   6  -9  -1    0.40    0.66
  -6  -9   1   -0.15    0.28
   6  -9  -1    0.20    0.50
   6  -9  -1    0.23    0.46
  -6  -9   1    0.63    0.77
  -6  -9   1   -0.06    0.33
  -6  -9   1    0.21    0.48
  -6  -9   1    0.27    0.32
   6  -9  -1   -0.86    0.69
   6  -9  -1   -0.34    0.71
   6  -9  -1    0.39    0.45
  -6   9   1   -0.11    0.50
  -6   9   1    0.04    0.38
  -6   9   1   -0.03    0.47
  -6   9   1    0.10    0.45
   5  -9  -1    4.22    0.52
   5  -9  -1    4.77    0.62
   5  -9  -1    3.98    0.53
  -5  -9   1    4.76    0.81
   5  -9  -1    5.06    0.74
   5  -9  -1    1.75    0.91
   5  -9  -1    4.72    0.62
  -5  -9   1    5.65    0.75
  -5  -9   1    4.54    0.42
   5  -9  -1    4.70    0.65
   5  -9  -1    3.36    0.71
  -5  -9   1    4.74    0.54
  -5  -9   1    5.04    0.53
  -5  -9   1    4.90    0.62
   5  -9  -1    5.30    0.69
  -5  -9   1    3.60    0.61
  -5  -9   1    5.25    0.50
  -5  -9   1    4.56    0.41
  -5   9   1    4.90    0.63
  -5   9   1    5.07    0.59
  -5   9   1    5.16    0.68
   4  -9  -1    1.39    0.38
   4  -9  -1    0.94    0.44
   4  -9  -1    1.26    0.38
  -4  -9   1    0.63    0.38
   4  -9  -1    0.68    0.39
  -4  -9   1    1.45    0.34
  -4  -9   1    0.94    0.49
   4  -9  -1    0.97    0.69
  -4  -9   1    1.42    0.28
   4  -9  -1    1.68    0.59
  -4  -9   1    1.53    0.30
   4  -9  -1    2.46    0.43
  -4  -9   1    2.01    0.71
   4  -9  -1    1.37    0.54
  -4  -9   1    1.36    0.28
  -4  -9   1   -0.43    0.94
   4  -9  -1    0.94    0.58
  -4  -9   1    1.11    0.30
  -4   9   1    1.12    0.50
  -4   9   1    1.75    0.44
  -4   9   1    0.80    0.41
  -4   9   1    1.43    0.51
  -4   9   1    1.83    0.48
  -4   9   1    1.49    0.47
  -4   9   1    1.59    0.37
  -3  -9   1    0.83    0.39
  -3  -9   1    2.09    0.30
  -3  -9   1    2.03    0.34
   3  -9  -1    0.89    0.37
   3  -9  -1    1.96    0.53
  -3  -9   1    0.61    0.39
  -3  -9   1    1.40    0.30
   3  -9  -1    0.83    0.68
   3  -9  -1   -0.06    0.57
   3  -9  -1    2.00    0.60
  -3  -9   1    1.71    0.72
   3  -9  -1    0.97    0.38
  -3  -9   1    1.24    0.28
   3  -9  -1    0.98    0.45
  -3  -9   1    1.35    0.40
   3  -9  -1    1.50    0.38
  -3  -9   1    1.76    0.49
  -3  -9   1    0.80    0.30
   3  -9  -1    1.46    0.36
  -3   9   1    1.28    0.40
  -3   9   1    1.23    0.36
  -3   9   1    1.11    0.42
  -3   9   1    1.53    0.39
  -3   9   1    2.10    0.48
  -2  -9   1   55.61    3.03
  -2  -9   1   51.02    3.05
  -2  -9   1   51.59    3.02
  -2  -9   1   55.27    3.04
  -2  -9   1   45.91    3.18
   2  -9  -1   52.58    3.08
   2  -9  -1   53.88    3.07
  -2  -9   1   52.58    3.07
   2  -9  -1   57.23    3.07
   2  -9  -1   53.35    3.04
  -2  -9   1   50.53    3.05
   2  -9  -1   54.47    3.05
  -2  -9   1   56.07    3.01
  -2  -9   1   53.20    3.05
  -2  -9   1   56.72    3.11
   2  -9  -1   47.03    3.09
   2  -9  -1   49.90    3.09
   2   9  -1   52.99    2.99
  -2   9   1   52.24    3.07
  -2   9   1   51.60    3.04
   2   9  -1   53.37    2.99
  -2   9   1   57.52    3.06
  -2   9   1   53.67    3.11
  -2   9   1   53.60    3.09
  -2   9   1   54.21    3.04
   2   9  -1   52.08    2.99
   2   9  -1   52.43    2.99
  -2   9   1   52.87    3.07
  -1  -9   1   12.61    0.84
  -1  -9   1   12.83    0.94
  -1  -9   1   11.39    1.13
   1  -9  -1   11.98    0.86
  -1  -9   1   11.27    0.88
   1  -9  -1   11.97    0.81
   1  -9  -1   12.02    0.92
   1  -9  -1   12.02    0.92
  -1  -9   1   11.80    0.82
  -1  -9   1   12.43    0.82
  -1  -9   1   11.29    0.88
  -1  -9   1   12.09    0.81
   1  -9  -1   11.92    0.90
  -1  -9   1   13.02    0.74
   1  -9  -1   13.38    0.85
  -1  -9   1   12.01    0.89
   1  -9  -1   11.27    1.10
   1  -9  -1   13.38    0.91
   1  -9  -1   12.19    0.82
   1   9  -1   12.13    0.97
  -1   9   1   11.04    0.80
  -1   9   1   11.78    0.80
  -1   9   1   12.62    0.80
   1   9  -1   11.47    0.76
  -1   9   1   12.42    0.80
   1   9  -1   11.72    0.76
   1   9  -1   13.22    0.77
  -1   9   1   14.38    1.03
  -1   9   1   12.52    0.96
  -1   9   1   13.31    0.84
   1   9  -1   11.52    0.76
   0  -9   1    9.96    0.70
   0  -9   1    9.37    0.75
   0  -9   1    9.92    0.67
   0  -9   1    7.69    0.97
   0  -9   1    7.96    0.54
   0  -9   1    8.52    0.80
   0  -9  -1   10.50    0.70
   0  -9   1    9.29    0.54
   0  -9  -1    9.93    0.72
   0  -9  -1    9.32    0.99
   0  -9  -1    8.01    0.76
   0  -9  -1    9.51    0.78
   0  -9  -1    9.60    0.65
   0  -9  -1   10.65    0.78
   0  -9   1    8.65    0.66
   0  -9   1    7.54    0.80
   0  -9   1    8.08    0.66
   0  -9  -1    8.45    0.74
   0  -9   1    8.31    0.77
   0  -9  -1    9.89    0.64
   0   9  -1    9.11    0.63
   0   9   1    9.33    0.61
   0   9   1    9.89    0.63
   0   9  -1    9.33    0.63
   0   9   1   10.01    0.62
   0   9  -1    8.51    0.74
   0   9  -1    9.12    0.66
   0   9  -1    9.27    0.63
   0   9   1   10.27    0.83
   0   9   1    8.33    0.61
   0   9   1    9.07    0.68
   0   9  -1    8.45    0.63
   0   9  -1    9.54    0.83
   1  -9   1    0.35    0.32
   1  -9   1   -0.06    0.47
   1  -9   1    1.38    0.45
  -1  -9  -1    0.91    0.41
  -1  -9  -1    1.23    0.41
  -1  -9  -1    0.30    0.40
   1  -9   1    1.15    0.33
  -1  -9  -1    1.16    0.41
   1  -9   1   -0.10    0.48
  -1  -9  -1    0.67    0.17
  -1  -9  -1    1.18    0.19
   1  -9   1    1.34    0.32
  -1  -9  -1    0.73    0.29
  -1  -9  -1    1.03    0.29
  -1  -9  -1    0.54    0.61
  -1  -9  -1    1.55    0.31
   1  -9   1    0.67    0.34
   1  -9   1   -0.19    0.58
  -1  -9  -1    1.39    0.34
   1  -9   1    1.04    0.37
  -1   9  -1    0.53    0.30
   1   9   1    1.12    0.20
   1   9   1    0.84    0.20
  -1   9  -1    0.47    0.29
   1   9   1    1.15    0.20
   1   9   1    0.81    0.19
  -1   9  -1    1.46    0.39
  -1   9  -1    1.19    0.29
  -1   9  -1    1.10    0.48
  -2  -9  -1    9.97    0.68
  -2  -9  -1    8.94    0.58
   2  -9   1    8.13    0.68
   2  -9   1    9.25    0.71
  -2  -9  -1    7.29    0.69
   2  -9   1    8.75    0.68
   2  -9   1    9.46    0.85
   2  -9   1    9.26    0.69
  -2  -9  -1    7.89    0.75
  -2  -9  -1   10.37    0.71
   2  -9   1   10.21    0.78
  -2  -9  -1    8.33    0.61
  -2  -9  -1    8.89    0.59
  -2  -9  -1    8.07    0.61
   2  -9   1    8.08    0.85
  -2  -9  -1    7.96    0.70
   2  -9   1    9.46    0.83
   2  -9   1    6.46    0.98
  -2  -9  -1    7.66    0.96
  -2  -9  -1    9.95    0.78
  -2   9  -1    7.59    0.71
  -2   9  -1   10.01    0.83
  -2   9  -1    8.69    0.75
  -2   9  -1    8.70    0.87
  -2   9  -1    9.18    0.66
  -2   9  -1    8.15    0.66
  -2   9  -1    9.13    0.67
  -2   9  -1    9.17    0.93
   3  -9   1    6.43    0.90
  -3  -9  -1    8.44    0.67
   3  -9   1    7.18    0.66
  -3  -9  -1    8.29    0.64
  -3  -9  -1    8.52    0.57
  -3  -9  -1    8.65    0.72
   3  -9   1    8.22    0.70
  -3  -9  -1    7.55    0.63
   3  -9   1    7.41    0.86
   3  -9   1    6.80    0.64
  -3  -9  -1    8.23    0.55
   3  -9   1    8.11    0.63
  -3  -9  -1    6.92    0.62
   3  -9   1    7.83    0.97
   3  -9   1    7.69    0.77
  -3  -9  -1    6.95    1.00
  -3  -9  -1    7.52    0.58
  -3  -9  -1    8.31    0.56
  -3  -9  -1    7.95    0.76
   3  -9   1    8.03    0.88
  -3   9  -1    8.92    0.80
  -3   9  -1    9.39    1.09
  -3   9  -1    8.52    0.64
  -3   9  -1    6.97    0.73
  -3   9  -1    8.15    0.67
  -3   9  -1    8.21    0.66
   4  -9   1    3.75    0.76
  -4  -9  -1    2.57    0.45
   4  -9   1    3.31    0.54
  -4  -9  -1    3.26    0.38
   4  -9   1    4.20    0.57
  -4  -9  -1    2.64    0.78
   4  -9   1    2.93    0.45
  -4  -9  -1    3.70    0.35
   4  -9   1    2.83    0.48
   4  -9   1    3.29    0.50
  -4  -9  -1    3.99    0.58
   4  -9   1    4.32    0.68
  -4  -9  -1    3.70    0.34
   4  -9   1    3.92    0.51
  -4  -9  -1    4.15    0.42
   4  -9   1    2.47    0.63
  -4  -9  -1    2.92    0.39
  -4  -9  -1    3.39    0.48
  -4  -9  -1    3.95    0.51
  -4  -9  -1    3.55    0.38
  -4   9  -1    2.89    0.55
  -4   9  -1    3.50    0.51
  -4   9  -1    3.28    0.52
  -4   9  -1    2.71    0.44
  -4   9  -1    3.43    0.56
  -4   9  -1    2.58    0.46
  -4   9  -1    2.43    0.46
  -4   9  -1    3.75    0.50
   5  -9   1    0.62    0.69
   5  -9   1    0.39    0.70
  -5  -9  -1    1.17    0.21
   5  -9   1    0.58    0.41
  -5  -9  -1    1.30    0.38
  -5  -9  -1    0.68    0.44
  -5  -9  -1    0.86    0.20
   5  -9   1    0.64    0.47
   5  -9   1    0.48    0.41
  -5  -9  -1    1.10    0.26
  -5  -9  -1    1.30    0.37
  -5  -9  -1    1.34    1.11
  -5  -9  -1    0.79    0.49
   5  -9   1    1.11    0.82
   5  -9   1    1.04    0.43
  -5  -9  -1    1.09    0.27
  -5  -9  -1    0.99    0.34
   5  -9   1    1.69    0.50
  -5  -9  -1    1.22    0.34
  -5  -9  -1    0.75    0.53
   5  -9   1    0.83    0.67
  -5   9  -1    1.68    0.45
  -5   9  -1    1.39    0.47
  -5   9  -1    0.70    0.46
  -5   9  -1    1.44    0.40
  -5   9  -1    1.13    0.48
  -5   9  -1    0.97    0.46
  -5   9  -1    1.45    0.54
  -5   9  -1    1.43    0.48
   6  -9   1   12.23    1.04
  -6  -9  -1   14.44    0.99
   6  -9   1   15.49    1.04
   6  -9   1   11.98    1.10
  -6  -9  -1   15.28    1.96
   6  -9   1   14.72    1.08
   6  -9   1   13.60    1.32
   6  -9   1   14.24    1.07
  -6  -9  -1   13.09    1.05
  -6  -9  -1   13.63    0.96
  -6  -9  -1   14.42    0.99
  -6  -9  -1   14.16    1.39
  -6  -9  -1   13.13    1.02
  -6  -9  -1   15.03    0.96
   6  -9   1   13.82    1.31
   6  -9   1   13.29    1.03
  -6  -9  -1   13.60    1.09
  -6  -9  -1   14.84    1.12
  -6   9  -1   14.03    1.12
  -6   9  -1   14.10    1.00
  -6   9  -1   14.58    1.08
  -6   9  -1   14.45    1.01
  -6   9  -1   13.08    1.04
  -6   9  -1   14.59    1.02
  -6   9  -1   13.05    1.05
  -6   9  -1   14.57    1.08
  -7  -9  -1    9.26    1.21
   7  -9   1    9.01    0.90
  -7  -9  -1   11.74    1.12
   7  -9   1    9.98    0.94
   7  -9   1    9.80    1.12
   7  -9   1   11.43    0.96
  -7  -9  -1   10.50    0.80
  -7  -9  -1   10.57    0.89
  -7  -9  -1   11.35    0.82
   7  -9   1    7.92    1.01
  -7  -9  -1    9.73    0.87
  -7  -9  -1    9.86    0.80
   7  -9   1    8.72    1.14
   7  -9   1    7.34    0.89
  -7  -9  -1    9.89    0.93
   7  -9   1    9.10    1.12
  -7  -9  -1    9.87    1.22
  -7  -9  -1   11.54    0.97
   7  -9   1   10.71    0.98
  -7  -9  -1   11.00    1.02
  -7   9  -1   10.00    0.97
  -7   9  -1   11.46    0.94
  -7   9  -1   10.22    0.95
  -7   9  -1    9.59    0.94
  -7   9  -1    9.02    0.95
  -7   9  -1    9.32    1.00
   8  -9   1    5.41    0.72
  -8  -9  -1    4.94    0.73
   8  -9   1    6.46    0.82
   8  -9   1    5.21    1.19
  -8  -9  -1    6.61    0.69
  -8  -9  -1    7.45    1.10
   8  -9   1    4.11    0.73
  -8  -9  -1    6.88    0.91
  -8  -9  -1    6.11    0.95
   8  -9   1    5.35    0.71
  -8  -9  -1    6.60    0.68
  -8  -9  -1    3.15    0.86
  -8  -9  -1    5.14    0.66
   8  -9   1    5.23    1.17
  -8  -9  -1    4.96    0.76
   8  -9   1    3.21    0.91
  -8  -9  -1    7.74    0.88
   8  -9   1    4.60    0.71
  -8  -9  -1    5.97    0.84
   8  -9   1    5.00    0.74
  -8  -9  -1    4.52    0.73
  -8   9  -1    6.79    0.82
  -8   9  -1    5.31    0.86
  -8   9  -1    5.06    0.81
  -8   9  -1    4.61    0.85
  -8   9  -1    6.38    0.82
  -8   9  -1    4.61    0.73
  -8   9  -1    6.14    0.75
  -8   9  -1    6.57    0.85
   9  -9   1   -0.16    0.66
  -9  -9  -1    0.70    0.63
  -9  -9  -1    0.49    0.50
  -9  -9  -1    0.38    0.93
  -9  -9  -1    1.30    1.10
  -9  -9  -1    0.74    0.75
  -9  -9  -1    0.21    0.58
   9  -9   1    1.85    0.65
   9  -9   1    0.32    0.66
  -9  -9  -1    0.34    0.69
  -9  -9  -1    1.41    1.61
   9  -9   1    1.11    0.75
  -9  -9  -1    1.50    0.80
  -9  -9  -1    0.22    0.47
   9  -9   1    0.08    0.86
   9  -9   1    0.63    0.68
   9  -9   1    0.27    0.79
  -9  -9  -1    0.42    0.66
  -9  -9  -1    1.06    0.95
  -9   9  -1    0.76    0.71
  -9   9  -1   -0.20    0.66
  -9   9  -1    0.07    0.54
  -9   9  -1    0.50    0.60
  -9   9  -1    1.02    0.73
  -9   9  -1    1.05    0.73
  -9   9  -1    0.43    0.77
  -9   9  -1    0.10    0.78
 -10  -9  -1    2.05    0.54
 -10  -9  -1    1.84    0.64
 -10  -9  -1    2.63    1.07
  10  -9   1    2.44    0.85
 -10  -9  -1    2.19    1.20
  10  -9   1    1.42    0.78
 -10  -9  -1    2.64    0.75
 -10  -9  -1    1.82    0.66
 -10  -9  -1    2.19    0.74
 -10  -9  -1    1.99    0.81
 -10  -9  -1    2.50    0.80
  10  -9   1    0.85    0.78
  10  -9   1    2.84    2.16
  10  -9   1    1.23    0.74
  10  -9   1    1.58    0.79
  10  -9   1    2.18    0.97
  10  -9   1    2.75    2.20
  10  -9   1    1.01    0.76
 -10  -9  -1    1.83    0.77
 -10  -9  -1    1.37    0.56
 -10  -9  -1    3.39    0.95
 -10   9  -1    2.38    0.67
 -10   9  -1    0.79    0.91
 -10   9  -1    1.92    0.84
 -10   9  -1    1.10    0.77
 -10   9  -1    3.69    0.76
 -10   9  -1    2.04    0.29
 -10   9  -1    2.44    0.85
 -10   9  -1    1.85    0.28
 -10   9  -1    2.04    0.79
 -10   9  -1    2.45    0.91
   9 -10  -1    0.36    0.87
  -9 -10   1    0.05    0.87
  -9 -10   1    0.07    0.63
  -9 -10   1    0.05    0.74
   9 -10  -1   -0.29    0.71
  -9 -10   1    0.06    0.75
   9 -10  -1    0.89    1.36
  -9 -10   1   -0.17    1.15
  -9 -10   1    1.37    1.06
   9 -10  -1    0.39    1.10
  -9 -10   1    0.29    0.52
   9 -10  -1    1.31    1.39
   9 -10  -1   -0.11    0.61
   9 -10  -1    0.00    0.86
   9 -10  -1    0.14    0.76
  -9 -10   1    0.39    0.71
  -9 -10   1   -0.22    0.70
   9 -10  -1    0.35    0.86
  -9 -10   1    0.28    0.52
  -9 -10   1    1.62    0.91
  -9  10   1    0.51    0.83
  -9  10   1   -0.07    0.88
  -9  10   1    0.06    0.83
  -9  10   1    0.03    0.63
  -9  10   1   -0.40    0.90
   8 -10  -1    7.83    1.31
   8 -10  -1    5.17    0.85
  -8 -10   1    8.03    0.76
   8 -10  -1    6.79    0.83
   8 -10  -1    7.55    0.99
  -8 -10   1    9.51    1.36
   8 -10  -1    5.97    0.84
  -8 -10   1    5.18    0.76
  -8 -10   1    7.93    0.92
   8 -10  -1    6.18    0.84
   8 -10  -1    5.01    1.32
   8 -10  -1   11.35    1.37
  -8 -10   1    7.92    1.03
  -8 -10   1    8.03    0.75
  -8 -10   1    6.61    0.94
   8 -10  -1    4.69    1.07
  -8 -10   1    8.08    1.13
  -8 -10   1    8.05    0.89
  -8  10   1    5.06    1.11
  -8  10   1    9.04    0.92
  -8  10   1    6.38    0.94
  -8  10   1    6.51    0.92
  -8  10   1    5.31    0.90
  -8  10   1    4.91    0.92
  -8  10   1    8.11    1.07
   7 -10  -1    0.65    0.69
  -7 -10   1    0.60    0.94
   7 -10  -1    0.79    1.09
  -7 -10   1    0.59    0.73
   7 -10  -1    0.47    0.61
   7 -10  -1    0.63    0.52
  -7 -10   1    0.69    0.43
  -7 -10   1    0.54    0.44
  -7 -10   1    0.58    0.53
   7 -10  -1    0.60    1.11
   7 -10  -1   -0.35    1.05
   7 -10  -1    0.50    0.63
  -7 -10   1    0.69    0.30
   7 -10  -1    0.19    0.94
  -7 -10   1   -0.01    0.49
  -7 -10   1    0.17    0.66
   7 -10  -1   -0.80    1.10
  -7 -10   1    0.64    0.31
  -7 -10   1    1.89    0.82
  -7 -10   1    1.21    0.60
  -7  10   1    0.23    0.77
  -7  10   1    0.84    0.70
  -7  10   1    0.47    0.68
  -7  10   1    1.35    0.76
  -7  10   1    0.80    0.50
  -7  10   1    0.18    0.64
  -7  10   1    0.61    0.62
  -6 -10   1    1.75    0.60
   6 -10  -1    3.16    0.97
   6 -10  -1    2.66    0.64
  -6 -10   1    4.62    0.75
  -6 -10   1    3.12    0.41
   6 -10  -1    2.35    0.57
  -6 -10   1    4.96    1.12
   6 -10  -1    2.85    0.58
   6 -10  -1    2.28    0.57
  -6 -10   1    2.33    0.48
   6 -10  -1    2.28    0.58
  -6 -10   1    2.82    0.36
  -6 -10   1    2.76    0.36
  -6 -10   1    1.11    0.50
  -6 -10   1    2.45    0.47
  -6 -10   1    2.54    0.61
  -6 -10   1    3.60    1.25
  -6 -10   1    2.40    0.42
   6 -10  -1    2.05    0.98
   6 -10  -1    2.76    0.99
  -6 -10   1    4.11    0.56
   6 -10  -1    2.33    0.58
  -6  10   1    2.04    0.61
  -6  10   1    2.73    0.64
  -6  10   1    2.04    0.68
  -6  10   1    2.87    0.51
  -6  10   1    2.37    0.69
   5 -10  -1    9.63    0.89
  -5 -10   1    7.93    0.62
  -5 -10   1    8.23    0.83
   5 -10  -1    6.85    1.05
   5 -10  -1    9.61    0.79
  -5 -10   1    8.55    0.71
  -5 -10   1    9.00    0.71
  -5 -10   1    7.98    0.74
   5 -10  -1    6.75    0.94
   5 -10  -1    8.37    0.79
   5 -10  -1    8.21    0.83
   5 -10  -1    8.80    1.05
  -5 -10   1    8.01    1.10
   5 -10  -1    8.24    0.90
   5 -10  -1    8.71    1.05
  -5 -10   1    6.65    0.91
  -5 -10   1    8.83    0.71
  -5 -10   1    7.95    0.62
  -5 -10   1    8.70    0.96
  -5 -10   1    8.58    0.71
  -5  10   1    8.75    0.84
  -5  10   1   11.17    0.89
  -5  10   1    8.93    0.92
  -5  10   1    6.12    0.80
  -5  10   1    8.45    0.94
  -5  10   1    8.06    0.88
  -5  10   1    9.13    0.85
   4 -10  -1    0.43    0.43
   4 -10  -1    0.79    0.51
   4 -10  -1    1.11    0.72
   4 -10  -1    0.51    0.47
  -4 -10   1    0.56    0.45
  -4 -10   1    0.95    0.36
  -4 -10   1    0.62    0.33
   4 -10  -1    0.55    0.75
   4 -10  -1    0.68    0.43
  -4 -10   1    1.23    0.41
  -4 -10   1    0.91    0.84
   4 -10  -1    0.78    0.75
  -4 -10   1    1.06    0.58
   4 -10  -1    0.66    0.46
  -4 -10   1    1.01    0.35
  -4 -10   1    1.61    0.46
   4 -10  -1    0.86    0.79
  -4 -10   1    0.77    0.57
  -4 -10   1    0.67    0.34
  -4 -10   1    1.44    0.52
  -4  10   1    1.78    0.91
  -4  10   1    0.58    0.48
  -4  10   1    0.76    0.49
  -4  10   1    1.01    0.41
  -4  10   1    0.91    0.55
  -4  10   1    0.71    0.48
  -4  10   1    1.22    0.49
  -3 -10   1    3.06    0.40
   3 -10  -1    2.13    0.49
  -3 -10   1    2.96    0.50
   3 -10  -1    2.62    0.47
   3 -10  -1    2.49    0.53
  -3 -10   1    2.38    0.88
   3 -10  -1    3.29    0.75
  -3 -10   1    2.88    0.40
   3 -10  -1    1.97    0.79
  -3 -10   1    1.79    0.49
  -3 -10   1    1.93    0.47
   3 -10  -1    2.64    0.49
   3 -10  -1    3.59    0.75
  -3 -10   1    3.09    0.77
  -3 -10   1    3.34    0.43
  -3 -10   1    2.76    0.39
   3 -10  -1    2.56    0.50
  -3 -10   1    2.62    0.35
   3 -10  -1    2.65    0.47
  -3  10   1    2.46    0.58
  -3  10   1    3.13    0.47
  -3  10   1    2.71    0.47
  -3  10   1    3.27    0.45
  -3  10   1    1.96    0.46
  -3  10   1    2.75    0.47
  -3  10   1    2.93    0.55
   2 -10  -1    5.76    0.77
  -2 -10   1    7.67    0.62
   2 -10  -1    6.95    0.78
  -2 -10   1    7.08    0.67
  -2 -10   1    6.50    0.61
  -2 -10   1    7.02    0.53
  -2 -10   1    8.83    0.64
   2 -10  -1    4.59    0.93
   2 -10  -1    6.95    0.67
  -2 -10   1    6.99    0.73
   2 -10  -1    7.31    0.68
  -2 -10   1    7.93    0.83
   2 -10  -1    6.18    0.78
  -2 -10   1    7.65    0.53
  -2 -10   1    6.98    0.77
   2 -10  -1    6.55    0.76
   2 -10  -1    8.36    0.71
  -2 -10   1    7.68    0.77
   2 -10  -1    7.79    0.69
  -2 -10   1    7.55    1.09
  -2  10   1    7.65    0.66
  -2  10   1    6.49    0.66
   2  10  -1    6.87    0.44
  -2  10   1    8.51    0.84
  -2  10   1    6.34    0.62
  -2  10   1    6.96    0.62
  -2  10   1    7.59    0.79
  -2  10   1    7.79    0.67
   2  10  -1    7.83    0.45
  -1 -10   1    7.55    0.69
   1 -10  -1    6.98    0.84
  -1 -10   1    8.08    0.81
   1 -10  -1    7.75    0.74
  -1 -10   1    7.19    0.54
  -1 -10   1    8.21    0.82
   1 -10  -1    8.63    0.86
   1 -10  -1    7.69    1.14
  -1 -10   1    8.30    0.79
   1 -10  -1    9.39    0.69
  -1 -10   1    8.59    0.68
  -1 -10   1    8.59    0.83
  -1 -10   1    9.50    0.73
   1 -10  -1    9.53    0.74
   1 -10  -1    9.46    0.70
   1 -10  -1    8.87    0.83
  -1 -10   1    6.72    0.68
  -1 -10   1    8.61    0.54
   1  10  -1    8.39    0.58
  -1  10   1    9.85    0.89
  -1  10   1    8.37    0.65
  -1  10   1    9.33    0.85
  -1  10   1    9.74    0.66
   1  10  -1    9.43    0.98
   1  10  -1    8.70    0.60
   1  10  -1    8.00    0.60
  -1  10   1    7.29    0.65
  -1  10   1    8.74    0.71
  -1  10   1    7.83    0.65
   1  10  -1    9.12    0.58
   0 -10   1    3.16    0.56
   0 -10  -1    1.19    0.79
   0 -10   1    2.25    0.89
   0 -10  -1    2.99    0.45
   0 -10   1    4.04    0.61
   0 -10  -1    4.38    0.59
   0 -10   1    3.72    0.52
   0 -10   1    2.57    0.47
   0 -10   1    3.31    0.45
   0 -10   1    3.39    0.63
   0 -10  -1    2.96    0.50
   0 -10  -1    3.29    0.46
   0 -10  -1    2.06    0.43
   0 -10  -1    3.46    0.57
   0 -10   1    3.42    0.46
   0 -10   1    3.42    0.62
   0  10  -1    4.33    0.46
   0  10  -1    3.03    0.39
   0  10   1    3.15    0.43
   0  10  -1    4.34    0.46
   0  10  -1    5.18    0.66
   0  10  -1    3.11    0.38
   0  10   1    2.94    0.57
   0  10  -1    3.35    0.42
   0  10   1    3.75    0.40
   0  10   1    3.42    0.40
   0  10   1    4.28    0.42
   0  10   1    4.02    0.41
   0  10  -1    5.42    0.70
  -1 -10  -1    0.14    0.78
  -1 -10  -1    0.06    0.17
  -1 -10  -1    0.29    0.47
   1 -10   1    0.63    0.38
   1 -10   1   -0.22    0.41
  -1 -10  -1    0.64    0.39
   1 -10   1    0.63    0.47
   1 -10   1    0.60    0.36
  -1 -10  -1    0.15    0.36
  -1 -10  -1    1.00    0.35
   1 -10   1    0.21    0.55
  -1 -10  -1    0.62    0.49
  -1 -10  -1    0.52    0.18
  -1 -10  -1    0.54    0.36
   1 -10   1   -0.32    0.57
  -1 -10  -1    0.79    0.48
   1 -10   1   -0.06    0.57
  -1 -10  -1    0.35    0.84
   1 -10   1    0.58    0.40
   1 -10   1   -0.27    0.77
  -1  10  -1    0.46    0.44
   1  10   1    0.62    0.21
  -1  10  -1    0.82    0.35
  -1  10  -1    0.36    0.34
  -1  10  -1    1.63    0.88
  -1  10  -1    0.83    0.36
   1  10   1    0.32    0.20
  -1  10  -1    0.84    0.35
  -1  10  -1    0.75    0.37
  -2 -10  -1   12.78    0.82
  -2 -10  -1   12.02    1.00
  -2 -10  -1   12.24    0.92
  -2 -10  -1   12.43    0.77
  -2 -10  -1    9.52    1.25
  -2 -10  -1   12.43    0.90
   2 -10   1   10.02    1.08
  -2 -10  -1   11.89    0.82
   2 -10   1   13.91    1.07
  -2 -10  -1   12.67    0.87
   2 -10   1   10.61    1.25
   2 -10   1    9.85    1.20
   2 -10   1   10.35    0.91
   2 -10   1   12.39    0.90
   2 -10   1   13.83    0.89
   2 -10   1   13.11    0.93
  -2 -10  -1   11.10    0.76
  -2 -10  -1   11.36    0.97
  -2 -10  -1   10.96    0.92
  -2  10  -1   12.99    0.87
  -2  10  -1   12.01    0.86
  -2  10  -1   14.01    0.97
  -2  10  -1   11.63    0.86
  -2  10  -1   14.30    1.08
  -3 -10  -1    0.18    0.27
  -3 -10  -1    0.03    0.77
  -3 -10  -1    0.47    0.30
  -3 -10  -1    0.76    0.31
  -3 -10  -1    0.63    0.42
   3 -10   1    0.57    0.47
   3 -10   1    1.11    0.43
   3 -10   1    0.55    0.48
  -3 -10  -1    0.26    0.38
   3 -10   1    0.33    0.69
  -3 -10  -1    0.81    0.32
  -3 -10  -1    1.24    0.44
  -3 -10  -1    0.88    0.40
   3 -10   1    0.58    0.76
   3 -10   1    0.15    0.71
   3 -10   1    0.23    0.52
  -3 -10  -1    1.73    0.52
   3 -10   1    1.59    0.50
   3 -10   1    0.95    0.44
  -3 -10  -1    0.68    0.53
  -3  10  -1   -0.14    0.55
  -3  10  -1    1.02    0.38
  -3  10  -1    0.72    0.46
  -3  10  -1    1.05    0.46
  -3  10  -1    0.57    0.44
  -3  10  -1    0.60    0.45
  -3  10  -1    0.41    0.51
  -4 -10  -1    2.05    0.38
  -4 -10  -1    1.66    0.32
   4 -10   1    1.80    0.86
  -4 -10  -1    1.80    0.51
   4 -10   1    1.92    0.55
   4 -10   1    2.62    0.49
   4 -10   1    1.65    0.48
   4 -10   1    1.19    0.81
  -4 -10  -1    1.73    0.42
  -4 -10  -1    1.73    0.41
  -4 -10  -1    1.79    0.31
  -4 -10  -1    2.10    0.44
   4 -10   1    1.60    0.53
  -4 -10  -1    1.37    0.90
  -4 -10  -1    2.34    0.61
  -4 -10  -1    1.52    0.42
  -4 -10  -1    1.37    0.34
   4 -10   1    2.16    0.52
   4 -10   1    1.15    0.49
   4 -10   1    1.36    0.84
  -4  10  -1    1.72    0.51
  -4  10  -1    1.31    0.51
  -4  10  -1    3.03    0.61
  -4  10  -1    1.36    0.51
  -4  10  -1    2.15    0.43
  -4  10  -1    1.89    0.51
  -4  10  -1    1.68    0.62
  -5 -10  -1    3.44    0.41
  -5 -10  -1    4.36    0.63
  -5 -10  -1    2.59    0.60
   5 -10   1    2.44    0.65
  -5 -10  -1    3.25    0.38
  -5 -10  -1    3.29    0.48
  -5 -10  -1    4.41    0.40
   5 -10   1    4.16    0.63
  -5 -10  -1    3.26    0.47
  -5 -10  -1    4.50    0.62
   5 -10   1    4.22    0.59
   5 -10   1    3.09    0.56
  -5 -10  -1    1.52    0.89
  -5 -10  -1    3.73    0.37
   5 -10   1    2.78    0.91
   5 -10   1    2.82    0.94
   5 -10   1    1.38    0.88
   5 -10   1    3.04    0.55
   5 -10   1    4.42    0.62
  -5 -10  -1    3.22    0.45
  -5 -10  -1    2.80    0.79
  -5  10  -1    4.04    0.51
  -5  10  -1    4.30    0.66
  -5  10  -1    3.51    0.70
  -5  10  -1    2.53    0.63
  -5  10  -1    3.22    0.64
  -5  10  -1    2.93    0.56
  -6 -10  -1    3.27    0.49
  -6 -10  -1    2.57    1.04
   6 -10   1    2.21    0.65
  -6 -10  -1    3.05    0.61
  -6 -10  -1    2.84    0.48
   6 -10   1    2.38    0.90
  -6 -10  -1    3.59    0.87
  -6 -10  -1    4.37    0.71
  -6 -10  -1    2.41    0.46
  -6 -10  -1    2.82    0.71
  -6 -10  -1    2.60    0.70
   6 -10   1    1.53    0.56
   6 -10   1    2.58    0.99
   6 -10   1    2.50    0.59
   6 -10   1    3.19    0.72
   6 -10   1    3.26    0.62
   6 -10   1    3.27    0.65
   6 -10   1    1.91    0.99
  -6 -10  -1    2.69    0.52
  -6  10  -1    2.32    0.59
  -6  10  -1    3.27    0.65
  -6  10  -1    3.32    0.69
  -6  10  -1    2.87    0.69
  -6  10  -1    2.46    0.61
  -6  10  -1    2.26    0.67
  -6  10  -1    1.74    0.59
  -7 -10  -1   11.59    1.46
  -7 -10  -1   10.63    1.31
  -7 -10  -1   12.49    1.17
  -7 -10  -1   11.65    0.96
   7 -10   1   11.11    1.09
   7 -10   1    7.82    1.26
  -7 -10  -1    9.33    1.07
   7 -10   1   11.98    1.35
   7 -10   1    9.50    1.03
   7 -10   1   10.66    1.02
  -7 -10  -1   12.31    0.93
  -7 -10  -1   10.17    1.09
   7 -10   1    9.71    1.32
  -7 -10  -1   11.66    0.91
   7 -10   1   10.02    1.03
  -7 -10  -1   10.60    0.91
   7 -10   1   12.23    1.01
   7 -10   1   10.78    1.11
  -7 -10  -1    9.64    0.99
  -7 -10  -1   11.21    1.37
  -7  10  -1   10.77    1.02
  -7  10  -1   12.96    1.09
  -7  10  -1    9.34    1.04
  -7  10  -1   10.13    1.00
  -7  10  -1   11.07    0.98
  -7  10  -1   10.28    1.14
  -7  10  -1   10.95    1.05
  -7  10  -1   10.13    1.16
  -8 -10  -1    1.14    0.80
  -8 -10  -1    1.07    0.56
  -8 -10  -1    0.39    0.53
  -8 -10  -1    1.03    0.92
   8 -10   1    0.47    0.79
   8 -10   1    0.95    0.70
   8 -10   1    0.05    0.97
  -8 -10  -1    0.86    0.63
  -8 -10  -1    0.51    0.87
  -8 -10  -1    0.78    0.70
   8 -10   1   -0.23    1.09
   8 -10   1    1.45    0.72
   8 -10   1    0.47    0.67
  -8 -10  -1    0.98    1.01
   8 -10   1    0.79    0.86
  -8 -10  -1    0.43    1.19
  -8 -10  -1   -0.25    0.76
  -8 -10  -1    0.90    0.55
  -8 -10  -1    0.40    0.65
   8 -10   1    0.39    0.70
   8 -10   1    0.09    1.11
  -8  10  -1    0.62    0.86
  -8  10  -1   -0.13    0.80
  -8  10  -1    0.36    0.56
  -8  10  -1    1.46    0.89
  -8  10  -1   -0.11    0.72
  -8  10  -1    0.97    0.81
  -8  10  -1    0.17    0.80
  -8  10  -1   -0.16    1.09
   9 -10   1    1.14    1.32
   9 -10   1    0.01    0.82
  -9 -10  -1    0.05    0.69
  -9 -10  -1   -0.17    0.79
   9 -10   1   -0.09    0.74
  -9 -10  -1    0.96    0.80
  -9 -10  -1    0.12    0.65
  -9 -10  -1    0.67    0.96
  -9 -10  -1    0.03    0.56
  -9 -10  -1    0.06    0.86
  -9 -10  -1    0.27    0.72
   9 -10   1   -0.92    1.03
   9 -10   1   -0.61    1.27
  -9 -10  -1    0.22    0.58
   9 -10   1   -0.42    0.75
  -9 -10  -1    0.61    1.08
  -9 -10  -1   -0.07    0.73
   9 -10   1    0.46    0.77
  -9 -10  -1   -0.33    1.20
   9 -10   1    0.86    0.91
   9 -10   1    0.67    0.96
  -9  10  -1   -0.65    0.90
  -9  10  -1   -1.02    0.87
  -9  10  -1    0.48    0.87
  -9  10  -1   -0.25    0.64
  -9  10  -1   -0.36    0.73
  -9  10  -1   -0.04    0.79
   7 -11  -1   -0.52    0.72
   7 -11  -1   -0.35    1.20
  -7 -11   1    0.57    0.73
  -7 -11   1    0.74    1.08
   7 -11  -1   -0.59    1.23
   7 -11  -1    0.05    0.75
   7 -11  -1    0.39    0.67
  -7 -11   1   -0.60    0.56
  -7 -11   1   -0.02    0.50
   7 -11  -1    0.17    0.85
  -7 -11   1   -0.71    0.70
  -7 -11   1   -0.22    0.30
   7 -11  -1    0.23    1.29
  -7 -11   1   -0.12    0.87
   7 -11  -1    0.56    1.16
  -7 -11   1   -1.08    0.80
   7 -11  -1   -0.29    1.32
  -7 -11   1   -0.20    0.96
  -7 -11   1   -0.09    0.31
  -7 -11   1   -0.42    1.05
  -7  11   1    0.02    0.75
  -7  11   1    0.12    0.62
  -7  11   1    0.00    0.80
  -7  11   1    0.42    0.69
  -7  11   1    0.18    0.78
  -6 -11   1    0.68    0.51
   6 -11  -1    0.08    0.67
  -6 -11   1    0.58    0.93
  -6 -11   1    0.35    0.50
   6 -11  -1   -0.45    0.70
  -6 -11   1   -0.09    0.67
  -6 -11   1    0.22    0.48
  -6 -11   1    0.41    1.29
  -6 -11   1    0.51    0.82
   6 -11  -1    0.03    0.67
   6 -11  -1    0.39    1.15
  -6 -11   1    0.26    0.71
   6 -11  -1    0.30    0.73
   6 -11  -1    0.19    1.18
  -6 -11   1    1.41    0.70
   6 -11  -1    0.34    0.65
  -6 -11   1    0.04    0.45
   6 -11  -1    0.23    0.63
  -6 -11   1   -0.54    0.45
  -6 -11   1    0.05    0.48
   6 -11  -1    0.05    1.15
  -6  11   1    0.08    0.73
  -6  11   1    0.23    0.73
  -6  11   1    0.61    0.72
  -6  11   1   -0.06    0.76
  -6  11   1   -0.47    0.70
  -6  11   1    0.28    0.57
  -5 -11   1    1.02    0.53
  -5 -11   1   -0.70    1.10
  -5 -11   1    0.36    0.63
   5 -11  -1    0.93    1.14
  -5 -11   1    1.28    0.40
  -5 -11   1    0.99    0.41
  -5 -11   1    1.86    0.44
  -5 -11   1    1.27    0.50
   5 -11  -1    1.44    0.59
   5 -11  -1    0.44    0.59
   5 -11  -1    0.45    0.93
   5 -11  -1    1.05    0.73
   5 -11  -1   -0.24    0.58
   5 -11  -1    0.33    0.96
  -5 -11   1    0.86    0.46
  -5 -11   1    1.22    0.45
  -5 -11   1    0.25    0.76
   5 -11  -1    0.23    0.58
  -5 -11   1    0.55    0.67
   5 -11  -1    0.59    0.60
  -5 -11   1    1.00    0.52
  -5  11   1    1.42    0.54
  -5  11   1    0.64    0.63
  -5  11   1    0.36    0.63
[truncated: 3,247,615 more chars]
