# Supplementary material for: Multicolor Photochromism of Two-Component Diarylethene Crystals Containing Oxidized and Unoxidized Benzothiophene Groups
Source: MDPI journal article supplement (doi:10.3390/cryst12121730), 2022-11-29
Supplement: s1 [file s1 › 3_1a2a.cif]

data_global

_publ_requested_journal          Crystals

_publ_contact_author_name        'Masakazu Morimoto'
_publ_contact_author_address     
;Department of Chemistry, Rikkyo University
3-34-1 Nishi-Ikebukuro, Toshima-ku, Tokyo 171-8501, Japan
;
_publ_contact_author_email       m-morimoto@rikkyo.ac.jp
_publ_contact_author_phone       ?
_publ_contact_author_fax         ?
loop_
_publ_author_name
_publ_author_address
'Nishimura, Ryo'
;Department of Chemistry, Rikkyo University
3-34-1 Nishi-Ikebukuro, Toshima-ku, Tokyo 171-8501, Japan
;
'Nagakawa, Yurika'
;Department of Chemistry, Rikkyo University
3-34-1 Nishi-Ikebukuro, Toshima-ku, Tokyo 171-8501, Japan
;
'Morimoto, Masakazu'
;Department of Chemistry, Rikkyo University
3-34-1 Nishi-Ikebukuro, Toshima-ku, Tokyo 171-8501, Japan
;
_audit_creation_method           'APEX3 v2015.9-0'

_publ_section_title              
;
;
_publ_section_abstract           
;
;
_publ_section_references         
;
;
_publ_section_comment            
;
;

data_1a2a
_chemical_name_systematic               ?
_chemical_name_common                   ?
_chemical_formula_moiety                ?
_chemical_formula_sum                   'C25 H18 F6 O3.57 S2'
_chemical_formula_iupac                 ?
_chemical_formula_weight                553.60

_chemical_melting_point                 ?

_space_group_crystal_system             monoclinic
_space_group_name_H-M_alt               'C 1 2/c 1'
_space_group_name_Hall                  '-C 2yc'
loop_
    _space_group_symop_operation_xyz
    'x, y, z'
    '-x, y, -z+1/2'
    'x+1/2, y+1/2, z'
    '-x+1/2, y+1/2, -z+1/2'
    '-x, -y, -z'
    'x, -y, z-1/2'
    '-x+1/2, -y+1/2, -z'
    'x+1/2, -y+1/2, z-1/2'

_cell_length_a                          15.0533(5)
_cell_length_b                          15.1878(5)
_cell_length_c                          10.6375(3)
_cell_angle_alpha                       90
_cell_angle_beta                        107.8093(13)
_cell_angle_gamma                       90
_cell_volume                            2315.47(13)
_cell_formula_units_Z                   4
_cell_measurement_reflns_used           995
_cell_measurement_theta_min             2.4568
_cell_measurement_theta_max             28.3351
_cell_measurement_temperature           223.(2)

_exptl_crystal_description              block
_exptl_crystal_colour                   colourless
_exptl_crystal_size_max                 0.481
_exptl_crystal_size_mid                 0.187
_exptl_crystal_size_min                 0.144
_exptl_crystal_density_diffrn           1.588
_exptl_crystal_density_meas             ?
_exptl_crystal_density_method           'not measured'
_exptl_crystal_F_000                    1130.2

_exptl_absorpt_coefficient_mu           0.311
_exptl_absorpt_correction_type          multi-scan
_exptl_absorpt_process_details          'SADABS V2014/5 (Bruker AXS Inc.)'
_exptl_absorpt_correction_T_min         0.91
_exptl_absorpt_correction_T_max         0.96

_exptl_special_details                  
;
 The crystal was prepared by recrystallization of a mixture of 1a and 2a
(molar ratio, 1a : 2a = 70 : 30) from acetone.
; 

_diffrn_ambient_temperature             223.(2)

_diffrn_source                          ?
_diffrn_source_type                     ?

_diffrn_radiation_type                  'MoKa'
_diffrn_radiation_wavelength            0.71073
_diffrn_radiation_monochromator         ?

_diffrn_measurement_device_type         'Bruker D8 goniometer'
_diffrn_measurement_method              ?

_diffrn_detector_area_resol_mean        ?

_diffrn_reflns_number                   28739
_diffrn_reflns_av_R_equivalents         0.0407
_diffrn_reflns_av_unetI/netI            0.0225
_diffrn_reflns_theta_min                2.47
_diffrn_reflns_theta_max                26.37
_diffrn_reflns_theta_full               26.37
_diffrn_measured_fraction_theta_max     1.000
_diffrn_measured_fraction_theta_full    1.000
_diffrn_reflns_limit_h_min              -18
_diffrn_reflns_limit_h_max              18
_diffrn_reflns_limit_k_min              -18
_diffrn_reflns_limit_k_max              18
_diffrn_reflns_limit_l_min              -13
_diffrn_reflns_limit_l_max              12

_refine_special_details                 
;
 The occupancy factor of the oxygen atoms (O1 and O2) were calculated 
to be 0.89 by the refinement.
;

_reflns_number_total                    2367
_reflns_number_gt                       2162
_reflns_threshold_expression            'I > 2\s(I)'

_refine_ls_structure_factor_coef        Fsqd
_refine_ls_matrix_type                  full
_refine_ls_R_factor_all                 0.0565
_refine_ls_R_factor_gt                  0.0529
_refine_ls_wR_factor_gt                 0.1394
_refine_ls_wR_factor_ref                0.1420
_refine_ls_goodness_of_fit_ref          1.245
_refine_ls_restrained_S_all             1.245
_refine_ls_number_reflns                2367
_refine_ls_number_parameters            201
_refine_ls_number_restraints            0
_refine_ls_number_constraints           ?
_refine_ls_hydrogen_treatment           constr
_refine_ls_weighting_scheme             calc
_refine_ls_weighting_details            
    'w=1/[\s^2^(Fo^2^)+(0.0690P)^2^+2.4996P] where P=(Fo^2^+2Fc^2^)/3'

_atom_sites_solution_hydrogens          geom
_atom_sites_solution_primary            ?
_atom_sites_solution_secondary          ?

_refine_ls_shift/su_max                 0.000
_refine_ls_shift/su_mean                0.000
_refine_diff_density_max                0.583
_refine_diff_density_min                -0.545
_refine_ls_extinction_method            none
_refine_ls_extinction_coef              ?

loop_
    _atom_type_symbol
    _atom_type_description
    _atom_type_scat_dispersion_real
    _atom_type_scat_dispersion_imag
    _atom_type_scat_source
    C C 0.0033 0.0016 'International Tables Vol C Tables 4.2.6.8 and 6.1.1.4'
    H H 0.0000 0.0000 'International Tables Vol C Tables 4.2.6.8 and 6.1.1.4'
    O O 0.0106 0.0060 'International Tables Vol C Tables 4.2.6.8 and 6.1.1.4'
    F F 0.0171 0.0103 'International Tables Vol C Tables 4.2.6.8 and 6.1.1.4'
    S S 0.1246 0.1234 'International Tables Vol C Tables 4.2.6.8 and 6.1.1.4'

_computing_data_collection              ?
_computing_cell_refinement              'APEX3 v2015.9-0 (Bruker AXS)'
_computing_data_reduction               ?
_computing_structure_solution           ?
_computing_structure_refinement         'SHELXL-2014/7 (Sheldrick, 2014)'
_computing_molecular_graphics           ?
_computing_publication_material         ?

loop_
    _atom_site_type_symbol
    _atom_site_label
    _atom_site_fract_x
    _atom_site_fract_y
    _atom_site_fract_z
    _atom_site_U_iso_or_equiv
    _atom_site_adp_type
    _atom_site_calc_flag
    _atom_site_refinement_flags_adp
    _atom_site_refinement_flags_occupancy
    _atom_site_refinement_flags_posn
    _atom_site_occupancy
    _atom_site_disorder_assembly
    _atom_site_disorder_group
    C C1 0.0835(2) 0.39905(18) 0.9878(3) 0.0522(7) Uani d . . . 1.0 . .
    H H1A 0.1163 0.4515 0.9744 0.078 Uiso calc U . R 1.0 . .
    H H1B 0.0804 0.3983 1.0775 0.078 Uiso calc U . R 1.0 . .
    H H1C 0.0208 0.3992 0.9263 0.078 Uiso calc U . R 1.0 . .
    C C2 0.13575(17) 0.31692(17) 0.9641(2) 0.0420(6) Uani d . . . 1.0 . .
    H H2A 0.1994 0.3179 1.0252 0.05 Uiso calc U . R 1.0 . .
    H H2B 0.1047 0.2643 0.9838 0.05 Uiso calc U . R 1.0 . .
    C C3 0.14002(14) 0.31069(14) 0.8264(2) 0.0322(5) Uani d . . . 1.0 . .
    C C4 0.09956(14) 0.25490(13) 0.7274(2) 0.0289(4) Uani d . . . 1.0 . .
    C C5 0.11941(14) 0.27373(14) 0.6014(2) 0.0309(4) Uani d . . . 1.0 . .
    C C6 0.08401(16) 0.23287(16) 0.4798(2) 0.0373(5) Uani d . . . 1.0 . .
    H H6 0.0422 0.1854 0.4689 0.045 Uiso calc U . R 1.0 . .
    C C7 0.11154(17) 0.26347(18) 0.3738(2) 0.0447(6) Uani d . . . 1.0 . .
    H H7 0.0887 0.2356 0.2913 0.054 Uiso calc U . R 1.0 . .
    C C8 0.17170(18) 0.33390(18) 0.3877(2) 0.0452(6) Uani d . . . 1.0 . .
    H H8 0.1891 0.3532 0.3146 0.054 Uiso calc U . R 1.0 . .
    C C9 0.20671(17) 0.37631(16) 0.5073(3) 0.0419(6) Uani d . . . 1.0 . .
    H H9 0.247 0.4248 0.5171 0.05 Uiso calc U . R 1.0 . .
    C C10 0.18014(15) 0.34470(14) 0.6121(2) 0.0337(5) Uani d . . . 1.0 . .
    C C11 0.04183(14) 0.17895(13) 0.7402(2) 0.0293(4) Uani d . . . 1.0 . .
    C C12 0.07735(16) 0.08589(15) 0.7383(2) 0.0389(5) Uani d . . . 1.0 . .
    C C13 -0.0127(10) 0.0277(3) 0.7319(17) 0.039(2) Uani d . P . 0.5 A .
    F F3 0.0081(4) -0.04825(19) 0.7931(4) 0.0681(15) Uani d . P . 0.5 . .
    F F4 -0.0466(3) 0.0096(3) 0.6001(3) 0.0668(10) Uani d . P . 0.5 . .
    O O1 0.30869(14) 0.36636(15) 0.8420(2) 0.0514(7) Uani d . P . 0.892(6) . .
    O O2 0.18127(17) 0.47435(13) 0.7744(2) 0.0543(7) Uani d . P . 0.892(6) . .
    F F1A 0.1399(3) 0.0671(2) 0.8672(4) 0.0549(9) Uani d . P . 0.5 A 1
    F F2A 0.1203(3) 0.0699(3) 0.6579(5) 0.0516(12) Uani d . P . 0.5 A 1
    F F1B 0.1663(2) 0.0772(3) 0.8068(5) 0.0600(11) Uani d . P . 0.5 A 2
    F F2B 0.0781(4) 0.0620(3) 0.6065(5) 0.0619(14) Uani d . P . 0.5 A 2
    S S1 0.21210(4) 0.38640(4) 0.77364(6) 0.0378(2) Uani d . . . 1.0 . .

loop_
    _atom_site_aniso_label
    _atom_site_aniso_U_11
    _atom_site_aniso_U_22
    _atom_site_aniso_U_33
    _atom_site_aniso_U_12
    _atom_site_aniso_U_13
    _atom_site_aniso_U_23
    C1 0.0609(16) 0.0492(15) 0.0549(15) -0.0158(12) 0.0303(13) -0.0204(12)
    C2 0.0446(13) 0.0446(13) 0.0365(12) -0.0088(10) 0.0119(10) -0.0047(10)
    C3 0.0315(10) 0.0262(10) 0.0392(11) -0.0023(8) 0.0111(9) 0.0011(8)
    C4 0.0265(9) 0.0239(9) 0.0375(11) 0.0024(7) 0.0114(8) 0.0000(8)
    C5 0.0270(9) 0.0290(10) 0.0384(11) 0.0052(8) 0.0123(8) 0.0004(8)
    C6 0.0330(11) 0.0383(12) 0.0402(12) 0.0043(9) 0.0107(9) -0.0041(9)
    C7 0.0426(13) 0.0555(15) 0.0356(12) 0.0145(11) 0.0115(10) -0.0008(10)
    C8 0.0466(13) 0.0519(15) 0.0426(13) 0.0140(11) 0.0217(11) 0.0129(11)
    C9 0.0389(12) 0.0373(12) 0.0539(14) 0.0058(10) 0.0208(11) 0.0127(10)
    C10 0.0322(10) 0.0298(10) 0.0406(11) 0.0037(8) 0.0132(9) 0.0033(9)
    C11 0.0300(10) 0.0237(10) 0.0333(10) 0.0007(8) 0.0087(8) -0.0017(8)
    C12 0.0372(12) 0.0259(10) 0.0528(14) 0.0050(9) 0.0124(10) -0.0026(9)
    C13 0.029(7) 0.0277(18) 0.054(9) -0.007(2) 0.005(5) -0.002(2)
    F3 0.081(3) 0.0219(12) 0.112(4) 0.0083(18) 0.045(4) 0.0189(16)
    F4 0.065(2) 0.081(3) 0.056(2) -0.0240(19) 0.0222(17) -0.0389(19)
    O1 0.0397(11) 0.0578(14) 0.0538(13) -0.0127(9) 0.0099(9) -0.0011(10)
    O2 0.0735(15) 0.0298(11) 0.0672(14) -0.0089(9) 0.0326(12) -0.0065(9)
    F1A 0.048(2) 0.0417(19) 0.057(2) 0.0132(16) -0.0098(16) 0.0010(16)
    F2A 0.056(3) 0.0322(19) 0.079(4) 0.0058(19) 0.040(2) -0.009(2)
    F1B 0.0348(18) 0.0412(19) 0.099(4) 0.0113(14) 0.0139(19) 0.004(2)
    F2B 0.111(4) 0.0323(19) 0.065(3) 0.004(3) 0.060(3) -0.006(2)
    S1 0.0397(3) 0.0310(3) 0.0434(4) -0.0099(2) 0.0137(3) -0.0027(2)

_geom_special_details                   
;

All esds (except the esd in the dihedral angle between two l.s. planes)
are estimated using the full covariance matrix.  The cell esds are taken
into account individually in the estimation of esds in distances, angles
and torsion angles; correlations between esds in cell parameters are only
used when they are defined by crystal symmetry.  An approximate (isotropic)
treatment of cell esds is used for estimating esds involving l.s. planes.
;

loop_
    _geom_bond_atom_site_label_1
    _geom_bond_atom_site_label_2
    _geom_bond_site_symmetry_2
    _geom_bond_distance
    _geom_bond_publ_flag
    C1 C2 . 1.536(4) ?
    C2 C3 . 1.489(3) ?
    C3 C4 . 1.343(3) ?
    C3 S1 . 1.785(2) ?
    C4 C11 . 1.475(3) ?
    C4 C5 . 1.488(3) ?
    C5 C6 . 1.386(3) ?
    C5 C10 . 1.395(3) ?
    C6 C7 . 1.394(3) ?
    C7 C8 . 1.380(4) ?
    C8 C9 . 1.379(4) ?
    C9 C10 . 1.381(3) ?
    C10 S1 . 1.755(2) ?
    C11 C11 2_556 1.338(4) ?
    C11 C12 . 1.514(3) ?
    C12 F2A . 1.244(6) ?
    C12 F1B . 1.320(4) ?
    C12 C13 2_556 1.420(18) ?
    C12 F1A . 1.434(4) ?
    C12 F2B . 1.452(5) ?
    C12 C13 . 1.601(15) ?
    C13 C13 2_556 0.452(17) ?
    C13 F3 2_556 1.191(8) ?
    C13 F3 . 1.315(8) ?
    C13 F4 . 1.365(16) ?
    C13 C12 2_556 1.420(18) ?
    C13 F4 2_556 1.758(14) ?
    F3 F3 2_556 0.873(8) ?
    F3 C13 2_556 1.191(8) ?
    F3 F4 2_556 1.412(6) ?
    F4 F3 2_556 1.412(6) ?
    F4 C13 2_556 1.758(14) ?
    F4 F1A 2_556 1.776(6) ?
    O1 S1 . 1.445(2) ?
    O2 S1 . 1.415(2) ?
    F1A F4 2_556 1.776(6) ?

loop_
    _geom_angle_atom_site_label_1
    _geom_angle_atom_site_label_2
    _geom_angle_atom_site_label_3
    _geom_angle_site_symmetry_1
    _geom_angle_site_symmetry_3
    _geom_angle
    _geom_angle_publ_flag
    C3 C2 C1 . . 113.0(2) ?
    C4 C3 C2 . . 131.7(2) ?
    C4 C3 S1 . . 109.50(16) ?
    C2 C3 S1 . . 118.78(16) ?
    C3 C4 C11 . . 124.04(19) ?
    C3 C4 C5 . . 114.64(19) ?
    C11 C4 C5 . . 121.30(18) ?
    C6 C5 C10 . . 118.5(2) ?
    C6 C5 C4 . . 129.0(2) ?
    C10 C5 C4 . . 112.43(19) ?
    C5 C6 C7 . . 118.7(2) ?
    C8 C7 C6 . . 121.3(2) ?
    C9 C8 C7 . . 120.9(2) ?
    C8 C9 C10 . . 117.3(2) ?
    C9 C10 C5 . . 123.1(2) ?
    C9 C10 S1 . . 127.22(19) ?
    C5 C10 S1 . . 109.62(16) ?
    C11 C11 C4 2_556 . 128.56(11) ?
    C11 C11 C12 2_556 . 110.81(12) ?
    C4 C11 C12 . . 120.57(18) ?
    F2A C12 C13 . 2_556 124.6(7) ?
    F1B C12 C13 . 2_556 117.6(4) ?
    F2A C12 F1A . . 107.0(3) ?
    C13 C12 F1A 2_556 . 87.6(5) ?
    F1B C12 F2B . . 101.6(4) ?
    C13 C12 F2B 2_556 . 105.6(7) ?
    F2A C12 C11 . . 116.9(3) ?
    F1B C12 C11 . . 112.9(2) ?
    C13 C12 C11 2_556 . 108.0(5) ?
    F1A C12 C11 . . 107.7(2) ?
    F2B C12 C11 . . 110.7(3) ?
    F2A C12 C13 . . 118.3(8) ?
    F1B C12 C13 . . 132.1(4) ?
    C13 C12 C13 2_556 . 15.8(9) ?
    F1A C12 C13 . . 103.4(5) ?
    F2B C12 C13 . . 94.5(8) ?
    C11 C12 C13 . . 102.6(4) ?
    C13 C13 F3 2_556 2_556 95.7(14) ?
    C13 C13 F3 2_556 . 64.3(14) ?
    F3 C13 F3 2_556 . 40.4(4) ?
    C13 C13 F4 2_556 . 146.(6) ?
    F3 C13 F4 2_556 . 66.7(7) ?
    F3 C13 F4 . . 106.8(7) ?
    C13 C13 C12 2_556 2_556 105.(5) ?
    F3 C13 C12 2_556 2_556 137.9(14) ?
    F3 C13 C12 . 2_556 120.7(17) ?
    F4 C13 C12 . 2_556 106.7(6) ?
    C13 C13 C12 2_556 . 59.(4) ?
    F3 C13 C12 2_556 . 116.0(14) ?
    F3 C13 C12 . . 113.1(8) ?
    F4 C13 C12 . . 101.7(14) ?
    C12 C13 C12 2_556 . 106.1(3) ?
    C13 C13 F4 2_556 2_556 26.(5) ?
    F3 C13 F4 2_556 2_556 91.6(6) ?
    F3 C13 F4 . 2_556 52.3(5) ?
    F4 C13 F4 . 2_556 157.8(7) ?
    C12 C13 F4 2_556 2_556 92.3(11) ?
    C12 C13 F4 . 2_556 83.3(4) ?
    F3 F3 C13 2_556 2_556 77.5(8) ?
    F3 F3 C13 2_556 . 62.1(8) ?
    C13 F3 C13 2_556 . 20.0(7) ?
    F3 F3 F4 2_556 2_556 139.3(3) ?
    C13 F3 F4 2_556 2_556 62.6(7) ?
    C13 F3 F4 . 2_556 80.2(6) ?
    C13 F4 F3 . 2_556 50.7(3) ?
    C13 F4 C13 . 2_556 8.3(13) ?
    F3 F4 C13 2_556 2_556 47.5(2) ?
    C13 F4 F1A . 2_556 76.7(7) ?
    F3 F4 F1A 2_556 2_556 107.7(3) ?
    C13 F4 F1A 2_556 2_556 84.8(6) ?
    C12 F1A F4 . 2_556 87.6(2) ?
    O2 S1 O1 . . 118.51(14) ?
    O2 S1 C10 . . 110.74(12) ?
    O1 S1 C10 . . 110.43(12) ?
    O2 S1 C3 . . 111.98(12) ?
    O1 S1 C3 . . 108.71(11) ?
    C10 S1 C3 . . 93.68(10) ?

_shelx_res_file                         
;


    mm417.res created by SHELXL-2014/7

TITL mm417 in C2/c
CELL 0.71073  15.05330  15.18780  10.63750  90.0000 107.8093  90.0000
ZERR    4.00   0.00050   0.00050   0.00030   0.0000   0.0013   0.0000
LATT 7
SYMM -X, Y, 0.5-Z
SFAC C  H  O  F  S
UNIT 100  72  16  24  8
OMIT 1 1 0
L.S. 75
ACTA
BOND
FMAP 2
PLAN 20
SIZE 0.144 0.187 0.481
TEMP -50
WGHT    0.069000    2.499600
FVAR       0.12774   0.89185
MOLE 1
C1    1    0.083519    0.399050    0.987764    11.00000    0.06086    0.04924 =
         0.05491   -0.02038    0.03029   -0.01582
AFIX 137
H1A   2    0.116345    0.451462    0.974418    11.00000   -1.50000
H1B   2    0.080407    0.398334    1.077502    11.00000   -1.50000
H1C   2    0.020813    0.399230    0.926308    11.00000   -1.50000
AFIX   0
C2    1    0.135750    0.316920    0.964116    11.00000    0.04462    0.04461 =
         0.03647   -0.00466    0.01188   -0.00883
AFIX  23
H2A   2    0.199442    0.317903    1.025173    11.00000   -1.20000
H2B   2    0.104662    0.264335    0.983769    11.00000   -1.20000
AFIX   0
C3    1    0.140017    0.310686    0.826362    11.00000    0.03147    0.02615 =
         0.03925    0.00106    0.01111   -0.00227
C4    1    0.099560    0.254905    0.727445    11.00000    0.02650    0.02388 =
         0.03750   -0.00002    0.01137    0.00237
C5    1    0.119410    0.273729    0.601376    11.00000    0.02696    0.02896 =
         0.03836    0.00042    0.01232    0.00516
C6    1    0.084014    0.232866    0.479775    11.00000    0.03299    0.03833 =
         0.04023   -0.00413    0.01066    0.00426
AFIX  43
H6    2    0.042240    0.185422    0.468940    11.00000   -1.20000
AFIX   0
C7    1    0.111545    0.263470    0.373814    11.00000    0.04263    0.05550 =
         0.03556   -0.00078    0.01155    0.01445
AFIX  43
H7    2    0.088678    0.235581    0.291295    11.00000   -1.20000
AFIX   0
C8    1    0.171703    0.333896    0.387714    11.00000    0.04661    0.05191 =
         0.04255    0.01285    0.02166    0.01399
AFIX  43
H8    2    0.189064    0.353228    0.314608    11.00000   -1.20000
AFIX   0
C9    1    0.206706    0.376309    0.507293    11.00000    0.03892    0.03729 =
         0.05395    0.01270    0.02081    0.00576
AFIX  43
H9    2    0.247049    0.424810    0.517070    11.00000   -1.20000
AFIX   0
C10   1    0.180141    0.344705    0.612132    11.00000    0.03217    0.02984 =
         0.04056    0.00329    0.01316    0.00375
C11   1    0.041833    0.178954    0.740211    11.00000    0.03004    0.02375 =
         0.03332   -0.00174    0.00873    0.00065
C12   1    0.077354    0.085885    0.738345    11.00000    0.03717    0.02589 =
         0.05276   -0.00257    0.01238    0.00505
C13   1   -0.012683    0.027746    0.731852    10.50000    0.02890    0.02770 =
         0.05430   -0.00218    0.00522   -0.00744
F3    4    0.008130   -0.048250    0.793083    10.50000    0.08066    0.02193 =
         0.11219    0.01892    0.04498    0.00834
F4    4   -0.046640    0.009560    0.600122    10.50000    0.06546    0.08112 =
         0.05613   -0.03892    0.02217   -0.02400
O1    3    0.308693    0.366355    0.841998    21.00000    0.03970    0.05778 =
         0.05385   -0.00109    0.00993   -0.01273
O2    3    0.181269    0.474351    0.774400    21.00000    0.07349    0.02977 =
         0.06716   -0.00651    0.03259   -0.00890
PART 1
F1A   4    0.139869    0.067136    0.867242    10.50000    0.04810    0.04171 =
         0.05727    0.00096   -0.00983    0.01317
F2A   4    0.120278    0.069867    0.657937    10.50000    0.05639    0.03223 =
         0.07934   -0.00892    0.04023    0.00581
PART 2
F1B   4    0.166257    0.077211    0.806812    10.50000    0.03478    0.04123 =
         0.09942    0.00407    0.01390    0.01126
F2B   4    0.078143    0.062038    0.606525    10.50000    0.11082    0.03228 =
         0.06489   -0.00646    0.06012    0.00364
PART 0
S1    5    0.212103    0.386404    0.773636    11.00000    0.03969    0.03101 =
         0.04343   -0.00274    0.01373   -0.00995
HKLF 4

REM  mm417 in C2/c
REM R1 =  0.0529 for    2162 Fo > 4sig(Fo)  and  0.0565 for all    2367 data
REM    201 parameters refined using      0 restraints

END

WGHT      0.0690      2.4996

REM Highest difference peak  0.583,  deepest hole -0.545,  1-sigma level  0.145
Q1    1   0.1771  0.3409  0.8131  11.00000  0.05    0.58
Q2    1   0.1442  0.3062  0.8954  11.00000  0.05    0.54
Q3    1   0.1805  0.4194  0.7923  11.00000  0.05    0.54
Q4    1   0.1047  0.3582  0.9640  11.00000  0.05    0.50
Q5    1   0.2212  0.4397  0.8347  11.00000  0.05    0.50
Q6    1   0.0906  0.2603  0.5401  11.00000  0.05    0.48
Q7    1   0.2472  0.4392  0.7942  11.00000  0.05    0.45
Q8    1   0.1114  0.2615  0.6578  11.00000  0.05    0.45
Q9    1   0.1288  0.3088  0.3994  11.00000  0.05    0.44
Q10   1   0.1065  0.2540  0.4348  11.00000  0.05    0.44
Q11   1   0.2725  0.4130  0.8640  11.00000  0.05    0.44
Q12   1   0.1920  0.3678  0.6829  11.00000  0.05    0.43
Q13   1   0.1478  0.2884  0.8278  11.00000  0.05    0.41
Q14   1   0.1442  0.0927  0.8458  11.00000  0.05    0.40
Q15   1   0.1585  0.3169  0.9810  11.00000  0.05    0.39
Q16   1   0.1430  0.3027  0.6053  11.00000  0.05    0.38
Q17   1   0.1389  0.0743  0.7527  11.00000  0.05    0.36
Q18   1   0.0456  0.4081  0.9186  11.00000  0.05    0.36
Q19   1  -0.0105  0.1794  0.7167  11.00000  0.05    0.33
Q20   1   0.0000 -0.0227  0.7500  10.50000  0.05    0.32
;
_shelx_res_checksum                     21020

_shelx_hkl_file                         
;
  -2   0   0  124.78    5.56
   2   0   0  127.91    5.56
  -2   0   0  129.00    5.55
   4   0   0  604.60   25.55
   4   0   0  575.28   25.54
  -4   0   0  587.76   25.54
   6   0   0   14.16    0.64
  -6   0   0   13.75    0.63
  -6   0   0   13.58    0.62
   6   0   0   13.52    0.63
   6   0   0   13.77    0.62
  -6   0   0   14.47    0.63
  -6   0   0   13.97    0.64
   6   0   0   14.54    0.63
  -8   0   0   50.35    2.26
  -8   0   0   51.21    2.27
   8   0   0   52.74    2.29
   8   0   0   51.80    2.26
  -8   0   0   53.46    2.28
  -8   0   0   50.42    2.28
   8   0   0   50.76    2.27
   8   0   0   53.62    2.27
 -10   0   0   82.62    3.63
  10   0   0   86.07    3.65
  10   0   0   84.41    3.66
  10   0   0   84.04    3.63
 -10   0   0   81.43    3.66
 -10   0   0   84.23    3.64
 -10   0   0   81.87    3.65
  10   0   0   81.46    3.65
 -12   0   0   18.46    0.83
 -12   0   0   17.58    0.86
  12   0   0   17.20    0.81
  12   0   0   18.00    0.84
  12   0   0   18.47    0.84
  12   0   0   18.09    0.87
 -12   0   0   17.84    0.81
 -12   0   0   16.55    0.84
 -14   0   0    3.09    0.39
 -14   0   0    3.39    0.34
  14   0   0    3.85    0.42
  14   0   0    3.50    0.29
 -14   0   0    3.69    0.32
  14   0   0    3.77    0.33
  14   0   0    3.37    0.34
 -14   0   0    3.04    0.24
  16   0   0    1.03    0.25
 -16   0   0    1.04    0.37
  16   0   0    0.74    0.42
 -16   0   0    0.51    0.29
 -16   0   0    0.63    0.18
  16   0   0    0.80    0.28
 -16   0   0    0.98    0.28
   1   1   0   45.83    1.99
   3  -1   0  540.92   25.55
  -3  -1   0  500.77   25.55
  -3  -1   0  565.11   25.55
  -3  -1   0  627.59   25.56
   3  -1   0  646.63   25.55
   3   1   0  514.07   25.55
   3   1   0  625.33   25.56
  -3   1   0  671.17   25.56
   3   1   0  541.80   25.55
   3   1   0  662.59   25.56
  -5  -1   0  109.02    4.68
  -5  -1   0  108.42    4.70
   5  -1   0  104.53    4.69
  -5  -1   0  107.95    4.69
   5  -1   0  108.55    4.69
  -5  -1   0  109.77    4.69
   5  -1   0  111.57    4.69
   5  -1   0  105.79    4.70
   5   1   0  105.83    4.69
   5   1   0  111.40    4.69
  -5   1   0  107.17    4.69
   5   1   0  104.84    4.70
  -5   1   0  107.92    4.69
   7  -1   0   67.70    2.93
   7  -1   0   69.40    2.94
  -7  -1   0   65.95    2.93
  -7  -1   0   65.31    2.94
  -7  -1   0   65.80    2.92
   7  -1   0   67.67    2.93
  -7  -1   0   70.00    2.93
   7  -1   0   67.73    2.92
  -7   1   0   67.65    2.92
  -7   1   0   64.81    2.92
   7   1   0   65.65    2.94
   7   1   0   67.25    2.93
  -7   1   0   67.88    2.93
   7   1   0   68.44    2.92
  -7   1   0   64.73    2.94
   7   1   0   66.30    2.93
  -9  -1   0   18.21    0.84
   9  -1   0   19.11    0.86
  -9  -1   0   18.65    0.86
  -9  -1   0   18.68    0.87
   9  -1   0   18.75    0.88
   9  -1   0   19.08    0.85
  -9  -1   0   19.10    0.86
  -9   1   0   19.41    0.88
  -9   1   0   19.08    0.85
   9   1   0   19.15    0.86
   9   1   0   18.54    0.87
  -9   1   0   17.76    0.86
   9   1   0   19.60    0.86
   9   1   0   18.95    0.84
  -9   1   0   19.66    0.85
 -11  -1   0    0.37    0.09
  11  -1   0   -0.05    0.13
 -11  -1   0    0.27    0.17
  11  -1   0    0.36    0.19
  11  -1   0    0.28    0.12
 -11  -1   0    0.17    0.13
  11  -1   0    0.28    0.13
  11   1   0    0.13    0.10
 -11   1   0    0.54    0.19
  11   1   0    0.28    0.14
  11   1   0    0.28    0.17
 -11   1   0    0.17    0.11
  11   1   0    0.41    0.14
 -11   1   0    0.22    0.14
 -11   1   0    0.38    0.10
 -13  -1   0    1.21    0.24
  13  -1   0    0.85    0.25
 -13  -1   0    0.99    0.20
 -13  -1   0    1.08    0.20
  13  -1   0    0.94    0.17
  13  -1   0    0.82    0.20
  13  -1   0    1.02    0.19
  13   1   0    1.01    0.19
  13   1   0    1.08    0.15
  13   1   0    0.93    0.21
 -13   1   0    1.08    0.25
 -13   1   0    0.83    0.20
  13   1   0    1.06    0.25
 -13   1   0    0.82    0.17
 -13   1   0    0.84    0.14
 -15  -1   0    0.63    0.33
 -15  -1   0    0.46    0.14
  15  -1   0    0.57    0.22
  15  -1   0    0.43    0.27
 -15  -1   0    0.43    0.25
 -15  -1   0    0.80    0.24
  15  -1   0    0.40    0.23
 -15   1   0    0.69    0.32
  15   1   0    0.45    0.34
 -15   1   0    0.44    0.16
  15   1   0    0.71    0.20
 -15   1   0    0.70    0.24
  15   1   0    0.49    0.24
 -17  -1   0    1.79    0.22
  17  -1   0    1.78    0.32
  17  -1   0    1.79    0.51
  17  -1   0    1.82    0.33
 -17  -1   0    1.68    0.36
 -17  -1   0    1.60    0.43
 -17   1   0    1.80    0.24
 -17   1   0    0.97    0.33
 -17   1   0    1.79    0.37
  17   1   0    2.02    0.52
 -17   1   0    2.31    0.48
  17   1   0    2.14    0.36
   0  -2   0   25.29    1.20
   0  -2   0   26.12    1.20
   0   2   0   28.34    1.20
   0   2   0   28.49    1.20
   0   2   0   27.38    1.20
   0   2   0   27.61    1.20
  -2  -2   0    1.77    0.11
  -2  -2   0    1.85    0.09
  -2  -2   0    1.92    0.10
   2  -2   0    1.91    0.10
  -2  -2   0    1.76    0.10
   2  -2   0    1.84    0.10
   2  -2   0    1.83    0.11
   2   2   0    1.81    0.10
   2   2   0    1.81    0.11
  -2   2   0    1.81    0.10
   2   2   0    1.83    0.11
  -2   2   0    1.75    0.10
  -2   2   0    1.82    0.10
   2   2   0    1.65    0.09
  -2   2   0    1.82    0.11
  -4  -2   0  588.25   26.79
  -4  -2   0  676.16   26.80
  -4   2   0  535.29   26.79
   4   2   0  666.97   26.80
  -4   2   0  688.16   26.80
  -4   2   0  553.49   26.80
  -6  -2   0   51.31    2.25
   6  -2   0   51.38    2.26
   6  -2   0   52.11    2.24
   6  -2   0   51.87    2.24
  -6  -2   0   50.32    2.25
   6  -2   0   51.73    2.24
  -6  -2   0   50.98    2.25
  -6  -2   0   50.66    2.23
  -6   2   0   51.94    2.24
   6   2   0   50.78    2.25
  -6   2   0   51.94    2.26
   6   2   0   51.80    2.25
  -6   2   0   51.72    2.24
  -6   2   0   51.85    2.25
   6   2   0   49.18    2.25
  -8  -2   0   22.55    0.96
  -8  -2   0   22.07    0.97
   8  -2   0   20.96    0.97
   8  -2   0   21.53    0.95
   8  -2   0   20.23    0.95
   8  -2   0   21.09    0.95
  -8  -2   0   20.95    0.94
  -8  -2   0   21.60    0.96
  -8   2   0   20.81    0.95
   8   2   0   21.72    0.96
   8   2   0   21.49    0.97
   8   2   0   22.20    0.96
  -8   2   0   20.18    0.95
  -8   2   0   21.13    0.97
   8   2   0   21.17    0.94
  10  -2   0    3.44    0.23
  10  -2   0    3.32    0.22
  10  -2   0    3.74    0.23
 -10  -2   0    3.00    0.18
 -10  -2   0    3.00    0.26
 -10  -2   0    2.94    0.23
 -10  -2   0    3.19    0.24
  10  -2   0    4.09    0.29
  10   2   0    3.33    0.24
 -10   2   0    3.33    0.24
 -10   2   0    4.18    0.28
  10   2   0    3.91    0.24
 -10   2   0    3.29    0.21
  10   2   0    3.13    0.19
  10   2   0    3.36    0.27
 -10   2   0    3.80    0.22
  12  -2   0    2.13    0.22
  12  -2   0    2.24    0.30
 -12  -2   0    2.28    0.15
  12  -2   0    2.46    0.23
 -12  -2   0    1.99    0.24
  12  -2   0    2.28    0.25
 -12  -2   0    2.22    0.24
 -12  -2   0    1.98    0.25
 -12   2   0    1.89    0.24
  12   2   0    2.25    0.26
  12   2   0    1.70    0.21
 -12   2   0    2.06    0.30
 -12   2   0    2.16    0.19
 -12   2   0    1.95    0.21
  12   2   0    1.61    0.20
 -14  -2   0    6.35    0.48
  14  -2   0    5.91    0.51
 -14  -2   0    6.59    0.36
 -14  -2   0    6.26    0.42
 -14  -2   0    7.22    0.44
  14  -2   0    6.82    0.42
  14  -2   0    6.48    0.41
 -14   2   0    6.55    0.40
 -14   2   0    6.49    0.48
  14   2   0    6.81    0.44
 -14   2   0    6.26    0.43
 -14   2   0    6.78    0.37
  14   2   0    7.28    0.52
  14   2   0    6.81    0.46
  16  -2   0    0.40    0.41
 -16  -2   0    0.38    0.32
 -16  -2   0    0.17    0.15
 -16  -2   0    0.09    0.28
  16  -2   0    0.26    0.26
 -16  -2   0    0.20    0.36
  16  -2   0    0.28    0.27
  16   2   0    0.31    0.29
 -16   2   0   -0.02    0.18
 -16   2   0    0.19    0.29
  16   2   0    0.32    0.41
 -16   2   0    0.19    0.35
 -16   2   0    0.19    0.25
  -1  -3   0  453.31   19.62
   1  -3   0  470.03   19.63
  -1  -3   0  400.15   19.62
  -1  -3   0  495.56   19.63
   1  -3   0  490.52   19.62
  -1   3   0  492.14   19.63
   1   3   0  428.09   19.62
  -1   3   0  431.91   19.62
  -1   3   0  412.95   19.63
  -3  -3   0  307.66   14.00
  -3  -3   0  328.66   14.00
   3  -3   0  348.70   14.00
   3   3   0  305.24   14.00
  -5  -3   0    8.35    0.40
  -5  -3   0    7.90    0.42
   5  -3   0    9.39    0.41
  -5  -3   0    8.92    0.42
   5  -3   0    9.47    0.41
   5  -3   0    8.70    0.41
   5  -3   0    8.84    0.43
  -5  -3   0    8.57    0.40
  -5  -3   0    9.37    0.41
   5   3   0    9.07    0.42
  -5   3   0    9.20    0.41
  -5   3   0    9.76    0.41
  -5   3   0    9.70    0.41
   5   3   0    9.12    0.41
   5   3   0    7.42    0.42
  -5   3   0    9.18    0.43
  -7  -3   0   14.24    0.65
   7  -3   0   14.95    0.65
   7  -3   0   14.64    0.65
  -7  -3   0   13.82    0.65
  -7  -3   0   13.63    0.66
   7  -3   0   13.89    0.66
   7  -3   0   14.06    0.64
  -7  -3   0   13.71    0.63
   7   3   0   14.28    0.65
   7   3   0   14.27    0.66
  -7   3   0   14.14    0.66
  -7   3   0   14.19    0.65
  -7   3   0   15.29    0.64
   7   3   0   13.76    0.65
  -7   3   0   13.99    0.64
   9  -3   0   32.49    1.39
   9  -3   0   30.91    1.39
  -9  -3   0   34.36    1.40
  -9  -3   0   31.94    1.41
  -9  -3   0   31.10    1.40
   9  -3   0   31.32    1.41
  -9  -3   0   30.18    1.37
   9  -3   0   30.38    1.39
  -9   3   0   29.99    1.39
  -9   3   0   30.06    1.38
   9   3   0   33.14    1.40
   9   3   0   31.43    1.41
  -9   3   0   29.88    1.40
   9   3   0   32.06    1.40
  -9   3   0   30.91    1.41
 -11  -3   0    8.30    0.40
  11  -3   0    9.29    0.45
  11  -3   0    9.08    0.45
 -11  -3   0    9.19    0.46
 -11  -3   0    8.56    0.48
 -11  -3   0    8.19    0.45
  11  -3   0    8.64    0.50
  11  -3   0    9.00    0.45
 -11   3   0    8.60    0.45
 -11   3   0    9.81    0.49
  11   3   0    7.81    0.49
 -11   3   0    8.71    0.43
  11   3   0    8.62    0.46
 -11   3   0    8.96    0.43
  11   3   0    8.75    0.45
 -13  -3   0    2.09    0.27
  13  -3   0    2.67    0.36
 -13  -3   0    2.61    0.18
 -13  -3   0    2.71    0.31
  13  -3   0    2.70    0.28
 -13  -3   0    2.78    0.34
  13  -3   0    2.68    0.29
  13  -3   0    2.96    0.27
 -13   3   0    2.89    0.29
 -13   3   0    2.47    0.23
 -13   3   0    2.81    0.33
  13   3   0    2.66    0.29
  13   3   0    2.57    0.35
 -13   3   0    2.53    0.24
 -15  -3   0    3.24    0.35
  15  -3   0    3.78    0.41
 -15  -3   0    3.34    0.41
  15  -3   0    3.22    0.35
  15  -3   0    3.65    0.51
 -15  -3   0    3.87    0.44
  15  -3   0    2.83    0.37
 -15  -3   0    2.95    0.23
 -15   3   0    4.27    0.39
 -15   3   0    4.02    0.33
  15   3   0    3.99    0.51
 -15   3   0    3.11    0.39
 -15   3   0    3.05    0.29
  15   3   0    3.35    0.38
 -17  -3   0   -0.07    0.32
 -17  -3   0    0.13    0.42
 -17  -3   0   -0.08    0.38
  17  -3   0    0.00    0.35
  17  -3   0    0.60    0.31
  17  -3   0    0.12    0.51
 -17   3   0   -0.03    0.29
 -17   3   0    0.25    0.41
 -17   3   0   -0.07    0.32
 -17   3   0   -0.03    0.23
  17   3   0    0.12    0.54
  17   3   0    0.14    0.57
   0  -4   0  139.39    7.13
   0  -4   0  168.95    7.14
   0  -4   0  164.65    7.13
   0   4   0  172.27    7.14
   0   4   0  176.68    7.13
   2  -4   0  798.35   30.83
   2  -4   0  714.34   30.82
  -2   4   0  703.09   30.83
   2   4   0  668.48   30.82
   2   4   0  672.05   30.83
  -4  -4   0  147.84    6.26
  -4  -4   0  139.85    6.26
  -4  -4   0  142.14    6.25
   4   4   0  140.96    6.26
  -4   4   0  140.63    6.27
   4   4   0  140.85    6.26
   4   4   0  159.93    6.25
  -4   4   0  139.75    6.26
  -6  -4   0   28.67    1.30
   6  -4   0   29.06    1.29
  -6  -4   0   32.08    1.30
   6  -4   0   28.52    1.30
  -6  -4   0   29.33    1.27
  -6  -4   0   29.97    1.27
   6  -4   0   28.97    1.29
  -6  -4   0   29.54    1.29
   6  -4   0   29.05    1.28
   6   4   0   30.99    1.30
  -6   4   0   27.48    1.29
  -6   4   0   27.88    1.30
   6   4   0   28.47    1.30
  -6   4   0   28.50    1.29
   6   4   0   29.73    1.29
  -6   4   0   27.98    1.28
   8  -4   0  116.28    4.97
   8  -4   0  112.65    4.97
  -8  -4   0  115.17    4.98
  -8  -4   0  116.79    4.98
  -8  -4   0  114.75    4.96
  -8  -4   0  111.55    4.95
   8  -4   0  113.28    4.97
   8  -4   0  114.67    4.99
  -8   4   0  113.72    4.98
   8   4   0  112.52    4.98
   8   4   0  117.39    4.98
   8   4   0  116.49    4.99
  -8   4   0  113.41    4.97
  -8   4   0  115.04    4.99
  -8   4   0  108.64    4.98
 -10  -4   0    9.21    0.50
 -10  -4   0    9.46    0.46
 -10  -4   0   10.76    0.53
  10  -4   0   10.00    0.49
  10  -4   0   11.00    0.49
 -10  -4   0    9.33    0.49
 -10  -4   0    9.49    0.45
  10  -4   0    9.90    0.49
  10  -4   0   10.46    0.54
  10   4   0   10.14    0.53
  10   4   0   10.51    0.50
 -10   4   0   10.75    0.53
 -10   4   0   10.12    0.49
 -10   4   0   10.24    0.48
 -10   4   0   10.37    0.50
  10   4   0    9.77    0.51
  12  -4   0   13.51    0.66
  12  -4   0   13.64    0.73
 -12  -4   0   13.78    0.70
 -12  -4   0   12.56    0.68
 -12  -4   0   13.64    0.62
 -12  -4   0   13.42    0.61
  12  -4   0   14.20    0.66
 -12  -4   0   13.85    0.68
  12  -4   0   13.45    0.66
 -12   4   0   13.38    0.64
  12   4   0   14.50    0.71
 -12   4   0   13.88    0.65
  12   4   0   13.30    0.68
  12   4   0   13.47    0.68
 -12   4   0   13.57    0.71
 -12   4   0   14.71    0.68
 -14  -4   0   19.51    0.98
  14  -4   0   18.99    0.97
 -14  -4   0   22.52    1.01
  14  -4   0   19.68    1.05
 -14  -4   0   20.24    0.91
  14  -4   0   19.37    0.96
  14  -4   0   19.45    0.95
 -14  -4   0   19.36    0.90
  14   4   0   20.42    0.98
 -14   4   0   19.35    0.94
 -14   4   0   20.34    1.01
  14   4   0   21.17    0.98
 -14   4   0   20.64    0.97
  14   4   0   20.44    1.03
 -16  -4   0    1.33    0.37
  16  -4   0    1.96    0.30
 -16  -4   0    1.60    0.19
 -16  -4   0    1.70    0.31
  16  -4   0    1.55    0.34
 -16  -4   0    1.62    0.18
 -16  -4   0    1.92    0.42
  16  -4   0    1.47    0.46
 -16   4   0    1.61    0.25
  16   4   0    1.19    0.47
 -16   4   0    1.62    0.27
 -16   4   0    1.35    0.42
 -16   4   0    1.77    0.33
  16   4   0    1.88    0.34
  -1  -5   0    6.95    0.32
   1  -5   0    7.26    0.32
  -1  -5   0    6.83    0.33
   1  -5   0    7.03    0.31
  -1  -5   0    6.97    0.31
   1  -5   0    6.89    0.32
  -1  -5   0    6.60    0.31
  -1  -5   0    7.05    0.33
   1  -5   0    6.56    0.33
   1  -5   0    6.78    0.33
   1   5   0    7.01    0.33
  -1   5   0    6.76    0.33
  -1   5   0    6.96    0.33
  -1   5   0    6.56    0.32
  -1   5   0    6.89    0.32
   1   5   0    6.61    0.33
   1   5   0    7.04    0.31
   1   5   0    6.40    0.32
   1   5   0    6.65    0.31
  -3  -5   0  603.17   24.85
   3  -5   0  600.81   24.87
  -3  -5   0  630.88   24.87
   3  -5   0  598.09   24.87
   3  -5   0  496.38   24.85
   3   5   0  521.78   24.85
   3   5   0  562.51   24.86
  -5  -5   0  112.45    4.95
  -5  -5   0  113.04    4.97
  -5  -5   0  117.78    4.97
   5  -5   0  114.33    4.96
   5  -5   0  117.06    4.97
   5  -5   0  118.76    4.98
   5   5   0  116.44    4.97
   5   5   0  112.83    4.98
  -5   5   0  114.45    4.97
  -5   5   0  114.66    4.96
  -5   5   0  110.99    4.98
  -5   5   0  112.49    4.97
   5   5   0  108.09    4.97
  -7  -5   0  229.37    9.33
  -7  -5   0  218.18    9.33
  -7  -5   0  223.08    9.36
  -7  -5   0  205.84    9.36
  -7  -5   0  213.17    9.35
   7  -5   0  212.35    9.37
   7  -5   0  213.92    9.35
   7   5   0  218.58    9.36
  -7   5   0  208.11    9.37
  -7   5   0  205.72    9.35
   7   5   0  215.63    9.36
  -7   5   0  214.12    9.35
   7   5   0  219.48    9.36
   9  -5   0   19.90    0.93
  -9  -5   0   20.07    0.92
  -9  -5   0   20.74    0.91
   9  -5   0   20.57    0.90
  -9  -5   0   19.39    0.90
  -9  -5   0   19.59    0.87
   9  -5   0   19.62    0.90
  -9  -5   0   20.66    0.87
   9  -5   0   19.79    0.90
  -9   5   0   18.70    0.93
  -9   5   0   19.80    0.90
   9   5   0   18.36    0.90
   9   5   0   20.51    0.92
  -9   5   0   19.57    0.90
   9   5   0   20.16    0.91
  -9   5   0   18.89    0.89
 -11  -5   0    4.25    0.23
  11  -5   0    4.82    0.29
  11  -5   0    4.73    0.30
  11  -5   0    5.25    0.31
 -11  -5   0    3.74    0.33
  11  -5   0    4.61    0.37
 -11  -5   0    4.55    0.22
 -11  -5   0    5.53    0.31
 -11  -5   0    4.66    0.34
  11   5   0    4.00    0.31
 -11   5   0    4.92    0.36
  11   5   0    5.03    0.37
 -11   5   0    4.38    0.27
  11   5   0    4.13    0.31
 -11   5   0    4.50    0.30
 -11   5   0    4.80    0.29
  13  -5   0    0.10    0.20
  13  -5   0    0.22    0.21
 -13  -5   0    0.41    0.19
  13  -5   0    0.16    0.21
  13  -5   0   -0.13    0.35
 -13  -5   0    0.26    0.09
 -13  -5   0    0.09    0.07
 -13  -5   0    0.06    0.23
 -13  -5   0   -0.01    0.25
  13   5   0    0.16    0.21
  13   5   0    0.21    0.27
 -13   5   0    0.28    0.20
 -13   5   0   -0.24    0.16
  13   5   0    0.40    0.23
 -13   5   0    0.14    0.15
 -13   5   0   -0.12    0.24
 -15  -5   0   -0.12    0.23
  15  -5   0    0.10    0.22
  15  -5   0    0.29    0.39
 -15  -5   0   -0.19    0.33
  15  -5   0   -0.24    0.29
 -15  -5   0    0.16    0.09
 -15  -5   0    0.07    0.32
  15  -5   0   -0.07    0.26
 -15  -5   0    0.05    0.11
  15   5   0   -0.07    0.27
 -15   5   0   -0.22    0.25
 -15   5   0   -0.11    0.19
  15   5   0    0.15    0.38
 -15   5   0    0.07    0.33
 -15   5   0    0.03    0.20
  17  -5   0    6.30    0.53
  17  -5   0    6.71    0.89
 -17  -5   0    7.57    0.72
 -17  -5   0    6.42    0.57
 -17   5   0    6.58    0.49
 -17   5   0    6.64    0.58
  17   5   0    6.90    0.86
 -17   5   0    6.58    0.51
  17   5   0    7.17    0.60
   0  -6   0  131.87    5.62
   0  -6   0  126.36    5.61
   0  -6   0  132.44    5.62
   0  -6   0  130.67    5.61
   0   6   0  131.21    5.62
   0   6   0  124.33    5.61
   0   6   0  127.75    5.62
   0   6   0  128.02    5.61
   2  -6   0   16.39    0.73
  -2  -6   0   16.81    0.74
   2  -6   0   15.97    0.72
   2  -6   0   16.54    0.75
  -2  -6   0   15.82    0.74
  -2  -6   0   16.62    0.74
  -2  -6   0   16.35    0.72
   2  -6   0   16.82    0.75
   2  -6   0   16.73    0.73
  -2  -6   0   16.29    0.73
   2   6   0   15.83    0.74
   2   6   0   15.55    0.73
  -2   6   0   16.70    0.74
   2   6   0   16.26    0.74
   2   6   0   15.98    0.73
  -2   6   0   16.37    0.73
  -2   6   0   15.77    0.73
   4  -6   0   98.01    4.19
  -4  -6   0   98.43    4.21
  -4  -6   0   93.85    4.19
  -4  -6   0   93.44    4.20
   4  -6   0   95.89    4.21
  -4  -6   0   95.31    4.21
   4  -6   0   98.90    4.21
   4  -6   0   95.44    4.20
  -4  -6   0   95.03    4.21
   4   6   0  100.37    4.20
   4   6   0   96.94    4.21
   4   6   0   96.34    4.21
  -4   6   0   97.14    4.20
   4   6   0   92.82    4.19
  -4   6   0   96.71    4.19
  -4   6   0   97.56    4.21
  -6  -6   0  209.15    9.06
  -6  -6   0  206.46    9.05
   6  -6   0  208.03    9.05
   6  -6   0  207.07    9.06
  -6  -6   0  201.79    9.03
  -6  -6   0  206.42    9.06
  -6   6   0  211.67    9.07
  -6   6   0  212.05    9.05
  -6   6   0  209.39    9.05
   6   6   0  202.88    9.06
   6   6   0  211.36    9.05
   6   6   0  212.34    9.06
   8  -6   0   16.11    0.74
  -8  -6   0   14.94    0.71
  -8  -6   0   14.68    0.67
  -8  -6   0   15.95    0.73
  -8  -6   0   15.38    0.72
   8  -6   0   15.33    0.70
  -8  -6   0   15.77    0.68
   8  -6   0   15.88    0.71
   8   6   0   15.94    0.73
   8   6   0   14.41    0.71
  -8   6   0   14.88    0.71
  -8   6   0   14.18    0.71
  -8   6   0   15.21    0.73
   8   6   0   15.33    0.72
  -8   6   0   16.04    0.70
  10  -6   0   46.68    2.04
 -10  -6   0   45.64    2.01
  10  -6   0   48.17    2.08
 -10  -6   0   44.65    2.02
 -10  -6   0   45.21    2.07
 -10  -6   0   45.45    2.06
 -10  -6   0   45.66    2.06
  10  -6   0   46.80    2.05
 -10   6   0   45.73    2.08
  10   6   0   44.93    2.06
 -10   6   0   47.86    2.06
 -10   6   0   47.84    2.04
 -10   6   0   45.32    2.05
  10   6   0   46.19    2.07
  10   6   0   48.40    2.06
 -12  -6   0    1.16    0.08
 -12  -6   0    1.11    0.10
 -12  -6   0    0.94    0.23
 -12  -6   0    0.84    0.18
  12  -6   0    1.20    0.23
  12  -6   0    1.91    0.31
 -12  -6   0    1.15    0.24
  12  -6   0    1.27    0.20
  12   6   0    1.42    0.29
 -12   6   0    1.04    0.20
  12   6   0    1.35    0.22
 -12   6   0    1.44    0.27
 -12   6   0    1.12    0.18
 -12   6   0    1.34    0.16
  12   6   0    2.10    0.40
  14  -6   0    7.39    0.52
 -14  -6   0    7.49    0.54
 -14  -6   0    7.31    0.47
  14  -6   0    7.42    0.48
  14  -6   0    6.68    0.62
 -14  -6   0    6.94    0.54
 -14   6   0    7.78    0.56
 -14   6   0    6.15    0.46
  14   6   0    7.26    0.50
 -14   6   0    7.02    0.44
  14   6   0    7.52    0.59
 -14   6   0    7.17    0.41
  16  -6   0    4.26    0.60
 -16  -6   0    4.45    0.57
 -16  -6   0    4.44    0.47
 -16   6   0    3.96    0.48
  16   6   0    3.39    0.48
 -16   6   0    3.58    0.38
  16   6   0    4.80    0.59
 -16   6   0    3.70    0.37
   1  -7   0   45.59    1.95
  -1  -7   0   42.96    1.96
  -1  -7   0   44.39    1.94
  -1  -7   0   44.20    1.94
   1  -7   0   46.68    1.96
   1  -7   0   44.58    1.94
   1  -7   0   46.01    1.95
  -1  -7   0   45.76    1.96
  -1  -7   0   43.13    1.95
   1  -7   0   42.32    1.96
   1   7   0   44.56    1.96
  -1   7   0   44.08    1.94
   1   7   0   43.76    1.95
  -1   7   0   44.72    1.95
   1   7   0   42.72    1.94
   1   7   0   44.39    1.94
  -1   7   0   43.06    1.96
  -1   7   0   43.32    1.95
   1   7   0   46.61    1.96
  -1   7   0   45.27    1.96
  -3  -7   0   49.55    2.14
  -3  -7   0   47.35    2.12
   3  -7   0   48.70    2.15
  -3  -7   0   48.71    2.14
   3  -7   0   49.33    2.12
  -3  -7   0   49.11    2.14
   3  -7   0   48.72    2.15
  -3  -7   0   48.25    2.12
   3  -7   0   48.70    2.13
   3  -7   0   48.00    2.12
   3   7   0   49.36    2.13
  -3   7   0   47.96    2.13
  -3   7   0   48.65    2.13
   3   7   0   49.60    2.14
   3   7   0   46.60    2.12
   3   7   0   47.49    2.14
  -3   7   0   49.78    2.15
  -5  -7   0   11.35    0.56
  -5  -7   0   12.44    0.57
   5  -7   0   11.51    0.55
  -5  -7   0   11.24    0.55
   5  -7   0   11.60    0.53
  -5  -7   0   11.74    0.52
   5  -7   0   11.01    0.56
   5  -7   0   11.49    0.56
   5   7   0   11.30    0.54
  -5   7   0   11.35    0.53
   5   7   0   11.78    0.52
  -5   7   0   11.39    0.56
  -5   7   0   11.65    0.54
   5   7   0   11.69    0.55
  -5   7   0   11.83    0.54
   5   7   0   11.40    0.56
   7  -7   0   10.22    0.53
   7  -7   0    9.84    0.49
  -7  -7   0   10.17    0.45
  -7  -7   0   10.38    0.50
  -7  -7   0    9.75    0.50
  -7  -7   0   10.40    0.48
   7  -7   0   10.32    0.48
  -7   7   0   10.13    0.49
   7   7   0    9.51    0.50
   7   7   0   10.40    0.49
   7   7   0    9.88    0.51
  -7   7   0   10.51    0.49
  -7   7   0    9.32    0.47
  -7   7   0   10.34    0.48
  -7   7   0   10.11    0.51
  -9  -7   0    1.81    0.10
  -9  -7   0    1.94    0.10
  -9  -7   0    1.77    0.19
  -9  -7   0    1.82    0.24
  -9  -7   0    1.99    0.25
   9  -7   0    1.81    0.18
   9  -7   0    2.33    0.25
   9  -7   0    1.75    0.22
  -9   7   0    1.67    0.18
  -9   7   0    2.07    0.20
  -9   7   0    1.55    0.18
   9   7   0    1.80    0.22
  -9   7   0    2.13    0.25
   9   7   0    1.91    0.26
   9   7   0    1.71    0.22
 -11  -7   0    4.26    0.35
  11  -7   0    4.72    0.31
  11  -7   0    4.63    0.32
 -11  -7   0    4.49    0.31
 -11  -7   0    4.36    0.38
  11  -7   0    4.33    0.40
 -11   7   0    4.05    0.28
  11   7   0    3.68    0.34
  11   7   0    4.49    0.39
 -11   7   0    4.50    0.32
  11   7   0    4.27    0.33
 -11   7   0    4.99    0.39
 -11   7   0    4.10    0.29
 -13  -7   0    9.31    0.59
  13  -7   0    9.86    0.67
  13  -7   0    9.24    0.58
 -13  -7   0    9.83    0.60
  13  -7   0    9.31    0.53
  13   7   0    8.86    0.64
  13   7   0    8.87    0.59
  13   7   0    9.70    0.56
 -13   7   0   10.43    0.55
 -13   7   0    8.51    0.60
 -13   7   0    9.55    0.49
 -13   7   0   10.10    0.53
  15  -7   0    0.22    0.30
 -15  -7   0    0.27    0.35
  15  -7   0   -0.05    0.48
 -15  -7   0   -0.06    0.24
 -15   7   0    0.14    0.21
 -15   7   0    0.35    0.25
 -15   7   0    0.22    0.26
  15   7   0    0.41    0.50
  15   7   0    0.13    0.30
 -15   7   0   -0.05    0.57
   0  -8   0    7.63    0.38
   0  -8   0    7.07    0.33
   0  -8   0    7.34    0.35
   0  -8   0    6.95    0.37
   0  -8   0    7.25    0.36
   0   8   0    7.09    0.38
   0   8   0    7.15    0.34
   0   8   0    7.43    0.35
   0   8   0    7.48    0.35
   0   8   0    6.91    0.37
   2  -8   0   96.41    4.15
  -2  -8   0   93.49    4.14
  -2  -8   0   93.68    4.14
   2  -8   0   97.05    4.16
  -2  -8   0   95.97    4.15
  -2  -8   0   88.01    4.15
   2  -8   0   95.83    4.15
  -2  -8   0   94.20    4.16
   2  -8   0   95.30    4.16
   2  -8   0   95.25    4.14
   2   8   0   95.93    4.16
  -2   8   0   91.43    4.14
   2   8   0   91.29    4.16
  -2   8   0   92.63    4.16
   2   8   0   96.45    4.14
  -2   8   0  109.88    4.19
   2   8   0   95.01    4.14
   2   8   0   92.60    4.15
  -2   8   0   95.99    4.16
  -4  -8   0   49.26    2.19
  -4  -8   0   48.37    2.15
  -4  -8   0   47.56    2.18
   4  -8   0   50.33    2.15
   4  -8   0   47.94    2.18
  -4  -8   0   50.13    2.18
  -4  -8   0   49.01    2.16
   4  -8   0   51.05    2.18
   4  -8   0   48.84    2.15
   4  -8   0   49.50    2.18
   4   8   0   49.50    2.16
  -4   8   0   49.69    2.16
   4   8   0   47.09    2.15
   4   8   0   48.31    2.17
  -4   8   0   50.23    2.17
  -4   8   0   49.31    2.18
   4   8   0   50.03    2.18
   6  -8   0   40.09    1.81
   6  -8   0   40.65    1.81
   6  -8   0   40.80    1.77
  -6  -8   0   42.79    1.85
  -6  -8   0   42.22    1.78
   6  -8   0   40.99    1.79
  -6  -8   0   40.71    1.80
  -6  -8   0   38.96    1.80
  -6  -8   0   39.59    1.76
  -6   8   0   39.50    1.80
   6   8   0   39.57    1.77
  -6   8   0   40.89    1.79
   6   8   0   39.53    1.79
   6   8   0   41.34    1.80
  -6   8   0   39.15    1.78
   6   8   0   40.70    1.78
  -6   8   0   38.14    1.77
  -8  -8   0   32.03    1.42
   8  -8   0   32.22    1.46
  -8  -8   0   32.67    1.44
  -8  -8   0   31.60    1.39
  -8  -8   0   31.39    1.44
   8  -8   0   30.67    1.41
  -8  -8   0   31.74    1.39
   8  -8   0   31.56    1.43
  -8   8   0   31.56    1.43
  -8   8   0   31.47    1.42
  -8   8   0   30.75    1.41
  -8   8   0   32.00    1.46
   8   8   0   31.69    1.43
   8   8   0   33.12    1.46
   8   8   0   33.43    1.44
 -10  -8   0  106.63    4.57
  10  -8   0  103.44    4.58
 -10  -8   0  103.65    4.55
  10  -8   0  103.46    4.55
  10  -8   0  101.55    4.54
 -10  -8   0  101.86    4.56
 -10   8   0  104.99    4.55
 -10   8   0  102.58    4.55
  10   8   0  100.47    4.56
  10   8   0  106.54    4.58
  10   8   0  104.45    4.55
 -10   8   0  104.48    4.53
 -10   8   0  106.03    4.58
  12  -8   0    6.61    0.46
  12  -8   0    7.36    0.56
 -12  -8   0    6.51    0.47
 -12  -8   0    7.06    0.51
 -12  -8   0    7.22    0.43
  12  -8   0    6.23    0.41
 -12   8   0    6.50    0.49
  12   8   0    6.71    0.48
 -12   8   0    7.46    0.42
  12   8   0    6.16    0.44
 -12   8   0    6.78    0.39
 -12   8   0    7.40    0.43
  12   8   0    6.38    0.51
 -14  -8   0    0.05    0.23
 -14  -8   0    0.22    0.32
  14  -8   0   -0.16    0.26
  14  -8   0    0.31    0.44
 -14   8   0   -0.16    0.23
 -14   8   0    0.02    0.23
  14   8   0    0.04    0.40
  14   8   0   -0.08    0.26
 -14   8   0    0.11    0.35
 -14   8   0    0.08    0.18
 -16  -8   0    4.47    0.55
  16  -8   0    4.10    0.69
 -16  -8   0    3.51    0.45
 -16   8   0    3.49    0.44
  16   8   0    4.24    0.54
 -16   8   0    3.65    0.41
  16   8   0    4.77    0.65
 -16   8   0    3.14    0.41
 -16   8   0    4.71    0.55
  -1  -9   0   72.80    3.18
  -1  -9   0   73.00    3.16
   1  -9   0   73.82    3.19
   1  -9   0   69.81    3.16
  -1  -9   0   73.06    3.19
  -1  -9   0   72.75    3.16
   1  -9   0   72.34    3.17
   1  -9   0   74.57    3.18
   1  -9   0   71.64    3.19
  -1  -9   0   73.65    3.18
  -1   9   0   72.08    3.17
   1   9   0   70.68    3.18
   1   9   0   70.74    3.17
  -1   9   0   70.89    3.17
   1   9   0   74.12    3.19
  -1   9   0   73.58    3.18
  -1   9   0   73.82    3.19
   1   9   0   71.97    3.17
   1   9   0   71.04    3.16
   3  -9   0    7.15    0.34
  -3  -9   0    6.86    0.39
   3  -9   0    7.82    0.40
   3  -9   0    7.73    0.35
  -3  -9   0    6.78    0.34
   3  -9   0    6.93    0.39
  -3  -9   0    7.00    0.34
   3  -9   0    7.30    0.36
  -3  -9   0    7.10    0.37
  -3  -9   0    7.05    0.38
  -3   9   0    6.92    0.35
   3   9   0    7.35    0.39
   3   9   0    7.39    0.36
   3   9   0    6.70    0.37
  -3   9   0    7.26    0.36
   3   9   0    7.25    0.35
  -3   9   0    7.23    0.39
   5  -9   0    4.13    0.26
  -5  -9   0    4.33    0.27
   5  -9   0    4.34    0.31
  -5  -9   0    4.50    0.22
   5  -9   0    4.05    0.30
  -5  -9   0    4.53    0.29
   5  -9   0    4.17    0.23
   5  -9   0    4.26    0.24
  -5  -9   0    4.53    0.24
  -5   9   0    4.15    0.24
   5   9   0    4.50    0.30
   5   9   0    4.27    0.26
  -5   9   0    3.74    0.29
  -5   9   0    4.23    0.26
   5   9   0    4.59    0.23
   7  -9   0   16.78    0.83
  -7  -9   0   16.96    0.78
  -7  -9   0   17.03    0.75
  -7  -9   0   15.90    0.80
  -7  -9   0   18.17    0.82
   7  -9   0   15.85    0.82
  -7  -9   0   17.44    0.81
   7  -9   0   16.99    0.77
   7  -9   0   16.76    0.79
  -7   9   0   17.30    0.79
  -7   9   0   17.34    0.77
   7   9   0   16.57    0.80
   7   9   0   15.68    0.79
  -7   9   0   17.44    0.82
   7   9   0   17.02    0.82
  -7   9   0   17.08    0.79
  -9  -9   0   63.56    2.86
  -9  -9   0   66.64    2.86
  -9  -9   0   63.07    2.80
   9  -9   0   68.92    2.84
  -9  -9   0   62.61    2.84
   9  -9   0   64.85    2.93
  -9  -9   0   63.76    2.80
   9  -9   0   65.12    2.85
  -9   9   0   64.32    2.87
  -9   9   0   62.93    2.82
   9   9   0   65.62    2.84
  -9   9   0   62.88    2.83
   9   9   0   66.13    2.86
  -9   9   0   64.17    2.85
   9   9   0   61.61    2.87
  11  -9   0   11.74    0.66
 -11  -9   0   12.36    0.64
  11  -9   0   12.08    0.62
 -11  -9   0   12.63    0.68
  11  -9   0   12.37    0.72
 -11  -9   0   13.49    0.70
 -11   9   0   12.35    0.69
 -11   9   0   12.48    0.60
  11   9   0   13.60    0.68
 -11   9   0   12.51    0.62
  11   9   0   12.70    0.66
 -11   9   0   12.80    0.64
  11   9   0   13.08    0.72
  13  -9   0    1.20    0.25
 -13  -9   0    1.02    0.30
  13  -9   0    1.46    0.46
 -13  -9   0    1.19    0.24
 -13   9   0    2.26    0.28
  13   9   0    1.15    0.27
 -13   9   0    1.10    0.28
 -13   9   0    1.62    0.35
  13   9   0    1.21    0.39
 -13   9   0    1.60    0.26
 -13   9   0    1.35    0.20
 -15  -9   0    0.84    0.30
  15  -9   0    0.91    0.57
 -15  -9   0    0.54    0.41
  15  -9   0    1.08    0.33
 -15   9   0    1.21    0.33
 -15   9   0    0.58    0.41
  15   9   0    0.91    0.34
 -15   9   0    1.16    0.30
 -15   9   0    0.84    0.34
  15   9   0    0.70    0.52
 -15   9   0    1.00    0.22
   0 -10   0    1.69    0.13
   0 -10   0    2.12    0.20
   0 -10   0    1.65    0.16
   0 -10   0    1.65    0.22
   0  10   0    1.91    0.23
   0  10   0    2.15    0.20
   0  10   0    1.71    0.16
   0  10   0    1.47    0.16
   0  10   0    1.97    0.17
   2 -10   0    9.38    0.42
   2 -10   0    9.13    0.46
  -2 -10   0    9.43    0.43
  -2 -10   0    9.07    0.44
  -2 -10   0    9.20    0.47
   2 -10   0    9.27    0.45
  -2 -10   0    9.55    0.48
  -2 -10   0    9.67    0.47
   2 -10   0    9.64    0.48
   2 -10   0   10.14    0.49
   2  10   0    8.94    0.49
  -2  10   0    8.72    0.45
   2  10   0    8.92    0.48
   2  10   0    8.51    0.44
   2  10   0    9.25    0.45
   2  10   0    8.97    0.44
  -2  10   0    8.56    0.49
  -2  10   0    8.90    0.47
  -2  10   0    8.54    0.44
   4 -10   0   10.29    0.46
  -4 -10   0    9.55    0.50
   4 -10   0   10.23    0.52
  -4 -10   0    9.86    0.46
  -4 -10   0    9.68    0.51
   4 -10   0   10.57    0.49
   4 -10   0    9.61    0.47
  -4 -10   0    9.69    0.51
  -4 -10   0    9.87    0.47
   4 -10   0    9.86    0.52
   4  10   0    9.72    0.48
   4  10   0    9.16    0.49
  -4  10   0    9.54    0.47
   4  10   0   10.02    0.52
  -4  10   0   10.01    0.49
  -4  10   0   10.13    0.52
   4  10   0    9.84    0.47
   6 -10   0    2.00    0.18
   6 -10   0    2.29    0.26
   6 -10   0    2.39    0.23
  -6 -10   0    2.21    0.29
  -6 -10   0    1.94    0.17
  -6 -10   0    1.69    0.23
   6 -10   0    2.36    0.17
  -6 -10   0    1.90    0.26
   6 -10   0    2.21    0.27
  -6 -10   0    1.94    0.14
   6  10   0    1.84    0.15
  -6  10   0    2.14    0.18
  -6  10   0    2.15    0.27
   6  10   0    2.54    0.26
   6  10   0    2.10    0.21
  -6  10   0    2.03    0.23
   6  10   0    1.56    0.21
  -6  10   0    2.03    0.20
  -8 -10   0    2.97    0.16
  -8 -10   0    2.26    0.23
   8 -10   0    3.07    0.39
   8 -10   0    2.71    0.22
   8 -10   0    2.22    0.27
  -8 -10   0    2.75    0.33
  -8 -10   0    2.26    0.29
   8 -10   0    2.56    0.32
  -8 -10   0    3.64    0.35
  -8  10   0    2.83    0.21
   8  10   0    2.95    0.33
  -8  10   0    2.59    0.26
  -8  10   0    3.05    0.32
   8  10   0    2.87    0.27
  -8  10   0    2.90    0.24
   8  10   0    3.02    0.28
  10 -10   0    5.24    0.48
  10 -10   0    6.03    0.47
 -10 -10   0    5.59    0.41
  10 -10   0    5.50    0.40
 -10 -10   0    4.82    0.46
 -10 -10   0    6.13    0.49
  10 -10   0    5.57    0.34
 -10 -10   0    6.00    0.36
  10  10   0    5.77    0.47
 -10  10   0    4.88    0.31
 -10  10   0    5.83    0.51
  10  10   0    5.33    0.59
 -10  10   0    5.33    0.36
  10  10   0    5.42    0.39
 -10  10   0    4.63    0.35
  12 -10   0   10.29    0.73
  12 -10   0   10.30    0.57
 -12 -10   0    9.41    0.57
 -12 -10   0   10.98    0.63
 -12  10   0    9.56    0.57
 -12  10   0   10.50    0.55
  12  10   0   10.91    0.62
 -12  10   0   10.82    0.66
 -12  10   0   10.94    0.59
  12  10   0    9.94    0.71
  14 -10   0   19.74    1.15
 -14 -10   0   17.71    0.93
 -14 -10   0   18.38    1.00
  14 -10   0   17.71    0.92
 -14  10   0   18.00    0.88
 -14  10   0   18.10    0.93
  14  10   0   18.00    1.08
  14  10   0   19.21    0.98
 -14  10   0   19.15    1.03
   1 -11   0    0.24    0.13
   1 -11   0    0.36    0.15
  -1 -11   0    0.38    0.16
   1 -11   0    0.15    0.18
  -1 -11   0    0.48    0.08
   1 -11   0    0.67    0.17
  -1 -11   0    0.32    0.19
  -1 -11   0    0.22    0.13
   1 -11   0    0.41    0.08
   1  11   0    0.63    0.12
  -1  11   0    0.37    0.12
   1  11   0    0.36    0.12
   1  11   0    0.46    0.17
   1  11   0    0.70    0.17
  -1  11   0    0.48    0.19
   1  11   0    0.51    0.12
  -1  11   0    0.10    0.12
  -3 -11   0    0.21    0.17
   3 -11   0    0.29    0.11
  -3 -11   0    0.26    0.09
   3 -11   0    0.15    0.08
  -3 -11   0    0.36    0.16
   3 -11   0    0.18    0.14
  -3 -11   0    0.28    0.11
   3 -11   0    0.21    0.15
  -3 -11   0    0.21    0.18
   3 -11   0    0.33    0.20
  -3  11   0    0.60    0.18
  -3  11   0    0.29    0.11
   3  11   0    0.17    0.13
   3  11   0    0.13    0.12
  -3  11   0    0.18    0.12
   3  11   0    0.34    0.18
   3  11   0    0.45    0.12
  -5 -11   0    1.97    0.25
   5 -11   0    1.60    0.20
   5 -11   0    1.55    0.23
   5 -11   0    1.02    0.14
   5 -11   0    1.40    0.38
  -5 -11   0    1.48    0.21
  -5 -11   0    1.09    0.14
  -5 -11   0    1.69    0.23
   5 -11   0    1.12    0.15
  -5 -11   0    1.33    0.16
   5  11   0    1.38    0.23
  -5  11   0    1.01    0.17
   5  11   0    1.33    0.18
   5  11   0    1.22    0.17
  -5  11   0    1.67    0.17
   5  11   0    1.22    0.14
  -5  11   0    1.02    0.23
  -7 -11   0    4.68    0.30
  -7 -11   0    5.20    0.26
   7 -11   0    4.66    0.42
   7 -11   0    5.17    0.29
   7 -11   0    5.35    0.30
  -7 -11   0    5.31    0.40
  -7 -11   0    4.60    0.40
  -7 -11   0    4.54    0.35
   7 -11   0    4.94    0.36
  -7  11   0    5.63    0.29
   7  11   0    4.62    0.40
  -7  11   0    5.15    0.35
   7  11   0    4.84    0.33
   7  11   0    4.67    0.34
  -7  11   0    4.89    0.33
  -7  11   0    5.54    0.43
   7  11   0    4.60    0.27
   9 -11   0    0.84    0.32
  -9 -11   0    0.50    0.31
  -9 -11   0    0.41    0.16
  -9 -11   0    0.64    0.08
   9 -11   0    0.39    0.26
   9 -11   0    0.52    0.20
  -9 -11   0    0.71    0.23
  -9 -11   0    0.83    0.31
   9 -11   0    0.65    0.26
   9  11   0    0.57    0.28
  -9  11   0    0.63    0.19
  -9  11   0    0.35    0.19
   9  11   0    0.59    0.19
  -9  11   0    0.66    0.25
   9  11   0    0.88    0.23
  11 -11   0    2.41    0.38
 -11 -11   0    1.86    0.40
  11 -11   0    2.72    0.30
  11 -11   0    3.06    0.47
 -11 -11   0    2.14    0.32
 -11  11   0    2.98    0.42
  11  11   0    2.22    0.35
  11  11   0    2.43    0.34
 -11  11   0    2.59    0.31
  11  11   0    2.59    0.40
 -11  11   0    2.56    0.29
  13 -11   0    4.43    0.62
 -13 -11   0    4.75    0.54
 -13 -11   0    3.62    0.41
  13 -11   0    4.66    0.42
  13 -11   0    4.74    0.62
  13  11   0    3.38    0.56
 -13  11   0    4.76    0.44
 -13  11   0    4.59    0.58
  13  11   0    4.24    0.49
 -13  11   0    4.77    0.39
   0 -12   0    1.76    0.22
   0 -12   0    2.42    0.26
   0 -12   0    1.96    0.25
   0 -12   0    1.70    0.14
   0 -12   0    1.61    0.19
   0  12   0    2.23    0.25
   0  12   0    1.98    0.25
   0  12   0    1.63    0.19
   0  12   0    1.64    0.19
   0  12   0    1.68    0.19
  -2 -12   0   26.06    1.19
   2 -12   0   25.55    1.19
  -2 -12   0   25.04    1.19
  -2 -12   0   24.28    1.19
   2 -12   0   25.09    1.20
   2 -12   0   26.78    1.18
   2 -12   0   25.71    1.16
  -2 -12   0   25.71    1.14
   2 -12   0   25.56    1.14
  -2 -12   0   26.63    1.15
   2  12   0   24.51    1.17
   2  12   0   24.77    1.16
  -2  12   0   25.87    1.16
  -2  12   0   26.21    1.19
   2  12   0   24.76    1.15
   2  12   0   25.55    1.21
  -2  12   0   26.64    1.21
  -2  12   0   25.87    1.16
   4 -12   0   55.30    2.38
   4 -12   0   53.67    2.43
   4 -12   0   54.02    2.40
  -4 -12   0   51.71    2.38
  -4 -12   0   54.64    2.42
  -4 -12   0   53.21    2.38
   4 -12   0   55.04    2.43
  -4 -12   0   54.90    2.42
  -4 -12   0   55.93    2.43
   4 -12   0   54.91    2.38
  -4  12   0   55.64    2.43
   4  12   0   51.64    2.39
   4  12   0   52.59    2.43
  -4  12   0   52.75    2.39
   4  12   0   55.76    2.39
  -4  12   0   53.36    2.40
   4  12   0   56.96    2.41
   6 -12   0    2.85    0.22
  -6 -12   0    2.78    0.36
   6 -12   0    3.10    0.21
  -6 -12   0    2.76    0.30
  -6 -12   0    2.22    0.19
   6 -12   0    2.37    0.32
   6 -12   0    2.24    0.30
  -6 -12   0    2.81    0.22
   6 -12   0    2.31    0.33
  -6 -12   0    2.70    0.32
   6  12   0    2.72    0.37
  -6  12   0    2.72    0.23
   6  12   0    2.50    0.20
   6  12   0    2.43    0.27
  -6  12   0    2.96    0.32
   6  12   0    3.17    0.29
  -6  12   0    2.30    0.25
   8 -12   0    0.33    0.15
   8 -12   0    0.64    0.27
  -8 -12   0    0.94    0.30
  -8 -12   0    0.91    0.26
  -8 -12   0    0.80    0.11
  -8 -12   0    0.62    0.30
   8 -12   0    0.46    0.15
  -8 -12   0    0.51    0.17
   8 -12   0    0.49    0.31
   8 -12   0    0.36    0.25
  -8  12   0    0.59    0.20
  -8  12   0    0.22    0.25
  -8  12   0    0.57    0.22
   8  12   0    0.66    0.30
  -8  12   0    0.65    0.15
   8  12   0    0.23    0.22
   8  12   0    0.84    0.21
  10 -12   0    7.47    0.42
 -10 -12   0    7.10    0.44
 -10 -12   0    7.27    0.33
 -10 -12   0    7.50    0.34
  10 -12   0    7.05    0.63
  10 -12   0    5.91    0.55
 -10 -12   0    7.61    0.61
 -10 -12   0    7.67    0.52
  10  12   0    6.89    0.48
 -10  12   0    6.32    0.46
 -10  12   0    7.53    0.56
 -10  12   0    7.45    0.47
 -10  12   0    7.42    0.40
  10  12   0    7.73    0.54
  10  12   0    6.56    0.58
  12 -12   0   12.80    0.82
  12 -12   0   13.35    0.88
  12 -12   0   11.97    0.65
 -12 -12   0   12.92    0.77
 -12 -12   0   11.56    0.68
 -12  12   0   13.16    0.81
 -12  12   0   11.76    0.61
  12  12   0   11.91    0.73
 -12  12   0   12.38    0.66
  12  12   0   11.77    0.84
 -12  12   0   11.53    0.67
   1 -13   0    7.71    0.46
  -1 -13   0    7.86    0.50
  -1 -13   0    7.36    0.48
   1 -13   0    7.26    0.50
  -1 -13   0    7.56    0.37
   1 -13   0    7.54    0.42
  -1 -13   0    7.21    0.41
   1 -13   0    7.42    0.46
   1 -13   0    7.60    0.37
  -1 -13   0    6.89    0.45
   1  13   0    7.38    0.41
  -1  13   0    7.96    0.41
  -1  13   0    7.64    0.41
   1  13   0    7.79    0.45
   1  13   0    7.49    0.41
  -1  13   0    6.89    0.50
   1  13   0    7.58    0.41
   1  13   0    8.03    0.51
  -1  13   0    7.41    0.46
   3 -13   0   39.07    1.84
  -3 -13   0   40.30    1.79
  -3 -13   0   38.48    1.85
  -3 -13   0   42.02    1.84
  -3 -13   0   41.25    1.80
   3 -13   0   41.75    1.86
   3 -13   0   42.25    1.82
   3 -13   0   40.94    1.80
   3 -13   0   40.50    1.79
  -3 -13   0   40.80    1.84
   3  13   0   38.75    1.85
  -3  13   0   41.30    1.81
   3  13   0   39.78    1.81
   3  13   0   41.34    1.83
   3  13   0   40.80    1.81
  -3  13   0   40.54    1.82
  -3  13   0   40.35    1.84
   5 -13   0    3.91    0.24
  -5 -13   0    4.38    0.26
  -5 -13   0    4.34    0.46
  -5 -13   0    3.10    0.41
   5 -13   0    3.86    0.37
   5 -13   0    3.68    0.32
  -5 -13   0    3.35    0.34
   5 -13   0    3.73    0.26
   5 -13   0    3.54    0.42
  -5 -13   0    4.08    0.26
   5  13   0    4.04    0.32
  -5  13   0    3.74    0.27
   5  13   0    4.01    0.42
   5  13   0    3.11    0.31
  -5  13   0    4.25    0.30
   5  13   0    3.43    0.26
  -5  13   0    4.25    0.38
   7 -13   0   20.89    0.96
  -7 -13   0   20.89    0.94
   7 -13   0   20.88    0.96
  -7 -13   0   21.20    1.04
  -7 -13   0   19.20    1.05
   7 -13   0   21.43    1.08
  -7 -13   0   21.66    1.02
  -7 -13   0   20.49    0.97
   7 -13   0   22.97    1.06
   7 -13   0   22.04    1.02
  -7  13   0   21.41    1.04
   7  13   0   21.16    1.01
   7  13   0   20.72    0.95
  -7  13   0   19.85    0.96
   7  13   0   20.82    1.00
   7  13   0   20.25    1.06
  -7  13   0   20.19    0.99
  -7  13   0   21.16    1.01
   9 -13   0    2.23    0.38
  -9 -13   0    2.63    0.33
   9 -13   0    2.34    0.28
   9 -13   0    2.13    0.45
  -9 -13   0    2.87    0.43
   9 -13   0    2.26    0.28
  -9 -13   0    2.22    0.18
  -9 -13   0    2.57    0.26
   9  13   0    1.86    0.40
  -9  13   0    2.86    0.31
  -9  13   0    2.60    0.30
   9  13   0    1.81    0.28
  -9  13   0    2.88    0.26
  -9  13   0    2.82    0.38
   9  13   0    1.96    0.33
 -11 -13   0    7.03    0.57
  11 -13   0    6.59    0.47
  11 -13   0    6.57    0.46
 -11 -13   0    7.11    0.47
  11 -13   0    7.43    0.74
  11 -13   0    7.61    0.65
 -11  13   0    7.33    0.64
  11  13   0    7.96    0.55
 -11  13   0    7.61    0.49
 -11  13   0    6.68    0.42
  11  13   0    5.62    0.70
  13 -13   0    9.05    0.84
 -13 -13   0    8.78    0.62
 -13 -13   0    9.78    0.76
  13 -13   0    8.69    1.05
  13 -13   0    8.91    0.61
  13  13   0    8.63    0.67
  13  13   0    9.62    0.94
 -13  13   0    8.95    0.80
 -13  13   0   10.11    0.59
 -13  13   0    9.48    0.64
 -13  13   0    9.78    0.52
   0 -14   0   32.04    1.43
   0 -14   0   29.85    1.48
   0 -14   0   31.78    1.47
   0 -14   0   31.70    1.40
   0 -14   0   30.72    1.46
   0  14   0   33.26    1.44
   0  14   0   31.88    1.49
   0  14   0   30.58    1.46
   0  14   0   32.52    1.44
  -2 -14   0    1.90    0.27
  -2 -14   0    1.24    0.29
  -2 -14   0    1.23    0.31
  -2 -14   0    1.30    0.17
   2 -14   0    0.91    0.25
   2 -14   0    1.56    0.32
   2 -14   0    1.25    0.23
  -2 -14   0    1.71    0.21
  -2  14   0    1.17    0.19
   2  14   0    1.47    0.31
   2  14   0    1.11    0.21
   2  14   0    1.29    0.20
  -2  14   0    1.23    0.21
   2  14   0    0.99    0.19
  -2  14   0    1.53    0.25
   4 -14   0    8.20    0.58
  -4 -14   0    8.71    0.44
   4 -14   0    8.44    0.41
  -4 -14   0    8.14    0.55
  -4 -14   0    8.11    0.58
   4 -14   0    8.82    0.52
   4 -14   0    9.27    0.54
  -4 -14   0    7.60    0.50
  -4 -14   0    8.63    0.43
   4 -14   0    8.52    0.44
  -4  14   0    8.74    0.45
   4  14   0    7.73    0.44
   4  14   0    7.86    0.48
  -4  14   0    8.71    0.54
  -4  14   0    7.92    0.48
   4  14   0    7.31    0.57
   4  14   0    8.01    0.48
   6 -14   0    0.47    0.28
  -6 -14   0    0.40    0.35
   6 -14   0    0.33    0.28
  -6 -14   0    1.07    0.36
  -6 -14   0    0.53    0.24
   6 -14   0    0.55    0.17
   6 -14   0    0.68    0.35
  -6 -14   0    0.26    0.15
  -6 -14   0    0.48    0.25
  -6  14   0    0.59    0.27
   6  14   0    0.46    0.25
  -6  14   0    0.56    0.31
   6  14   0    0.37    0.15
  -6  14   0    0.64    0.27
   6  14   0    0.67    0.36
  -6  14   0    0.75    0.18
   6  14   0    0.58    0.33
  -8 -14   0    0.03    0.14
   8 -14   0    0.38    0.16
   8 -14   0    0.47    0.33
  -8 -14   0    0.25    0.43
   8 -14   0    0.40    0.42
  -8 -14   0    0.15    0.17
  -8 -14   0    0.66    0.30
   8  14   0    0.14    0.14
  -8  14   0    0.17    0.32
   8  14   0   -0.05    0.23
  -8  14   0    0.38    0.30
  -8  14   0    0.30    0.23
   8  14   0    0.11    0.38
   8  14   0    0.31    0.31
  -8  14   0    0.18    0.17
 -10 -14   0    5.68    0.57
  10 -14   0    5.49    0.73
  10 -14   0    6.45    0.63
  10 -14   0    6.11    0.41
  10 -14   0    5.35    0.41
 -10 -14   0    6.33    0.44
 -10 -14   0    5.48    0.30
 -10  14   0    5.51    0.38
 -10  14   0    6.20    0.52
 -10  14   0    6.53    0.46
  10  14   0    6.20    0.67
  10  14   0    6.45    0.51
 -10  14   0    5.68    0.61
 -12 -14   0    5.31    0.62
  12 -14   0    5.16    0.45
 -12 -14   0    4.84    0.48
  12 -14   0    5.87    0.65
  12 -14   0    4.95    0.76
  12 -14   0    5.08    0.47
  12  14   0    5.27    0.55
  12  14   0    5.16    0.70
 -12  14   0    4.91    0.38
 -12  14   0    5.75    0.53
 -12  14   0    5.17    0.67
 -12  14   0    5.19    0.63
  -1 -15   0    9.64    0.66
   1 -15   0    9.33    0.60
  -1 -15   0    8.95    0.52
   1 -15   0    9.00    0.58
  -1 -15   0   10.08    0.47
   1 -15   0   10.30    0.67
  -1 -15   0    9.55    0.57
  -1 -15   0   10.09    0.66
   1 -15   0    9.25    0.54
   1 -15   0    9.69    0.47
   1  15   0   10.20    0.91
  -1  15   0   10.66    0.53
  -1  15   0    8.75    0.66
  -1  15   0   10.78    0.59
   1  15   0    8.41    0.53
   1  15   0    9.76    0.53
  -1  15   0    9.84    0.53
   1  15   0    9.02    0.52
   1  15   0    9.35    0.59
  -3 -15   0   28.68    1.27
  -3 -15   0   28.98    1.29
   3 -15   0   28.76    1.35
   3 -15   0   27.60    1.32
  -3 -15   0   29.00    1.36
   3 -15   0   27.51    1.38
  -3 -15   0   29.69    1.34
   3 -15   0   26.78    1.26
   3 -15   0   27.84    1.28
  -3 -15   0   26.76    1.38
   3  15   0   27.64    1.32
  -3  15   0   29.47    1.35
  -3  15   0   28.99    1.30
  -3  15   0   28.23    1.31
   3  15   0   28.86    1.30
   3  15   0   27.76    1.31
   3  15   0   28.35    1.39
   5 -15   0    0.61    0.39
  -5 -15   0    0.09    0.19
   5 -15   0    0.26    0.19
   5 -15   0    0.51    0.30
   5 -15   0    0.18    0.17
  -5 -15   0    0.22    0.27
  -5 -15   0    0.00    0.15
  -5 -15   0    0.06    0.38
  -5  15   0    0.15    0.18
   5  15   0    0.44    0.27
   5  15   0    0.31    0.44
  -5  15   0    0.23    0.29
   5  15   0    0.07    0.17
   5  15   0    0.24    0.22
  -5  15   0    0.12    0.22
   7 -15   0   -0.14    0.33
  -7 -15   0    0.41    0.19
   7 -15   0    0.25    0.15
   7 -15   0    0.07    0.46
  -7 -15   0    0.32    0.30
  -7 -15   0    0.33    0.43
   7 -15   0    0.08    0.19
  -7  15   0    0.06    0.24
   7  15   0    0.18    0.32
   7  15   0    0.49    0.45
   7  15   0    0.03    0.24
   7  15   0    0.19    0.17
  -7  15   0    0.16    0.19
  -7  15   0    0.03    0.34
  -7  15   0    0.22    0.33
   9 -15   0    0.28    0.62
  -9 -15   0    0.12    0.15
  -9 -15   0    0.59    0.35
   9 -15   0    0.49    0.43
  -9 -15   0    0.51    0.24
   9 -15   0    0.41    0.22
   9 -15   0    0.54    0.19
  -9  15   0    0.22    0.21
  -9  15   0    0.54    0.29
   9  15   0    0.23    0.28
  -9  15   0    0.50    0.39
   9  15   0    0.58    0.49
  -9  15   0    0.42    0.34
   0 -16   0   10.24    0.65
   0 -16   0   10.91    0.53
   0 -16   0   11.79    0.81
   0 -16   0   11.51    0.72
   0  16   0   11.25    0.60
   0  16   0   10.55    0.66
   0  16   0   11.02    0.59
   0  16   0   10.21    0.75
   2 -16   0    1.13    0.15
   2 -16   0    1.23    0.32
  -2 -16   0    0.96    0.26
  -2 -16   0    0.88    0.30
   2 -16   0    1.04    0.30
  -2 -16   0    0.97    0.39
  -2 -16   0    1.25    0.16
  -2 -16   0    0.90    0.41
   2 -16   0    0.88    0.41
   2  16   0    0.70    0.27
  -2  16   0    0.93    0.25
  -2  16   0    0.04    0.29
   2  16   0    1.49    0.25
   2  16   0    1.10    0.45
  -2  16   0    1.01    0.22
   2  16   0    0.85    0.25
   4 -16   0    0.21    0.13
  -4 -16   0    0.02    0.23
   4 -16   0    0.13    0.19
  -4 -16   0    0.19    0.16
   4 -16   0   -0.13    0.31
  -4 -16   0   -0.06    0.42
  -4 -16   0    0.15    0.29
   4 -16   0   -0.05    0.48
   4  16   0    0.25    0.45
   4  16   0    0.09    0.22
   4  16   0    0.18    0.29
   4  16   0    0.11    0.20
  -4  16   0    0.07    0.24
  -4  16   0   -0.16    0.29
  -4  16   0   -0.06    0.20
  -6 -16   0    2.01    0.24
  -6 -16   0    1.46    0.35
   6 -16   0    2.25    0.23
   6 -16   0    2.06    0.39
  -6 -16   0    1.87    0.24
   6 -16   0    2.17    0.24
   6 -16   0    2.24    0.57
   6  16   0    1.81    0.29
  -6  16   0    2.36    0.26
  -6  16   0    1.52    0.39
  -6  16   0    1.76    0.39
   6  16   0    2.36    0.30
   6  16   0    1.78    0.48
  -6  16   0    3.04    0.34
   8 -16   0    5.10    0.34
   8 -16   0    4.50    0.66
  -8 -16   0    4.71    0.56
  -8 -16   0    4.35    0.39
   8 -16   0    4.42    0.61
  -8  16   0    4.66    0.61
  -8  16   0    4.57    0.47
   8  16   0    4.93    0.47
   8  16   0    5.28    0.68
  -8  16   0    5.05    0.59
  -8  16   0    5.32    0.39
   8  16   0    4.49    0.36
  -1 -17   0    0.26    0.15
   1 -17   0    0.13    0.34
   1 -17   0    0.36    0.14
  -1 -17   0    0.41    0.47
   1 -17   0    0.17    0.38
  -1 -17   0   -0.03    0.29
   1 -17   0   -0.20    0.47
  -1 -17   0    0.32    0.33
   1  17   0   -0.07    0.50
  -1  17   0    0.03    0.39
  -1  17   0    0.26    0.49
  -1  17   0   -0.07    0.33
   1  17   0    0.30    0.24
  -1  17   0    0.05    0.22
   1  17   0    0.16    0.24
   3 -17   0    6.86    0.37
  -3 -17   0    7.42    0.58
  -3 -17   0    6.08    0.49
   3 -17   0    6.38    0.59
  -3 -17   0    9.39    1.13
   3 -17   0    6.20    0.74
  -3 -17   0    6.82    0.40
  -3  17   0    6.18    0.50
   3  17   0    6.62    0.79
   3  17   0    6.30    0.57
  -3  17   0    6.64    0.46
   3  17   0    7.74    0.50
   3  17   0    6.88    0.47
  -3  17   0    7.10    0.59
  -5 -17   0    0.92    0.21
   5 -17   0    1.11    0.25
   5 -17   0    0.63    0.56
  -5 -17   0    0.75    0.37
   5 -17   0    1.36    0.40
  -5 -17   0    0.87    0.27
   5 -17   0    0.95    0.16
  -5  17   0    1.04    0.32
  -5  17   0    0.44    0.41
   5  17   0    1.16    0.29
   5  17   0    0.96    0.26
  -5  17   0    1.19    0.25
   5  17   0    1.10    0.54
   7 -17   0    2.94    0.50
  -7 -17   0    3.16    0.45
   7 -17   0    3.05    0.28
  -7 -17   0    3.13    0.45
   7 -17   0    4.48    0.98
  -7 -17   0    3.10    0.36
  -7  17   0    2.79    0.48
   7  17   0    2.59    0.38
   7  17   0    2.88    0.36
  -7  17   0    3.66    0.52
   7  17   0    2.85    0.63
   7  17   0    4.42    0.85
  -7  17   0    3.37    0.41
  -7  17   0    3.03    0.37
   0 -18   0    2.02    0.25
   0  18   0    1.96    0.33
   0  18   0    1.72    0.63
   0  18   0    1.33    0.30
  -2 -18   0    3.26    0.30
  -2 -18   0    3.14    0.40
   2 -18   0    3.05    0.46
   2 -18   0    3.18    0.27
   2 -18   0    2.88    0.34
  -2 -18   0    3.98    0.49
   2  18   0    3.34    0.41
  -2  18   0    3.23    0.40
  -2  18   0    3.42    0.42
   2  18   0    3.84    0.44
   2  18   0    3.32    0.64
   2  18   0    3.34    0.42
  -2  18   0    3.47    0.47
  -4 -18   0    4.49    0.38
  -4 -18   0    4.52    0.56
   4 -18   0    4.80    0.63
  -4 -18   0    4.63    0.58
   4 -18   0    4.88    0.32
  -4  18   0    6.58    0.62
   4  18   0    4.42    0.55
  -4  18   0    5.23    0.49
  -4  18   0    4.53    0.44
   4  18   0    4.48    0.49
   4  18   0    4.58    0.44
   4  18   0    4.85    0.70
  18   0  -1    0.15    0.29
  18   0  -1    0.00    0.32
 -18   0   1    0.09    0.35
  18   0  -1    0.13    0.52
 -18   0   1   -0.08    0.35
 -18   0   1    0.08    0.43
 -18   0   1    0.08    0.21
 -16   0   1   -0.13    0.24
  16   0  -1    0.24    0.35
  16   0  -1    0.09    0.20
 -16   0   1   -0.03    0.32
  16   0  -1    0.20    0.23
 -16   0   1    0.08    0.16
 -16   0   1    0.06    0.26
 -14   0   1    0.41    0.13
 -14   0   1    0.87    0.26
  14   0  -1    0.84    0.23
  14   0  -1    0.23    0.26
 -14   0   1    0.61    0.18
  14   0  -1    0.44    0.18
 -14   0   1    0.73    0.21
  14   0  -1    0.53    0.15
  12   0  -1    0.15    0.11
 -12   0   1   -0.09    0.18
 -12   0   1    0.00    0.09
 -12   0   1    0.23    0.13
  12   0  -1    0.04    0.13
 -12   0   1   -0.03    0.15
  12   0  -1   -0.08    0.18
  12   0  -1    0.10    0.15
  10   0  -1    0.19    0.07
  10   0  -1    0.25    0.11
 -10   0   1   -0.01    0.12
  10   0  -1    0.22    0.10
 -10   0   1    0.32    0.09
 -10   0   1    0.25    0.07
  10   0  -1    0.09    0.13
   8   0  -1    0.44    0.09
  -8   0   1    0.37    0.06
   8   0  -1    0.40    0.11
   8   0  -1    0.52    0.08
   8   0  -1    0.58    0.07
  -8   0   1    0.41    0.07
  -8   0   1    0.54    0.10
  -8   0   1    0.53    0.10
  -6   0   1    1.30    0.09
   6   0  -1    1.28    0.09
  -6   0   1    1.14    0.08
   6   0  -1    1.37    0.12
  -6   0   1    1.20    0.11
  -6   0   1    1.62    0.11
   6   0  -1    1.39    0.08
   6   0  -1    1.62    0.11
   4   0  -1    0.06    0.02
  -4   0   1    0.01    0.03
   4   0  -1    0.02    0.04
  -4   0   1    0.06    0.03
   4   0  -1   -0.06    0.04
  -4   0   1    0.08    0.04
   4   0  -1    0.02    0.03
  -2   0   1    0.06    0.02
   2   0  -1    0.05    0.02
  -2   0   1    0.02    0.02
  -2   0   1   -0.01    0.02
   2   0  -1    0.06    0.02
   0   0   1   -0.66    0.02
   0   0  -1   -0.62    0.01
   0   0  -1   -0.57    0.01
  -2   0  -1   -0.11    0.02
   2   0   1   -0.09    0.03
  -2   0  -1   -0.06    0.02
  -2   0  -1   -0.15    0.03
   2   0   1   -0.04    0.03
   2   0   1   -0.11    0.02
  -2   0  -1   -0.11    0.03
  -4   0  -1    0.03    0.05
   4   0   1    0.13    0.04
  -4   0  -1    0.04    0.06
   4   0   1    0.07    0.06
   4   0   1    0.17    0.04
  -4   0  -1    0.20    0.04
   4   0   1    0.02    0.05
   6   0   1    2.99    0.17
   6   0   1    3.48    0.18
  -6   0  -1    3.28    0.18
   6   0   1    3.02    0.19
  -6   0  -1    3.08    0.19
  -6   0  -1    3.53    0.20
   6   0   1    3.47    0.20
  -6   0  -1    3.26    0.17
  -8   0  -1    0.13    0.07
  -8   0  -1    0.18    0.13
  -8   0  -1   -0.06    0.08
   8   0   1    0.20    0.12
   8   0   1    0.06    0.07
   8   0   1    0.03    0.08
  -8   0  -1   -0.04    0.09
   8   0   1    0.12    0.10
 -10   0  -1    0.68    0.14
 -10   0  -1    0.63    0.12
  10   0   1    0.61    0.13
  10   0   1    0.40    0.11
  10   0   1    0.77    0.15
  10   0   1    0.53    0.18
 -10   0  -1    0.52    0.17
 -10   0  -1    0.29    0.10
  12   0   1    0.13    0.22
  12   0   1    0.01    0.14
 -12   0  -1    0.00    0.10
 -12   0  -1   -0.11    0.20
  12   0   1    0.00    0.17
 -12   0  -1   -0.06    0.17
  12   0   1   -0.03    0.16
 -12   0  -1   -0.07    0.15
  14   0   1   -0.25    0.24
  14   0   1   -0.13    0.22
  14   0   1   -0.14    0.31
 -14   0  -1   -0.11    0.28
 -14   0  -1   -0.19    0.13
  14   0   1   -0.02    0.19
 -14   0  -1   -0.16    0.21
 -14   0  -1   -0.14    0.20
 -16   0  -1   -0.26    0.18
  16   0   1   -0.21    0.45
 -16   0  -1    0.30    0.30
  16   0   1    0.08    0.30
 -16   0  -1    0.07    0.30
  17  -1  -1    1.08    0.29
  17  -1  -1    0.73    0.27
 -17  -1   1    1.43    0.19
 -17  -1   1    0.93    0.32
 -17  -1   1    0.84    0.40
 -17  -1   1    1.00    0.33
  17   1  -1    1.41    0.48
 -17   1   1    1.20    0.28
 -17   1   1    1.16    0.39
  17   1  -1    1.06    0.29
 -17   1   1    0.84    0.21
 -17   1   1    0.83    0.33
  15  -1  -1    3.62    0.33
 -15  -1   1    3.24    0.34
 -15  -1   1    3.23    0.25
  15  -1  -1    3.12    0.38
  15  -1  -1    3.37    0.30
  15  -1  -1    3.91    0.44
 -15  -1   1    3.71    0.40
 -15   1   1    3.36    0.26
  15   1  -1    3.25    0.40
 -15   1   1    2.91    0.31
 -15   1   1    2.64    0.35
 -15   1   1    3.63    0.35
  15   1  -1    3.74    0.45
  15   1  -1    3.53    0.27
  15   1  -1    2.56    0.33
 -13  -1   1    7.28    0.43
 -13  -1   1    6.73    0.41
 -13  -1   1    7.22    0.45
  13  -1  -1    7.88    0.41
  13  -1  -1    7.58    0.43
 -13  -1   1    6.80    0.36
  13  -1  -1    7.00    0.41
  13  -1  -1    6.83    0.46
 -13   1   1    7.89    0.39
  13   1  -1    6.78    0.46
  13   1  -1    6.97    0.41
  13   1  -1    7.30    0.37
 -13   1   1    7.45    0.46
  13   1  -1    7.03    0.42
 -13   1   1    7.65    0.38
 -13   1   1    7.35    0.43
  11  -1  -1   33.44    1.49
 -11  -1   1   33.37    1.48
  11  -1  -1   34.46    1.51
 -11  -1   1   35.46    1.50
  11  -1  -1   32.29    1.50
  11  -1  -1   32.74    1.52
 -11  -1   1   34.46    1.52
 -11  -1   1   33.15    1.52
  11   1  -1   33.37    1.52
  11   1  -1   34.58    1.51
  11   1  -1   33.62    1.48
 -11   1   1   33.13    1.52
  11   1  -1   33.94    1.50
 -11   1   1   34.17    1.49
 -11   1   1   34.11    1.52
 -11   1   1   33.36    1.49
   9  -1  -1   47.96    2.11
  -9  -1   1   44.92    2.10
  -9  -1   1   47.24    2.08
   9  -1  -1   47.15    2.08
   9  -1  -1   47.64    2.09
  -9  -1   1   47.59    2.11
  -9  -1   1   48.54    2.09
  -9   1   1   48.65    2.10
  -9   1   1   50.25    2.09
   9   1  -1   47.25    2.10
   9   1  -1   48.41    2.11
  -9   1   1   47.92    2.11
   9   1  -1   46.71    2.09
   9   1  -1   46.42    2.08
  -9   1   1   47.54    2.09
  -7  -1   1    3.26    0.18
  -7  -1   1    2.68    0.17
   7  -1  -1    3.52    0.20
   7  -1  -1    3.55    0.19
  -7  -1   1    2.78    0.19
   7  -1  -1    3.43    0.17
   7  -1  -1    3.69    0.17
   7   1  -1    3.05    0.18
  -7   1   1    3.31    0.20
  -7   1   1    3.49    0.19
  -7   1   1    3.37    0.17
  -7   1   1    3.09    0.17
   7   1  -1    2.61    0.19
   7   1  -1    3.18    0.16
   5  -1  -1   14.51    0.64
  -5  -1   1   14.71    0.65
  -5  -1   1   14.45    0.65
  -5  -1   1   14.61    0.64
   5  -1  -1   14.82    0.64
   5  -1  -1   14.38    0.65
   5  -1  -1   14.44    0.66
   5   1  -1   14.84    0.64
   5   1  -1   13.88    0.65
  -5   1   1   15.18    0.64
  -5   1   1   14.74    0.65
   5   1  -1   14.45    0.65
   5   1  -1   14.38    0.65
  -5   1   1   14.36    0.65
  -5   1   1   14.45    0.66
   3  -1  -1  319.19   13.36
  -3  -1   1  295.74   13.36
   3   1  -1  289.65   13.36
  -3   1   1  313.68   13.36
   3   1  -1  321.43   13.36
   1  -1  -1  179.79    7.80
   1  -1  -1  203.79    7.80
  -1   1   1  203.90    7.80
   1   1  -1  166.36    7.79
   1   1  -1  171.24    7.80
   1   1  -1  153.77    7.79
   1  -1   1  495.21   20.57
  -1  -1  -1  432.82   20.57
   1  -1   1  547.10   20.57
   1  -1   1  510.15   20.57
   1   1   1  427.76   20.57
   1   1   1  513.58   20.57
  -1   1  -1  403.59   20.57
   1   1   1  466.74   20.57
   3  -1   1   16.63    0.72
   3  -1   1   15.76    0.71
  -3  -1  -1   16.46    0.72
  -3  -1  -1   15.26    0.72
  -3  -1  -1   15.84    0.71
  -3  -1  -1   16.04    0.71
   3  -1   1   16.22    0.72
   3  -1   1   16.14    0.71
  -3   1  -1   16.00    0.71
   3   1   1   16.07    0.72
   3   1   1   16.13    0.72
   3   1   1   16.33    0.71
  -3   1  -1   15.97    0.71
  -3   1  -1   17.29    0.72
  -3   1  -1   15.61    0.72
   5  -1   1    2.15    0.11
  -5  -1  -1    1.96    0.12
   5  -1   1    1.67    0.13
  -5  -1  -1    1.86    0.14
   5  -1   1    1.93    0.14
  -5  -1  -1    1.91    0.13
  -5  -1  -1    1.89    0.11
   5   1   1    2.08    0.13
   5   1   1    1.61    0.14
  -5   1  -1    1.65    0.14
   5   1   1    2.28    0.12
   5   1   1    1.87    0.11
  -5   1  -1    1.80    0.11
  -5   1  -1    1.49    0.12
  -5   1  -1    1.89    0.11
  -7  -1  -1   19.11    0.94
  -7  -1  -1   21.48    0.95
   7  -1   1   20.81    0.95
   7  -1   1   21.70    0.94
   7  -1   1   21.40    0.96
   7  -1   1   19.98    0.94
  -7  -1  -1   20.84    0.93
  -7   1  -1   21.78    0.96
   7   1   1   20.64    0.95
   7   1   1   22.00    0.96
  -7   1  -1   21.70    0.94
   7   1   1   20.26    0.93
  -7   1  -1   20.90    0.93
   7   1   1   21.25    0.94
  -7   1  -1   21.54    0.94
  -9  -1  -1    0.89    0.13
   9  -1   1    0.93    0.12
  -9  -1  -1    0.77    0.12
   9  -1   1    0.91    0.14
  -9  -1  -1    1.00    0.15
   9  -1   1    1.15    0.17
  -9  -1  -1    1.19    0.11
   9  -1   1    1.01    0.14
  -9   1  -1    1.37    0.15
   9   1   1    0.73    0.11
  -9   1  -1    0.96    0.16
   9   1   1    1.29    0.17
   9   1   1    1.01    0.16
  -9   1  -1    0.85    0.12
   9   1   1    0.92    0.13
  -9   1  -1    1.03    0.13
 -11  -1  -1    6.39    0.38
 -11  -1  -1    6.52    0.41
  11  -1   1    6.73    0.36
 -11  -1  -1    6.79    0.37
  11  -1   1    6.67    0.38
  11  -1   1    6.80    0.36
 -11  -1  -1    6.64    0.37
  11  -1   1    5.59    0.41
  11   1   1    6.31    0.42
 -11   1  -1    6.54    0.37
  11   1   1    6.54    0.35
  11   1   1    5.93    0.38
 -11   1  -1    6.93    0.34
 -11   1  -1    6.67    0.41
  11   1   1    6.15    0.37
 -11   1  -1    6.79    0.36
  13  -1   1    5.34    0.35
  13  -1   1    5.17    0.56
 -13  -1  -1    5.86    0.38
 -13  -1  -1    5.44    0.36
  13  -1   1    5.22    0.37
 -13  -1  -1    4.81    0.41
  13  -1   1    4.93    0.38
 -13  -1  -1    4.78    0.30
 -13   1  -1    4.91    0.42
  13   1   1    5.51    0.38
  13   1   1    5.61    0.54
 -13   1  -1    5.45    0.37
 -13   1  -1    5.37    0.37
  13   1   1    5.36    0.44
 -13   1  -1    5.28    0.31
  15  -1   1    0.93    0.26
  15  -1   1    1.46    0.47
 -15  -1  -1    0.80    0.17
 -15  -1  -1    1.22    0.28
 -15  -1  -1    1.48    0.34
 -15  -1  -1    1.59    0.30
  15  -1   1    0.95    0.38
  15  -1   1    1.07    0.28
  15   1   1    1.02    0.28
 -15   1  -1    1.25    0.27
  15   1   1    1.00    0.41
 -15   1  -1    0.98    0.34
 -15   1  -1    1.05    0.26
 -15   1  -1    0.94    0.18
  17  -1   1    3.70    0.62
 -17  -1  -1    4.38    0.35
  17  -1   1    4.80    0.54
 -17  -1  -1    4.80    0.68
 -17  -1  -1    4.99    0.53
 -17  -1  -1    3.51    0.46
  17  -1   1    4.78    0.55
 -17   1  -1    5.33    0.55
  17   1   1    4.30    0.52
  17   1   1    4.61    0.67
 -17   1  -1    4.92    0.64
 -17   1  -1    4.21    0.37
 -17   1  -1    4.08    0.52
 -18  -2   1    0.02    0.45
 -18  -2   1    0.04    0.39
 -18  -2   1    0.83    0.36
  18  -2  -1   -0.44    0.55
  18  -2  -1    0.05    0.31
  18  -2  -1   -0.02    0.35
 -18   2   1    0.53    0.46
 -18   2   1    0.41    0.25
 -18   2   1    0.26    0.32
 -18   2   1    0.02    0.35
  18   2  -1    0.30    0.55
  18   2  -1    0.17    0.33
  16  -2  -1    0.45    0.23
  16  -2  -1    1.09    0.38
 -16  -2   1    0.57    0.14
  16  -2  -1    0.76    0.25
 -16  -2   1    0.73    0.27
 -16  -2   1    0.66    0.32
 -16  -2   1    0.44    0.29
 -16   2   1    0.09    0.27
 -16   2   1    0.40    0.18
 -16   2   1    0.76    0.22
 -16   2   1    0.89    0.35
  16   2  -1    0.50    0.26
  16   2  -1    0.56    0.38
  14  -2  -1   21.27    0.98
  14  -2  -1   21.28    0.97
 -14  -2   1   21.81    1.01
 -14  -2   1   21.17    0.94
 -14  -2   1   20.54    1.03
 -14  -2   1   18.70    0.99
 -14   2   1   22.32    0.97
  14   2  -1   21.21    1.00
 -14   2   1   21.61    1.03
  14   2  -1   18.36    0.99
  14   2  -1   22.60    1.04
 -14   2   1   21.77    0.97
 -14   2   1   21.52    1.01
 -12  -2   1   64.50    2.73
  12  -2  -1   62.35    2.78
 -12  -2   1   63.42    2.76
 -12  -2   1   63.54    2.78
  12  -2  -1   60.63    2.75
  12  -2  -1   65.83    2.76
 -12  -2   1   62.33    2.77
 -12   2   1   60.86    2.78
  12   2  -1   59.60    2.73
  12   2  -1   62.70    2.78
  12   2  -1   62.68    2.76
 -12   2   1   62.28    2.75
 -12   2   1   61.64    2.77
  12   2  -1   63.57    2.76
 -12   2   1   62.45    2.74
 -10  -2   1  101.81    4.54
 -10  -2   1  106.53    4.54
  10  -2  -1  105.95    4.54
  10  -2  -1  104.23    4.53
 -10  -2   1  101.69    4.52
  10  -2  -1  102.42    4.53
 -10  -2   1  102.10    4.55
  10  -2  -1  105.01    4.55
  10   2  -1  102.28    4.54
  10   2  -1  101.80    4.55
  10   2  -1  103.82    4.52
 -10   2   1  104.20    4.55
 -10   2   1  103.35    4.53
 -10   2   1  106.43    4.52
 -10   2   1  104.67    4.55
  10   2  -1  106.55    4.54
   8  -2  -1   25.06    1.16
  -8  -2   1   27.59    1.17
   8  -2  -1   25.90    1.18
  -8  -2   1   26.15    1.18
  -8  -2   1   26.53    1.18
   8  -2  -1   25.87    1.17
   8  -2  -1   26.32    1.16
  -8  -2   1   26.78    1.15
  -8   2   1   25.17    1.16
   8   2  -1   26.51    1.15
  -8   2   1   26.57    1.16
   8   2  -1   27.25    1.17
  -8   2   1   26.43    1.18
   8   2  -1   26.45    1.18
   8   2  -1   26.16    1.17
  -6  -2   1    2.59    0.16
   6  -2  -1    2.69    0.15
   6  -2  -1    3.00    0.15
  -6  -2   1    2.89    0.13
  -6  -2   1    2.83    0.16
   6  -2  -1    2.83    0.16
   6  -2  -1    2.92    0.18
   6   2  -1    3.13    0.16
  -6   2   1    2.36    0.15
   6   2  -1    3.10    0.16
  -6   2   1    2.61    0.14
   6   2  -1    2.88    0.17
  -6   2   1    2.45    0.17
   6   2  -1    2.62    0.13
  -6   2   1    3.26    0.17
  -4   2   1 1000.00   42.22
  -4   2   1  999.04   42.21
  -4   2   1  923.40   42.22
   2  -2  -1  460.61   23.53
   2  -2  -1  547.02   23.54
   2  -2  -1  510.37   23.53
   2   2  -1  554.89   23.53
   2   2  -1  589.61   23.54
   2   2  -1  595.75   23.53
   0  -2  -1  151.43    6.78
   0  -2   1  166.56    6.77
   0  -2  -1  155.61    6.78
   0  -2  -1  153.56    6.77
   0  -2  -1  136.32    6.77
   0   2   1  166.66    6.77
   0   2   1  161.55    6.77
   0   2   1  157.99    6.78
   0   2  -1  157.12    6.77
   0   2   1  154.85    6.77
   2  -2   1  659.57   27.35
   2  -2   1  614.35   27.35
  -2  -2  -1  647.51   27.35
   2  -2   1  579.18   27.35
  -2  -2  -1  619.70   27.35
   2   2   1  570.60   27.35
  -2   2  -1  580.78   27.35
   2   2   1  688.60   27.35
   2   2   1  718.76   27.35
   4  -2   1   34.95    1.49
  -4  -2  -1   35.90    1.50
  -4  -2  -1   32.83    1.49
  -4  -2  -1   35.70    1.50
   4  -2   1   32.29    1.50
   4  -2   1   34.34    1.50
  -4  -2  -1   34.60    1.49
   4  -2   1   34.28    1.49
  -4   2  -1   33.97    1.49
  -4   2  -1   32.58    1.50
   4   2   1   33.97    1.50
   4   2   1   34.11    1.49
  -4   2  -1   33.29    1.50
   4   2   1   33.26    1.50
  -4   2  -1   34.57    1.49
  -6  -2  -1   74.67    3.40
   6  -2   1   78.95    3.38
  -6  -2  -1   74.93    3.39
  -6  -2  -1   77.01    3.38
   6  -2   1   79.74    3.39
  -6  -2  -1   75.95    3.39
   6  -2   1   74.26    3.38
   6  -2   1   76.74    3.40
  -6   2  -1   79.54    3.40
  -6   2  -1   79.46    3.39
   6   2   1   77.23    3.39
  -6   2  -1   79.07    3.39
   6   2   1   78.47    3.39
   6   2   1   79.14    3.40
  -6   2  -1   79.40    3.39
   8  -2   1    0.30    0.09
  -8  -2  -1    0.15    0.10
  -8  -2  -1    0.20    0.09
   8  -2   1    0.16    0.09
   8  -2   1    0.26    0.10
   8  -2   1    0.07    0.13
  -8  -2  -1    0.22    0.12
  -8  -2  -1    0.27    0.06
   8   2   1    0.25    0.11
  -8   2  -1    0.22    0.09
   8   2   1    0.18    0.12
  -8   2  -1    0.04    0.09
  -8   2  -1    0.29    0.08
   8   2   1    0.47    0.10
  -8   2  -1    0.06    0.12
 -10  -2  -1   29.06    1.27
 -10  -2  -1   29.95    1.29
 -10  -2  -1   27.65    1.25
  10  -2   1   28.74    1.28
  10  -2   1   28.25    1.29
  10  -2   1   27.48    1.28
  10  -2   1   28.99    1.26
 -10  -2  -1   27.40    1.27
  10   2   1   27.75    1.29
 -10   2  -1   28.44    1.29
  10   2   1   27.70    1.28
  10   2   1   29.04    1.27
 -10   2  -1   26.88    1.26
 -10   2  -1   28.11    1.27
 -10   2  -1   27.79    1.27
  12  -2   1    6.59    0.38
  12  -2   1    6.54    0.40
  12  -2   1    6.12    0.46
  12  -2   1    6.07    0.38
 -12  -2  -1    6.49    0.40
 -12  -2  -1    6.61    0.43
 -12  -2  -1    6.90    0.39
 -12  -2  -1    6.73    0.39
 -12   2  -1    6.59    0.44
  12   2   1    6.34    0.41
  12   2   1    6.32    0.40
 -12   2  -1    6.87    0.38
  12   2   1    5.89    0.44
 -12   2  -1    6.37    0.35
 -12   2  -1    6.61    0.39
 -14  -2  -1    5.68    0.54
  14  -2   1    3.82    0.38
 -14  -2  -1    4.13    0.27
 -14  -2  -1    4.32    0.41
 -14  -2  -1    4.79    0.45
  14  -2   1    4.89    0.49
  14  -2   1    4.08    0.38
  14  -2   1    4.15    0.39
 -14   2  -1    4.03    0.36
 -14   2  -1    4.33    0.30
 -14   2  -1    4.25    0.46
  14   2   1    3.74    0.39
 -14   2  -1    4.50    0.37
  14   2   1    4.80    0.42
  14   2   1    4.36    0.49
 -16  -2  -1    3.87    0.48
  16  -2   1    3.03    0.52
 -16  -2  -1    3.25    0.37
  16  -2   1    2.84    0.36
 -16  -2  -1    2.74    0.39
 -16  -2  -1    2.82    0.27
  16  -2   1    3.15    0.38
  16   2   1    4.12    0.54
 -16   2  -1    2.84    0.34
 -16   2  -1    3.28    0.46
 -16   2  -1    2.65    0.31
  16   2   1    3.47    0.46
 -16   2  -1    2.76    0.36
  17  -3  -1    1.99    0.30
 -17  -3   1    1.20    0.36
 -17  -3   1    2.05    0.21
 -17  -3   1    1.40    0.34
 -17  -3   1    2.48    0.47
  17  -3  -1    1.23    0.33
  17  -3  -1    2.55    0.54
  17   3  -1    2.48    0.53
 -17   3   1    1.86    0.43
  17   3  -1    1.58    0.32
 -17   3   1    1.72    0.27
 -17   3   1    1.57    0.35
 -17   3   1    2.15    0.27
 -15  -3   1    2.81    0.35
 -15  -3   1    2.73    0.35
  15  -3  -1    2.25    0.27
  15  -3  -1    2.63    0.39
  15  -3  -1    2.43    0.30
 -15  -3   1    2.57    0.19
  15  -3  -1    2.90    0.32
 -15  -3   1    2.68    0.31
 -15   3   1    2.61    0.34
 -15   3   1    2.66    0.34
  15   3  -1    2.85    0.34
 -15   3   1    2.77    0.27
  15   3  -1    2.32    0.37
 -15   3   1    2.74    0.27
 -13  -3   1    9.99    0.56
  13  -3  -1    9.15    0.51
  13  -3  -1   10.52    0.53
 -13  -3   1   10.99    0.55
  13  -3  -1    9.75    0.59
 -13  -3   1   10.43    0.46
 -13  -3   1   10.13    0.54
  13  -3  -1    9.90    0.52
  13   3  -1    9.86    0.57
 -13   3   1   10.45    0.50
 -13   3   1   10.37    0.51
  13   3  -1   11.01    0.54
  13   3  -1    9.06    0.55
 -13   3   1    9.11    0.57
 -13   3   1   10.62    0.54
  11  -3  -1    1.60    0.16
 -11  -3   1    0.95    0.16
  11  -3  -1    1.42    0.19
  11  -3  -1    2.00    0.23
 -11  -3   1    1.85    0.20
 -11  -3   1    1.46    0.17
 -11  -3   1    1.56    0.10
  11  -3  -1    1.39    0.17
 -11   3   1    1.52    0.16
 -11   3   1    1.21    0.14
 -11   3   1    1.62    0.18
  11   3  -1    1.48    0.17
 -11   3   1    1.55    0.20
  11   3  -1    1.12    0.19
  11   3  -1    1.45    0.19
   9  -3  -1    3.02    0.17
   9  -3  -1    2.90    0.23
  -9  -3   1    2.69    0.20
  -9  -3   1    2.38    0.13
  -9  -3   1    2.58    0.19
  -9  -3   1    2.31    0.19
   9  -3  -1    3.06    0.20
   9  -3  -1    2.90    0.18
   9   3  -1    2.55    0.19
  -9   3   1    2.83    0.21
   9   3  -1    2.03    0.19
  -9   3   1    2.86    0.20
  -9   3   1    2.64    0.15
   9   3  -1    2.57    0.21
   7  -3  -1  109.72    4.83
   7  -3  -1  114.15    4.85
  -7  -3   1  107.87    4.82
  -7  -3   1  107.22    4.84
  -7  -3   1  108.58    4.84
   7  -3  -1  112.84    4.84
   7  -3  -1  109.73    4.83
  -7   3   1  111.62    4.83
   7   3  -1  111.32    4.84
  -7   3   1  112.99    4.85
  -7   3   1  110.08    4.84
   7   3  -1  116.47    4.84
  -7   3   1  108.67    4.84
   7   3  -1  114.27    4.84
  -5  -3   1   12.72    0.54
   5  -3  -1   11.34    0.53
   5  -3  -1   11.59    0.54
  -5  -3   1   12.42    0.53
   5  -3  -1   11.61    0.53
   5   3  -1   12.18    0.53
  -5   3   1   11.73    0.54
   5   3  -1   11.99    0.54
  -5   3   1   10.77    0.52
   5   3  -1   11.91    0.54
  -5   3   1   11.86    0.53
  -5   3   1   11.34    0.54
   3  -3  -1    2.51    0.12
  -3  -3   1    2.27    0.13
  -3  -3   1    2.47    0.11
  -3  -3   1    2.14    0.12
   3  -3  -1    2.13    0.13
  -3   3   1    2.18    0.12
   3   3  -1    2.73    0.13
  -3   3   1    2.22    0.11
  -3   3   1    2.27    0.13
   3   3  -1    2.42    0.11
   3   3  -1    2.09    0.12
   3   3  -1    2.38    0.12
   1  -3  -1  364.96   16.43
   1  -3  -1  405.38   16.42
  -1  -3   1  341.19   16.43
   1  -3  -1  424.15   16.43
  -1  -3   1  413.46   16.43
   1   3  -1  350.37   16.42
   1   3  -1  400.25   16.43
  -1   3   1  377.90   16.43
   1   3  -1  358.60   16.43
  -1   3   1  352.59   16.42
   1  -3   1    4.64    0.23
  -1  -3  -1    4.98    0.24
  -1  -3  -1    4.96    0.24
   1  -3   1    5.42    0.24
  -1  -3  -1    5.51    0.24
   1  -3   1    5.44    0.25
  -1  -3  -1    5.32    0.24
   1  -3   1    5.08    0.24
  -1   3  -1    5.38    0.24
   1   3   1    4.87    0.24
   1   3   1    5.06    0.24
  -1   3  -1    5.09    0.24
   1   3   1    5.19    0.24
   1   3   1    5.12    0.24
   3  -3   1  754.94   35.63
   3  -3   1  748.82   35.62
   3  -3   1  813.68   35.63
  -3  -3  -1  735.64   35.62
  -3  -3  -1  779.76   35.63
   3   3   1  920.41   35.64
   3   3   1  938.57   35.63
  -3   3  -1  884.92   35.63
  -5  -3  -1   20.91    0.92
  -5  -3  -1   22.70    0.93
   5  -3   1   20.25    0.94
  -5  -3  -1   20.71    0.91
   5  -3   1   19.98    0.93
  -5  -3  -1   19.86    0.93
   5  -3   1   20.78    0.92
   5  -3   1   20.53    0.92
  -5  -3  -1   21.71    0.92
   5   3   1   21.88    0.93
  -5   3  -1   20.05    0.92
   5   3   1   20.44    0.93
  -5   3  -1   20.23    0.92
  -5   3  -1   20.81    0.94
  -5   3  -1   19.96    0.93
   5   3   1   21.23    0.92
  -7  -3  -1   17.73    0.77
  -7  -3  -1   17.20    0.78
  -7  -3  -1   16.46    0.75
   7  -3   1   16.31    0.77
  -7  -3  -1   17.36    0.79
   7  -3   1   17.03    0.79
   7  -3   1   17.65    0.76
   7  -3   1   16.92    0.78
   7   3   1   15.62    0.79
   7   3   1   17.20    0.77
  -7   3  -1   17.29    0.77
  -7   3  -1   17.22    0.77
  -7   3  -1   16.87    0.79
  -7   3  -1   16.68    0.77
   7   3   1   17.77    0.79
   9  -3   1    6.16    0.36
   9  -3   1    6.39    0.37
  -9  -3  -1    6.61    0.38
   9  -3   1    6.69    0.40
   9  -3   1    6.68    0.37
  -9  -3  -1    7.04    0.37
  -9  -3  -1    6.77    0.36
  -9  -3  -1    7.19    0.33
  -9   3  -1    6.97    0.36
   9   3   1    6.34    0.37
  -9   3  -1    6.89    0.36
   9   3   1    7.26    0.39
  -9   3  -1    7.35    0.35
   9   3   1    7.61    0.37
  -9   3  -1    7.49    0.40
  11  -3   1    2.81    0.26
  11  -3   1    2.63    0.23
 -11  -3  -1    2.71    0.30
 -11  -3  -1    2.45    0.22
  11  -3   1    2.36    0.30
  11  -3   1    3.01    0.25
 -11  -3  -1    3.08    0.18
 -11  -3  -1    2.50    0.27
  11   3   1    2.51    0.26
 -11   3  -1    2.48    0.20
 -11   3  -1    2.33    0.28
 -11   3  -1    2.64    0.24
  11   3   1    2.98    0.31
 -11   3  -1    2.67    0.24
  11   3   1    3.17    0.27
 -13  -3  -1    0.39    0.25
  13  -3   1    0.84    0.30
 -13  -3  -1    0.94    0.25
  13  -3   1    0.51    0.20
 -13  -3  -1    0.86    0.20
 -13  -3  -1    0.81    0.14
  13  -3   1    1.14    0.22
  13  -3   1    0.95    0.22
  13   3   1    0.88    0.23
 -13   3  -1    0.74    0.21
 -13   3  -1    0.70    0.19
 -13   3  -1    0.68    0.26
 -13   3  -1    0.57    0.16
  13   3   1    0.52    0.24
  13   3   1    1.02    0.31
  15  -3   1    1.45    0.42
 -15  -3  -1    1.39    0.17
 -15  -3  -1    0.80    0.31
 -15  -3  -1    1.10    0.27
  15  -3   1    2.09    0.29
  15  -3   1    1.20    0.31
 -15  -3  -1    1.41    0.36
  15  -3   1    1.58    0.30
 -15   3  -1    1.61    0.27
  15   3   1    2.48    0.44
 -15   3  -1    1.09    0.35
 -15   3  -1    1.42    0.23
  15   3   1    0.87    0.28
  17  -3   1    0.65    0.60
  17  -3   1    0.56    0.41
 -17  -3  -1    0.50    0.34
 -17  -3  -1    0.57    0.76
  17  -3   1    0.70    0.36
 -17  -3  -1    0.75    0.20
 -17   3  -1    0.29    0.35
 -17   3  -1    1.55    0.52
  17   3   1    0.91    0.61
 -17   3  -1    0.60    0.26
  17   3   1    0.85    0.38
 -17   3  -1    1.27    0.37
 -16  -4   1    6.21    0.80
  16  -4  -1    6.79    0.47
 -16  -4   1    7.42    0.53
 -16  -4   1    7.60    0.35
  16  -4  -1    6.53    0.76
  16  -4  -1    7.12    0.52
 -16  -4   1    7.58    0.57
 -16  -4   1    7.22    0.35
  16   4  -1    7.38    0.53
  16   4  -1    7.21    0.66
 -16   4   1    7.55    0.44
 -16   4   1    6.84    0.52
 -16   4   1    8.03    0.46
 -16   4   1    7.73    0.61
 -14  -4   1    2.03    0.30
  14  -4  -1    1.87    0.27
  14  -4  -1    2.06    0.34
 -14  -4   1    2.93    0.34
  14  -4  -1    2.61    0.26
 -14  -4   1    1.87    0.14
 -14  -4   1    2.38    0.28
  14  -4  -1    2.01    0.25
 -14  -4   1    2.10    0.15
  14   4  -1    2.49    0.34
  14   4  -1    2.03    0.26
 -14   4   1    2.09    0.24
 -14   4   1    2.20    0.22
 -14   4   1    2.14    0.32
 -14   4   1    2.04    0.26
  14   4  -1    2.01    0.29
  12  -4  -1    1.96    0.21
 -12  -4   1    2.05    0.24
  12  -4  -1    1.32    0.25
  12  -4  -1    1.85    0.21
 -12  -4   1    1.93    0.22
 -12  -4   1    1.92    0.21
 -12  -4   1    1.52    0.11
  12  -4  -1    1.90    0.19
 -12  -4   1    1.32    0.10
 -12   4   1    1.65    0.16
 -12   4   1    1.51    0.19
 -12   4   1    1.59    0.20
  12   4  -1    1.90    0.24
  12   4  -1    1.40    0.19
  12   4  -1    1.63    0.21
 -12   4   1    1.81    0.24
 -10  -4   1    0.15    0.06
 -10  -4   1    0.11    0.14
  10  -4  -1   -0.12    0.11
  10  -4  -1   -0.10    0.12
 -10  -4   1    0.10    0.04
 -10  -4   1    0.01    0.12
  10  -4  -1    0.08    0.09
 -10  -4   1   -0.09    0.11
  10  -4  -1   -0.11    0.16
 -10   4   1    0.13    0.10
  10   4  -1    0.02    0.12
 -10   4   1    0.27    0.13
 -10   4   1    0.01    0.07
 -10   4   1    0.12    0.14
  10   4  -1   -0.12    0.11
  10   4  -1    0.14    0.14
   8  -4  -1   50.50    2.20
   8  -4  -1   51.89    2.23
  -8  -4   1   49.32    2.22
  -8  -4   1   53.17    2.22
  -8  -4   1   49.03    2.21
   8  -4  -1   50.99    2.21
   8  -4  -1   49.50    2.21
  -8   4   1   46.57    2.22
  -8   4   1   48.99    2.22
  -8   4   1   49.41    2.19
   8   4  -1   52.17    2.22
   8   4  -1   51.92    2.22
  -6  -4   1   28.19    1.32
  -6  -4   1   28.21    1.32
   6  -4  -1   31.02    1.32
   6  -4  -1   30.82    1.33
  -6  -4   1   28.65    1.31
   6  -4  -1   30.31    1.31
   6   4  -1   29.71    1.31
  -6   4   1   30.23    1.30
   6   4  -1   28.75    1.32
  -6   4   1   30.02    1.31
  -6   4   1   31.03    1.32
  -6   4   1   29.88    1.33
   4  -4  -1  582.02   23.39
   4  -4  -1  545.97   23.39
  -4  -4   1  470.54   23.38
  -4   4   1  623.07   23.40
  -4   4   1  475.94   23.38
  -2  -4   1    8.49    0.37
   2  -4  -1    7.94    0.37
  -2  -4   1    8.23    0.38
  -2  -4   1    8.53    0.37
   2  -4  -1    7.74    0.38
   2  -4  -1    8.50    0.38
   2  -4  -1    7.92    0.38
  -2  -4   1    8.41    0.38
   2  -4  -1    8.28    0.37
   2   4  -1    7.72    0.38
  -2   4   1    8.30    0.38
  -2   4   1    7.72    0.37
   2   4  -1    7.96    0.37
  -2   4   1    8.04    0.38
   2   4  -1    8.58    0.37
   2   4  -1    7.98    0.38
   2   4  -1    7.90    0.38
   0  -4   1   62.87    2.77
   0  -4  -1   63.77    2.78
   0  -4  -1   63.75    2.78
   0  -4  -1   65.75    2.78
   0  -4  -1   64.94    2.78
   0  -4   1   62.63    2.78
   0  -4  -1   65.40    2.78
   0  -4   1   62.26    2.78
   0  -4   1   61.15    2.78
   0   4   1   65.28    2.78
   0   4   1   63.80    2.78
   0   4   1   66.76    2.78
   0   4  -1   61.40    2.78
   0   4  -1   63.46    2.77
   0   4   1   64.76    2.78
   0   4  -1   63.79    2.78
   0   4   1   62.48    2.78
   0   4  -1   63.44    2.78
   2  -4   1    9.59    0.41
   2  -4   1    8.90    0.40
  -2  -4  -1    9.23    0.41
  -2  -4  -1    9.73    0.42
  -2  -4  -1    8.96    0.41
  -2  -4  -1    8.73    0.42
   2  -4   1    8.60    0.42
   2  -4   1    8.66    0.42
   2   4   1    9.03    0.42
   2   4   1    8.90    0.41
   2   4   1    9.20    0.41
  -2   4  -1    9.10    0.42
  -2   4  -1    8.85    0.41
   2   4   1    9.39    0.42
  -4  -4  -1  199.99    9.07
   4   4   1  200.93    9.07
  -4   4  -1  231.95    9.06
  -4   4  -1  202.34    9.07
  -6  -4  -1    0.47    0.10
  -6  -4  -1    0.28    0.09
  -6  -4  -1    0.28    0.05
   6  -4   1    0.40    0.09
   6  -4   1    0.34    0.06
  -6  -4  -1    0.29    0.06
   6  -4   1    0.41    0.12
  -6  -4  -1    0.29    0.07
   6  -4   1    0.35    0.09
   6   4   1    0.39    0.11
  -6   4  -1    0.48    0.09
  -6   4  -1    0.24    0.08
  -6   4  -1    0.30    0.07
   6   4   1    0.55    0.09
  -6   4  -1    0.38    0.10
  -8  -4  -1    0.18    0.07
  -8  -4  -1    0.25    0.12
   8  -4   1    0.18    0.09
   8  -4   1    0.05    0.15
   8  -4   1    0.14    0.17
  -8  -4  -1    0.10    0.06
  -8  -4  -1    0.08    0.12
  -8  -4  -1   -0.05    0.09
   8  -4   1    0.10    0.11
   8   4   1   -0.04    0.13
  -8   4  -1    0.04    0.13
  -8   4  -1   -0.03    0.10
   8   4   1    0.21    0.10
  -8   4  -1    0.12    0.09
   8   4   1    0.23    0.11
  -8   4  -1    0.00    0.09
  10  -4   1   18.96    0.90
 -10  -4  -1   18.90    0.89
  10  -4   1   19.28    0.87
 -10  -4  -1   18.23    0.86
 -10  -4  -1   18.42    0.83
 -10  -4  -1   19.48    0.88
 -10  -4  -1   18.71    0.84
  10  -4   1   18.61    0.85
 -10   4  -1   17.81    0.89
 -10   4  -1   18.90    0.86
 -10   4  -1   17.48    0.86
 -10   4  -1   18.54    0.86
  10   4   1   18.94    0.90
  10   4   1   19.55    0.88
  10   4   1   18.59    0.87
 -12  -4  -1   25.31    1.16
 -12  -4  -1   23.78    1.16
  12  -4   1   24.34    1.18
 -12  -4  -1   25.20    1.14
  12  -4   1   25.89    1.13
  12  -4   1   23.96    1.14
 -12  -4  -1   24.28    1.10
 -12  -4  -1   24.61    1.11
  12  -4   1   25.03    1.14
  12   4   1   24.53    1.15
 -12   4  -1   24.02    1.13
  12   4   1   24.70    1.16
 -12   4  -1   24.17    1.14
  12   4   1   24.24    1.18
 -12   4  -1   25.59    1.13
 -12   4  -1   25.42    1.18
 -14  -4  -1    0.95    0.47
 -14  -4  -1    1.40    0.17
 -14  -4  -1    1.61    0.32
  14  -4   1    1.35    0.26
  14  -4   1    1.34    0.37
 -14  -4  -1    1.13    0.18
  14  -4   1    1.38    0.29
 -14  -4  -1    0.94    0.23
  14   4   1    1.19    0.26
 -14   4  -1    1.19    0.20
 -14   4  -1    1.54    0.26
 -14   4  -1    1.62    0.34
  14   4   1    1.36    0.37
 -14   4  -1    1.60    0.24
  16  -4   1   -0.24    0.35
 -16  -4  -1    0.16    0.43
  16  -4   1    0.06    0.31
 -16  -4  -1    0.27    0.29
 -16  -4  -1    0.09    0.22
  16  -4   1   -0.15    0.50
 -16   4  -1   -0.07    0.30
 -16   4  -1    0.17    0.28
  16   4   1    0.01    0.33
 -16   4  -1   -0.08    0.22
 -16   4  -1    0.35    0.39
  16   4   1    0.17    0.50
 -17  -5   1    0.11    0.41
  17  -5  -1   -0.12    0.37
 -17  -5   1    0.11    0.31
  17  -5  -1    0.37    0.51
  17   5  -1    0.56    0.52
 -17   5   1   -0.04    0.41
 -17   5   1    0.10    0.22
 -17   5   1    0.21    0.27
 -17   5   1    0.00    0.34
  17   5  -1    0.14    0.34
  15  -5  -1    0.42    0.29
  15  -5  -1    0.55    0.27
 -15  -5   1    0.70    0.25
  15  -5  -1    0.45    0.19
  15  -5  -1    0.52    0.37
 -15  -5   1    0.28    0.30
 -15   5   1    0.87    0.17
 -15   5   1    0.31    0.32
 -15   5   1    0.66    0.25
  15   5  -1    1.07    0.35
 -15   5   1    0.23    0.20
  15   5  -1    0.46    0.24
 -13  -5   1    0.51    0.22
  13  -5  -1    0.34    0.26
  13  -5  -1    0.31    0.14
 -13  -5   1    0.49    0.19
  13  -5  -1    0.40    0.20
  13  -5  -1    0.49    0.21
 -13  -5   1    0.44    0.22
  13   5  -1    0.64    0.27
 -13   5   1    0.40    0.12
  13   5  -1    0.28    0.22
 -13   5   1    0.30    0.24
  13   5  -1    0.36    0.19
 -13   5   1    0.50    0.20
 -13   5   1    0.28    0.16
 -11  -5   1    4.42    0.28
  11  -5  -1    4.36    0.34
 -11  -5   1    4.46    0.32
  11  -5  -1    4.30    0.29
  11  -5  -1    4.64    0.29
 -11  -5   1    4.02    0.32
 -11   5   1    5.05    0.30
 -11   5   1    4.13    0.27
  11   5  -1    3.49    0.29
  11   5  -1    4.72    0.30
  11   5  -1    3.92    0.32
 -11   5   1    3.99    0.33
 -11   5   1    3.94    0.23
   9  -5  -1    7.62    0.41
   9  -5  -1    6.64    0.39
  -9  -5   1    6.62    0.38
  -9  -5   1    6.98    0.37
   9  -5  -1    7.30    0.37
  -9   5   1    6.75    0.38
  -9   5   1    7.87    0.34
  -9   5   1    7.37    0.37
  -9   5   1    7.91    0.40
   9   5  -1    7.13    0.38
   9   5  -1    7.53    0.40
   9   5  -1    7.76    0.38
   7  -5  -1   92.73    4.05
  -7  -5   1   93.80    4.04
  -7  -5   1   89.24    4.04
   7  -5  -1   92.66    4.04
  -7  -5   1   91.70    4.04
   7  -5  -1   92.59    4.04
   7   5  -1   96.09    4.04
   7   5  -1   91.25    4.04
  -7   5   1   92.68    4.05
  -7   5   1   93.34    4.04
   7   5  -1   90.80    4.05
  -7   5   1   94.87    4.02
  -7   5   1   91.66    4.04
  -5  -5   1   62.10    2.66
  -5  -5   1   61.24    2.67
  -5  -5   1   59.33    2.67
   5  -5  -1   63.34    2.68
   5  -5  -1   61.21    2.66
   5  -5  -1   60.42    2.66
  -5  -5   1   58.51    2.64
  -5   5   1   62.50    2.65
   5   5  -1   59.38    2.67
  -5   5   1   60.13    2.67
  -5   5   1   59.94    2.66
  -5   5   1   61.61    2.65
   5   5  -1   62.07    2.66
   3  -5  -1  769.91   35.49
  -3  -5   1  775.62   35.49
   3  -5  -1  741.51   35.48
   3  -5  -1  852.65   35.49
   3  -5  -1  799.09   35.48
  -3  -5   1  870.83   35.49
   3   5  -1  874.57   35.49
   3   5  -1  863.15   35.48
  -3   5   1  820.91   35.49
   1  -5  -1   22.33    1.00
  -1  -5   1   22.59    1.01
  -1  -5   1   23.02    1.01
  -1  -5   1   22.16    1.00
   1  -5  -1   23.39    1.00
   1  -5  -1   23.53    1.00
  -1  -5   1   22.67    1.01
  -1  -5   1   23.17    0.99
   1  -5  -1   22.83    1.01
   1  -5  -1   22.99    1.01
   1   5  -1   21.06    1.01
  -1   5   1   22.17    1.01
  -1   5   1   23.68    1.01
  -1   5   1   23.09    1.00
  -1   5   1   23.03    1.00
  -1   5   1   23.45    1.00
   1   5  -1   22.65    1.01
   1   5  -1   21.78    1.01
   1   5  -1   21.34    1.00
   1   5  -1   23.10    0.99
  -1  -5  -1   56.76    2.44
   1  -5   1   55.84    2.44
  -1  -5  -1   56.81    2.43
   1  -5   1   53.77    2.44
  -1  -5  -1   55.88    2.43
   1  -5   1   52.47    2.44
  -1  -5  -1   57.43    2.44
  -1  -5  -1   55.95    2.44
   1  -5   1   56.76    2.42
   1   5   1   56.29    2.44
  -1   5  -1   54.35    2.44
  -1   5  -1   58.26    2.45
   1   5   1   55.97    2.44
  -1   5  -1   55.85    2.44
   1   5   1   56.12    2.44
  -1   5  -1   54.07    2.44
   1   5   1   54.71    2.44
   3  -5   1    1.97    0.10
   3  -5   1    1.81    0.14
  -3  -5  -1    1.92    0.14
  -3  -5  -1    1.61    0.13
  -3  -5  -1    2.11    0.11
  -3  -5  -1    1.58    0.11
   3  -5   1    2.03    0.12
  -3   5  -1    1.76    0.14
  -3   5  -1    2.22    0.12
   3   5   1    1.88    0.14
   3   5   1    2.21    0.12
   3   5   1    1.57    0.11
  -3   5  -1    1.80    0.14
   3   5   1    1.93    0.13
   5  -5   1    7.61    0.34
  -5  -5  -1    7.62    0.37
   5  -5   1    7.53    0.36
  -5  -5  -1    7.61    0.37
   5  -5   1    7.39    0.38
  -5  -5  -1    7.08    0.35
  -5  -5  -1    7.38    0.34
  -5   5  -1    7.25    0.35
  -5   5  -1    7.57    0.38
  -5   5  -1    7.76    0.37
   5   5   1    7.43    0.36
   5   5   1    6.97    0.38
  -5   5  -1    7.69    0.36
   5   5   1    7.65    0.38
   7  -5   1   40.30    1.72
  -7  -5  -1   38.95    1.70
  -7  -5  -1   37.95    1.72
   7  -5   1   40.20    1.69
  -7  -5  -1   38.07    1.69
  -7  -5  -1   37.30    1.69
  -7  -5  -1   39.68    1.71
   7  -5   1   37.33    1.72
   7  -5   1   38.84    1.71
   7   5   1   40.31    1.71
  -7   5  -1   39.09    1.70
   7   5   1   38.60    1.72
  -7   5  -1   36.43    1.72
  -7   5  -1   36.94    1.70
   7   5   1   38.45    1.71
  -7   5  -1   37.90    1.70
  -9  -5  -1    8.58    0.42
   9  -5   1    8.43    0.43
   9  -5   1    8.48    0.41
   9  -5   1    8.20    0.43
   9  -5   1    8.08    0.46
  -9  -5  -1    8.05    0.44
  -9  -5  -1    7.90    0.44
  -9  -5  -1    7.67    0.39
  -9  -5  -1    8.70    0.38
  -9   5  -1    7.82    0.41
   9   5   1    8.07    0.46
  -9   5  -1    8.56    0.42
  -9   5  -1    7.95    0.42
   9   5   1    9.01    0.43
   9   5   1    8.32    0.44
  -9   5  -1    8.09    0.46
 -11  -5  -1   29.26    1.34
 -11  -5  -1   29.05    1.31
 -11  -5  -1   29.30    1.30
  11  -5   1   30.66    1.33
  11  -5   1   31.29    1.35
 -11  -5  -1   28.97    1.36
  11  -5   1   27.98    1.34
 -11  -5  -1   29.28    1.35
 -11   5  -1   28.13    1.37
 -11   5  -1   29.00    1.34
  11   5   1   29.69    1.34
 -11   5  -1   29.81    1.33
 -11   5  -1   29.98    1.33
  11   5   1   29.79    1.36
  11   5   1   30.79    1.38
 -13  -5  -1    0.26    0.19
 -13  -5  -1    0.54    0.10
  13  -5   1    0.58    0.31
 -13  -5  -1    0.38    0.14
 -13  -5  -1    0.37    0.27
  13  -5   1    0.46    0.22
 -13  -5  -1    0.49    0.26
  13  -5   1    0.18    0.20
  13  -5   1    0.04    0.23
 -13   5  -1    0.55    0.18
  13   5   1    0.25    0.23
 -13   5  -1    0.15    0.20
  13   5   1    0.31    0.26
 -13   5  -1    0.26    0.19
 -13   5  -1    1.07    0.29
 -15  -5  -1    0.32    0.45
  15  -5   1   -0.22    0.29
  15  -5   1    0.08    0.26
 -15  -5  -1    0.07    0.12
  15  -5   1    0.15    0.34
 -15  -5  -1   -0.10    0.35
 -15  -5  -1   -0.06    0.25
  15  -5   1   -0.06    0.47
 -15  -5  -1    0.18    0.17
  15   5   1   -0.03    0.29
 -15   5  -1    0.37    0.25
 -15   5  -1   -0.12    0.25
  15   5   1    0.19    0.43
 -15   5  -1    0.08    0.22
 -15   5  -1    0.09    0.36
  16  -6  -1    9.00    0.74
 -16  -6   1    8.65    0.59
 -16  -6   1    8.38    0.65
  16  -6  -1    8.40    0.63
 -16  -6   1    8.30    0.74
 -16   6   1    9.15    0.60
 -16   6   1    8.86    0.47
  16   6  -1    8.54    0.72
 -16   6   1    8.09    0.67
  16   6  -1    8.72    0.60
 -16   6   1    9.99    0.54
  14  -6  -1    6.85    0.46
 -14  -6   1    5.84    0.53
 -14  -6   1    6.72    0.43
 -14  -6   1    6.29    0.48
  14  -6  -1    6.68    0.55
  14  -6  -1    5.85    0.45
 -14   6   1    6.43    0.45
 -14   6   1    7.15    0.51
 -14   6   1    6.95    0.35
  14   6  -1    5.20    0.44
  14   6  -1    6.73    0.54
 -14   6   1    5.84    0.41
  12  -6  -1   27.09    1.22
 -12  -6   1   27.01    1.24
  12  -6  -1   27.72    1.26
 -12  -6   1   24.63    1.22
  12  -6  -1   25.91    1.21
 -12  -6   1   26.01    1.24
  12   6  -1   27.51    1.23
 -12   6   1   26.20    1.25
 -12   6   1   27.54    1.23
  12   6  -1   26.97    1.23
 -12   6   1   25.61    1.21
  12   6  -1   27.09    1.25
 -12   6   1   26.57    1.18
 -10  -6   1   26.22    1.14
 -10  -6   1   24.48    1.13
  10  -6  -1   25.40    1.13
  10  -6  -1   24.94    1.12
  10  -6  -1   24.71    1.15
  10   6  -1   24.22    1.15
  10   6  -1   24.97    1.13
 -10   6   1   23.95    1.13
 -10   6   1   25.11    1.16
  10   6  -1   25.94    1.14
 -10   6   1   23.96    1.10
 -10   6   1   23.81    1.13
  -8  -6   1   13.63    0.65
   8  -6  -1   14.10    0.68
  -8  -6   1   14.40    0.66
   8  -6  -1   14.06    0.65
   8  -6  -1   14.70    0.65
  -8  -6   1   13.68    0.66
  -8   6   1   13.28    0.65
  -8   6   1   13.93    0.67
   8   6  -1   13.69    0.66
  -8   6   1   14.50    0.66
  -8   6   1   14.14    0.63
   8   6  -1   12.03    0.66
   8   6  -1   15.11    0.65
  -6  -6   1   36.61    1.70
   6  -6  -1   38.76    1.71
  -6  -6   1   36.62    1.69
  -6  -6   1   39.89    1.71
   6  -6  -1   39.89    1.70
   6  -6  -1   39.19    1.70
  -6   6   1   37.51    1.71
  -6   6   1   39.54    1.70
  -6   6   1   38.21    1.68
   6   6  -1   37.40    1.70
   6   6  -1   38.46    1.69
   6   6  -1   39.96    1.70
  -6   6   1   37.52    1.68
   4  -6  -1   99.44    4.57
   4  -6  -1  104.61    4.55
  -4  -6   1  104.81    4.56
  -4  -6   1  113.06    4.56
   4  -6  -1  106.69    4.57
   4  -6  -1  104.38    4.56
  -4  -6   1  104.36    4.55
  -4  -6   1   97.26    4.56
  -4  -6   1  104.53    4.54
  -4   6   1  103.85    4.56
   4   6  -1  104.46    4.55
   4   6  -1  110.33    4.57
  -4   6   1  105.55    4.57
   4   6  -1  103.88    4.56
   4   6  -1  103.39    4.54
  -4   6   1  102.84    4.54
  -2  -6   1  146.75    6.25
   2  -6  -1  147.07    6.24
  -2  -6   1  141.56    6.23
   2  -6  -1  141.71    6.25
  -2  -6   1  145.33    6.24
  -2  -6   1  144.47    6.23
  -2  -6   1  141.21    6.25
   2  -6  -1  142.42    6.25
  -2   6   1  143.03    6.25
  -2   6   1  146.03    6.25
   2   6  -1  143.23    6.23
   2   6  -1  140.72    6.26
   2   6  -1  143.46    6.24
   2   6  -1  142.22    6.25
   0  -6  -1   87.63    3.87
   0  -6   1   86.34    3.87
   0  -6  -1   90.68    3.88
   0  -6   1   92.48    3.87
   0  -6  -1   88.94    3.86
   0  -6  -1   89.99    3.86
   0  -6   1   86.19    3.87
   0  -6   1   88.36    3.86
   0  -6  -1   90.15    3.87
   0   6  -1   88.48    3.87
   0   6  -1   85.45    3.86
   0   6  -1   88.75    3.85
   0   6   1   92.05    3.88
   0   6   1   89.92    3.87
   0   6  -1   90.40    3.88
   0   6   1   88.24    3.87
   0   6   1   87.48    3.87
   0   6  -1   85.85    3.87
   0   6   1   88.89    3.87
   2  -6   1   13.39    0.56
  -2  -6  -1   11.83    0.55
   2  -6   1   12.84    0.57
  -2  -6  -1   10.75    0.56
  -2  -6  -1   12.61    0.56
  -2  -6  -1   11.77    0.57
  -2  -6  -1   12.31    0.55
   2  -6   1   12.94    0.54
   2  -6   1   11.69    0.54
   2  -6   1   11.50    0.57
   2   6   1   11.41    0.55
  -2   6  -1   12.24    0.57
  -2   6  -1   12.17    0.55
   2   6   1   13.22    0.57
   2   6   1   11.79    0.56
   2   6   1   11.64    0.55
  -2   6  -1   12.52    0.56
  -4  -6  -1    1.06    0.13
  -4  -6  -1    0.78    0.09
  -4  -6  -1    1.00    0.10
   4  -6   1    1.02    0.11
  -4  -6  -1    0.99    0.13
   4  -6   1    0.79    0.13
   4  -6   1    1.06    0.08
  -4   6  -1    0.71    0.11
   4   6   1    0.97    0.14
   4   6   1    1.26    0.11
   4   6   1    0.96    0.09
  -4   6  -1    1.00    0.13
  -6  -6  -1    1.83    0.14
  -6  -6  -1    2.79    0.16
   6  -6   1    2.44    0.21
   6  -6   1    2.42    0.17
  -6  -6  -1    2.05    0.19
  -6  -6  -1    2.49    0.19
   6  -6   1    2.06    0.14
   6   6   1    1.77    0.17
   6   6   1    2.16    0.22
  -6   6  -1    2.27    0.20
   6   6   1    2.60    0.21
  -6   6  -1    2.39    0.15
  -6   6  -1    2.55    0.19
  -6   6  -1    2.07    0.16
  -8  -6  -1   14.18    0.65
  -8  -6  -1   14.10    0.70
   8  -6   1   14.79    0.68
  -8  -6  -1   14.44    0.65
   8  -6   1   14.93    0.71
   8  -6   1   14.92    0.66
  -8  -6  -1   14.51    0.68
  -8  -6  -1   14.93    0.70
   8   6   1   14.25    0.69
  -8   6  -1   14.12    0.71
  -8   6  -1   14.12    0.68
  -8   6  -1   13.78    0.68
   8   6   1   14.71    0.71
   8   6   1   15.11    0.68
  -8   6  -1   15.14    0.67
  10  -6   1    1.83    0.25
 -10  -6  -1    1.77    0.23
 -10  -6  -1    1.89    0.13
 -10  -6  -1    1.99    0.16
 -10  -6  -1    1.79    0.21
  10  -6   1    2.03    0.29
 -10  -6  -1    1.92    0.27
  10  -6   1    1.92    0.20
 -10   6  -1    2.20    0.27
 -10   6  -1    1.77    0.21
 -10   6  -1    1.86    0.21
  10   6   1    1.84    0.24
 -10   6  -1    1.78    0.23
  10   6   1    1.78    0.27
  10   6   1    1.43    0.21
  12  -6   1   12.06    0.64
 -12  -6  -1   12.00    0.56
  12  -6   1   11.79    0.60
  12  -6   1   12.67    0.70
 -12  -6  -1   12.76    0.67
 -12  -6  -1   12.11    0.62
 -12  -6  -1   12.38    0.66
 -12  -6  -1   11.67    0.55
  12  -6   1   11.85    0.62
  12   6   1   12.18    0.70
 -12   6  -1   11.01    0.61
  12   6   1   12.15    0.65
 -12   6  -1   12.17    0.61
  12   6   1   12.07    0.64
 -12   6  -1   12.69    0.68
  14  -6   1    2.51    0.34
  14  -6   1    2.76    0.30
 -14  -6  -1    2.41    0.36
 -14  -6  -1    2.58    0.22
 -14  -6  -1    2.59    0.37
  14  -6   1    2.45    0.43
  14  -6   1    1.80    0.34
 -14  -6  -1    2.58    0.18
 -14  -6  -1    2.04    0.27
  14   6   1    2.14    0.42
 -14   6  -1    2.71    0.30
 -14   6  -1    2.73    0.34
 -14   6  -1    2.76    0.40
 -14   6  -1    2.48    0.30
 -16  -6  -1    0.07    0.15
 -16  -6  -1    0.07    0.11
 -16  -6  -1    0.18    0.43
 -16  -6  -1    0.28    0.32
  16  -6   1   -0.07    0.60
 -16   6  -1    0.05    0.27
  16   6   1    0.39    0.34
 -16   6  -1    0.46    0.31
  16   6   1    0.02    0.59
 -16   6  -1   -0.16    0.46
 -16   6  -1   -0.29    0.31
  17  -7  -1    3.55    0.69
 -17  -7   1    3.89    0.50
 -17  -7   1    3.34    0.52
 -17   7   1    3.45    0.31
 -17   7   1    4.05    0.43
 -17   7   1    3.99    0.46
  17   7  -1    3.95    0.54
 -17   7   1    4.02    0.57
 -15  -7   1    0.10    0.33
 -15  -7   1    0.20    0.36
  15  -7  -1    0.00    0.28
 -15  -7   1   -0.05    0.25
  15  -7  -1    0.31    0.34
  15  -7  -1    0.14    0.43
 -15   7   1    0.02    0.23
 -15   7   1    0.28    0.35
  15   7  -1    0.24    0.30
 -15   7   1    0.03    0.26
  15   7  -1    0.31    0.43
 -15   7   1    0.17    0.15
 -13  -7   1   15.51    0.78
  13  -7  -1   14.21    0.74
  13  -7  -1   13.52    0.80
  13  -7  -1   14.96    0.74
 -13  -7   1   14.72    0.74
 -13  -7   1   15.15    0.80
  13   7  -1   14.87    0.76
 -13   7   1   14.50    0.79
 -13   7   1   15.01    0.75
  13   7  -1   15.88    0.75
 -13   7   1   14.21    0.67
 -13   7   1   13.68    0.72
  13   7  -1   13.99    0.79
  11  -7  -1    0.90    0.25
 -11  -7   1    1.10    0.23
  11  -7  -1    0.86    0.20
  11  -7  -1    1.28    0.18
 -11  -7   1    1.10    0.21
 -11  -7   1    0.71    0.17
  11   7  -1    1.05    0.20
  11   7  -1    0.88    0.23
  11   7  -1    1.30    0.20
 -11   7   1    0.98    0.17
 -11   7   1    1.13    0.24
 -11   7   1    1.16    0.18
   9  -7  -1   19.24    0.85
   9  -7  -1   18.25    0.84
  -9  -7   1   18.17    0.85
   9  -7  -1   18.03    0.87
  -9  -7   1   17.29    0.83
  -9  -7   1   17.83    0.85
   9   7  -1   17.41    0.85
  -9   7   1   18.65    0.84
  -9   7   1   18.50    0.81
  -9   7   1   17.51    0.84
   9   7  -1   18.47    0.86
   9   7  -1   18.14    0.84
  -9   7   1   18.01    0.87
  -9   7   1   17.68    0.81
  -7  -7   1    6.88    0.38
  -7  -7   1    6.67    0.35
   7  -7  -1    7.35    0.39
  -7  -7   1    6.67    0.36
   7  -7  -1    6.82    0.35
   7  -7  -1    7.08    0.35
  -7  -7   1    6.88    0.38
   7   7  -1    6.52    0.36
   7   7  -1    7.29    0.38
  -7   7   1    6.67    0.33
   7   7  -1    7.59    0.35
  -7   7   1    6.81    0.38
  -7   7   1    6.64    0.36
  -7   7   1    6.74    0.32
  -5  -7   1   37.99    1.62
   5  -7  -1   37.63    1.66
   5  -7  -1   37.40    1.66
   5  -7  -1   37.67    1.64
  -5  -7   1   37.25    1.65
  -5  -7   1   38.87    1.66
  -5  -7   1   37.12    1.65
   5  -7  -1   37.84    1.65
  -5  -7   1   37.71    1.64
   5   7  -1   35.67    1.65
   5   7  -1   36.57    1.63
  -5   7   1   35.71    1.63
   5   7  -1   35.33    1.65
   5   7  -1   37.62    1.64
  -5   7   1   40.01    1.66
  -5   7   1   35.02    1.65
  -3  -7   1   24.64    1.10
   3  -7  -1   25.23    1.12
   3  -7  -1   24.78    1.10
   3  -7  -1   24.18    1.12
  -3  -7   1   24.75    1.10
  -3  -7   1   25.09    1.12
   3  -7  -1   26.10    1.11
   3  -7  -1   25.26    1.11
  -3  -7   1   24.82    1.12
  -3  -7   1   26.37    1.12
  -3   7   1   24.90    1.10
   3   7  -1   26.01    1.12
   3   7  -1   23.78    1.11
   3   7  -1   25.27    1.10
  -3   7   1   24.71    1.12
   3   7  -1   24.59    1.10
  -3   7   1   23.66    1.11
  -1  -7   1   15.12    0.75
   1  -7  -1   16.59    0.74
   1  -7  -1   16.76    0.76
  -1  -7   1   16.67    0.75
  -1  -7   1   16.60    0.75
  -1  -7   1   16.99    0.74
  -1  -7   1   17.05    0.73
   1  -7  -1   15.66    0.75
   1  -7  -1   16.77    0.74
   1  -7  -1   17.50    0.75
  -1   7   1   17.14    0.74
   1   7  -1   15.59    0.74
   1   7  -1   16.43    0.75
  -1   7   1   16.93    0.76
   1   7  -1   15.64    0.75
  -1   7   1   16.63    0.75
   1   7  -1   16.93    0.76
   1   7  -1   16.16    0.73
  -1   7   1   16.65    0.76
  -1   7   1   16.70    0.74
   1  -7   1    1.90    0.16
   1  -7   1    2.31    0.14
  -1  -7  -1    1.89    0.15
  -1  -7  -1    2.31    0.16
  -1  -7  -1    2.00    0.14
   1  -7   1    2.27    0.16
   1  -7   1    2.15    0.11
  -1  -7  -1    2.33    0.13
  -1  -7  -1    2.02    0.17
  -1   7  -1    2.55    0.14
   1   7   1    2.18    0.17
   1   7   1    1.73    0.14
  -1   7  -1    2.22    0.18
   1   7   1    2.24    0.14
  -1   7  -1    2.07    0.16
  -1   7  -1    2.29    0.14
   1   7   1    1.70    0.14
  -3  -7  -1    2.34    0.18
   3  -7   1    2.48    0.14
   3  -7   1    2.20    0.13
   3  -7   1    2.97    0.20
  -3  -7  -1    2.57    0.15
  -3  -7  -1    2.81    0.15
  -3  -7  -1    2.43    0.19
   3  -7   1    2.77    0.17
  -3  -7  -1    2.51    0.18
   3  -7   1    2.75    0.19
  -3   7  -1    2.51    0.16
   3   7   1    2.58    0.19
   3   7   1    2.46    0.17
   3   7   1    2.79    0.22
  -3   7  -1    2.62    0.18
   3   7   1    2.52    0.16
  -3   7  -1    2.59    0.19
   5  -7   1    0.91    0.12
  -5  -7  -1    0.80    0.13
   5  -7   1    0.81    0.14
   5  -7   1    0.76    0.09
   5  -7   1    1.02    0.15
  -5  -7  -1    0.59    0.08
  -5  -7  -1    0.89    0.13
  -5  -7  -1    0.68    0.09
  -5   7  -1    0.66    0.10
   5   7   1    0.78    0.12
  -5   7  -1    0.75    0.13
   5   7   1    0.55    0.11
  -5   7  -1    0.69    0.13
   5   7   1    0.91    0.15
   5   7   1    0.71    0.08
  -5   7  -1    0.90    0.10
  -7  -7  -1  100.55    4.42
  -7  -7  -1  100.58    4.44
   7  -7   1  102.78    4.44
   7  -7   1  102.70    4.43
   7  -7   1  103.80    4.46
  -7  -7  -1  100.84    4.45
  -7  -7  -1  102.78    4.45
   7   7   1   97.33    4.45
  -7   7  -1  103.80    4.46
  -7   7  -1  101.62    4.43
  -7   7  -1  103.12    4.44
   7   7   1  100.66    4.46
   7   7   1  101.36    4.44
  -7   7  -1  101.25    4.44
   9  -7   1   58.22    2.76
  -9  -7  -1   61.81    2.70
  -9  -7  -1   61.38    2.65
  -9  -7  -1   62.68    2.70
  -9  -7  -1   59.96    2.68
   9  -7   1   60.97    2.69
  -9  -7  -1   60.09    2.66
   9  -7   1   58.32    2.67
   9   7   1   61.98    2.69
   9   7   1   59.96    2.71
  -9   7  -1   61.76    2.68
  -9   7  -1   61.42    2.69
  -9   7  -1   61.09    2.71
   9   7   1   61.80    2.70
  -9   7  -1   61.54    2.68
 -11  -7  -1    4.09    0.24
  11  -7   1    3.93    0.35
 -11  -7  -1    5.47    0.40
  11  -7   1    4.11    0.30
  11  -7   1    4.40    0.42
 -11  -7  -1    4.62    0.23
 -11  -7  -1    4.34    0.37
 -11  -7  -1    4.87    0.31
 -11   7  -1    4.47    0.39
  11   7   1    4.38    0.41
 -11   7  -1    4.42    0.32
 -11   7  -1    4.28    0.32
  11   7   1    4.10    0.36
 -11   7  -1    4.07    0.30
  13  -7   1    0.14    0.38
 -13  -7  -1    0.15    0.21
  13  -7   1    0.18    0.22
 -13  -7  -1    0.37    0.28
 -13  -7  -1    0.29    0.32
 -13  -7  -1    0.12    0.11
  13  -7   1   -0.01    0.28
 -13  -7  -1    0.16    0.08
  13   7   1    0.46    0.36
 -13   7  -1   -0.08    0.21
 -13   7  -1    0.33    0.22
 -13   7  -1   -0.02    0.29
  13   7   1    0.04    0.24
 -13   7  -1    0.00    0.19
 -15  -7  -1    0.15    0.27
 -15  -7  -1    0.03    0.13
  15  -7   1    0.31    0.50
  15  -7   1   -0.41    0.30
 -15  -7  -1   -0.06    0.40
 -15  -7  -1    0.02    0.08
 -15   7  -1    0.04    0.40
  15   7   1    0.00    0.33
 -15   7  -1   -0.06    0.24
 -15   7  -1    0.07    0.26
 -15   7  -1   -0.27    0.27
  15   7   1    0.23    0.51
 -16  -8   1    0.14    0.31
 -16  -8   1    1.01    0.46
  16  -8  -1    0.83    0.56
 -16   8   1    0.79    0.16
 -16   8   1    0.77    0.17
 -16   8   1    0.88    0.44
  16   8  -1    1.13    0.34
  16   8  -1    0.86    0.52
 -16   8   1    0.73    0.30
 -16   8   1    0.82    0.33
 -14  -8   1    7.38    0.56
  14  -8  -1    7.60    0.56
 -14  -8   1    8.17    0.63
 -14  -8   1    7.27    0.50
  14  -8  -1    6.77    0.67
 -14   8   1    7.92    0.40
 -14   8   1    8.79    0.52
 -14   8   1    7.72    0.39
 -14   8   1    7.17    0.58
 -14   8   1    8.59    0.52
  14   8  -1    7.39    0.63
  12  -8  -1   13.04    0.67
 -12  -8   1   13.72    0.80
 -12  -8   1   12.05    0.66
  12  -8  -1   13.03    0.75
  12  -8  -1   13.43    0.71
 -12   8   1   13.39    0.61
  12   8  -1   13.21    0.72
 -12   8   1   13.70    0.67
 -12   8   1   13.51    0.68
 -12   8   1   13.35    0.61
  12   8  -1   13.22    0.68
  12   8  -1   12.09    0.68
 -12   8   1   13.88    0.73
 -10  -8   1    9.90    0.59
 -10  -8   1   10.76    0.55
  10  -8  -1   10.99    0.57
  10  -8  -1   10.78    0.61
  10  -8  -1   10.34    0.54
 -10  -8   1   10.10    0.56
 -10   8   1   11.94    0.59
  10   8  -1   12.40    0.60
 -10   8   1   10.77    0.50
 -10   8   1   11.05    0.55
  10   8  -1   11.21    0.56
 -10   8   1   11.23    0.51
  10   8  -1    9.71    0.56
  -8  -8   1    0.56    0.12
  -8  -8   1    0.38    0.14
   8  -8  -1    0.69    0.14
  -8  -8   1    0.57    0.17
   8  -8  -1    0.36    0.18
   8  -8  -1    0.55    0.15
  -8  -8   1    0.49    0.18
  -8   8   1    0.58    0.18
   8   8  -1    0.45    0.13
  -8   8   1    0.43    0.08
  -8   8   1    0.43    0.11
   8   8  -1    0.48    0.14
  -8   8   1    0.33    0.13
   8   8  -1    0.42    0.17
   6  -8  -1    1.33    0.15
  -6  -8   1    1.35    0.09
  -6  -8   1    1.10    0.13
   6  -8  -1    1.33    0.18
  -6  -8   1    1.63    0.18
  -6  -8   1    1.09    0.16
   6  -8  -1    1.36    0.18
   6  -8  -1    1.43    0.16
  -6  -8   1    1.57    0.18
  -6   8   1    1.63    0.18
  -6   8   1    1.23    0.14
  -6   8   1    1.21    0.15
   6   8  -1    1.17    0.16
   6   8  -1    1.61    0.15
   6   8  -1    1.25    0.09
   6   8  -1    1.01    0.16
  -6   8   1    1.31    0.11
  -4  -8   1   19.34    0.84
   4  -8  -1   17.85    0.85
  -4  -8   1   17.35    0.86
  -4  -8   1   19.60    0.87
   4  -8  -1   19.15    0.85
  -4  -8   1   18.71    0.84
   4  -8  -1   20.05    0.88
   4  -8  -1   18.17    0.87
  -4   8   1   18.50    0.87
   4   8  -1   18.19    0.86
   4   8  -1   19.78    0.87
  -4   8   1   18.90    0.86
  -4   8   1   18.90    0.84
   4   8  -1   19.34    0.84
   4   8  -1   19.42    0.85
  -2  -8   1   13.24    0.61
  -2  -8   1   13.34    0.60
   2  -8  -1   13.09    0.59
   2  -8  -1   12.94    0.61
   2  -8  -1   12.54    0.58
  -2  -8   1   12.59    0.57
  -2  -8   1   13.18    0.60
  -2  -8   1   13.06    0.58
   2  -8  -1   12.95    0.59
   2  -8  -1   12.32    0.61
   2   8  -1   12.42    0.59
   2   8  -1   12.06    0.60
  -2   8   1   13.12    0.61
   2   8  -1   12.83    0.58
   2   8  -1   12.60    0.58
  -2   8   1   12.89    0.61
  -2   8   1   13.15    0.61
   2   8  -1   12.20    0.61
  -2   8   1   12.60    0.58
   0  -8  -1    4.21    0.23
   0  -8  -1    4.27    0.21
   0  -8  -1    4.37    0.25
   0  -8   1    3.55    0.24
   0  -8   1    4.15    0.25
   0  -8  -1    4.21    0.24
   0  -8   1    3.87    0.20
   0  -8   1    4.23    0.24
   0  -8  -1    4.09    0.23
   0  -8   1    4.06    0.22
   0   8  -1    4.34    0.24
   0   8   1    4.13    0.23
   0   8   1    4.18    0.25
   0   8  -1    4.45    0.26
   0   8  -1    3.87    0.23
   0   8   1    4.44    0.22
   0   8  -1    3.69    0.20
   0   8  -1    4.48    0.22
   0   8   1    4.03    0.22
   0   8   1    4.38    0.26
   2  -8   1   10.29    0.47
  -2  -8  -1   10.39    0.49
  -2  -8  -1   10.01    0.48
  -2  -8  -1   10.11    0.46
   2  -8   1   10.42    0.49
  -2  -8  -1    9.13    0.46
   2  -8   1    9.74    0.44
  -2  -8  -1    9.59    0.48
   2  -8   1   10.24    0.49
   2  -8   1   10.09    0.45
   2   8   1    8.76    0.46
   2   8   1   10.65    0.49
  -2   8  -1   10.42    0.47
   2   8   1    8.87    0.47
  -2   8  -1   10.67    0.47
   2   8   1   10.04    0.47
  -2   8  -1    9.59    0.48
   4  -8   1   11.50    0.50
  -4  -8  -1   11.14    0.51
   4  -8   1   11.42    0.52
   4  -8   1   11.06    0.49
   4  -8   1    9.84    0.54
  -4  -8  -1   10.52    0.50
  -4  -8  -1   11.23    0.54
  -4  -8  -1   10.19    0.53
  -4  -8  -1   11.00    0.53
   4  -8   1   11.30    0.54
   4   8   1   11.56    0.53
   4   8   1   11.71    0.54
   4   8   1   11.22    0.52
  -4   8  -1   10.65    0.54
  -4   8  -1   11.20    0.53
  -4   8  -1   10.22    0.51
  -4   8  -1   10.89    0.52
   4   8   1   10.38    0.51
   6  -8   1   42.16    1.87
   6  -8   1   42.44    1.91
   6  -8   1   42.68    1.91
  -6  -8  -1   41.18    1.90
  -6  -8  -1   44.30    1.87
   6  -8   1   43.51    1.89
  -6  -8  -1   41.73    1.90
  -6  -8  -1   42.15    1.88
   6   8   1   42.90    1.91
  -6   8  -1   42.40    1.89
  -6   8  -1   41.24    1.91
  -6   8  -1   41.91    1.88
   6   8   1   45.23    1.89
  -6   8  -1   43.05    1.89
   6   8   1   43.13    1.90
  -8  -8  -1    5.46    0.36
  -8  -8  -1    5.88    0.37
  -8  -8  -1    6.04    0.29
  -8  -8  -1    5.71    0.32
  -8  -8  -1    5.68    0.29
   8  -8   1    6.10    0.36
   8  -8   1    5.71    0.30
   8   8   1    4.76    0.35
  -8   8  -1    5.14    0.32
  -8   8  -1    6.37    0.35
  -8   8  -1    5.68    0.38
   8   8   1    5.93    0.40
  -8   8  -1    6.51    0.34
   8   8   1    6.43    0.36
  10  -8   1   25.96    1.17
 -10  -8  -1   24.98    1.18
 -10  -8  -1   24.90    1.10
  10  -8   1   25.09    1.13
  10  -8   1   25.66    1.20
 -10  -8  -1   26.04    1.18
 -10  -8  -1   24.02    1.15
 -10  -8  -1   25.02    1.11
 -10   8  -1   24.03    1.15
  10   8   1   24.84    1.16
 -10   8  -1   24.74    1.19
 -10   8  -1   25.02    1.15
  10   8   1   25.44    1.17
 -10   8  -1   24.00    1.14
  10   8   1   25.88    1.19
  12  -8   1   16.02    0.83
 -12  -8  -1   16.92    0.85
 -12  -8  -1   16.49    0.72
  12  -8   1   15.98    0.77
 -12  -8  -1   17.00    0.90
  12  -8   1   15.96    0.90
 -12  -8  -1   16.34    0.71
 -12  -8  -1   15.70    0.84
 -12   8  -1   16.10    0.78
 -12   8  -1   16.46    0.83
 -12   8  -1   15.90    0.86
  12   8   1   15.65    0.85
  12   8   1   15.26    0.82
 -12   8  -1   15.15    0.79
 -14  -8  -1    0.17    0.35
  14  -8   1    0.39    0.49
 -14  -8  -1    0.07    0.24
  14  -8   1    0.09    0.26
 -14   8  -1   -0.19    0.23
 -14   8  -1   -0.01    0.38
  14   8   1    0.31    0.31
  14   8   1    0.00    0.46
 -14   8  -1   -0.11    0.25
 -14   8  -1    0.34    0.25
 -15  -9   1    4.56    0.47
  15  -9  -1    4.86    0.51
  15  -9  -1    5.72    0.66
 -15  -9   1    4.96    0.57
 -15   9   1    5.09    0.45
 -15   9   1    4.85    0.29
 -15   9   1    4.25    0.59
 -15   9   1    4.73    0.50
  15   9  -1    4.39    0.63
 -15   9   1    4.91    0.29
  15   9  -1    6.23    0.52
  13  -9  -1    0.12    0.25
 -13  -9   1   -0.09    0.21
 -13  -9   1   -0.03    0.35
 -13  -9   1    0.16    0.26
  13  -9  -1    0.00    0.30
  13  -9  -1    0.15    0.39
 -13   9   1    0.06    0.11
 -13   9   1    0.10    0.32
 -13   9   1    0.13    0.13
  13   9  -1    0.02    0.32
  11  -9  -1    2.05    0.27
 -11  -9   1    3.37    0.53
 -11  -9   1    2.19    0.31
 -11  -9   1    1.94    0.25
  11  -9  -1    1.98    0.33
 -11   9   1    1.86    0.19
  11   9  -1    2.13    0.27
 -11   9   1    1.88    0.28
 -11   9   1    1.67    0.16
 -11   9   1    1.68    0.23
  11   9  -1    1.84    0.27
  11   9  -1    2.32    0.32
   9  -9  -1    5.72    0.41
   9  -9  -1    5.73    0.38
   9  -9  -1    6.27    0.41
  -9  -9   1    5.82    0.34
  -9  -9   1    5.41    0.37
  -9  -9   1    5.69    0.41
  -9  -9   1    6.37    0.42
   9  -9  -1    6.01    0.35
   9   9  -1    6.52    0.37
  -9   9   1    5.88    0.40
  -9   9   1    5.71    0.29
  -9   9   1    5.72    0.32
   9   9  -1    5.67    0.36
  -9   9   1    5.18    0.34
   9   9  -1    5.51    0.40
  -7  -9   1    1.04    0.12
  -7  -9   1    0.99    0.18
   7  -9  -1    1.48    0.18
  -7  -9   1    1.29    0.09
  -7  -9   1    1.23    0.19
   7  -9  -1    1.51    0.22
  -7  -9   1    1.28    0.19
   7  -9  -1    1.29    0.20
   7  -9  -1    1.32    0.15
   7   9  -1    1.01    0.09
  -7   9   1    1.09    0.14
  -7   9   1    0.98    0.12
   7   9  -1    0.91    0.19
  -7   9   1    0.93    0.16
   7   9  -1    1.07    0.15
  -7   9   1    1.23    0.19
   7   9  -1    1.22    0.16
   5  -9  -1   29.90    1.34
  -5  -9   1   30.67    1.32
  -5  -9   1   29.82    1.36
   5  -9  -1   29.67    1.33
  -5  -9   1   30.51    1.33
  -5  -9   1   29.65    1.35
  -5  -9   1   30.66    1.35
   5  -9  -1   30.55    1.37
   5  -9  -1   30.44    1.34
   5  -9  -1   28.90    1.36
  -5   9   1   29.97    1.36
  -5   9   1   29.79    1.32
  -5   9   1   30.41    1.34
   5   9  -1   29.15    1.35
   5   9  -1   30.30    1.33
   5   9  -1   30.06    1.36
   5   9  -1   29.31    1.32
  -3  -9   1    1.10    0.10
  -3  -9   1    0.89    0.14
   3  -9  -1    1.04    0.15
   3  -9  -1    1.22    0.12
  -3  -9   1    1.14    0.14
  -3  -9   1    1.14    0.11
   3  -9  -1    1.44    0.14
  -3  -9   1    1.08    0.15
   3  -9  -1    1.07    0.16
   3  -9  -1    0.98    0.16
  -3   9   1    1.22    0.16
   3   9  -1    1.17    0.11
  -3   9   1    1.17    0.14
   3   9  -1    0.89    0.12
  -3   9   1    0.99    0.12
   3   9  -1    1.45    0.15
   3   9  -1    1.25    0.16
   1  -9  -1   78.40    3.44
  -1  -9   1   79.51    3.42
   1  -9  -1   79.04    3.44
   1  -9  -1   79.47    3.42
  -1  -9   1   81.87    3.44
   1  -9  -1   78.56    3.42
  -1  -9   1   73.86    3.43
   1  -9  -1   78.22    3.43
  -1  -9   1   79.46    3.44
  -1  -9   1   79.99    3.41
   1   9  -1   80.14    3.44
  -1   9   1   77.28    3.43
  -1   9   1   78.55    3.42
  -1   9   1   75.89    3.44
   1   9  -1   76.96    3.42
   1   9  -1   79.59    3.44
   1   9  -1   76.29    3.43
   1   9  -1   78.50    3.41
  -1   9   1   76.10    3.42
  -1   9   1   78.18    3.44
  -1  -9  -1    1.63    0.20
  -1  -9  -1    1.50    0.14
   1  -9   1    1.72    0.10
   1  -9   1    1.70    0.18
   1  -9   1    1.53    0.19
  -1  -9  -1    1.98    0.18
  -1  -9  -1    1.70    0.17
   1  -9   1    1.56    0.20
  -1  -9  -1    1.72    0.13
   1  -9   1    1.95    0.16
  -1   9  -1    1.81    0.18
  -1   9  -1    1.62    0.15
   1   9   1    1.48    0.19
   1   9   1    1.76    0.16
   1   9   1    1.88    0.16
  -1   9  -1    1.92    0.21
   1   9   1    1.39    0.14
   1   9   1    1.92    0.18
  -1   9  -1    1.57    0.15
   3  -9   1   15.67    0.69
   3  -9   1   15.62    0.72
  -3  -9  -1   15.60    0.71
  -3  -9  -1   16.60    0.73
   3  -9   1   15.05    0.74
   3  -9   1   15.94    0.74
  -3  -9  -1   15.52    0.74
  -3  -9  -1   15.18    0.73
  -3  -9  -1   16.41    0.71
   3  -9   1   14.74    0.70
   3   9   1   15.13    0.72
   3   9   1   16.13    0.72
  -3   9  -1   14.82    0.74
   3   9   1   16.24    0.71
   3   9   1   16.95    0.75
  -3   9  -1   15.55    0.72
  -3   9  -1   14.36    0.73
   5  -9   1    0.46    0.08
   5  -9   1    0.55    0.14
   5  -9   1    0.28    0.15
   5  -9   1    0.37    0.08
  -5  -9  -1    0.31    0.14
  -5  -9  -1    0.46    0.09
  -5  -9  -1    0.46    0.10
  -5  -9  -1    0.38    0.17
  -5  -9  -1    0.43    0.15
   5  -9   1    0.34    0.17
  -5   9  -1    0.23    0.11
   5   9   1    0.35    0.12
  -5   9  -1    0.15    0.10
   5   9   1    0.16    0.16
  -5   9  -1    0.23    0.15
  -5   9  -1    0.12    0.14
   5   9   1    0.53    0.09
   5   9   1    0.33    0.13
   7  -9   1    6.71    0.41
   7  -9   1    6.61    0.38
  -7  -9  -1    6.43    0.34
  -7  -9  -1    6.23    0.32
  -7  -9  -1    6.58    0.41
  -7  -9  -1    6.40    0.39
   7  -9   1    7.10    0.43
   7  -9   1    6.41    0.32
  -7  -9  -1    6.26    0.43
   7   9   1    6.47    0.38
   7   9   1    6.98    0.42
   7   9   1    6.37    0.37
  -7   9  -1    6.77    0.41
  -7   9  -1    6.65    0.38
  -7   9  -1    5.87    0.35
   9  -9   1    5.29    0.29
   9  -9   1    4.90    0.37
  -9  -9  -1    5.84    0.38
  -9  -9  -1    4.81    0.26
  -9  -9  -1    5.08    0.39
  -9  -9  -1    4.56    0.32
  -9  -9  -1    4.94    0.26
   9  -9   1    5.58    0.43
  -9   9  -1    5.35    0.39
  -9   9  -1    4.79    0.35
  -9   9  -1    4.33    0.32
   9   9   1    5.07    0.36
  -9   9  -1    4.73    0.31
   9   9   1    5.30    0.38
   9   9   1    5.11    0.41
 -11  -9  -1    2.35    0.34
  11  -9   1    1.91    0.24
 -11  -9  -1    1.37    0.13
 -11  -9  -1    1.50    0.14
 -11  -9  -1    1.53    0.22
  11  -9   1    1.97    0.30
  11  -9   1    1.85    0.37
 -11  -9  -1    2.07    0.31
  11   9   1    1.27    0.37
 -11   9  -1    1.83    0.22
 -11   9  -1    1.78    0.23
 -11   9  -1    1.08    0.29
  11   9   1    1.56    0.26
  11   9   1    2.02    0.31
  13  -9   1   -0.13    0.22
  13  -9   1    0.03    0.46
 -13  -9  -1    0.28    0.24
 -13  -9  -1   -0.03    0.31
 -13   9  -1    0.00    0.22
  13   9   1    0.24    0.45
  13   9   1   -0.19    0.27
 -13   9  -1   -0.19    0.34
 -13   9  -1    0.08    0.25
 -13   9  -1   -0.04    0.23
 -15  -9  -1    0.30    0.30
  15  -9   1   -0.32    0.64
  15  -9   1    0.16    0.33
 -15  -9  -1    0.49    0.47
 -15   9  -1   -0.15    0.45
 -15   9  -1    0.30    0.33
  15   9   1    0.47    0.38
  15   9   1    0.14    0.59
 -15   9  -1    0.45    0.30
 -15   9  -1    0.13    0.29
  14 -10  -1    9.92    0.82
  14 -10  -1   11.40    0.68
 -14 -10   1   10.50    0.63
 -14  10   1    9.79    0.63
  14  10  -1   11.10    0.67
  14  10  -1    9.81    0.77
 -14  10   1   10.59    0.51
 -14  10   1   10.49    0.50
 -14  10   1   11.81    0.76
 -12 -10   1    6.08    0.45
 -12 -10   1    6.40    0.48
  12 -10  -1    5.11    0.48
  12 -10  -1    6.09    0.57
 -12 -10   1    6.09    0.53
  12 -10  -1    7.05    0.43
 -12 -10   1    5.78    0.57
 -12  10   1    6.14    0.32
  12  10  -1    6.22    0.50
  12  10  -1    6.52    0.55
 -12  10   1    6.79    0.53
 -12  10   1    5.97    0.34
  12  10  -1    5.58    0.53
  10 -10  -1    1.00    0.27
 -10 -10   1    1.62    0.48
 -10 -10   1    1.48    0.20
  10 -10  -1    1.39    0.35
  10 -10  -1    1.44    0.20
 -10 -10   1    1.54    0.29
 -10 -10   1    0.96    0.24
  10 -10  -1    1.61    0.33
  10  10  -1    1.11    0.27
  10  10  -1    1.11    0.23
  10  10  -1    1.27    0.22
 -10  10   1    1.50    0.27
 -10  10   1    1.38    0.15
 -10  10   1    1.57    0.16
 -10  10   1    0.89    0.20
   8 -10  -1    9.72    0.58
  -8 -10   1   10.32    0.46
  -8 -10   1   11.27    0.58
  -8 -10   1   10.64    0.54
  -8 -10   1    9.54    0.51
   8 -10  -1   10.12    0.57
  -8 -10   1   10.79    0.58
   8 -10  -1   10.53    0.53
   8  10  -1   10.00    0.52
  -8  10   1   11.50    0.57
  -8  10   1    9.02    0.52
   8  10  -1   10.22    0.54
  -8  10   1   10.13    0.48
   8  10  -1   11.15    0.57
  -8  10   1    9.48    0.50
  -6 -10   1    1.51    0.22
  -6 -10   1    1.44    0.12
   6 -10  -1    1.73    0.23
  -6 -10   1    1.50    0.18
   6 -10  -1    2.03    0.20
  -6 -10   1    1.67    0.16
   6 -10  -1    1.51    0.16
  -6 -10   1    1.57    0.21
   6  10  -1    1.44    0.19
  -6  10   1    1.85    0.24
   6  10  -1    1.44    0.13
   6  10  -1    1.78    0.23
   6  10  -1    1.48    0.18
  -6  10   1    1.37    0.17
  -6  10   1    1.23    0.14
  -4 -10   1    1.76    0.22
  -4 -10   1    1.70    0.24
  -4 -10   1    1.70    0.15
   4 -10  -1    1.83    0.18
  -4 -10   1    1.69    0.18
   4 -10  -1    1.49    0.22
   4 -10  -1    1.75    0.24
  -4 -10   1    1.91    0.14
   4 -10  -1    1.80    0.18
   4 -10  -1    1.89    0.15
  -4  10   1    1.62    0.18
   4  10  -1    1.53    0.14
  -4  10   1    1.96    0.15
   4  10  -1    1.44    0.18
   4  10  -1    1.58    0.21
   4  10  -1    1.87    0.16
  -4  10   1    1.82    0.22
   2 -10  -1   80.80    3.54
  -2 -10   1   78.08    3.54
   2 -10  -1   80.37    3.57
   2 -10  -1   83.54    3.55
  -2 -10   1   83.46    3.57
   2 -10  -1   82.97    3.56
  -2 -10   1   81.88    3.54
   2 -10  -1   81.00    3.57
  -2 -10   1   83.88    3.57
  -2 -10   1   80.86    3.56
  -2  10   1   81.97    3.57
   2  10  -1   80.59    3.54
   2  10  -1   79.05    3.56
  -2  10   1   78.60    3.56
   2  10  -1   80.00    3.57
   2  10  -1   81.23    3.55
  -2  10   1   82.79    3.58
   2  10  -1   80.21    3.57
   0 -10   1  253.56   10.73
   0 -10   1  248.52   10.71
   0 -10  -1  251.87   10.72
   0 -10   1  249.99   10.69
   0 -10   1  233.93   10.71
   0 -10  -1  241.15   10.71
   0 -10  -1  253.31   10.70
   0 -10  -1  241.81   10.72
   0  10   1  239.22   10.71
   0  10   1  249.29   10.70
   0  10   1  242.91   10.70
   0  10  -1  247.34   10.72
   0  10  -1  243.62   10.70
   0  10  -1  246.30   10.69
   0  10  -1  249.56   10.71
   0  10  -1  250.46   10.70
   0  10   1  246.36   10.72
   0  10   1  242.33   10.70
  -2 -10  -1    8.16    0.45
   2 -10   1    9.46    0.43
   2 -10   1    9.32    0.46
  -2 -10  -1    8.60    0.41
  -2 -10  -1    8.77    0.44
  -2 -10  -1    8.81    0.42
  -2 -10  -1    8.94    0.47
   2 -10   1    7.81    0.40
   2 -10   1    8.20    0.48
   2 -10   1    8.21    0.39
   2  10   1    8.79    0.43
   2  10   1    8.57    0.47
   2  10   1    8.45    0.43
  -2  10  -1    7.88    0.42
  -2  10  -1    8.19    0.42
   2  10   1    9.07    0.44
  -2  10  -1    7.83    0.45
   4 -10   1    0.22    0.07
   4 -10   1    0.28    0.14
  -4 -10  -1    0.50    0.18
  -4 -10  -1    0.08    0.14
   4 -10   1    0.06    0.15
   4 -10   1    0.28    0.21
  -4 -10  -1    0.41    0.16
  -4 -10  -1    0.30    0.10
  -4 -10  -1    0.22    0.09
   4 -10   1    0.20    0.08
  -4  10  -1    0.20    0.10
   4  10   1   -0.07    0.12
   4  10   1    0.23    0.12
   4  10   1    0.24    0.18
   4  10   1    0.13    0.10
  -4  10  -1    0.18    0.15
  -4  10  -1    0.34    0.12
   6 -10   1    1.34    0.14
  -6 -10  -1    1.19    0.20
   6 -10   1    1.21    0.19
   6 -10   1    1.33    0.23
  -6 -10  -1    1.46    0.16
  -6 -10  -1    1.11    0.12
  -6 -10  -1    1.43    0.24
   6 -10   1    0.85    0.21
   6 -10   1    1.14    0.13
  -6 -10  -1    1.66    0.22
  -6  10  -1    1.61    0.21
  -6  10  -1    1.55    0.17
   6  10   1    0.93    0.17
  -6  10  -1    1.40    0.16
  -6  10  -1    1.33    0.21
   6  10   1    1.08    0.22
   6  10   1    1.19    0.13
   6  10   1    1.14    0.17
   8 -10   1   22.82    0.99
  -8 -10  -1   23.77    1.07
   8 -10   1   22.07    1.07
  -8 -10  -1   21.82    1.02
  -8 -10  -1   21.23    1.05
   8 -10   1   22.04    1.04
   8 -10   1   22.45    1.07
  -8 -10  -1   22.88    1.06
  -8 -10  -1   22.18    0.99
  -8  10  -1   21.59    1.01
   8  10   1   22.48    1.08
  -8  10  -1   23.22    1.04
  -8  10  -1   21.57    1.06
   8  10   1   21.61    1.04
  -8  10  -1   21.24    1.03
   8  10   1   21.42    1.04
  10 -10   1   22.78    1.06
 -10 -10  -1   21.03    0.97
 -10 -10  -1   23.38    1.03
  10 -10   1   22.28    1.09
  10 -10   1   22.16    1.10
  10 -10   1   22.21    1.00
 -10 -10  -1   22.00    1.07
 -10 -10  -1   22.09    0.97
 -10 -10  -1   21.47    1.06
  10  10   1   22.32    1.05
 -10  10  -1   21.86    1.01
  10  10   1   21.44    1.06
 -10  10  -1   21.72    1.08
  10  10   1   22.02    1.10
 -10  10  -1   21.95    1.04
 -10  10  -1   20.63    1.15
  12 -10   1    2.94    0.32
 -12 -10  -1    3.09    0.15
 -12 -10  -1    3.25    0.44
  12 -10   1    3.39    0.49
 -12 -10  -1    2.66    0.35
  12  10   1    3.38    0.46
 -12  10  -1    3.05    0.38
 -12  10  -1    2.99    0.30
 -12  10  -1    2.37    0.39
  12  10   1    2.65    0.34
 -12  10  -1    3.47    0.35
  14 -10   1    4.47    0.45
  14 -10   1    3.73    0.66
 -14 -10  -1    3.74    0.42
 -14 -10  -1    3.11    0.46
  14  10   1    4.22    0.63
 -14  10  -1    3.78    0.45
 -14  10  -1    4.38    0.45
 -14  10  -1    4.45    0.38
 -14  10  -1    3.80    0.43
 -14  10  -1    3.81    0.53
  14  10   1    4.51    0.54
  13 -11  -1    4.47    0.55
  13 -11  -1    3.58    0.41
 -13 -11   1    3.32    0.37
 -13 -11   1    2.50    0.37
  13 -11  -1    2.40    0.44
 -13  11   1    3.61    0.38
 -13  11   1    3.34    0.25
 -13  11   1    3.00    0.22
  13  11  -1    4.58    0.53
  13  11  -1    2.96    0.42
 -11 -11   1    2.69    0.36
  11 -11  -1    2.71    0.44
 -11 -11   1    2.71    0.29
  11 -11  -1    2.02    0.36
 -11 -11   1    3.19    0.42
 -11 -11   1    3.63    0.55
  11 -11  -1    2.20    0.26
 -11  11   1    2.35    0.20
  11  11  -1    2.16    0.31
  11  11  -1    3.09    0.40
  11  11  -1    2.46    0.32
 -11  11   1    2.52    0.36
 -11  11   1    2.43    0.30
 -11  11   1    2.51    0.25
  -9 -11   1    1.27    0.29
  -9 -11   1    0.86    0.17
   9 -11  -1    0.92    0.30
   9 -11  -1    0.79    0.24
  -9 -11   1    1.10    0.23
   9 -11  -1    0.56    0.26
   9 -11  -1    0.59    0.18
  -9 -11   1    0.47    0.28
  -9  11   1    0.63    0.20
   9  11  -1    0.79    0.19
  -9  11   1    0.82    0.17
   9  11  -1    0.96    0.23
   9  11  -1    0.72    0.28
  -9  11   1    1.11    0.13
  -9  11   1    0.63    0.25
  -7 -11   1   16.20    0.79
   7 -11  -1   15.42    0.73
  -7 -11   1   15.51    0.70
   7 -11  -1   15.55    0.73
  -7 -11   1   15.37    0.76
  -7 -11   1   14.44    0.77
   7 -11  -1   15.80    0.79
   7 -11  -1   16.09    0.80
  -7 -11   1   16.17    0.73
   7 -11  -1   15.46    0.75
  -7  11   1   16.38    0.79
  -7  11   1   15.18    0.74
   7  11  -1   15.90    0.79
   7  11  -1   14.90    0.76
  -7  11   1   15.44    0.75
  -7  11   1   15.28    0.71
   7  11  -1   15.18    0.70
   5 -11  -1   88.91    3.85
  -5 -11   1   87.07    3.82
  -5 -11   1   86.49    3.83
   5 -11  -1   90.15    3.90
   5 -11  -1   88.77    3.87
   5 -11  -1   86.93    3.84
  -5 -11   1   84.88    3.85
  -5 -11   1   90.28    3.86
  -5 -11   1   89.98    3.86
  -5  11   1   88.18    3.85
  -5  11   1   89.10    3.87
   5  11  -1   85.05    3.82
  -5  11   1   87.40    3.83
   5  11  -1   87.02    3.86
   5  11  -1   87.66    3.85
   5  11  -1   84.83    3.83
   3 -11  -1    0.28    0.16
   3 -11  -1    0.41    0.14
  -3 -11   1    0.59    0.11
   3 -11  -1    0.50    0.10
  -3 -11   1    0.57    0.15
   3 -11  -1    0.58    0.20
  -3 -11   1    0.31    0.08
  -3 -11   1    0.48    0.18
  -3 -11   1    0.36    0.18
   3 -11  -1    0.66    0.16
   3  11  -1    0.62    0.11
  -3  11   1    0.73    0.11
   3  11  -1    0.71    0.14
  -3  11   1    0.37    0.17
  -3  11   1    0.61    0.14
   3  11  -1    0.30    0.17
   1 -11  -1   11.98    0.58
   1 -11  -1   12.23    0.59
  -1 -11   1   11.25    0.60
   1 -11  -1   12.58    0.62
   1 -11  -1   13.00    0.60
   1 -11  -1   11.69    0.56
  -1 -11   1   12.42    0.60
  -1 -11   1   11.83    0.54
  -1 -11   1   11.59    0.61
  -1  11   1   11.65    0.57
   1  11  -1   11.85    0.61
   1  11  -1   12.15    0.56
  -1  11   1   12.18    0.60
   1  11  -1   11.39    0.58
  -1  11   1   12.77    0.58
  -1  11   1   12.50    0.57
  -1  11   1   10.70    0.61
   1  11  -1   12.42    0.60
   1  11  -1   11.32    0.56
  -1 -11  -1   18.01    0.80
   1 -11   1   18.24    0.85
  -1 -11  -1   17.32    0.81
   1 -11   1   16.72    0.83
  -1 -11  -1   18.15    0.84
   1 -11   1   18.16    0.81
  -1 -11  -1   17.28    0.85
   1 -11   1   17.47    0.78
  -1 -11  -1   17.43    0.83
  -1  11  -1   18.54    0.82
  -1  11  -1   17.77    0.81
   1  11   1   17.39    0.85
   1  11   1   17.46    0.82
   1  11   1   16.76    0.82
  -1  11  -1   18.16    0.84
   1  11   1   17.70    0.82
  -1  11  -1   17.99    0.85
   3 -11   1   26.92    1.20
   3 -11   1   28.10    1.23
  -3 -11  -1   27.12    1.27
   3 -11   1   29.19    1.26
  -3 -11  -1   26.78    1.25
   3 -11   1   27.66    1.19
  -3 -11  -1   26.74    1.21
  -3 -11  -1   26.96    1.21
   3 -11   1   26.92    1.26
  -3 -11  -1   28.24    1.24
  -3  11  -1   27.20    1.23
  -3  11  -1   25.76    1.25
   3  11   1   27.32    1.22
   3  11   1   25.95    1.23
  -3  11  -1   27.05    1.22
   3  11   1   26.09    1.26
   3  11   1   27.57    1.23
  -5 -11  -1   59.89    2.58
   5 -11   1   57.05    2.58
   5 -11   1   56.04    2.58
  -5 -11  -1   56.13    2.57
   5 -11   1   56.95    2.52
  -5 -11  -1   57.66    2.54
  -5 -11  -1   59.07    2.57
   5 -11   1   59.45    2.52
   5 -11   1   58.28    2.55
  -5 -11  -1   58.37    2.53
  -5  11  -1   58.84    2.55
  -5  11  -1   57.71    2.56
   5  11   1   60.83    2.57
   5  11   1   54.86    2.58
   5  11   1   55.41    2.54
   5  11   1   58.29    2.55
  -5  11  -1   56.82    2.57
  -5  11  -1   57.53    2.55
   7 -11   1   13.12    0.68
   7 -11   1   12.45    0.64
  -7 -11  -1   13.11    0.65
  -7 -11  -1   12.26    0.60
   7 -11   1   12.48    0.69
  -7 -11  -1   12.61    0.68
   7 -11   1   12.43    0.58
   7 -11   1   12.54    0.57
  -7 -11  -1   12.62    0.66
  -7 -11  -1   11.77    0.57
   7  11   1   11.23    0.64
  -7  11  -1   12.70    0.66
  -7  11  -1   11.97    0.60
  -7  11  -1   12.08    0.61
   7  11   1   12.63    0.58
   7  11   1   12.57    0.68
   7  11   1   12.45    0.63
  -7  11  -1   11.09    0.64
  -9 -11  -1   23.79    1.09
  -9 -11  -1   22.65    1.05
   9 -11   1   23.85    1.12
  -9 -11  -1   22.98    1.16
   9 -11   1   23.80    1.18
   9 -11   1   24.32    1.06
   9 -11   1   23.93    1.15
  -9 -11  -1   23.10    1.14
  -9 -11  -1   23.25    1.13
  -9  11  -1   25.32    1.16
  -9  11  -1   24.24    1.08
   9  11   1   21.77    1.16
  -9  11  -1   22.75    1.11
  -9  11  -1   24.67    1.11
   9  11   1   22.23    1.12
   9  11   1   24.31    1.12
 -11 -11  -1    1.75    0.43
  11 -11   1    2.15    0.22
 -11 -11  -1    1.69    0.15
  11 -11   1    2.86    0.50
  11 -11   1    1.76    0.38
 -11 -11  -1    1.63    0.14
 -11 -11  -1    2.28    0.26
 -11 -11  -1    2.21    0.34
 -11  11  -1    2.04    0.36
  11  11   1    2.40    0.42
 -11  11  -1    2.13    0.27
 -11  11  -1    1.97    0.23
  11  11   1    1.77    0.30
 -11  11  -1    2.03    0.29
 -13 -11  -1    0.56    0.39
  13 -11   1    0.56    0.58
 -13 -11  -1    0.43    0.26
  13 -11   1    0.73    0.44
  13 -11   1    0.58    0.26
 -13  11  -1    0.63    0.39
 -13  11  -1    0.50    0.23
 -13  11  -1    0.66    0.30
  13  11   1    0.36    0.53
  13  11   1    0.32    0.32
 -13  11  -1    0.13    0.28
  14 -12  -1    1.81    0.51
 -14 -12   1    2.68    0.47
  14 -12  -1    2.30    0.70
 -14 -12   1    2.63    0.36
  14 -12  -1    2.05    0.38
  14  12  -1    2.50    0.39
 -14  12   1    2.92    0.39
 -14  12   1    2.23    0.19
 -14  12   1    2.89    0.21
  14  12  -1    2.84    0.62
 -14  12   1    2.09    0.50
 -12 -12   1    4.20    0.40
 -12 -12   1    4.03    0.48
  12 -12  -1    4.65    0.57
  12 -12  -1    3.87    0.55
  12 -12  -1    3.28    0.41
 -12  12   1    3.90    0.27
  12  12  -1    4.58    0.43
  12  12  -1    4.59    0.57
 -12  12   1    4.24    0.42
 -12  12   1    4.33    0.31
 -12  12   1    4.43    0.53
  10 -12  -1    4.98    0.55
  10 -12  -1    4.61    0.36
 -10 -12   1    4.18    0.40
 -10 -12   1    4.44    0.34
  10 -12  -1    4.47    0.47
 -10 -12   1    4.98    0.53
  10  12  -1    4.09    0.40
  10  12  -1    4.23    0.50
 -10  12   1    4.43    0.27
  10  12  -1    3.91    0.37
 -10  12   1    4.07    0.33
 -10  12   1    3.51    0.35
   8 -12  -1    0.20    0.25
  -8 -12   1    0.35    0.09
  -8 -12   1    0.67    0.24
  -8 -12   1    0.42    0.15
   8 -12  -1    0.55    0.25
   8 -12  -1    0.31    0.15
  -8 -12   1    0.26    0.30
  -8 -12   1    0.29    0.28
   8 -12  -1    0.56    0.31
   8 -12  -1    0.73    0.19
  -8  12   1    0.02    0.18
   8  12  -1    0.33    0.18
  -8  12   1    0.25    0.12
   8  12  -1    0.27    0.09
   8  12  -1    0.13    0.27
   8  12  -1    0.02    0.20
  -8  12   1    0.34    0.25
  -8  12   1    0.16    0.19
  -6 -12   1    1.33    0.26
   6 -12  -1    2.34    0.32
   6 -12  -1    1.21    0.25
  -6 -12   1    1.16    0.21
   6 -12  -1    1.24    0.18
  -6 -12   1    1.64    0.28
  -6 -12   1    1.36    0.18
  -6 -12   1    1.43    0.15
   6 -12  -1    1.56    0.23
   6 -12  -1    1.33    0.16
  -6  12   1    1.37    0.20
   6  12  -1    1.19    0.19
  -6  12   1    1.60    0.26
   6  12  -1    1.18    0.16
   6  12  -1    1.17    0.18
  -6  12   1    1.27    0.14
   6  12  -1    1.11    0.25
   4 -12  -1   32.38    1.49
   4 -12  -1   33.66    1.56
  -4 -12   1   33.02    1.47
   4 -12  -1   32.46    1.48
   4 -12  -1   34.68    1.56
  -4 -12   1   32.71    1.52
  -4 -12   1   34.84    1.47
  -4 -12   1   32.82    1.51
   4 -12  -1   32.94    1.49
  -4 -12   1   32.94    1.52
  -4  12   1   33.44    1.52
  -4  12   1   32.86    1.50
   4  12  -1   33.26    1.50
  -4  12   1   33.33    1.48
   4  12  -1   32.51    1.48
   4  12  -1   33.52    1.53
   2 -12  -1    7.19    0.42
   2 -12  -1    7.95    0.47
   2 -12  -1    6.91    0.35
  -2 -12   1    6.92    0.40
   2 -12  -1    6.34    0.38
  -2 -12   1    6.63    0.36
  -2 -12   1    6.83    0.33
  -2 -12   1    6.67    0.43
   2 -12  -1    7.16    0.40
  -2 -12   1    6.86    0.44
   2  12  -1    6.85    0.36
  -2  12   1    6.69    0.39
  -2  12   1    6.13    0.41
  -2  12   1    6.41    0.36
   2  12  -1    7.15    0.36
   2  12  -1    6.93    0.41
  -2  12   1    6.90    0.46
   2  12  -1    6.51    0.44
   2  12  -1    6.71    0.38
   0 -12   1   27.93    1.22
   0 -12   1   26.57    1.25
   0 -12   1   27.43    1.25
   0 -12  -1   26.82    1.24
   0 -12  -1   27.32    1.25
   0 -12  -1   25.88    1.20
   0 -12   1   27.50    1.25
   0 -12  -1   27.33    1.22
   0 -12   1   26.26    1.19
   0 -12  -1   28.74    1.30
   0  12  -1   26.11    1.23
   0  12  -1   26.50    1.25
   0  12  -1   26.69    1.22
   0  12  -1   27.13    1.26
   0  12   1   26.57    1.22
   0  12   1   27.07    1.22
   0  12   1   27.45    1.27
   0  12   1   27.86    1.38
   0  12   1   26.71    1.22
  -2 -12  -1  106.43    4.64
  -2 -12  -1  106.89    4.66
   2 -12   1  105.37    4.62
   2 -12   1  107.35    4.63
  -2 -12  -1  106.71    4.68
   2 -12   1  107.52    4.68
   2 -12   1  101.38    4.67
  -2 -12  -1  108.56    4.67
  -2 -12  -1  107.36    4.64
   2 -12   1  108.91    4.65
   2  12   1  108.31    4.68
  -2  12  -1  107.35    4.67
   2  12   1  104.58    4.66
  -2  12  -1  102.24    4.65
   2  12   1  106.94    4.65
   2  12   1  106.35    4.65
  -2  12  -1  105.55    4.65
   4 -12   1    2.18    0.25
   4 -12   1    2.44    0.29
   4 -12   1    2.09    0.26
  -4 -12  -1    2.66    0.20
   4 -12   1    2.13    0.15
  -4 -12  -1    2.16    0.24
  -4 -12  -1    2.63    0.28
  -4 -12  -1    2.08    0.28
  -4 -12  -1    1.63    0.19
   4 -12   1    2.05    0.17
  -4  12  -1    1.61    0.21
  -4  12  -1    2.12    0.22
   4  12   1    1.95    0.21
  -4  12  -1    2.15    0.29
   4  12   1    2.07    0.23
   4  12   1    2.25    0.25
   4  12   1    1.85    0.28
   6 -12   1    4.84    0.40
   6 -12   1    4.80    0.25
  -6 -12  -1    4.35    0.29
   6 -12   1    5.33    0.43
  -6 -12  -1    3.58    0.42
  -6 -12  -1    4.83    0.37
   6 -12   1    4.36    0.36
   6 -12   1    4.61    0.25
  -6 -12  -1    4.23    0.27
  -6 -12  -1    4.31    0.42
   6  12   1    4.49    0.37
  -6  12  -1    4.35    0.38
   6  12   1    4.50    0.42
   6  12   1    4.37    0.33
   6  12   1    4.42    0.31
  -6  12  -1    4.83    0.30
  -6  12  -1    5.20    0.39
  -6  12  -1    3.84    0.31
  -8 -12  -1    1.78    0.29
  -8 -12  -1    1.90    0.19
   8 -12   1    2.16    0.37
   8 -12   1    1.68    0.21
  -8 -12  -1    1.59    0.35
  -8 -12  -1    2.34    0.33
   8 -12   1    2.14    0.31
   8 -12   1    1.91    0.20
  -8 -12  -1    1.73    0.21
  -8  12  -1    1.89    0.24
  -8  12  -1    1.61    0.23
   8  12   1    2.40    0.64
  -8  12  -1    1.78    0.27
   8  12   1    2.37    0.26
  -8  12  -1    2.11    0.32
 -10 -12  -1    0.01    0.20
 -10 -12  -1    0.14    0.28
 -10 -12  -1    0.27    0.41
 -10 -12  -1    0.24    0.11
  10 -12   1    0.08    0.34
 -10 -12  -1    0.22    0.11
  10 -12   1    0.40    0.42
  10 -12   1    0.27    0.27
 -10  12  -1    0.23    0.23
 -10  12  -1    0.37    0.32
 -10  12  -1    0.18    0.27
 -10  12  -1    0.45    0.19
  10  12   1   -0.02    0.38
  10  12   1    0.01    0.24
 -12 -12  -1    8.17    0.64
 -12 -12  -1    7.44    0.50
  12 -12   1    8.32    0.69
  12 -12   1    7.57    0.83
  12 -12   1    6.88    0.46
  12  12   1    6.95    0.75
  12  12   1    6.43    0.55
 -12  12  -1    7.37    0.51
 -12  12  -1    7.16    0.68
 -12  12  -1    7.11    0.55
 -12  12  -1    7.02    0.46
 -13 -13   1    5.26    0.61
  13 -13  -1    5.44    0.52
  13 -13  -1    3.80    0.70
 -13 -13   1    5.40    0.47
  13 -13  -1    5.71    0.68
  13  13  -1    4.19    0.63
 -13  13   1    5.08    0.67
 -13  13   1    5.40    0.34
 -13  13   1    6.08    0.52
  13  13  -1    5.03    0.54
 -13  13   1    4.57    0.30
  11 -13  -1    4.72    0.54
 -11 -13   1    4.72    0.48
  11 -13  -1    4.34    0.39
 -11 -13   1    4.44    0.39
  11 -13  -1    5.13    0.58
  11 -13  -1    4.96    0.41
 -11  13   1    4.22    0.37
 -11  13   1    4.83    0.43
 -11  13   1    4.41    0.53
  11  13  -1    3.83    0.43
 -11  13   1    4.87    0.29
  11  13  -1    4.06    0.58
  -9 -13   1    0.48    0.37
   9 -13  -1    0.40    0.31
  -9 -13   1    0.27    0.18
   9 -13  -1    0.37    0.38
   9 -13  -1    0.37    0.19
   9 -13  -1    0.22    0.22
  -9 -13   1    0.41    0.09
  -9 -13   1    0.13    0.26
  -9  13   1    0.26    0.23
  -9  13   1    0.19    0.29
  -9  13   1    0.46    0.21
   9  13  -1    0.48    0.22
   9  13  -1    0.07    0.32
  -7 -13   1    3.28    0.22
   7 -13  -1    2.94    0.35
  -7 -13   1    2.97    0.35
  -7 -13   1    3.35    0.26
  -7 -13   1    3.60    0.45
   7 -13  -1    3.58    0.47
  -7 -13   1    3.06    0.40
   7 -13  -1    3.32    0.26
   7 -13  -1    3.43    0.40
   7 -13  -1    3.35    0.30
   7  13  -1    3.74    0.32
   7  13  -1    3.05    0.41
  -7  13   1    3.48    0.34
  -7  13   1    3.39    0.25
  -7  13   1    4.15    0.31
   7  13  -1    3.45    0.33
   7  13  -1    3.24    0.23
  -7  13   1    3.74    0.40
  -5 -13   1   17.47    0.87
  -5 -13   1   19.42    0.95
  -5 -13   1   17.05    0.81
   5 -13  -1   18.27    0.89
   5 -13  -1   18.39    0.83
   5 -13  -1   17.25    0.86
  -5 -13   1   17.82    0.90
   5 -13  -1   17.89    0.82
  -5 -13   1   17.52    0.81
   5 -13  -1   17.66    0.91
   5  13  -1   16.61    0.89
  -5  13   1   18.26    0.89
   5  13  -1   17.46    0.82
  -5  13   1   17.77    0.82
   5  13  -1   17.23    0.85
   5  13  -1   18.07    0.84
  -5  13   1   16.72    0.85
  -3 -13   1    2.39    0.28
  -3 -13   1    3.00    0.31
  -3 -13   1    2.46    0.18
  -3 -13   1    2.21    0.21
   3 -13  -1    2.14    0.29
   3 -13  -1    2.64    0.36
   3 -13  -1    2.24    0.19
  -3 -13   1    2.23    0.29
   3 -13  -1    2.02    0.27
   3  13  -1    2.05    0.25
   3  13  -1    2.63    0.23
  -3  13   1    2.12    0.24
   3  13  -1    2.58    0.36
  -3  13   1    2.19    0.21
   3  13  -1    1.92    0.21
  -3  13   1    3.02    0.32
  -1 -13   1   25.66    1.14
   1 -13  -1   25.61    1.21
  -1 -13   1   26.02    1.16
  -1 -13   1   26.13    1.20
   1 -13  -1   27.87    1.21
   1 -13  -1   24.63    1.14
   1 -13  -1   25.67    1.19
  -1 -13   1   23.71    1.21
  -1 -13   1   26.83    1.19
   1 -13  -1   26.35    1.17
  -1  13   1   25.26    1.17
   1  13  -1   24.70    1.19
  -1  13   1   24.73    1.20
   1  13  -1   25.27    1.17
   1  13  -1   25.93    1.16
  -1  13   1   24.24    1.37
   1  13  -1   25.05    1.15
   1  13  -1   27.30    1.22
  -1  13   1   25.41    1.17
   1 -13   1    8.40    0.47
   1 -13   1    7.26    0.51
   1 -13   1    8.22    0.45
  -1 -13  -1    8.21    0.43
  -1 -13  -1    8.29    0.41
  -1 -13  -1    8.13    0.51
  -1 -13  -1    7.97    0.48
  -1 -13  -1    7.57    0.48
   1 -13   1    7.90    0.38
  -1  13  -1    7.37    0.43
  -1  13  -1    8.23    0.52
   1  13   1    8.51    0.52
   1  13   1    8.29    0.46
   1  13   1    8.38    0.44
  -1  13  -1    8.57    0.49
   1  13   1    7.82    0.44
  -1  13  -1    8.28    0.43
   3 -13   1    2.02    0.24
  -3 -13  -1    2.20    0.27
  -3 -13  -1    1.88    0.22
  -3 -13  -1    2.30    0.31
  -3 -13  -1    1.94    0.19
   3 -13   1    2.03    0.27
   3 -13   1    1.93    0.30
  -3 -13  -1    1.89    0.25
   3 -13   1    1.71    0.13
   3 -13   1    1.88    0.18
   3  13   1    2.04    0.27
  -3  13  -1    1.84    0.22
   3  13   1    1.75    0.22
   3  13   1    1.10    0.28
   3  13   1    2.02    0.25
  -3  13  -1    2.00    0.22
  -3  13  -1    1.61    0.25
   5 -13   1    4.09    0.45
  -5 -13  -1    4.02    0.27
   5 -13   1    3.82    0.24
   5 -13   1    3.80    0.22
  -5 -13  -1    4.38    0.43
  -5 -13  -1    4.55    0.27
  -5 -13  -1    4.97    0.56
  -5 -13  -1    3.31    0.36
   5 -13   1    4.08    0.38
   5  13   1    3.73    0.34
  -5  13  -1    4.16    0.29
   5  13   1    4.71    0.45
  -5  13  -1    3.95    0.39
  -5  13  -1    3.49    0.30
   5  13   1    3.74    0.36
   5  13   1    4.00    0.28
  -5  13  -1    4.21    0.39
  -7 -13  -1    0.69    0.25
  -7 -13  -1    0.81    0.15
   7 -13   1    0.74    0.28
   7 -13   1    0.84    0.35
   7 -13   1    0.99    0.29
  -7 -13  -1    1.05    0.35
  -7 -13  -1    1.02    0.35
   7 -13   1    1.02    0.14
   7 -13   1    0.97    0.13
  -7 -13  -1    0.74    0.18
   7  13   1    1.02    0.30
   7  13   1    0.73    0.15
   7  13   1    0.77    0.35
   7  13   1    0.92    0.27
  -7  13  -1    0.94    0.18
  -7  13  -1    0.81    0.28
  -7  13  -1    1.20    0.34
  -7  13  -1    0.96    0.29
   9 -13   1    0.02    0.17
  -9 -13  -1    0.18    0.42
   9 -13   1    0.09    0.15
  -9 -13  -1    0.02    0.13
   9 -13   1    0.08    0.33
   9 -13   1    0.24    0.43
  -9 -13  -1   -0.16    0.29
   9  13   1    0.08    0.33
  -9  13  -1    0.02    0.23
   9  13   1    0.24    0.24
   9  13   1    0.22    0.39
  -9  13  -1    0.19    0.32
  -9  13  -1   -0.13    0.29
  -9  13  -1    0.09    0.18
  11 -13   1    2.13    0.46
  11 -13   1    2.19    0.26
 -11 -13  -1    1.86    0.16
 -11 -13  -1    2.05    0.30
  11 -13   1    1.85    0.58
 -11 -13  -1    1.70    0.16
  11 -13   1    1.82    0.23
  11  13   1    2.23    0.53
 -11  13  -1    2.08    0.32
 -11  13  -1    1.87    0.35
 -11  13  -1    2.18    0.25
  11  13   1    1.41    0.33
  12 -14  -1   -0.24    0.45
  12 -14  -1   -0.09    0.65
 -12 -14   1    0.04    0.28
  12 -14  -1   -0.13    0.30
  12 -14  -1    0.02    0.28
 -12 -14   1    0.11    0.39
 -12  14   1    0.00    0.16
 -12  14   1   -0.01    0.33
 -12  14   1    0.17    0.45
 -12  14   1   -0.03    0.24
  12  14  -1    0.25    0.32
  12  14  -1   -0.07    0.62
  10 -14  -1    1.96    0.28
  10 -14  -1    1.62    0.41
 -10 -14   1    2.38    0.38
  10 -14  -1    2.24    0.55
  10 -14  -1    1.70    0.26
 -10  14   1    2.68    0.33
 -10  14   1    2.04    0.24
 -10  14   1    1.68    0.40
  10  14  -1    1.49    0.40
  10  14  -1    1.64    0.31
  10  14  -1    1.54    0.46
 -10  14   1    1.94    0.29
   8 -14  -1    4.50    0.36
   8 -14  -1    4.56    0.31
   8 -14  -1    4.25    0.47
   8 -14  -1    4.60    0.56
  -8 -14   1    4.42    0.57
  -8 -14   1    3.72    0.25
  -8 -14   1    3.83    0.42
  -8 -14   1    4.20    0.32
   8  14  -1    3.93    0.39
  -8  14   1    3.56    0.47
  -8  14   1    3.86    0.46
   8  14  -1    3.49    0.26
  -8  14   1    4.02    0.37
  -8  14   1    3.60    0.29
   8  14  -1    3.12    0.43
   8  14  -1    4.04    0.44
   6 -14  -1    2.90    0.41
   6 -14  -1    1.97    0.31
  -6 -14   1    2.05    0.36
  -6 -14   1    2.04    0.36
  -6 -14   1    2.20    0.29
   6 -14  -1    2.38    0.24
  -6 -14   1    1.97    0.22
  -6 -14   1    1.63    0.22
   6 -14  -1    2.16    0.31
   6 -14  -1    1.64    0.19
   6  14  -1    2.19    0.35
  -6  14   1    1.74    0.30
   6  14  -1    1.57    0.21
   6  14  -1    1.33    0.24
  -6  14   1    2.16    0.29
  -6  14   1    1.82    0.23
   6  14  -1    2.46    0.33
   4 -14  -1    4.42    0.38
  -4 -14   1    4.63    0.45
   4 -14  -1    4.48    0.27
  -4 -14   1    3.66    0.26
  -4 -14   1    3.93    0.43
   4 -14  -1    4.64    0.36
  -4 -14   1    3.95    0.29
  -4 -14   1    4.02    0.36
   4 -14  -1    4.72    0.47
   4 -14  -1    4.63    0.39
  -4  14   1    4.14    0.29
   4  14  -1    3.85    0.28
  -4  14   1    4.14    0.34
   4  14  -1    3.36    0.33
   4  14  -1    4.92    0.46
   4  14  -1    3.99    0.32
  -4  14   1    4.44    0.41
  -2 -14   1    1.00    0.24
  -2 -14   1    1.11    0.12
   2 -14  -1    0.93    0.13
   2 -14  -1    1.12    0.31
   2 -14  -1    0.91    0.22
  -2 -14   1    0.92    0.29
  -2 -14   1    0.79    0.29
   2 -14  -1    0.94    0.28
  -2 -14   1    0.93    0.19
   2 -14  -1    1.13    0.24
  -2  14   1    0.82    0.25
   2  14  -1    1.13    0.30
  -2  14   1    0.89    0.16
   2  14  -1    1.03    0.18
  -2  14   1    0.87    0.32
   2  14  -1    0.52    0.16
   2  14  -1    0.81    0.19
  -2  14   1    0.93    0.21
   2  14  -1    0.67    0.23
   0 -14   1   14.78    0.77
   0 -14   1   13.92    0.63
   0 -14   1   14.69    0.75
   0 -14  -1   12.20    0.71
   0 -14  -1   13.31    0.72
   0 -14   1   13.06    0.71
   0 -14  -1   14.10    0.65
   0 -14  -1   14.48    0.77
   0 -14  -1   13.99    0.68
   0 -14   1   14.07    0.69
   0  14   1   14.17    0.69
   0  14  -1   13.68    0.72
   0  14   1   13.72    0.69
   0  14   1   15.24    0.79
   0  14  -1   14.35    0.77
   0  14  -1   13.67    0.68
   0  14  -1   12.99    0.67
   0  14   1   13.25    0.68
   0  14   1   13.25    0.72
   2 -14   1    6.49    0.34
  -2 -14  -1    6.12    0.38
   2 -14   1    5.73    0.31
   2 -14   1    6.00    0.51
  -2 -14  -1    6.42    0.50
   2 -14   1    6.01    0.42
  -2 -14  -1    6.73    0.45
   2 -14   1    6.55    0.46
  -2 -14  -1    6.58    0.48
  -2 -14  -1    6.28    0.34
   2  14   1    5.97    0.38
  -2  14  -1    6.15    0.38
   2  14   1    5.83    0.42
   2  14   1    6.69    0.52
  -2  14  -1    6.94    0.45
  -2  14  -1    5.84    0.38
   2  14   1    6.63    0.40
   4 -14   1   11.96    0.71
  -4 -14  -1   11.44    0.69
   4 -14   1   12.57    0.67
  -4 -14  -1   12.85    0.73
  -4 -14  -1   11.70    0.58
   4 -14   1   10.95    0.55
   4 -14   1   12.14    0.54
  -4 -14  -1   11.39    0.57
  -4 -14  -1   11.56    0.65
   4 -14   1   11.14    0.63
  -4  14  -1   12.54    0.60
   4  14   1   11.11    0.62
   4  14   1   11.65    0.60
  -4  14  -1   11.27    0.67
   4  14   1   12.11    0.71
  -4  14  -1   12.11    0.61
   4  14   1   11.41    0.64
  -6 -14  -1    1.96    0.40
   6 -14   1    1.76    0.33
   6 -14   1    2.36    0.18
   6 -14   1    2.26    0.20
  -6 -14  -1    1.86    0.25
  -6 -14  -1    2.69    0.25
   6 -14   1    2.21    0.37
  -6 -14  -1    2.42    0.32
   6 -14   1    2.09    0.40
  -6 -14  -1    2.34    0.40
  -6  14  -1    2.12    0.29
  -6  14  -1    2.21    0.32
   6  14   1    2.30    0.32
  -6  14  -1    2.17    0.28
   6  14   1    2.41    0.26
  -6  14  -1    3.46    0.37
   6  14   1    2.27    0.29
   6  14   1    3.16    0.42
  -8 -14  -1    1.64    0.23
  -8 -14  -1    1.80    0.19
  -8 -14  -1    1.50    0.45
  -8 -14  -1    1.31    0.33
   8 -14   1    1.51    0.56
   8 -14   1    1.61    0.18
   8 -14   1    2.06    0.38
   8 -14   1    1.78    0.21
  -8  14  -1    1.83    0.36
   8  14   1    1.30    0.37
  -8  14  -1    1.64    0.27
  -8  14  -1    1.56    0.35
   8  14   1    1.22    0.43
   8  14   1    1.45    0.28
  -8  14  -1    1.19    0.22
 -10 -14  -1    0.01    0.15
 -10 -14  -1    0.47    0.38
  10 -14   1    0.17    0.21
 -10 -14  -1    0.02    0.23
  10 -14   1    0.34    0.41
  10 -14   1    0.32    0.57
 -10  14  -1   -0.10    0.28
 -10  14  -1    0.50    0.35
  10  14   1    0.14    0.30
  10  14   1    0.44    0.50
 -10  14  -1    0.30    0.42
 -10  14  -1    0.35    0.22
  11 -15  -1    9.09    0.59
 -11 -15   1    9.58    0.60
  11 -15  -1   10.19    0.82
  11 -15  -1   11.67    1.23
  11 -15  -1    9.06    0.62
 -11 -15   1    8.87    0.73
 -11  15   1    8.99    0.60
 -11  15   1    9.89    0.66
 -11  15   1    9.28    0.77
 -11  15   1   10.58    0.53
  11  15  -1    9.03    0.67
   9 -15  -1   12.61    0.66
   9 -15  -1   13.31    0.96
   9 -15  -1   12.30    0.69
  -9 -15   1   13.56    0.77
  -9 -15   1   12.74    0.60
   9 -15  -1   13.91    0.85
  -9 -15   1   13.18    0.69
  -9  15   1   13.19    0.65
   9  15  -1   13.74    0.90
   9  15  -1   13.46    0.74
   9  15  -1   12.18    0.79
  -9  15   1   11.44    0.73
  -9  15   1   13.71    0.74
   7 -15  -1   15.51    0.76
   7 -15  -1   14.71    0.94
   7 -15  -1   16.16    0.85
  -7 -15   1   14.53    0.71
  -7 -15   1   14.89    0.73
   7 -15  -1   14.20    0.72
  -7 -15   1   14.37    0.81
  -7  15   1   14.99    0.81
  -7  15   1   15.32    0.79
   7  15  -1   14.89    0.79
  -7  15   1   14.76    0.85
  -7  15   1   15.84    0.73
   7  15  -1   16.04    0.90
   7  15  -1   14.99    0.72
   7  15  -1   13.97    0.80
   5 -15  -1   -0.01    0.37
  -5 -15   1    0.40    0.27
   5 -15  -1    0.20    0.28
  -5 -15   1    0.38    0.15
  -5 -15   1    0.06    0.35
   5 -15  -1    0.14    0.21
  -5 -15   1    0.41    0.19
   5 -15  -1    0.13    0.14
   5 -15  -1    0.20    0.38
  -5  15   1    0.05    0.24
   5  15  -1    0.17    0.24
   5  15  -1    0.28    0.21
   5  15  -1    0.10    0.17
   5  15  -1    0.08    0.35
  -5  15   1    0.26    0.29
  -5  15   1    0.20    0.17
   3 -15  -1    2.83    0.39
  -3 -15   1    2.13    0.21
   3 -15  -1    3.03    0.38
  -3 -15   1    2.05    0.28
  -3 -15   1    2.81    0.35
  -3 -15   1    2.02    0.37
   3 -15  -1    2.54    0.31
   3 -15  -1    2.10    0.21
   3  15  -1    2.59    0.26
   3  15  -1    2.65    0.38
  -3  15   1    2.11    0.31
   3  15  -1    2.28    0.31
  -3  15   1    2.35    0.29
   3  15  -1    1.85    0.22
  -3  15   1    2.19    0.27
   1 -15  -1    1.33    0.28
  -1 -15   1    1.37    0.52
   1 -15  -1    1.60    0.19
   1 -15  -1    2.36    0.28
  -1 -15   1    1.14    0.35
   1 -15  -1    1.73    0.37
  -1 -15   1    1.17    0.24
   1 -15  -1    1.49    0.30
  -1 -15   1    1.41    0.28
  -1 -15   1    1.53    0.16
   1  15  -1    1.63    0.28
   1  15  -1    2.30    0.39
  -1  15   1    2.27    0.42
   1  15  -1    1.66    0.22
  -1  15   1    1.43    0.29
  -1  15   1    1.39    0.23
   1  15  -1    1.75    0.23
  -1  15   1    1.46    0.21
   1 -15   1    1.94    0.27
  -1 -15  -1    2.23    0.35
  -1 -15  -1    2.14    0.38
  -1 -15  -1    2.23    0.25
   1 -15   1    2.29    0.37
  -1 -15  -1    1.66    0.29
  -1 -15  -1    1.90    0.21
   1 -15   1    2.09    0.17
   1 -15   1    1.85    0.29
   1  15   1    1.95    0.27
   1  15   1    2.22    0.25
  -1  15  -1    2.91    0.33
  -1  15  -1    2.06    0.28
   1  15   1    2.06    0.25
   1  15   1    2.22    0.40
  -1  15  -1    2.06    0.40
  -1  15  -1    2.14    0.25
   3 -15   1    3.53    0.44
   3 -15   1    3.56    0.20
  -3 -15  -1    3.62    0.39
  -3 -15  -1    3.49    0.40
  -3 -15  -1    3.24    0.31
   3 -15   1    3.19    0.37
   3 -15   1    3.35    0.41
  -3 -15  -1    3.98    0.46
  -3 -15  -1    3.56    0.27
   3 -15   1    2.98    0.24
  -3  15  -1    3.07    0.31
   3  15   1    3.28    0.34
   3  15   1    3.05    0.33
   3  15   1    3.25    0.31
  -3  15  -1    3.83    0.32
  -3  15  -1    3.39    0.41
   3  15   1    3.42    0.44
   5 -15   1    8.34    0.42
  -5 -15  -1    8.76    0.48
  -5 -15  -1    8.13    0.59
   5 -15   1    8.68    0.61
  -5 -15  -1    9.63    0.85
  -5 -15  -1    8.89    0.47
   5 -15   1    9.04    0.44
   5 -15   1    8.95    0.79
   5  15   1    9.27    0.71
  -5  15  -1    9.18    0.52
   5  15   1    8.07    0.53
   5  15   1    8.81    0.49
   5  15   1    8.69    0.59
  -5  15  -1    8.82    0.50
  -5  15  -1    9.11    0.61
  -7 -15  -1    6.07    0.54
   7 -15   1    5.95    0.33
   7 -15   1    5.90    0.34
   7 -15   1    6.09    0.72
  -7 -15  -1    6.07    0.69
   7 -15   1    5.66    0.57
  -7 -15  -1    6.24    0.38
  -7 -15  -1    5.87    0.40
   7  15   1    5.92    0.39
   7  15   1    6.21    0.48
   7  15   1    5.89    0.58
   7  15   1    6.74    0.70
  -7  15  -1    5.74    0.58
  -7  15  -1    6.03    0.46
  -7  15  -1    6.03    0.41
  -7  15  -1    6.51    0.56
  -9 -15  -1    4.39    0.41
   9 -15   1    3.90    0.66
  -9 -15  -1    4.86    0.57
   9 -15   1    3.91    0.51
   9 -15   1    4.30    0.31
  -9 -15  -1    4.03    0.31
  -9  15  -1    3.38    0.44
   9  15   1    4.45    0.47
  -9  15  -1    3.77    0.38
  -9  15  -1    4.76    0.61
  -9  15  -1    4.84    0.61
   9  15   1    3.73    0.61
  -8 -16   1    0.11    0.35
   8 -16  -1   -0.01    0.28
  -8 -16   1   -0.01    0.19
   8 -16  -1    0.07    0.39
   8 -16  -1   -0.07    0.63
   8 -16  -1    0.06    0.19
  -8 -16   1   -0.27    0.22
  -8  16   1   -0.02    0.20
   8  16  -1    0.05    0.36
  -8  16   1   -0.19    0.36
   8  16  -1    0.25    0.29
   8  16  -1    0.04    0.30
  -8  16   1    0.30    0.29
   8  16  -1   -0.21    0.53
  -8  16   1    0.00    0.41
  -6 -16   1   -0.08    0.18
   6 -16  -1    0.07    0.35
   6 -16  -1    0.09    0.48
  -6 -16   1    0.01    0.20
   6 -16  -1    0.00    0.16
   6 -16  -1    0.25    0.25
  -6 -16   1    0.09    0.31
  -6  16   1    0.06    0.26
  -6  16   1    0.06    0.20
   6  16  -1    0.00    0.19
   6  16  -1    0.20    0.25
  -6  16   1    0.14    0.36
   6  16  -1    0.12    0.32
   6  16  -1    0.36    0.44
  -4 -16   1    1.62    0.44
   4 -16  -1    1.75    0.19
   4 -16  -1    1.70    0.36
   4 -16  -1    1.75    0.27
  -4 -16   1    1.90    0.25
   4 -16  -1    1.54    0.47
  -4 -16   1    1.94    0.33
  -4 -16   1    1.96    0.24
   4  16  -1    1.48    0.28
   4  16  -1    2.36    0.29
  -4  16   1    2.12    0.37
  -4  16   1    1.82    0.24
  -4  16   1    2.16    0.29
   4  16  -1    1.66    0.27
   4  16  -1    2.08    0.44
   2 -16  -1    0.74    0.32
  -2 -16   1    0.84    0.38
   2 -16  -1    1.00    0.16
   2 -16  -1    1.26    0.31
  -2 -16   1    0.55    0.28
  -2 -16   1    0.77    0.14
   2 -16  -1    0.95    0.33
  -2 -16   1    0.84    0.44
  -2 -16   1    0.57    0.26
   2 -16  -1    0.62    0.41
   2  16  -1    1.03    0.23
  -2  16   1    0.97    0.22
   2  16  -1    0.95    0.41
  -2  16   1    1.36    0.32
  -2  16   1    1.12    0.26
   2  16  -1    1.06    0.22
   0 -16  -1   20.81    0.94
   0 -16   1   19.99    1.08
   0 -16  -1   20.26    1.02
   0 -16  -1   19.01    1.09
   0 -16   1   19.83    1.02
   0 -16  -1   19.43    1.12
   0 -16  -1   19.79    1.05
   0  16   1   19.09    1.12
   0  16  -1   20.31    0.98
   0  16   1   20.59    0.98
   0  16  -1   23.36    1.20
   0  16   1   21.59    0.99
   0  16  -1   20.11    1.03
   0  16  -1   20.30    0.98
   2 -16   1    4.58    0.60
  -2 -16  -1    4.75    0.39
  -2 -16  -1    4.86    0.52
   2 -16   1    5.27    0.48
  -2 -16  -1    4.09    0.55
   2 -16   1    4.44    0.25
  -2 -16  -1    4.30    0.52
   2 -16   1    4.04    0.31
  -2 -16  -1    4.73    0.31
   2 -16   1    4.37    0.45
   2  16   1    4.92    0.64
   2  16   1    4.31    0.47
   2  16   1    4.80    0.43
  -2  16  -1    3.94    0.36
   2  16   1    4.07    0.37
  -2  16  -1    4.45    0.38
  -2  16  -1    4.82    0.48
  -4 -16  -1    1.28    0.38
   4 -16   1    0.55    0.11
  -4 -16  -1    0.46    0.24
   4 -16   1    0.63    0.35
  -4 -16  -1   -0.02    0.45
  -4 -16  -1    0.63    0.18
   4 -16   1    0.49    0.15
   4 -16   1    0.64    0.45
   4  16   1    0.40    0.47
  -4  16  -1    0.37    0.32
   4  16   1    0.83    0.23
   4  16   1    0.40    0.25
  -4  16  -1    0.44    0.23
   4  16   1    0.19    0.35
  -4  16  -1    0.45    0.26
  -6 -16  -1    5.75    0.77
   6 -16   1    4.98    0.30
   6 -16   1    4.94    0.70
   6 -16   1    4.81    0.27
  -6 -16  -1    4.75    0.38
  -6 -16  -1    5.14    0.54
   6 -16   1    5.73    0.57
  -6 -16  -1    4.77    0.39
  -6  16  -1    4.56    0.40
   6  16   1    5.22    0.47
   6  16   1    4.88    0.40
   6  16   1    5.07    0.63
  -6  16  -1    6.27    0.56
  -6  16  -1    4.81    0.44
  -6  16  -1    4.65    0.64
   6  16   1    4.75    0.58
  -8 -16  -1    0.52    0.41
   8 -16   1    0.67    0.47
   8 -16   1    0.47    0.15
  -8 -16  -1    0.61    0.25
   8 -16   1    0.55    0.17
  -8 -16  -1    0.59    0.22
  -8  16  -1    0.47    0.25
   8  16   1    0.54    0.33
  -8  16  -1    0.81    0.47
  -8  16  -1    0.10    0.42
   8  16   1    0.39    0.58
  -8  16  -1    0.37    0.31
   7 -17  -1   10.32    0.94
   7 -17  -1    9.91    0.78
   7 -17  -1   10.47    0.56
  -7 -17   1    9.86    0.73
  -7 -17   1   10.05    0.57
   7 -17  -1   10.02    0.63
  -7 -17   1    9.78    0.59
  -7  17   1   10.88    0.79
  -7  17   1   10.74    0.68
   7  17  -1    9.69    0.91
  -7  17   1   10.84    0.59
  -7  17   1    9.58    0.78
   7  17  -1   11.13    0.68
   7  17  -1   10.57    0.58
   7  17  -1   11.90    0.77
   5 -17  -1   14.97    1.02
   5 -17  -1   12.17    0.82
  -5 -17   1   13.34    0.65
  -5 -17   1   13.48    0.69
  -5 -17   1   12.73    0.78
   5 -17  -1   12.51    0.64
   5 -17  -1   12.58    0.71
  -5  17   1   13.64    0.73
  -5  17   1   13.15    0.69
  -5  17   1   12.07    0.80
   5  17  -1   14.35    0.99
   5  17  -1   12.29    0.68
   5  17  -1   13.35    0.74
   5  17  -1   12.27    0.76
   3 -17  -1    0.54    0.17
   3 -17  -1    0.13    0.34
  -3 -17   1    0.07    0.33
  -3 -17   1    0.11    0.27
  -3 -17   1    0.24    0.16
   3 -17  -1    0.09    0.28
   3  17  -1    0.39    0.29
  -3  17   1    0.13    0.23
   3  17  -1    0.71    0.48
   3  17  -1    0.24    0.25
   3  17  -1    0.08    0.23
  -3  17   1    0.28    0.35
  -3  17   1    0.30    0.27
   1 -17  -1   11.74    0.79
   1 -17  -1   12.28    0.60
   1 -17  -1   13.26    0.75
  -1 -17   1   12.63    0.73
  -1 -17   1   11.37    0.69
   1 -17  -1   13.05    0.94
   1 -17  -1   11.59    0.72
  -1 -17   1   12.09    0.58
   1  17  -1   10.56    0.72
  -1  17   1   12.49    0.76
   1  17  -1   12.83    0.67
  -1  17   1   11.96    0.93
  -1  17   1   11.56    0.66
  -1  17   1   12.99    0.71
   1  17  -1   11.58    0.66
   1  17  -1   11.69    0.86
   1 -17   1    2.07    0.38
  -1 -17  -1    1.67    0.33
   1 -17   1    1.66    0.62
  -1 -17  -1    2.13    0.37
  -1 -17  -1    1.43    0.50
   1 -17   1    1.70    0.36
  -1 -17  -1    1.69    0.20
   1  17   1    1.94    0.53
   1  17   1    1.01    0.27
   1  17   1    1.85    0.30
  -1  17  -1    1.41    0.31
  -1  17  -1    1.62    0.36
  -3 -17  -1   -0.16    0.27
   3 -17   1    0.01    0.17
   3 -17   1    0.03    0.38
  -3 -17  -1    0.05    0.35
  -3 -17  -1   -0.23    0.50
  -3 -17  -1    0.17    0.19
   3 -17   1    0.08    0.11
  -3  17  -1    0.08    0.25
   3  17   1    0.12    0.56
  -3  17  -1    0.03    0.34
   3  17   1    0.09    0.28
   3  17   1   -0.10    0.23
   3  17   1    0.11    0.38
  -3  17  -1   -0.14    0.26
  -5 -17  -1   -0.16    0.27
  -5 -17  -1   -0.25    0.37
   5 -17   1   -0.11    0.38
  -5 -17  -1   -0.20    0.21
   5 -17   1   -0.05    0.15
   5 -17   1   -0.02    0.11
  -5  17  -1    0.25    0.25
   5  17   1    0.62    0.57
   5  17   1    0.22    0.42
   5  17   1   -0.09    0.27
  -5  17  -1    0.13    0.48
  -5  17  -1    0.04    0.30
   5  17   1   -0.17    0.23
  -5  17  -1   -0.27    0.37
   7 -17   1    0.90    0.47
   7 -17   1    1.71    0.22
   7 -17   1    1.80    0.19
  -7 -17  -1    1.33    0.29
  -7 -17  -1    1.69    0.28
  -7 -17  -1    1.78    0.56
  -7  17  -1    2.45    0.57
   7  17   1    1.66    0.38
  -7  17  -1    1.85    0.37
  -7  17  -1    1.42    0.46
  -7  17  -1    1.62    0.30
   7  17   1    1.93    0.70
   7  17   1    1.73    0.28
  -4 -18   1    0.22    0.43
  -4 -18   1    0.09    0.19
   4 -18  -1    0.05    0.19
   4 -18  -1   -0.09    0.31
   4 -18  -1    0.36    0.65
  -4 -18   1    0.04    0.31
   4 -18  -1   -0.04    0.44
  -4  18   1    0.60    0.33
   4  18  -1   -0.11    0.30
   4  18  -1    0.03    0.27
   4  18  -1    0.01    0.60
  -4  18   1    0.15    0.41
  -4  18   1    0.09    0.27
   4  18  -1   -0.20    0.38
   2 -18  -1    1.62    0.59
  -2 -18   1    2.14    0.26
  -2 -18   1    1.91    0.37
   2 -18  -1    2.13    0.27
   2 -18  -1    1.81    0.43
  -2 -18   1    2.46    0.42
   2  18  -1    1.92    0.63
  -2  18   1    2.69    0.35
  -2  18   1    1.39    0.38
   2  18  -1    2.26    0.32
  -2  18   1    1.86    0.42
   2  18  -1    2.27    0.34
   0 -18  -1    0.34    0.71
   0 -18  -1    0.37    0.19
   0 -18  -1    0.34    0.39
   0 -18   1    0.42    0.15
   0 -18   1    0.57    0.42
   0  18   1    0.41    0.27
   0  18  -1    0.79    0.31
   0  18  -1    0.65    0.63
   0  18  -1   -0.12    0.37
   0  18   1    0.45    0.63
   0  18  -1    0.09    0.27
   0  18   1    0.25    0.30
   2 -18   1    4.45    0.27
  -2 -18  -1    3.97    0.56
   2 -18   1    4.66    0.59
  -2 -18  -1    3.99    0.34
  -2 -18  -1    3.64    0.50
   2 -18   1    4.08    0.35
  -2  18  -1    4.19    0.44
   2  18   1    3.63    0.50
   2  18   1    3.30    0.48
   2  18   1    4.88    0.46
  -2  18  -1    4.20    0.46
   2  18   1    3.79    0.68
  -2  18  -1    4.37    0.51
  -4 -18  -1    0.01    0.22
   4 -18   1    0.06    0.17
   4 -18   1   -0.16    0.47
  -4 -18  -1   -0.07    0.43
  -4 -18  -1   -0.27    0.33
   4 -18   1    0.00    0.12
   4  18   1   -0.16    0.65
   4  18   1    0.13    0.32
   4  18   1   -0.03    0.47
  -4  18  -1   -0.02    0.41
  -4  18  -1   -0.12    0.28
   4  18   1    0.23    0.28
  -4  18  -1   -0.31    0.32
  18   0  -2   -0.18    0.29
 -18   0   2    0.16    0.21
  18   0  -2    0.15    0.25
  18   0  -2   -0.16    0.46
 -18   0   2   -0.27    0.32
 -18   0   2   -0.21    0.40
 -18   0   2    0.18    0.34
 -16   0   2    1.14    0.23
  16   0  -2    1.14    0.35
 -16   0   2    0.82    0.30
  16   0  -2    1.06    0.22
 -16   0   2    1.05    0.17
 -16   0   2    0.78    0.28
 -14   0   2    9.63    0.57
 -14   0   2   10.48    0.52
  14   0  -2   11.06    0.50
 -14   0   2   10.66    0.57
  14   0  -2   10.22    0.53
  14   0  -2    8.96    0.58
 -12   0   2   47.42    2.13
  12   0  -2   48.37    2.12
  12   0  -2   47.29    2.13
 -12   0   2   49.24    2.11
  12   0  -2   47.10    2.11
  12   0  -2   46.18    2.10
 -12   0   2   49.32    2.10
  10   0  -2   47.82    2.08
  10   0  -2   47.45    2.06
  10   0  -2   46.46    2.07
 -10   0   2   48.48    2.07
 -10   0   2   46.13    2.06
 -10   0   2   46.55    2.09
   8   0  -2   14.06    0.62
   8   0  -2   13.51    0.64
   8   0  -2   13.82    0.64
  -8   0   2   13.52    0.63
   8   0  -2   14.10    0.63
  -8   0   2   14.31    0.63
  -8   0   2   14.41    0.65
  -6   0   2   74.87    3.30
  -6   0   2   77.74    3.32
   6   0  -2   75.16    3.30
   6   0  -2   76.53    3.30
  -6   0   2   75.77    3.30
  -6   0   2   74.38    3.31
   6   0  -2   76.42    3.31
   6   0  -2   76.52    3.31
  -4   0   2   36.15    1.63
   4   0  -2   38.51    1.63
   4   0  -2   37.69    1.63
  -4   0   2   37.25    1.64
  -4   0   2   37.68    1.64
   4   0  -2   38.12    1.64
   4   0  -2   36.97    1.64
  -4   0   2   37.19    1.63
   2   0  -2    3.03    0.15
  -2   0   2    3.42    0.15
   2   0  -2    2.97    0.15
   2   0  -2    2.95    0.15
   2   0  -2    2.91    0.14
   0   0   2  467.66   19.65
   0   0   2  438.53   19.64
  -2   0  -2  268.35   11.54
  -2   0  -2  243.85   11.54
   2   0   2  314.39   11.55
   2   0   2  235.21   11.54
   4   0   2   86.91    3.82
  -4   0  -2   88.41    3.83
   4   0   2   89.47    3.83
  -4   0  -2   85.30    3.82
   4   0   2   85.28    3.83
  -4   0  -2   87.88    3.82
   4   0   2   89.36    3.82
  -4   0  -2   89.69    3.83
   6   0   2   60.69    2.63
   6   0   2   57.04    2.64
  -6   0  -2   61.97    2.65
  -6   0  -2   59.43    2.63
   6   0   2   62.47    2.64
  -6   0  -2   59.00    2.64
  -6   0  -2   61.36    2.63
   6   0   2   59.69    2.65
  -8   0  -2   58.44    2.62
   8   0   2   61.13    2.62
  -8   0  -2   60.76    2.61
  -8   0  -2   59.71    2.60
  -8   0  -2   58.53    2.60
   8   0   2   58.24    2.62
   8   0   2   58.52    2.60
 -10   0  -2    1.23    0.15
 -10   0  -2    1.10    0.20
 -10   0  -2    1.14    0.17
  10   0   2    1.10    0.17
  10   0   2    1.49    0.17
  10   0   2    1.11    0.21
 -10   0  -2    1.04    0.13
  12   0   2    1.04    0.19
 -12   0  -2    1.07    0.15
  12   0   2    0.65    0.27
 -12   0  -2    1.19    0.19
  12   0   2    1.09    0.20
 -12   0  -2    1.01    0.21
  12   0   2    1.21    0.23
  14   0   2    0.36    0.24
  14   0   2    0.33    0.36
 -14   0  -2    0.46    0.25
 -14   0  -2    0.43    0.17
  14   0   2    0.23    0.27
 -14   0  -2    0.05    0.24
 -14   0  -2    0.51    0.31
 -16   0  -2    7.24    0.64
 -16   0  -2    9.09    0.68
  16   0   2    7.00    0.61
 -16   0  -2    6.75    0.56
  16   0   2    8.47    0.80
 -16   0  -2    7.68    0.46
 -17  -1   2    0.28    0.27
 -17  -1   2    0.16    0.28
  17  -1  -2    0.24    0.23
  17  -1  -2    0.27    0.39
 -17  -1   2    1.00    0.32
 -17  -1   2   -0.03    0.34
  17  -1  -2    0.27    0.24
 -17   1   2    0.39    0.35
 -17   1   2    0.27    0.24
  17   1  -2    0.39    0.38
 -17   1   2    0.23    0.20
  17   1  -2    0.22    0.19
  17   1  -2    0.03    0.25
 -17   1   2    0.15    0.29
  15  -1  -2    0.40    0.17
  15  -1  -2    0.21    0.29
  15  -1  -2    0.09    0.25
 -15  -1   2    0.08    0.27
 -15  -1   2    0.22    0.27
 -15  -1   2    0.31    0.13
  15  -1  -2    0.21    0.17
 -15  -1   2    0.35    0.20
 -15   1   2    0.42    0.17
  15   1  -2    0.04    0.27
 -15   1   2    0.19    0.15
  15   1  -2    0.07    0.25
  15   1  -2    0.05    0.19
  15   1  -2    0.37    0.14
 -15   1   2    0.03    0.23
 -15   1   2    0.14    0.25
 -13  -1   2    6.38    0.32
  13  -1  -2    6.62    0.42
  13  -1  -2    6.48    0.40
  13  -1  -2    6.26    0.35
 -13  -1   2    5.92    0.38
  13  -1  -2    6.23    0.33
 -13  -1   2    6.46    0.36
 -13   1   2    6.31    0.34
  13   1  -2    6.36    0.39
 -13   1   2    6.39    0.41
 -13   1   2    6.38    0.33
  13   1  -2    6.02    0.32
  13   1  -2    6.02    0.41
 -13   1   2    6.17    0.39
  13   1  -2    6.07    0.36
  11  -1  -2    0.48    0.09
 -11  -1   2    0.72    0.15
  11  -1  -2    0.44    0.10
  11  -1  -2    0.48    0.15
  11  -1  -2    0.57    0.16
 -11  -1   2    0.75    0.12
  11   1  -2    0.47    0.10
  11   1  -2    0.82    0.14
  11   1  -2    0.63    0.08
 -11   1   2    0.77    0.15
  11   1  -2    0.77    0.16
 -11   1   2    0.86    0.11
 -11   1   2    0.53    0.10
 -11   1   2    0.39    0.15
   9  -1  -2   13.99    0.65
  -9  -1   2   14.25    0.65
  -9  -1   2   14.23    0.67
   9  -1  -2   14.31    0.65
   9  -1  -2   15.23    0.68
   9  -1  -2   16.54    0.73
  -9  -1   2   14.10    0.64
  -9   1   2   14.09    0.67
   9   1  -2   13.70    0.65
   9   1  -2   14.14    0.64
   9   1  -2   14.81    0.67
   9   1  -2   14.80    0.67
  -9   1   2   13.57    0.65
  -9   1   2   14.24    0.64
  -7  -1   2   76.89    3.30
   7  -1  -2   76.54    3.31
  -7  -1   2   74.61    3.30
  -7  -1   2   76.93    3.29
   7  -1  -2   74.76    3.29
   7  -1  -2   77.04    3.30
   7  -1  -2   76.16    3.31
  -7  -1   2   75.56    3.31
   7   1  -2   77.07    3.31
   7   1  -2   75.30    3.30
   7   1  -2   74.98    3.30
  -7   1   2   75.95    3.29
  -7   1   2   76.03    3.30
   7   1  -2   74.27    3.29
  -7   1   2   73.36    3.31
   5  -1  -2   34.06    1.47
  -5  -1   2   33.78    1.46
   5  -1  -2   33.33    1.45
  -5  -1   2   32.65    1.47
   5  -1  -2   33.40    1.47
  -5  -1   2   33.71    1.46
  -5  -1   2   32.46    1.46
   5  -1  -2   35.21    1.46
   5   1  -2   32.16    1.45
  -5   1   2   34.31    1.45
  -5   1   2   33.96    1.47
   5   1  -2   33.03    1.47
  -5   1   2   34.41    1.46
  -5   1   2   32.42    1.46
   5   1  -2   32.64    1.46
   5   1  -2   32.94    1.46
   3  -1  -2   76.65    3.32
  -3  -1   2   71.51    3.32
  -3  -1   2   74.56    3.32
   3  -1  -2   75.12    3.32
  -3  -1   2   77.75    3.31
  -3  -1   2   76.14    3.32
   3  -1  -2   75.11    3.32
   3   1  -2   76.59    3.31
   3   1  -2   75.62    3.32
   3   1  -2   76.77    3.32
  -3   1   2   81.02    3.33
   3   1  -2   78.01    3.32
  -3   1   2   74.79    3.32
   1  -1  -2   34.18    1.47
   1  -1  -2   33.94    1.48
   1  -1  -2   34.55    1.47
   1  -1  -2   32.79    1.48
   1   1  -2   34.23    1.47
   1   1  -2   33.98    1.47
   1   1  -2   33.51    1.47
  -1   1   2   33.86    1.47
   1   1  -2   33.61    1.48
  -1   1   2   32.64    1.47
  -1   1   2   33.74    1.48
  -1  -1  -2  483.53   22.13
  -1  -1  -2  475.91   22.13
   1   1   2  506.83   22.14
  -1   1  -2  479.98   22.13
  -1   1  -2  522.30   22.13
   1   1   2  494.24   22.13
  -1   1  -2  588.74   22.13
   1   1   2  532.38   22.13
  -3  -1  -2   31.85    1.43
  -3  -1  -2   33.12    1.44
   3  -1   2   32.71    1.43
   3  -1   2   34.05    1.44
  -3  -1  -2   32.28    1.44
  -3  -1  -2   32.57    1.43
   3  -1   2   31.83    1.44
   3  -1   2   33.08    1.43
  -3   1  -2   32.54    1.43
  -3   1  -2   33.08    1.43
   3   1   2   31.53    1.44
   3   1   2   34.11    1.43
   3   1   2   32.92    1.44
  -3   1  -2   32.08    1.44
  -3   1  -2   32.34    1.44
  -5  -1  -2   35.50    1.55
   5  -1   2   33.72    1.56
  -5  -1  -2   36.06    1.57
  -5  -1  -2   33.75    1.55
   5  -1   2   36.12    1.56
   5  -1   2   35.25    1.56
  -5  -1  -2   36.43    1.56
   5  -1   2   36.38    1.55
  -5   1  -2   34.69    1.56
  -5   1  -2   34.30    1.55
   5   1   2   35.61    1.57
   5   1   2   35.78    1.56
  -5   1  -2   35.11    1.57
   5   1   2   36.09    1.55
  -5   1  -2   35.15    1.55
  -7  -1  -2    7.34    0.35
   7  -1   2    7.38    0.38
   7  -1   2    6.91    0.35
   7  -1   2    7.05    0.35
  -7  -1  -2    7.21    0.34
  -7  -1  -2    7.43    0.37
  -7  -1  -2    7.29    0.38
   7  -1   2    7.13    0.37
   7   1   2    7.23    0.35
  -7   1  -2    6.79    0.35
  -7   1  -2    7.02    0.34
  -7   1  -2    7.32    0.38
   7   1   2    7.27    0.38
  -7   1  -2    7.42    0.37
   7   1   2    6.85    0.37
  -9  -1  -2   29.63    1.31
   9  -1   2   29.92    1.32
   9  -1   2   28.85    1.30
  -9  -1  -2   29.20    1.32
   9  -1   2   28.11    1.30
  -9  -1  -2   28.23    1.30
   9  -1   2   29.78    1.32
  -9  -1  -2   29.35    1.30
  -9   1  -2   28.13    1.32
  -9   1  -2   28.59    1.30
   9   1   2   28.05    1.30
   9   1   2   29.37    1.32
   9   1   2   29.26    1.32
  -9   1  -2   29.69    1.29
  11  -1   2   15.87    0.77
 -11  -1  -2   15.96    0.72
 -11  -1  -2   16.16    0.76
 -11  -1  -2   15.46    0.74
  11  -1   2   15.31    0.79
  11  -1   2   16.16    0.75
 -11  -1  -2   15.06    0.78
  11  -1   2   15.38    0.74
 -11   1  -2   15.37    0.78
  11   1   2   15.49    0.77
 -11   1  -2   15.81    0.73
  11   1   2   16.27    0.75
 -11   1  -2   15.53    0.75
 -11   1  -2   15.05    0.74
  13  -1   2    0.08    0.30
 -13  -1  -2   -0.07    0.27
  13  -1   2   -0.08    0.21
 -13  -1  -2   -0.16    0.13
  13  -1   2    0.06    0.22
 -13  -1  -2   -0.13    0.18
 -13  -1  -2    0.02    0.23
  13  -1   2   -0.08    0.21
  13   1   2   -0.12    0.29
  13   1   2   -0.14    0.22
 -13   1  -2   -0.11    0.18
 -13   1  -2    0.04    0.28
 -13   1  -2   -0.10    0.21
 -13   1  -2    0.16    0.15
  13   1   2   -0.09    0.22
  15  -1   2   -0.02    0.43
 -15  -1  -2   -0.06    0.37
 -15  -1  -2   -0.10    0.32
  15  -1   2   -0.03    0.30
 -15  -1  -2   -0.28    0.17
  15  -1   2    0.00    0.31
 -15  -1  -2    0.16    0.26
  15   1   2   -0.27    0.30
  15   1   2    0.57    0.45
 -15   1  -2   -0.07    0.25
 -15   1  -2   -0.11    0.18
 -15   1  -2    0.02    0.31
 -15   1  -2   -0.26    0.34
  18  -2  -2   -0.08    0.52
  18  -2  -2   -0.01    0.31
  18  -2  -2   -0.06    0.26
 -18  -2   2   -0.01    0.37
 -18  -2   2   -0.19    0.41
 -18  -2   2   -0.41    0.36
 -18  -2   2    0.19    0.16
 -18   2   2    0.11    0.24
 -18   2   2   -0.09    0.27
 -18   2   2    0.45    0.44
  18   2  -2   -0.10    0.30
 -18   2   2   -0.38    0.35
  18   2  -2    0.05    0.49
  16  -2  -2    0.17    0.35
 -16  -2   2    0.31    0.26
 -16  -2   2    0.05    0.26
  16  -2  -2    0.23    0.20
 -16  -2   2    0.23    0.29
  16  -2  -2    0.70    0.22
 -16  -2   2    0.22    0.13
 -16   2   2    0.40    0.19
 -16   2   2    0.26    0.26
 -16   2   2    0.44    0.18
  16   2  -2    0.17    0.23
 -16   2   2    0.07    0.29
  16   2  -2    0.08    0.32
 -14  -2   2    1.93    0.22
 -14  -2   2    1.71    0.24
  14  -2  -2    1.68    0.19
 -14  -2   2    1.49    0.15
  14  -2  -2    1.62    0.22
  14  -2  -2    2.11    0.38
  14  -2  -2    1.12    0.26
  14   2  -2    1.78    0.16
  14   2  -2    1.11    0.25
  14   2  -2    1.26    0.20
 -14   2   2    1.77    0.21
 -14   2   2    2.17    0.25
  14   2  -2    1.18    0.24
 -14   2   2    1.30    0.25
 -14   2   2    1.61    0.20
  12  -2  -2    8.31    0.49
 -12  -2   2    8.89    0.42
  12  -2  -2    9.14    0.47
 -12  -2   2    8.52    0.45
  12  -2  -2    9.07    0.44
 -12  -2   2    8.95    0.48
  12  -2  -2    8.73    0.44
  12   2  -2    8.71    0.45
  12   2  -2    8.60    0.41
 -12   2   2    9.30    0.44
 -12   2   2    9.03    0.49
 -12   2   2    9.48    0.43
 -12   2   2    9.03    0.48
  12   2  -2    9.30    0.48
  12   2  -2    9.43    0.49
 -10  -2   2   10.26    0.45
 -10  -2   2   10.32    0.48
 -10  -2   2   10.23    0.49
  10  -2  -2    9.95    0.50
  10  -2  -2    9.38    0.46
  10  -2  -2    9.97    0.49
  10  -2  -2    9.67    0.46
 -10   2   2    9.62    0.45
  10   2  -2    9.44    0.44
  10   2  -2    9.71    0.51
 -10   2   2    9.52    0.47
 -10   2   2    9.57    0.49
 -10   2   2   10.15    0.49
  10   2  -2   10.31    0.49
  10   2  -2    9.89    0.47
  -8  -2   2    7.55    0.35
   8  -2  -2    7.31    0.35
   8  -2  -2    7.58    0.34
   8  -2  -2    7.65    0.37
   8  -2  -2    6.60    0.39
  -8  -2   2    6.90    0.33
  -8  -2   2    7.29    0.36
  -8  -2   2    7.33    0.36
   8   2  -2    7.36    0.35
   8   2  -2    7.57    0.36
   8   2  -2    7.43    0.36
   8   2  -2    7.13    0.33
  -8   2   2    7.13    0.35
  -8   2   2    7.24    0.36
  -8   2   2    7.52    0.33
   6  -2  -2  170.20    7.61
  -6  -2   2  173.56    7.61
   6  -2  -2  172.25    7.61
  -6  -2   2  170.12    7.61
   6  -2  -2  171.33    7.61
   6  -2  -2  176.83    7.59
  -6  -2   2  190.91    7.60
   6   2  -2  174.37    7.61
   6   2  -2  173.66    7.59
   6   2  -2  177.07    7.61
   4  -2  -2    9.76    0.41
  -4  -2   2    8.94    0.41
  -4  -2   2    8.44    0.41
   4  -2  -2    9.40    0.41
  -4  -2   2    8.86    0.41
   4  -2  -2    9.54    0.42
   4   2  -2    9.13    0.41
   4   2  -2    8.87    0.41
  -4   2   2    9.51    0.42
   4   2  -2    8.92    0.41
   4   2  -2    8.48    0.40
  -4   2   2    9.27    0.41
  -4   2   2    8.72    0.41
   2  -2  -2   25.01    1.07
   2  -2  -2   23.97    1.07
  -2  -2   2   23.82    1.07
  -2  -2   2   24.87    1.07
  -2  -2   2   23.93    1.07
   2  -2  -2   25.28    1.08
   2  -2  -2   24.42    1.07
  -2   2   2   24.71    1.07
   2   2  -2   25.11    1.07
   2   2  -2   24.71    1.07
  -2   2   2   24.95    1.07
  -2   2   2   23.90    1.08
   2   2  -2   23.72    1.07
   2   2  -2   23.63    1.07
   2   2  -2   24.98    1.08
   0  -2   2  236.91   10.78
   0  -2  -2  265.73   10.78
   0  -2  -2  255.83   10.78
   0   2  -2  213.84   10.78
   0   2   2  266.64   10.79
   0   2  -2  210.92   10.78
   0   2   2  273.40   10.78
   0   2  -2  265.15   10.78
  -2  -2  -2    5.35    0.24
   2  -2   2    5.10    0.25
   2  -2   2    5.07    0.24
  -2  -2  -2    5.09    0.24
  -2  -2  -2    4.91    0.25
   2  -2   2    5.07    0.23
   2  -2   2    5.12    0.24
  -2  -2  -2    5.10    0.25
   2   2   2    4.59    0.24
  -2   2  -2    5.07    0.25
   2   2   2    5.22    0.24
   2   2   2    5.04    0.25
  -2   2  -2    5.34    0.24
  -2   2  -2    5.13    0.25
  -2   2  -2    5.00    0.23
  -4  -2  -2    4.03    0.19
   4  -2   2    3.90    0.21
  -4  -2  -2    3.67    0.20
  -4  -2  -2    3.78    0.19
   4  -2   2    3.57    0.21
  -4  -2  -2    3.48    0.20
   4  -2   2    3.57    0.18
   4  -2   2    3.62    0.19
   4   2   2    3.34    0.21
   4   2   2    3.58    0.19
   4   2   2    4.00    0.21
  -4   2  -2    4.08    0.18
  -4   2  -2    3.56    0.19
  -4   2  -2    3.72    0.21
  -4   2  -2    3.59    0.21
  -6  -2  -2    0.99    0.14
  -6  -2  -2    1.08    0.10
   6  -2   2    1.19    0.13
   6  -2   2    0.92    0.13
  -6  -2  -2    0.84    0.12
   6  -2   2    1.49    0.15
   6  -2   2    1.30    0.11
   6   2   2    1.27    0.12
   6   2   2    1.00    0.14
  -6   2  -2    1.20    0.14
  -6   2  -2    0.84    0.10
  -6   2  -2    0.93    0.10
   6   2   2    1.18    0.14
  -6   2  -2    1.33    0.14
  -8  -2  -2    9.77    0.44
  -8  -2  -2    9.53    0.47
   8  -2   2    9.91    0.48
  -8  -2  -2    9.18    0.45
  -8  -2  -2    8.79    0.48
   8  -2   2    9.22    0.45
   8  -2   2    9.39    0.47
   8  -2   2    9.30    0.45
  -8   2  -2    9.39    0.45
  -8   2  -2    9.54    0.47
   8   2   2    9.04    0.45
  -8   2  -2    9.44    0.45
  -8   2  -2    9.59    0.48
   8   2   2    8.47    0.48
   8   2   2    9.63    0.48
  10  -2   2    2.79    0.30
  10  -2   2    2.47    0.26
 -10  -2  -2    2.59    0.26
  10  -2   2    2.62    0.22
 -10  -2  -2    2.54    0.28
  10  -2   2    2.50    0.23
 -10  -2  -2    2.91    0.21
 -10  -2  -2    3.19    0.20
 -10   2  -2    2.72    0.25
  10   2   2    2.83    0.30
  10   2   2    2.54    0.24
  10   2   2    2.53    0.26
 -10   2  -2    2.57    0.29
 -10   2  -2    2.58    0.21
 -10   2  -2    2.84    0.20
  12  -2   2    0.95    0.22
 -12  -2  -2    0.57    0.17
 -12  -2  -2    0.63    0.22
  12  -2   2    0.64    0.18
  12  -2   2    0.70    0.27
 -12  -2  -2    0.58    0.13
  12  -2   2    0.80    0.20
 -12  -2  -2    0.81    0.25
 -12   2  -2    0.42    0.17
  12   2   2    0.85    0.22
 -12   2  -2    0.74    0.21
 -12   2  -2    0.75    0.15
 -12   2  -2    0.49    0.24
  12   2   2    0.45    0.26
  12   2   2    0.53    0.22
  14  -2   2    6.57    0.60
  14  -2   2    5.22    0.45
  14  -2   2    5.94    0.47
 -14  -2  -2    5.44    0.33
 -14  -2  -2    5.21    0.42
  14  -2   2    5.37    0.46
 -14  -2  -2    5.42    0.52
 -14   2  -2    5.85    0.36
  14   2   2    5.49    0.47
 -14   2  -2    5.40    0.46
 -14   2  -2    5.81    0.42
  14   2   2    5.52    0.57
 -14   2  -2    5.65    0.51
  16  -2   2    1.95    0.42
 -16  -2  -2    1.92    0.23
  16  -2   2    2.04    0.58
 -16  -2  -2    2.97    0.47
  16  -2   2    1.25    0.35
 -16  -2  -2    1.94    0.34
  16   2   2    1.89    0.59
  16   2   2    1.23    0.37
 -16   2  -2    2.23    0.38
 -16   2  -2    2.17    0.36
 -16   2  -2    2.12    0.26
 -16   2  -2    1.90    0.46
  17  -3  -2    1.28    0.32
  17  -3  -2    1.13    0.42
 -17  -3   2    1.34    0.36
 -17  -3   2    0.53    0.30
 -17  -3   2    0.02    0.36
 -17  -3   2    0.73    0.11
  17  -3  -2    0.82    0.29
 -17   3   2    0.83    0.21
 -17   3   2    1.32    0.33
  17   3  -2    1.41    0.45
  17   3  -2    1.18    0.29
 -17   3   2    0.82    0.37
 -17   3   2    0.92    0.24
 -15  -3   2    2.64    0.36
 -15  -3   2    3.02    0.18
  15  -3  -2    3.40    0.43
  15  -3  -2    3.25    0.28
  15  -3  -2    3.13    0.40
 -15  -3   2    2.72    0.35
  15  -3  -2    2.81    0.31
 -15   3   2    3.04    0.24
  15   3  -2    2.52    0.32
 -15   3   2    2.72    0.38
 -15   3   2    3.81    0.28
 -15   3   2    3.37    0.36
  15   3  -2    2.99    0.40
  13  -3  -2    3.04    0.30
 -13  -3   2    2.29    0.27
 -13  -3   2    2.69    0.28
 -13  -3   2    2.53    0.15
  13  -3  -2    3.06    0.24
  13  -3  -2    2.75    0.22
  13  -3  -2    2.32    0.33
  13   3  -2    2.74    0.31
  13   3  -2    2.49    0.29
  13   3  -2    2.26    0.25
 -13   3   2    2.87    0.19
 -13   3   2    2.73    0.31
 -13   3   2    2.20    0.29
 -13   3   2    3.01    0.23
  11  -3  -2    0.12    0.14
  11  -3  -2    0.23    0.14
 -11  -3   2    0.11    0.13
 -11  -3   2    0.31    0.05
  11  -3  -2    0.01    0.17
  11  -3  -2    0.40    0.09
 -11  -3   2    0.32    0.15
 -11   3   2    0.34    0.15
 -11   3   2    0.36    0.08
  11   3  -2    0.24    0.15
 -11   3   2    0.24    0.11
 -11   3   2    0.02    0.14
  11   3  -2    0.42    0.12
  11   3  -2    0.12    0.14
   9  -3  -2   85.49    3.74
   9  -3  -2   87.76    3.77
   9  -3  -2   85.31    3.73
  -9  -3   2   87.41    3.72
  -9  -3   2   87.32    3.75
  -9  -3   2   90.51    3.76
   9  -3  -2   84.11    3.76
  -9  -3   2   86.31    3.75
   9   3  -2   83.79    3.75
  -9   3   2   84.27    3.74
   9   3  -2   85.34    3.75
   9   3  -2   82.02    3.75
  -9   3   2   85.35    3.72
  -9   3   2   84.20    3.76
  -9   3   2   86.72    3.76
   7  -3  -2   26.78    1.18
   7  -3  -2   27.44    1.20
  -7  -3   2   27.47    1.20
   7  -3  -2   27.51    1.20
  -7  -3   2   26.72    1.20
  -7  -3   2   25.88    1.20
   7  -3  -2   27.77    1.24
   7   3  -2   26.94    1.20
  -7   3   2   25.94    1.21
   7   3  -2   27.54    1.20
  -7   3   2   28.02    1.18
  -7   3   2   27.07    1.20
   7   3  -2   26.34    1.20
  -5  -3   2    4.81    0.24
  -5  -3   2    4.27    0.24
   5  -3  -2    5.56    0.25
   5  -3  -2    5.56    0.24
  -5  -3   2    4.87    0.24
   5  -3  -2    4.93    0.25
   5   3  -2    4.47    0.22
   5   3  -2    4.23    0.22
  -5   3   2    5.45    0.25
   5   3  -2    4.83    0.24
  -5   3   2    5.44    0.25
   5   3  -2    5.22    0.24
   3  -3  -2   41.90    1.90
   3  -3  -2   43.12    1.90
   3  -3  -2   41.24    1.89
  -3  -3   2   44.64    1.89
  -3  -3   2   43.80    1.89
   3  -3  -2   43.19    1.89
  -3  -3   2   45.16    1.90
  -3  -3   2   43.57    1.89
   3   3  -2   42.87    1.88
   3   3  -2   43.97    1.90
  -3   3   2   42.09    1.88
  -3   3   2   42.42    1.89
   3   3  -2   42.30    1.89
   3   3  -2   45.96    1.89
   1  -3  -2   11.26    0.49
   1  -3  -2   11.68    0.49
   1  -3  -2   10.53    0.49
  -1  -3   2   10.50    0.48
   1  -3  -2   10.69    0.49
  -1  -3   2   11.31    0.49
   1  -3  -2   10.68    0.49
  -1  -3   2   10.58    0.49
  -1  -3   2   10.86    0.48
   1   3  -2   10.68    0.49
   1   3  -2   10.79    0.49
  -1   3   2   11.13    0.49
  -1   3   2   10.71    0.49
  -1   3   2   10.74    0.49
  -1   3   2   11.01    0.49
   1   3  -2   11.04    0.49
   1   3  -2   10.91    0.48
   1   3  -2   11.19    0.49
   1  -3   2  199.71    8.80
  -1  -3  -2  198.13    8.80
  -1  -3  -2  215.92    8.80
  -1  -3  -2  207.21    8.80
   1   3   2  207.14    8.80
  -1   3  -2  195.95    8.78
  -1   3  -2  194.69    8.80
   3  -3   2   13.96    0.62
   3  -3   2   14.31    0.64
  -3  -3  -2   15.36    0.63
   3  -3   2   13.61    0.64
  -3  -3  -2   13.78    0.63
  -3  -3  -2   14.29    0.64
   3  -3   2   14.27    0.63
  -3  -3  -2   13.15    0.64
   3   3   2   13.92    0.64
  -3   3  -2   14.02    0.62
  -3   3  -2   13.29    0.64
  -3   3  -2   13.84    0.63
   3   3   2   14.24    0.64
   3   3   2   14.06    0.63
  -3   3  -2   14.04    0.64
  -5  -3  -2    2.54    0.16
  -5  -3  -2    2.97    0.15
  -5  -3  -2    2.32    0.15
   5  -3   2    2.40    0.16
  -5  -3  -2    2.90    0.18
   5  -3   2    2.34    0.18
   5  -3   2    2.56    0.18
   5  -3   2    2.36    0.14
  -5  -3  -2    2.44    0.17
   5   3   2    2.55    0.19
  -5   3  -2    2.86    0.18
   5   3   2    2.31    0.18
  -5   3  -2    2.66    0.16
  -5   3  -2    2.80    0.14
   5   3   2    2.69    0.17
  -5   3  -2    2.83    0.18
   7  -3   2    7.56    0.42
   7  -3   2    8.66    0.42
  -7  -3  -2    8.17    0.38
  -7  -3  -2    8.63    0.40
  -7  -3  -2    7.87    0.42
   7  -3   2    8.42    0.40
   7  -3   2    8.55    0.39
   7   3   2    8.05    0.40
  -7   3  -2    8.13    0.42
  -7   3  -2    7.91    0.39
   7   3   2    7.45    0.42
  -7   3  -2    8.08    0.41
   7   3   2    8.11    0.41
  -7   3  -2    8.13    0.39
  -9  -3  -2    6.52    0.38
   9  -3   2    7.67    0.41
   9  -3   2    6.91    0.35
  -9  -3  -2    6.92    0.36
   9  -3   2    6.82    0.36
  -9  -3  -2    6.54    0.33
  -9  -3  -2    7.37    0.40
   9  -3   2    6.62    0.38
  -9   3  -2    6.85    0.38
  -9   3  -2    6.72    0.40
   9   3   2    6.36    0.39
  -9   3  -2    7.17    0.35
  -9   3  -2    6.40    0.35
   9   3   2    6.87    0.40
   9   3   2    6.58    0.37
 -11  -3  -2    0.14    0.20
 -11  -3  -2    0.90    0.12
  11  -3   2    0.66    0.18
  11  -3   2    0.68    0.19
  11  -3   2    0.43    0.24
  11  -3   2    0.45    0.15
 -11  -3  -2    0.64    0.16
 -11  -3  -2    0.62    0.21
  11   3   2    0.55    0.19
 -11   3  -2    0.73    0.16
  11   3   2    0.79    0.21
 -11   3  -2    0.49    0.23
 -11   3  -2    0.20    0.13
 -11   3  -2    0.60    0.18
 -13  -3  -2   18.09    0.82
  13  -3   2   18.03    0.95
  13  -3   2   17.47    0.89
  13  -3   2   18.00    0.88
 -13  -3  -2   18.69    0.96
  13  -3   2   17.63    0.87
 -13  -3  -2   18.14    0.90
 -13  -3  -2   17.77    0.87
  13   3   2   17.97    0.90
 -13   3  -2   16.93    0.92
  13   3   2   17.36    0.90
  13   3   2   18.62    0.94
 -13   3  -2   18.06    0.87
 -13   3  -2   18.44    0.85
 -13   3  -2   17.70    0.88
  15  -3   2    0.05    0.34
  15  -3   2   -0.08    0.48
 -15  -3  -2    0.16    0.25
  15  -3   2   -0.08    0.30
 -15  -3  -2   -0.21    0.38
 -15  -3  -2   -0.02    0.35
 -15  -3  -2    0.02    0.16
  15  -3   2   -0.05    0.47
  15   3   2   -0.10    0.45
 -15   3  -2   -0.19    0.20
 -15   3  -2    0.05    0.27
 -15   3  -2   -0.03    0.38
  15   3   2    0.13    0.32
 -15   3  -2    0.14    0.30
 -18  -4   2   -0.16    0.35
  18  -4  -2    0.46    0.58
  18  -4  -2   -0.41    0.38
 -18  -4   2   -0.10    0.43
  18  -4  -2    0.12    0.27
 -18   4   2    0.15    0.22
 -18   4   2    0.28    0.27
  18   4  -2    0.36    0.52
  18   4  -2    0.42    0.38
 -18   4   2    0.42    0.36
 -18   4   2    0.11    0.44
 -16  -4   2    1.59    0.30
  16  -4  -2    1.94    0.22
  16  -4  -2    1.02    0.37
  16  -4  -2    1.42    0.28
 -16  -4   2    1.65    0.34
 -16   4   2    1.61    0.19
 -16   4   2    1.60    0.31
  16   4  -2    1.30    0.28
 -16   4   2    1.55    0.24
  16   4  -2    2.07    0.40
 -16   4   2    1.29    0.35
  14  -4  -2   20.99    0.98
 -14  -4   2   22.16    1.00
  14  -4  -2   19.39    1.06
  14  -4  -2   20.46    0.95
  14  -4  -2   20.62    1.04
 -14  -4   2   21.53    1.00
 -14   4   2   21.18    1.03
  14   4  -2   20.85    1.00
 -14   4   2   19.91    1.00
 -14   4   2   21.16    0.94
 -14   4   2   19.21    0.97
  14   4  -2   22.34    0.99
  14   4  -2   21.97    1.03
  12  -4  -2   39.31    1.77
 -12  -4   2   38.80    1.77
  12  -4  -2   38.92    1.74
  12  -4  -2   39.26    1.79
  12  -4  -2   40.76    1.76
 -12  -4   2   39.06    1.77
 -12   4   2   39.49    1.73
  12   4  -2   36.98    1.76
 -12   4   2   39.88    1.76
 -12   4   2   39.44    1.78
 -12   4   2   42.19    1.79
  12   4  -2   39.80    1.77
  10  -4  -2    7.10    0.38
  10  -4  -2    7.33    0.38
  10  -4  -2    6.54    0.39
  10  -4  -2    7.18    0.33
 -10  -4   2    6.99    0.37
 -10   4   2    6.94    0.39
 -10   4   2    7.27    0.38
 -10   4   2    6.85    0.36
  10   4  -2    6.71    0.36
 -10   4   2    6.77    0.32
  10   4  -2    6.59    0.36
  10   4  -2    6.94    0.39
   8  -4  -2   18.41    0.84
  -8  -4   2   17.11    0.84
  -8  -4   2   19.03    0.85
   8  -4  -2   18.01    0.85
  -8  -4   2   18.46    0.84
   8  -4  -2   19.79    0.86
  -8   4   2   19.93    0.85
   8   4  -2   18.92    0.85
   8   4  -2   18.31    0.86
  -8   4   2   18.06    0.85
   6  -4  -2   53.14    2.38
   6  -4  -2   52.31    2.37
  -6  -4   2   53.56    2.37
  -6  -4   2   55.20    2.37
   6  -4  -2   54.08    2.37
  -6  -4   2   57.95    2.38
  -6   4   2   51.90    2.38
   6   4  -2   55.18    2.37
   6   4  -2   54.67    2.37
   6   4  -2   54.84    2.37
  -6   4   2   53.57    2.37
  -6   4   2   53.13    2.38
   4  -4  -2    9.32    0.41
   4  -4  -2    9.97    0.42
  -4  -4   2    9.00    0.41
  -4  -4   2    9.00    0.42
  -4  -4   2    8.76    0.40
  -4  -4   2    8.37    0.41
  -4  -4   2    8.77    0.41
   4  -4  -2    9.14    0.42
   4   4  -2    8.43    0.41
  -4   4   2    7.96    0.42
  -4   4   2    9.24    0.39
   4   4  -2    8.93    0.41
   4   4  -2    9.62    0.41
  -4   4   2    9.00    0.42
   4   4  -2    8.46    0.39
  -2  -4   2  107.91    4.80
   2  -4  -2  109.40    4.81
  -2  -4   2  114.12    4.80
   2  -4  -2  108.34    4.81
  -2  -4   2  109.10    4.80
   2  -4  -2  109.82    4.81
  -2  -4   2  111.28    4.81
   2  -4  -2  111.22    4.80
   2   4  -2  105.42    4.80
   2   4  -2  112.74    4.80
   2   4  -2  111.13    4.79
  -2   4   2  106.38    4.81
   2   4  -2  112.75    4.81
  -2   4   2  113.98    4.81
   2   4  -2  113.52    4.80
   0  -4  -2    8.48    0.41
   0  -4  -2    8.99    0.42
   0  -4  -2    9.01    0.41
   0  -4   2    8.79    0.40
   0  -4   2    8.63    0.41
   0  -4  -2    8.88    0.41
   0  -4  -2    9.17    0.41
   0  -4   2    8.32    0.41
   0   4   2    9.00    0.41
   0   4  -2    8.49    0.41
   0   4   2    8.71    0.41
   0   4  -2    8.81    0.40
   0   4  -2    8.59    0.41
   0   4  -2    8.62    0.41
   0   4   2    9.14    0.41
   0   4   2    9.69    0.41
  -2  -4  -2    1.75    0.12
   2  -4   2    1.86    0.13
  -2  -4  -2    1.46    0.12
   2  -4   2    1.71    0.09
   2  -4   2    1.81    0.11
  -2  -4  -2    1.89    0.11
  -2  -4  -2    1.87    0.11
   2   4   2    1.59    0.11
  -2   4  -2    1.74    0.14
   2   4   2    1.98    0.13
   2   4   2    1.87    0.13
  -2   4  -2    1.52    0.12
   2   4   2    1.87    0.12
  -2   4  -2    1.76    0.09
  -2   4  -2    1.79    0.11
  -4  -4  -2   18.90    0.86
   4  -4   2   19.23    0.85
  -4  -4  -2   19.50    0.85
  -4  -4  -2   19.12    0.86
   4  -4   2   18.96    0.86
   4  -4   2   18.57    0.86
  -4  -4  -2   18.35    0.84
   4  -4   2   19.12    0.83
  -4   4  -2   18.11    0.84
   4   4   2   18.22    0.85
   4   4   2   18.95    0.86
  -4   4  -2   19.22    0.86
   4   4   2   19.74    0.85
  -4   4  -2   19.76    0.84
  -4   4  -2   18.02    0.86
  -6  -4  -2    0.47    0.11
   6  -4   2    0.63    0.13
  -6  -4  -2    0.45    0.08
  -6  -4  -2    0.36    0.11
   6  -4   2    0.56    0.10
   6  -4   2    0.45    0.11
   6  -4   2    0.49    0.07
  -6  -4  -2    0.41    0.07
   6   4   2    0.31    0.11
   6   4   2    0.41    0.12
  -6   4  -2    0.38    0.11
  -6   4  -2    0.53    0.12
  -6   4  -2    0.50    0.08
   6   4   2    0.56    0.11
  -6   4  -2    0.44    0.09
  -8  -4  -2    2.64    0.24
  -8  -4  -2    3.27    0.25
   8  -4   2    3.25    0.20
  -8  -4  -2    3.53    0.21
   8  -4   2    3.20    0.23
   8  -4   2    3.60    0.25
   8  -4   2    3.03    0.28
  -8  -4  -2    3.07    0.18
  -8  -4  -2    3.27    0.20
  -8   4  -2    3.65    0.21
   8   4   2    3.44    0.24
  -8   4  -2    3.18    0.25
   8   4   2    2.73    0.24
   8   4   2    3.01    0.27
  -8   4  -2    3.07    0.26
 -10  -4  -2    2.92    0.27
 -10  -4  -2    2.52    0.21
 -10  -4  -2    2.15    0.26
 -10  -4  -2    1.99    0.17
  10  -4   2    2.14    0.20
  10  -4   2    2.33    0.26
 -10  -4  -2    2.03    0.21
  10  -4   2    2.05    0.30
  10  -4   2    2.25    0.24
  10   4   2    2.19    0.27
  10   4   2    2.18    0.30
 -10   4  -2    2.37    0.22
  10   4   2    2.37    0.26
 -10   4  -2    2.16    0.27
 -10   4  -2    2.44    0.26
 -10   4  -2    2.67    0.20
 -12  -4  -2    1.87    0.18
  12  -4   2    1.70    0.21
 -12  -4  -2    1.89    0.22
 -12  -4  -2    2.11    0.30
  12  -4   2    1.79    0.27
 -12  -4  -2    1.58    0.27
  12  -4   2    1.98    0.33
 -12  -4  -2    1.86    0.25
  12  -4   2    2.19    0.26
  12   4   2    2.19    0.28
 -12   4  -2    2.54    0.26
 -12   4  -2    2.06    0.26
 -12   4  -2    1.76    0.22
  12   4   2    1.87    0.32
  12   4   2    1.77    0.27
 -12   4  -2    1.64    0.29
 -14  -4  -2    4.81    0.52
 -14  -4  -2    4.37    0.51
 -14  -4  -2    4.65    0.51
  14  -4   2    4.87    0.45
 -14  -4  -2    3.78    0.37
  14  -4   2    4.48    0.48
  14  -4   2    5.01    0.59
  14  -4   2    4.90    0.42
 -14  -4  -2    5.09    0.30
 -14   4  -2    5.17    0.44
 -14   4  -2    5.04    0.51
 -14   4  -2    4.58    0.35
  14   4   2    5.30    0.59
  14   4   2    4.96    0.47
 -14   4  -2    4.91    0.40
 -16  -4  -2    1.50    0.20
  16  -4   2    0.95    0.60
  16  -4   2    1.17    0.37
 -16  -4  -2    1.60    0.48
 -16  -4  -2    1.38    0.30
 -16  -4  -2    1.53    0.34
  16   4   2    1.35    0.60
 -16   4  -2    1.57    0.38
 -16   4  -2    1.63    0.36
 -16   4  -2    1.09    0.28
 -16   4  -2    0.75    0.45
  16   4   2    1.35    0.41
  17  -5  -2    0.39    0.34
 -17  -5   2    0.50    0.39
  17  -5  -2    0.47    0.55
 -17  -5   2    0.02    0.32
 -17   5   2    0.19    0.26
 -17   5   2    0.33    0.32
  17   5  -2    0.22    0.30
  17   5  -2    0.56    0.44
 -17   5   2    0.38    0.17
 -17   5   2    0.05    0.42
 -15  -5   2    0.18    0.23
  15  -5  -2    0.04    0.33
 -15  -5   2    0.02    0.29
  15  -5  -2    0.17    0.28
  15  -5  -2    0.26    0.24
 -15   5   2    0.12    0.24
  15   5  -2    0.16    0.21
 -15   5   2    0.10    0.12
  15   5  -2    0.10    0.30
 -15   5   2    0.35    0.29
 -15   5   2    0.10    0.20
  13  -5  -2    8.83    0.50
 -13  -5   2    8.78    0.49
  13  -5  -2    8.99    0.55
 -13  -5   2    9.26    0.52
  13  -5  -2    8.88    0.48
 -13   5   2    8.78    0.41
  13   5  -2    8.83    0.49
  13   5  -2    8.65    0.52
 -13   5   2    9.02    0.51
 -13   5   2    9.16    0.53
 -13   5   2    8.51    0.47
 -11  -5   2    4.26    0.31
  11  -5  -2    4.33    0.33
 -11  -5   2    4.09    0.29
  11  -5  -2    4.92    0.29
  11  -5  -2    4.03    0.30
 -11   5   2    4.48    0.31
  11   5  -2    4.27    0.28
  11   5  -2    4.78    0.30
 -11   5   2    4.39    0.28
 -11   5   2    4.58    0.21
  11   5  -2    3.96    0.31
 -11   5   2    4.62    0.33
   9  -5  -2    4.59    0.29
  -9  -5   2    4.48    0.25
   9  -5  -2    4.15    0.24
  -9  -5   2    4.10    0.26
  -9  -5   2    4.14    0.27
   9  -5  -2    4.37    0.26
  -9   5   2    4.35    0.28
   9   5  -2    4.11    0.24
  -9   5   2    3.79    0.26
   9   5  -2    4.02    0.26
  -9   5   2    4.02    0.19
  -9   5   2    4.07    0.24
   9   5  -2    3.59    0.24
  -7  -5   2    1.02    0.13
   7  -5  -2    0.92    0.13
  -7  -5   2    0.70    0.10
   7  -5  -2    1.16    0.13
   7  -5  -2    0.96    0.11
  -7  -5   2    1.09    0.13
  -7   5   2    0.77    0.12
   7   5  -2    1.03    0.11
  -7   5   2    0.98    0.13
   7   5  -2    1.01    0.12
   7   5  -2    0.84    0.10
  -7   5   2    0.80    0.11
  -5  -5   2  361.44   17.21
  -5  -5   2  400.47   17.22
   5  -5  -2  387.93   17.22
  -5  -5   2  441.85   17.22
   5   5  -2  425.60   17.21
   5   5  -2  382.38   17.22
  -5   5   2  378.21   17.22
  -3  -5   2    9.11    0.41
   3  -5  -2    8.41    0.41
   3  -5  -2    8.96    0.40
  -3  -5   2    9.27    0.42
  -3  -5   2    8.62    0.41
  -3  -5   2    9.26    0.40
   3  -5  -2    8.52    0.42
   3  -5  -2    8.87    0.42
  -3  -5   2    8.83    0.40
   3  -5  -2    9.02    0.41
   3   5  -2    9.42    0.40
  -3   5   2    9.17    0.42
   3   5  -2    9.19    0.42
  -3   5   2    8.58    0.40
   3   5  -2    9.42    0.41
   3   5  -2    8.61    0.41
   3   5  -2    8.62    0.40
  -3   5   2    8.16    0.41
   1  -5  -2   16.70    0.74
  -1  -5   2   16.22    0.73
   1  -5  -2   17.05    0.75
   1  -5  -2   16.53    0.74
  -1  -5   2   16.42    0.72
  -1  -5   2   16.40    0.74
  -1  -5   2   15.86    0.74
   1  -5  -2   16.89    0.75
   1  -5  -2   15.96    0.74
  -1   5   2   16.74    0.74
  -1   5   2   16.60    0.74
  -1   5   2   16.93    0.75
   1   5  -2   16.77    0.73
   1   5  -2   16.61    0.74
   1   5  -2   15.79    0.74
  -1   5   2   16.75    0.74
   1   5  -2   16.62    0.75
   1   5  -2   16.75    0.72
  -1   5   2   17.10    0.75
  -1  -5  -2   27.28    1.18
   1  -5   2   26.15    1.17
  -1  -5  -2   27.39    1.18
  -1  -5  -2   26.60    1.18
   1  -5   2   25.53    1.18
  -1  -5  -2   26.49    1.17
  -1  -5  -2   27.22    1.18
   1   5   2   26.62    1.18
  -1   5  -2   26.36    1.18
   1   5   2   26.37    1.18
   1   5   2   26.44    1.18
  -1   5  -2   25.57    1.18
  -1   5  -2   26.78    1.17
   1   5   2   27.16    1.18
  -3  -5  -2    0.63    0.08
   3  -5   2    0.89    0.11
   3  -5   2    0.74    0.09
  -3  -5  -2    0.69    0.09
   3  -5   2    0.67    0.05
  -3  -5  -2    0.90    0.10
  -3  -5  -2    0.65    0.08
  -3   5  -2    0.73    0.10
  -3   5  -2    0.64    0.10
   3   5   2    0.57    0.07
   3   5   2    0.76    0.09
   3   5   2    0.71    0.09
   3   5   2    0.56    0.10
  -3   5  -2    0.66    0.06
  -5  -5  -2    0.26    0.07
  -5  -5  -2    0.28    0.10
   5  -5   2    0.26    0.10
  -5  -5  -2    0.13    0.10
   5  -5   2    0.28    0.05
  -5  -5  -2    0.23    0.07
   5  -5   2    0.48    0.12
  -5   5  -2    0.47    0.11
  -5   5  -2    0.48    0.11
  -5   5  -2    0.30    0.06
   5   5   2    0.23    0.11
   5   5   2    0.23    0.09
   5   5   2    0.34    0.09
  -5   5  -2    0.28    0.08
  -7  -5  -2    0.57    0.13
  -7  -5  -2    0.65    0.11
  -7  -5  -2    0.40    0.13
   7  -5   2    0.60    0.16
   7  -5   2    0.52    0.13
   7  -5   2    0.54    0.08
   7  -5   2    0.42    0.13
  -7  -5  -2    0.61    0.08
  -7  -5  -2    0.58    0.09
   7   5   2    0.84    0.17
   7   5   2    0.56    0.13
   7   5   2    0.71    0.13
  -7   5  -2    0.29    0.12
  -7   5  -2    0.55    0.14
  -7   5  -2    0.56    0.10
  -7   5  -2    0.23    0.10
  -9  -5  -2   54.40    2.41
  -9  -5  -2   54.37    2.43
   9  -5   2   56.03    2.41
   9  -5   2   55.32    2.45
  -9  -5  -2   54.13    2.45
   9  -5   2   55.19    2.44
   9  -5   2   55.49    2.43
  -9  -5  -2   55.96    2.42
  -9  -5  -2   56.58    2.44
  -9   5  -2   54.48    2.42
   9   5   2   55.93    2.43
  -9   5  -2   56.60    2.43
   9   5   2   53.55    2.45
  -9   5  -2   54.52    2.46
  -9   5  -2   53.65    2.43
   9   5   2   53.95    2.45
 -11  -5  -2   54.99    2.33
 -11  -5  -2   55.75    2.37
 -11  -5  -2   52.63    2.35
  11  -5   2   54.23    2.38
  11  -5   2   52.67    2.35
 -11  -5  -2   51.99    2.32
  11  -5   2   53.67    2.33
  11  -5   2   50.82    2.36
 -11  -5  -2   51.81    2.37
  11   5   2   50.02    2.38
 -11   5  -2   53.45    2.38
  11   5   2   52.57    2.37
 -11   5  -2   53.12    2.34
 -11   5  -2   54.04    2.35
 -11   5  -2   53.81    2.34
  11   5   2   50.50    2.35
 -13  -5  -2    1.52    0.23
  13  -5   2    1.35    0.32
  13  -5   2    0.93    0.36
  13  -5   2    1.37    0.24
 -13  -5  -2    1.46    0.20
 -13  -5  -2    1.33    0.18
 -13  -5  -2    1.04    0.31
 -13  -5  -2    2.40    0.40
  13  -5   2    1.74    0.28
 -13   5  -2    1.41    0.32
 -13   5  -2    1.71    0.27
 -13   5  -2    1.38    0.21
 -13   5  -2    1.45    0.25
  13   5   2    1.93    0.38
  13   5   2    1.13    0.27
 -15  -5  -2    0.32    0.26
 -15  -5  -2    0.73    0.16
  15  -5   2    0.56    0.59
  15  -5   2    0.90    0.32
  15  -5   2    0.70    0.33
 -15  -5  -2    1.31    0.44
 -15   5  -2    0.73    0.24
 -15   5  -2    0.98    0.41
  15   5   2    0.62    0.33
  15   5   2    0.88    0.51
 -15   5  -2    1.31    0.33
  16  -6  -2    0.36    0.44
 -16  -6   2    0.51    0.38
  16  -6  -2    0.78    0.35
 -16  -6   2    0.74    0.29
  16   6  -2    0.30    0.26
 -16   6   2    0.30    0.25
  16   6  -2    0.67    0.39
 -16   6   2    0.75    0.39
 -16   6   2    0.34    0.29
 -16   6   2    0.60    0.12
 -14  -6   2    4.23    0.43
  14  -6  -2    4.01    0.48
  14  -6  -2    4.34    0.37
 -14   6   2    3.72    0.43
 -14   6   2    3.90    0.21
 -14   6   2    3.42    0.36
  14   6  -2    4.21    0.43
  14   6  -2    3.36    0.35
  14   6  -2    3.41    0.41
 -14   6   2    4.00    0.32
 -12  -6   2   -0.12    0.16
 -12  -6   2    0.03    0.20
  12  -6  -2   -0.02    0.18
  12  -6  -2   -0.10    0.18
  12  -6  -2    0.36    0.26
 -12   6   2    0.12    0.06
 -12   6   2    0.41    0.17
 -12   6   2    0.06    0.15
  12   6  -2   -0.14    0.18
  12   6  -2    0.18    0.21
  12   6  -2   -0.13    0.15
 -12   6   2   -0.04    0.21
  10  -6  -2    0.33    0.18
 -10  -6   2    0.28    0.13
  10  -6  -2    0.08    0.14
  10  -6  -2    0.19    0.15
 -10  -6   2    0.13    0.16
 -10   6   2    0.30    0.04
 -10   6   2    0.30    0.13
  10   6  -2    0.35    0.14
 -10   6   2    0.29    0.17
  10   6  -2    0.11    0.15
 -10   6   2    0.15    0.14
  10   6  -2    0.12    0.12
  -8  -6   2    0.15    0.13
  -8  -6   2    0.06    0.10
   8  -6  -2    0.04    0.13
   8  -6  -2    0.11    0.11
   8  -6  -2    0.02    0.11
  -8  -6   2    0.05    0.09
  -8   6   2    0.02    0.11
   8   6  -2   -0.08    0.12
   8   6  -2   -0.02    0.10
  -8   6   2   -0.04    0.10
  -8   6   2    0.09    0.03
  -6  -6   2    7.71    0.40
   6  -6  -2    8.40    0.41
   6  -6  -2    8.52    0.41
  -6  -6   2    8.11    0.40
  -6  -6   2    8.44    0.42
   6  -6  -2    7.65    0.42
  -6  -6   2    8.62    0.40
   6   6  -2    8.70    0.39
   6   6  -2    7.85    0.36
  -6   6   2    8.58    0.37
   6   6  -2    8.29    0.41
   6   6  -2    8.59    0.41
  -6   6   2    8.71    0.42
  -6   6   2    8.21    0.41
  -6   6   2    8.26    0.37
   4  -6  -2   63.92    2.72
  -4  -6   2   63.16    2.71
   4  -6  -2   59.92    2.71
  -4  -6   2   61.22    2.71
  -4  -6   2   61.42    2.70
  -4  -6   2   64.16    2.72
   4  -6  -2   60.68    2.72
   4  -6  -2   63.22    2.72
   4  -6  -2   63.11    2.70
   4  -6  -2   62.15    2.72
  -4  -6   2   63.06    2.71
  -4   6   2   60.58    2.70
  -4   6   2   62.28    2.72
   4   6  -2   61.35    2.72
   4   6  -2   63.02    2.72
   4   6  -2   62.26    2.70
   4   6  -2   61.68    2.70
  -4   6   2   59.11    2.72
   2  -6  -2   57.91    2.52
   2  -6  -2   58.84    2.53
  -2  -6   2   57.55    2.52
  -2  -6   2   59.03    2.53
   2  -6  -2   58.24    2.53
  -2  -6   2   56.70    2.51
   2  -6  -2   57.24    2.52
  -2  -6   2   58.04    2.50
  -2  -6   2   55.41    2.52
   2  -6  -2   57.71    2.51
   2   6  -2   54.39    2.52
  -2   6   2   56.58    2.51
   2   6  -2   59.30    2.50
  -2   6   2   57.85    2.53
  -2   6   2   59.02    2.53
   2   6  -2   57.77    2.52
   2   6  -2   56.91    2.52
   2   6  -2   56.52    2.51
  -2   6   2   58.35    2.52
   0  -6  -2   12.07    0.55
   0  -6   2   12.08    0.54
   0  -6  -2   11.82    0.54
   0  -6   2   12.06    0.55
   0  -6   2   11.55    0.52
   0  -6  -2   11.93    0.56
   0  -6  -2   12.59    0.55
   0  -6  -2   12.59    0.56
   0   6  -2   11.63    0.55
   0   6  -2   12.07    0.54
   0   6   2   11.62    0.55
   0   6  -2   11.90    0.56
   0   6   2   11.84    0.55
   0   6  -2   11.74    0.55
   0   6   2   11.60    0.55
   0   6   2   12.38    0.56
   2  -6   2    3.21    0.14
   2  -6   2    3.41    0.18
   2  -6   2    3.31    0.20
  -2  -6  -2    2.85    0.18
  -2  -6  -2    3.10    0.20
   2  -6   2    2.85    0.19
  -2  -6  -2    2.81    0.18
   2  -6   2    3.02    0.14
  -2  -6  -2    3.29    0.17
  -2  -6  -2    2.98    0.17
   2   6   2    3.13    0.18
   2   6   2    3.08    0.20
   2   6   2    2.91    0.18
  -2   6  -2    3.08    0.18
  -2   6  -2    2.78    0.19
  -2   6  -2    3.22    0.17
   2   6   2    2.89    0.18
   4  -6   2    6.47    0.30
  -4  -6  -2    7.30    0.35
   4  -6   2    6.72    0.34
  -4  -6  -2    6.47    0.32
   4  -6   2    6.68    0.35
  -4  -6  -2    6.54    0.32
  -4  -6  -2    6.22    0.34
  -4   6  -2    6.27    0.31
   4   6   2    7.10    0.36
   4   6   2    7.07    0.33
   4   6   2    6.93    0.34
  -4   6  -2    6.65    0.35
  -4   6  -2    6.42    0.33
  -4   6  -2    6.42    0.35
   4   6   2    7.06    0.34
  -6  -6  -2    2.08    0.21
   6  -6   2    3.26    0.23
   6  -6   2    2.73    0.21
  -6  -6  -2    2.92    0.18
  -6  -6  -2    2.45    0.17
   6  -6   2    2.63    0.15
  -6  -6  -2    3.36    0.23
   6   6   2    2.55    0.21
  -6   6  -2    2.90    0.17
  -6   6  -2    2.76    0.22
   6   6   2    2.63    0.23
   6   6   2    2.38    0.20
  -6   6  -2    2.91    0.23
  -6   6  -2    3.01    0.19
  -8  -6  -2    0.90    0.18
   8  -6   2    0.50    0.21
  -8  -6  -2    0.49    0.11
   8  -6   2    0.76    0.10
  -8  -6  -2    0.57    0.11
  -8  -6  -2    0.66    0.18
  -8  -6  -2    0.46    0.09
   8  -6   2    0.69    0.16
   8   6   2    0.41    0.15
  -8   6  -2    0.39    0.17
  -8   6  -2    0.39    0.16
   8   6   2    0.85    0.21
  -8   6  -2    0.74    0.13
   8   6   2    0.39    0.15
  -8   6  -2    0.81    0.12
  10  -6   2   13.55    0.65
  10  -6   2   14.23    0.70
 -10  -6  -2   13.30    0.64
  10  -6   2   14.12    0.73
 -10  -6  -2   14.03    0.71
 -10  -6  -2   13.31    0.67
  10  -6   2   13.13    0.69
 -10  -6  -2   14.27    0.72
 -10  -6  -2   13.65    0.65
 -10   6  -2   15.22    0.73
  10   6   2   13.98    0.71
  10   6   2   14.36    0.69
 -10   6  -2   13.83    0.67
 -10   6  -2   14.54    0.67
  10   6   2   14.56    0.76
 -10   6  -2   13.83    0.69
 -12  -6  -2    1.67    0.19
 -12  -6  -2    1.73    0.30
 -12  -6  -2    2.35    0.31
  12  -6   2    1.41    0.35
  12  -6   2    1.82    0.22
 -12  -6  -2    1.98    0.25
  12  -6   2    1.36    0.25
 -12  -6  -2    1.77    0.17
  12  -6   2    1.89    0.43
 -12   6  -2    2.04    0.24
  12   6   2    1.83    0.30
 -12   6  -2    1.96    0.32
  12   6   2    2.40    0.38
 -12   6  -2    1.96    0.29
  12   6   2    2.01    0.29
 -12   6  -2    2.05    0.23
 -14  -6  -2    0.19    0.35
 -14  -6  -2    0.17    0.24
  14  -6   2    1.00    0.49
 -14  -6  -2    0.59    0.19
  14  -6   2    0.27    0.43
  14  -6   2   -0.13    0.26
 -14   6  -2    0.27    0.29
 -14   6  -2    0.45    0.25
 -14   6  -2    0.20    0.23
 -14   6  -2    0.25    0.36
  14   6   2    0.33    0.30
  14   6   2   -0.03    0.44
 -17  -7   2    0.25    0.36
  17  -7  -2    0.40    0.62
  17   7  -2    0.52    0.52
 -17   7   2    0.21    0.36
 -17   7   2    0.21    0.42
  17   7  -2    0.48    0.33
 -17   7   2    0.51    0.29
 -15  -7   2   -0.04    0.35
  15  -7  -2   -0.29    0.30
 -15  -7   2    0.06    0.25
  15  -7  -2   -0.15    0.31
  15  -7  -2   -0.04    0.40
  15   7  -2    0.04    0.34
 -15   7   2   -0.12    0.30
 -15   7   2   -0.38    0.27
 -15   7   2    0.15    0.22
  15   7  -2    0.01    0.24
  13  -7  -2    2.05    0.26
 -13  -7   2    2.73    0.32
  13  -7  -2    2.37    0.29
 -13  -7   2    2.31    0.28
  13  -7  -2    2.68    0.36
  13   7  -2    2.04    0.28
 -13   7   2    2.44    0.32
 -13   7   2    2.83    0.33
 -13   7   2    2.12    0.25
  13   7  -2    1.98    0.28
  13   7  -2    2.48    0.32
  11  -7  -2    2.06    0.25
 -11  -7   2    2.10    0.26
  11  -7  -2    1.36    0.26
 -11  -7   2    1.24    0.19
  11  -7  -2    2.10    0.22
 -11   7   2    1.62    0.21
  11   7  -2    1.41    0.23
 -11   7   2    1.56    0.23
  11   7  -2    1.51    0.21
 -11   7   2    1.81    0.22
  11   7  -2    1.43    0.19
   9  -7  -2    0.20    0.15
  -9  -7   2   -0.01    0.16
   9  -7  -2    0.08    0.19
   9  -7  -2    0.24    0.14
  -9  -7   2    0.05    0.12
  -9   7   2    0.65    0.14
   9   7  -2    0.25    0.12
  -9   7   2    0.29    0.04
   9   7  -2    0.29    0.15
   9   7  -2    0.24    0.13
  -9   7   2    0.28    0.16
   7  -7  -2    6.88    0.34
  -7  -7   2    6.24    0.34
   7  -7  -2    5.67    0.36
  -7  -7   2    6.19    0.35
  -7  -7   2    7.03    0.33
  -7  -7   2    6.41    0.34
   7  -7  -2    6.57    0.33
  -7   7   2    6.16    0.33
   7   7  -2    6.81    0.34
  -7   7   2    5.28    0.35
  -7   7   2    6.23    0.29
  -7   7   2    6.15    0.29
   7   7  -2    6.13    0.34
   7   7  -2    6.55    0.32
  -5  -7   2   12.91    0.59
   5  -7  -2   12.97    0.61
  -5  -7   2   13.31    0.60
  -5  -7   2   12.97    0.58
   5  -7  -2   13.06    0.61
  -5  -7   2   13.25    0.62
  -5  -7   2   12.80    0.61
   5  -7  -2   12.51    0.62
   5  -7  -2   13.53    0.62
  -5   7   2   13.37    0.61
  -5   7   2   12.55    0.58
   5   7  -2   12.89    0.58
  -5   7   2   12.28    0.61
   5   7  -2   13.10    0.61
   5   7  -2   13.59    0.59
   5   7  -2   12.60    0.61
   3  -7  -2   41.05    1.88
   3  -7  -2   43.59    1.89
  -3  -7   2   42.82    1.87
   3  -7  -2   44.20    1.88
  -3  -7   2   42.51    1.87
   3  -7  -2   42.09    1.89
  -3  -7   2   45.15    1.89
   3  -7  -2   42.83    1.87
  -3  -7   2   42.23    1.88
  -3   7   2   40.85    1.89
   3   7  -2   43.98    1.89
   3   7  -2   43.63    1.86
   3   7  -2   41.24    1.90
  -3   7   2   40.94    1.87
   3   7  -2   41.33    1.88
   3   7  -2   44.49    1.87
  -1  -7   2   38.44    1.69
   1  -7  -2   39.68    1.70
  -1  -7   2   38.26    1.68
   1  -7  -2   37.96    1.71
   1  -7  -2   37.90    1.69
  -1  -7   2   39.76    1.70
  -1  -7   2   37.49    1.71
   1  -7  -2   38.61    1.71
   1  -7  -2   39.03    1.69
  -1   7   2   37.98    1.70
   1   7  -2   39.12    1.69
   1   7  -2   37.23    1.70
   1   7  -2   38.35    1.70
  -1   7   2   37.87    1.71
   1   7  -2   39.89    1.71
  -1   7   2   39.11    1.70
   1   7  -2   38.67    1.68
  -1   7   2   39.28    1.70
  -1   7   2   37.06    1.69
   1  -7   2    0.91    0.11
   1  -7   2    1.00    0.13
  -1  -7  -2    1.06    0.13
  -1  -7  -2    1.07    0.14
  -1  -7  -2    1.15    0.12
  -1  -7  -2    0.99    0.10
   1  -7   2    0.95    0.13
  -1  -7  -2    1.13    0.12
   1   7   2    1.08    0.15
  -1   7  -2    0.90    0.13
  -1   7  -2    0.87    0.12
   1   7   2    1.06    0.11
   1   7   2    1.08    0.12
  -1   7  -2    1.00    0.10
   1   7   2    1.04    0.11
  -3  -7  -2   10.48    0.51
   3  -7   2   10.82    0.50
   3  -7   2   11.12    0.52
  -3  -7  -2   10.92    0.52
   3  -7   2   10.84    0.47
  -3  -7  -2   10.53    0.49
  -3  -7  -2   10.84    0.51
   3  -7   2   10.31    0.52
   3  -7   2   10.34    0.47
  -3  -7  -2   11.19    0.50
  -3   7  -2   10.61    0.52
  -3   7  -2   10.50    0.50
   3   7   2   11.12    0.51
   3   7   2   10.56    0.52
   3   7   2   10.78    0.51
  -3   7  -2   10.33    0.52
  -3   7  -2    9.72    0.50
   3   7   2   10.75    0.50
   5  -7   2   14.79    0.70
  -5  -7  -2   15.33    0.69
  -5  -7  -2   15.50    0.69
  -5  -7  -2   14.67    0.71
  -5  -7  -2   15.88    0.71
   5  -7   2   15.51    0.67
   5  -7   2   14.91    0.72
  -5   7  -2   13.93    0.67
  -5   7  -2   15.45    0.72
   5   7   2   15.55    0.72
   5   7   2   14.72    0.70
  -5   7  -2   15.16    0.70
   5   7   2   14.98    0.71
  -5   7  -2   15.01    0.71
   7  -7   2    0.85    0.19
  -7  -7  -2    0.94    0.12
  -7  -7  -2    0.59    0.17
  -7  -7  -2    0.68    0.11
  -7  -7  -2    0.63    0.16
   7  -7   2    0.55    0.08
   7  -7   2    0.64    0.16
   7   7   2    0.57    0.15
  -7   7  -2    0.66    0.18
  -7   7  -2    0.80    0.13
  -7   7  -2    0.60    0.10
   7   7   2    0.73    0.15
  -7   7  -2    0.90    0.17
   7   7   2    0.65    0.19
  -9  -7  -2    0.13    0.09
  -9  -7  -2    0.06    0.13
   9  -7   2   -0.12    0.23
  -9  -7  -2    0.16    0.11
   9  -7   2    0.03    0.18
  -9  -7  -2    0.22    0.19
   9  -7   2    0.20    0.11
  -9  -7  -2    0.14    0.20
   9   7   2    0.17    0.23
   9   7   2   -0.08    0.17
  -9   7  -2    0.32    0.19
   9   7   2    0.03    0.17
  -9   7  -2    0.12    0.14
  -9   7  -2    0.06    0.18
  -9   7  -2   -0.12    0.12
 -11  -7  -2    1.91    0.28
 -11  -7  -2    1.91    0.22
  11  -7   2    1.86    0.35
 -11  -7  -2    2.51    0.18
 -11  -7  -2    2.34    0.31
  11  -7   2    2.35    0.24
 -11  -7  -2    2.64    0.22
  11   7   2    2.35    0.34
 -11   7  -2    2.04    0.26
  11   7   2    2.36    0.30
 -11   7  -2    2.43    0.33
  11   7   2    3.18    0.31
 -11   7  -2    2.53    0.32
 -11   7  -2    2.17    0.25
 -13  -7  -2    0.96    0.25
  13  -7   2    1.08    0.24
 -13  -7  -2    1.10    0.14
 -13  -7  -2    1.14    0.18
  13  -7   2    1.20    0.43
  13  -7   2    1.30    0.43
 -13  -7  -2    1.26    0.32
 -13   7  -2    1.03    0.23
 -13   7  -2    1.56    0.28
  13   7   2    1.68    0.31
 -13   7  -2    1.61    0.31
 -13   7  -2    1.58    0.36
  13   7   2    1.14    0.43
 -15  -7  -2   -0.14    0.42
  15  -7   2    0.17    0.61
 -15  -7  -2    0.12    0.29
 -15  -7  -2    0.12    0.19
  15  -7   2   -0.07    0.34
 -15  -7  -2    0.10    0.14
 -15   7  -2    0.43    0.34
  15   7   2   -0.07    0.59
 -15   7  -2    0.04    0.28
 -15   7  -2    0.04    0.26
  15   7   2   -0.11    0.35
 -15   7  -2    0.09    0.43
  16  -8  -2    4.32    0.59
 -16  -8   2    4.01    0.47
 -16   8   2    3.33    0.42
 -16   8   2    4.57    0.50
  16   8  -2    3.55    0.52
  16   8  -2    4.68    0.49
 -16   8   2    4.20    0.58
  14  -8  -2    3.73    0.35
 -14  -8   2    2.91    0.31
  14  -8  -2    2.77    0.35
 -14  -8   2    2.75    0.41
  14  -8  -2    2.53    0.43
 -14   8   2    2.27    0.32
 -14   8   2    2.32    0.32
  14   8  -2    2.92    0.39
  14   8  -2    2.88    0.36
 -14   8   2    2.18    0.37
 -12  -8   2    2.54    0.27
  12  -8  -2    2.66    0.32
  12  -8  -2    3.05    0.39
  12  -8  -2    2.33    0.28
 -12   8   2    2.62    0.36
  12   8  -2    2.67    0.30
 -12   8   2    2.38    0.28
  12   8  -2    3.22    0.35
  10  -8  -2   16.22    0.78
  10  -8  -2   17.43    0.82
 -10  -8   2   17.07    0.78
 -10  -8   2   17.11    0.81
 -10  -8   2   16.03    0.80
  10  -8  -2   15.63    0.78
  10   8  -2   16.16    0.80
  10   8  -2   16.20    0.78
 -10   8   2   15.57    0.78
 -10   8   2   16.06    0.72
  10   8  -2   15.79    0.78
 -10   8   2   17.37    0.81
   8  -8  -2   25.51    1.10
  -8  -8   2   24.94    1.11
  -8  -8   2   23.51    1.10
   8  -8  -2   24.60    1.09
   8  -8  -2   23.88    1.12
  -8  -8   2   23.22    1.08
   8  -8  -2   24.20    1.12
   8   8  -2   22.25    1.09
   8   8  -2   24.20    1.08
  -8   8   2   23.73    1.05
   8   8  -2   24.21    1.10
  -8   8   2   23.61    1.11
  -8   8   2   24.11    1.10
  -8   8   2   23.91    1.06
  -6  -8   2    3.36    0.19
   6  -8  -2    3.10    0.22
   6  -8  -2    3.17    0.22
   6  -8  -2    3.24    0.24
  -6  -8   2    3.04    0.23
   6  -8  -2    3.64    0.26
  -6  -8   2    3.26    0.16
  -6  -8   2    2.98    0.25
  -6   8   2    3.07    0.24
  -6   8   2    3.10    0.16
   6   8  -2    2.88    0.19
  -6   8   2    3.10    0.22
   6   8  -2    2.89    0.21
   6   8  -2    3.78    0.35
   6   8  -2    2.66    0.16
   4  -8  -2   66.80    2.99
  -4  -8   2   65.58    3.00
  -4  -8   2   68.90    2.96
   4  -8  -2   69.64    2.99
  -4  -8   2   67.58    2.98
   4  -8  -2   69.38    2.96
   4  -8  -2   65.80    2.97
   4  -8  -2   69.94    2.97
  -4  -8   2   68.16    2.95
   4   8  -2   66.54    2.98
   4   8  -2   68.24    2.96
  -4   8   2   66.59    2.98
   4   8  -2   66.76    2.95
  -4   8   2   70.24    2.96
   4   8  -2   66.59    2.98
  -4   8   2   68.34    2.98
   2  -8  -2  109.99    4.95
  -2  -8   2  112.75    4.96
   2  -8  -2  116.19    4.95
  -2  -8   2  107.33    4.95
   2  -8  -2  112.15    4.96
   2  -8  -2  118.24    4.97
  -2  -8   2  112.88    4.93
  -2  -8   2  114.27    4.94
   2  -8  -2  120.52    4.95
   2   8  -2  122.21    5.02
   2   8  -2  112.00    4.93
   2   8  -2  110.51    4.96
  -2   8   2  114.79    4.97
  -2   8   2  115.55    4.96
   2   8  -2  103.99    4.97
  -2   8   2  116.27    4.96
  -2   8   2  110.56    4.94
   2   8  -2  114.24    4.94
   0  -8   2    0.78    0.10
   0  -8  -2    0.84    0.13
   0  -8  -2    0.79    0.11
   0  -8  -2    0.94    0.13
   0  -8  -2    0.61    0.09
   0  -8   2    0.63    0.11
   0  -8   2    0.77    0.05
   0  -8  -2    0.85    0.11
   0  -8   2    0.81    0.12
   0   8  -2    0.77    0.13
   0   8  -2    0.65    0.09
   0   8   2    1.01    0.12
   0   8   2    0.58    0.09
   0   8  -2    0.79    0.11
   0   8  -2    0.93    0.13
   0   8   2    0.98    0.11
   0   8   2    0.94    0.14
  -2  -8  -2   36.90    1.60
   2  -8   2   34.93    1.60
  -2  -8  -2   36.26    1.58
   2  -8   2   38.14    1.60
   2  -8   2   35.60    1.56
  -2  -8  -2   34.06    1.58
   2  -8   2   35.22    1.59
  -2  -8  -2   34.91    1.60
  -2  -8  -2   36.04    1.59
   2   8   2   34.97    1.60
   2   8   2   35.57    1.59
   2   8   2   35.81    1.59
  -2   8  -2   37.89    1.61
   2   8   2   36.67    1.59
  -2   8  -2   35.35    1.59
  -4  -8  -2   21.52    0.92
   4  -8   2   21.71    0.94
  -4  -8  -2   21.68    0.96
   4  -8   2   19.25    0.95
  -4  -8  -2   19.73    0.92
   4  -8   2   20.59    0.90
  -4  -8  -2   20.45    0.95
  -4  -8  -2   21.96    0.95
   4  -8   2   20.54    0.95
   4   8   2   20.83    0.94
  -4   8  -2   19.92    0.93
  -4   8  -2   20.00    0.95
   4   8   2   21.19    0.96
  -4   8  -2   19.63    0.94
   4   8   2   20.48    0.94
   4   8   2   20.08    0.93
  -4   8  -2   20.12    0.95
  -6  -8  -2   15.36    0.71
   6  -8   2   15.51    0.69
  -6  -8  -2   15.63    0.75
  -6  -8  -2   16.23    0.72
   6  -8   2   15.30    0.76
   6  -8   2   15.18    0.76
  -6  -8  -2   15.97    0.75
   6  -8   2   15.24    0.73
  -6   8  -2   15.11    0.73
   6   8   2   14.89    0.74
  -6   8  -2   16.02    0.75
   6   8   2   16.55    0.74
  -6   8  -2   14.73    0.75
   6   8   2   16.25    0.76
   8  -8   2   12.73    0.57
  -8  -8  -2   12.69    0.64
   8  -8   2   13.31    0.63
  -8  -8  -2   11.77    0.64
  -8  -8  -2   12.14    0.57
  -8  -8  -2   12.58    0.58
  -8  -8  -2   11.81    0.59
   8  -8   2   13.24    0.66
  -8   8  -2   12.36    0.58
   8   8   2   12.05    0.63
  -8   8  -2   11.98    0.64
   8   8   2   11.34    0.61
  -8   8  -2   11.73    0.60
  -8   8  -2   11.77    0.65
   8   8   2   12.77    0.65
 -10  -8  -2    6.65    0.45
  10  -8   2    6.75    0.51
 -10  -8  -2    5.80    0.34
  10  -8   2    6.05    0.36
 -10  -8  -2    5.33    0.49
 -10  -8  -2    6.16    0.32
 -10  -8  -2    5.83    0.38
 -10   8  -2    6.82    0.38
  10   8   2    5.57    0.43
 -10   8  -2    6.63    0.43
 -10   8  -2    6.28    0.37
  10   8   2    6.98    0.50
 -10   8  -2    6.66    0.47
  10   8   2    6.38    0.44
  12  -8   2    4.42    0.47
 -12  -8  -2    4.75    0.30
  12  -8   2    4.48    0.59
 -12  -8  -2    4.76    0.27
  12  -8   2    4.67    0.35
 -12  -8  -2    4.44    0.35
 -12   8  -2    4.63    0.46
 -12   8  -2    4.98    0.44
 -12   8  -2    4.78    0.37
  12   8   2    4.40    0.53
  12   8   2    5.37    0.45
  14  -8   2    0.93    0.30
 -14  -8  -2    0.45    0.27
 -14  -8  -2    0.94    0.14
 -14  -8  -2    0.91    0.18
  14  -8   2    0.69    0.54
 -14  -8  -2    0.87    0.41
 -14   8  -2    0.76    0.26
 -14   8  -2    0.80    0.26
 -14   8  -2    0.42    0.39
 -14   8  -2    1.22    0.33
  14   8   2    1.12    0.53
  14   8   2    0.94    0.35
 -15  -9   2    1.02    0.30
  15  -9  -2    1.73    0.38
  15  -9  -2    1.91    0.50
 -15   9   2    1.35    0.42
  15   9  -2    1.29    0.43
 -15   9   2    1.30    0.29
  15   9  -2    1.39    0.31
 -13  -9   2    0.78    0.35
  13  -9  -2    0.63    0.36
  13  -9  -2    0.10    0.29
  13  -9  -2    0.56    0.26
  13   9  -2    0.50    0.29
  13   9  -2    0.40    0.30
 -13   9   2    0.41    0.22
  13   9  -2    0.84    0.24
 -13   9   2    0.55    0.31
  11  -9  -2    1.76    0.26
 -11  -9   2    1.68    0.29
 -11  -9   2    1.54    0.21
  11  -9  -2    1.90    0.31
  11  -9  -2    1.94    0.24
 -11  -9   2    2.25    0.48
  11   9  -2    1.35    0.26
  11   9  -2    1.41    0.22
  11   9  -2    1.59    0.23
 -11   9   2    1.60    0.27
 -11   9   2    1.80    0.23
  -9  -9   2    2.65    0.23
   9  -9  -2    3.08    0.27
   9  -9  -2    2.90    0.31
  -9  -9   2    3.07    0.32
   9  -9  -2    2.90    0.28
  -9  -9   2    2.90    0.30
   9  -9  -2    3.16    0.33
   9   9  -2    3.02    0.26
   9   9  -2    2.91    0.29
  -9   9   2    2.82    0.15
  -9   9   2    2.74    0.29
   9   9  -2    2.94    0.25
  -9   9   2    2.22    0.24
  -9   9   2    2.62    0.17
   7  -9  -2    0.59    0.19
  -7  -9   2    1.10    0.20
   7  -9  -2    0.44    0.17
  -7  -9   2    0.67    0.18
   7  -9  -2    0.49    0.16
  -7  -9   2    0.52    0.07
  -7  -9   2    0.76    0.12
   7  -9  -2    0.81    0.16
  -7   9   2    0.34    0.14
   7   9  -2    0.44    0.16
   7   9  -2    0.52    0.06
  -7   9   2    0.24    0.16
  -7   9   2    0.47    0.07
   7   9  -2    0.65    0.14
   7   9  -2    0.32    0.12
  -7   9   2    0.67    0.11
   5  -9  -2   31.69    1.46
   5  -9  -2   33.01    1.51
   5  -9  -2   32.89    1.48
  -5  -9   2   32.43    1.47
   5  -9  -2   34.39    1.46
  -5  -9   2   31.76    1.43
  -5  -9   2   32.09    1.44
   5  -9  -2   32.06    1.46
  -5  -9   2   33.33    1.48
  -5   9   2   32.31    1.48
   5   9  -2   32.41    1.43
  -5   9   2   31.97    1.46
   5   9  -2   32.20    1.46
   5   9  -2   33.86    1.44
   5   9  -2   34.43    1.47
  -5   9   2   31.95    1.44
   3  -9  -2   71.18    3.14
   3  -9  -2   70.49    3.15
  -3  -9   2   74.92    3.16
  -3  -9   2   71.82    3.16
   3  -9  -2   71.23    3.17
   3  -9  -2   72.58    3.15
  -3  -9   2   70.47    3.13
  -3  -9   2   72.51    3.14
   3  -9  -2   70.95    3.17
   3   9  -2   73.36    3.13
  -3   9   2   69.55    3.14
   3   9  -2   71.21    3.16
   3   9  -2   71.11    3.14
   3   9  -2   75.53    3.17
   3   9  -2   68.69    3.16
  -3   9   2   73.45    3.17
  -3   9   2   72.55    3.16
  -3   9   2   72.48    3.16
   1  -9  -2   30.31    1.32
  -1  -9   2   29.39    1.29
   1  -9  -2   30.62    1.32
  -1  -9   2   29.03    1.28
   1  -9  -2   30.76    1.30
  -1  -9   2   29.57    1.31
   1  -9  -2   27.74    1.30
  -1  -9   2   28.48    1.32
   1  -9  -2   30.53    1.30
  -1   9   2   29.03    1.30
   1   9  -2   29.08    1.28
   1   9  -2   29.10    1.32
   1   9  -2   26.89    1.30
   1   9  -2   27.38    1.29
  -1   9   2   30.63    1.32
  -1   9   2   29.98    1.31
  -1   9   2   29.35    1.32
   1   9  -2   28.33    1.31
  -1   9   2   28.12    1.30
  -1  -9  -2   22.88    1.04
   1  -9   2   23.89    1.12
   1  -9   2   22.60    1.01
  -1  -9  -2   22.21    1.03
  -1  -9  -2   22.57    1.05
   1  -9   2   23.44    1.05
   1  -9   2   23.00    1.00
  -1  -9  -2   23.30    1.03
  -1  -9  -2   23.37    1.06
   1  -9   2   23.10    1.04
   1   9   2   23.07    1.04
  -1   9  -2   22.17    1.04
  -1   9  -2   22.63    1.05
   1   9   2   23.81    1.06
  -1   9  -2   22.71    1.03
   1   9   2   22.41    1.04
   1   9   2   23.12    1.04
  -1   9  -2   24.14    1.06
  -3  -9  -2    7.17    0.42
   3  -9   2    6.99    0.38
  -3  -9  -2    7.84    0.37
   3  -9   2    7.47    0.33
   3  -9   2    7.21    0.40
  -3  -9  -2    7.73    0.40
  -3  -9  -2    8.02    0.37
   3  -9   2    7.37    0.33
   3  -9   2    7.07    0.41
  -3  -9  -2    7.17    0.39
  -3   9  -2    7.42    0.40
   3   9   2    7.67    0.39
   3   9   2    6.46    0.37
  -3   9  -2    7.66    0.38
  -3   9  -2    7.21    0.38
   3   9   2    7.18    0.39
   3   9   2    7.63    0.42
  -5  -9  -2   32.06    1.42
  -5  -9  -2   33.56    1.45
   5  -9   2   30.89    1.40
   5  -9   2   31.75    1.46
  -5  -9  -2   31.01    1.45
  -5  -9  -2   31.37    1.43
  -5  -9  -2   33.32    1.46
   5  -9   2   31.46    1.46
   5  -9   2   32.79    1.44
  -5   9  -2   30.74    1.46
  -5   9  -2   32.61    1.44
   5   9   2   32.85    1.46
  -5   9  -2   32.76    1.45
  -5   9  -2   31.19    1.43
   5   9   2   32.75    1.45
   5   9   2   32.40    1.43
   5   9   2   31.61    1.44
   7  -9   2   12.86    0.61
  -7  -9  -2   13.10    0.64
  -7  -9  -2   13.89    0.68
  -7  -9  -2   13.21    0.68
   7  -9   2   14.01    0.71
  -7  -9  -2   13.86    0.63
   7  -9   2   13.65    0.67
   7  -9   2   12.81    0.69
   7   9   2   13.85    0.67
   7   9   2   14.23    0.70
  -7   9  -2   13.75    0.68
  -7   9  -2   13.66    0.65
  -7   9  -2   13.11    0.65
   7   9   2   12.50    0.66
  -7   9  -2   13.03    0.68
  -9  -9  -2   11.59    0.57
   9  -9   2   11.33    0.66
  -9  -9  -2   11.50    0.61
   9  -9   2   11.22    0.53
  -9  -9  -2   10.60    0.53
  -9  -9  -2   10.91    0.53
  -9   9  -2   11.52    0.61
  -9   9  -2   10.68    0.57
   9   9   2   11.52    0.66
  -9   9  -2   10.75    0.62
   9   9   2   11.45    0.61
   9   9   2   11.00    0.75
  11  -9   2    5.81    0.55
 -11  -9  -2    6.18    0.65
 -11  -9  -2    5.64    0.30
  11  -9   2    5.62    0.49
 -11  -9  -2    5.76    0.33
 -11  -9  -2    5.91    0.39
  11  -9   2    5.49    0.35
 -11  -9  -2    5.47    0.57
  11   9   2    6.43    0.57
  11   9   2    5.73    0.44
 -11   9  -2    5.32    0.49
 -11   9  -2    5.56    0.38
 -11   9  -2    5.88    0.45
  13  -9   2    0.02    0.23
 -13  -9  -2    0.19    0.15
 -13  -9  -2   -0.19    0.34
  13  -9   2   -0.11    0.55
 -13  -9  -2   -0.10    0.24
 -13  -9  -2    0.12    0.11
 -13   9  -2    0.04    0.24
 -13   9  -2    0.40    0.31
  13   9   2    0.12    0.48
 -13   9  -2   -0.21    0.24
 -13   9  -2    0.18    0.40
  13   9   2   -0.13    0.31
  14 -10  -2    1.61    0.34
  14 -10  -2    1.32    0.48
 -14 -10   2    1.28    0.30
 -14  10   2    1.36    0.38
  14  10  -2    1.87    0.31
 -14  10   2    1.22    0.29
  14  10  -2    1.39    0.41
  12 -10  -2    4.12    0.41
 -12 -10   2    3.87    0.50
  12 -10  -2    4.15    0.54
 -12 -10   2    4.20    0.34
  12 -10  -2    5.05    0.48
  12 -10  -2    4.47    0.39
 -12 -10   2    4.64    0.50
  12  10  -2    4.75    0.43
  12  10  -2    4.47    0.45
 -12  10   2    3.98    0.38
 -12  10   2    4.02    0.46
  12  10  -2    5.26    0.43
 -10 -10   2    0.27    0.27
  10 -10  -2    0.49    0.27
  10 -10  -2    0.53    0.24
  10 -10  -2    0.24    0.20
 -10 -10   2    0.41    0.46
 -10 -10   2    0.26    0.16
 -10  10   2    0.17    0.19
  10  10  -2    0.35    0.17
 -10  10   2    0.41    0.09
 -10  10   2    0.31    0.07
  10  10  -2    0.17    0.19
  10  10  -2    0.21    0.24
 -10  10   2    0.40    0.23
   8 -10  -2    8.87    0.49
   8 -10  -2    9.89    0.53
  -8 -10   2    8.86    0.46
  -8 -10   2    9.45    0.54
   8 -10  -2    9.79    0.55
   8 -10  -2    9.10    0.48
  -8 -10   2    8.75    0.52
   8  10  -2    8.80    0.51
   8  10  -2   10.03    0.48
   8  10  -2    8.95    0.49
  -8  10   2    9.38    0.45
  -8  10   2    9.15    0.43
  -8  10   2    8.59    0.48
  -8  10   2    8.95    0.51
   6 -10  -2    2.20    0.22
  -6 -10   2    1.93    0.17
   6 -10  -2    2.27    0.25
   6 -10  -2    2.01    0.22
   6 -10  -2    2.12    0.20
  -6 -10   2    2.00    0.28
  -6 -10   2    1.91    0.25
  -6 -10   2    2.23    0.14
   6 -10  -2    2.21    0.28
  -6  10   2    2.36    0.22
  -6  10   2    1.98    0.15
   6  10  -2    1.65    0.20
   6  10  -2    2.02    0.14
   6  10  -2    2.51    0.24
  -6  10   2    2.30    0.26
   4 -10  -2    0.12    0.13
   4 -10  -2    0.20    0.17
  -4 -10   2    0.14    0.14
  -4 -10   2    0.14    0.17
   4 -10  -2    0.13    0.09
  -4 -10   2    0.12    0.08
   4 -10  -2   -0.09    0.10
   4 -10  -2   -0.04    0.16
  -4 -10   2    0.09    0.08
  -4 -10   2   -0.01    0.12
   4  10  -2   -0.10    0.08
   4  10  -2    0.12    0.12
  -4  10   2    0.16    0.08
   4  10  -2    0.14    0.08
  -4  10   2    0.10    0.12
  -4  10   2    0.06    0.14
   4  10  -2    0.12    0.14
  -2 -10   2    1.99    0.20
  -2 -10   2    2.25    0.17
   2 -10  -2    2.32    0.24
   2 -10  -2    2.26    0.19
  -2 -10   2    2.09    0.24
   2 -10  -2    2.35    0.17
   2 -10  -2    2.35    0.20
  -2 -10   2    1.96    0.24
   2 -10  -2    2.00    0.21
  -2 -10   2    2.10    0.13
   2  10  -2    2.07    0.18
   2  10  -2    2.00    0.15
  -2  10   2    2.56    0.25
  -2  10   2    2.37    0.19
   2  10  -2    2.19    0.20
  -2  10   2    2.64    0.20
   2  10  -2    2.40    0.20
   2  10  -2    2.42    0.23
  -2  10   2    2.59    0.22
   0 -10   2    1.43    0.18
   0 -10  -2    1.16    0.16
   0 -10   2    1.70    0.09
   0 -10   2    2.00    0.22
   0 -10  -2    1.67    0.14
   0 -10  -2    1.29    0.19
   0 -10  -2    1.82    0.20
   0  10   2    1.49    0.20
   0  10   2    1.27    0.16
   0  10   2    1.64    0.16
   0  10   2    1.32    0.16
   0  10  -2    1.22    0.18
   0  10  -2    1.94    0.19
   0  10  -2    1.41    0.17
   0  10  -2    1.41    0.15
   2 -10   2   64.87    2.89
   2 -10   2   62.17    2.89
   2 -10   2   64.32    2.85
  -2 -10  -2   65.22    2.90
  -2 -10  -2   66.79    2.87
  -2 -10  -2   65.66    2.87
  -2 -10  -2   66.26    2.89
  -2 -10  -2   67.99    2.90
   2 -10   2   66.27    2.88
   2 -10   2   65.13    2.84
   2  10   2   65.26    2.89
  -2  10  -2   63.99    2.88
   2  10   2   67.35    2.88
  -2  10  -2   64.97    2.90
   2  10   2   67.98    2.91
  -2  10  -2   66.15    2.88
   2  10   2   63.59    2.88
   4 -10   2    8.32    0.37
  -4 -10  -2    7.47    0.44
   4 -10   2    8.93    0.48
   4 -10   2    8.63    0.44
  -4 -10  -2    8.30    0.45
  -4 -10  -2    7.73    0.47
  -4 -10  -2    7.95    0.41
   4 -10   2    8.66    0.46
  -4 -10  -2    7.80    0.40
   4 -10   2    7.94    0.37
   4  10   2    7.73    0.44
  -4  10  -2    7.99    0.42
  -4  10  -2    8.71    0.42
  -4  10  -2    8.18    0.47
   4  10   2    8.07    0.41
   4  10   2    8.03    0.44
  -4  10  -2    7.80    0.46
   4  10   2    8.70    0.48
  -6 -10  -2    3.42    0.33
  -6 -10  -2    4.06    0.25
  -6 -10  -2    3.53    0.24
   6 -10   2    3.01    0.36
  -6 -10  -2    3.43    0.30
   6 -10   2    4.14    0.34
   6 -10   2    2.80    0.28
   6 -10   2    3.51    0.19
  -6 -10  -2    3.48    0.34
   6  10   2    3.40    0.23
  -6  10  -2    3.56    0.26
   6  10   2    3.37    0.35
   6  10   2    3.02    0.29
  -6  10  -2    3.64    0.33
  -6  10  -2    3.50    0.26
  -6  10  -2    3.94    0.33
   6  10   2    3.47    0.30
  -8 -10  -2    7.44    0.40
   8 -10   2    8.18    0.52
   8 -10   2    8.30    0.54
   8 -10   2    8.19    0.39
  -8 -10  -2    7.69    0.50
  -8 -10  -2    8.48    0.43
   8  10   2    7.81    0.49
  -8  10  -2    8.29    0.50
  -8  10  -2    7.01    0.50
  -8  10  -2    7.77    0.44
   8  10   2    8.47    0.54
   8  10   2    7.65    0.48
  -8  10  -2    8.20    0.44
 -10 -10  -2    1.05    0.34
 -10 -10  -2    0.76    0.34
  10 -10   2    1.36    0.41
 -10 -10  -2    0.88    0.13
  10 -10   2    0.99    0.32
  10 -10   2    1.09    0.16
 -10 -10  -2    0.86    0.15
 -10  10  -2    1.28    0.29
  10  10   2    0.99    0.30
  10  10   2    0.97    0.37
  10  10   2    1.14    0.32
 -10  10  -2    1.20    0.21
 -10  10  -2    0.54    0.26
  12 -10   2    4.08    0.33
 -12 -10  -2    3.28    0.38
  12 -10   2    4.11    0.64
 -12 -10  -2    3.80    0.26
 -12 -10  -2    3.71    0.23
 -12 -10  -2    2.80    0.40
 -12  10  -2    3.56    0.46
 -12  10  -2    3.38    0.44
 -12  10  -2    3.72    0.37
  12  10   2    3.26    0.46
  12  10   2    3.91    0.53
 -12  10  -2    3.44    0.36
 -14 -10  -2    3.77    0.23
 -14 -10  -2    4.47    0.47
 -14 -10  -2    3.96    0.22
  14 -10   2    3.47    0.46
 -14 -10  -2    3.11    0.49
 -14  10  -2    3.78    0.47
 -14  10  -2    4.92    0.55
  14  10   2    4.20    0.70
 -14  10  -2    3.88    0.46
 -14  10  -2    4.17    0.54
  14  10   2    4.80    0.56
 -15 -11   2    2.57    0.59
  15 -11  -2    3.23    0.68
 -15 -11   2    2.88    0.40
  15 -11  -2    3.07    0.65
 -15  11   2    4.38    0.54
  15  11  -2    3.31    0.61
  15  11  -2    4.04    0.49
 -15  11   2    2.43    0.39
  13 -11  -2    5.14    0.55
  13 -11  -2    6.32    0.65
  13 -11  -2    5.74    0.71
 -13 -11   2    5.19    0.43
 -13  11   2    4.64    0.56
  13  11  -2    5.93    0.48
 -13  11   2    6.34    0.46
  13  11  -2    5.58    0.57
  11 -11  -2    0.09    0.29
 -11 -11   2   -0.09    0.34
 -11 -11   2    0.25    0.33
  11 -11  -2   -0.03    0.25
  11 -11  -2    0.30    0.40
 -11 -11   2    0.17    0.20
  11 -11  -2    0.21    0.27
 -11  11   2    0.18    0.10
 -11  11   2    0.09    0.07
  11  11  -2    0.06    0.26
 -11  11   2    0.41    0.29
  11  11  -2    0.09    0.29
   9 -11  -2   15.18    0.73
  -9 -11   2   15.09    0.81
   9 -11  -2   14.12    0.79
  -9 -11   2   14.51    0.81
   9 -11  -2   15.76    0.73
   9 -11  -2   15.64    0.75
  -9 -11   2   15.13    0.72
   9 -11  -2   14.77    0.79
  -9  11   2   14.77    0.78
   9  11  -2   13.86    0.73
  -9  11   2   14.27    0.74
   9  11  -2   15.06    0.74
  -9  11   2   14.53    0.69
  -9  11   2   15.48    0.67
   9  11  -2   15.47    0.78
  -7 -11   2    2.04    0.26
   7 -11  -2    1.26    0.26
   7 -11  -2    1.72    0.25
  -7 -11   2    1.61    0.17
   7 -11  -2    1.34    0.22
   7 -11  -2    1.58    0.19
  -7 -11   2    1.61    0.27
   7 -11  -2    1.64    0.20
  -7 -11   2    1.50    0.13
  -7  11   2    1.32    0.15
   7  11  -2    1.45    0.19
   7  11  -2    1.53    0.23
  -7  11   2    2.06    0.22
  -7  11   2    1.59    0.23
   7  11  -2    1.30    0.13
   7  11  -2    1.94    0.19
   5 -11  -2    5.37    0.39
  -5 -11   2    5.50    0.39
   5 -11  -2    5.25    0.34
   5 -11  -2    5.51    0.31
   5 -11  -2    5.05    0.36
  -5 -11   2    5.36    0.29
  -5 -11   2    5.66    0.37
  -5 -11   2    5.28    0.28
  -5  11   2    5.55    0.29
  -5  11   2    5.56    0.34
   5  11  -2    5.46    0.28
   5  11  -2    5.36    0.36
   5  11  -2    5.48    0.33
  -5  11   2    5.28    0.36
   5  11  -2    5.68    0.30
   3 -11  -2    4.56    0.29
  -3 -11   2    4.60    0.32
  -3 -11   2    4.43    0.25
  -3 -11   2    3.90    0.29
   3 -11  -2    4.72    0.29
  -3 -11   2    4.30    0.23
   3 -11  -2    4.80    0.35
   3 -11  -2    5.07    0.27
   3 -11  -2    4.42    0.32
  -3 -11   2    4.69    0.35
  -3  11   2    4.55    0.32
   3  11  -2    4.91    0.30
   3  11  -2    5.27    0.31
   3  11  -2    4.22    0.32
  -3  11   2    4.38    0.37
  -3  11   2    4.45    0.29
   3  11  -2    4.22    0.25
   3  11  -2    4.67    0.27
  -3  11   2    4.36    0.26
  -1 -11   2    5.39    0.31
  -1 -11   2    4.50    0.33
  -1 -11   2    4.93    0.35
   1 -11  -2    4.95    0.27
   1 -11  -2    5.33    0.31
   1 -11  -2    5.00    0.32
   1 -11  -2    4.47    0.34
  -1 -11   2    4.92    0.24
   1 -11  -2    4.99    0.30
  -1 -11   2    5.04    0.28
   1  11  -2    5.21    0.30
  -1  11   2    4.58    0.30
   1  11  -2    5.03    0.31
   1  11  -2    4.71    0.35
  -1  11   2    4.55    0.36
   1  11  -2    4.87    0.25
  -1  11   2    4.79    0.28
   1  11  -2    4.85    0.27
  -1  11   2    4.37    0.33
  -1 -11  -2   14.13    0.70
   1 -11   2   13.50    0.60
  -1 -11  -2   13.84    0.65
  -1 -11  -2   14.60    0.68
   1 -11   2   13.02    0.65
   1 -11   2   14.61    0.67
  -1 -11  -2   13.36    0.64
  -1 -11  -2   13.32    0.66
   1 -11   2   13.53    0.61
   1 -11   2   13.86    0.68
  -1  11  -2   12.37    0.64
   1  11   2   14.40    0.66
  -1  11  -2   13.85    0.69
   1  11   2   13.35    0.66
  -1  11  -2   14.41    0.68
  -1  11  -2   13.90    0.66
   1  11   2   13.16    0.65
   1  11   2   13.58    0.69
   3 -11   2    4.97    0.39
  -3 -11  -2    5.39    0.33
   3 -11   2    5.64    0.25
  -3 -11  -2    5.28    0.36
  -3 -11  -2    4.86    0.35
   3 -11   2    5.58    0.34
  -3 -11  -2    5.62    0.39
   3 -11   2    5.41    0.25
  -3 -11  -2    5.71    0.30
   3 -11   2    5.60    0.37
  -3  11  -2    5.56    0.31
  -3  11  -2    6.11    0.33
   3  11   2    5.87    0.40
   3  11   2    5.46    0.34
  -3  11  -2    6.39    0.37
   3  11   2    5.29    0.32
   3  11   2    5.26    0.35
   5 -11   2   31.72    1.38
   5 -11   2   31.20    1.43
  -5 -11  -2   30.07    1.41
  -5 -11  -2   30.44    1.46
  -5 -11  -2   32.46    1.41
   5 -11   2   30.56    1.46
  -5 -11  -2   32.04    1.45
   5 -11   2   31.57    1.38
   5 -11   2   31.80    1.46
  -5 -11  -2   32.57    1.45
   5  11   2   34.49    1.56
   5  11   2   32.45    1.44
   5  11   2   31.57    1.42
  -5  11  -2   31.51    1.46
  -5  11  -2   29.66    1.45
   5  11   2   33.38    1.45
  -5  11  -2   31.42    1.43
  -5  11  -2   30.46    1.43
   7 -11   2   15.45    0.82
  -7 -11  -2   16.29    0.79
  -7 -11  -2   14.82    0.81
  -7 -11  -2   14.87    0.72
   7 -11   2   16.42    0.80
  -7 -11  -2   15.40    0.74
   7 -11   2   14.64    0.80
  -7 -11  -2   15.90    0.95
   7 -11   2   16.22    0.71
   7 -11   2   15.29    0.70
   7  11   2   14.48    0.82
  -7  11  -2   16.14    0.81
  -7  11  -2   15.75    0.76
  -7  11  -2   15.91    0.79
   7  11   2   15.39    0.78
  -7  11  -2   16.18    0.75
   7  11   2   14.47    0.77
  -9 -11  -2    0.10    0.35
  -9 -11  -2    0.05    0.14
   9 -11   2   -0.22    0.29
   9 -11   2   -0.02    0.30
   9 -11   2   -0.01    0.11
  -9 -11  -2    0.20    0.37
  -9 -11  -2   -0.05    0.34
  -9 -11  -2   -0.23    0.16
   9 -11   2    0.05    0.35
   9  11   2   -0.17    0.28
  -9  11  -2   -0.40    0.27
  -9  11  -2   -0.17    0.18
  -9  11  -2    0.01    0.27
   9  11   2   -0.29    0.33
   9  11   2   -0.05    0.34
  -9  11  -2    0.39    0.28
 -11 -11  -2   -0.37    0.21
  11 -11   2    0.21    0.55
  11 -11   2    0.01    0.17
  11 -11   2    0.30    0.38
 -11 -11  -2    0.00    0.12
 -11 -11  -2   -0.02    0.15
 -11 -11  -2    0.34    0.32
 -11  11  -2    0.12    0.31
 -11  11  -2   -0.04    0.21
  11  11   2    0.11    0.29
 -11  11  -2   -0.17    0.23
  11  11   2    0.41    0.46
 -11  11  -2   -0.25    0.33
 -13 -11  -2    0.41    0.11
 -13 -11  -2    0.37    0.14
 -13 -11  -2    0.82    0.29
 -13 -11  -2    0.53    0.42
  13 -11   2    0.27    0.26
 -13  11  -2    0.60    0.26
 -13  11  -2    0.47    0.39
  13  11   2    0.67    0.39
  13  11   2   -0.24    0.60
 -13  11  -2    0.49    0.44
 -13  11  -2    0.45    0.30
  14 -12  -2    4.21    0.57
 -14 -12   2    4.23    0.46
  14 -12  -2    4.38    0.56
  14 -12  -2    5.88    0.69
 -14  12   2    4.98    0.64
 -14  12   2    4.78    0.51
  14  12  -2    4.89    0.53
  14  12  -2    5.55    0.72
 -12 -12   2    2.79    0.31
  12 -12  -2    3.23    0.45
  12 -12  -2    2.60    0.51
  12 -12  -2    2.89    0.35
 -12  12   2    2.63    0.33
  12  12  -2    2.81    0.34
  12  12  -2    2.83    0.44
 -12  12   2    3.29    0.42
  10 -12  -2    4.68    0.41
 -10 -12   2    5.14    0.35
  10 -12  -2    4.79    0.38
 -10 -12   2    7.11    0.79
  10 -12  -2    5.20    0.56
 -10 -12   2    5.29    0.51
  10 -12  -2    5.25    0.47
  10  12  -2    5.22    0.39
 -10  12   2    5.06    0.27
  10  12  -2    5.24    0.49
 -10  12   2    4.86    0.31
  10  12  -2    5.42    0.43
 -10  12   2    4.91    0.46
 -10  12   2    4.73    0.38
  -8 -12   2    0.07    0.28
   8 -12  -2    0.33    0.17
  -8 -12   2    0.29    0.08
   8 -12  -2    0.22    0.24
  -8 -12   2    0.10    0.15
  -8 -12   2    0.37    0.30
   8 -12  -2    0.41    0.19
   8 -12  -2    0.30    0.31
   8 -12  -2    0.14    0.23
   8  12  -2    0.13    0.08
  -8  12   2    0.21    0.16
   8  12  -2    0.23    0.19
  -8  12   2    0.27    0.11
   8  12  -2    0.11    0.18
  -8  12   2    0.32    0.20
  -8  12   2    0.43    0.24
   8  12  -2    0.03    0.24
   6 -12  -2    4.36    0.32
  -6 -12   2    4.08    0.38
  -6 -12   2    3.21    0.39
   6 -12  -2    3.64    0.40
   6 -12  -2    4.66    0.37
   6 -12  -2    4.14    0.33
   6 -12  -2    3.74    0.28
  -6 -12   2    4.01    0.24
  -6 -12   2    4.31    0.26
   6  12  -2    4.32    0.29
   6  12  -2    3.87    0.36
  -6  12   2    4.17    0.25
  -6  12   2    4.34    0.35
   6  12  -2    4.74    0.32
  -6  12   2    4.36    0.31
   6  12  -2    4.08    0.25
  -4 -12   2   19.84    0.87
   4 -12  -2   19.07    0.89
   4 -12  -2   19.58    0.90
  -4 -12   2   19.21    0.92
   4 -12  -2   19.84    0.88
   4 -12  -2   19.21    0.93
  -4 -12   2   19.44    0.90
  -4 -12   2   19.66    0.94
   4 -12  -2   18.80    0.94
   4  12  -2   19.89    0.93
  -4  12   2   18.78    0.92
  -4  12   2   18.53    0.90
   4  12  -2   18.59    0.87
   4  12  -2   17.52    0.87
  -4  12   2   19.29    0.88
   4  12  -2   19.19    0.90
   2 -12  -2   14.89    0.75
  -2 -12   2   14.70    0.73
  -2 -12   2   15.54    0.77
   2 -12  -2   14.86    0.72
  -2 -12   2   15.03    0.70
   2 -12  -2   15.33    0.76
   2 -12  -2   15.58    0.70
  -2 -12   2   14.37    0.68
   2 -12  -2   15.02    0.72
  -2 -12   2   16.20    0.75
  -2  12   2   14.75    0.74
  -2  12   2   15.38    0.78
   2  12  -2   15.77    0.76
  -2  12   2   14.88    0.72
   2  12  -2   14.88    0.72
   2  12  -2   15.51    0.69
   2  12  -2   14.82    0.70
  -2  12   2   14.16    0.71
   2  12  -2   15.07    0.74
   0 -12   2    1.79    0.24
   0 -12  -2    1.84    0.25
   0 -12  -2    1.96    0.18
   0 -12   2    1.97    0.12
   0 -12  -2    1.64    0.22
   0 -12   2    2.25    0.21
   0 -12  -2    1.52    0.36
   0 -12   2    1.82    0.25
   0 -12  -2    2.54    0.32
   0  12  -2    1.81    0.24
   0  12   2    1.89    0.21
   0  12  -2    1.88    0.20
   0  12   2    2.19    0.22
   0  12  -2    2.32    0.23
   0  12   2    2.09    0.28
   0  12  -2    2.49    0.27
   0  12   2    1.80    0.22
  -2 -12  -2    2.91    0.28
  -2 -12  -2    3.34    0.46
   2 -12   2    3.33    0.29
  -2 -12  -2    2.62    0.24
  -2 -12  -2    2.60    0.30
   2 -12   2    2.75    0.25
   2 -12   2    2.95    0.32
   2 -12   2    2.69    0.15
   2 -12   2    2.67    0.14
  -2 -12  -2    2.83    0.21
  -2  12  -2    2.73    0.29
   2  12   2    2.63    0.36
   2  12   2    2.59    0.24
  -2  12  -2    2.71    0.25
   2  12   2    2.87    0.29
   2  12   2    2.47    0.25
  -2  12  -2    2.69    0.22
   4 -12   2    8.91    0.42
  -4 -12  -2    8.87    0.53
   4 -12   2    8.98    0.41
  -4 -12  -2    8.47    0.56
   4 -12   2   10.20    0.51
   4 -12   2    9.82    0.54
  -4 -12  -2    9.76    0.47
  -4 -12  -2   10.41    0.54
  -4 -12  -2    9.26    0.47
   4 -12   2    9.20    0.56
   4  12   2    8.66    0.57
  -4  12  -2    9.68    0.55
   4  12   2    9.33    0.51
  -4  12  -2    9.70    0.49
  -4  12  -2    8.67    0.53
   4  12   2    8.37    0.48
  -4  12  -2    9.85    0.49
   4  12   2    9.19    0.53
   6 -12   2    1.26    0.32
   6 -12   2    1.06    0.10
   6 -12   2    1.06    0.12
  -6 -12  -2    1.17    0.17
  -6 -12  -2    1.14    0.25
  -6 -12  -2    1.31    0.32
   6 -12   2    0.81    0.25
   6 -12   2    1.03    0.25
  -6 -12  -2    0.98    0.27
  -6  12  -2    1.40    0.20
   6  12   2    0.59    0.15
   6  12   2    1.01    0.25
   6  12   2    1.05    0.31
  -6  12  -2    0.80    0.19
  -6  12  -2    0.80    0.28
   6  12   2    1.33    0.22
  -6  12  -2    1.46    0.26
   8 -12   2    3.75    0.51
   8 -12   2    3.24    0.21
  -8 -12  -2    3.11    0.28
   8 -12   2    3.59    0.44
   8 -12   2    4.47    0.59
   8 -12   2    3.77    0.24
  -8 -12  -2    2.88    0.51
  -8 -12  -2    3.32    0.26
  -8 -12  -2    3.41    0.42
  -8  12  -2    3.46    0.44
   8  12   2    3.48    0.44
  -8  12  -2    3.57    0.31
   8  12   2    3.96    0.38
  -8  12  -2    3.37    0.35
   8  12   2    2.84    0.42
  -8  12  -2    3.37    0.41
  10 -12   2   -0.06    0.14
 -10 -12  -2    0.08    0.14
 -10 -12  -2   -0.02    0.32
  10 -12   2   -0.16    0.48
 -10 -12  -2    0.24    0.44
 -10 -12  -2   -0.07    0.15
 -10 -12  -2   -0.04    0.21
  10 -12   2   -0.18    0.35
 -10  12  -2    0.12    0.20
  10  12   2   -0.30    0.27
  10  12   2   -0.27    0.43
 -10  12  -2    0.05    0.23
 -10  12  -2   -0.13    0.33
 -10  12  -2   -0.08    0.33
  12 -12   2    0.82    0.47
 -12 -12  -2    0.73    0.14
  12 -12   2    0.64    0.23
 -12 -12  -2    0.89    0.15
 -12 -12  -2    0.58    0.28
 -12 -12  -2    1.05    0.40
 -12  12  -2    0.67    0.43
 -12  12  -2    0.74    0.26
  12  12   2    0.91    0.37
  12  12   2    1.01    0.60
 -12  12  -2    0.68    0.39
 -12  12  -2    1.03    0.31
  13 -13  -2    0.30    0.60
  13 -13  -2    0.34    0.44
 -13 -13   2    0.88    0.30
  13 -13  -2    0.49    0.38
  13  13  -2    0.25    0.50
 -13  13   2    0.26    0.32
 -13  13   2    0.39    0.44
  13  13  -2    0.25    0.34
  11 -13  -2    1.97    0.29
 -11 -13   2    3.04    0.34
  11 -13  -2    2.45    0.52
  11 -13  -2    2.95    0.42
  11 -13  -2    2.19    0.33
 -11  13   2    2.09    0.18
  11  13  -2    3.03    0.34
  11  13  -2    2.72    0.47
 -11  13   2    2.70    0.42
 -11  13   2    2.53    0.33
 -11  13   2    2.35    0.24
  11  13  -2    2.22    0.37
   9 -13  -2    2.13    0.25
   9 -13  -2    2.25    0.27
  -9 -13   2    1.52    0.21
  -9 -13   2    2.12    0.14
   9 -13  -2    2.61    0.41
  -9 -13   2    2.52    0.39
   9 -13  -2    1.70    0.33
  -9  13   2    2.12    0.28
   9  13  -2    2.27    0.29
  -9  13   2    1.78    0.33
   9  13  -2    2.00    0.27
   9  13  -2    1.37    0.33
  -9  13   2    2.04    0.20
  -9  13   2    1.98    0.27
   7 -13  -2    2.34    0.36
  -7 -13   2    3.25    0.40
   7 -13  -2    2.70    0.30
   7 -13  -2    2.18    0.31
  -7 -13   2    3.49    0.38
   7 -13  -2    2.83    0.25
  -7 -13   2    2.24    0.19
   7 -13  -2    2.49    0.31
  -7 -13   2    2.57    0.24
  -7  13   2    2.53    0.36
  -7  13   2    2.32    0.28
   7  13  -2    2.39    0.20
   7  13  -2    2.69    0.29
   7  13  -2    2.64    0.30
   7  13  -2    1.89    0.31
  -5 -13   2    3.25    0.23
   5 -13  -2    3.01    0.34
   5 -13  -2    3.36    0.26
  -5 -13   2    3.14    0.38
   5 -13  -2    3.45    0.31
   5 -13  -2    3.25    0.31
  -5 -13   2    2.74    0.30
  -5 -13   2    3.31    0.23
   5  13  -2    3.31    0.38
   5  13  -2    3.33    0.29
  -5  13   2    3.18    0.34
   5  13  -2    3.27    0.27
  -5  13   2    3.45    0.29
  -5  13   2    3.26    0.24
   5  13  -2    2.93    0.23
  -3 -13   2   36.49    1.67
   3 -13  -2   39.26    1.81
  -3 -13   2   35.41    1.68
   3 -13  -2   35.66    1.63
   3 -13  -2   36.68    1.65
   3 -13  -2   36.61    1.68
   3 -13  -2   35.95    1.64
  -3 -13   2   35.89    1.66
  -3 -13   2   37.18    1.61
  -3 -13   2   37.12    1.63
  -3  13   2   35.50    1.63
   3  13  -2   37.20    1.62
   3  13  -2   36.84    1.63
  -3  13   2   36.68    1.67
   3  13  -2   36.56    1.67
   3  13  -2   36.69    1.65
   3  13  -2   38.43    1.69
  -3  13   2   34.65    1.65
   1 -13  -2   11.98    0.70
  -1 -13   2   12.14    0.68
  -1 -13   2   12.55    0.58
   1 -13  -2   11.99    0.65
  -1 -13   2   13.95    0.63
  -1 -13   2   12.56    0.66
  -1 -13   2   13.50    0.70
   1 -13  -2   12.74    0.67
   1 -13  -2   13.16    0.61
   1 -13  -2   13.12    0.64
  -1  13   2   12.59    0.72
   1  13  -2   12.09    0.63
  -1  13   2   13.24    0.65
  -1  13   2   12.69    0.63
   1  13  -2   12.56    0.62
   1  13  -2   13.38    0.60
   1  13  -2   13.61    0.70
  -1  13   2   13.16    0.67
   1  13  -2   12.78    0.66
   1 -13   2   17.62    0.77
  -1 -13  -2   17.87    0.86
   1 -13   2   18.18    0.83
   1 -13   2   17.79    0.88
   1 -13   2   17.18    0.78
  -1 -13  -2   18.30    0.86
  -1 -13  -2   17.43    0.89
   1 -13   2   17.55    0.86
  -1 -13  -2   17.61    0.83
  -1 -13  -2   17.51    0.81
   1  13   2   17.43    0.83
   1  13   2   16.93    0.85
  -1  13  -2   16.86    0.83
  -1  13  -2   17.52    0.86
   1  13   2   17.22    0.89
   1  13   2   17.70    0.84
  -1  13  -2   17.00    0.82
   3 -13   2   18.61    0.82
  -3 -13  -2   18.84    0.87
  -3 -13  -2   17.65    0.86
  -3 -13  -2   19.01    0.92
   3 -13   2   18.35    0.82
   3 -13   2   18.05    0.92
   3 -13   2   19.64    0.94
  -3 -13  -2   18.08    0.94
  -3 -13  -2   18.71    0.96
   3 -13   2   19.56    0.90
   3  13   2   19.88    0.90
  -3  13  -2   18.21    0.88
  -3  13  -2   18.52    0.89
   3  13   2   18.95    0.88
  -3  13  -2   19.27    0.92
   3  13   2   18.64    0.91
   3  13   2   18.99    0.95
   5 -13   2   26.60    1.24
   5 -13   2   24.95    1.10
   5 -13   2   25.19    1.11
  -5 -13  -2   24.60    1.23
  -5 -13  -2   25.85    1.15
  -5 -13  -2   24.42    1.15
   5 -13   2   25.90    1.22
  -5 -13  -2   26.27    1.22
   5 -13   2   24.58    1.18
  -5 -13  -2   26.65    1.26
   5  13   2   24.68    1.16
  -5  13  -2   25.77    1.17
  -5  13  -2   24.77    1.21
   5  13   2   25.38    1.24
   5  13   2   24.13    1.18
   5  13   2   25.12    1.20
  -5  13  -2   25.95    1.17
  -5  13  -2   24.06    1.22
  -7 -13  -2   11.50    0.61
  -7 -13  -2   11.36    0.59
   7 -13   2   11.20    0.77
   7 -13   2   12.11    0.56
  -7 -13  -2   11.53    0.76
   7 -13   2   11.77    0.55
  -7 -13  -2   12.25    0.68
   7 -13   2   12.52    0.71
  -7  13  -2   12.42    0.72
  -7  13  -2   12.41    0.63
   7  13   2   12.21    0.67
   7  13   2   12.72    0.77
   7  13   2   12.18    0.70
  -7  13  -2   13.72    0.72
  -7  13  -2   12.39    0.63
  -9 -13  -2    0.52    0.34
  -9 -13  -2    0.54    0.22
   9 -13   2    0.31    0.15
  -9 -13  -2    0.15    0.17
   9 -13   2    0.43    0.13
  -9 -13  -2    0.22    0.47
   9 -13   2    0.34    0.49
   9  13   2    0.33    0.44
  -9  13  -2    0.56    0.22
   9  13   2    0.27    0.28
  -9  13  -2    0.23    0.33
  -9  13  -2    0.34    0.25
  -9  13  -2    0.40    0.35
 -11 -13  -2    2.24    0.25
 -11 -13  -2    2.16    0.31
 -11 -13  -2    2.24    0.23
  11 -13   2    2.89    0.53
 -11 -13  -2    2.10    0.43
 -11  13  -2    1.89    0.29
 -11  13  -2    1.02    0.44
 -11  13  -2    2.22    0.42
  11  13   2    1.91    0.39
  11  13   2    2.74    0.63
 -11  13  -2    2.62    0.34
  12 -14  -2    4.01    0.68
 -12 -14   2    2.91    0.36
  12 -14  -2    2.84    0.35
  12 -14  -2    3.84    0.52
 -12  14   2    3.76    0.48
  12  14  -2    4.00    0.50
 -12  14   2    4.11    0.63
  12  14  -2    3.13    0.56
  10 -14  -2    7.67    0.64
 -10 -14   2    8.28    0.51
  10 -14  -2    8.07    0.75
  10 -14  -2    8.32    0.57
  10 -14  -2    8.00    0.52
  10  14  -2    9.24    0.56
 -10  14   2    8.51    0.49
 -10  14   2    9.19    0.56
 -10  14   2    8.29    0.73
  10  14  -2    7.29    0.69
 -10  14   2    8.30    0.43
  10  14  -2    7.65    0.59
   8 -14  -2    5.38    0.60
   8 -14  -2    5.49    0.37
  -8 -14   2    5.05    0.36
  -8 -14   2    5.45    0.30
   8 -14  -2    4.95    0.43
   8 -14  -2    5.75    0.50
  -8  14   2    5.36    0.32
  -8  14   2    4.89    0.41
   8  14  -2    4.54    0.43
   8  14  -2    6.26    0.53
  -8  14   2    5.20    0.43
  -8  14   2    5.20    0.50
   8  14  -2    5.16    0.42
   8  14  -2    5.80    0.31
   6 -14  -2    0.22    0.28
  -6 -14   2    0.39    0.31
   6 -14  -2   -0.11    0.15
  -6 -14   2    0.19    0.34
  -6 -14   2    0.23    0.15
   6 -14  -2   -0.03    0.40
   6 -14  -2   -0.02    0.35
  -6 -14   2    0.21    0.15
   6 -14  -2    0.06    0.27
  -6 -14   2    0.43    0.24
  -6  14   2   -0.06    0.22
  -6  14   2   -0.06    0.14
   6  14  -2    0.18    0.29
   6  14  -2    0.18    0.20
   6  14  -2    0.17    0.14
   6  14  -2    0.27    0.33
  -6  14   2    0.13    0.27
   4 -14  -2    5.04    0.47
   4 -14  -2    4.42    0.36
   4 -14  -2    4.17    0.29
   4 -14  -2    3.72    0.37
  -4 -14   2    3.88    0.47
  -4 -14   2    4.05    0.26
  -4 -14   2    4.34    0.30
   4 -14  -2    3.60    0.40
  -4 -14   2    4.82    0.37
   4  14  -2    3.66    0.33
  -4  14   2    4.30    0.33
  -4  14   2    4.29    0.39
   4  14  -2    4.37    0.44
  -4  14   2    4.27    0.29
   4  14  -2    4.38    0.29
  -2 -14   2    2.47    0.31
  -2 -14   2    2.74    0.27
  -2 -14   2    2.80    0.34
   2 -14  -2    2.87    0.37
   2 -14  -2    2.45    0.34
  -2 -14   2    2.66    0.34
   2 -14  -2    2.66    0.22
   2 -14  -2    2.92    0.34
  -2 -14   2    2.48    0.18
   2 -14  -2    2.37    0.31
   2  14  -2    2.47    0.23
   2  14  -2    2.23    0.31
  -2  14   2    2.69    0.35
   2  14  -2    2.38    0.25
  -2  14   2    3.26    0.29
   2  14  -2    2.41    0.33
  -2  14   2    2.56    0.25
   2  14  -2    2.76    0.29
  -2  14   2    2.35    0.38
   0 -14  -2   22.67    1.18
   0 -14   2   24.58    1.11
   0 -14  -2   24.21    1.15
   0 -14  -2   24.55    1.09
   0 -14   2   24.98    1.14
   0 -14   2   23.94    1.17
   0 -14  -2   23.17    1.11
   0 -14  -2   24.95    1.14
   0 -14   2   24.09    1.06
   0  14  -2   21.24    1.11
   0  14  -2   24.55    1.18
   0  14   2   23.20    1.11
   0  14  -2   23.93    1.14
   0  14  -2   24.32    1.11
   0  14   2   24.11    1.13
   0  14   2   24.57    1.19
   0  14   2   24.94    1.12
  -2 -14  -2   18.92    0.93
   2 -14   2   19.63    0.89
  -2 -14  -2   19.84    0.99
   2 -14   2   19.78    1.02
  -2 -14  -2   19.32    1.02
   2 -14   2   19.66    0.88
   2 -14   2   22.26    1.00
  -2 -14  -2   19.93    0.94
   2 -14   2   20.23    0.97
  -2 -14  -2   20.72    1.00
  -2  14  -2   19.24    0.94
   2  14   2   20.80    0.96
   2  14   2   20.22    1.05
   2  14   2   21.12    0.95
  -2  14  -2   20.14    0.99
   2  14   2   19.90    0.98
  -2  14  -2   20.82    0.96
  -4 -14  -2   19.82    0.92
  -4 -14  -2   19.45    0.91
  -4 -14  -2   20.15    0.98
   4 -14   2   18.69    0.85
   4 -14   2   19.99    1.02
   4 -14   2   19.46    0.96
  -4 -14  -2   19.29    1.00
  -4 -14  -2   18.94    1.02
   4 -14   2   20.24    0.98
   4  14   2   20.06    0.95
   4  14   2   17.61    0.96
  -4  14  -2   20.11    0.94
  -4  14  -2   19.20    0.93
  -4  14  -2   20.97    0.98
   4  14   2   19.24    1.03
  -6 -14  -2   -0.25    0.38
   6 -14   2    0.06    0.07
   6 -14   2    0.23    0.43
   6 -14   2    0.05    0.30
  -6 -14  -2    0.10    0.18
  -6 -14  -2   -0.05    0.19
  -6 -14  -2    0.06    0.28
   6 -14   2    0.00    0.06
   6  14   2    0.22    0.34
  -6  14  -2   -0.11    0.21
   6  14   2    0.24    0.23
  -6  14  -2    0.28    0.20
   6  14   2    0.21    0.38
   6  14   2   -0.04    0.18
  -6  14  -2    0.03    0.30
  -6  14  -2    0.07    0.34
   8 -14   2    0.15    0.51
   8 -14   2    0.05    0.34
  -8 -14  -2   -0.16    0.19
   8 -14   2    0.00    0.11
   8 -14   2   -0.04    0.11
  -8 -14  -2   -0.11    0.47
  -8 -14  -2   -0.09    0.34
  -8 -14  -2   -0.12    0.19
   8  14   2    0.15    0.27
  -8  14  -2   -0.11    0.22
  -8  14  -2   -0.06    0.32
  -8  14  -2   -0.12    0.24
   8  14   2    0.06    0.50
  -8  14  -2    0.00    0.36
 -10 -14  -2    2.18    0.30
  10 -14   2    2.33    0.27
 -10 -14  -2    2.63    0.33
 -10 -14  -2    2.24    0.28
 -10 -14  -2    2.60    0.43
  10 -14   2    2.53    0.50
  10 -14   2    2.46    0.24
 -10  14  -2    2.55    0.45
 -10  14  -2    2.29    0.34
 -10  14  -2    2.77    0.47
  10  14   2    1.66    0.60
 -10  14  -2    2.30    0.30
  10  14   2    2.44    0.38
  11 -15  -2    0.50    0.29
  11 -15  -2    0.62    0.47
 -11 -15   2    0.20    0.27
  11 -15  -2   -0.26    0.65
  11 -15  -2    0.28    0.37
  11  15  -2    0.27    0.32
 -11  15   2   -0.20    0.34
 -11  15   2    0.21    0.16
 -11  15   2    0.10    0.23
  11  15  -2   -0.28    0.55
 -11  15   2    0.29    0.49
  -9 -15   2    0.41    0.13
   9 -15  -2    0.63    0.40
  -9 -15   2    0.33    0.22
  -9 -15   2    0.02    0.31
   9 -15  -2    0.52    0.31
   9 -15  -2    0.07    0.49
   9 -15  -2    0.46    0.22
  -9  15   2    0.27    0.38
   9  15  -2    0.39    0.27
   9  15  -2    1.04    0.45
   9  15  -2    0.49    0.33
  -9  15   2    0.58    0.28
   9  15  -2    0.27    0.12
  -9  15   2    0.59    0.17
  -9  15   2    0.18    0.28
  -7 -15   2    0.20    0.17
   7 -15  -2    0.19    0.19
  -7 -15   2    0.09    0.27
   7 -15  -2   -0.03    0.41
   7 -15  -2    0.04    0.31
   7 -15  -2    0.11    0.27
  -7 -15   2    0.27    0.18
   7  15  -2    0.59    0.26
   7  15  -2    0.45    0.41
  -7  15   2    0.12    0.32
  -7  15   2    0.45    0.17
  -7  15   2    0.29    0.25
   7  15  -2   -0.08    0.23
   7  15  -2    0.18    0.16
   5 -15  -2    2.48    0.29
   5 -15  -2    1.90    0.42
   5 -15  -2    2.42    0.34
  -5 -15   2    1.67    0.28
   5 -15  -2    1.85    0.20
  -5 -15   2    1.45    0.38
  -5 -15   2    1.91    0.22
  -5 -15   2    1.60    0.21
   5  15  -2    1.86    0.25
  -5  15   2    1.57    0.32
  -5  15   2    2.01    0.28
  -5  15   2    1.77    0.25
   5  15  -2    2.01    0.38
   5  15  -2    1.76    0.26
   5  15  -2    1.44    0.24
   3 -15  -2   19.14    0.89
   3 -15  -2   19.62    1.02
   3 -15  -2   19.30    0.97
   3 -15  -2   19.44    0.95
  -3 -15   2   18.70    1.00
   3 -15  -2   19.01    0.93
  -3 -15   2   18.39    0.87
  -3 -15   2   18.61    0.94
  -3 -15   2   19.49    0.90
  -3 -15   2   19.06    1.00
  -3  15   2   18.66    0.97
   3  15  -2   19.48    0.89
   3  15  -2   19.52    0.90
  -3  15   2   20.00    0.94
   3  15  -2   18.64    1.01
  -3  15   2   18.58    0.90
   3  15  -2   18.09    0.93
  -1 -15   2    0.39    0.26
   1 -15  -2    0.23    0.27
  -1 -15   2    0.11    0.23
   1 -15  -2    0.34    0.27
  -1 -15   2    0.07    0.31
   1 -15  -2    0.01    0.27
   1 -15  -2    0.10    0.36
   1 -15  -2    0.15    0.14
  -1 -15   2    0.31    0.10
   1  15  -2    0.34    0.25
   1  15  -2    0.38    0.18
  -1  15   2    0.23    0.18
   1  15  -2    0.11    0.35
  -1  15   2    0.19    0.37
   1  15  -2    0.02    0.20
  -1  15   2    0.24    0.21
  -1 -15  -2    0.67    0.27
   1 -15   2    0.52    0.11
   1 -15   2    0.11    0.28
   1 -15   2    0.29    0.35
   1 -15   2    0.41    0.08
  -1 -15  -2    0.92    0.37
  -1 -15  -2    0.24    0.24
   1 -15   2    0.11    0.25
  -1 -15  -2    0.45    0.16
   1  15   2    0.37    0.28
  -1  15  -2    0.33    0.19
  -1  15  -2    0.25    0.25
   1  15   2    0.30    0.21
   1  15   2    0.60    0.37
   1  15   2    0.67    0.22
  -1  15  -2    0.37    0.19
  -3 -15  -2    4.09    0.48
  -3 -15  -2    3.91    0.47
   3 -15   2    3.59    0.52
   3 -15   2    3.89    0.19
  -3 -15  -2    3.92    0.43
   3 -15   2    3.54    0.44
  -3 -15  -2    4.12    0.30
   3 -15   2    4.49    0.44
  -3 -15  -2    3.90    0.35
  -3  15  -2    3.68    0.32
   3  15   2    4.95    0.52
  -3  15  -2    4.05    0.34
   3  15   2    3.95    0.38
   3  15   2    4.36    0.35
   3  15   2    3.55    0.46
  -3  15  -2    3.86    0.42
   5 -15   2    2.70    0.47
   5 -15   2    3.65    0.46
  -5 -15  -2    2.67    0.47
  -5 -15  -2    2.54    0.32
  -5 -15  -2    3.16    0.45
  -5 -15  -2    2.80    0.28
   5  15   2    3.09    0.36
  -5  15  -2    3.05    0.34
   5  15   2    3.12    0.33
   5  15   2    3.45    0.40
  -5  15  -2    3.14    0.46
   5  15   2    2.85    0.48
  -5  15  -2    2.30    0.33
  -5  15  -2    2.60    0.36
   7 -15   2    5.06    0.57
   7 -15   2    4.69    0.23
  -7 -15  -2    4.33    0.38
  -7 -15  -2    5.42    0.71
   7 -15   2    6.80    0.89
  -7 -15  -2    5.42    0.54
  -7 -15  -2    4.73    0.38
  -7  15  -2    5.25    0.44
   7  15   2    4.28    0.58
   7  15   2    5.04    0.39
  -7  15  -2    4.68    0.53
   7  15   2    5.01    0.48
  -7  15  -2    5.22    0.42
  -7  15  -2    5.80    0.55
  -9 -15  -2   -0.10    0.22
  -9 -15  -2    0.39    0.26
   9 -15   2    0.12    0.12
   9 -15   2    0.26    0.48
   9 -15   2    0.19    0.12
  -9 -15  -2    0.25    0.41
  -9  15  -2    0.00    0.47
  -9  15  -2   -0.08    0.26
  -9  15  -2    0.47    0.42
   9  15   2    0.51    0.62
   9  15   2    0.01    0.34
  -9  15  -2    0.40    0.32
  10 -16  -2    0.48    0.27
 -10 -16   2    0.72    0.28
  10 -16  -2    0.94    0.38
  10 -16  -2    0.98    0.47
  10 -16  -2    0.58    0.69
 -10  16   2    0.86    0.37
  10  16  -2    0.97    0.56
  10  16  -2    1.08    0.35
 -10  16   2    1.01    0.31
 -10  16   2    1.16    0.50
 -10  16   2    1.23    0.23
   8 -16  -2    2.62    0.35
  -8 -16   2    2.91    0.28
   8 -16  -2    2.74    0.62
   8 -16  -2    2.91    0.45
  -8 -16   2    2.69    0.34
   8 -16  -2    2.91    0.37
   8  16  -2    2.43    0.34
  -8  16   2    3.44    0.39
   8  16  -2    2.94    0.56
  -8  16   2    2.84    0.45
  -8  16   2    3.16    0.39
  -8  16   2    3.02    0.30
  -6 -16   2    8.03    0.46
   6 -16  -2    7.34    0.76
   6 -16  -2    7.45    0.55
  -6 -16   2    7.73    0.45
  -6 -16   2    8.97    0.58
   6 -16  -2    7.66    0.46
   6 -16  -2    7.86    0.61
   6  16  -2    7.86    0.46
  -6  16   2    7.77    0.63
  -6  16   2    7.84    0.54
   6  16  -2    7.33    0.55
   6  16  -2    8.55    0.70
   6  16  -2    8.45    0.54
  -6  16   2    7.44    0.46
   4 -16  -2    1.52    0.20
   4 -16  -2    1.79    0.31
  -4 -16   2    1.85    0.25
  -4 -16   2    1.93    0.23
  -4 -16   2    1.53    0.30
   4 -16  -2    1.61    0.35
   4 -16  -2    2.41    0.47
  -4  16   2    2.41    0.37
   4  16  -2    2.20    0.27
  -4  16   2    1.88    0.29
  -4  16   2    1.88    0.24
   4  16  -2    1.25    0.44
   4  16  -2    1.52    0.23
   4  16  -2    2.26    0.30
   2 -16  -2    1.41    0.32
   2 -16  -2    1.20    0.43
   2 -16  -2    1.43    0.19
   2 -16  -2    1.12    0.33
  -2 -16   2    1.05    0.43
   2 -16  -2    1.94    0.33
  -2 -16   2    1.67    0.28
  -2 -16   2    1.27    0.31
  -2  16   2    0.99    0.30
   2  16  -2    1.33    0.41
   2  16  -2    1.29    0.26
  -2  16   2    1.66    0.48
  -2  16   2    1.36    0.23
   2  16  -2    0.94    0.29
   2  16  -2    0.86    0.22
  -2  16   2    1.48    0.33
   0 -16  -2    2.71    0.32
   0 -16  -2    2.98    0.41
   0 -16  -2    1.81    0.25
   0 -16  -2    2.14    0.36
   0 -16   2    2.73    0.18
   0 -16   2    2.71    0.45
   0 -16   2    2.96    0.35
   0 -16   2    2.94    0.33
   0 -16  -2    2.52    0.46
   0  16  -2    2.15    0.33
   0  16  -2    2.99    0.47
   0  16  -2    2.83    0.30
   0  16  -2    2.30    0.31
   0  16   2    2.05    0.26
   0  16   2    2.50    0.31
   0  16   2    2.53    0.49
  -2 -16  -2    1.02    0.19
  -2 -16  -2    0.51    0.36
  -2 -16  -2    1.50    0.45
   2 -16   2    1.29    0.33
   2 -16   2    1.16    0.14
   2 -16   2    0.93    0.10
   2 -16   2    0.68    0.41
  -2 -16  -2    0.94    0.27
  -2 -16  -2    1.05    0.32
   2 -16   2    0.68    0.31
  -2  16  -2    1.02    0.25
   2  16   2    0.91    0.36
   2  16   2    1.20    0.25
   2  16   2    0.54    0.48
  -2  16  -2    0.96    0.31
  -4 -16  -2    1.35    0.27
  -4 -16  -2    0.86    0.34
  -4 -16  -2    0.99    0.21
   4 -16   2    1.45    0.35
   4  16   2    1.52    0.50
  -4  16  -2    1.23    0.35
  -4  16  -2    0.58    0.26
   4  16   2    1.19    0.28
  -4  16  -2    1.01    0.25
   4  16   2    1.04    0.25
   4  16   2    1.12    0.39
  -6 -16  -2    0.30    0.26
  -6 -16  -2   -0.02    0.56
  -6 -16  -2    0.24    0.38
   6 -16   2    0.07    0.39
  -6 -16  -2    0.07    0.21
   6  16   2    0.01    0.23
  -6  16  -2   -0.22    0.48
  -6  16  -2    0.14    0.28
  -6  16  -2    0.00    0.37
   6  16   2    0.15    0.30
  -6  16  -2   -0.21    0.25
   6  16   2    0.30    0.55
  -8 -16  -2    0.11    0.43
  -8 -16  -2   -0.11    0.25
   8 -16   2   -0.08    0.44
  -8 -16  -2    0.12    0.25
   8  16   2    0.06    0.34
   8  16   2   -0.39    0.64
  -8  16  -2    0.04    0.50
  -8  16  -2    0.11    0.28
  -8  16  -2    0.24    0.44
  -8  16  -2   -0.41    0.30
   7 -17  -2    7.82    0.67
   7 -17  -2    7.33    0.59
  -7 -17   2    7.36    0.63
   7 -17  -2    7.26    0.47
   7 -17  -2    7.19    0.94
  -7 -17   2    7.72    0.47
  -7 -17   2    6.80    0.47
   7  17  -2    7.43    0.84
  -7  17   2    7.99    0.48
   7  17  -2    7.53    0.64
   7  17  -2    7.57    0.58
  -7  17   2    7.89    0.69
  -7  17   2    7.90    0.56
   7  17  -2    6.91    0.46
   5 -17  -2   -0.11    0.37
   5 -17  -2    0.02    0.18
  -5 -17   2   -0.25    0.26
  -5 -17   2   -0.08    0.34
   5 -17  -2   -0.33    0.59
   5 -17  -2    0.06    0.33
  -5 -17   2    0.10    0.19
   5  17  -2   -0.04    0.22
  -5  17   2    0.18    0.37
   5  17  -2    0.17    0.30
  -5  17   2   -0.18    0.29
   5  17  -2   -0.24    0.27
   5  17  -2    0.10    0.48
  -5  17   2    0.00    0.22
   3 -17  -2    1.89    0.22
   3 -17  -2    2.65    0.44
   3 -17  -2    1.65    0.53
  -3 -17   2    2.05    0.31
  -3 -17   2    2.02    0.23
  -3 -17   2    1.90    0.38
  -3  17   2    2.58    0.42
   3  17  -2    1.67    0.27
   3  17  -2    2.37    0.53
   3  17  -2    1.69    0.29
  -3  17   2    1.73    0.26
  -3  17   2    1.72    0.32
   3  17  -2    1.92    0.28
   1 -17  -2    3.68    0.57
  -1 -17   2    3.88    0.45
  -1 -17   2    3.59    0.48
  -1 -17   2    4.25    0.26
   1 -17  -2    3.88    0.52
   1 -17  -2    4.25    0.33
   1 -17  -2    3.56    0.46
   1  17  -2    4.02    0.49
  -1  17   2    4.94    0.66
   1  17  -2    5.28    0.58
  -1  17   2    4.30    0.40
   1  17  -2    4.00    0.38
   1  17  -2    3.62    0.41
  -1  17   2    4.77    0.43
  -1 -17  -2    0.09    0.32
  -1 -17  -2    0.01    0.33
   1 -17   2    0.17    0.33
   1 -17   2    0.11    0.13
  -1 -17  -2    0.14    0.18
   1 -17   2    0.28    0.09
  -1  17  -2    0.45    0.32
   1  17   2    0.12    0.38
   1  17   2    0.35    0.26
  -1  17  -2    0.03    0.26
  -1  17  -2    0.27    0.24
   1  17   2    0.42    0.56
   1  17   2    0.34    0.26
  -3 -17  -2   -0.12    0.58
   3 -17   2    0.04    0.36
  -3 -17  -2    0.28    0.21
  -3 -17  -2   -0.09    0.31
  -3 -17  -2    0.09    0.34
   3  17   2    0.21    0.27
  -3  17  -2    0.19    0.35
  -3  17  -2    0.23    0.27
   3  17   2   -0.36    0.55
  -3  17  -2   -0.17    0.29
   3  17   2   -0.02    0.28
   3  17   2    0.44    0.44
   5 -17   2    0.06    0.40
  -5 -17  -2   -0.20    0.30
  -5 -17  -2   -0.03    0.38
  -5 -17  -2    0.18    0.22
  -5  17  -2    0.21    0.55
   5  17   2    0.26    0.30
   5  17   2    0.19    0.28
   5  17   2    0.33    0.60
  -5  17  -2   -0.17    0.29
  -5  17  -2    0.28    0.39
   4 -18  -2    5.01    0.60
   4 -18  -2    5.58    0.39
   4 -18  -2    4.99    0.70
  -4 -18   2    5.96    0.38
  -4 -18   2    5.06    0.61
  -4 -18   2    5.66    0.52
   4 -18  -2    5.24    0.64
   4  18  -2    6.42    0.46
  -4  18   2    5.51    0.52
  -4  18   2    5.53    0.65
   4  18  -2    6.67    0.76
  -4  18   2    5.81    0.46
   4  18  -2    6.27    0.52
   4  18  -2    4.54    0.52
  -2 -18   2    7.37    0.42
   2 -18  -2    7.33    0.92
   2 -18  -2    8.38    0.66
  -2 -18   2    8.08    0.65
  -2 -18   2    7.73    0.60
   2 -18  -2    7.26    0.46
  -2  18   2    8.17    0.58
   2  18  -2    7.85    0.53
   2  18  -2    7.41    0.55
   0 -18   2    0.49    0.18
   0 -18  -2    0.69    0.21
   0 -18   2    0.36    0.38
   0 -18  -2    0.02    0.62
   0 -18  -2    0.42    0.41
   0 -18   2    0.61    0.13
   0  18  -2    0.18    0.37
   0  18   2    0.38    0.31
   0  18   2    0.30    0.29
   0  18   2    0.32    0.66
   0  18  -2    0.50    0.29
   0  18  -2    0.34    0.29
  -2 -18  -2    1.31    0.42
   2 -18   2    1.84    0.44
  -2 -18  -2    2.15    0.64
  -2 -18  -2    1.38    0.74
  -2 -18  -2    1.42    0.24
   2  18   2    1.79    0.50
   2  18   2    3.25    0.88
  -2  18  -2    1.76    0.33
  -2  18  -2    2.79    0.49
   2  18   2    1.80    0.33
  -2  18  -2    1.69    0.33
   2  18   2    1.57    0.32
  -4 -18  -2   10.10    0.59
  -4 -18  -2   10.37    0.81
  -4 -18  -2   10.14    0.69
   4 -18   2   11.02    0.82
  -4  18  -2    9.41    0.78
   4  18   2   10.63    0.70
  -4  18  -2   10.35    0.68
   4  18   2   10.69    1.09
  -4  18  -2   10.84    0.65
  18   0  -3   -0.03    0.25
  18   0  -3    0.01    0.22
 -18   0   3   -0.11    0.34
  18   0  -3    0.16    0.42
 -18   0   3   -0.07    0.29
 -18   0   3    0.21    0.65
 -18   0   3    0.09    0.20
  16   0  -3   -0.09    0.29
  16   0  -3    0.21    0.16
 -16   0   3   -0.05    0.22
 -16   0   3   -0.27    0.25
 -16   0   3    0.15    0.15
  16   0  -3   -0.20    0.18
 -16   0   3   -0.26    0.27
 -14   0   3    0.07    0.22
  14   0  -3    0.44    0.34
  14   0  -3    0.63    0.23
 -14   0   3    0.04    0.20
 -14   0   3    0.31    0.15
 -14   0   3    0.22    0.12
  14   0  -3    0.25    0.12
 -12   0   3   -0.10    0.09
 -12   0   3    0.14    0.11
  12   0  -3   -0.01    0.16
  12   0  -3    0.01    0.10
  12   0  -3   -0.08    0.16
 -12   0   3   -0.22    0.14
  12   0  -3   -0.02    0.09
 -10   0   3    0.12    0.08
  10   0  -3    0.18    0.12
  10   0  -3    0.38    0.12
 -10   0   3    0.27    0.12
  10   0  -3    0.18    0.07
  10   0  -3    0.25    0.07
 -10   0   3    0.14    0.08
 -10   0   3    0.15    0.11
  -8   0   3    0.03    0.09
  -8   0   3    0.10    0.06
   8   0  -3    0.09    0.08
   8   0  -3    0.13    0.10
  -8   0   3    0.18    0.06
   8   0  -3    0.10    0.05
  -8   0   3   -0.01    0.07
   8   0  -3    0.12    0.05
  -6   0   3    1.27    0.10
  -6   0   3    1.36    0.10
  -6   0   3    1.49    0.12
   6   0  -3    1.83    0.13
  -6   0   3    1.27    0.09
   6   0  -3    1.34    0.09
   6   0  -3    1.27    0.10
   6   0  -3    1.33    0.09
   4   0  -3    0.90    0.07
   4   0  -3    1.34    0.08
   4   0  -3    1.11    0.08
  -4   0   3    0.97    0.06
   4   0  -3    1.24    0.10
   2   0  -3    0.86    0.08
   2   0  -3    0.73    0.08
  -2   0   3    0.65    0.08
   0   0   3    0.03    0.03
   0   0  -3    0.06    0.03
   0   0   3    0.07    0.05
   0   0  -3    0.06    0.04
   0   0   3    0.10    0.04
   0   0  -3    0.07    0.06
  -2   0  -3    0.71    0.11
  -2   0  -3    0.89    0.07
   2   0   3    0.73    0.08
  -2   0  -3    0.80    0.09
   2   0   3    0.56    0.08
   2   0   3    0.81    0.10
  -2   0  -3    0.76    0.08
   4   0   3    3.69    0.22
  -4   0  -3    3.68    0.22
  -4   0  -3    3.77    0.19
  -4   0  -3    3.88    0.21
   4   0   3    3.20    0.21
   4   0   3    3.86    0.19
  -4   0  -3    3.23    0.19
  -6   0  -3    0.43    0.08
   6   0   3    0.42    0.10
   6   0   3    0.35    0.12
   6   0   3    0.44    0.12
   6   0   3    0.24    0.09
  -6   0  -3    0.17    0.08
  -6   0  -3    0.14    0.12
  -6   0  -3    0.34    0.11
  -8   0  -3   -0.09    0.09
   8   0   3   -0.10    0.13
   8   0   3   -0.08    0.15
  -8   0  -3   -0.06    0.14
  -8   0  -3    0.14    0.10
  -8   0  -3    0.00    0.16
   8   0   3    0.17    0.11
  10   0   3   -0.09    0.22
  10   0   3    0.02    0.16
 -10   0  -3   -0.11    0.12
 -10   0  -3   -0.13    0.18
 -10   0  -3    0.04    0.19
  10   0   3   -0.09    0.17
 -10   0  -3   -0.01    0.11
 -12   0  -3    0.04    0.17
 -12   0  -3   -0.05    0.25
  12   0   3    0.09    0.22
  12   0   3   -0.02    0.23
  12   0   3   -0.39    0.28
 -12   0  -3   -0.17    0.14
 -12   0  -3   -0.07    0.23
 -14   0  -3    0.00    0.18
  14   0   3    0.04    0.43
 -14   0  -3    0.02    0.34
 -14   0  -3    0.10    0.33
  14   0   3   -0.41    0.29
 -14   0  -3    0.10    0.23
  16   0   3    0.62    0.64
 -16   0  -3    0.49    0.50
 -16   0  -3    0.22    0.33
 -16   0  -3    0.05    0.24
  16   0   3   -0.04    0.40
  17  -1  -3    2.74    0.41
 -17  -1   3    3.10    0.37
  17  -1  -3    2.56    0.31
  17  -1  -3    2.77    0.33
 -17  -1   3    2.43    0.30
 -17  -1   3    2.82    0.25
  17   1  -3    2.21    0.26
  17   1  -3    2.67    0.40
 -17   1   3    3.21    0.38
 -17   1   3    2.95    0.29
 -17   1   3    2.79    0.33
  17   1  -3    1.88    0.27
 -17   1   3    1.74    0.37
 -15  -1   3    1.80    0.22
  15  -1  -3    1.28    0.27
 -15  -1   3    1.60    0.28
  15  -1  -3    1.80    0.23
 -15  -1   3    1.75    0.19
  15  -1  -3    1.62    0.29
  15  -1  -3    1.72    0.19
  15   1  -3    1.18    0.28
  15   1  -3    1.61    0.18
 -15   1   3    1.52    0.18
  15   1  -3    1.94    0.25
 -15   1   3    1.39    0.27
  15   1  -3    1.67    0.29
 -15   1   3    1.93    0.23
 -15   1   3    1.24    0.25
  13  -1  -3    8.54    0.47
  13  -1  -3    8.59    0.40
  13  -1  -3    8.43    0.41
 -13  -1   3    7.00    0.39
 -13  -1   3    7.74    0.50
 -13  -1   3    8.35    0.47
  13  -1  -3    8.48    0.47
 -13  -1   3    7.48    0.42
  13   1  -3    7.33    0.41
 -13   1   3    8.80    0.47
 -13   1   3    8.30    0.40
  13   1  -3    7.79    0.46
  13   1  -3    8.18    0.45
 -13   1   3    7.80    0.46
  13   1  -3    7.75    0.39
 -13   1   3    8.94    0.42
  11  -1  -3    0.27    0.14
 -11  -1   3    0.19    0.14
 -11  -1   3    0.16    0.14
 -11  -1   3    0.42    0.11
  11  -1  -3    0.17    0.14
  11  -1  -3    0.17    0.08
 -11  -1   3    0.18    0.08
  11  -1  -3    0.27    0.09
 -11   1   3    0.10    0.09
 -11   1   3    0.29    0.14
  11   1  -3    0.36    0.10
 -11   1   3    0.25    0.08
  11   1  -3    0.39    0.07
  11   1  -3    0.28    0.15
  11   1  -3    0.09    0.12
 -11   1   3    0.24    0.19
   9  -1  -3    1.74    0.16
  -9  -1   3    1.43    0.15
   9  -1  -3    2.08    0.12
   9  -1  -3    1.60    0.17
   9  -1  -3    1.79    0.13
  -9  -1   3    1.70    0.16
  -9  -1   3    1.64    0.14
  -9  -1   3    1.42    0.12
   9   1  -3    1.77    0.16
  -9   1   3    1.97    0.17
  -9   1   3    1.79    0.13
  -9   1   3    1.98    0.12
   9   1  -3    1.60    0.11
   9   1  -3    1.75    0.16
  -9   1   3    1.73    0.16
  -7  -1   3   12.63    0.57
   7  -1  -3   11.76    0.58
   7  -1  -3   12.70    0.57
   7  -1  -3   12.50    0.56
   7  -1  -3   12.39    0.59
  -7  -1   3   13.35    0.57
  -7  -1   3   12.50    0.59
  -7  -1   3   13.03    0.57
   7   1  -3   13.24    0.56
  -7   1   3   13.21    0.59
  -7   1   3   12.31    0.57
   7   1  -3   12.32    0.58
  -7   1   3   12.49    0.58
  -7   1   3   12.71    0.56
   7   1  -3   12.60    0.57
   7   1  -3   12.35    0.58
   5  -1  -3   39.95    1.72
   5  -1  -3   42.48    1.73
  -5  -1   3   37.35    1.74
  -5  -1   3   38.77    1.73
   5  -1  -3   42.22    1.74
  -5  -1   3   37.80    1.72
   5  -1  -3   39.92    1.73
   5   1  -3   38.02    1.73
   5   1  -3   39.51    1.73
   5   1  -3   38.50    1.74
  -5   1   3   41.51    1.74
  -5   1   3   40.03    1.73
   5   1  -3   37.96    1.73
  -5   1   3   39.96    1.73
   3  -1  -3  212.92    8.35
   3  -1  -3  190.88    8.35
  -3  -1   3  179.19    8.36
  -3   1   3  212.07    8.36
   3   1  -3  183.03    8.34
   3   1  -3  176.99    8.36
  -1  -1   3  113.37    4.87
   1  -1  -3  111.32    4.86
   1  -1  -3  110.71    4.86
   1   1  -3  106.67    4.86
   1   1  -3  120.36    4.85
  -1   1   3  110.93    4.86
   1   1  -3  113.23    4.87
  -1   1   3  109.77    4.86
  -1   1   3  109.95    4.85
   1  -1   3   14.03    0.61
  -1  -1  -3   13.32    0.61
   1  -1   3   13.39    0.62
  -1  -1  -3   13.92    0.62
  -1  -1  -3   13.57    0.61
   1  -1   3   13.89    0.61
   1   1   3   13.99    0.61
  -1   1  -3   13.68    0.61
   1   1   3   13.69    0.61
  -1   1  -3   13.73    0.61
  -1   1  -3   13.39    0.61
  -1   1  -3   13.67    0.63
   1   1   3   13.64    0.62
   3  -1   3   58.15    2.52
  -3  -1  -3   55.15    2.53
   3  -1   3   56.85    2.52
  -3  -1  -3   56.85    2.52
  -3  -1  -3   56.52    2.52
   3  -1   3   59.04    2.51
   3  -1   3   58.98    2.53
  -3  -1  -3   58.74    2.51
   3   1   3   57.18    2.52
  -3   1  -3   57.46    2.52
  -3   1  -3   60.12    2.53
  -3   1  -3   57.32    2.52
  -3   1  -3   58.41    2.51
   3   1   3   55.40    2.53
   3   1   3   57.99    2.52
   5  -1   3    5.28    0.29
  -5  -1  -3    4.86    0.30
  -5  -1  -3    5.57    0.28
  -5  -1  -3    5.46    0.27
  -5  -1  -3    5.70    0.30
   5  -1   3    5.25    0.29
   5  -1   3    5.16    0.27
   5  -1   3    6.11    0.31
   5   1   3    5.84    0.28
  -5   1  -3    5.74    0.27
   5   1   3    5.65    0.30
  -5   1  -3    5.59    0.28
  -5   1  -3    5.11    0.29
  -5   1  -3    6.25    0.31
   7  -1   3  123.47    5.20
   7  -1   3  116.87    5.21
  -7  -1  -3  121.16    5.22
  -7  -1  -3  120.52    5.20
   7  -1   3  115.25    5.22
  -7  -1  -3  120.73    5.22
   7  -1   3  118.85    5.22
   7   1   3  119.85    5.21
  -7   1  -3  120.29    5.23
  -7   1  -3  118.52    5.20
  -7   1  -3  118.37    5.22
   7   1   3  122.31    5.22
  -7   1  -3  119.68    5.20
   7   1   3  115.79    5.22
  -9  -1  -3   10.03    0.44
  -9  -1  -3    8.57    0.44
   9  -1   3    8.65    0.45
   9  -1   3    8.43    0.48
  -9  -1  -3   10.15    0.49
  -9  -1  -3    8.92    0.48
   9  -1   3    8.96    0.49
   9  -1   3    8.82    0.46
   9   1   3    8.86    0.50
   9   1   3    8.73    0.45
  -9   1  -3    8.57    0.48
   9   1   3    8.25    0.48
  -9   1  -3    8.84    0.48
  -9   1  -3    9.33    0.45
  -9   1  -3    8.11    0.43
 -11  -1  -3    0.31    0.20
  11  -1   3    0.51    0.25
  11  -1   3    0.49    0.20
  11  -1   3    0.48    0.19
 -11  -1  -3    0.20    0.16
 -11  -1  -3    0.33    0.22
  11  -1   3    0.46    0.20
 -11  -1  -3    0.35    0.13
  11   1   3    0.60    0.22
  11   1   3    0.36    0.27
 -11   1  -3    0.33    0.15
 -11   1  -3    0.41    0.21
  11   1   3    0.22    0.19
 -11   1  -3    0.58    0.14
 -11   1  -3    0.24    0.23
 -13  -1  -3    5.01    0.33
  13  -1   3    4.77    0.44
  13  -1   3    5.26    0.42
  13  -1   3    5.01    0.53
 -13  -1  -3    5.20    0.47
  13  -1   3    5.25    0.45
 -13  -1  -3    4.89    0.38
 -13   1  -3    4.91    0.33
 -13   1  -3    5.14    0.45
  13   1   3    5.18    0.42
 -13   1  -3    5.00    0.37
 -13   1  -3    4.64    0.47
  13   1   3    5.36    0.53
  13   1   3    5.51    0.46
 -15  -1  -3   11.66    0.60
 -15  -1  -3   11.58    0.66
 -15  -1  -3   11.25    0.76
  15  -1   3   10.47    0.79
  15  -1   3   11.92    0.97
  15   1   3   11.68    0.74
 -15   1  -3   11.65    0.61
 -15   1  -3   12.06    0.68
 -15   1  -3   11.02    0.78
 -15   1  -3   10.43    0.76
 -18  -2   3    0.19    0.40
  18  -2  -3    0.38    0.45
 -18  -2   3    0.34    0.35
  18  -2  -3   -0.04    0.28
 -18  -2   3    0.27    0.13
 -18  -2   3   -0.18    0.33
 -18   2   3    0.07    0.34
  18   2  -3    0.36    0.45
 -18   2   3    0.29    0.24
  18   2  -3    0.09    0.29
 -18   2   3    0.28    0.23
 -16  -2   3    1.01    0.29
  16  -2  -3    0.20    0.31
  16  -2  -3    0.14    0.20
 -16  -2   3    0.36    0.32
 -16  -2   3    0.48    0.12
 -16  -2   3    0.22    0.24
  16  -2  -3    0.24    0.17
 -16   2   3    0.38    0.17
  16   2  -3    0.31    0.13
  16   2  -3    0.46    0.31
  16   2  -3    0.52    0.22
 -16   2   3    0.17    0.18
 -16   2   3    0.40    0.26
  14  -2  -3    5.80    0.42
 -14  -2   3    5.74    0.38
  14  -2  -3    6.03    0.34
 -14  -2   3    5.52    0.41
 -14  -2   3    5.44    0.40
  14  -2  -3    6.30    0.33
 -14  -2   3    5.63    0.29
 -14   2   3    6.35    0.35
  14   2  -3    5.79    0.35
 -14   2   3    5.61    0.41
 -14   2   3    6.33    0.32
  14   2  -3    5.80    0.29
  14   2  -3    5.66    0.41
  14   2  -3    4.92    0.42
 -12  -2   3   33.62    1.56
 -12  -2   3   35.08    1.54
  12  -2  -3   33.90    1.52
  12  -2  -3   32.78    1.56
 -12  -2   3   34.89    1.52
 -12  -2   3   35.87    1.55
  12  -2  -3   35.86    1.56
  12  -2  -3   35.01    1.53
 -12   2   3   33.84    1.54
 -12   2   3   35.09    1.57
  12   2  -3   35.28    1.54
  12   2  -3   34.28    1.55
 -12   2   3   35.34    1.56
  12   2  -3   34.43    1.51
  12   2  -3   32.93    1.55
 -12   2   3   34.29    1.52
  10  -2  -3  133.83    5.71
  10  -2  -3  133.86    5.73
  10  -2  -3  131.15    5.70
  10  -2  -3  135.12    5.73
 -10  -2   3  129.59    5.73
 -10  -2   3  130.99    5.72
 -10  -2   3  128.46    5.72
 -10  -2   3  130.81    5.70
  10   2  -3  130.78    5.73
 -10   2   3  127.59    5.74
 -10   2   3  133.15    5.70
  10   2  -3  129.40    5.73
  10   2  -3  129.59    5.70
 -10   2   3  134.27    5.72
 -10   2   3  135.03    5.73
  10   2  -3  127.33    5.72
   8  -2  -3   24.00    1.11
   8  -2  -3   25.31    1.09
  -8  -2   3   25.00    1.10
  -8  -2   3   24.92    1.10
  -8  -2   3   25.17    1.11
   8  -2  -3   24.02    1.10
   8  -2  -3   24.12    1.08
  -8  -2   3   24.81    1.08
   8   2  -3   25.66    1.09
   8   2  -3   24.37    1.10
  -8   2   3   23.75    1.10
   8   2  -3   23.99    1.10
  -8   2   3   23.17    1.10
  -8   2   3   25.66    1.11
   8   2  -3   25.58    1.08
   6  -2  -3    8.48    0.42
  -6  -2   3    9.26    0.40
   6  -2  -3    8.06    0.41
   6  -2  -3    8.26    0.38
  -6  -2   3   10.02    0.41
  -6  -2   3    9.12    0.42
   6  -2  -3    8.12    0.40
  -6   2   3    7.84    0.42
   6   2  -3    9.37    0.41
  -6   2   3    8.11    0.40
   6   2  -3    9.71    0.41
  -6   2   3    8.14    0.41
   6   2  -3    9.12    0.40
   6   2  -3    9.05    0.39
  -4  -2   3   35.82    1.47
   4  -2  -3   33.71    1.47
   4  -2  -3   33.24    1.48
   4  -2  -3   32.58    1.47
   4  -2  -3   31.99    1.46
  -4  -2   3   33.54    1.46
  -4  -2   3   34.76    1.46
   4   2  -3   34.36    1.47
   4   2  -3   32.69    1.46
  -4   2   3   32.00    1.46
  -4   2   3   32.21    1.47
   4   2  -3   33.11    1.47
   4   2  -3   35.08    1.47
   2  -2  -3  344.68   16.83
   2  -2  -3  398.49   16.83
   2  -2  -3  434.68   16.84
  -2   2   3  343.32   16.83
   2   2  -3  443.49   16.83
   2   2  -3  425.34   16.84
   2   2  -3  328.10   16.82
   0  -2  -3   15.55    0.68
   0  -2  -3   15.20    0.68
   0  -2  -3   15.55    0.69
   0  -2  -3   15.72    0.68
   0  -2   3   15.74    0.69
   0  -2   3   15.67    0.67
   0  -2   3   15.48    0.68
   0   2   3   14.72    0.68
   0   2  -3   15.22    0.67
   0   2  -3   15.94    0.69
   0   2   3   14.66    0.68
   0   2   3   14.48    0.68
   0   2  -3   14.85    0.67
   0   2  -3   15.50    0.68
   0   2   3   14.49    0.68
   2  -2   3   13.67    0.61
  -2  -2  -3   14.32    0.63
   2  -2   3   13.72    0.64
  -2  -2  -3   13.03    0.63
  -2  -2  -3   14.26    0.62
   2  -2   3   13.69    0.63
   2  -2   3   14.03    0.62
  -2  -2  -3   13.39    0.63
   2   2   3   13.63    0.62
   2   2   3   13.45    0.63
  -2   2  -3   14.00    0.61
  -2   2  -3   14.00    0.64
   2   2   3   14.34    0.63
  -2   2  -3   13.44    0.62
  -2   2  -3   13.99    0.62
  -4  -2  -3    6.08    0.30
  -4  -2  -3    4.75    0.28
   4  -2   3    5.38    0.29
   4  -2   3    5.44    0.30
   4  -2   3    5.67    0.29
  -4  -2  -3    6.03    0.30
  -4  -2  -3    6.02    0.28
   4  -2   3    6.26    0.27
  -4   2  -3    5.13    0.30
   4   2   3    6.04    0.28
  -4   2  -3    5.63    0.28
  -4   2  -3    5.88    0.27
   4   2   3    6.28    0.30
  -4   2  -3    4.71    0.29
   4   2   3    5.90    0.30
  -6  -2  -3    5.62    0.35
   6  -2   3    6.28    0.34
   6  -2   3    6.61    0.33
   6  -2   3    6.15    0.34
  -6  -2  -3    5.97    0.33
  -6  -2  -3    6.36    0.31
  -6  -2  -3    6.41    0.31
   6  -2   3    6.15    0.31
  -6   2  -3    7.19    0.35
  -6   2  -3    5.99    0.30
   6   2   3    6.73    0.34
  -6   2  -3    6.04    0.34
   6   2   3    5.10    0.34
  -6   2  -3    6.17    0.31
   6   2   3    6.21    0.32
   8  -2   3   14.65    0.68
  -8  -2  -3   13.56    0.68
   8  -2   3   13.78    0.66
  -8  -2  -3   14.65    0.64
   8  -2   3   12.56    0.66
  -8  -2  -3   13.86    0.65
  -8  -2  -3   14.67    0.68
  -8   2  -3   14.50    0.69
   8   2   3   13.48    0.68
   8   2   3   14.06    0.66
   8   2   3   14.06    0.68
  -8   2  -3   14.25    0.65
  -8   2  -3   13.64    0.65
  -8   2  -3   13.74    0.68
 -10  -2  -3    1.63    0.17
  10  -2   3    2.50    0.26
 -10  -2  -3    1.66    0.21
  10  -2   3    1.84    0.23
 -10  -2  -3    2.02    0.23
  10  -2   3    1.89    0.22
  10  -2   3    2.34    0.27
 -10  -2  -3    1.78    0.25
 -10   2  -3    1.66    0.20
 -10   2  -3    1.94    0.27
  10   2   3    2.40    0.28
 -10   2  -3    2.11    0.25
  10   2   3    1.70    0.21
  10   2   3    2.36    0.28
 -10   2  -3    1.82    0.20
  12  -2   3    0.74    0.21
  12  -2   3    1.31    0.26
  12  -2   3    0.94    0.32
 -12  -2  -3    0.97    0.20
 -12  -2  -3    0.71    0.15
 -12  -2  -3    0.34    0.25
 -12  -2  -3    0.74    0.27
  12  -2   3    0.59    0.23
 -12   2  -3    0.62    0.25
 -12   2  -3    1.02    0.20
  12   2   3    0.79    0.31
 -12   2  -3    0.76    0.17
  12   2   3    1.20    0.25
  12   2   3    0.90    0.25
 -12   2  -3    0.57    0.27
 -14  -2  -3   10.25    0.53
  14  -2   3   10.59    0.66
  14  -2   3   10.48    0.76
  14  -2   3    9.33    0.69
 -14  -2  -3   10.68    0.69
 -14  -2  -3    9.68    0.59
 -14  -2  -3    9.91    0.69
  14  -2   3   10.12    0.63
  14   2   3    9.02    0.87
 -14   2  -3   11.43    0.71
 -14   2  -3    9.86    0.63
  14   2   3   10.77    0.77
 -14   2  -3   11.27    0.56
 -16  -2  -3    6.02    0.44
  16  -2   3    5.72    0.82
 -16  -2  -3    6.98    0.57
 -16  -2  -3    6.75    0.74
  16  -2   3    6.02    0.63
 -16   2  -3    6.82    0.56
  16   2   3    7.76    0.66
 -16   2  -3    6.90    0.75
  16   2   3    6.87    0.92
 -16   2  -3    6.91    0.48
 -17  -3   3    6.70    0.51
  17  -3  -3    6.10    0.39
 -17  -3   3    5.84    0.56
 -17  -3   3    6.15    0.53
  17  -3  -3    6.03    0.47
  17  -3  -3    6.91    0.63
 -17   3   3    6.59    0.42
  17   3  -3    6.73    0.59
  17   3  -3    5.94    0.47
 -17   3   3    5.84    0.52
 -17   3   3    6.22    0.37
 -15  -3   3    3.33    0.38
  15  -3  -3    3.93    0.43
  15  -3  -3    3.44    0.31
 -15  -3   3    3.51    0.18
  15  -3  -3    3.48    0.41
  15  -3  -3    2.94    0.25
 -15  -3   3    4.14    0.36
 -15  -3   3    4.06    0.49
 -15   3   3    3.17    0.38
 -15   3   3    3.48    0.23
  15   3  -3    3.50    0.31
 -15   3   3    3.29    0.29
  15   3  -3    4.05    0.40
  15   3  -3    3.66    0.39
  13  -3  -3    2.45    0.30
 -13  -3   3    2.08    0.24
  13  -3  -3    2.21    0.27
 -13  -3   3    2.43    0.27
  13  -3  -3    2.45    0.23
  13  -3  -3    2.63    0.18
 -13  -3   3    2.25    0.27
 -13  -3   3    2.30    0.13
 -13   3   3    2.54    0.27
  13   3  -3    2.98    0.28
 -13   3   3    2.60    0.16
  13   3  -3    2.54    0.23
 -13   3   3    2.33    0.22
  11  -3  -3    3.36    0.27
 -11  -3   3    3.25    0.24
 -11  -3   3    3.70    0.25
  11  -3  -3    3.00    0.26
  11  -3  -3    3.20    0.18
 -11  -3   3    4.28    0.27
  11  -3  -3    3.64    0.22
 -11  -3   3    3.69    0.16
  11   3  -3    3.54    0.23
 -11   3   3    2.95    0.22
 -11   3   3    3.30    0.32
 -11   3   3    2.68    0.25
  11   3  -3    2.97    0.25
 -11   3   3    3.18    0.17
  11   3  -3    3.49    0.16
  11   3  -3    3.48    0.25
   9  -3  -3    1.29    0.17
   9  -3  -3    0.96    0.13
  -9  -3   3    1.17    0.15
  -9  -3   3    0.96    0.14
   9  -3  -3    0.90    0.14
  -9  -3   3    1.18    0.14
   9   3  -3    1.37    0.15
   9   3  -3    1.30    0.08
   9   3  -3    1.41    0.14
  -9   3   3    0.89    0.14
  -9   3   3    1.12    0.16
  -9   3   3    1.44    0.14
   9   3  -3    1.44    0.15
  -7  -3   3    0.65    0.10
   7  -3  -3    0.68    0.10
  -7  -3   3    0.74    0.09
  -7  -3   3    0.53    0.09
   7  -3  -3    0.62    0.12
   7  -3  -3    0.58    0.09
   7   3  -3    0.61    0.05
   7   3  -3    0.50    0.08
  -7   3   3    0.64    0.12
  -7   3   3    0.47    0.09
   7   3  -3    0.65    0.10
   7   3  -3    0.78    0.10
  -5  -3   3   29.74    1.26
  -5  -3   3   28.66    1.24
  -5  -3   3   28.07    1.25
   5  -3  -3   28.37    1.25
   5  -3  -3   28.49    1.25
   5  -3  -3   29.14    1.26
  -5  -3   3   27.86    1.24
   5   3  -3   27.98    1.24
  -5   3   3   29.33    1.25
   5   3  -3   28.47    1.24
  -5   3   3   27.22    1.25
   5   3  -3   27.37    1.24
   5   3  -3   27.59    1.25
   5   3  -3   28.19    1.25
   3  -3  -3  564.45   23.33
   3  -3  -3  549.09   23.33
  -3  -3   3  490.32   23.32
   3   3  -3  560.20   23.32
   3   3  -3  588.25   23.32
   3   3  -3  549.71   23.33
   3   3  -3  462.37   23.32
  -3   3   3  539.87   23.32
  -1  -3   3   50.41    2.20
   1  -3  -3   51.16    2.21
  -1  -3   3   50.30    2.20
   1  -3  -3   51.67    2.21
  -1  -3   3   50.31    2.21
   1  -3  -3   52.15    2.21
   1  -3  -3   52.58    2.22
   1  -3  -3   49.00    2.22
   1   3  -3   49.85    2.20
  -1   3   3   48.73    2.22
  -1   3   3   49.99    2.21
  -1   3   3   52.59    2.21
   1   3  -3   49.16    2.21
   1   3  -3   50.62    2.21
  -1   3   3   51.80    2.22
   1   3  -3   49.97    2.21
  -1  -3  -3  167.89    7.40
   1  -3   3  168.11    7.39
  -1  -3  -3  175.41    7.40
  -1   3  -3  166.67    7.41
   1   3   3  170.41    7.40
   1   3   3  172.55    7.40
  -1   3  -3  170.93    7.40
  -3  -3  -3    5.25    0.27
  -3  -3  -3    5.22    0.28
   3  -3   3    5.50    0.27
   3  -3   3    5.19    0.25
  -3  -3  -3    4.84    0.26
  -3  -3  -3    5.49    0.27
   3  -3   3    5.80    0.27
   3  -3   3    5.29    0.29
  -3   3  -3    4.99    0.29
  -3   3  -3    5.04    0.25
   3   3   3    5.24    0.28
   3   3   3    5.67    0.28
  -3   3  -3    5.25    0.26
   3   3   3    5.38    0.27
  -3   3  -3    5.69    0.28
  -5  -3  -3  149.10    6.48
  -5  -3  -3  145.04    6.49
   5  -3   3  150.61    6.50
  -5  -3  -3  145.67    6.49
   5  -3   3  148.97    6.47
   5  -3   3  146.46    6.49
  -5  -3  -3  141.53    6.48
  -5  -3  -3  151.23    6.49
   5  -3   3  151.12    6.49
   5   3   3  150.10    6.49
  -5   3  -3  156.07    6.50
   5   3   3  147.86    6.50
  -5   3  -3  147.89    6.48
  -5   3  -3  152.37    6.50
  -5   3  -3  148.14    6.47
   5   3   3  152.32    6.49
   7  -3   3   45.47    2.01
   7  -3   3   45.94    1.98
  -7  -3  -3   47.61    2.01
  -7  -3  -3   43.52    1.99
  -7  -3  -3   44.86    1.99
   7  -3   3   45.71    2.00
  -7  -3  -3   46.00    2.01
   7  -3   3   43.52    2.01
  -7   3  -3   46.82    1.99
  -7   3  -3   45.42    1.99
   7   3   3   43.64    2.01
  -7   3  -3   43.43    2.02
   7   3   3   46.27    2.00
   7   3   3   46.10    2.01
  -7   3  -3   43.09    2.01
   9  -3   3    2.45    0.20
  -9  -3  -3    2.54    0.18
   9  -3   3    2.68    0.27
   9  -3   3    2.42    0.23
   9  -3   3    2.18    0.29
  -9  -3  -3    2.67    0.26
  -9  -3  -3    2.30    0.26
  -9  -3  -3    2.42    0.21
   9   3   3    2.48    0.28
  -9   3  -3    2.27    0.26
   9   3   3    2.14    0.24
  -9   3  -3    2.29    0.20
   9   3   3    2.59    0.26
  -9   3  -3    2.67    0.28
  -9   3  -3    2.70    0.20
  11  -3   3   20.56    1.00
 -11  -3  -3   19.76    0.99
  11  -3   3   20.12    1.03
  11  -3   3   22.04    1.02
  11  -3   3   21.50    0.98
 -11  -3  -3   20.55    1.03
 -11  -3  -3   20.41    1.02
 -11  -3  -3   20.85    0.96
  11   3   3   21.86    1.00
  11   3   3   21.07    1.03
 -11   3  -3   22.42    0.98
  11   3   3   23.57    1.05
 -11   3  -3   20.25    1.01
 -11   3  -3   21.81    1.03
 -11   3  -3   21.46    0.99
 -13  -3  -3    3.27    0.26
 -13  -3  -3    3.21    0.44
  13  -3   3    3.69    0.47
  13  -3   3    2.97    0.34
  13  -3   3    3.28    0.37
 -13  -3  -3    2.97    0.34
 -13  -3  -3    3.32    0.39
 -13   3  -3    2.97    0.33
  13   3   3    3.66    0.42
 -13   3  -3    3.07    0.43
 -13   3  -3    3.03    0.35
  13   3   3    2.46    0.42
 -13   3  -3    2.80    0.28
 -15  -3  -3    4.89    0.35
 -15  -3  -3    5.41    0.60
 -15  -3  -3    5.63    0.47
  15  -3   3    5.79    0.83
 -15  -3  -3    4.48    0.51
  15  -3   3    4.55    0.62
  15  -3   3    4.85    0.54
 -15   3  -3    4.92    0.60
 -15   3  -3    4.79    0.56
  15   3   3    4.78    0.55
 -15   3  -3    4.49    0.47
  18  -4  -3    0.51    0.36
 -18  -4   3    0.20    0.42
  18  -4  -3    1.02    0.51
 -18  -4   3    0.79    0.43
 -18  -4   3    0.68    0.38
 -18   4   3    0.32    0.59
  18   4  -3    0.41    0.47
 -18   4   3    0.91    0.15
 -18   4   3    1.32    0.39
 -18   4   3    0.67    0.28
  18   4  -3    0.94    0.33
 -16  -4   3    0.07    0.26
 -16  -4   3    0.28    0.30
  16  -4  -3    0.19    0.25
 -16  -4   3   -0.08    0.30
  16  -4  -3   -0.09    0.35
 -16   4   3   -0.09    0.20
  16   4  -3   -0.05    0.21
  16   4  -3    0.11    0.32
 -16   4   3   -0.02    0.11
 -16   4   3    0.07    0.26
 -16   4   3    0.01    0.32
  14  -4  -3    2.08    0.30
  14  -4  -3    2.68    0.44
  14  -4  -3    2.46    0.24
 -14  -4   3    2.12    0.26
 -14  -4   3    2.12    0.26
 -14  -4   3    2.30    0.27
  14   4  -3    2.10    0.27
 -14   4   3    2.10    0.14
  14   4  -3    1.76    0.22
  14   4  -3    1.57    0.26
 -14   4   3    2.03    0.25
 -14   4   3    2.43    0.30
 -12  -4   3    1.72    0.20
 -12  -4   3    1.82    0.21
  12  -4  -3    2.31    0.28
  12  -4  -3    2.14    0.23
  12  -4  -3    1.70    0.21
 -12  -4   3    1.70    0.24
 -12   4   3    1.54    0.18
 -12   4   3    1.86    0.22
  12   4  -3    1.61    0.21
  12   4  -3    1.84    0.25
  12   4  -3    2.15    0.24
 -10  -4   3    0.83    0.15
  10  -4  -3    0.55    0.14
 -10  -4   3    0.23    0.12
  10  -4  -3    0.54    0.16
 -10  -4   3    0.53    0.14
  10  -4  -3    0.60    0.16
  10   4  -3    0.31    0.13
 -10   4   3    0.60    0.13
  10   4  -3    0.57    0.11
  10   4  -3    0.42    0.12
 -10   4   3    0.42    0.14
  -8  -4   3   20.16    0.86
  -8  -4   3   18.55    0.84
   8  -4  -3   18.07    0.86
   8  -4  -3   19.52    0.86
   8  -4  -3   18.75    0.85
  -8  -4   3   20.03    0.86
  -8   4   3   18.22    0.86
  -8   4   3   17.80    0.85
   8   4  -3   18.89    0.85
  -8   4   3   18.18    0.86
   8   4  -3   18.46    0.85
   8   4  -3   18.04    0.85
  -6  -4   3   14.32    0.65
  -6  -4   3   13.94    0.64
  -6  -4   3   14.23    0.65
  -6  -4   3   13.83    0.64
   6  -4  -3   15.22    0.66
   6  -4  -3   13.91    0.65
   6  -4  -3   13.62    0.65
   6   4  -3   14.04    0.62
   6   4  -3   14.10    0.65
  -6   4   3   14.72    0.65
   6   4  -3   13.69    0.62
  -6   4   3   14.19    0.65
   6   4  -3   15.10    0.64
   6   4  -3   14.00    0.64
   4  -4  -3    0.96    0.12
   4  -4  -3    0.89    0.10
   4  -4  -3    1.01    0.10
  -4  -4   3    0.72    0.10
  -4  -4   3    0.74    0.07
   4  -4  -3    0.67    0.10
  -4  -4   3    0.71    0.08
  -4  -4   3    0.88    0.07
   4  -4  -3    0.93    0.06
   4   4  -3    0.96    0.06
  -4   4   3    0.86    0.07
  -4   4   3    0.98    0.10
  -4   4   3    0.71    0.10
   4   4  -3    0.78    0.08
   4   4  -3    0.77    0.10
   4   4  -3    0.76    0.08
  -2  -4   3   38.87    1.65
   2  -4  -3   35.83    1.67
  -2  -4   3   37.87    1.65
  -2  -4   3   38.84    1.66
   2  -4  -3   38.14    1.67
   2  -4  -3   37.94    1.67
   2  -4  -3   37.87    1.66
   2  -4  -3   36.91    1.66
  -2  -4   3   38.36    1.65
  -2   4   3   37.99    1.67
  -2   4   3   37.48    1.67
   2   4  -3   38.77    1.65
   2   4  -3   38.07    1.66
  -2   4   3   37.19    1.66
   2   4  -3   37.62    1.67
   2   4  -3   36.85    1.66
   2   4  -3   38.36    1.66
   0  -4   3  149.05    6.31
   0  -4  -3  146.84    6.32
   0  -4  -3  145.39    6.32
   0  -4  -3  145.96    6.32
   0  -4   3  148.31    6.31
   0   4  -3  148.58    6.31
   0   4  -3  144.71    6.30
   0   4  -3  138.76    6.31
   0   4  -3  144.98    6.30
   0   4  -3  146.67    6.33
   0   4   3  139.83    6.32
   0   4   3  143.51    6.32
   0   4   3  147.09    6.32
   0   4   3  144.73    6.32
  -2  -4  -3   12.95    0.60
   2  -4   3   13.13    0.60
   2  -4   3   13.12    0.57
  -2  -4  -3   12.70    0.60
  -2  -4  -3   12.86    0.60
  -2  -4  -3   13.05    0.59
   2  -4   3   13.58    0.60
   2   4   3   13.08    0.60
   2   4   3   13.01    0.60
  -2   4  -3   12.57    0.59
  -2   4  -3   13.33    0.57
  -2   4  -3   12.95    0.60
  -2   4  -3   13.45    0.61
   2   4   3   13.05    0.60
   2   4   3   12.75    0.60
   4  -4   3    0.63    0.12
  -4  -4  -3    0.72    0.09
  -4  -4  -3    0.55    0.10
  -4  -4  -3    0.53    0.09
   4  -4   3    0.46    0.10
   4  -4   3    0.56    0.07
  -4  -4  -3    0.31    0.10
   4  -4   3    0.43    0.11
   4   4   3    0.44    0.12
  -4   4  -3    0.48    0.13
  -4   4  -3    0.60    0.11
  -4   4  -3    0.47    0.06
  -4   4  -3    0.62    0.09
   4   4   3    0.42    0.09
   4   4   3    0.29    0.11
  -6  -4  -3    0.34    0.12
   6  -4   3    0.34    0.12
   6  -4   3    0.13    0.07
   6  -4   3    0.22    0.14
   6  -4   3    0.19    0.13
  -6  -4  -3    0.25    0.10
  -6  -4  -3    0.32    0.08
  -6  -4  -3    0.36    0.12
  -6  -4  -3    0.30    0.09
  -6   4  -3    0.14    0.21
  -6   4  -3    0.49    0.13
   6   4   3    0.19    0.13
  -6   4  -3    0.26    0.10
   6   4   3    0.05    0.12
  -6   4  -3    0.27    0.07
   6   4   3    0.47    0.11
   8  -4   3    7.47    0.39
  -8  -4  -3    6.93    0.40
   8  -4   3    7.14    0.42
  -8  -4  -3    7.33    0.41
   8  -4   3    7.32    0.35
  -8  -4  -3    7.07    0.37
  -8  -4  -3    6.98    0.36
   8  -4   3    6.85    0.41
   8   4   3    7.17    0.40
   8   4   3    7.20    0.38
   8   4   3    6.08    0.41
  -8   4  -3    6.86    0.40
  -8   4  -3    5.89    0.40
  -8   4  -3    6.68    0.35
  -8   4  -3    6.69    0.36
 -10  -4  -3    0.08    0.14
  10  -4   3    0.24    0.21
  10  -4   3    0.02    0.23
 -10  -4  -3    0.25    0.19
 -10  -4  -3    0.30    0.20
  10  -4   3   -0.01    0.14
  10  -4   3    0.06    0.19
 -10  -4  -3    0.10    0.15
 -10  -4  -3    0.05    0.11
 -10   4  -3   -0.08    0.14
 -10   4  -3    0.11    0.14
  10   4   3    0.38    0.20
 -10   4  -3    0.02    0.21
  10   4   3   -0.03    0.23
 -10   4  -3    0.08    0.20
  10   4   3   -0.19    0.20
 -12  -4  -3   31.65    1.43
  12  -4   3   31.09    1.41
  12  -4   3   27.88    1.43
 -12  -4  -3   30.43    1.35
 -12  -4  -3   29.17    1.38
  12  -4   3   31.06    1.37
 -12  -4  -3   29.95    1.38
  12  -4   3   31.19    1.41
 -12  -4  -3   31.07    1.42
 -12   4  -3   30.97    1.43
  12   4   3   30.12    1.41
 -12   4  -3   28.64    1.40
 -12   4  -3   29.74    1.38
  12   4   3   30.11    1.45
 -12   4  -3   30.22    1.37
  12   4   3   29.10    1.41
 -14  -4  -3    0.21    0.35
 -14  -4  -3    0.01    0.24
  14  -4   3    0.63    0.33
  14  -4   3    0.22    0.37
 -14  -4  -3    0.19    0.17
  14  -4   3    0.32    0.29
 -14  -4  -3    0.28    0.27
 -14   4  -3    0.15    0.25
 -14   4  -3    0.17    0.26
  14   4   3    0.57    0.47
 -14   4  -3    0.26    0.34
 -14   4  -3    0.44    0.37
  14   4   3    0.64    0.34
 -17  -5   3   -0.01    0.31
 -17  -5   3   -0.23    0.38
  17  -5  -3    0.20    0.33
  17  -5  -3    0.16    0.45
 -17  -5   3    0.36    0.40
  17   5  -3    0.24    0.27
  17   5  -3    0.39    0.43
 -17   5   3   -0.19    0.37
 -17   5   3    0.12    0.32
 -17   5   3    0.13    0.25
  15  -5  -3    0.74    0.24
 -15  -5   3    0.29    0.24
 -15  -5   3    1.05    0.30
  15  -5  -3    0.95    0.31
  15  -5  -3    0.79    0.32
 -15  -5   3    0.65    0.26
 -15   5   3    0.70    0.22
 -15   5   3    0.32    0.27
 -15   5   3    0.67    0.26
  15   5  -3    0.60    0.29
  15   5  -3    0.55    0.22
 -13  -5   3    3.79    0.33
 -13  -5   3    3.78    0.33
  13  -5  -3    3.56    0.35
  13  -5  -3    3.96    0.37
  13  -5  -3    4.03    0.31
 -13  -5   3    3.70    0.35
  13   5  -3    3.71    0.39
 -13   5   3    3.80    0.34
 -13   5   3    3.45    0.28
  13   5  -3    4.37    0.30
  13   5  -3    4.53    0.35
 -11  -5   3    0.87    0.19
 -11  -5   3    0.54    0.16
  11  -5  -3    0.63    0.15
  11  -5  -3    0.67    0.19
 -11  -5   3    0.57    0.16
  11  -5  -3    0.67    0.17
  11   5  -3    0.54    0.16
 -11   5   3    0.57    0.18
  11   5  -3    0.58    0.13
 -11   5   3    0.73    0.15
  11   5  -3    0.74    0.16
   9  -5  -3    0.19    0.14
   9  -5  -3    0.11    0.12
  -9  -5   3    0.12    0.11
  -9  -5   3    0.25    0.15
  -9  -5   3    0.14    0.11
   9  -5  -3    0.28    0.14
   9   5  -3    0.11    0.11
   9   5  -3   -0.01    0.10
  -9   5   3    0.10    0.13
   9   5  -3    0.01    0.11
  -9   5   3   -0.09    0.11
  -7  -5   3   31.29    1.36
  -7  -5   3   31.14    1.38
   7  -5  -3   30.81    1.38
   7  -5  -3   30.79    1.37
   7  -5  -3   30.91    1.37
   7   5  -3   31.68    1.36
  -7   5   3   30.66    1.37
   7   5  -3   28.98    1.37
   7   5  -3   30.67    1.37
  -5  -5   3   28.68    1.26
   5  -5  -3   30.00    1.28
   5  -5  -3   29.37    1.28
  -5  -5   3   27.71    1.26
   5  -5  -3   29.75    1.25
  -5  -5   3   27.54    1.27
   5  -5  -3   29.44    1.28
  -5  -5   3   27.71    1.28
   5  -5  -3   26.54    1.28
   5   5  -3   28.15    1.27
   5   5  -3   29.12    1.28
   5   5  -3   28.34    1.26
  -5   5   3   29.23    1.28
  -5   5   3   29.61    1.25
   5   5  -3   28.87    1.25
  -3  -5   3   26.08    1.11
  -3  -5   3   26.18    1.11
  -3  -5   3   25.82    1.13
   3  -5  -3   25.21    1.12
  -3  -5   3   25.38    1.11
   3  -5  -3   25.06    1.12
   3  -5  -3   24.95    1.10
  -3  -5   3   23.84    1.11
   3  -5  -3   23.32    1.12
   3  -5  -3   24.67    1.12
   3   5  -3   25.52    1.11
   3   5  -3   24.18    1.10
   3   5  -3   26.38    1.12
  -3   5   3   24.60    1.11
   3   5  -3   25.65    1.10
  -3   5   3   25.08    1.12
   3   5  -3   25.68    1.11
   1  -5  -3   27.28    1.20
  -1  -5   3   26.69    1.19
   1  -5  -3   26.18    1.20
   1  -5  -3   26.53    1.20
   1  -5  -3   26.54    1.20
   1  -5  -3   26.86    1.19
  -1  -5   3   28.04    1.19
  -1  -5   3   27.34    1.19
   1   5  -3   26.72    1.19
   1   5  -3   27.83    1.19
  -1   5   3   27.02    1.20
  -1   5   3   27.18    1.20
   1   5  -3   27.04    1.19
  -1   5   3   27.14    1.19
   1   5  -3   27.02    1.20
  -1   5   3   26.10    1.20
   1   5  -3   27.24    1.17
   1  -5   3    1.94    0.14
   1  -5   3    2.00    0.14
  -1  -5  -3    1.79    0.14
  -1  -5  -3    1.82    0.14
  -1  -5  -3    1.57    0.14
  -1  -5  -3    2.13    0.13
   1  -5   3    2.07    0.14
   1   5   3    2.11    0.14
   1   5   3    1.74    0.14
  -1   5  -3    2.01    0.14
  -1   5  -3    1.62    0.13
   1   5   3    1.82    0.15
  -1   5  -3    2.18    0.17
   1   5   3    1.91    0.15
  -3  -5  -3    3.91    0.24
   3  -5   3    4.07    0.23
   3  -5   3    4.13    0.23
  -3  -5  -3    4.10    0.23
  -3  -5  -3    3.93    0.24
  -3  -5  -3    4.38    0.22
   3  -5   3    3.99    0.19
  -3   5  -3    4.46    0.19
  -3   5  -3    3.74    0.22
   3   5   3    4.16    0.25
   3   5   3    4.20    0.24
  -3   5  -3    3.81    0.23
   3   5   3    3.87    0.23
  -3   5  -3    4.04    0.25
   5  -5   3    0.15    0.12
   5  -5   3    0.30    0.11
  -5  -5  -3    0.06    0.11
  -5  -5  -3    0.16    0.12
  -5  -5  -3    0.27    0.09
  -5  -5  -3    0.09    0.08
   5  -5   3    0.16    0.11
   5  -5   3    0.28    0.06
  -5   5  -3    0.18    0.13
   5   5   3    0.15    0.13
  -5   5  -3    0.06    0.08
   5   5   3    0.18    0.11
  -5   5  -3    0.14    0.06
  -5   5  -3    0.29    0.13
   5   5   3    0.22    0.10
  -7  -5  -3    3.58    0.21
  -7  -5  -3    3.43    0.27
  -7  -5  -3    3.25    0.23
   7  -5   3    3.82    0.20
   7  -5   3    3.69    0.28
   7  -5   3    3.37    0.25
  -7  -5  -3    3.20    0.26
  -7  -5  -3    3.76    0.22
   7  -5   3    3.20    0.27
   7   5   3    3.08    0.28
   7   5   3    3.56    0.27
  -7   5  -3    3.34    0.23
  -7   5  -3    3.38    0.27
   7   5   3    3.82    0.26
  -7   5  -3    3.50    0.21
  -7   5  -3    3.21    0.32
   9  -5   3    3.59    0.32
   9  -5   3    3.96    0.32
  -9  -5  -3    4.45    0.27
  -9  -5  -3    3.79    0.32
   9  -5   3    3.96    0.35
  -9  -5  -3    3.70    0.34
  -9  -5  -3    3.67    0.27
   9  -5   3    4.00    0.27
  -9  -5  -3    4.08    0.24
  -9   5  -3    3.82    0.26
   9   5   3    3.27    0.32
  -9   5  -3    4.42    0.26
   9   5   3    3.67    0.36
  -9   5  -3    3.87    0.33
   9   5   3    4.24    0.32
  -9   5  -3    3.97    0.34
 -11  -5  -3   57.69    2.56
 -11  -5  -3   56.68    2.62
  11  -5   3   56.22    2.57
  11  -5   3   60.51    2.61
 -11  -5  -3   58.55    2.59
  11  -5   3   58.46    2.60
  11  -5   3   58.60    2.63
 -11   5  -3   57.10    2.60
  11   5   3   58.63    2.62
 -11   5  -3   58.45    2.59
  11   5   3   57.83    2.60
  11   5   3   57.62    2.63
 -11   5  -3   62.73    2.63
 -13  -5  -3    0.73    0.34
  13  -5   3    0.73    0.43
 -13  -5  -3    0.84    0.24
  13  -5   3    0.95    0.34
  13  -5   3    0.98    0.30
 -13  -5  -3    0.58    0.23
 -13  -5  -3    1.01    0.16
  13  -5   3    1.00    0.25
 -13   5  -3    1.72    0.33
 -13   5  -3    0.80    0.24
 -13   5  -3    1.01    0.22
  13   5   3    0.68    0.30
  13   5   3    0.88    0.42
 -13   5  -3    1.20    0.35
 -15  -5  -3    1.34    0.21
  15  -5   3    1.65    0.39
 -15  -5  -3    1.08    0.45
 -15  -5  -3    1.22    0.32
  15  -5   3    1.84    0.63
 -15  -5  -3    1.34    0.32
 -15   5  -3    1.54    0.47
 -15   5  -3    1.52    0.43
  15   5   3    1.08    0.38
 -15   5  -3    1.44    0.29
  15   5   3    1.34    0.66
 -15   5  -3    2.09    0.35
  16  -6  -3    1.31    0.32
 -16  -6   3    1.79    0.35
  16  -6  -3    1.77    0.44
 -16  -6   3    0.92    0.31
 -16  -6   3    1.95    0.40
 -16   6   3    1.82    0.27
 -16   6   3    1.68    0.33
 -16   6   3    2.25    0.39
  16   6  -3    1.42    0.29
  16   6  -3    1.26    0.37
  14  -6  -3    8.85    0.62
  14  -6  -3    9.46    0.54
 -14  -6   3    9.90    0.56
 -14  -6   3    9.88    0.59
  14  -6  -3   10.66    0.57
 -14  -6   3    8.84    0.56
  14   6  -3    9.53    0.53
 -14   6   3    8.93    0.56
  14   6  -3    9.55    0.58
 -14   6   3    9.74    0.58
  14   6  -3    9.19    0.57
 -14   6   3    9.47    0.52
  12  -6  -3   50.16    2.13
  12  -6  -3   46.86    2.16
 -12  -6   3   47.52    2.14
 -12  -6   3   49.06    2.15
  12  -6  -3   47.00    2.14
 -12  -6   3   47.40    2.15
 -12   6   3   47.81    2.15
  12   6  -3   49.06    2.15
  12   6  -3   45.86    2.13
 -12   6   3   49.53    2.16
  12   6  -3   47.35    2.14
 -12   6   3   48.24    2.14
 -10  -6   3   21.87    1.06
  10  -6  -3   24.20    1.08
 -10  -6   3   23.86    1.07
  10  -6  -3   23.82    1.06
  10  -6  -3   23.79    1.07
 -10  -6   3   23.28    1.06
  10   6  -3   22.27    1.06
 -10   6   3   22.35    1.07
  10   6  -3   23.55    1.06
 -10   6   3   23.11    1.06
 -10   6   3   22.70    1.07
  10   6  -3   23.64    1.06
   8  -6  -3    3.77    0.26
  -8  -6   3    4.67    0.28
   8  -6  -3    3.77    0.27
   8  -6  -3    3.59    0.24
  -8  -6   3    3.99    0.25
  -8  -6   3    4.27    0.24
  -8  -6   3    4.60    0.25
  -8   6   3    3.78    0.25
   8   6  -3    4.58    0.26
   8   6  -3    4.68    0.26
   8   6  -3    4.15    0.25
  -8   6   3    3.59    0.26
   6  -6  -3    3.36    0.22
  -6  -6   3    3.15    0.22
   6  -6  -3    3.42    0.21
  -6  -6   3    3.05    0.19
   6  -6  -3    3.39    0.23
   6  -6  -3    3.46    0.22
  -6  -6   3    3.46    0.19
   6   6  -3    3.33    0.19
  -6   6   3    2.77    0.20
   6   6  -3    2.95    0.20
  -6   6   3    3.45    0.15
   6   6  -3    3.72    0.20
   6   6  -3    3.05    0.15
   4  -6  -3    8.21    0.40
   4  -6  -3    8.55    0.37
  -4  -6   3    8.20    0.38
   4  -6  -3    8.67    0.40
  -4  -6   3    8.08    0.38
  -4  -6   3    8.16    0.41
   4  -6  -3    8.54    0.43
   4  -6  -3    8.35    0.40
  -4  -6   3    8.51    0.39
  -4  -6   3    8.35    0.38
   4   6  -3    8.21    0.37
   4   6  -3    8.15    0.42
  -4   6   3    8.62    0.38
   4   6  -3    8.09    0.38
   4   6  -3    8.12    0.39
  -4   6   3    6.79    0.40
  -4   6   3    8.04    0.42
  -2  -6   3   20.69    0.89
   2  -6  -3   19.02    0.90
   2  -6  -3   19.40    0.90
   2  -6  -3   19.21    0.89
  -2  -6   3   20.96    0.89
   2  -6  -3   20.22    0.90
  -2  -6   3   20.17    0.88
  -2  -6   3   20.45    0.89
   2  -6  -3   19.49    0.90
   2   6  -3   20.49    0.89
   2   6  -3   20.05    0.88
  -2   6   3   19.30    0.89
   2   6  -3   20.46    0.90
   2   6  -3   20.46    0.91
  -2   6   3   19.77    0.90
  -2   6   3   19.76    0.90
  -2   6   3   20.88    0.91
   2   6  -3   19.28    0.90
   0  -6   3    3.84    0.22
   0  -6   3    3.98    0.21
   0  -6  -3    3.70    0.22
   0  -6  -3    4.36    0.21
   0  -6  -3    4.00    0.21
   0  -6  -3    3.94    0.22
   0  -6   3    4.29    0.23
   0  -6  -3    4.05    0.23
   0   6   3    3.78    0.21
   0   6   3    3.94    0.23
   0   6   3    3.36    0.21
   0   6  -3    3.79    0.23
   0   6   3    3.71    0.23
   0   6  -3    3.82    0.22
   0   6  -3    4.08    0.21
  -2  -6  -3   17.83    0.79
  -2  -6  -3   16.66    0.79
  -2  -6  -3   17.26    0.78
  -2  -6  -3   17.32    0.78
   2  -6   3   16.81    0.79
   2  -6   3   17.69    0.78
   2   6   3   17.32    0.80
  -2   6  -3   17.52    0.80
  -2   6  -3   16.44    0.78
   2   6   3   16.64    0.79
   2   6   3   17.64    0.78
  -2   6  -3   17.99    0.79
   4  -6   3   17.78    0.76
  -4  -6  -3   17.16    0.79
  -4  -6  -3   17.31    0.80
  -4  -6  -3   17.27    0.78
   4  -6   3   17.61    0.79
  -4  -6  -3   17.43    0.78
   4  -6   3   16.50    0.79
   4   6   3   16.90    0.79
   4   6   3   16.74    0.80
  -4   6  -3   17.50    0.78
  -4   6  -3   16.84    0.76
  -4   6  -3   17.12    0.81
  -4   6  -3   16.10    0.79
   4   6   3   18.17    0.80
   6  -6   3    3.78    0.29
   6  -6   3    4.32    0.27
  -6  -6  -3    4.30    0.29
  -6  -6  -3    4.06    0.27
  -6  -6  -3    3.88    0.24
   6  -6   3    3.90    0.21
  -6  -6  -3    4.24    0.25
  -6   6  -3    3.92    0.25
   6   6   3    4.09    0.29
   6   6   3    4.42    0.30
  -6   6  -3    3.97    0.33
  -6   6  -3    4.09    0.22
  -6   6  -3    4.87    0.30
   6   6   3    4.42    0.27
   8  -6   3   13.71    0.67
  -8  -6  -3   13.68    0.64
  -8  -6  -3   13.01    0.71
   8  -6   3   12.45    0.68
  -8  -6  -3   14.15    0.67
  -8  -6  -3   13.17    0.64
   8  -6   3   13.49    0.66
   8  -6   3   13.85    0.62
  -8   6  -3   12.94    0.68
   8   6   3   13.33    0.69
  -8   6  -3   13.57    0.64
  -8   6  -3   14.64    0.63
  -8   6  -3   13.24    0.68
   8   6   3   12.14    0.66
   8   6   3   13.33    0.66
 -10  -6  -3    1.69    0.27
  10  -6   3    2.08    0.21
 -10  -6  -3    1.76    0.22
  10  -6   3    2.06    0.31
 -10  -6  -3    1.76    0.23
  10  -6   3    1.79    0.26
 -10  -6  -3    1.26    0.18
 -10  -6  -3    2.53    0.29
  10  -6   3    1.47    0.23
 -10   6  -3    2.08    0.22
 -10   6  -3    2.00    0.26
  10   6   3    1.90    0.32
  10   6   3    2.42    0.36
 -10   6  -3    2.36    0.24
  10   6   3    2.45    0.29
 -10   6  -3    1.51    0.26
  12  -6   3    4.07    0.46
 -12  -6  -3    3.76    0.49
  12  -6   3    3.48    0.51
 -12  -6  -3    3.65    0.34
 -12  -6  -3    3.92    0.35
 -12  -6  -3    3.74    0.26
 -12  -6  -3    3.65    0.43
  12  -6   3    3.94    0.40
  12  -6   3    3.43    0.33
 -12   6  -3    3.72    0.34
  12   6   3    4.23    0.53
 -12   6  -3    3.89    0.45
 -12   6  -3    4.23    0.44
 -12   6  -3    3.45    0.30
  14  -6   3    2.87    0.34
  14  -6   3    2.85    0.37
 -14  -6  -3    3.17    0.38
 -14  -6  -3    2.95    0.46
 -14  -6  -3    3.45    0.28
  14  -6   3    2.73    0.58
 -14  -6  -3    3.49    0.41
  14   6   3    3.47    0.60
  14   6   3    3.94    0.49
 -14   6  -3    3.00    0.35
 -14   6  -3    2.74    0.41
 -14   6  -3    3.18    0.40
 -14   6  -3    2.39    0.45
 -17  -7   3    7.12    0.63
 -17  -7   3    6.64    0.58
  17  -7  -3    5.97    0.80
 -17   7   3    6.57    0.68
 -17   7   3    6.33    0.52
  17   7  -3    7.12    0.71
  17   7  -3    7.10    0.57
 -17   7   3    7.78    0.63
 -15  -7   3    6.39    0.48
  15  -7  -3    6.73    0.54
  15  -7  -3    6.26    0.49
 -15  -7   3    6.11    0.57
 -15  -7   3    6.57    0.51
  15  -7  -3    7.03    0.58
  15   7  -3    6.54    0.46
  15   7  -3    5.43    0.53
 -15   7   3    6.45    0.45
 -15   7   3    5.82    0.67
 -15   7   3    5.55    0.52
  13  -7  -3    0.33    0.26
  13  -7  -3    0.26    0.24
  13  -7  -3    0.14    0.22
 -13  -7   3    0.21    0.26
 -13  -7   3    0.05    0.20
 -13  -7   3    0.06    0.22
 -13   7   3    0.21    0.19
 -13   7   3    0.29    0.24
  13   7  -3    0.28    0.22
 -13   7   3    0.26    0.21
  13   7  -3    0.35    0.24
  13   7  -3    0.21    0.18
 -11  -7   3    3.01    0.30
 -11  -7   3    3.50    0.33
 -11  -7   3    3.33    0.26
  11  -7  -3    3.20    0.28
 -11  -7   3    3.02    0.27
  11  -7  -3    2.96    0.31
  11  -7  -3    3.10    0.32
 -11   7   3    2.76    0.26
 -11   7   3    3.53    0.30
  11   7  -3    2.93    0.30
  11   7  -3    2.26    0.25
  11   7  -3    3.00    0.28
  -9  -7   3   18.30    0.85
  -9  -7   3   18.17    0.83
   9  -7  -3   17.72    0.85
  -9  -7   3   17.50    0.83
  -9  -7   3   17.73    0.83
   9  -7  -3   18.83    0.84
   9  -7  -3   17.82    0.84
  -9   7   3   18.51    0.85
   9   7  -3   17.14    0.84
  -9   7   3   17.77    0.84
   9   7  -3   17.94    0.82
   9   7  -3   17.55    0.83
   7  -7  -3    7.82    0.41
  -7  -7   3    7.68    0.38
  -7  -7   3    7.49    0.42
  -7  -7   3    7.53    0.39
  -7  -7   3    7.54    0.38
   7  -7  -3    7.76    0.39
   7  -7  -3    9.08    0.50
   7  -7  -3    7.68    0.42
   7   7  -3    7.63    0.39
   7   7  -3    8.21    0.40
   7   7  -3    7.71    0.34
  -7   7   3    7.36    0.39
   7   7  -3    7.73    0.38
  -7   7   3    7.39    0.40
   5  -7  -3    1.20    0.14
   5  -7  -3    1.09    0.13
   5  -7  -3    0.94    0.14
   5  -7  -3    0.86    0.13
  -5  -7   3    1.01    0.12
   5  -7  -3    0.98    0.09
  -5  -7   3    0.81    0.09
  -5  -7   3    0.94    0.12
  -5  -7   3    0.95    0.09
  -5  -7   3    1.10    0.24
   5  -7  -3    1.05    0.14
  -5   7   3    0.86    0.13
  -5   7   3    0.99    0.14
   5   7  -3    1.04    0.08
   5   7  -3    1.04    0.10
  -5   7   3    0.86    0.08
   5   7  -3    0.97    0.12
   5   7  -3    0.80    0.11
  -3  -7   3  117.79    5.42
  -3  -7   3  125.28    5.44
  -3  -7   3  122.58    5.41
  -3  -7   3  123.70    5.42
   3  -7  -3  125.18    5.42
   3  -7  -3  119.82    5.43
  -3  -7   3  128.35    5.43
   3  -7  -3  125.91    5.43
   3  -7  -3  130.65    5.44
   3  -7  -3  124.91    5.44
  -3   7   3  125.77    5.44
   3   7  -3  123.65    5.43
   3   7  -3  127.99    5.41
   3   7  -3  123.77    5.43
  -3   7   3  120.35    5.43
   3   7  -3  123.65    5.43
  -3   7   3  128.69    5.44
   3   7  -3  124.34    5.42
  -3   7   3  125.22    5.42
   1  -7  -3   59.33    2.57
   1  -7  -3   59.65    2.57
  -1  -7   3   61.48    2.57
   1  -7  -3   57.48    2.57
   1  -7  -3   57.54    2.56
  -1  -7   3   58.12    2.56
   1  -7  -3   58.59    2.57
  -1  -7   3   59.45    2.54
  -1   7   3   56.48    2.56
   1   7  -3   55.77    2.57
   1   7  -3   59.55    2.57
  -1   7   3   57.47    2.57
  -1   7   3   59.99    2.57
   1   7  -3   58.02    2.57
   1   7  -3   58.19    2.56
  -1  -7  -3    1.13    0.14
  -1  -7  -3    0.89    0.11
  -1  -7  -3    1.29    0.14
   1  -7   3    1.04    0.12
  -1  -7  -3    1.27    0.16
   1  -7   3    0.99    0.12
  -1  -7  -3    1.00    0.12
   1   7   3    0.95    0.12
   1   7   3    1.13    0.15
  -1   7  -3    1.03    0.13
  -1   7  -3    1.27    0.11
   1   7   3    1.43    0.16
   1   7   3    1.19    0.16
  -1   7  -3    1.10    0.15
   3  -7   3    2.91    0.20
   3  -7   3    2.85    0.26
  -3  -7  -3    2.93    0.20
   3  -7   3    2.97    0.22
  -3  -7  -3    3.25    0.22
  -3  -7  -3    3.06    0.21
  -3  -7  -3    2.62    0.18
   3   7   3    2.72    0.19
  -3   7  -3    2.92    0.18
   3   7   3    2.89    0.21
   3   7   3    3.02    0.21
  -3   7  -3    2.70    0.21
   3   7   3    3.41    0.23
  -3   7  -3    3.31    0.25
   5  -7   3    3.57    0.25
   5  -7   3    3.98    0.19
   5  -7   3    3.66    0.27
  -5  -7  -3    3.90    0.24
  -5  -7  -3    3.85    0.23
  -5  -7  -3    4.00    0.26
  -5  -7  -3    3.44    0.27
  -5   7  -3    3.97    0.24
   5   7   3    3.96    0.27
  -5   7  -3    3.93    0.27
   5   7   3    3.99    0.27
   5   7   3    3.78    0.29
  -5   7  -3    3.50    0.19
   7  -7   3   76.55    3.41
  -7  -7  -3   77.69    3.39
  -7  -7  -3   78.51    3.41
   7  -7   3   76.88    3.37
  -7  -7  -3   79.17    3.40
   7  -7   3   76.41    3.42
   7   7   3   76.66    3.41
  -7   7  -3   75.69    3.38
   7   7   3   77.62    3.44
  -7   7  -3   78.28    3.40
  -7   7  -3   80.06    3.42
  -7   7  -3   79.24    3.42
   7   7   3   74.01    3.42
   9  -7   3   44.52    1.92
   9  -7   3   42.17    1.94
   9  -7   3   42.02    1.88
  -9  -7  -3   41.63    1.93
  -9  -7  -3   42.16    1.88
  -9  -7  -3   45.32    1.93
  -9  -7  -3   42.78    1.89
  -9  -7  -3   41.05    1.90
   9   7   3   43.45    1.95
  -9   7  -3   41.98    1.89
   9   7   3   43.81    1.94
   9   7   3   42.04    1.92
  -9   7  -3   42.87    1.93
  -9   7  -3   41.89    1.90
  -9   7  -3   42.26    1.94
 -11  -7  -3    1.26    0.15
 -11  -7  -3    1.56    0.33
  11  -7   3    1.29    0.30
 -11  -7  -3    1.02    0.28
 -11  -7  -3    1.61    0.21
  11  -7   3    1.20    0.19
 -11  -7  -3    2.25    0.31
  11  -7   3    1.89    0.39
  11   7   3    1.47    0.29
  11   7   3    1.64    0.31
 -11   7  -3    1.29    0.20
 -11   7  -3    1.22    0.30
 -11   7  -3    1.19    0.29
 -11   7  -3    1.21    0.22
  11   7   3    1.41    0.36
 -13  -7  -3    4.60    0.30
 -13  -7  -3    4.40    0.39
  13  -7   3    5.32    0.65
  13  -7   3    4.80    0.40
 -13  -7  -3    4.97    0.42
 -13  -7  -3    4.68    0.52
 -13   7  -3    4.76    0.38
  13   7   3    3.87    0.54
 -13   7  -3    5.00    0.53
 -13   7  -3    3.96    0.39
 -13   7  -3    4.30    0.53
  13   7   3    4.59    0.49
  16  -8  -3    0.93    0.49
 -16  -8   3    0.99    0.38
 -16  -8   3    0.43    0.33
  16   8  -3    0.58    0.28
 -16   8   3    0.60    0.29
  16   8  -3    0.93    0.42
 -16   8   3    0.53    0.38
 -14  -8   3    0.66    0.35
 -14  -8   3    0.82    0.26
  14  -8  -3    0.58    0.37
  14  -8  -3    0.64    0.29
 -14  -8   3    0.82    0.29
  14  -8  -3    0.89    0.31
 -14   8   3    0.68    0.23
  14   8  -3    0.25    0.22
  14   8  -3    0.52    0.32
 -14   8   3    0.62    0.31
 -12  -8   3   10.80    0.60
  12  -8  -3   11.74    0.61
 -12  -8   3   11.88    0.65
 -12  -8   3   11.33    0.59
  12  -8  -3   11.63    0.67
 -12  -8   3   11.39    0.63
  12  -8  -3   11.43    0.61
  12   8  -3   10.99    0.60
  12   8  -3   10.59    0.61
 -12   8   3   11.03    0.59
  12   8  -3   11.66    0.60
 -12   8   3   11.82    0.64
 -10  -8   3    7.60    0.43
  10  -8  -3    6.97    0.44
  10  -8  -3    8.62    0.48
 -10  -8   3    7.48    0.42
  10  -8  -3    8.12    0.45
 -10  -8   3    7.79    0.45
 -10  -8   3    7.51    0.48
 -10   8   3    8.22    0.43
 -10   8   3    8.14    0.46
  10   8  -3    7.85    0.42
  10   8  -3    7.40    0.44
  10   8  -3    7.19    0.43
  -8  -8   3    1.74    0.19
   8  -8  -3    1.85    0.22
  -8  -8   3    2.07    0.18
  -8  -8   3    1.80    0.22
  -8  -8   3    2.20    0.24
   8  -8  -3    1.91    0.23
   8  -8  -3    1.84    0.25
   8  -8  -3    1.24    0.20
   8   8  -3    1.84    0.21
  -8   8   3    2.33    0.23
  -8   8   3    1.49    0.20
   8   8  -3    1.90    0.20
   8   8  -3    2.11    0.19
   6  -8  -3    8.78    0.43
  -6  -8   3    9.39    0.42
   6  -8  -3    7.93    0.45
   6  -8  -3    8.22    0.43
  -6  -8   3    8.01    0.40
   6  -8  -3    8.10    0.44
  -6  -8   3    8.51    0.43
  -6  -8   3    8.79    0.45
  -6  -8   3    8.28    0.38
   6   8  -3    8.01    0.42
   6   8  -3    8.25    0.38
  -6   8   3    7.97    0.43
  -6   8   3    8.39    0.38
   6   8  -3    8.08    0.40
   6   8  -3    8.63    0.43
  -6   8   3    8.42    0.43
   4  -8  -3    1.77    0.20
  -4  -8   3    1.94    0.13
   4  -8  -3    1.66    0.16
  -4  -8   3    2.11    0.18
  -4  -8   3    2.14    0.16
   4  -8  -3    1.78    0.18
  -4  -8   3    1.81    0.13
  -4  -8   3    1.72    0.21
   4  -8  -3    1.52    0.18
   4  -8  -3    1.98    0.14
   4   8  -3    1.96    0.16
   4   8  -3    1.98    0.12
  -4   8   3    1.74    0.13
   4   8  -3    2.34    0.17
  -4   8   3    1.84    0.18
   4   8  -3    1.99    0.12
   4   8  -3    1.99    0.17
  -4   8   3    1.71    0.17
   2  -8  -3   22.07    1.00
   2  -8  -3   21.89    0.99
   2  -8  -3   22.43    0.98
   2  -8  -3   22.28    1.00
  -2  -8   3   22.53    0.96
  -2  -8   3   21.72    1.01
   2  -8  -3   22.51    1.00
  -2  -8   3   21.39    0.97
   2   8  -3   21.77    0.97
   2   8  -3   21.91    0.99
  -2   8   3   20.16    0.97
   2   8  -3   22.51    0.96
  -2   8   3   21.45    0.99
  -2   8   3   21.39    0.99
   2   8  -3   21.31    0.99
   2   8  -3   22.27    0.99
  -2   8   3   21.52    1.00
   0  -8  -3    1.10    0.15
   0  -8   3    1.20    0.14
   0  -8  -3    1.33    0.18
   0  -8  -3    1.38    0.15
   0  -8  -3    1.59    0.14
   0  -8  -3    1.16    0.16
   0  -8   3    1.12    0.14
   0   8   3    1.24    0.17
   0   8  -3    1.41    0.15
   0   8  -3    1.33    0.17
   0   8  -3    1.13    0.14
   0   8   3    1.63    0.19
   0   8   3    1.38    0.15
   0   8   3    1.14    0.15
   0   8  -3    1.16    0.12
  -2  -8  -3    1.10    0.14
  -2  -8  -3    0.62    0.10
  -2  -8  -3    0.77    0.13
  -2  -8  -3    0.56    0.12
  -2  -8  -3    0.58    0.15
   2  -8   3    0.41    0.12
   2   8   3    0.64    0.13
   2   8   3    0.79    0.12
  -2   8  -3    0.68    0.13
  -2   8  -3    0.92    0.12
  -2   8  -3    0.98    0.14
   2   8   3    0.64    0.16
   2   8   3    0.69    0.13
   4  -8   3   49.27    2.17
   4  -8   3   44.90    2.13
  -4  -8  -3   47.81    2.15
  -4  -8  -3   51.47    2.16
  -4  -8  -3   50.00    2.17
   4  -8   3   50.69    2.16
   4  -8   3   46.07    2.17
  -4  -8  -3   48.75    2.17
  -4   8  -3   48.75    2.16
   4   8   3   50.42    2.18
  -4   8  -3   48.67    2.18
   4   8   3   50.62    2.17
   4   8   3   48.44    2.17
  -4   8  -3   48.83    2.17
   6  -8   3    1.85    0.24
   6  -8   3    1.72    0.21
  -6  -8  -3    1.61    0.20
   6  -8   3    1.30    0.11
  -6  -8  -3    1.19    0.15
  -6  -8  -3    1.50    0.16
  -6   8  -3    1.69    0.19
  -6   8  -3    1.40    0.13
  -6   8  -3    1.51    0.23
   6   8   3    1.84    0.33
  -6   8  -3    1.37    0.21
   6   8   3    0.97    0.19
   6   8   3    1.76    0.20
  -8  -8  -3    0.10    0.19
  -8  -8  -3    0.34    0.13
   8  -8   3    0.18    0.10
  -8  -8  -3    0.09    0.22
  -8  -8  -3    0.15    0.14
   8  -8   3    0.14    0.21
  -8  -8  -3    0.11    0.11
   8  -8   3    0.11    0.24
  -8   8  -3    0.26    0.23
  -8   8  -3    0.02    0.14
  -8   8  -3    0.10    0.11
   8   8   3    0.10    0.24
  -8   8  -3    0.35    0.21
   8   8   3    0.19    0.20
   8   8   3   -0.26    0.18
 -10  -8  -3    0.96    0.19
  10  -8   3    0.72    0.34
 -10  -8  -3    0.87    0.18
  10  -8   3    0.67    0.29
 -10  -8  -3    0.67    0.29
 -10  -8  -3    0.91    0.26
 -10  -8  -3    0.96    0.14
 -10   8  -3    1.10    0.29
 -10   8  -3    1.08    0.28
  10   8   3    0.56    0.33
 -10   8  -3    0.71    0.16
  10   8   3    1.10    0.29
 -10   8  -3    1.08    0.20
  10   8   3    0.67    0.26
  12  -8   3    5.13    0.66
 -12  -8  -3    5.84    0.41
 -12  -8  -3    5.42    0.51
  12  -8   3    5.11    0.38
 -12  -8  -3    5.59    0.44
 -12  -8  -3    5.36    0.32
 -12   8  -3    4.85    0.52
 -12   8  -3    5.12    0.38
 -12   8  -3    6.05    0.54
  12   8   3    4.87    0.61
  12   8   3    6.03    0.51
 -12   8  -3    4.99    0.39
  14  -8   3    1.37    0.32
 -14  -8  -3    1.74    0.33
 -14  -8  -3    1.38    0.47
 -14  -8  -3    1.81    0.25
 -14   8  -3    1.91    0.43
  14   8   3    2.03    0.70
 -14   8  -3    1.75    0.47
  14   8   3    1.84    0.42
 -14   8  -3    2.14    0.33
 -14   8  -3    1.66    0.32
 -15  -9   3    0.01    0.28
 -15  -9   3   -0.05    0.33
  15  -9  -3    0.25    0.47
  15   9  -3   -0.17    0.36
 -15   9   3   -0.04    0.26
 -15   9   3   -0.19    0.36
  15   9  -3    0.02    0.25
 -13  -9   3    0.49    0.25
 -13  -9   3    0.83    0.34
 -13  -9   3    0.75    0.23
  13  -9  -3    0.51    0.29
  13  -9  -3    0.54    0.35
  13   9  -3    0.38    0.28
 -13   9   3    0.60    0.30
  13   9  -3    1.03    0.32
  13   9  -3    0.53    0.23
 -13   9   3    0.94    0.24
 -11  -9   3    3.74    0.33
  11  -9  -3    3.93    0.36
 -11  -9   3    3.93    0.42
  11  -9  -3    4.62    0.37
  11  -9  -3    4.46    0.39
 -11  -9   3    4.03    0.32
 -11  -9   3    4.17    0.37
  11  -9  -3    4.75    0.42
 -11   9   3    4.09    0.38
  11   9  -3    3.27    0.36
  11   9  -3    5.16    0.33
 -11   9   3    4.00    0.33
  11   9  -3    4.03    0.33
  -9  -9   3    0.15    0.15
   9  -9  -3    0.12    0.18
  -9  -9   3    0.24    0.18
   9  -9  -3    0.43    0.19
   9  -9  -3    0.23    0.18
  -9  -9   3   -0.06    0.12
   9  -9  -3    0.25    0.21
  -9  -9   3   -0.01    0.21
   9   9  -3    0.21    0.15
  -9   9   3    0.01    0.18
   9   9  -3   -0.21    0.14
  -9   9   3    0.07    0.16
   9   9  -3    0.07    0.18
   7  -9  -3    2.49    0.24
  -7  -9   3    2.59    0.21
   7  -9  -3    2.47    0.27
   7  -9  -3    2.36    0.26
  -7  -9   3    2.61    0.29
  -7  -9   3    2.47    0.24
   7  -9  -3    2.59    0.25
  -7  -9   3    2.64    0.14
  -7  -9   3    2.63    0.19
   7  -9  -3    2.05    0.22
   7   9  -3    2.44    0.23
  -7   9   3    2.72    0.15
   7   9  -3    2.80    0.23
  -7   9   3    2.71    0.25
  -7   9   3    2.45    0.23
   7   9  -3    2.35    0.14
   5  -9  -3    4.36    0.34
  -5  -9   3    4.21    0.23
  -5  -9   3    4.24    0.28
   5  -9  -3    4.65    0.28
   5  -9  -3    4.18    0.31
  -5  -9   3    4.51    0.27
   5  -9  -3    4.65    0.24
   5  -9  -3    4.83    0.28
   5  -9  -3    4.26    0.30
  -5  -9   3    4.25    0.24
  -5  -9   3    4.67    0.32
  -5   9   3    4.42    0.23
  -5   9   3    4.21    0.27
   5   9  -3    5.46    0.29
   5   9  -3    4.62    0.28
   5   9  -3    4.67    0.24
   5   9  -3    4.75    0.23
  -5   9   3    4.59    0.29
  -3  -9   3   22.39    1.02
  -3  -9   3   23.56    1.04
  -3  -9   3   24.07    1.06
   3  -9  -3   23.89    1.03
   3  -9  -3   22.87    1.06
   3  -9  -3   23.24    1.04
   3  -9  -3   22.26    1.04
   3  -9  -3   22.19    1.05
  -3  -9   3   22.23    1.01
   3   9  -3   23.35    1.04
  -3   9   3   22.27    1.05
  -3   9   3   21.91    1.04
   3   9  -3   23.62    1.05
   3   9  -3   22.73    1.01
  -3   9   3   22.06    1.02
   3   9  -3   23.45    1.05
   3   9  -3   23.13    1.02
  -3   9   3   24.11    1.16
  -1  -9   3   10.96    0.50
   1  -9  -3   11.70    0.57
  -1  -9   3   11.13    0.53
  -1  -9   3   11.00    0.54
  -1  -9   3   11.29    0.55
   1  -9  -3   12.27    0.55
   1  -9  -3   11.72    0.54
   1  -9  -3   11.10    0.54
   1   9  -3   10.46    0.55
   1   9  -3   10.81    0.50
   1   9  -3   11.98    0.56
  -1   9   3   11.76    0.57
  -1   9   3   11.61    0.55
   1   9  -3   11.12    0.53
   1   9  -3   11.27    0.55
   1  -9   3    1.18    0.15
  -1  -9  -3    0.65    0.16
   1  -9   3    1.05    0.16
  -1  -9  -3    1.41    0.17
  -1  -9  -3    0.92    0.15
  -1  -9  -3    1.03    0.13
  -1  -9  -3    0.96    0.15
   1   9   3    0.78    0.15
   1   9   3    0.71    0.13
  -1   9  -3    1.31    0.16
  -1   9  -3    0.97    0.12
  -1   9  -3    0.90    0.13
   1   9   3    0.93    0.17
  -3  -9  -3    4.09    0.27
  -3  -9  -3    3.74    0.29
  -3  -9  -3    4.20    0.23
   3  -9   3    3.13    0.25
  -3  -9  -3    4.22    0.29
  -3  -9  -3    3.22    0.24
   3  -9   3    3.73    0.29
   3  -9   3    3.56    0.27
  -3   9  -3    4.09    0.23
   3   9   3    3.47    0.26
   3   9   3    3.84    0.26
  -3   9  -3    3.34    0.27
  -3   9  -3    3.21    0.25
   3   9   3    3.60    0.30
   3   9   3    3.68    0.24
  -3   9  -3    4.13    0.31
  -5  -9  -3    6.41    0.39
   5  -9   3    6.74    0.41
  -5  -9  -3    5.95    0.41
  -5  -9  -3    6.38    0.35
   5  -9   3    6.41    0.37
  -5  -9  -3    6.72    0.35
   5  -9   3    6.65    0.29
   5  -9   3    6.10    0.40
  -5  -9  -3    7.16    0.44
   5   9   3    6.45    0.39
  -5   9  -3    6.93    0.43
   5   9   3    7.29    0.43
  -5   9  -3    6.39    0.35
  -5   9  -3    6.66    0.40
   5   9   3    5.82    0.35
   5   9   3    6.29    0.38
  -5   9  -3    5.33    0.37
   7  -9   3    0.33    0.21
  -7  -9  -3    0.14    0.13
   7  -9   3    0.13    0.21
  -7  -9  -3    0.23    0.14
   7  -9   3    0.21    0.08
  -7  -9  -3    0.49    0.21
  -7  -9  -3    0.42    0.22
   7  -9   3    0.42    0.25
  -7   9  -3    0.29    0.15
  -7   9  -3   -0.09    0.23
   7   9   3    0.09    0.20
   7   9   3    0.52    0.18
   7   9   3    0.33    0.25
  -7   9  -3    0.20    0.20
   9  -9   3   30.17    1.35
  -9  -9  -3   28.65    1.31
  -9  -9  -3   27.39    1.35
   9  -9   3   29.75    1.38
   9  -9   3   27.71    1.27
  -9  -9  -3   30.05    1.35
  -9  -9  -3   28.35    1.29
  -9  -9  -3   28.31    1.29
  -9   9  -3   29.37    1.32
   9   9   3   27.74    1.37
  -9   9  -3   28.56    1.35
  -9   9  -3   29.54    1.29
  -9   9  -3   29.57    1.36
   9   9   3   29.33    1.34
   9   9   3   25.90    1.34
 -11  -9  -3    0.00    0.13
 -11  -9  -3   -0.13    0.19
 -11  -9  -3   -0.02    0.19
 -11  -9  -3   -0.18    0.29
  11  -9   3    0.00    0.16
  11  -9   3   -0.22    0.57
 -11   9  -3   -0.10    0.21
  11   9   3    0.05    0.41
 -11   9  -3    0.06    0.32
  11   9   3    0.07    0.27
 -11   9  -3   -0.07    0.32
 -11   9  -3   -0.03    0.19
 -13  -9  -3    0.41    0.39
 -13  -9  -3    0.76    0.17
  13  -9   3    0.87    0.26
 -13  -9  -3    0.53    0.26
 -13  -9  -3    0.89    0.24
 -13   9  -3    0.75    0.41
 -13   9  -3    0.94    0.28
  13   9   3    1.04    0.38
 -13   9  -3    0.40    0.26
 -13   9  -3    0.61    0.42
  13   9   3    0.70    0.58
  14 -10  -3    2.98    0.52
 -14 -10   3    2.79    0.38
  14 -10  -3    2.48    0.39
 -14 -10   3    2.38    0.33
 -14  10   3    1.82    0.32
 -14  10   3    2.47    0.40
  14  10  -3    2.13    0.31
  14  10  -3    2.27    0.40
 -12 -10   3   15.72    0.82
  12 -10  -3   13.42    0.75
  12 -10  -3   15.38    0.77
  12 -10  -3   15.83    0.83
 -12 -10   3   14.39    0.75
 -12 -10   3   15.12    0.74
  12 -10  -3   14.73    0.80
  12  10  -3   12.28    0.78
  12  10  -3   13.85    0.74
  12  10  -3   13.82    0.74
 -12  10   3   15.49    0.78
 -12  10   3   14.95    0.79
  10 -10  -3    0.18    0.22
  10 -10  -3   -0.04    0.26
 -10 -10   3    0.17    0.18
 -10 -10   3    0.22    0.30
 -10 -10   3    0.13    0.15
 -10 -10   3    0.27    0.24
  10 -10  -3    0.12    0.21
 -10  10   3    0.01    0.24
  10  10  -3    0.40    0.19
  10  10  -3    0.11    0.17
  10  10  -3    0.01    0.21
 -10  10   3    0.02    0.19
   8 -10  -3    7.22    0.44
   8 -10  -3    6.73    0.41
  -8 -10   3    6.60    0.42
  -8 -10   3    6.16    0.38
   8 -10  -3    6.25    0.39
  -8 -10   3    6.56    0.36
  -8 -10   3    7.35    0.44
   8 -10  -3    6.84    0.41
   8 -10  -3    7.47    0.45
   8  10  -3    6.49    0.30
  -8  10   3    6.92    0.33
  -8  10   3    6.95    0.31
   8  10  -3    6.60    0.40
  -8  10   3    6.65    0.42
   8  10  -3    6.45    0.41
   8  10  -3    6.69    0.37
  -8  10   3    5.75    0.38
  -6 -10   3   13.25    0.67
   6 -10  -3   13.27    0.64
   6 -10  -3   13.15    0.67
   6 -10  -3   13.21    0.65
   6 -10  -3   13.40    0.65
   6 -10  -3   11.67    0.67
  -6 -10   3   13.63    0.62
  -6 -10   3   13.56    0.65
  -6 -10   3   13.47    0.64
  -6 -10   3   12.69    0.60
  -6  10   3   13.33    0.64
   6  10  -3   13.40    0.60
   6  10  -3   14.08    0.65
  -6  10   3   12.74    0.66
   6  10  -3   13.49    0.61
  -6  10   3   13.03    0.60
   6  10  -3   13.27    0.66
  -4 -10   3   11.16    0.58
  -4 -10   3   12.11    0.53
   4 -10  -3   11.15    0.55
  -4 -10   3   11.69    0.52
   4 -10  -3   11.69    0.56
  -4 -10   3   10.23    0.56
   4 -10  -3   11.92    0.59
   4 -10  -3   11.42    0.54
   4 -10  -3   11.45    0.58
  -4  10   3   12.64    0.58
   4  10  -3   10.41    0.56
   4  10  -3   10.26    0.55
  -4  10   3   12.22    0.53
   4  10  -3   11.56    0.52
   4  10  -3   10.98    0.52
  -4  10   3   11.16    0.56
   4  10  -3   11.09    0.57
  -2 -10   3   16.12    0.76
   2 -10  -3   16.36    0.78
   2 -10  -3   16.71    0.76
  -2 -10   3   15.28    0.76
   2 -10  -3   17.45    0.75
  -2 -10   3   16.00    0.74
   2 -10  -3   16.38    0.78
  -2 -10   3   16.28    0.72
   2 -10  -3   16.87    0.75
  -2  10   3   16.12    0.76
   2  10  -3   16.54    0.72
   2  10  -3   15.56    0.74
  -2  10   3   16.20    0.75
   2  10  -3   14.54    0.78
  -2  10   3   16.24    0.77
   2  10  -3   16.27    0.77
   2  10  -3   16.47    0.77
  -2  10   3   16.85    0.79
   0 -10  -3   40.55    1.87
   0 -10  -3   41.94    1.86
   0 -10  -3   40.55    1.85
   0 -10   3   41.58    1.85
   0 -10   3   43.34    1.87
   0 -10  -3   41.69    1.88
   0 -10  -3   41.34    1.85
   0  10   3   41.77    1.86
   0  10  -3   41.64    1.86
   0  10   3   41.51    1.86
   0  10  -3   41.51    1.85
   0  10   3   41.24    1.86
   0  10   3   42.14    1.93
   0  10  -3   43.16    1.87
   0  10  -3   43.44    1.88
  -2 -10  -3    6.55    0.36
  -2 -10  -3    6.27    0.39
  -2 -10  -3    6.01    0.37
   2 -10   3    5.89    0.35
  -2 -10  -3    6.47    0.33
  -2 -10  -3    6.60    0.35
   2 -10   3    6.18    0.37
   2 -10   3    6.35    0.39
   2  10   3    5.97    0.40
   2  10   3    5.58    0.34
  -2  10  -3    6.36    0.36
   2  10   3    6.49    0.36
  -2  10  -3    6.36    0.37
   2  10   3    6.41    0.38
  -2  10  -3    6.42    0.34
  -4 -10  -3   62.55    2.87
   4 -10   3   65.68    2.86
  -4 -10  -3   64.88    2.85
  -4 -10  -3   63.74    2.86
   4 -10   3   66.14    2.87
   4 -10   3   66.72    2.88
  -4 -10  -3   65.87    2.86
  -4 -10  -3   61.86    2.87
  -4  10  -3   65.62    2.86
  -4  10  -3   67.26    2.88
  -4  10  -3   66.13    2.86
   4  10   3   63.13    2.87
   4  10   3   62.35    2.85
   4  10   3   64.40    2.86
   4  10   3   66.35    2.88
  -4  10  -3   63.82    2.87
  -6 -10  -3   16.28    0.84
   6 -10   3   17.28    0.76
  -6 -10  -3   17.19    0.81
   6 -10   3   16.50    0.83
  -6 -10  -3   17.09    0.87
   6 -10   3   15.64    0.85
   6 -10   3   17.05    0.85
  -6 -10  -3   18.50    0.84
  -6  10  -3   17.03    0.86
  -6  10  -3   17.50    0.82
   6  10   3   18.71    0.85
  -6  10  -3   16.69    0.81
  -6  10  -3   17.28    0.85
   6  10   3   17.27    0.87
   6  10   3   17.84    0.84
   8 -10   3   16.78    0.85
  -8 -10  -3   17.04    0.87
  -8 -10  -3   16.82    0.82
   8 -10   3   16.95    0.87
  -8 -10  -3   16.41    0.80
   8 -10   3   16.73    0.90
  -8 -10  -3   17.74    0.86
   8 -10   3   15.92    0.76
   8  10   3   17.51    0.90
   8  10   3   16.47    0.85
   8  10   3   17.44    0.87
  -8  10  -3   17.05    0.81
  -8  10  -3   16.98    0.86
  -8  10  -3   17.18    0.88
 -10 -10  -3    0.17    0.20
  10 -10   3    0.07    0.14
 -10 -10  -3   -0.23    0.19
 -10 -10  -3   -0.17    0.28
 -10 -10  -3   -0.05    0.14
  10 -10   3   -0.02    0.44
 -10  10  -3    0.27    0.32
 -10  10  -3   -0.08    0.21
 -10  10  -3    0.28    0.30
  10  10   3    0.01    0.28
  10  10   3   -0.03    0.39
 -12 -10  -3   -0.10    0.37
 -12 -10  -3    0.26    0.16
  12 -10   3    0.09    0.21
  12 -10   3    0.04    0.87
 -12 -10  -3    0.01    0.23
 -12 -10  -3    0.07    0.21
  12  10   3    0.29    0.34
 -12  10  -3    0.41    0.40
 -12  10  -3    0.23    0.37
 -12  10  -3    0.22    0.24
  12  10   3   -0.28    0.53
 -12  10  -3    0.00    0.25
  15 -11  -3    3.13    0.50
  15 -11  -3    3.95    0.64
 -15 -11   3    3.74    0.49
 -15 -11   3    3.50    0.48
 -15  11   3    3.75    0.53
 -15  11   3    3.78    0.49
  15  11  -3    3.28    0.53
  15  11  -3    3.62    0.47
 -13 -11   3    1.66    0.33
  13 -11  -3    1.40    0.39
 -13 -11   3    1.56    0.29
  13 -11  -3    1.76    0.35
  13 -11  -3    1.73    0.46
  13  11  -3    1.50    0.29
 -13  11   3    0.96    0.28
 -13  11   3    1.39    0.36
  13  11  -3    2.18    0.40
  11 -11  -3    5.69    0.47
  11 -11  -3    6.83    0.56
 -11 -11   3    5.98    0.45
 -11 -11   3    6.11    0.58
  11 -11  -3    6.64    0.49
 -11 -11   3    6.75    0.64
  11 -11  -3    6.15    0.51
 -11 -11   3    6.60    0.42
  11  11  -3    6.98    0.49
 -11  11   3    6.77    0.58
 -11  11   3    6.43    0.49
  11  11  -3    6.58    0.48
  -9 -11   3    0.56    0.21
   9 -11  -3    0.24    0.22
   9 -11  -3    0.26    0.24
   9 -11  -3    0.58    0.28
  -9 -11   3    0.32    0.29
  -9 -11   3    0.54    0.15
  -9 -11   3    0.59    0.26
   9 -11  -3    0.53    0.19
   9 -11  -3    0.30    0.24
  -9  11   3    0.31    0.10
  -9  11   3    0.25    0.20
   9  11  -3    0.26    0.22
   9  11  -3    0.65    0.20
   9  11  -3    0.23    0.18
  -9  11   3    0.27    0.23
   7 -11  -3    7.60    0.49
   7 -11  -3    7.42    0.44
  -7 -11   3    7.50    0.45
  -7 -11   3    7.46    0.38
  -7 -11   3    6.84    0.41
   7 -11  -3    7.31    0.44
   7 -11  -3    7.36    0.46
   7 -11  -3    6.27    0.41
  -7 -11   3    7.31    0.48
  -7 -11   3    7.18    0.35
   7  11  -3    7.44    0.39
   7  11  -3    6.91    0.47
  -7  11   3    7.94    0.45
   7  11  -3    7.48    0.42
  -7  11   3    6.95    0.41
  -7  11   3    7.15    0.36
   7  11  -3    7.45    0.35
  -5 -11   3   53.17    2.28
   5 -11  -3   53.71    2.31
  -5 -11   3   50.42    2.33
   5 -11  -3   52.09    2.29
   5 -11  -3   50.89    2.32
   5 -11  -3   53.28    2.33
  -5 -11   3   51.57    2.31
   5 -11  -3   51.30    2.30
  -5 -11   3   51.69    2.28
   5 -11  -3   51.41    2.31
  -5  11   3   52.12    2.31
  -5  11   3   51.37    2.28
   5  11  -3   50.70    2.31
   5  11  -3   51.96    2.28
  -5  11   3   54.61    2.32
   5  11  -3   50.36    2.28
   3 -11  -3   33.57    1.48
   3 -11  -3   31.38    1.44
   3 -11  -3   30.74    1.47
   3 -11  -3   33.52    1.44
  -3 -11   3   31.78    1.42
   3 -11  -3   31.79    1.45
  -3 -11   3   32.85    1.48
  -3 -11   3   33.01    1.46
  -3 -11   3   32.64    1.46
  -3 -11   3   32.57    1.44
  -3  11   3   32.15    1.46
  -3  11   3   33.66    1.44
   3  11  -3   30.10    1.46
  -3  11   3   31.39    1.49
   3  11  -3   33.58    1.42
  -3  11   3   32.98    1.47
   3  11  -3   32.54    1.43
   3  11  -3   32.81    1.47
   3  11  -3   30.47    1.46
   1 -11  -3   47.22    2.10
  -1 -11   3   49.10    2.07
   1 -11  -3   45.23    2.07
   1 -11  -3   47.48    2.08
   1 -11  -3   47.57    2.09
  -1 -11   3   46.43    2.04
  -1 -11   3   46.28    2.09
   1 -11  -3   47.09    2.10
  -1  11   3   46.15    2.08
  -1  11   3   46.96    2.11
   1  11  -3   44.78    2.09
  -1  11   3   47.99    2.09
  -1  11   3   46.50    2.09
   1  11  -3   45.95    2.07
   1  11  -3   46.74    2.09
   1  11  -3   49.34    2.11
  -1 -11  -3   14.88    0.75
   1 -11   3   16.46    0.74
  -1 -11  -3   15.74    0.77
  -1 -11  -3   15.23    0.74
   1 -11   3   15.05    0.75
  -1 -11  -3   16.03    0.74
   1 -11   3   15.77    0.76
  -1 -11  -3   15.14    0.72
   1  11   3   15.24    0.78
  -1  11  -3   16.05    0.75
  -1  11  -3   15.40    0.72
   1  11   3   15.90    0.74
   1  11   3   14.46    0.73
  -1  11  -3   15.36    0.74
   1  11   3   15.75    0.75
   3 -11   3    4.11    0.29
  -3 -11  -3    3.64    0.27
  -3 -11  -3    3.96    0.31
   3 -11   3    4.15    0.31
  -3 -11  -3    4.16    0.25
  -3 -11  -3    3.84    0.35
   3 -11   3    4.19    0.35
  -3 -11  -3    3.68    0.33
   3  11   3    3.17    0.28
  -3  11  -3    3.78    0.26
   3  11   3    3.41    0.27
   3  11   3    3.81    0.31
  -3  11  -3    3.76    0.31
  -3  11  -3    3.97    0.38
  -3  11  -3    4.35    0.30
   3  11   3    3.41    0.37
  -5 -11  -3   36.25    1.66
   5 -11   3   37.91    1.65
  -5 -11  -3   36.81    1.63
   5 -11   3   36.49    1.67
  -5 -11  -3   35.43    1.66
   5 -11   3   35.70    1.67
  -5 -11  -3   35.54    1.68
  -5 -11  -3   36.50    1.63
   5  11   3   37.91    1.69
   5  11   3   37.60    1.66
   5  11   3   35.50    1.65
  -5  11  -3   35.89    1.65
  -5  11  -3   35.68    1.68
  -5  11  -3   37.62    1.67
   5  11   3   36.67    1.63
  -5  11  -3   35.99    1.64
  -7 -11  -3    6.13    0.38
   7 -11   3    6.46    0.32
  -7 -11  -3    7.60    0.49
   7 -11   3    6.45    0.52
   7 -11   3    6.26    0.31
  -7 -11  -3    5.77    0.38
   7 -11   3    6.76    0.48
  -7 -11  -3    6.27    0.47
   7 -11   3    6.69    0.49
  -7 -11  -3    6.74    0.55
   7  11   3    7.52    0.50
   7  11   3    6.44    0.44
   7  11   3    6.57    0.53
  -7  11  -3    6.43    0.40
  -7  11  -3    7.09    0.48
  -7  11  -3    5.87    0.51
  -7  11  -3    6.10    0.41
   9 -11   3   14.75    0.85
  -9 -11  -3   13.88    0.81
  -9 -11  -3   16.50    0.89
  -9 -11  -3   14.29    0.71
  -9 -11  -3   16.21    0.76
  -9 -11  -3   15.42    0.75
   9 -11   3   14.78    0.69
   9 -11   3   14.92    0.90
  -9  11  -3   15.18    0.84
  -9  11  -3   13.77    0.76
   9  11   3   15.76    0.88
   9  11   3   15.61    0.81
  -9  11  -3   14.87    0.83
  -9  11  -3   15.30    0.76
  11 -11   3   14.74    1.24
 -11 -11  -3   11.33    0.66
 -11 -11  -3   13.00    0.77
 -11 -11  -3   11.04    0.59
 -11  11  -3   11.89    0.67
 -11  11  -3   11.85    0.79
  11  11   3   12.11    0.89
 -11  11  -3   12.23    0.67
  11  11   3   11.40    0.73
 -11  11  -3   12.65    0.79
  14 -12  -3   -0.29    0.56
 -14 -12   3    0.22    0.36
 -14 -12   3   -0.09    0.29
  14 -12  -3   -0.01    0.42
 -14  12   3   -0.06    0.42
  14  12  -3   -0.03    0.47
 -14  12   3    0.10    0.33
  14  12  -3   -0.06    0.32
 -12 -12   3    1.35    0.34
 -12 -12   3    1.87    0.31
  12 -12  -3    1.96    0.38
  12  12  -3    2.60    0.41
  12  12  -3    1.66    0.29
 -12  12   3    2.38    0.39
  12  12  -3    1.76    0.34
 -12  12   3    2.11    0.32
  10 -12  -3    4.55    0.52
  10 -12  -3    5.09    0.44
 -10 -12   3    5.07    0.40
  10 -12  -3    4.93    0.48
 -10 -12   3    5.59    0.73
 -10 -12   3    4.58    0.35
  10 -12  -3    4.88    0.38
  10  12  -3    4.89    0.46
  10  12  -3    4.69    0.40
 -10  12   3    4.86    0.38
  10  12  -3    5.09    0.41
 -10  12   3    4.85    0.47
   8 -12  -3   10.46    0.61
   8 -12  -3   11.28    0.57
  -8 -12   3   10.67    0.62
  -8 -12   3   10.58    0.67
  -8 -12   3   10.10    0.54
   8 -12  -3   11.44    0.64
  -8 -12   3   11.30    0.58
  -8 -12   3   10.93    0.50
   8 -12  -3   11.09    0.60
   8 -12  -3   10.81    0.66
   8  12  -3   10.37    0.50
   8  12  -3   10.87    0.58
  -8  12   3   10.11    0.58
  -8  12   3   10.37    0.62
  -8  12   3   11.07    0.51
  -8  12   3   11.93    0.54
   8  12  -3   11.18    0.61
   8  12  -3   11.05    0.56
   6 -12  -3    5.92    0.46
  -6 -12   3    6.54    0.35
   6 -12  -3    6.26    0.44
  -6 -12   3    6.26    0.33
   6 -12  -3    6.26    0.41
  -6 -12   3    6.61    0.43
   6 -12  -3    7.20    0.43
   6 -12  -3    6.52    0.37
  -6 -12   3    6.36    0.49
  -6  12   3    6.04    0.42
   6  12  -3    6.12    0.39
   6  12  -3    6.72    0.37
  -6  12   3    6.24    0.40
   6  12  -3    6.70    0.33
  -6  12   3    6.53    0.34
   6  12  -3    6.16    0.44
   4 -12  -3    9.25    0.49
   4 -12  -3    8.83    0.46
   4 -12  -3    8.74    0.54
  -4 -12   3    8.56    0.44
  -4 -12   3    8.73    0.47
  -4 -12   3    8.33    0.42
  -4 -12   3    8.49    0.53
  -4 -12   3    9.38    0.51
   4 -12  -3    9.66    0.51
   4 -12  -3    9.12    0.47
   4  12  -3    8.50    0.48
  -4  12   3    8.75    0.45
  -4  12   3    8.74    0.49
  -4  12   3    9.38    0.51
   4  12  -3    9.45    0.43
   4  12  -3    8.57    0.50
   4  12  -3    8.26    0.48
   4  12  -3    8.83    0.44
   2 -12  -3    8.71    0.44
   2 -12  -3    8.39    0.49
  -2 -12   3    8.12    0.44
   2 -12  -3    8.94    0.46
  -2 -12   3    8.79    0.39
  -2 -12   3    8.49    0.49
   2 -12  -3    9.32    0.52
   2 -12  -3    8.47    0.47
   2  12  -3    9.12    0.43
   2  12  -3    8.45    0.40
  -2  12   3    8.87    0.53
   2  12  -3    8.81    0.51
  -2  12   3    8.12    0.48
   2  12  -3    7.60    0.46
  -2  12   3    9.06    0.45
   2  12  -3    7.81    0.46
  -2  12   3    7.85    0.46
   0 -12  -3    5.56    0.30
   0 -12   3    5.39    0.32
   0 -12  -3    4.65    0.41
   0 -12  -3    5.25    0.36
   0 -12   3    5.39    0.38
   0 -12  -3    4.74    0.34
   0 -12  -3    4.95    0.35
   0  12  -3    5.85    0.39
   0  12   3    4.68    0.32
   0  12   3    4.31    0.32
   0  12  -3    4.71    0.34
   0  12  -3    4.98    0.33
   0  12   3    5.41    0.41
   0  12  -3    5.61    0.31
   0  12   3    5.14    0.37
  -2 -12  -3   88.44    4.02
  -2 -12  -3   90.92    4.05
   2 -12   3   92.19    4.05
   2 -12   3   94.33    4.05
  -2 -12  -3   89.25    4.05
  -2 -12  -3   93.22    4.04
   2 -12   3   95.87    4.03
  -2 -12  -3   92.36    4.02
  -2  12  -3   92.95    4.03
   2  12   3   92.76    4.04
   2  12   3   92.58    4.03
   2  12   3   93.35    4.04
   2  12   3   92.54    4.06
  -2  12  -3   86.81    4.03
  -2  12  -3   89.23    4.05
  -4 -12  -3   16.43    0.81
   4 -12   3   15.93    0.76
   4 -12   3   15.71    0.78
  -4 -12  -3   15.73    0.78
  -4 -12  -3   13.59    0.77
   4 -12   3   14.50    0.80
  -4 -12  -3   15.69    0.73
  -4 -12  -3   14.55    0.72
   4  12   3   14.84    0.81
  -4  12  -3   15.33    0.75
  -4  12  -3   15.30    0.73
   4  12   3   16.69    0.77
  -4  12  -3   14.54    0.81
   4  12   3   14.63    0.76
  -4  12  -3   15.01    0.78
   4  12   3   15.12    0.74
   6 -12   3    0.12    0.32
  -6 -12  -3   -0.15    0.17
  -6 -12  -3    0.08    0.29
  -6 -12  -3    0.21    0.15
  -6 -12  -3    0.45    0.26
   6 -12   3    0.14    0.26
   6 -12   3   -0.08    0.27
  -6 -12  -3   -0.08    0.31
   6  12   3    0.06    0.16
   6  12   3   -0.07    0.27
   6  12   3   -0.24    0.33
  -6  12  -3   -0.03    0.17
  -6  12  -3    0.04    0.18
  -6  12  -3   -0.11    0.23
  -6  12  -3   -0.29    0.30
   6  12   3    0.01    0.20
  -8 -12  -3    4.51    0.32
  -8 -12  -3    3.99    0.45
   8 -12   3    3.93    0.49
   8 -12   3    3.81    0.22
   8 -12   3    4.05    0.23
   8 -12   3    4.17    0.57
  -8 -12  -3    4.67    0.56
  -8 -12  -3    3.81    0.32
  -8  12  -3    4.02    0.36
   8  12   3    3.91    0.42
  -8  12  -3    4.08    0.36
  -8  12  -3    4.90    0.46
  -8  12  -3    2.93    0.40
   8  12   3    3.95    0.56
  10 -12   3    1.88    0.42
  10 -12   3    1.99    0.23
 -10 -12  -3    2.65    0.30
 -10 -12  -3    2.17    0.26
 -10 -12  -3    2.64    0.30
 -10 -12  -3    2.20    0.56
 -10 -12  -3    2.43    0.38
 -10  12  -3    2.26    0.43
  10  12   3    2.63    0.37
 -10  12  -3    2.31    0.31
 -10  12  -3    3.45    0.46
  10  12   3    2.68    0.58
 -10  12  -3    1.99    0.29
 -13 -13   3    0.95    0.37
 -13 -13   3    0.86    0.31
  13 -13  -3    0.40    0.65
  13 -13  -3    0.37    0.38
  13 -13  -3    0.76    0.63
  13 -13  -3    1.00    0.60
  13  13  -3    1.27    0.33
 -13  13   3    1.18    0.45
  13  13  -3    0.61    0.46
 -13  13   3    0.85    0.35
  11 -13  -3    4.62    0.50
  11 -13  -3    4.57    0.42
 -11 -13   3    5.03    0.47
 -11 -13   3    4.81    0.40
  11 -13  -3    4.28    0.56
  11 -13  -3    4.05    0.53
 -11  13   3    4.50    0.45
  11  13  -3    4.40    0.48
  11  13  -3    4.61    0.54
  11  13  -3    4.21    0.41
 -11  13   3    4.71    0.53
   9 -13  -3    1.70    0.25
  -9 -13   3    1.67    0.22
  -9 -13   3    1.22    0.26
   9 -13  -3    1.73    0.33
   9 -13  -3    2.16    0.32
   9 -13  -3    2.55    0.41
   9  13  -3    1.82    0.34
   9  13  -3    1.86    0.26
   9  13  -3    1.75    0.12
  -9  13   3    2.50    0.34
  -9  13   3    2.00    0.24
  -9  13   3    2.23    0.28
   9  13  -3    1.89    0.27
   7 -13  -3    0.61    0.17
   7 -13  -3    0.55    0.24
   7 -13  -3    0.61    0.26
  -7 -13   3    0.84    0.13
   7 -13  -3    0.71    0.33
  -7 -13   3    0.62    0.16
  -7 -13   3    0.84    0.34
  -7 -13   3    0.36    0.33
  -7 -13   3    1.05    0.30
   7 -13  -3    0.82    0.27
   7  13  -3    1.03    0.22
  -7  13   3    0.91    0.14
   7  13  -3    0.86    0.27
   7  13  -3    0.59    0.18
   7  13  -3    0.54    0.13
  -7  13   3    0.69    0.27
  -7  13   3    0.93    0.23
   5 -13  -3    0.05    0.20
  -5 -13   3    0.15    0.19
  -5 -13   3    0.15    0.28
   5 -13  -3    0.40    0.30
   5 -13  -3    0.03    0.22
   5 -13  -3    0.09    0.22
  -5 -13   3    0.31    0.12
  -5 -13   3    0.10    0.14
   5 -13  -3    0.15    0.15
  -5  13   3    0.37    0.13
   5  13  -3    0.48    0.24
   5  13  -3    0.37    0.14
  -5  13   3    0.17    0.22
  -5  13   3    0.04    0.20
   5  13  -3    0.06    0.12
   5  13  -3    0.37    0.18
  -3 -13   3    1.90    0.15
   3 -13  -3    2.06    0.29
   3 -13  -3    1.63    0.25
   3 -13  -3    2.18    0.22
  -3 -13   3    1.93    0.33
   3 -13  -3    1.78    0.23
  -3 -13   3    2.14    0.29
  -3 -13   3    2.04    0.21
   3 -13  -3    2.01    0.31
  -3  13   3    1.95    0.26
  -3  13   3    2.23    0.25
  -3  13   3    2.83    0.35
   3  13  -3    1.73    0.18
  -3  13   3    1.62    0.22
   3  13  -3    1.39    0.21
   3  13  -3    1.62    0.23
   3  13  -3    2.04    0.20
   3  13  -3    1.80    0.27
  -1 -13   3   11.67    0.55
   1 -13  -3   10.78    0.56
   1 -13  -3   10.91    0.59
   1 -13  -3   11.11    0.54
  -1 -13   3   10.48    0.48
   1 -13  -3   11.85    0.63
  -1 -13   3   11.05    0.61
   1 -13  -3   10.37    0.57
   1  13  -3    9.44    0.57
   1  13  -3   10.32    0.56
   1  13  -3   10.49    0.54
  -1  13   3   10.40    0.57
  -1  13   3   11.33    0.66
  -1  13   3   10.88    0.59
   1  13  -3   10.73    0.61
  -1  13   3   11.10    0.55
   1 -13   3   43.15    1.93
   1 -13   3   40.69    1.96
  -1 -13  -3   43.83    1.92
  -1 -13  -3   41.56    1.96
  -1 -13  -3   45.84    1.94
  -1 -13  -3   42.62    1.95
   1 -13   3   44.02    1.96
  -1 -13  -3   45.47    2.06
  -1  13  -3   42.73    1.96
   1  13   3   42.45    1.94
  -1  13  -3   43.04    1.94
   1  13   3   42.83    1.94
   1  13   3   43.10    1.98
   1  13   3   42.84    1.95
  -1  13  -3   44.36    1.93
   3 -13   3    0.58    0.23
  -3 -13  -3    0.28    0.24
   3 -13   3    0.64    0.30
  -3 -13  -3    0.31    0.14
  -3 -13  -3    0.77    0.30
  -3 -13  -3    0.30    0.24
   3 -13   3    0.40    0.24
  -3 -13  -3    0.39    0.20
   3  13   3    0.55    0.32
  -3  13  -3    0.23    0.22
  -3  13  -3    0.37    0.18
  -3  13  -3    0.31    0.30
  -3  13  -3    0.19    0.18
   3  13   3    0.58    0.19
   3  13   3    0.53    0.19
   3  13   3    0.25    0.26
  -5 -13  -3    0.01    0.24
  -5 -13  -3   -0.03    0.19
   5 -13   3    0.21    0.25
  -5 -13  -3   -0.14    0.30
   5 -13   3    0.08    0.28
  -5 -13  -3    0.16    0.16
  -5 -13  -3   -0.07    0.32
   5  13   3    0.12    0.33
   5  13   3    0.32    0.19
  -5  13  -3   -0.09    0.18
  -5  13  -3   -0.14    0.23
   5  13   3   -0.04    0.22
  -5  13  -3    0.06    0.19
  -5  13  -3    0.09    0.33
   5  13   3   -0.10    0.29
  -7 -13  -3    0.07    0.42
   7 -13   3    0.53    0.44
  -7 -13  -3    0.52    0.22
  -7 -13  -3    0.26    0.19
   7 -13   3    0.52    0.31
  -7 -13  -3    0.43    0.29
  -7  13  -3    0.48    0.30
  -7  13  -3    0.50    0.23
   7  13   3    0.39    0.41
  -7  13  -3    0.33    0.34
  -7  13  -3    0.43    0.22
   7  13   3    0.45    0.26
  -9 -13  -3   -0.02    0.22
   9 -13   3    0.03    0.12
  -9 -13  -3    0.01    0.22
  -9 -13  -3   -0.04    0.55
   9 -13   3    0.05    0.11
  -9 -13  -3   -0.04    0.34
   9 -13   3    0.32    0.40
   9  13   3    0.01    0.50
   9  13   3    0.24    0.30
  -9  13  -3    0.12    0.23
  -9  13  -3   -0.13    0.34
  -9  13  -3    0.16    0.25
  -9  13  -3    0.05    0.40
 -11 -13  -3    0.87    0.29
  11 -13   3    1.60    0.27
  11 -13   3    2.38    0.56
 -11 -13  -3    1.35    0.45
 -11 -13  -3    1.59    0.22
  11 -13   3    1.49    0.20
  11  13   3    1.76    0.67
 -11  13  -3    1.63    0.34
 -11  13  -3    1.71    0.49
 -11  13  -3    1.54    0.32
  11  13   3    1.54    0.40
 -11  13  -3    2.21    0.60
 -12 -14   3    0.00    0.29
  12 -14  -3    0.08    0.39
  12 -14  -3    0.12    0.62
 -12 -14   3    0.26    0.35
  12 -14  -3   -0.09    0.30
  12 -14  -3    0.37    0.55
  12  14  -3    0.29    0.33
 -12  14   3    0.16    0.33
 -12  14   3   -0.09    0.46
  12  14  -3    0.17    0.45
  10 -14  -3    4.56    0.55
  10 -14  -3    5.07    0.54
  10 -14  -3    4.95    0.42
 -10 -14   3    4.95    0.48
  10 -14  -3    4.11    0.49
 -10 -14   3    3.85    0.37
 -10  14   3    4.65    0.45
  10  14  -3    4.11    0.45
 -10  14   3    3.69    0.52
 -10  14   3    4.40    0.26
 -10  14   3    4.26    0.30
  10  14  -3    4.26    0.55
   8 -14  -3    1.72    0.40
  -8 -14   3    1.53    0.32
   8 -14  -3    2.11    0.34
  -8 -14   3    1.55    0.21
   8 -14  -3    1.52    0.30
  -8 -14   3    1.71    0.20
   8 -14  -3    2.07    0.25
   8  14  -3    1.82    0.19
   8  14  -3    1.40    0.25
   8  14  -3    1.74    0.28
  -8  14   3    1.74    0.21
   8  14  -3    1.25    0.34
  -8  14   3    2.07    0.29
  -8  14   3    1.92    0.33
   6 -14  -3    1.22    0.29
  -6 -14   3    1.27    0.17
   6 -14  -3    1.62    0.22
   6 -14  -3    1.44    0.27
  -6 -14   3    1.45    0.25
  -6 -14   3    2.08    0.36
  -6 -14   3    1.83    0.22
   6 -14  -3    1.53    0.40
  -6 -14   3    2.20    0.43
   6 -14  -3    2.00    0.32
   6  14  -3    1.38    0.32
   6  14  -3    1.77    0.21
   6  14  -3    1.80    0.21
   6  14  -3    2.11    0.37
  -6  14   3    1.91    0.30
  -6  14   3    1.23    0.18
  -4 -14   3    1.73    0.36
  -4 -14   3    1.66    0.21
  -4 -14   3    1.25    0.33
   4 -14  -3    1.77    0.29
   4 -14  -3    1.80    0.55
   4 -14  -3    1.92    0.28
   4 -14  -3    1.80    0.23
   4 -14  -3    2.18    0.26
  -4 -14   3    1.48    0.18
  -4  14   3    1.27    0.18
   4  14  -3    1.46    0.19
   4  14  -3    1.19    0.17
   4  14  -3    1.67    0.24
   4  14  -3    1.76    0.32
  -4  14   3    1.46    0.29
  -4  14   3    1.44    0.26
   2 -14  -3   14.42    0.70
   2 -14  -3   15.27    0.74
   2 -14  -3   14.95    0.74
   2 -14  -3   14.29    0.76
  -2 -14   3   13.41    0.71
   2 -14  -3   15.14    0.81
  -2 -14   3   14.02    0.78
  -2 -14   3   14.76    0.65
  -2  14   3   14.30    0.71
  -2  14   3   13.96    0.83
   2  14  -3   14.49    0.67
   2  14  -3   14.15    0.79
   2  14  -3   14.11    0.75
   2  14  -3   14.23    0.73
   2  14  -3   14.67    0.70
  -2  14   3   15.62    0.74
   0 -14  -3   14.18    0.69
   0 -14   3   14.16    0.71
   0 -14  -3   14.66    0.74
   0 -14  -3   14.15    0.75
   0 -14  -3   13.85    0.79
   0 -14  -3   15.23    0.71
   0 -14   3   11.97    0.95
   0 -14   3   13.85    0.74
   0  14   3   14.90    0.75
   0  14   3   12.78    0.71
   0  14   3   14.00    0.71
   0  14  -3   14.79    0.70
   0  14  -3   14.83    0.75
   0  14   3   15.30    0.83
   0  14  -3   13.63    0.71
  -2 -14  -3    9.79    0.52
   2 -14   3    8.64    0.62
  -2 -14  -3   10.47    0.80
   2 -14   3    8.70    0.56
  -2 -14  -3    9.31    0.49
  -2 -14  -3    9.35    0.57
  -2 -14  -3    9.65    0.63
   2  14   3    8.70    0.59
   2  14   3    8.81    0.52
   2  14   3    9.31    0.52
   2  14   3    9.39    0.65
  -2  14  -3    9.29    0.50
  -2  14  -3   10.15    0.57
  -2  14  -3    8.67    0.52
   4 -14   3    2.03    0.33
   4 -14   3    2.60    0.33
  -4 -14  -3    2.07    0.26
  -4 -14  -3    2.78    0.42
   4 -14   3    1.62    0.38
  -4 -14  -3    2.14    0.26
  -4 -14  -3    2.88    0.33
  -4 -14  -3    3.46    0.39
   4  14   3    2.09    0.27
   4  14   3    3.04    0.37
   4  14   3    1.93    0.42
  -4  14  -3    2.47    0.32
   4  14   3    1.51    0.24
  -4  14  -3    2.13    0.41
  -4  14  -3    2.65    0.31
  -4  14  -3    2.10    0.29
  -6 -14  -3    2.92    0.34
   6 -14   3    4.70    0.53
  -6 -14  -3    3.25    0.45
   6 -14   3    3.78    0.47
  -6 -14  -3    2.99    0.34
  -6 -14  -3    3.80    0.50
   6  14   3    2.91    0.33
   6  14   3    3.41    0.42
  -6  14  -3    2.91    0.34
  -6  14  -3    3.73    0.48
  -6  14  -3    3.12    0.35
   6  14   3    2.52    0.48
  -6  14  -3    3.39    0.46
  -8 -14  -3    3.04    0.33
  -8 -14  -3    2.90    0.35
   8 -14   3    3.51    0.48
  -8 -14  -3    3.76    0.44
  -8 -14  -3    4.16    0.61
   8  14   3    3.52    0.63
  -8  14  -3    3.46    0.39
   8  14   3    3.34    0.46
  -8  14  -3    3.17    0.44
 -10 -14  -3    0.59    0.43
 -10 -14  -3    0.56    0.21
  10 -14   3    0.70    0.80
  10 -14   3    0.55    0.12
 -10 -14  -3    0.52    0.25
 -10 -14  -3    0.43    0.28
  10 -14   3    0.49    0.12
 -10  14  -3    0.19    0.31
 -10  14  -3    0.39    0.44
 -10  14  -3    0.64    0.51
  10  14   3    0.16    0.67
 -10  14  -3    0.69    0.31
  10  14   3    0.53    0.38
 -11 -15   3    0.42    0.37
  11 -15  -3    0.96    0.46
  11 -15  -3    0.75    0.30
  11 -15  -3    1.06    0.61
  11 -15  -3    0.89    0.41
 -11 -15   3    1.08    0.29
 -11  15   3    1.08    0.47
  11  15  -3    1.04    0.33
 -11  15   3    1.20    0.35
  11  15  -3    0.85    0.51
  -9 -15   3    2.71    0.35
   9 -15  -3    3.20    0.40
   9 -15  -3    3.74    0.52
   9 -15  -3    3.61    0.38
  -9 -15   3    4.19    0.47
  -9 -15   3    3.22    0.23
   9 -15  -3    2.72    0.55
   9  15  -3    2.95    0.40
  -9  15   3    3.07    0.37
  -9  15   3    3.72    0.44
  -9  15   3    3.71    0.28
  -9  15   3    3.81    0.52
   9  15  -3    3.67    0.23
   9  15  -3    2.58    0.47
   9  15  -3    3.54    0.37
   7 -15  -3    9.24    0.65
  -7 -15   3   10.08    0.52
   7 -15  -3    9.15    0.74
   7 -15  -3    9.59    0.63
   7 -15  -3    9.49    0.55
  -7 -15   3   10.14    0.51
   7  15  -3    9.12    0.57
   7  15  -3   10.13    0.59
  -7  15   3   10.07    0.60
   7  15  -3   10.70    0.70
  -7  15   3   10.30    0.51
  -7  15   3   10.76    0.67
   7  15  -3    9.18    0.50
  -5 -15   3    4.09    0.32
   5 -15  -3    3.58    0.45
  -5 -15   3    3.88    0.50
   5 -15  -3    3.67    0.45
   5 -15  -3    3.65    0.45
  -5 -15   3    3.81    0.27
   5 -15  -3    3.86    0.32
   5  15  -3    5.11    0.39
  -5  15   3    3.89    0.38
  -5  15   3    3.66    0.32
   5  15  -3    3.74    0.30
  -5  15   3    4.24    0.46
   5  15  -3    4.20    0.49
   5  15  -3    3.50    0.33
   3 -15  -3   17.29    0.89
  -3 -15   3   17.22    0.80
   3 -15  -3   17.48    0.83
   3 -15  -3   17.58    0.88
   3 -15  -3   17.94    0.92
  -3 -15   3   17.63    0.85
   3 -15  -3   17.56    0.96
  -3 -15   3   16.62    0.93
   3  15  -3   16.49    0.94
   3  15  -3   17.61    0.89
   3  15  -3   17.34    0.84
   3  15  -3   18.15    0.82
  -3  15   3   18.84    0.92
  -3  15   3   17.97    0.85
  -3  15   3   17.57    0.88
  -1 -15   3    7.71    0.37
   1 -15  -3    8.47    0.62
   1 -15  -3    8.58    0.54
  -1 -15   3    8.29    0.60
  -1 -15   3    7.41    0.52
   1 -15  -3    7.39    0.54
   1 -15  -3    8.45    0.51
  -1 -15   3    7.88    0.50
  -1  15   3    8.76    0.51
  -1  15   3    7.91    0.48
   1  15  -3    6.90    0.51
  -1  15   3    7.67    0.69
   1  15  -3    9.41    0.50
   1  15  -3    8.08    0.46
   1  15  -3    7.84    0.61
  -1 -15  -3    0.68    0.17
  -1 -15  -3    0.52    0.26
  -1 -15  -3    0.63    0.39
  -1 -15  -3    0.58    0.28
   1 -15   3    0.23    0.35
  -1 -15  -3    0.76    0.33
   1 -15   3    0.69    0.29
   1 -15   3    0.52    0.26
  -1  15  -3    0.53    0.22
   1  15   3    0.58    0.41
   1  15   3    0.71    0.23
   1  15   3    0.23    0.21
  -1  15  -3    0.68    0.20
  -1  15  -3    0.41    0.26
   1  15   3    0.39    0.33
   3 -15   3    0.22    0.28
   3 -15   3    0.22    0.31
  -3 -15  -3    0.10    0.41
   3 -15   3    0.16    0.38
  -3 -15  -3    0.10    0.28
  -3 -15  -3    0.38    0.36
  -3 -15  -3   -0.01    0.24
  -3 -15  -3    0.08    0.16
  -3  15  -3    0.12    0.27
  -3  15  -3    0.13    0.24
   3  15   3    0.25    0.36
  -3  15  -3   -0.10    0.22
   3  15   3    0.27    0.21
   3  15   3    0.40    0.43
  -3  15  -3   -0.25    0.40
  -5 -15  -3    0.92    0.21
  -5 -15  -3    0.82    0.47
  -5 -15  -3    1.49    0.34
   5 -15   3    1.30    0.38
  -5 -15  -3    0.65    0.25
   5  15   3    0.75    0.24
  -5  15  -3    0.79    0.25
  -5  15  -3    0.96    0.34
  -5  15  -3    0.89    0.45
   5  15   3    1.23    0.29
  -5  15  -3    1.28    0.26
   5  15   3    0.88    0.48
   7 -15   3    7.29    0.66
  -7 -15  -3    6.20    0.47
  -7 -15  -3    7.69    0.62
  -7 -15  -3    6.58    0.80
  -7 -15  -3    6.03    0.45
  -7  15  -3    5.74    0.75
   7  15   3    6.79    0.57
  -7  15  -3    7.01    0.63
  -7  15  -3    5.95    0.49
  -7  15  -3    6.57    0.49
  10 -16  -3    8.78    0.60
  10 -16  -3    8.72    1.00
 -10 -16   3    9.63    0.72
 -10 -16   3    9.05    0.64
  10 -16  -3    9.60    0.81
 -10  16   3    8.66    0.55
 -10  16   3    9.08    0.49
 -10  16   3   10.29    0.65
  10  16  -3    9.07    0.66
  10  16  -3    9.37    0.89
 -10  16   3    9.55    1.13
   8 -16  -3    0.16    0.38
  -8 -16   3    0.32    0.55
   8 -16  -3    0.20    0.54
  -8 -16   3    0.01    0.21
  -8 -16   3    0.09    0.19
   8 -16  -3    0.24    0.36
   8 -16  -3   -0.02    0.25
  -8  16   3    0.31    0.46
   8  16  -3    0.15    0.31
   8  16  -3    0.16    0.28
   8  16  -3    0.13    0.44
  -8  16   3    0.31    0.19
  -8  16   3    0.25    0.31
   6 -16  -3    7.75    0.73
   6 -16  -3    7.52    0.45
  -6 -16   3    7.28    0.54
   6 -16  -3    6.55    0.60
  -6 -16   3    6.96    0.42
  -6 -16   3    6.78    0.45
   6  16  -3    6.91    0.49
   6  16  -3    6.68    0.42
   6  16  -3    6.96    0.51
   6  16  -3    6.88    0.68
  -6  16   3    7.27    0.54
  -6  16   3    7.46    0.44
   4 -16  -3    0.48    0.18
  -4 -16   3    0.33    0.24
   4 -16  -3    0.37    0.32
  -4 -16   3    0.24    0.14
   4 -16  -3    0.42    0.43
   4 -16  -3    0.79    0.31
  -4  16   3    0.09    0.27
   4  16  -3    0.35    0.24
   4  16  -3    0.68    0.21
  -4  16   3    0.67    0.21
   4  16  -3    0.43    0.20
   4  16  -3    0.92    0.43
  -4  16   3    0.57    0.35
  -2 -16   3   10.53    0.52
   2 -16  -3   12.33    0.86
  -2 -16   3   10.71    0.64
   2 -16  -3   10.67    0.70
   2 -16  -3   10.21    0.79
   2 -16  -3   11.28    0.69
   2 -16  -3   10.53    0.58
   2  16  -3    9.81    0.66
  -2  16   3   11.99    0.63
  -2  16   3   12.88    0.98
  -2  16   3   11.45    0.61
   2  16  -3   10.47    0.75
   2  16  -3   12.43    0.64
   2  16  -3   12.31    0.60
   0 -16  -3    6.76    0.58
   0 -16   3    6.72    0.50
   0 -16  -3    6.17    0.49
   0 -16  -3    6.24    0.53
   0 -16   3    7.50    0.53
   0 -16  -3    5.84    0.40
   0 -16  -3    5.74    0.65
   0  16   3    6.55    0.46
   0  16  -3    6.43    0.51
   0  16   3    6.78    0.70
   0  16   3    6.42    0.46
   0  16  -3    7.32    0.44
   0  16  -3    6.47    0.46
  -2 -16  -3    1.23    0.31
   2 -16   3    0.88    0.32
  -2 -16  -3    0.97    0.20
  -2 -16  -3    1.41    0.48
  -2 -16  -3    1.04    0.33
  -2  16  -3    0.94    0.24
   2  16   3    0.71    0.49
  -2  16  -3    0.68    0.32
   2  16   3    1.14    0.40
   2  16   3    1.31    0.27
   2  16   3    0.78    0.27
  -4 -16  -3   14.33    0.71
  -4 -16  -3   13.34    0.82
   4 -16   3   13.58    0.83
  -4 -16  -3   14.10    0.96
  -4 -16  -3   12.46    0.75
   4  16   3   14.03    0.75
   4  16   3   13.57    0.78
  -4  16  -3   14.84    0.98
   4  16   3   14.95    1.10
  -4  16  -3   14.42    0.83
  -4  16  -3   14.97    0.74
  -6 -16  -3    6.80    0.66
   6 -16   3    7.12    0.69
  -6 -16  -3    6.64    0.52
  -6 -16  -3    6.99    0.47
  -6 -16  -3    7.63    0.89
  -6  16  -3    6.35    0.86
   6  16   3    7.58    0.89
   6  16   3    7.16    0.50
   6  16   3    6.56    0.59
  -6  16  -3    7.11    0.54
   7 -17  -3    5.30    0.71
  -7 -17   3    5.20    0.40
  -7 -17   3    4.34    0.41
   7 -17  -3    5.53    0.63
   7 -17  -3    5.27    0.43
  -7  17   3    5.25    0.41
  -7  17   3    3.63    0.52
  -7  17   3    5.85    0.55
   7  17  -3    5.32    0.74
   7  17  -3    4.99    0.39
   7  17  -3    5.69    0.54
   7  17  -3    5.78    0.51
  -5 -17   3    5.16    0.36
   5 -17  -3    5.27    0.41
  -5 -17   3    4.52    0.45
   5 -17  -3    5.06    0.60
   5 -17  -3    5.51    0.59
   5 -17  -3    5.41    0.78
   5  17  -3    5.77    0.46
  -5  17   3    5.19    0.61
   5  17  -3    6.27    0.75
   5  17  -3    5.12    0.40
  -5  17   3    5.69    0.42
   5  17  -3    4.81    0.46
  -5  17   3    5.86    0.52
   3 -17  -3    0.33    0.20
  -3 -17   3    0.05    0.14
   3 -17  -3    0.36    0.53
  -3 -17   3   -0.04    0.36
  -3 -17   3    0.12    0.30
   3 -17  -3    0.33    0.61
   3 -17  -3    0.23    0.36
   3  17  -3    0.14    0.23
   3  17  -3    0.19    0.48
  -3  17   3    0.05    0.23
   3  17  -3    0.51    0.27
  -3  17   3    0.02    0.29
   1 -17  -3    6.28    0.57
   1 -17  -3    7.96    0.79
   1 -17  -3    6.43    0.64
  -1 -17   3    7.43    0.58
   1 -17  -3    7.72    0.44
  -1 -17   3    6.95    0.57
   1  17  -3    6.53    0.51
  -1  17   3    7.36    0.53
   1  17  -3    6.26    0.75
   1  17  -3    7.29    0.57
  -1  17   3    6.91    0.50
  -1  17   3    6.11    0.84
   1  17  -3    7.69    0.48
  -1 -17  -3    0.20    0.39
  -1 -17  -3    0.33    0.36
   1 -17   3    0.16    0.34
  -1 -17  -3   -0.12    0.19
  -1 -17  -3   -0.63    0.53
   1  17   3   -0.04    0.26
   1  17   3   -0.02    0.28
  -1  17  -3   -0.02    0.33
   1  17   3   -0.22    0.45
   1  17   3    0.20    0.58
  -1  17  -3   -0.05    0.26
  -1  17  -3   -0.01    0.24
  -3 -17  -3    0.31    0.23
   3 -17   3    0.17    0.37
  -3 -17  -3    0.40    0.40
  -3 -17  -3   -0.16    0.61
  -3 -17  -3    0.26    0.35
  -3  17  -3    0.08    0.37
   3  17   3    0.33    0.62
  -3  17  -3    0.36    0.29
   3  17   3    0.10    0.30
  -3  17  -3    0.43    0.27
   3  17   3    0.55    0.30
  -5 -17  -3   -0.08    0.24
  -5 -17  -3    0.86    0.66
  -5 -17  -3    0.11    0.35
  -5 -17  -3    0.30    0.42
   5 -17   3    0.23    0.47
  -5  17  -3   -0.02    0.32
   5  17   3    0.16    0.29
  -5  17  -3   -0.09    0.42
  -5  17  -3    0.01    0.29
   5  17   3    0.39    0.36
   5  17   3    0.68    0.71
   4 -18  -3    2.01    0.49
   4 -18  -3    1.78    0.45
  -4 -18   3    1.79    0.22
   4 -18  -3    1.79    0.27
   4 -18  -3    2.73    1.00
  -4  18   3    2.26    0.48
  -4  18   3    2.95    0.42
  -4  18   3    2.10    0.31
   4  18  -3    1.65    0.61
   4  18  -3    2.23    0.35
   4  18  -3    2.39    0.32
  -2 -18   3    1.65    0.43
   2 -18  -3    1.75    0.46
  -2 -18   3    1.82    0.20
   2 -18  -3    1.20    0.54
   2 -18  -3    1.61    0.26
  -2 -18   3    2.25    0.42
   2  18  -3    1.80    0.60
  -2  18   3    1.70    0.37
   2  18  -3    2.85    0.44
   2  18  -3    1.57    0.33
   0 -18  -3    1.56    0.45
   0 -18  -3    0.38    0.64
   0 -18   3    1.10    0.41
   0  18  -3    1.18    0.33
   0  18   3    1.10    0.34
   0  18  -3    1.20    0.39
   0  18  -3    1.06    0.31
   0  18   3    1.20    0.83
   0  18   3    1.11    0.31
  -2 -18  -3    1.41    0.27
   2 -18   3    1.56    0.44
  -2 -18  -3    1.45    0.68
  -2 -18  -3    2.19    0.49
   2  18   3    1.82    0.82
   2  18   3    1.26    0.33
  -2  18  -3    1.32    0.33
   2  18   3    1.90    0.38
  -2  18  -3    2.39    0.45
  -2  18  -3    1.97    0.33
 -18   0   4    1.63    0.40
  18   0  -4    2.17    0.28
 -18   0   4    2.51    0.30
 -18   0   4    1.73    0.37
 -18   0   4    2.32    0.28
  18   0  -4    2.33    0.43
  16   0  -4   17.06    0.80
 -16   0   4   17.47    0.80
 -16   0   4   17.40    0.88
  16   0  -4   16.31    0.88
  16   0  -4   16.89    0.81
 -16   0   4   17.23    0.82
 -16   0   4   17.68    0.89
 -14   0   4   45.83    2.14
 -14   0   4   46.44    2.15
  14   0  -4   48.67    2.15
  14   0  -4   46.53    2.14
  14   0  -4   48.38    2.10
 -14   0   4   50.36    2.11
 -14   0   4   50.00    2.11
  14   0  -4   46.12    2.11
 -12   0   4    4.65    0.29
  12   0  -4    4.28    0.24
  12   0  -4    4.18    0.32
 -12   0   4    4.10    0.32
 -12   0   4    4.01    0.25
  12   0  -4    4.64    0.25
  12   0  -4    4.48    0.30
 -12   0   4    4.53    0.26
 -10   0   4   69.73    3.02
  10   0  -4   70.59    3.02
 -10   0   4   67.09    3.02
  10   0  -4   69.16    3.02
  10   0  -4   70.02    3.04
 -10   0   4   68.79    3.03
 -10   0   4   67.19    3.05
  10   0  -4   70.77    3.04
  -8   0   4   28.95    1.22
   8   0  -4   27.10    1.22
   8   0  -4   27.84    1.22
   8   0  -4   27.27    1.23
   8   0  -4   27.72    1.24
  -8   0   4   27.61    1.25
  -8   0   4   27.43    1.23
  -6   0   4   18.50    0.83
  -6   0   4   19.64    0.86
   6   0  -4   18.85    0.84
   6   0  -4   18.34    0.84
   6   0  -4   17.99    0.84
   6   0  -4   19.43    0.86
  -6   0   4   19.87    0.85
   4   0  -4    2.40    0.14
   4   0  -4    2.36    0.11
  -4   0   4    2.19    0.14
   4   0  -4    2.16    0.15
   4   0  -4    2.56    0.15
   2   0  -4    5.34    0.27
   2   0  -4    5.49    0.27
   2   0  -4    5.17    0.28
  -2   0   4    5.28    0.27
   2   0  -4    5.19    0.25
   0   0   4  103.37    4.60
   0   0  -4  101.65    4.59
   0   0  -4  107.33    4.59
   0   0   4  106.60    4.59
   0   0   4  106.48    4.58
   0   0  -4  106.91    4.60
  -2   0  -4    1.59    0.11
  -2   0  -4    1.38    0.15
  -2   0  -4    1.58    0.12
   2   0   4    1.32    0.11
   2   0   4    1.34    0.14
  -2   0  -4    1.31    0.10
   2   0   4    1.24    0.11
   4   0   4  446.39   20.38
  -4   0  -4  493.60   20.38
   6   0   4   68.17    3.19
   6   0   4   75.49    3.18
  -6   0  -4   72.83    3.19
  -6   0  -4   73.48    3.19
  -6   0  -4   71.00    3.18
   6   0   4   74.11    3.24
  -6   0  -4   72.81    3.17
  -8   0  -4   15.24    0.75
   8   0   4   15.58    0.75
  -8   0  -4   16.07    0.71
   8   0   4   15.33    0.72
  -8   0  -4   15.08    0.71
  -8   0  -4   15.16    0.75
   8   0   4   14.80    0.75
  10   0   4    3.36    0.38
 -10   0  -4    3.42    0.25
 -10   0  -4    3.16    0.25
  10   0   4    3.58    0.31
 -10   0  -4    3.31    0.34
  10   0   4    3.08    0.34
 -10   0  -4    3.27    0.35
 -12   0  -4    0.19    0.17
 -12   0  -4   -0.05    0.28
  12   0   4    0.19    0.35
  12   0   4   -0.09    0.26
 -12   0  -4    0.30    0.32
  12   0   4    0.17    0.26
 -12   0  -4    0.00    0.18
 -14   0  -4   13.08    0.68
 -14   0  -4   13.89    0.73
  14   0   4   13.20    0.94
  14   0   4   13.55    0.81
 -14   0  -4   13.15    0.85
 -17  -1   4    6.00    0.34
  17  -1  -4    5.81    0.39
 -17  -1   4    5.91    0.45
  17  -1  -4    5.90    0.39
 -17  -1   4    6.14    0.52
 -17  -1   4    5.56    0.52
  17  -1  -4    6.46    0.55
 -17   1   4    4.92    0.52
 -17   1   4    5.54    0.39
  17   1  -4    5.90    0.34
  17   1  -4    4.98    0.54
 -17   1   4    6.37    0.52
 -17   1   4    5.90    0.38
  17   1  -4    5.62    0.41
  15  -1  -4    2.60    0.33
 -15  -1   4    2.67    0.46
  15  -1  -4    2.44    0.32
  15  -1  -4    2.75    0.26
 -15  -1   4    3.20    0.31
 -15  -1   4    2.40    0.21
  15  -1  -4    2.01    0.23
 -15  -1   4    2.76    0.29
  15   1  -4    2.47    0.34
 -15   1   4    1.98    0.27
  15   1  -4    2.70    0.36
 -15   1   4    2.42    0.24
  15   1  -4    2.19    0.25
 -15   1   4    1.77    0.28
 -15   1   4    2.36    0.23
  15   1  -4    2.48    0.20
  13  -1  -4   24.49    1.13
  13  -1  -4   24.05    1.13
 -13  -1   4   25.43    1.09
  13  -1  -4   23.91    1.08
 -13  -1   4   24.35    1.10
  13  -1  -4   25.02    1.09
 -13  -1   4   24.15    1.14
 -13  -1   4   23.30    1.12
  13   1  -4   24.60    1.08
 -13   1   4   24.55    1.10
  13   1  -4   24.40    1.13
 -13   1   4   23.05    1.12
 -13   1   4   24.09    1.14
  13   1  -4   25.06    1.13
  13   1  -4   23.51    1.09
 -13   1   4   24.94    1.09
 -11  -1   4    1.15    0.17
 -11  -1   4    1.18    0.12
 -11  -1   4    1.06    0.13
  11  -1  -4    1.04    0.17
  11  -1  -4    1.06    0.12
  11  -1  -4    1.09    0.15
 -11  -1   4    0.98    0.14
  11  -1  -4    0.81    0.11
  11   1  -4    1.19    0.17
 -11   1   4    1.16    0.15
 -11   1   4    0.92    0.16
  11   1  -4    1.28    0.16
  11   1  -4    0.94    0.13
 -11   1   4    1.08    0.13
 -11   1   4    1.10    0.13
  11   1  -4    0.86    0.10
   9  -1  -4    0.85    0.11
  -9  -1   4    0.83    0.10
   9  -1  -4    0.93    0.10
  -9  -1   4    0.86    0.10
  -9  -1   4    0.90    0.13
   9  -1  -4    0.73    0.14
  -9  -1   4    0.86    0.13
   9  -1  -4    0.77    0.08
   9   1  -4    0.72    0.09
   9   1  -4    0.97    0.11
   9   1  -4    0.78    0.10
  -9   1   4    0.89    0.10
  -9   1   4    0.65    0.13
   9   1  -4    0.86    0.14
  -9   1   4    0.65    0.10
  -7  -1   4   49.64    2.18
  -7  -1   4   50.97    2.18
   7  -1  -4   48.85    2.18
   7  -1  -4   48.41    2.17
   7  -1  -4   50.21    2.19
   7  -1  -4   48.87    2.20
  -7   1   4   48.24    2.19
  -7   1   4   48.05    2.18
   7   1  -4   51.61    2.18
   7   1  -4   52.58    2.18
   7   1  -4   52.07    2.20
  -7   1   4   47.82    2.20
   7   1  -4   51.26    2.18
   5  -1  -4   22.54    0.95
  -5  -1   4   20.40    0.95
   5  -1  -4   21.25    0.94
   5  -1  -4   21.87    0.93
   5  -1  -4   21.84    0.94
   5   1  -4   20.91    0.94
  -5   1   4   21.73    0.94
   5   1  -4   19.97    0.94
   5   1  -4   21.02    0.93
   5   1  -4   19.82    0.94
   3  -1  -4  413.93   20.16
   3  -1  -4  516.39   20.17
  -1  -1   4  182.28    8.28
   1  -1  -4  189.24    8.28
  -1   1   4  190.88    8.28
   1   1  -4  195.81    8.26
  -1   1   4  177.90    8.28
  -1   1   4  204.73    8.26
   1   1  -4  192.48    8.28
   1  -1   4    9.32    0.46
  -1  -1  -4    9.57    0.46
  -1  -1  -4    9.36    0.44
  -1  -1  -4    9.64    0.46
   1  -1   4    9.56    0.44
  -1  -1  -4    9.84    0.44
   1  -1   4   10.13    0.44
   1   1   4    9.48    0.46
   1   1   4   10.28    0.44
   1   1   4    9.36    0.45
  -1   1  -4    9.75    0.46
  -1   1  -4    9.22    0.43
  -1   1  -4    9.61    0.45
  -1   1  -4    9.03    0.44
  -3  -1  -4   43.83    1.95
  -3  -1  -4   46.05    1.97
  -3  -1  -4   43.44    1.96
   3  -1   4   45.67    1.95
   3  -1   4   43.21    1.98
  -3  -1  -4   43.59    1.96
   3  -1   4   42.77    1.96
  -3   1  -4   45.22    1.98
   3   1   4   45.30    1.96
   3   1   4   48.44    1.99
  -3   1  -4   43.92    1.95
   3   1   4   45.15    1.96
  -3   1  -4   44.45    1.96
  -3   1  -4   43.21    1.96
  -5  -1  -4    2.95    0.20
   5  -1   4    2.45    0.23
  -5  -1  -4    2.51    0.17
   5  -1   4    3.02    0.20
  -5  -1  -4    2.69    0.24
   5  -1   4    2.61    0.21
  -5  -1  -4    2.79    0.18
   5  -1   4    2.52    0.17
   5   1   4    2.86    0.21
   5   1   4    2.57    0.18
  -5   1  -4    2.40    0.17
  -5   1  -4    2.37    0.33
  -5   1  -4    2.74    0.20
  -5   1  -4    2.66    0.16
   5   1   4    3.06    0.23
  -7  -1  -4   32.14    1.43
  -7  -1  -4   30.90    1.43
   7  -1   4   32.22    1.45
  -7  -1  -4   33.21    1.46
   7  -1   4   33.34    1.45
   7  -1   4   31.47    1.46
  -7  -1  -4   32.59    1.46
  -7   1  -4   33.02    1.46
  -7   1  -4   31.50    1.46
   7   1   4   31.43    1.46
   7   1   4   32.17    1.44
  -7   1  -4   31.44    1.43
   7   1   4   32.55    1.47
  -7   1  -4   32.83    1.44
  -9  -1  -4   26.89    1.22
  -9  -1  -4   27.63    1.22
   9  -1   4   25.95    1.25
  -9  -1  -4   27.18    1.25
   9  -1   4   25.88    1.24
  -9  -1  -4   28.35    1.26
   9  -1   4   26.79    1.26
   9  -1   4   27.44    1.22
  -9   1  -4   28.60    1.26
   9   1   4   27.31    1.26
  -9   1  -4   26.68    1.22
   9   1   4   26.10    1.25
   9   1   4   26.22    1.23
  -9   1  -4   27.73    1.22
  -9   1  -4   26.62    1.25
  11  -1   4   18.14    0.90
 -11  -1  -4   19.08    0.93
 -11  -1  -4   19.23    0.87
  11  -1   4   17.82    0.95
 -11  -1  -4   19.15    0.94
  11  -1   4   18.37    0.94
 -11  -1  -4   19.33    0.89
 -11   1  -4   18.65    0.93
  11   1   4   18.80    0.94
  11   1   4   18.84    0.91
 -11   1  -4   17.47    0.93
 -11   1  -4   19.03    0.88
 -11   1  -4   19.26    0.87
  11   1   4   17.71    0.96
 -13  -1  -4    1.19    0.35
  13  -1   4    1.20    0.32
 -13  -1  -4    1.06    0.24
 -13  -1  -4    1.12    0.21
 -13  -1  -4    1.03    0.35
  13  -1   4    1.88    0.34
 -13   1  -4    1.21    0.34
 -13   1  -4    1.87    0.38
  13   1   4    0.68    0.47
 -13   1  -4    1.20    0.22
  13   1   4    0.79    0.46
 -13   1  -4    1.06    0.24
 -15  -1  -4    1.64    0.34
 -15  -1  -4    1.90    0.26
  15  -1   4    1.13    0.41
 -15  -1  -4    1.92    0.47
 -15   1  -4    1.12    0.31
 -15   1  -4    1.43    0.28
  15   1   4    1.16    0.40
 -15   1  -4    1.58    0.46
  18  -2  -4    0.32    0.20
 -18  -2   4    0.06    0.34
  18  -2  -4    0.50    0.43
 -18  -2   4    0.00    0.33
 -18  -2   4    0.23    0.38
  18  -2  -4    0.15    0.28
 -18  -2   4    0.30    0.12
 -18   2   4    0.15    0.35
 -18   2   4    0.00    0.39
  18   2  -4    0.23    0.41
  18   2  -4    0.13    0.27
 -18   2   4    0.83    0.25
 -18   2   4    0.49    0.20
 -16  -2   4    6.55    0.48
 -16  -2   4    5.91    0.47
 -16  -2   4    5.93    0.44
  16  -2  -4    6.30    0.39
  16  -2  -4    7.17    0.52
  16  -2  -4    5.81    0.35
 -16  -2   4    6.70    0.32
 -16   2   4    6.17    0.35
  16   2  -4    6.17    0.40
  16   2  -4    5.84    0.31
 -16   2   4    5.78    0.49
  16   2  -4    5.98    0.56
 -16   2   4    5.76    0.39
 -16   2   4    6.01    0.48
  14  -2  -4    2.91    0.31
[truncated: 470,923 more chars]
