# Supplementary material for: Multicolor Photochromism of Two-Component Diarylethene Crystals Containing Oxidized and Unoxidized Benzothiophene Groups
Source: MDPI journal article supplement (doi:10.3390/cryst12121730), 2022-11-29
Supplement: s1 [file s1 › crystals-2054041-Supplementary Figures.pdf]

Supplementary material

**Multicolor Photochromism of Two-Component Diarylethene Crystals Containing Oxidized and Unoxidized Benzothiophene Groups**

Ryo Nishimura <sup>1</sup>, Yurika Nagakawa <sup>1</sup> and Masakazu Morimoto <sup>1,\*</sup>

<sup>1</sup> Department of Chemistry and Research Center for Smart Molecules, Rikkyo University, 3-34-1 Ni-shi-Ikebukuro, Toshima-ku, Tokyo 171-8501, Japan

\* Correspondence: m-morimoto@rikkyo.ac.jp; Tel.: +81-3-3985-4695

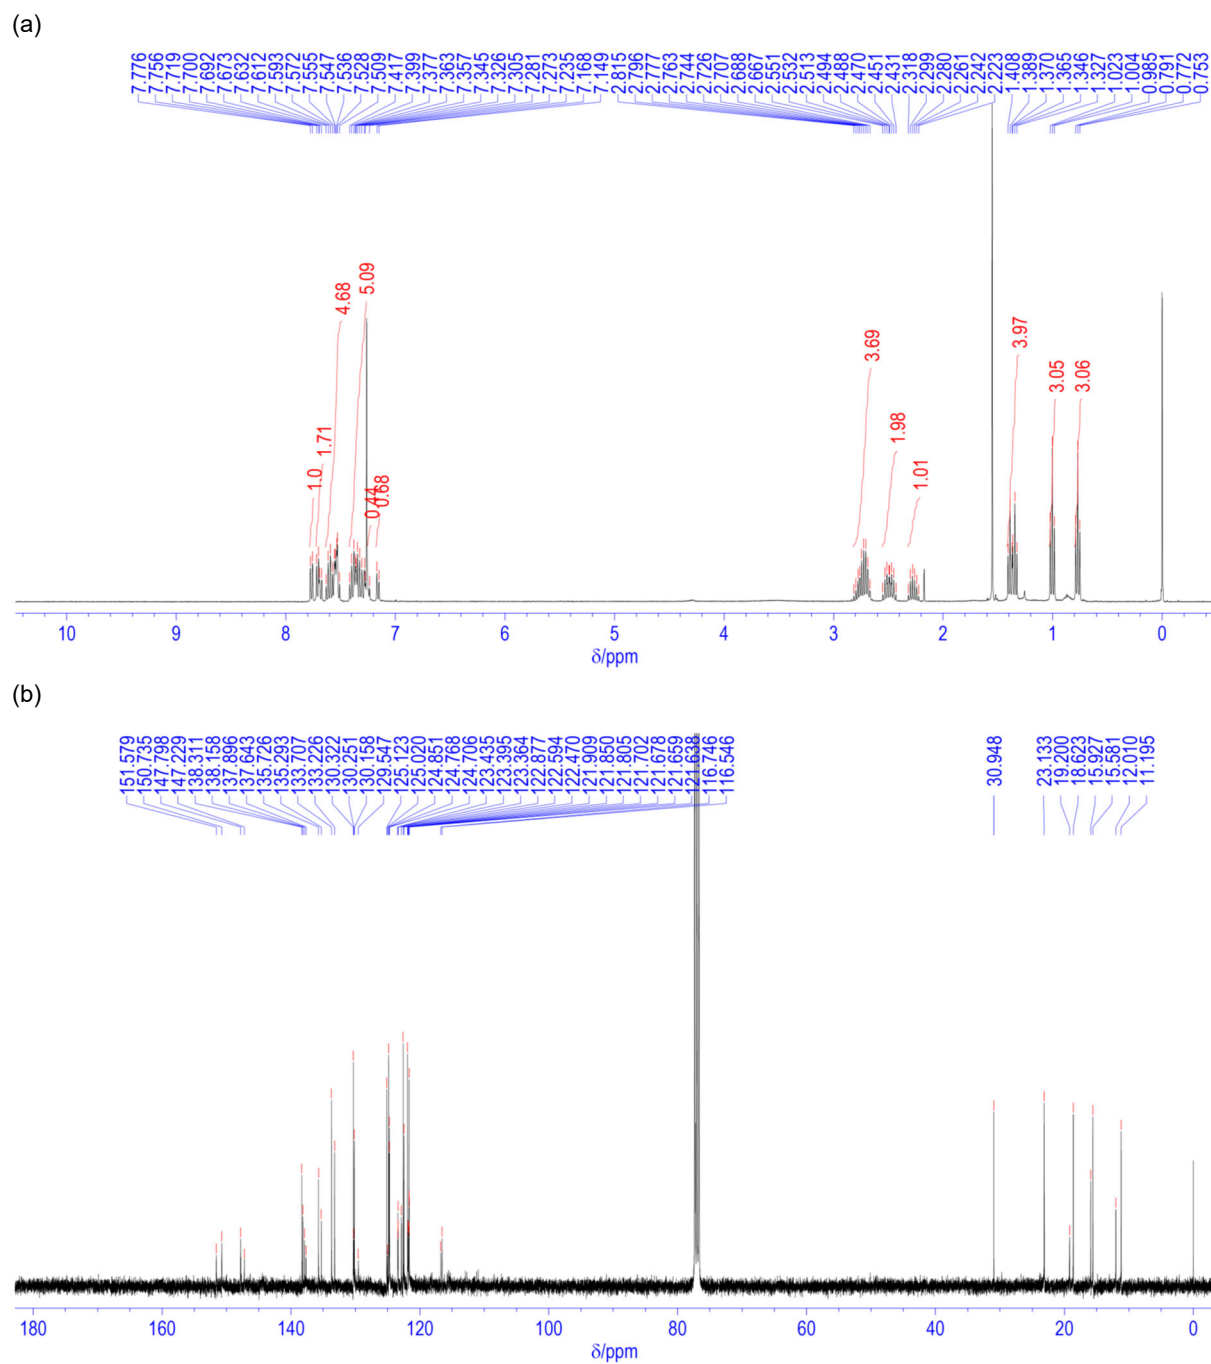

**Figure S1.** (a) 400MHz  $^1\text{H}$  NMR spectrum of **2a** in  $\text{CDCl}_3$ . (b) 100 MHz  $^{13}\text{C}$  NMR spectrum of **2a** in  $\text{CDCl}_3$ . The NMR spectra contain signals of anti-parallel and parallel conformers of the open-ring isomer **2a**.

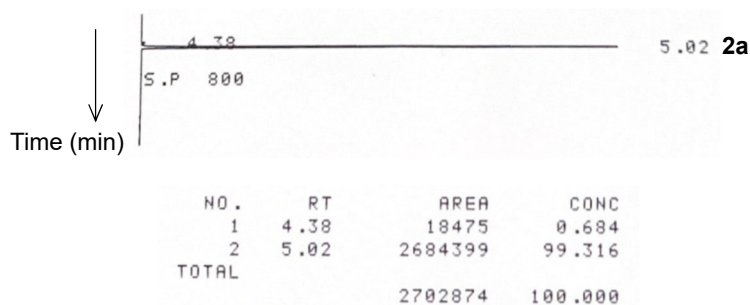

**Figure S2.** HPLC chromatogram of **2a** after recrystallization from diethyl ether. Pump: Hitachi L-2130, detector: Hitachi L-2420, column: Wakosil® 5SIL ( $\phi 4.6$  mm  $\times$  250 mm), eluent: hexane/ethyl acetate = 70/30, 1 mL min<sup>-1</sup>, detection: 313 nm. The purity (> 99%) of **2a** was confirmed.

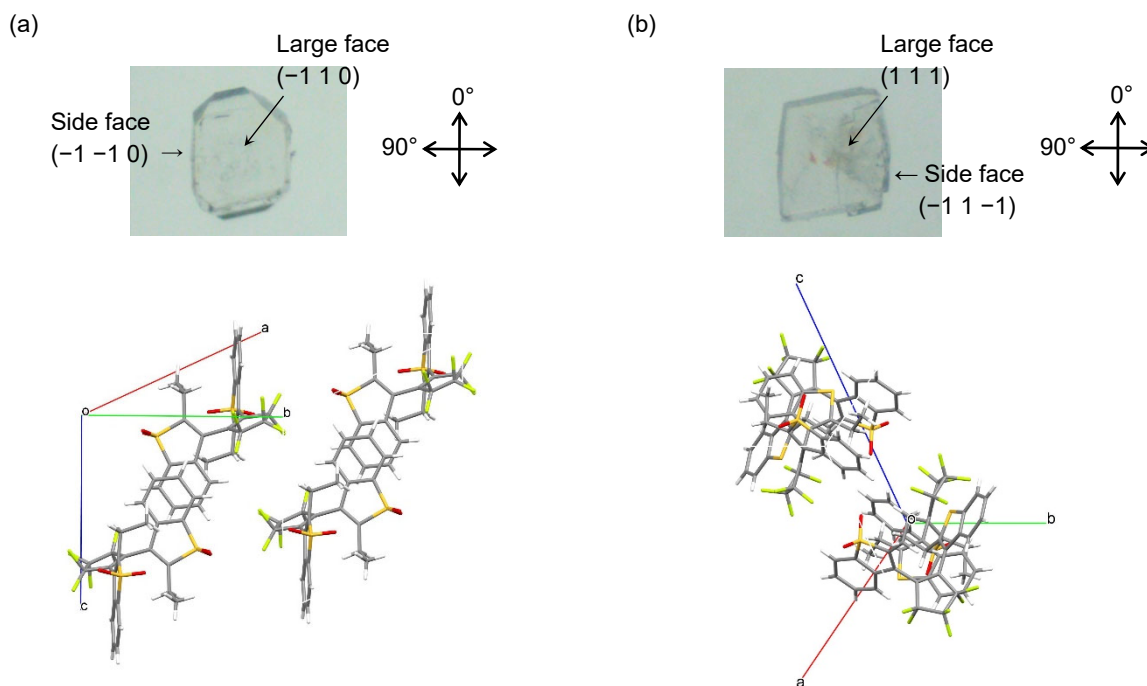

**Figure S3.** Molecular packing diagrams of single-component crystal of **1a** viewed from  $(-1\ 1\ 0)$  face (a) and single-component crystal of **2a** viewed from  $(1\ 1\ 1)$  face (b). The polarized absorption spectra were measured on  $(-1\ 1\ 0)$  and  $(1\ 1\ 1)$  faces for **1a** and **2a**, respectively. The arrows indicate the direction in the polarized absorption spectral measurement in Figure 3. The direction of  $0^\circ$  is parallel to  $(-1\ -1\ 0)$  face for **1a** and  $(-1\ 1\ -1)$  for **2a**.

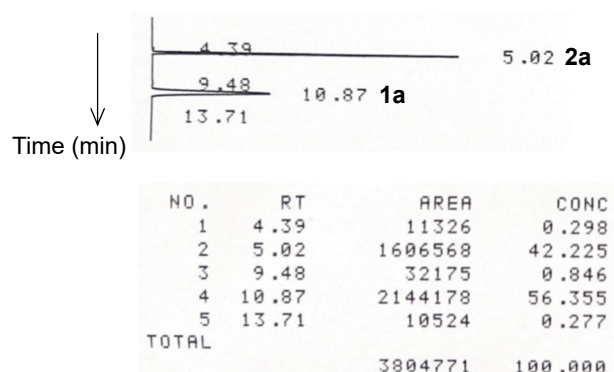

**Figure S4.** HPLC chromatogram of two-component mixed crystal containing **1a** and **2a** (entry 3 in Table 2). Pump: Hitachi L-2130, detector: Hitachi L-2420, column: Wakosil® 5SIL (φ4.6 mm × 250 mm), eluent: hexane/ethyl acetate = 70/30, 1 mL min<sup>-1</sup>, detection: 313 nm. The composition ratio of **1a** : **2a** was calculated to be 53 : 47 by correcting the peak areas in HPLC with molar absorption coefficients of **1a** and **2a** at 313 nm (**1a**: 5.01 × 10<sup>3</sup> M<sup>-1</sup> cm<sup>-1</sup>, **2a**: 4.21 × 10<sup>3</sup> M<sup>-1</sup> cm<sup>-1</sup>).

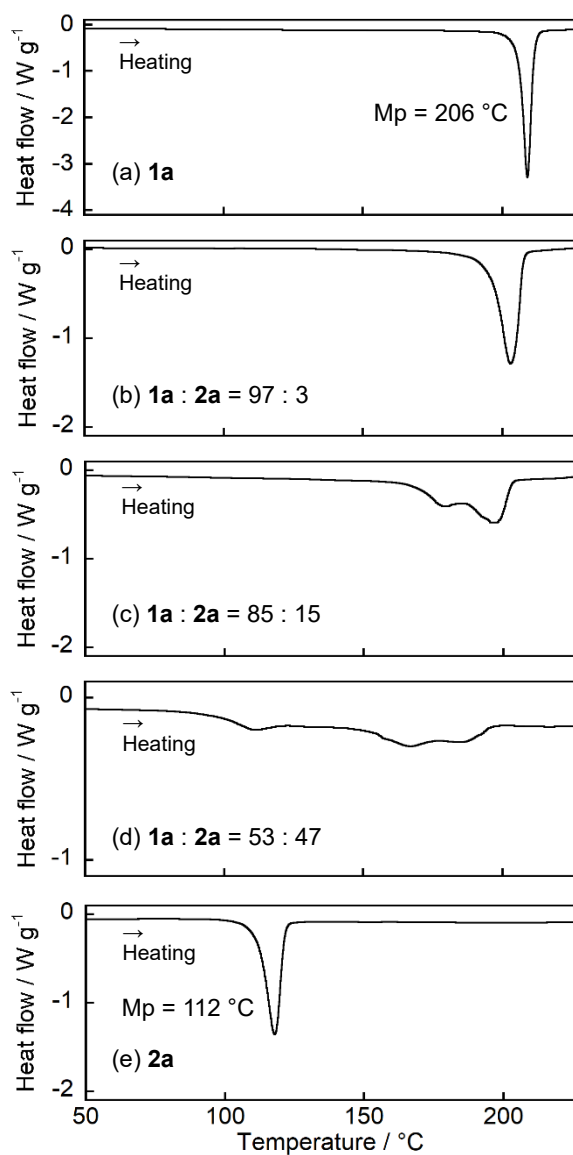

**Figure S5.** DSC curves for single-component crystals of **1a** and **2a** and two-component mixed crystals containing **1a** and **2a**. (a) **1a**, (b) **1a** : **2a** = 97 : 3 (entry 1 in Table 2), (c) **1a** : **2a** = 85 : 15 (entry 2), (d) **1a** : **2a** = 53 : 47 (entry 3), (e) **2a**. The scan rate was 10 °C min<sup>-1</sup>.

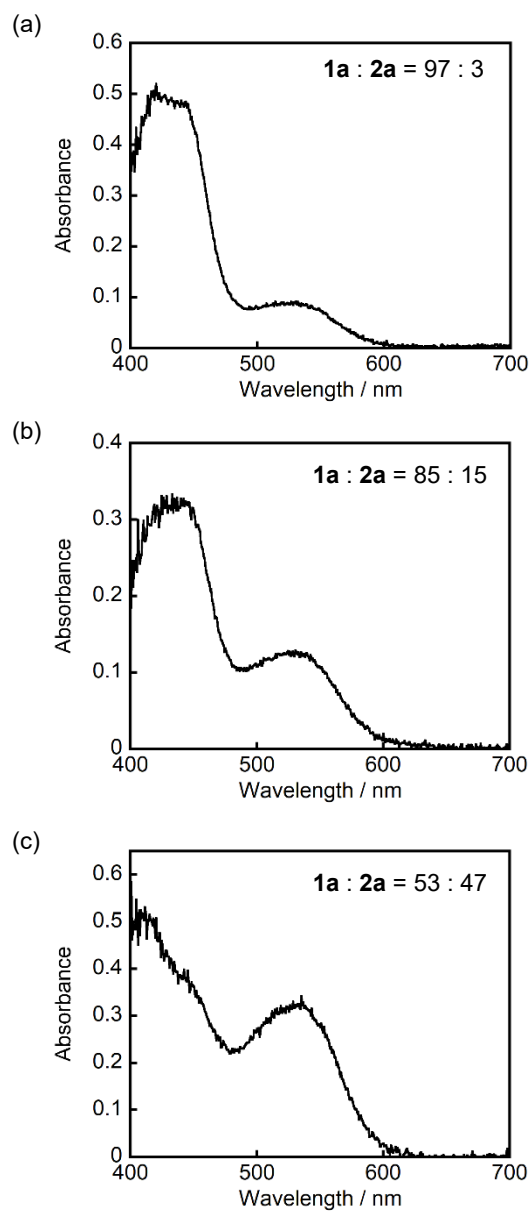

**Figure S6.** Absorption spectra of two-component mixed crystals containing **1a** and **2a** with different composition ratios after irradiation with 365 nm light. (a)  $1\mathbf{a} : 2\mathbf{a} = 97 : 3$  (entry 1 in Table 2), (b)  $1\mathbf{a} : 2\mathbf{a} = 85 : 15$  (entry 2), (c)  $1\mathbf{a} : 2\mathbf{a} = 53 : 47$  (entry 3).
