# Supplementary material for: Multicolor Photochromism of Two-Component Diarylethene Crystals Containing Oxidized and Unoxidized Benzothiophene Groups
Source: MDPI journal article supplement (doi:10.3390/cryst12121730), 2022-11-29
Supplement: s1 [file s1 › morimoto_crystals_cmpd-check-list.pdf]

## Manuscript ID:

Submitting Author:

[illegible]

Note: insert the relevant information and select only the techniques used in this study. In the empty columns you can insert any additional methods.

[illegible]

[illegible]

[illegible]

[illegible]
